# Supplementary material
Source: PubMed Central journal article supplement (PMC337064)
Supplement: pnas_0308044100_1.pdf [file pnas_0308044100_1.pdf]

**Table 1. 305\_1hr\_increase**

|    | Probe set   | Fold induction             |         |         |            | Fold induction             |         |         |            | Identifier |                                                                         |
|----|-------------|----------------------------|---------|---------|------------|----------------------------|---------|---------|------------|------------|-------------------------------------------------------------------------|
|    |             | Expression level (327, 1h) | 305, 1h | 295, 1h | quartz, 1h | Expression level (327, 1h) | 305, 6h | 295, 6h | quartz, 6h |            |                                                                         |
| 1  | 265892_at   | 70                         | 29.9    | 3.8     | 2.3        | 32                         | 5.0     | 0.9     | 3.7        | AT2G15020  | expressed protein                                                       |
| 2  | 260023_at   | 83                         | 10.6    | 28.2    | 15.1       | 102                        | 1.5     | 1.5     | 4.0        | AT1G30040  | gibberellin 2-oxidase (GA2-oxidase) (ga2ox2)                            |
| 3  | 245306_at   | 2489                       | 7.8     | 7.8     | 5.2        | 444                        | 1.5     | 3.8     | 5.4        | AT4G14690  | expressed protein                                                       |
| 4  | 266832_at   | 89                         | 7.2     | 8.8     | 6.5        | 114                        | 1.3     | 1.9     | 2.8        | AT2G30040  | protein kinase family                                                   |
| 5  | 260522_x_at | 164                        | 6.9     | 47.7    | 47.2       | 157                        | 0.8     | 4.5     | 43.9       | AT2G41730  | expressed protein                                                       |
| 6  | 248347_at   | 275                        | 6.5     | 9.3     | 4.6        | 118                        | 1.0     | 1.4     | 2.5        | AT5G52250  | transducin / WD-40 repeat protein family                                |
| 7  | 257595_at   | 33                         | 6.1     | 4.9     | 1.4        | 52                         | 0.6     | 0.5     | 0.4        | AT3G24750  | hypothetical protein                                                    |
| 8  | 245560_at   | 282                        | 6.1     | 5.1     | 1.7        | 53                         | 1.9     | 2.7     | 3.7        | AT4G15480  | UDP-glycosyltransferase family                                          |
| 9  | 265197_at   | 125                        | 6.1     | 7.9     | 4.5        | 113                        | 1.3     | 2.5     | 3.7        | AT2G36750  | UDP-glycosyltransferase family                                          |
| 10 | 257262_at   | 331                        | 5.9     | 5.8     | 3.2        | 140                        | 0.8     | 0.7     | 1.2        | AT3G21890  | CONSTANS B-box zinc finger family protein                               |
| 11 | 264042_at   | 163                        | 5.4     | 30.3    | 25.7       | 157                        | 0.8     | 5.8     | 36.7       | AT2G03760  | steroid sulfotransferase, putative                                      |
| 12 | 265200_s_at | 139                        | 4.7     | 13.3    | 11.6       | 144                        | 1.4     | 2.6     | 5.6        | AT2G36790  | glucosyl transferase -related                                           |
| 13 | 250007_at   | 79                         | 4.7     | 4.3     | 4.8        | 57                         | 3.2     | 2.7     | 2.6        | AT5G18670  | glycosyl hydrolase family 14 (beta-amylase)                             |
| 14 | 258321_at   | 3369                       | 4.5     | 3.8     | 2.6        | 466                        | 1.1     | 4.7     | 7.3        | AT3G22840  | early light-induced protein                                             |
| 15 | 249769_at   | 1482                       | 4.3     | 2.9     | 1.6        | 291                        | 0.9     | 1.4     | 3.1        | AT5G24120  | sigma-related factor (emb CAA77213.1)                                   |
| 16 | 250781_at   | 458                        | 4.3     | 4.5     | 2.6        | 228                        | 1.0     | 1.6     | 6.6        | AT5G05410  | DRE binding protein (DREB2A)                                            |
| 17 | 265668_at   | 140                        | 4.3     | 14.8    | 15.4       | 127                        | 1.1     | 1.3     | 7.9        | AT2G32020  | GCN5-related N-acetyltransferase (GNAT) family                          |
| 18 | 261192_at   | 278                        | 4.2     | 7.7     | 4.7        | 210                        | 1.0     | 2.2     | 10.2       | AT1G32870  | NAM protein -related                                                    |
| 19 | 251605_at   | 170                        | 4.2     | 3.6     | 1.5        | 159                        | 1.2     | 0.8     | 0.4        | AT3G57830  | leucine-rich repeat transmembrane protein kinase, putative              |
| 20 | 247655_at   | 274                        | 4.2     | 12.2    | 13.1       | 203                        | 1.2     | 2.2     | 7.6        | AT5G59820  | zinc finger protein Zat12                                               |
| 21 | 260784_at   | 415                        | 4.1     | 2.9     | 0.9        | 274                        | 1.0     | 1.1     | 1.0        | AT1G06180  | myb family transcription factor                                         |
| 22 | 246523_at   | 478                        | 3.9     | 2.1     | 1.1        | 245                        | 1.0     | 1.4     | 1.6        | AT5G15850  | Zinc finger protein CONSTANS-LIKE 1 (COL1)                              |
| 23 | 255881_at   | 274                        | 3.8     | 4.0     | 1.6        | 247                        | 1.1     | 0.9     | 0.8        | AT1G67070  | phosphomannose isomerase -related                                       |
| 24 | 259076_at   | 61                         | 3.7     | 3.8     | 2.6        | 129                        | 0.7     | 0.8     | 1.3        | AT3G02140  | expressed protein                                                       |
| 25 | 249677_at   | 3981                       | 3.6     | 2.3     | 1.4        | 545                        | 1.0     | 1.9     | 3.7        | AT5G35970  | DNA helicase-related                                                    |
| 26 | 263122_at   | 1024                       | 3.6     | 2.6     | 1.4        | 429                        | 1.1     | 1.4     | 1.4        | AT1G78510  | geranyl diphosphate synthase (GPPS)(dimethylallyltransferase), putative |
| 27 | 254459_at   | 283                        | 3.6     | 2.3     | 1.2        | 62                         | 1.0     | 0.7     | 3.3        | AT4G21200  | gibberellin 20-oxidase family                                           |
| 28 | 248596_at   | 185                        | 3.5     | 3.4     | 0.7        | 495                        | 1.1     | 1.4     | 0.5        | AT5G49330  | myb family transcription factor                                         |
| 29 | 253496_at   | 1307                       | 3.5     | 3.0     | 2.0        | 425                        | 1.7     | 3.0     | 2.9        | AT4G31870  | glutathione peroxidase, putative                                        |
| 30 | 259964_at   | 218                        | 3.5     | 2.4     | 1.2        | 168                        | 1.2     | 0.6     | 0.6        | AT1G53680  | glutathione transferase, putative                                       |
| 31 | 248207_at   | 1185                       | 3.4     | 2.6     | 1.4        | 360                        | 1.0     | 1.8     | 2.5        | AT5G53970  | aminotransferase, putative                                              |

|    |             |      |     |      |      |      |     |     |      |           |                                          |
|----|-------------|------|-----|------|------|------|-----|-----|------|-----------|------------------------------------------|
| 32 | 249191_at   | 706  | 3.4 | 3.6  | 2.1  | 962  | 1.0 | 0.7 | 0.4  | AT5G42760 | expressed protein                        |
| 33 | 251137_at   | 230  | 3.3 | 3.5  | 2.4  | 110  | 1.2 | 1.6 | 2.6  | AT5G01300 | expressed protein                        |
| 34 | 260727_at   | 273  | 3.2 | 2.6  | 1.1  | 127  | 1.1 | 0.9 | 0.5  | AT1G48100 | polygalacturonase, putative              |
| 35 | 257840_at   | 84   | 3.1 | 14.2 | 16.0 | 118  | 0.9 | 1.1 | 5.4  | AT3G25250 | protein kinase family                    |
| 36 | 257081_at   | 149  | 3.0 | 3.8  | 2.7  | 184  | 1.3 | 1.0 | 0.9  | AT3G30460 | C3HC4-type zinc finger protein family    |
| 37 | 248668_at   | 162  | 3.0 | 2.8  | 2.1  | 151  | 1.5 | 3.2 | 5.7  | AT5G48720 | hypothetical protein                     |
| 38 | 267066_at   | 445  | 2.9 | 2.4  | 1.4  | 190  | 1.3 | 2.5 | 3.3  | AT2G41040 | expressed protein                        |
| 39 | 261958_at   | 375  | 2.9 | 2.4  | 1.5  | 176  | 1.2 | 1.4 | 1.2  | AT1G64500 | peptide transporter -related             |
| 40 | 258188_at   | 4694 | 2.9 | 2.0  | 1.4  | 997  | 1.1 | 1.7 | 3.3  | AT3G17800 | expressed protein                        |
| 41 | 262626_at   | 2275 | 2.9 | 2.1  | 1.1  | 909  | 1.1 | 2.3 | 2.5  | AT1G06430 | FtsH protease, putative                  |
| 42 | 251727_at   | 3860 | 2.8 | 1.8  | 1.0  | 1282 | 1.0 | 0.9 | 1.0  | AT3G56290 | expressed protein                        |
| 43 | 246584_at   | 177  | 2.8 | 9.5  | 8.0  | 180  | 0.8 | 1.0 | 2.8  | AT5G14730 | expressed protein                        |
| 44 | 258742_at   | 824  | 2.8 | 2.2  | 1.0  | 316  | 0.9 | 0.7 | 1.5  | AT3G05800 | bHLH protein                             |
| 45 | 262705_at   | 339  | 2.7 | 3.0  | 2.2  | 284  | 0.7 | 0.8 | 1.5  | AT1G16260 | wall-associated kinase -related          |
| 46 | 246468_at   | 1946 | 2.7 | 2.9  | 1.4  | 1043 | 1.3 | 1.7 | 1.7  | AT5G17050 | glycosyltransferase family               |
| 47 | 249798_at   | 1433 | 2.6 | 2.5  | 1.2  | 175  | 1.1 | 2.1 | 2.1  | AT5G23730 | transducin / WD-40 repeat protein family |
| 48 | 253922_at   | 3454 | 2.6 | 2.2  | 1.2  | 3995 | 1.2 | 0.9 | 0.5  | AT4G26850 | expressed protein                        |
| 49 | 250049_at   | 492  | 2.6 | 2.4  | 1.3  | 193  | 0.9 | 1.7 | 2.4  | AT5G17780 | hydrolase, alpha/beta fold family        |
| 50 | 252131_at   | 98   | 2.6 | 41.3 | 42.0 | 109  | 0.7 | 1.9 | 31.4 | AT3G50930 | AAA-type ATPase family                   |
| 51 | 251020_at   | 2743 | 2.5 | 2.0  | 0.8  | 1263 | 1.0 | 1.3 | 1.7  | AT5G02270 | ABC transporter family protein           |
| 52 | 264460_at   | 329  | 2.5 | 8.9  | 5.5  | 352  | 0.9 | 1.7 | 6.3  | AT1G10170 | expressed protein                        |
| 53 | 249063_at   | 3115 | 2.5 | 1.8  | 0.7  | 1044 | 1.0 | 1.1 | 1.0  | AT5G44110 | ABC transporter family protein           |
| 54 | 256816_at   | 275  | 2.5 | 2.0  | 1.1  | 257  | 1.1 | 1.7 | 2.1  | AT3G21400 | expressed protein                        |
| 55 | 257916_at   | 459  | 2.4 | 2.0  | 1.1  | 329  | 1.1 | 0.9 | 0.9  | AT3G23210 | bHLH protein                             |
| 56 | 251259_at   | 382  | 2.4 | 4.9  | 3.4  | 296  | 1.1 | 1.4 | 5.8  | AT3G62260 | protein phosphatase 2C (PP2C), putative  |
| 57 | 261663_at   | 1233 | 2.4 | 1.3  | 0.9  | 247  | 0.7 | 0.9 | 1.4  | AT1G18330 | myb family transcription factor          |
| 58 | 261648_at   | 217  | 2.4 | 21.5 | 34.1 | 159  | 1.2 | 2.1 | 13.0 | AT1G27730 | salt-tolerance zinc finger protein       |
| 59 | 250420_at   | 460  | 2.4 | 2.1  | 1.2  | 234  | 1.0 | 1.4 | 1.8  | AT5G11260 | bZIP protein HY5                         |
| 60 | 246481_s_at | 2567 | 2.4 | 1.7  | 0.9  | 3765 | 1.1 | 0.9 | 0.7  | AT5G15960 | stress-induced protein KIN1              |
| 61 | 258349_at   | 775  | 2.4 | 2.6  | 2.1  | 234  | 0.9 | 1.2 | 3.0  | AT3G17610 | bZIP family transcription factor         |
| 62 | 264436_at   | 1457 | 2.4 | 2.0  | 0.8  | 909  | 1.1 | 2.0 | 2.2  | AT1G10370 | glutathione transferase, putative        |
| 63 | 258167_at   | 4155 | 2.3 | 1.9  | 0.7  | 2252 | 1.2 | 1.5 | 1.5  | AT3G21560 | UDP-glucosyltransferase, putative        |
| 64 | 251725_at   | 175  | 2.3 | 2.0  | 0.6  | 202  | 1.2 | 1.1 | 1.3  | AT3G56260 | expressed protein                        |
| 65 | 254318_at   | 183  | 2.3 | 2.8  | 1.6  | 123  | 1.1 | 1.2 | 3.7  | AT4G22530 | expressed protein                        |
| 66 | 247946_at   | 1211 | 2.3 | 1.2  | 0.7  | 635  | 1.0 | 1.4 | 0.9  | AT5G57180 | CIA2 (CIA2)                              |
| 67 | 245936_at   | 758  | 2.3 | 2.2  | 1.4  | 532  | 1.0 | 1.2 | 1.6  | AT5G19850 | hydrolase, alpha/beta fold family        |
| 68 | 266097_at   | 2746 | 2.3 | 2.4  | 2.2  | 1190 | 1.3 | 1.8 | 4.0  | AT2G37970 | expressed protein                        |

|     |           |      |     |      |      |      |     |     |      |           |                                                                 |
|-----|-----------|------|-----|------|------|------|-----|-----|------|-----------|-----------------------------------------------------------------|
| 69  | 258315_at | 240  | 2.3 | 2.1  | 1.7  | 149  | 0.9 | 0.7 | 0.5  | AT3G16175 | thioesterase-related                                            |
| 70  | 260137_at | 2072 | 2.3 | 1.7  | 1.3  | 713  | 1.2 | 1.2 | 1.4  | AT1G66330 | expressed protein                                               |
| 71  | 256762_at | 89   | 2.3 | 4.2  | 1.9  | 76   | 1.1 | 1.3 | 3.9  | AT3G25655 | expressed protein                                               |
| 72  | 246966_at | 403  | 2.3 | 2.2  | 0.9  | 207  | 1.0 | 1.9 | 2.0  | AT5G24850 | DNA photolyase - like protein                                   |
| 73  | 259970_at | 1404 | 2.3 | 2.0  | 1.3  | 752  | 1.1 | 1.1 | 1.1  | AT1G76570 | light-harvesting chlorophyll a/b binding protein                |
| 74  | 263128_at | 2369 | 2.2 | 2.0  | 1.5  | 641  | 1.0 | 1.7 | 5.2  | AT1G78600 | CONSTANS B-box zinc finger family protein                       |
| 75  | 253061_at | 115  | 2.2 | 4.7  | 7.3  | 191  | 0.9 | 1.6 | 1.3  | AT4G37610 | expressed protein                                               |
| 76  | 266778_at | 296  | 2.2 | 2.1  | 1.1  | 197  | 1.0 | 1.2 | 0.6  | AT2G29090 | cytochrome p450 family                                          |
| 77  | 252010_at | 741  | 2.2 | 2.2  | 1.6  | 534  | 1.1 | 1.1 | 1.2  | AT3G52740 | expressed protein                                               |
| 78  | 254020_at | 3296 | 2.2 | 1.9  | 1.2  | 2886 | 1.1 | 0.8 | 0.5  | AT4G25700 | beta-carotene hydroxylase                                       |
| 79  | 248537_at | 736  | 2.2 | 1.8  | 1.3  | 288  | 1.2 | 1.9 | 2.5  | AT5G50100 | expressed protein                                               |
| 80  | 257746_at | 802  | 2.2 | 1.9  | 1.0  | 646  | 1.3 | 1.5 | 1.1  | AT3G29200 | chorismate mutase, chloroplast (CM1)                            |
| 81  | 245277_at | 667  | 2.2 | 2.8  | 3.0  | 415  | 1.1 | 1.6 | 2.2  | AT4G15550 | UDP-glucose:indole-3-acetate beta-D-glucosyltransferase (iaglu) |
| 82  | 249918_at | 1476 | 2.1 | 4.0  | 5.7  | 890  | 1.0 | 2.0 | 6.6  | AT5G19240 | expressed protein                                               |
| 83  | 263490_at | 312  | 2.1 | 2.1  | 1.8  | 226  | 1.3 | 1.4 | 1.4  | AT2G42620 | F-box protein (ORE9) (FBL7)                                     |
| 84  | 254874_at | 1967 | 2.1 | 2.0  | 1.7  | 929  | 1.2 | 1.6 | 2.5  | AT4G11570 | haloacid dehalogenase-like hydrolase family                     |
| 85  | 264752_at | 181  | 2.1 | 1.8  | 0.7  | 105  | 1.1 | 1.4 | 1.9  | AT1G23010 | multicopper oxidase, type 1 family                              |
| 86  | 264264_at | 318  | 2.1 | 2.3  | 1.8  | 266  | 1.0 | 0.7 | 0.8  | AT1G09250 | bHLH protein                                                    |
| 87  | 249777_at | 197  | 2.1 | 6.5  | 9.3  | 215  | 1.0 | 1.6 | 8.3  | AT5G24210 | lipase (class 3) family                                         |
| 88  | 246987_at | 1101 | 2.0 | 2.0  | 1.4  | 905  | 1.1 | 1.4 | 2.5  | AT5G67300 | myb family transcription factor                                 |
| 89  | 253263_at | 718  | 2.0 | 1.3  | 0.7  | 445  | 1.3 | 1.1 | 1.3  | AT4G34000 | abscisic acid responsive elements-binding factor(ABF3)          |
| 90  | 247351_at | 1258 | 2.0 | 3.6  | 3.4  | 1139 | 1.1 | 1.4 | 2.2  | AT5G63790 | No apical meristem (NAM) protein family                         |
| 91  | 248049_at | 484  | 2.0 | 1.8  | 1.0  | 298  | 1.4 | 2.7 | 3.7  | AT5G56090 | expressed protein                                               |
| 92  | 245329_at | 394  | 2.0 | 5.6  | 6.0  | 375  | 0.9 | 1.3 | 11.6 | AT4G14365 | expressed protein                                               |
| 93  | 251200_at | 303  | 2.0 | 2.4  | 1.5  | 312  | 0.9 | 1.8 | 3.1  | AT3G63010 | expressed protein                                               |
| 94  | 265634_at | 364  | 2.0 | 1.8  | 1.1  | 261  | 1.3 | 1.7 | 1.8  | AT2G25530 | expressed protein                                               |
| 95  | 261064_at | 697  | 2.0 | 1.8  | 1.3  | 578  | 1.0 | 1.5 | 2.6  | AT1G07510 | expressed protein                                               |
| 96  | 264102_at | 1582 | 2.0 | 1.7  | 0.8  | 423  | 1.4 | 2.1 | 3.4  | AT1G79270 | expressed protein                                               |
| 97  | 259979_at | 304  | 2.0 | 10.6 | 12.6 | 344  | 1.0 | 0.9 | 2.8  | AT1G76600 | expressed protein                                               |
| 98  | 246272_at | 1021 | 2.0 | 2.3  | 1.6  | 353  | 1.0 | 1.5 | 3.1  | AT4G37150 | hydrolase, alpha/beta fold family                               |
| 99  | 262473_at | 4588 | 2.0 | 1.8  | 1.3  | 3166 | 1.0 | 1.1 | 1.1  | AT1G50250 | chloroplast FtsH protease                                       |
| 100 | 265499_at | 237  | 2.0 | 3.6  | 2.9  | 161  | 0.8 | 1.5 | 6.6  | AT2G15480 | glucosyltransferase -related                                    |
| 101 | 258094_at | 2025 | 2.0 | 1.8  | 1.3  | 1160 | 1.0 | 1.4 | 1.4  | AT3G14690 | cytochrome P450, putative                                       |
| 102 | 255793_at | 994  | 2.0 | 1.6  | 1.2  | 384  | 1.3 | 1.5 | 1.0  | AT2G33250 | expressed protein                                               |
| 103 | 261607_at | 1083 | 2.0 | 1.7  | 1.3  | 1210 | 1.1 | 1.3 | 1.0  | AT1G49660 | expressed protein                                               |
| 104 | 266555_at | 326  | 2.0 | 1.9  | 1.5  | 95   | 1.1 | 1.4 | 4.2  | AT2G46270 | G-box binding bZIP transcription factor                         |
| 105 | 256819_at | 688  | 2.0 | 2.0  | 1.3  | 559  | 0.9 | 1.0 | 0.9  | AT3G21390 | mitochondrial carrier protein family                            |

|     |             |      |     |      |      |      |     |     |      |           |                                                                         |
|-----|-------------|------|-----|------|------|------|-----|-----|------|-----------|-------------------------------------------------------------------------|
| 106 | 262526_at   | 1253 | 2.0 | 1.9  | 1.3  | 864  | 1.0 | 1.0 | 0.9  | AT1G17050 | geranyl diphosphate synthase (GPPS)(dimethylallyltransferase), putative |
| 107 | 245895_at   | 435  | 2.0 | 1.8  | 0.9  | 289  | 1.1 | 1.3 | 1.2  | AT5G09230 | SIR2-family protein                                                     |
| 108 | 250926_at   | 1429 | 2.0 | 1.7  | 1.3  | 1123 | 1.1 | 0.9 | 0.8  | AT5G03555 | expressed protein                                                       |
| 109 | 249140_at   | 584  | 2.0 | 2.4  | 1.4  | 496  | 1.0 | 1.2 | 1.8  | AT5G43190 | F-box protein family, AtFBX6                                            |
| 110 | 259226_at   | 1155 | 2.0 | 1.8  | 1.1  | 633  | 1.0 | 1.4 | 1.8  | AT3G07700 | expressed protein                                                       |
| 111 | 262634_at   | 1110 | 1.9 | 1.7  | 1.1  | 1012 | 1.2 | 1.2 | 0.8  | AT1G06690 | aldo/keto reductase family                                              |
| 112 | 261319_at   | 620  | 1.9 | 2.1  | 1.6  | 498  | 1.3 | 1.3 | 1.0  | AT1G53090 | WD-40 repeat protein family                                             |
| 113 | 249983_at   | 429  | 1.9 | 4.0  | 4.3  | 297  | 0.9 | 2.1 | 8.5  | AT5G18470 | expressed protein                                                       |
| 114 | 266257_at   | 948  | 1.9 | 1.8  | 1.0  | 957  | 1.0 | 1.3 | 1.2  | AT2G27820 | prephenate dehydratase family                                           |
| 115 | 247214_at   | 1416 | 1.9 | 1.8  | 1.1  | 436  | 1.3 | 1.0 | 0.8  | AT5G64850 | expressed protein                                                       |
| 116 | 256066_at   | 200  | 1.9 | 1.6  | 1.0  | 198  | 0.7 | 0.8 | 0.4  | AT1G06980 | expressed protein                                                       |
| 117 | 253039_at   | 3510 | 1.9 | 1.4  | 0.8  | 1154 | 1.1 | 1.6 | 2.0  | AT4G37760 | squalene monooxygenase (squalene epoxidase) (SE), putative              |
| 118 | 258696_at   | 746  | 1.9 | 1.6  | 1.0  | 527  | 1.0 | 1.4 | 1.0  | AT3G09650 | pentatricopeptide (PPR) repeat-containing protein                       |
| 119 | 259479_at   | 326  | 1.9 | 12.4 | 20.9 | 235  | 0.7 | 1.2 | 20.6 | AT1G19020 | expressed protein                                                       |
| 120 | 256097_at   | 225  | 1.9 | 1.8  | 1.0  | 223  | 0.8 | 0.7 | 0.6  | AT1G13670 | expressed protein                                                       |
| 121 | 255594_at   | 841  | 1.8 | 2.0  | 1.3  | 524  | 1.0 | 1.5 | 2.6  | AT4G01660 | ABC transporter -related                                                |
| 122 | 261376_at   | 1454 | 1.8 | 1.5  | 0.9  | 989  | 1.1 | 1.6 | 2.0  | AT1G18660 | RING finger protein family                                              |
| 123 | 257176_s_at | 1486 | 1.8 | 1.6  | 0.6  | 764  | 0.9 | 1.2 | 1.8  | AT3G23510 | cyclopropane-fatty-acyl-phospholipid synthase -related                  |
| 124 | 260803_at   | 587  | 1.8 | 2.3  | 1.0  | 589  | 1.0 | 1.2 | 2.5  | AT1G78340 | glutathione transferase, putative                                       |
| 125 | 262635_at   | 1045 | 1.8 | 1.8  | 1.9  | 334  | 1.0 | 1.5 | 2.7  | AT1G06570 | 4-hydroxyphenylpyruvate dioxygenase (HPD)                               |
| 126 | 254759_at   | 1387 | 1.8 | 2.9  | 1.6  | 799  | 1.1 | 1.2 | 3.2  | AT4G13180 | short-chain dehydrogenase/reductase family protein                      |
| 127 | 256894_at   | 676  | 1.8 | 2.0  | 1.7  | 909  | 1.0 | 0.8 | 0.3  | AT3G21870 | cyclin family                                                           |
| 128 | 264655_at   | 2051 | 1.7 | 3.1  | 3.8  | 1567 | 1.1 | 1.2 | 3.4  | AT1G09070 | C2 domain-containing protein                                            |
| 129 | 259875_s_at | 2152 | 1.7 | 3.2  | 3.1  | 2290 | 1.1 | 1.4 | 2.0  | AT1G76690 | 12-oxophytodienoate reductase (OPR2)                                    |
| 130 | 262786_at   | 531  | 1.7 | 1.3  | 1.2  | 389  | 0.9 | 0.9 | 1.0  | AT1G10740 | lipase -related                                                         |
| 131 | 257212_at   | 795  | 1.7 | 1.4  | 0.9  | 589  | 1.0 | 1.4 | 1.5  | AT3G15090 | oxidoreductase, zinc-binding dehydrogenase family                       |
| 132 | 257932_at   | 865  | 1.7 | 1.4  | 1.1  | 405  | 1.3 | 1.3 | 1.4  | AT3G17040 | tetratricopeptide repeat (TPR)-containing protein                       |
| 133 | 260878_at   | 428  | 1.7 | 1.9  | 1.6  | 280  | 1.0 | 1.3 | 3.0  | AT1G21450 | scarecrow-like transcription factor 1 (SCL1)                            |
| 134 | 257253_at   | 3384 | 1.7 | 1.4  | 1.0  | 2640 | 1.0 | 1.3 | 1.0  | AT3G24190 | expressed protein                                                       |
| 135 | 249148_at   | 2825 | 1.7 | 1.9  | 1.5  | 2009 | 1.1 | 1.1 | 1.3  | AT5G43260 | expressed protein                                                       |
| 136 | 247013_at   | 589  | 1.6 | 1.3  | 0.9  | 1208 | 0.9 | 1.4 | 1.2  | AT5G67480 | expressed protein                                                       |
| 137 | 267138_s_at | 5039 | 1.6 | 1.6  | 1.0  | 5265 | 1.0 | 1.0 | 0.6  | AT2G38210 | SOR1 from the fungus <i>Cercospora nicotianae</i> -related              |
| 138 | 263556_at   | 750  | 1.6 | 1.2  | 0.9  | 394  | 1.2 | 1.4 | 1.8  | AT2G16350 | expressed protein                                                       |
| 139 | 258401_at   | 865  | 1.6 | 1.8  | 1.2  | 758  | 1.0 | 1.2 | 3.0  | AT3G15430 | expressed protein                                                       |
| 140 | 246954_at   | 2787 | 1.6 | 1.6  | 1.1  | 1902 | 1.1 | 1.3 | 1.7  | AT5G04830 | expressed protein                                                       |
| 141 | 258609_at   | 1712 | 1.6 | 1.2  | 0.9  | 1717 | 1.0 | 1.1 | 0.7  | AT3G02910 | expressed protein                                                       |

|            |             |      |     |     |     |      |     |     |     |           |                                                   |
|------------|-------------|------|-----|-----|-----|------|-----|-----|-----|-----------|---------------------------------------------------|
| <b>142</b> | 262832_s_at | 2755 | 1.5 | 1.9 | 2.1 | 2304 | 1.0 | 0.9 | 2.4 | AT1G14870 | expressed protein                                 |
| <b>143</b> | 251091_at   | 6977 | 1.5 | 1.3 | 1.1 | 5743 | 1.0 | 1.2 | 1.1 | AT5G01410 | pyridoxine biosynthesis protein - like            |
| <b>144</b> | 259965_at   | 6732 | 1.5 | 1.5 | 1.2 | 2910 | 1.4 | 1.7 | 1.9 | AT1G53670 | transcriptional regulator -related                |
| <b>145</b> | 259461_at   | 432  | 1.4 | 1.7 | 1.0 | 304  | 1.1 | 1.4 | 3.0 | AT1G18900 | pentatricopeptide (PPR) repeat-containing protein |

Fold induction for 305-1h is averaged from four independent ATH-1 array hybridizations, all others from two independent array hybridizations.  
Annotation June 15, 2003.
