# Supplementary material
Source: PubMed Central journal article supplement (PMC337064)
Supplement: pnas_0308044100_2.pdf [file pnas_0308044100_2.pdf]

**Table 2. 305\_1hr\_decrease**

|    | Probe set   | Expression level (327, 1h) | Fold induction |         |            | Expression level (327, quartz, 1h) | Fold induction |         |            | Identifier |                                                                   |
|----|-------------|----------------------------|----------------|---------|------------|------------------------------------|----------------|---------|------------|------------|-------------------------------------------------------------------|
|    |             |                            | 305, 1h        | 295, 1h | quartz, 1h |                                    | 305, 6h        | 295, 6h | quartz, 6h |            |                                                                   |
| 1  | 248676_at   | 595                        | 0.3            | 0.1     | 0.1        | 614                                | 1.2            | 1.1     | 0.3        | AT5G48850  | male sterility MS5 family                                         |
| 2  | 247600_at   | 758                        | 0.3            | 0.2     | 0.2        | 633                                | 1.0            | 0.8     | 0.4        | AT5G60890  | myb transcription factor homolog (ATR1)                           |
| 3  | 252965_at   | 894                        | 0.4            | 0.4     | 0.6        | 284                                | 1.0            | 0.7     | 0.3        | AT4G38860  | auxin-induced (indole-3-acetic acid induced) protein, putative    |
| 4  | 245668_at   | 372                        | 0.4            | 0.6     | 1.2        | 292                                | 0.9            | 0.9     | 0.8        | AT1G28330  | dormancy-associated protein -related                              |
| 5  | 266912_at   | 182                        | 0.4            | 0.3     | 0.4        | 174                                | 1.3            | 0.9     | 0.2        | AT2G45900  | expressed protein                                                 |
| 6  | 253317_at   | 439                        | 0.5            | 0.4     | 0.4        | 823                                | 1.1            | 0.8     | 0.3        | AT4G33960  | expressed protein                                                 |
| 7  | 266184_s_at | 867                        | 0.5            | 0.7     | 0.7        | 2061                               | 1.0            | 0.9     | 1.2        | AT2G38940  | phosphate transporter (AtPT2)                                     |
| 8  | 261895_at   | 1041                       | 0.5            | 0.7     | 0.9        | 1210                               | 1.0            | 0.7     | 0.5        | AT1G80830  | NRAMP metal ion transporter 1 (NRAMP1)                            |
| 9  | 259790_s_at | 384                        | 0.5            | 0.3     | 0.4        | 105                                | 0.8            | 0.5     | 0.2        | AT1G29430  | auxin-induced (indole-3-acetic acid induced) protein family       |
| 10 | 249008_at   | 956                        | 0.6            | 0.4     | 0.5        | 725                                | 0.9            | 0.7     | 0.4        | AT5G44680  | expressed protein                                                 |
| 11 | 251226_at   | 2161                       | 0.6            | 0.7     | 0.5        | 1785                               | 1.3            | 0.6     | 0.2        | AT3G62680  | proline-rich protein family                                       |
| 12 | 252972_at   | 2190                       | 0.6            | 0.4     | 0.5        | 1912                               | 0.9            | 0.6     | 0.2        | AT4G38840  | auxin-induced (indole-3-acetic acid induced) protein, putative    |
| 13 | 252833_at   | 723                        | 0.6            | 0.7     | 0.4        | 548                                | 1.3            | 0.6     | 0.2        | AT4G40090  | arabinogalactan-protein (AGP3)                                    |
| 14 | 262844_at   | 639                        | 0.6            | 0.6     | 0.8        | 544                                | 1.1            | 1.0     | 0.7        | AT1G14890  | pectinesterase family                                             |
| 15 | 267461_at   | 5382                       | 0.6            | 0.6     | 0.8        | 1063                               | 1.0            | 0.7     | 0.7        | AT2G33830  | auxin-regulated protein                                           |
| 16 | 247377_at   | 890                        | 0.6            | 0.6     | 1.0        | 2021                               | 1.0            | 0.7     | 0.3        | AT5G63180  | polysaccharide lyase family 1 (pectate lyase)                     |
| 17 | 260668_at   | 589                        | 0.6            | 0.5     | 0.6        | 117                                | 0.6            | 0.9     | 0.7        | AT1G19530  | expressed protein                                                 |
| 18 | 245602_at   | 682                        | 0.6            | 0.6     | 1.0        | 1002                               | 1.1            | 0.9     | 0.7        | AT4G14270  | expressed protein                                                 |
| 19 | 248801_at   | 378                        | 0.6            | 0.5     | 0.8        | 354                                | 1.0            | 1.0     | 1.2        | AT5G47370  | homeobox-leucine zipper protein HAT2 (HD-ZIP protein 2)           |
| 20 | 264348_at   | 2645                       | 0.6            | 0.5     | 0.5        | 3724                               | 0.9            | 0.7     | 0.5        | AT1G12110  | putative NPK1-related protein kinase 2                            |
| 21 | 264590_at   | 774                        | 0.6            | 0.7     | 0.9        | 727                                | 1.1            | 0.8     | 0.5        | AT2G17710  | expressed protein                                                 |
| 22 | 250054_at   | 510                        | 0.6            | 1.0     | 1.0        | 530                                | 1.2            | 1.5     | 3.5        | AT5G17860  | cation exchanger, putative (CAX7)                                 |
| 23 | 251221_at   | 1922                       | 0.6            | 1.1     | 2.3        | 5003                               | 0.9            | 1.0     | 0.4        | AT3G62550  | expressed protein                                                 |
| 24 | 265471_at   | 3093                       | 0.6            | 0.7     | 0.7        | 1068                               | 1.1            | 0.5     | 0.6        | AT2G37130  | peroxidase, putative (ATP2a)                                      |
| 25 | 260101_at   | 1695                       | 0.7            | 0.8     | 0.6        | 651                                | 1.1            | 1.0     | 0.9        | AT1G73260  | trypsin inhibitor -related                                        |
| 26 | 246390_at   | 3415                       | 0.7            | 0.6     | 0.5        | 2801                               | 1.2            | 1.0     | 0.5        | AT1G77330  | 1-aminocyclopropane-1-carboxylate oxidase (ACC oxidase), putative |
| 27 | 265444_s_at | 5385                       | 0.7            | 0.7     | 0.6        | 4280                               | 1.2            | 1.1     | 1.1        | AT2G37180  | plasma membrane intrinsic protein 2C                              |
| 28 | 259541_at   | 917                        | 0.7            | 0.6     | 0.7        | 757                                | 1.1            | 1.0     | 0.5        | AT1G20650  | protein kinase -related                                           |
| 29 | 255433_at   | 1536                       | 0.7            | 0.6     | 0.6        | 1695                               | 0.9            | 0.8     | 0.4        | AT4G03210  | xyloglucan endotransglycosylase, putative                         |

Fold induction for 305-1h is averaged from four independent ATH-1 array hybridizations, all others from two independent array hybridizations.

Annotation June 15, 2003.
