# Supplementary material
Source: PubMed Central journal article supplement (PMC337064)
Supplement: pnas_0308044100_3.pdf [file pnas_0308044100_3.pdf]

**Table 3. 295\_1hr\_increase**

|    | Probe set   | Fold induction             |         |         |            | Fold induction             |         |         |            | Identifier |                                                             |
|----|-------------|----------------------------|---------|---------|------------|----------------------------|---------|---------|------------|------------|-------------------------------------------------------------|
|    |             | Expression level (327, 1h) | 305, 1h | 295, 1h | quartz, 1h | Expression level (327, 1h) | 305, 6h | 295, 6h | quartz, 6h |            |                                                             |
| 1  | 253044_at   | 24                         | 3.3     | 96.8    | 131.9      | 7                          | 7.4     | 2.9     | 41.0       | AT4G37290  | expressed protein                                           |
| 2  | 251400_at   | 10                         | 2.2     | 77.0    | 123.4      | 82                         | 1.2     | 1.6     | 20.2       | AT3G60420  | expressed protein                                           |
| 3  | 248322_at   | 20                         | 1.2     | 68.9    | 159.8      | 20                         | 0.3     | 3.3     | 70.8       | AT5G52760  | heavy-metal-associated domain-containing protein            |
| 4  | 260040_at   | 3                          | 3.6     | 60.7    | 83.3       | 16                         | 2.5     | 2.3     | 25.7       | AT1G68765  | expressed protein                                           |
| 5  | 256442_at   | 3                          | 6.9     | 60.0    | 308.7      | 17                         | 0.7     | 6.2     | 40.1       | AT3G10930  | expressed protein                                           |
| 6  | 266800_at   | 35                         | 1.0     | 49.0    | 166.8      | 6                          | 1.4     | 1.1     | 47.4       | AT2G22880  | hypothetical protein                                        |
| 7  | 260522_x_at | 164                        | 6.9     | 47.7    | 47.2       | 157                        | 0.8     | 4.5     | 43.9       | AT2G41730  | expressed protein                                           |
| 8  | 249197_at   | 7                          | 1.6     | 44.1    | 97.9       | 9                          | 0.7     | 1.6     | 34.5       | AT5G42380  | calmodulin-related protein, putative                        |
| 9  | 245250_at   | 31                         | 1.6     | 41.4    | 57.6       | 19                         | 1.5     | 13.1    | 37.8       | AT4G17490  | ethylene responsive element binding factor (ERF6)           |
| 10 | 252131_at   | 98                         | 2.6     | 41.3    | 42.0       | 109                        | 0.7     | 1.9     | 31.4       | AT3G50930  | AAA-type ATPase family                                      |
| 11 | 265597_at   | 40                         | 2.0     | 39.5    | 60.1       | 52                         | 1.1     | 1.8     | 23.5       | AT2G20145  | disease resistance protein (TIR class), putative            |
| 12 | 262072_at   | 19                         | 5.6     | 36.3    | 41.6       | 12                         | 2.0     | 1.5     | 42.0       | AT1G59590  | expressed protein                                           |
| 13 | 266821_at   | 7                          | 1.9     | 35.6    | 90.2       | 20                         | 1.5     | 0.4     | 8.5        | AT2G44840  | ethylene response element binding protein (EREBP), putative |
| 14 | 260804_at   | 10                         | 1.5     | 32.3    | 57.6       | 17                         | 1.0     | 2.2     | 34.4       | AT1G78410  | expressed protein                                           |
| 15 | 259879_at   | 31                         | 1.4     | 31.0    | 41.1       | 43                         | 1.9     | 1.4     | 13.6       | AT1G76650  | calcium-binding EF-hand family protein                      |
| 16 | 258947_at   | 27                         | 1.1     | 30.3    | 65.9       | 16                         | 4.8     | 9.9     | 199.9      | AT3G01830  | calmodulin-related protein, putative                        |
| 17 | 264042_at   | 163                        | 5.4     | 30.3    | 25.7       | 157                        | 0.8     | 5.8     | 36.7       | AT2G03760  | steroid sulfotransferase, putative                          |
| 18 | 264866_at   | 23                         | 0.4     | 29.8    | 47.8       | 68                         | 1.1     | 0.6     | 7.9        | AT1G24140  | metallo proteinase -related                                 |
| 19 | 260023_at   | 83                         | 10.6    | 28.2    | 15.1       | 102                        | 1.5     | 1.5     | 4.0        | AT1G30040  | gibberellin 2-oxidase (GA2-oxidase) (ga2ox2)                |
| 20 | 261899_at   | 43                         | 2.0     | 28.2    | 106.7      | 16                         | 1.0     | 3.9     | 74.1       | AT1G80820  | cinnamoyl-CoA reductase, putative                           |
| 21 | 245082_at   | 18                         | 1.3     | 26.7    | 84.2       | 11                         | 5.3     | 8.3     | 75.2       | AT2G23270  | expressed protein                                           |
| 22 | 262213_at   | 21                         | 1.0     | 25.4    | 27.6       | 22                         | 2.6     | 1.0     | 64.5       | AT1G74870  | conserved hypothetical protein                              |
| 23 | 247145_at   | 5                          | 2.5     | 23.9    | 47.7       | 4                          | 2.1     | 0.8     | 70.3       | AT5G65600  | receptor protein kinase-related protein                     |
| 24 | 260399_at   | 15                         | 1.4     | 23.3    | 30.6       | 43                         | 0.1     | 0.7     | 2.8        | AT1G72520  | lipoxygenase (LOX), putative                                |
| 25 | 253046_at   | 83                         | 2.3     | 23.2    | 27.3       | 57                         | 1.3     | 4.2     | 60.8       | AT4G37370  | cytochrome P450, putative                                   |
| 26 | 258377_at   | 7                          | 4.7     | 23.1    | 30.0       | 25                         | 0.2     | 0.3     | 5.9        | AT3G17690  | cyclic nucleotide-binding transporter 2 (CNBT2/CNGC19)      |
| 27 | 261648_at   | 217                        | 2.4     | 21.5    | 34.1       | 159                        | 1.2     | 2.1     | 13.0       | AT1G27730  | salt-tolerance zinc finger protein                          |
| 28 | 266010_at   | 48                         | 2.0     | 21.4    | 51.2       | 60                         | 0.9     | 0.8     | 11.3       | AT2G37430  | C2H2-type zinc finger protein -related                      |
| 29 | 245755_at   | 35                         | 1.5     | 19.0    | 30.7       | 33                         | 1.5     | 1.0     | 11.4       | AT1G35210  | expressed protein                                           |
| 30 | 246405_at   | 6                          | 3.9     | 18.5    | 58.3       | 9                          | 2.2     | 7.9     | 270.8      | AT1G57630  | disease resistance protein (TIR class), putative            |
| 31 | 246821_at   | 45                         | 3.4     | 17.9    | 26.7       | 47                         | 1.5     | 1.9     | 22.7       | AT5G26920  | calmodulin-binding protein                                  |

|    |             |     |      |      |      |     |     |     |      |           |                                                      |
|----|-------------|-----|------|------|------|-----|-----|-----|------|-----------|------------------------------------------------------|
| 32 | 265725_at   | 38  | 2.5  | 17.7 | 27.3 | 21  | 3.0 | 5.2 | 42.5 | AT2G32030 | GCN5-related N-acetyltransferase (GNAT) family       |
| 33 | 247949_at   | 55  | 2.5  | 17.5 | 21.6 | 43  | 1.2 | 2.8 | 20.6 | AT5G57220 | cytochrome P450, putative                            |
| 34 | 253915_at   | 413 | 1.3  | 17.5 | 24.3 | 317 | 0.8 | 1.3 | 6.3  | AT4G27280 | calcium-binding EF-hand family protein               |
| 35 | 263231_at   | 108 | 3.2  | 17.2 | 14.9 | 166 | 0.8 | 4.2 | 20.0 | AT1G05680 | glycosyltransferase family                           |
| 36 | 254443_at   | 34  | 17.2 | 16.5 | 14.4 | 54  | 1.6 | 3.7 | 5.5  | AT4G21070 | BRCT domain-containing protein                       |
| 37 | 248164_at   | 91  | 1.4  | 16.5 | 30.6 | 127 | 0.7 | 0.7 | 5.3  | AT5G54490 | calcium-binding protein, putative                    |
| 38 | 246293_at   | 85  | 2.1  | 15.7 | 22.2 | 124 | 0.7 | 1.3 | 12.0 | AT3G56710 | SigA binding protein                                 |
| 39 | 255753_at   | 86  | 2.3  | 15.3 | 18.6 | 75  | 1.6 | 1.8 | 13.7 | AT1G18570 | myb family transcription factor                      |
| 40 | 251745_at   | 169 | 1.5  | 15.3 | 15.3 | 186 | 1.0 | 0.8 | 3.5  | AT3G55980 | expressed protein                                    |
| 41 | 245173_at   | 13  | 4.2  | 15.0 | 20.9 | 15  | 1.6 | 5.1 | 25.2 | AT2G47520 | AP2 domain transcription factor, putative            |
| 42 | 267028_at   | 395 | 1.9  | 14.9 | 14.9 | 346 | 1.1 | 1.1 | 9.6  | AT2G38470 | WRKY family transcription factor                     |
| 43 | 265668_at   | 140 | 4.3  | 14.8 | 15.4 | 127 | 1.1 | 1.3 | 7.9  | AT2G32020 | GCN5-related N-acetyltransferase (GNAT) family       |
| 44 | 264202_at   | 33  | 1.3  | 14.4 | 23.5 | 88  | 0.4 | 0.5 | 2.4  | AT1G22810 | AP2 domain transcription factor TINY, putative       |
| 45 | 257840_at   | 84  | 3.1  | 14.2 | 16.0 | 118 | 0.9 | 1.1 | 5.4  | AT3G25250 | protein kinase family                                |
| 46 | 249770_at   | 35  | 2.5  | 14.2 | 27.2 | 29  | 0.1 | 0.9 | 25.2 | AT5G24110 | WRKY family transcription factor                     |
| 47 | 266246_at   | 9   | 1.5  | 14.2 | 29.2 | 11  | 0.8 | 0.6 | 6.0  | AT2G27690 | cytochrome P450, putative                            |
| 48 | 253181_at   | 10  | 2.7  | 14.2 | 17.9 | 58  | 0.6 | 0.7 | 9.0  | AT4G35180 | amino acid transporter family                        |
| 49 | 263182_at   | 88  | 1.4  | 13.9 | 47.9 | 104 | 1.0 | 1.0 | 6.8  | AT1G05575 | expressed protein                                    |
| 50 | 257478_at   | 35  | 3.3  | 13.8 | 13.9 | 24  | 0.7 | 0.3 | 8.7  | AT1G16130 | WAK-like kinase (WLK)                                |
| 51 | 265200_s_at | 139 | 4.7  | 13.3 | 11.6 | 144 | 1.4 | 2.6 | 5.6  | AT2G36790 | glucosyl transferase -related                        |
| 52 | 253632_at   | 24  | 4.1  | 12.9 | 31.4 | 24  | 2.6 | 2.2 | 12.0 | AT4G30430 | senescence-associated protein family                 |
| 53 | 265709_at   | 34  | 2.5  | 12.8 | 12.2 | 7   | 0.7 | 1.1 | 2.3  | AT2G03540 | hypothetical protein                                 |
| 54 | 247543_at   | 101 | 1.5  | 12.7 | 15.0 | 79  | 1.1 | 2.2 | 3.7  | AT5G61600 | AP2 domain transcription factor, putative            |
| 55 | 259479_at   | 326 | 1.9  | 12.4 | 20.9 | 235 | 0.7 | 1.2 | 20.6 | AT1G19020 | expressed protein                                    |
| 56 | 247655_at   | 274 | 4.2  | 12.2 | 13.1 | 203 | 1.2 | 2.2 | 7.6  | AT5G59820 | zinc finger protein Zat12                            |
| 57 | 245041_at   | 179 | 1.2  | 11.9 | 17.7 | 159 | 0.9 | 0.9 | 7.5  | AT2G26530 | AR781, similar to yeast pheromone receptor           |
| 58 | 256833_at   | 22  | 1.1  | 11.8 | 9.2  | 10  | 4.3 | 5.8 | 61.2 | AT3G22910 | calcium-transporting ATPase (calcium pump), putative |
| 59 | 248448_at   | 120 | 1.1  | 11.7 | 18.7 | 85  | 0.8 | 1.1 | 2.2  | AT5G51190 | AP2 domain transcription factor, putative            |
| 60 | 262085_at   | 65  | 1.7  | 10.8 | 27.2 | 105 | 0.7 | 0.8 | 12.2 | AT1G56060 | hypothetical protein                                 |
| 61 | 262381_at   | 132 | 1.8  | 10.8 | 13.5 | 151 | 1.1 | 1.5 | 6.6  | AT1G72900 | disease resistance protein (TIR-NBS class), putative |
| 62 | 259979_at   | 304 | 2.0  | 10.6 | 12.6 | 344 | 1.0 | 0.9 | 2.8  | AT1G76600 | expressed protein                                    |
| 63 | 262382_at   | 30  | 0.9  | 10.5 | 19.3 | 102 | 0.5 | 1.4 | 1.4  | AT1G72920 | disease resistance protein (TIR-NBS class), putative |
| 64 | 260068_at   | 27  | 2.1  | 10.5 | 10.8 | 45  | 0.8 | 1.1 | 11.3 | AT1G73805 | calmodulin-binding protein                           |
| 65 | 249417_at   | 66  | 1.1  | 10.0 | 18.2 | 47  | 1.2 | 1.9 | 19.1 | AT5G39670 | calcium-binding EF-hand family protein               |
| 66 | 248327_at   | 123 | 1.4  | 9.9  | 16.7 | 132 | 0.7 | 1.2 | 9.4  | AT5G52750 | heavy-metal-associated domain-containing protein     |
| 67 | 265501_at   | 22  | 3.3  | 9.7  | 10.0 | 31  | 3.1 | 3.1 | 17.2 | AT2G15490 | glucosyltransferase -related                         |
| 68 | 254120_at   | 168 | 1.3  | 9.6  | 18.3 | 126 | 0.8 | 0.9 | 3.9  | AT4G24570 | mitochondrial carrier protein family                 |

|     |           |      |     |     |      |     |      |     |      |           |                                                                  |
|-----|-----------|------|-----|-----|------|-----|------|-----|------|-----------|------------------------------------------------------------------|
| 69  | 256306_at | 51   | 1.6 | 9.5 | 20.2 | 63  | 0.8  | 0.9 | 9.2  | AT1G30370 | lipase (class 3) family                                          |
| 70  | 246584_at | 177  | 2.8 | 9.5 | 8.0  | 180 | 0.8  | 1.0 | 2.8  | AT5G14730 | expressed protein                                                |
| 71  | 252483_at | 116  | 1.8 | 9.4 | 9.1  | 139 | 0.9  | 1.7 | 6.9  | AT3G46600 | scarecrow transcription factor family                            |
| 72  | 251774_at | 24   | 0.5 | 9.4 | 10.4 | 15  | 11.0 | 5.7 | 49.5 | AT3G55840 | nematode resistance protein-related protein                      |
| 73  | 252679_at | 53   | 0.6 | 9.4 | 16.3 | 70  | 1.1  | 1.4 | 3.1  | AT3G44260 | CCR4-associated factor 1-related protein                         |
| 74  | 248347_at | 275  | 6.5 | 9.3 | 4.6  | 118 | 1.0  | 1.4 | 2.5  | AT5G52250 | transducin / WD-40 repeat protein family                         |
| 75  | 264758_at | 53   | 3.0 | 9.3 | 17.5 | 35  | 0.5  | 1.2 | 12.5 | AT1G61340 | F-box protein family                                             |
| 76  | 264460_at | 329  | 2.5 | 8.9 | 5.5  | 352 | 0.9  | 1.7 | 6.3  | AT1G10170 | expressed protein                                                |
| 77  | 266832_at | 89   | 7.2 | 8.8 | 6.5  | 114 | 1.3  | 1.9 | 2.8  | AT2G30040 | protein kinase family                                            |
| 78  | 261892_at | 125  | 1.2 | 8.7 | 14.5 | 121 | 0.6  | 0.9 | 5.5  | AT1G80840 | WRKY family transcription factor                                 |
| 79  | 257919_at | 31   | 2.1 | 8.1 | 22.9 | 54  | 0.4  | 0.7 | 3.1  | AT3G23250 | myb family transcription factor(MYB15)                           |
| 80  | 260881_at | 67   | 2.0 | 8.1 | 11.9 | 47  | 0.9  | 4.5 | 23.7 | AT1G21550 | calcium-binding protein, putative                                |
| 81  | 251705_at | 71   | 1.4 | 8.0 | 14.4 | 92  | 1.0  | 1.4 | 29.8 | AT3G56400 | WRKY family transcription factor                                 |
| 82  | 253414_at | 402  | 1.4 | 7.9 | 8.2  | 317 | 0.9  | 1.8 | 11.4 | AT4G33050 | expressed protein                                                |
| 83  | 263783_at | 156  | 1.6 | 7.9 | 10.9 | 127 | 1.0  | 1.9 | 15.9 | AT2G46400 | WRKY family transcription factor                                 |
| 84  | 265197_at | 125  | 6.1 | 7.9 | 4.5  | 113 | 1.3  | 2.5 | 3.7  | AT2G36750 | UDP-glycosyltransferase family                                   |
| 85  | 245306_at | 2489 | 7.8 | 7.8 | 5.2  | 444 | 1.5  | 3.8 | 5.4  | AT4G14690 | expressed protein                                                |
| 86  | 254524_at | 32   | 2.8 | 7.7 | 7.1  | 27  | 2.3  | 1.2 | 7.3  | AT4G20000 | expressed protein                                                |
| 87  | 261192_at | 278  | 4.2 | 7.7 | 4.7  | 210 | 1.0  | 2.2 | 10.2 | AT1G32870 | NAM protein -related                                             |
| 88  | 259507_at | 119  | 1.7 | 7.5 | 7.4  | 234 | 0.9  | 2.6 | 19.4 | AT1G43910 | AAA-type ATPase family                                           |
| 89  | 252908_at | 56   | 0.9 | 7.5 | 11.7 | 47  | 1.3  | 2.9 | 33.4 | AT4G39670 | expressed protein                                                |
| 90  | 255884_at | 55   | 1.7 | 7.5 | 9.4  | 71  | 1.0  | 1.0 | 5.7  | AT1G20310 | expressed protein                                                |
| 91  | 263800_at | 85   | 1.3 | 7.4 | 10.2 | 107 | 1.0  | 1.4 | 2.4  | AT2G24600 | expressed protein                                                |
| 92  | 251336_at | 42   | 1.5 | 7.3 | 15.5 | 59  | 1.1  | 1.2 | 5.9  | AT3G61190 | BON1-associated protein 1 (BAP1)                                 |
| 93  | 263379_at | 418  | 1.2 | 7.2 | 7.0  | 436 | 1.2  | 1.3 | 3.6  | AT2G40140 | CCCH-type zinc finger protein -related                           |
| 94  | 262731_at | 17   | 1.7 | 7.1 | 8.9  | 23  | 0.7  | 0.9 | 5.5  | AT1G16420 | hypothetical protein common family                               |
| 95  | 253737_at | 29   | 1.1 | 7.0 | 21.5 | 38  | 3.1  | 0.9 | 7.9  | AT4G28703 | expressed protein                                                |
| 96  | 251282_at | 131  | 3.1 | 6.9 | 6.0  | 70  | 0.9  | 2.4 | 8.0  | AT3G61630 | AP2 domain transcription factor, putative                        |
| 97  | 246370_at | 43   | 2.1 | 6.8 | 13.8 | 83  | 1.0  | 1.4 | 10.5 | AT1G51920 | hypothetical protein                                             |
| 98  | 246777_at | 94   | 1.2 | 6.7 | 10.1 | 97  | 0.8  | 1.0 | 5.9  | AT5G27420 | RING-H2 zinc finger protein-related                              |
| 99  | 267623_at | 214  | 1.3 | 6.7 | 8.1  | 196 | 0.9  | 1.5 | 7.0  | AT2G39650 | expressed protein                                                |
| 100 | 249777_at | 197  | 2.1 | 6.5 | 9.3  | 215 | 1.0  | 1.6 | 8.3  | AT5G24210 | lipase (class 3) family                                          |
| 101 | 245731_at | 109  | 1.5 | 6.5 | 8.9  | 134 | 1.2  | 1.4 | 1.8  | AT1G73500 | mitogen-activated protein kinase kinase (MAPKK), putative (MKK9) |
| 102 | 260046_at | 99   | 1.9 | 6.4 | 7.6  | 103 | 0.9  | 1.1 | 8.4  | AT1G73800 | calmodulin-binding protein                                       |
| 103 | 253485_at | 231  | 1.3 | 6.4 | 5.0  | 208 | 0.8  | 1.2 | 7.7  | AT4G31800 | WRKY family transcription factor                                 |
| 104 | 254158_at | 272  | 1.4 | 6.3 | 9.2  | 338 | 1.0  | 1.0 | 2.9  | AT4G24380 | expressed protein                                                |
| 105 | 267083_at | 1812 | 2.0 | 6.3 | 7.6  | 777 | 1.1  | 2.2 | 11.4 | AT2G41100 | calmodulin-related protein 3, touch-induced (TCH3)               |

|     |             |     |     |     |      |     |     |     |      |           |                                                                      |
|-----|-------------|-----|-----|-----|------|-----|-----|-----|------|-----------|----------------------------------------------------------------------|
| 106 | 261033_at   | 63  | 1.2 | 6.2 | 8.5  | 19  | 4.2 | 1.3 | 12.6 | AT1G17380 | expressed protein                                                    |
| 107 | 248870_at   | 251 | 1.3 | 6.2 | 4.6  | 285 | 1.1 | 1.6 | 3.6  | AT5G46710 | expressed protein                                                    |
| 108 | 247215_at   | 24  | 2.8 | 6.0 | 23.5 | 65  | 1.2 | 0.9 | 5.0  | AT5G64905 | expressed protein                                                    |
| 109 | 258436_at   | 139 | 1.1 | 6.0 | 7.7  | 177 | 1.2 | 1.2 | 2.8  | AT3G16720 | RING zinc finger protein -related                                    |
| 110 | 254784_at   | 939 | 1.5 | 6.0 | 7.1  | 966 | 0.9 | 1.2 | 6.1  | AT4G12720 | MutT/nudix family protein                                            |
| 111 | 258682_at   | 206 | 1.0 | 5.9 | 6.8  | 188 | 1.3 | 2.1 | 6.9  | AT3G08720 | ribosomal-protein S6 kinase (ATPK19) -related                        |
| 112 | 266908_at   | 29  | 4.5 | 5.9 | 7.3  | 11  | 1.8 | 2.0 | 16.2 | AT2G34650 | protein kinase (PINOID/PID)                                          |
| 113 | 257262_at   | 331 | 5.9 | 5.8 | 3.2  | 140 | 0.8 | 0.7 | 1.2  | AT3G21890 | CONSTANS B-box zinc finger family protein                            |
| 114 | 260037_at   | 215 | 1.5 | 5.8 | 8.9  | 172 | 0.9 | 1.3 | 5.3  | AT1G68840 | AP2 domain protein RAP2.8 (RAV2)                                     |
| 115 | 248160_at   | 70  | 7.5 | 5.8 | 5.7  | 7   | 1.2 | 0.8 | 7.1  | AT5G54470 | CONSTANS B-box zinc finger family protein                            |
| 116 | 254241_at   | 70  | 2.2 | 5.8 | 5.4  | 85  | 1.2 | 0.8 | 5.5  | AT4G23190 | serine/threonine kinase - like protein                               |
| 117 | 250910_at   | 258 | 1.6 | 5.7 | 4.0  | 218 | 1.0 | 1.2 | 4.7  | AT5G03720 | heat shock transcription factor family                               |
| 118 | 256045_at   | 37  | 3.1 | 5.7 | 4.4  | 60  | 1.1 | 1.3 | 1.7  | AT1G07150 | protein kinase family                                                |
| 119 | 261193_at   | 756 | 0.9 | 5.7 | 9.8  | 807 | 1.1 | 1.4 | 3.3  | AT1G32920 | expressed protein                                                    |
| 120 | 249264_s_at | 94  | 2.0 | 5.6 | 3.5  | 52  | 0.9 | 1.1 | 3.3  | AT5G41740 | disease resistance protein (TIR-NBS-LRR class), putative             |
| 121 | 251054_at   | 182 | 1.8 | 5.6 | 6.1  | 152 | 0.7 | 0.8 | 5.2  | AT5G01540 | receptor lectin kinase, putative                                     |
| 122 | 245329_at   | 394 | 2.0 | 5.6 | 6.0  | 375 | 0.9 | 1.3 | 11.6 | AT4G14365 | expressed protein                                                    |
| 123 | 253643_at   | 92  | 1.3 | 5.5 | 9.9  | 97  | 0.9 | 0.9 | 5.0  | AT4G29780 | expressed protein                                                    |
| 124 | 262383_at   | 168 | 1.3 | 5.4 | 7.3  | 270 | 0.9 | 1.1 | 1.9  | AT1G72940 | disease resistance protein (TIR-NBS class), putative                 |
| 125 | 254926_at   | 263 | 0.9 | 5.3 | 6.5  | 262 | 0.8 | 1.0 | 5.7  | AT4G11280 | 1-aminocyclopropane-1-carboxylate synthase 6 (ACC synthase 6) (ACS6) |
| 126 | 258606_at   | 35  | 2.5 | 5.3 | 12.4 | 32  | 1.0 | 0.4 | 6.7  | AT3G02840 | expressed protein                                                    |
| 127 | 253827_at   | 50  | 1.1 | 5.3 | 9.6  | 62  | 0.9 | 0.4 | 1.7  | AT4G28085 | expressed protein                                                    |
| 128 | 256376_s_at | 59  | 2.2 | 5.3 | 5.9  | 62  | 0.8 | 0.9 | 8.5  | AT1G66690 | methyltransferase-related                                            |
| 129 | 254408_at   | 74  | 1.3 | 5.2 | 5.3  | 110 | 1.3 | 0.8 | 3.4  | AT4G21390 | serine/threonine kinase - like protein                               |
| 130 | 249747_at   | 49  | 1.9 | 5.1 | 5.7  | 77  | 0.7 | 0.9 | 1.4  | AT5G24600 | expressed protein                                                    |
| 131 | 255733_at   | 120 | 1.4 | 5.1 | 7.7  | 193 | 0.9 | 0.8 | 4.2  | AT1G25400 | expressed protein                                                    |
| 132 | 245560_at   | 282 | 6.1 | 5.1 | 1.7  | 53  | 1.9 | 2.7 | 3.7  | AT4G15480 | UDP-glycosyltransferase family                                       |
| 133 | 248799_at   | 97  | 1.7 | 5.0 | 6.9  | 115 | 1.1 | 1.2 | 1.6  | AT5G47230 | ethylene responsive element binding factor 5 (AtERF5)                |
| 134 | 247707_at   | 182 | 1.4 | 5.0 | 4.3  | 153 | 1.2 | 1.2 | 5.4  | AT5G59450 | scarecrow-like transcription factor 11 (SCL11)                       |
| 135 | 256356_s_at | 30  | 1.0 | 5.0 | 7.1  | 30  | 6.8 | 5.8 | 26.2 | AT1G66500 | expressed protein                                                    |
| 136 | 253796_at   | 64  | 1.7 | 5.0 | 9.6  | 57  | 0.9 | 1.1 | 14.6 | AT4G28460 | hypothetical protein                                                 |
| 137 | 266658_at   | 109 | 1.1 | 5.0 | 11.8 | 162 | 0.9 | 1.1 | 3.9  | AT2G25735 | expressed protein                                                    |
| 138 | 261021_at   | 73  | 1.8 | 5.0 | 7.2  | 52  | 1.1 | 3.5 | 36.5 | AT1G26380 | FAD-linked oxidoreductase family                                     |
| 139 | 265674_at   | 231 | 1.4 | 5.0 | 9.4  | 235 | 0.9 | 1.1 | 8.3  | AT2G32190 | expressed protein                                                    |
| 140 | 258203_at   | 70  | 1.3 | 5.0 | 4.1  | 20  | 5.4 | 4.7 | 33.1 | AT3G13950 | expressed protein                                                    |
| 141 | 248794_at   | 48  | 1.5 | 5.0 | 12.4 | 62  | 0.6 | 1.0 | 3.4  | AT5G47220 | ethylene responsive element binding factor 2 (EREBP-2)               |
| 142 | 260473_at   | 48  | 4.7 | 5.0 | 1.4  | 47  | 1.0 | 1.3 | 2.5  | AT1G10880 | expressed protein                                                    |

|     |             |      |     |     |      |      |     |      |       |           |                                                                                |
|-----|-------------|------|-----|-----|------|------|-----|------|-------|-----------|--------------------------------------------------------------------------------|
| 143 | 251259_at   | 382  | 2.4 | 4.9 | 3.4  | 296  | 1.1 | 1.4  | 5.8   | AT3G62260 | protein phosphatase 2C (PP2C), putative                                        |
| 144 | 260477_at   | 211  | 1.2 | 4.9 | 6.2  | 223  | 1.0 | 0.9  | 2.2   | AT1G11050 | protein kinase family                                                          |
| 145 | 255941_at   | 51   | 1.8 | 4.9 | 10.0 | 5    | 5.2 | 34.2 | 170.4 | AT1G20350 | mitochondrial inner membrane translocase component -related                    |
| 146 | 264363_at   | 27   | 1.4 | 4.9 | 6.1  | 17   | 2.1 | 0.5  | 2.8   | AT1G03170 | expressed protein                                                              |
| 147 | 257595_at   | 33   | 6.1 | 4.9 | 1.4  | 52   | 0.6 | 0.5  | 0.4   | AT3G24750 | hypothetical protein                                                           |
| 148 | 261470_at   | 163  | 1.1 | 4.8 | 11.0 | 131  | 1.1 | 1.1  | 3.6   | AT1G28370 | ethylene responsive element binding factor 11, putative (EREBP11)(ERF11)       |
| 149 | 258792_at   | 176  | 1.1 | 4.8 | 14.0 | 189  | 0.8 | 1.1  | 9.9   | AT3G04640 | glycine-rich protein                                                           |
| 150 | 264213_at   | 96   | 2.0 | 4.8 | 7.0  | 95   | 0.9 | 0.8  | 2.3   | AT1G65390 | disease resistance protein (TIR class), putative                               |
| 151 | 265075_at   | 867  | 2.0 | 4.8 | 5.1  | 813  | 1.2 | 1.1  | 4.5   | AT1G55450 | expressed protein                                                              |
| 152 | 259626_at   | 605  | 1.6 | 4.7 | 4.7  | 520  | 0.9 | 1.0  | 5.1   | AT1G42990 | bZIP family transcription factor                                               |
| 153 | 256633_at   | 160  | 0.8 | 4.7 | 8.2  | 130  | 1.2 | 0.8  | 5.2   | AT3G28340 | galactinol synthase, putative                                                  |
| 154 | 251507_at   | 167  | 1.4 | 4.7 | 6.9  | 135  | 0.9 | 1.0  | 3.0   | AT3G59080 | expressed protein                                                              |
| 155 | 262518_at   | 726  | 1.4 | 4.7 | 2.8  | 1255 | 1.0 | 3.1  | 5.4   | AT1G17170 | glutathione transferase, putative                                              |
| 156 | 253061_at   | 115  | 2.2 | 4.7 | 7.3  | 191  | 0.9 | 1.6  | 1.3   | AT4G37610 | expressed protein                                                              |
| 157 | 256183_at   | 174  | 1.1 | 4.6 | 6.1  | 192  | 1.0 | 1.0  | 4.9   | AT1G51660 | mitogen-activated protein kinase kinase (MAPKK), putative (MKK4)               |
| 158 | 265184_at   | 107  | 1.6 | 4.6 | 5.9  | 98   | 1.1 | 1.2  | 4.6   | AT1G23710 | expressed protein                                                              |
| 159 | 256426_at   | 60   | 1.6 | 4.6 | 3.7  | 91   | 1.0 | 1.5  | 5.9   | AT1G33420 | expressed protein                                                              |
| 160 | 267246_at   | 341  | 2.0 | 4.6 | 4.5  | 253  | 1.2 | 1.7  | 8.3   | AT2G30250 | WRKY family transcription factor                                               |
| 161 | 257751_at   | 127  | 1.1 | 4.6 | 7.9  | 214  | 0.8 | 0.6  | 2.4   | AT3G18690 | expressed protein                                                              |
| 162 | 267451_at   | 103  | 1.5 | 4.6 | 6.0  | 95   | 1.1 | 1.1  | 3.1   | AT2G33710 | AP2 domain transcription factor family                                         |
| 163 | 249928_at   | 114  | 0.8 | 4.6 | 8.6  | 160  | 0.8 | 0.7  | 2.4   | AT5G22250 | CCR4-associated factor-related protein                                         |
| 164 | 263584_at   | 115  | 1.0 | 4.5 | 5.0  | 125  | 1.0 | 0.9  | 3.6   | AT2G17040 | No apical meristem (NAM) protein family                                        |
| 165 | 256017_at   | 474  | 1.4 | 4.5 | 5.2  | 248  | 0.9 | 1.3  | 8.0   | AT1G19180 | expressed protein                                                              |
| 166 | 253832_at   | 31   | 1.3 | 4.5 | 14.7 | 24   | 2.6 | 2.0  | 3.1   | AT4G27654 | expressed protein                                                              |
| 167 | 247925_at   | 1283 | 1.2 | 4.5 | 5.3  | 725  | 0.9 | 1.1  | 2.7   | AT5G57560 | xyloglucan endotransglycosylase (TCH4)                                         |
| 168 | 267069_at   | 99   | 1.4 | 4.5 | 8.6  | 133  | 0.8 | 0.9  | 1.9   | AT2G41010 | expressed protein                                                              |
| 169 | 245252_at   | 52   | 1.2 | 4.5 | 8.5  | 61   | 1.0 | 1.5  | 4.1   | AT4G17500 | ethylene responsive element binding factor 1 (frameshift !)                    |
| 170 | 250781_at   | 458  | 4.3 | 4.5 | 2.6  | 228  | 1.0 | 1.6  | 6.6   | AT5G05410 | DRE binding protein (DREB2A)                                                   |
| 171 | 248981_at   | 155  | 1.2 | 4.4 | 3.6  | 157  | 1.2 | 1.7  | 4.5   | AT5G45110 | regulatory protein NPR1-related; transcription factor inhibitor I kappa B-like |
| 172 | 253859_at   | 75   | 3.0 | 4.4 | 5.9  | 87   | 1.9 | 1.3  | 2.2   | AT4G27657 | expressed protein                                                              |
| 173 | 253284_at   | 1101 | 1.5 | 4.4 | 5.1  | 907  | 1.1 | 1.2  | 2.9   | AT4G34150 | C2 domain-containing protein                                                   |
| 174 | 245662_at   | 94   | 0.7 | 4.3 | 5.0  | 90   | 1.2 | 2.0  | 6.5   | AT1G28190 | expressed protein                                                              |
| 175 | 249188_at   | 105  | 1.6 | 4.3 | 5.4  | 143  | 0.8 | 0.6  | 6.7   | AT5G42830 | hydroxycinnamoyl benzoyltransferase-related                                    |
| 176 | 265670_s_at | 328  | 1.1 | 4.3 | 8.3  | 280  | 0.9 | 1.3  | 7.8   | AT2G32210 | expressed protein                                                              |

|     |             |      |     |     |     |      |     |     |      |           |                                                                     |
|-----|-------------|------|-----|-----|-----|------|-----|-----|------|-----------|---------------------------------------------------------------------|
| 177 | 245866_s_at | 429  | 1.7 | 4.3 | 5.9 | 194  | 1.1 | 0.9 | 4.7  | AT1G57990 | purine permease-related                                             |
| 178 | 258752_at   | 101  | 1.8 | 4.3 | 3.3 | 51   | 0.9 | 1.9 | 9.5  | AT3G09520 | exocyst subunit EXO70 family                                        |
| 179 | 261443_at   | 94   | 2.0 | 4.3 | 9.1 | 138  | 0.7 | 1.0 | 6.0  | AT1G28480 | glutaredoxin protein family                                         |
| 180 | 250007_at   | 79   | 4.7 | 4.3 | 4.8 | 57   | 3.2 | 2.7 | 2.6  | AT5G18670 | glycosyl hydrolase family 14 (beta-amylase)                         |
| 181 | 249377_at   | 296  | 1.7 | 4.3 | 3.1 | 337  | 1.1 | 1.4 | 5.2  | AT5G40690 | expressed protein                                                   |
| 182 | 246099_at   | 840  | 1.6 | 4.3 | 5.7 | 288  | 0.9 | 3.3 | 12.2 | AT5G20230 | plastocyanin-like domain containing protein                         |
| 183 | 256762_at   | 89   | 2.3 | 4.2 | 1.9 | 76   | 1.1 | 1.3 | 3.9  | AT3G25655 | expressed protein                                                   |
| 184 | 261065_at   | 95   | 4.1 | 4.2 | 5.3 | 47   | 2.7 | 7.0 | 22.9 | AT1G07500 | hypothetical protein                                                |
| 185 | 248875_at   | 94   | 1.6 | 4.2 | 2.6 | 84   | 1.3 | 1.6 | 3.6  | AT5G46470 | disease resistance protein (TIR-NBS-LRR class), putative            |
| 186 | 260401_at   | 708  | 1.4 | 4.2 | 4.2 | 419  | 1.2 | 1.6 | 5.9  | AT1G69840 | expressed protein                                                   |
| 187 | 259992_at   | 339  | 1.1 | 4.2 | 3.6 | 253  | 1.0 | 1.2 | 5.5  | AT1G67970 | heat shock transcription factor 5 (HSF5)                            |
| 188 | 251176_at   | 80   | 1.3 | 4.2 | 4.2 | 106  | 1.0 | 2.9 | 32.6 | AT3G63380 | calcium-transporting ATPase (calcium pump), putative                |
| 189 | 253268_s_at | 726  | 1.7 | 4.2 | 2.7 | 992  | 1.0 | 1.9 | 4.2  | AT4G34135 | glucosyltransferase -related protein                                |
| 190 | 267357_at   | 173  | 1.4 | 4.2 | 7.5 | 77   | 1.3 | 2.2 | 5.9  | AT2G40000 | nematode-resistance protein -related                                |
| 191 | 251824_at   | 53   | 1.2 | 4.1 | 2.3 | 35   | 0.5 | 0.5 | 3.6  | AT3G55090 | ABC transporter family protein                                      |
| 192 | 253999_at   | 55   | 1.7 | 4.1 | 4.5 | 115  | 1.0 | 0.9 | 2.0  | AT4G26200 | 1-aminocyclopropane-1-carboxylate synthase (ACC synthase), putative |
| 193 | 250676_at   | 1505 | 1.2 | 4.1 | 5.9 | 1541 | 1.0 | 0.9 | 3.6  | AT5G06320 | harpin-induced protein 1 family (NDR1/HIN1-like protein 3)          |
| 194 | 246289_at   | 1138 | 1.3 | 4.1 | 6.3 | 1079 | 0.9 | 0.9 | 3.0  | AT3G56880 | expressed protein                                                   |
| 195 | 249983_at   | 429  | 1.9 | 4.0 | 4.3 | 297  | 0.9 | 2.1 | 8.5  | AT5G18470 | expressed protein                                                   |
| 196 | 250435_at   | 464  | 1.0 | 4.0 | 5.0 | 330  | 1.0 | 1.7 | 6.9  | AT5G10380 | C3HC4-type zinc finger protein family                               |
| 197 | 263475_at   | 110  | 0.9 | 4.0 | 9.2 | 161  | 0.8 | 0.6 | 1.1  | AT2G31945 | expressed protein                                                   |
| 198 | 249918_at   | 1476 | 2.1 | 4.0 | 5.7 | 890  | 1.0 | 2.0 | 6.6  | AT5G19240 | expressed protein                                                   |
| 199 | 255504_at   | 586  | 1.2 | 4.0 | 4.5 | 334  | 1.0 | 1.4 | 3.9  | AT4G02200 | drought-induced protein -related                                    |
| 200 | 258452_at   | 1943 | 2.2 | 4.0 | 3.1 | 1149 | 1.2 | 2.2 | 6.9  | AT3G22370 | alternative oxidase 1a, mitochondrial (AOX1A)                       |
| 201 | 263823_s_at | 169  | 2.2 | 4.0 | 2.9 | 147  | 1.0 | 1.6 | 5.1  | AT2G40350 | AP2 domain transcription factor, putative (DREB2)                   |
| 202 | 252136_at   | 53   | 1.6 | 4.0 | 5.4 | 87   | 1.0 | 4.7 | 29.3 | AT3G50770 | calmodulin-related protein, putative                                |
| 203 | 255881_at   | 274  | 3.8 | 4.0 | 1.6 | 247  | 1.1 | 0.9 | 0.8  | AT1G67070 | phosphomannose isomerase -related                                   |
| 204 | 256177_at   | 39   | 2.2 | 4.0 | 8.5 | 71   | 0.8 | 1.1 | 7.0  | AT1G51620 | protein kinase family                                               |
| 205 | 251884_at   | 40   | 1.7 | 4.0 | 7.0 | 64   | 0.8 | 1.3 | 5.7  | AT3G54150 | embryonic abundant protein -related                                 |
| 206 | 258786_at   | 535  | 1.4 | 4.0 | 4.8 | 474  | 0.9 | 1.0 | 5.3  | AT3G11820 | syntaxin of plants SYP121                                           |
| 207 | 259561_at   | 132  | 2.4 | 4.0 | 2.1 | 107  | 0.8 | 2.1 | 21.0 | AT1G21250 | wall-associated kinase 1                                            |
| 208 | 257022_at   | 159  | 1.5 | 4.0 | 4.2 | 174  | 0.8 | 0.8 | 3.7  | AT3G19580 | zinc finger protein -related                                        |
| 209 | 256793_at   | 207  | 1.4 | 3.9 | 6.2 | 265  | 0.9 | 0.9 | 5.6  | AT3G22160 | expressed protein                                                   |
| 210 | 251096_at   | 112  | 1.3 | 3.9 | 3.7 | 64   | 1.5 | 1.3 | 6.3  | AT5G01550 | receptor lectin kinase, putative                                    |
| 211 | 246270_at   | 909  | 0.9 | 3.9 | 5.8 | 1082 | 1.0 | 0.9 | 2.5  | AT4G36500 | expressed protein                                                   |
| 212 | 253305_at   | 591  | 2.5 | 3.9 | 3.6 | 937  | 1.3 | 1.7 | 2.6  | AT4G33666 | expressed protein                                                   |
| 213 | 261367_at   | 79   | 3.2 | 3.9 | 7.9 | 66   | 3.5 | 3.5 | 17.7 | AT1G53080 | protein kinase -related                                             |

|            |           |      |      |     |     |      |     |      |      |           |                                                            |
|------------|-----------|------|------|-----|-----|------|-----|------|------|-----------|------------------------------------------------------------|
| <b>214</b> | 245272_at | 73   | 1.2  | 3.8 | 3.4 | 60   | 1.0 | 0.9  | 2.6  | AT4G17250 | expressed protein                                          |
| <b>215</b> | 259076_at | 61   | 3.7  | 3.8 | 2.6 | 129  | 0.7 | 0.8  | 1.3  | AT3G02140 | expressed protein                                          |
| <b>216</b> | 261526_at | 179  | 1.3  | 3.8 | 4.6 | 195  | 1.0 | 1.0  | 3.7  | AT1G14370 | protein kinase (APK2a)                                     |
| <b>217</b> | 257081_at | 149  | 3.0  | 3.8 | 2.7 | 184  | 1.3 | 1.0  | 0.9  | AT3G30460 | C3HC4-type zinc finger protein family                      |
| <b>218</b> | 247125_at | 457  | 1.3  | 3.8 | 5.9 | 408  | 1.0 | 0.8  | 2.9  | AT5G66070 | C3HC4-type zinc finger protein family                      |
| <b>219</b> | 250098_at | 49   | 1.4  | 3.8 | 8.9 | 84   | 1.3 | 0.7  | 2.0  | AT5G17350 | expressed protein                                          |
| <b>220</b> | 245628_at | 75   | 3.1  | 3.8 | 1.5 | 490  | 1.6 | 1.9  | 0.6  | AT1G56650 | myb-related protein anthocyanin2, putative                 |
| <b>221</b> | 252334_at | 52   | 1.2  | 3.8 | 3.6 | 75   | 1.1 | 4.0  | 30.1 | AT3G48850 | mitochondrial phosphate transporter, putative              |
| <b>222</b> | 245119_at | 109  | 1.0  | 3.8 | 7.6 | 154  | 0.9 | 1.1  | 3.2  | AT2G41640 | expressed protein                                          |
| <b>223</b> | 258321_at | 3369 | 4.5  | 3.8 | 2.6 | 466  | 1.1 | 4.7  | 7.3  | AT3G22840 | early light-induced protein                                |
| <b>224</b> | 265892_at | 70   | 29.9 | 3.8 | 2.3 | 32   | 5.0 | 0.9  | 3.7  | AT2G15020 | expressed protein                                          |
| <b>225</b> | 261474_at | 75   | 2.6  | 3.8 | 5.2 | 73   | 0.7 | 0.7  | 6.0  | AT1G14540 | anionic peroxidase, putative                               |
| <b>226</b> | 262517_at | 282  | 1.6  | 3.7 | 2.3 | 443  | 1.0 | 3.1  | 8.1  | AT1G17180 | glutathione transferase, putative                          |
| <b>227</b> | 256181_at | 51   | 2.0  | 3.7 | 2.5 | 44   | 0.8 | 1.0  | 2.2  | AT1G51820 | leucine rich repeat protein kinase, putative               |
| <b>228</b> | 256046_at | 163  | 1.4  | 3.7 | 4.1 | 116  | 1.0 | 0.8  | 2.1  | AT1G07135 | glycine-rich protein                                       |
| <b>229</b> | 255543_at | 1163 | 1.4  | 3.7 | 3.0 | 839  | 0.9 | 2.0  | 6.9  | AT4G01870 | expressed protein                                          |
| <b>230</b> | 246858_at | 242  | 1.9  | 3.7 | 2.7 | 175  | 1.1 | 0.7  | 3.8  | AT5G25930 | receptor-related protein kinase - like                     |
| <b>231</b> | 254592_at | 217  | 1.2  | 3.7 | 4.6 | 200  | 1.1 | 1.5  | 6.4  | AT4G18880 | heat shock transcription factor 21                         |
| <b>232</b> | 264906_at | 168  | 2.6  | 3.7 | 2.3 | 177  | 0.8 | 1.3  | 3.5  | AT2G17270 | mitochondrial carrier protein family                       |
| <b>233</b> | 252592_at | 1137 | 0.9  | 3.7 | 4.5 | 877  | 1.0 | 0.9  | 1.6  | AT3G45640 | mitogen-activated protein kinase (MAPK), putative (MPK3)   |
| <b>234</b> | 267293_at | 1283 | 1.1  | 3.7 | 4.0 | 1329 | 1.1 | 1.1  | 2.7  | AT2G23810 | senescence-associated protein family                       |
| <b>235</b> | 266071_at | 71   | 1.1  | 3.7 | 7.1 | 76   | 1.0 | 3.2  | 40.6 | AT2G18680 | expressed protein                                          |
| <b>236</b> | 249618_at | 57   | 1.9  | 3.6 | 4.0 | 69   | 1.0 | 1.2  | 3.1  | AT5G37490 | expressed protein                                          |
| <b>237</b> | 265499_at | 237  | 2.0  | 3.6 | 2.9 | 161  | 0.8 | 1.5  | 6.6  | AT2G15480 | glucosyltransferase -related                               |
| <b>238</b> | 260656_at | 527  | 1.7  | 3.6 | 5.8 | 465  | 0.8 | 0.9  | 2.2  | AT1G19380 | expressed protein                                          |
| <b>239</b> | 259211_at | 57   | 1.1  | 3.6 | 4.8 | 24   | 2.5 | 2.1  | 16.9 | AT3G09020 | glycosyltransferase-related                                |
| <b>240</b> | 265460_at | 2742 | 0.8  | 3.6 | 3.5 | 2570 | 1.1 | 1.6  | 3.3  | AT2G46600 | calcium-binding protein, putative                          |
| <b>241</b> | 263919_at | 54   | 2.3  | 3.6 | 3.7 | 88   | 0.8 | 0.8  | 0.9  | AT2G36470 | expressed protein                                          |
| <b>242</b> | 251605_at | 170  | 4.2  | 3.6 | 1.5 | 159  | 1.2 | 0.8  | 0.4  | AT3G57830 | leucine-rich repeat transmembrane protein kinase, putative |
| <b>243</b> | 246108_at | 284  | 2.0  | 3.6 | 3.8 | 239  | 1.0 | 0.8  | 1.6  | AT5G28630 | glycine-rich protein                                       |
| <b>244</b> | 247351_at | 1258 | 2.0  | 3.6 | 3.4 | 1139 | 1.1 | 1.4  | 2.2  | AT5G63790 | No apical meristem (NAM) protein family                    |
| <b>245</b> | 254204_at | 777  | 1.5  | 3.6 | 3.1 | 749  | 1.0 | 1.0  | 2.2  | AT4G24160 | hydrolase, alpha/beta fold family                          |
| <b>246</b> | 249191_at | 706  | 3.4  | 3.6 | 2.1 | 962  | 1.0 | 0.7  | 0.4  | AT5G42760 | expressed protein                                          |
| <b>247</b> | 253824_at | 275  | 2.1  | 3.5 | 2.8 | 267  | 0.9 | 1.5  | 6.2  | AT4G27940 | mitochondrial carrier protein family                       |
| <b>248</b> | 263515_at | 128  | 1.7  | 3.5 | 2.8 | 95   | 1.3 | 14.3 | 33.6 | AT2G21640 | expressed protein                                          |
| <b>249</b> | 266618_at | 113  | 1.8  | 3.5 | 2.5 | 120  | 0.9 | 1.7  | 6.5  | AT2G35480 | expressed protein                                          |
| <b>250</b> | 251137_at | 230  | 3.3  | 3.5 | 2.4 | 110  | 1.2 | 1.6  | 2.6  | AT5G01300 | expressed protein                                          |

|            |             |      |     |     |     |      |     |     |      |           |                                                                                                                                                            |
|------------|-------------|------|-----|-----|-----|------|-----|-----|------|-----------|------------------------------------------------------------------------------------------------------------------------------------------------------------|
| <b>251</b> | 259312_at   | 383  | 1.1 | 3.4 | 4.7 | 427  | 1.1 | 1.4 | 4.3  | AT3G05200 | RING-H2 zinc finger protein ATL6 -related                                                                                                                  |
| <b>252</b> | 264232_at   | 315  | 1.0 | 3.4 | 4.4 | 372  | 1.1 | 0.9 | 2.3  | AT1G67470 | protein kinase family                                                                                                                                      |
| <b>253</b> | 259937_s_at | 420  | 1.1 | 3.4 | 3.4 | 332  | 1.1 | 2.6 | 7.3  | AT1G71330 | ABC transporter family protein                                                                                                                             |
| <b>254</b> | 254063_at   | 197  | 1.2 | 3.4 | 2.7 | 147  | 0.9 | 1.1 | 4.7  | AT4G25390 | protein kinase family                                                                                                                                      |
| <b>255</b> | 245711_at   | 217  | 1.3 | 3.4 | 4.5 | 145  | 1.3 | 1.6 | 4.2  | AT5G04340 | c2h2 zinc finger transcription factor -related                                                                                                             |
| <b>256</b> | 248845_at   | 214  | 1.4 | 3.4 | 3.3 | 168  | 1.4 | 1.4 | 3.3  | AT5G46480 | disease resistance protein (TIR class), putative                                                                                                           |
| <b>257</b> | 253377_at   | 690  | 1.6 | 3.4 | 2.8 | 562  | 1.1 | 1.3 | 3.6  | AT4G33300 | disease resistance protein (CC-NBS-LRR class), putative                                                                                                    |
| <b>258</b> | 247279_at   | 920  | 1.4 | 3.4 | 5.4 | 1038 | 0.8 | 0.6 | 2.2  | AT5G64310 | arabinogalactan-protein (AGP1)                                                                                                                             |
| <b>259</b> | 248596_at   | 185  | 3.5 | 3.4 | 0.7 | 495  | 1.1 | 1.4 | 0.5  | AT5G49330 | myb family transcription factor                                                                                                                            |
| <b>260</b> | 250829_at   | 469  | 1.1 | 3.4 | 3.1 | 447  | 1.0 | 1.4 | 4.2  | AT5G04720 | disease resistance protein (CC-NBS-LRR class), putative                                                                                                    |
| <b>261</b> | 249493_at   | 253  | 1.8 | 3.3 | 3.4 | 256  | 1.1 | 1.1 | 1.0  | AT5G39080 | transferase family                                                                                                                                         |
| <b>262</b> | 256366_at   | 238  | 1.2 | 3.3 | 3.7 | 245  | 1.0 | 1.1 | 9.2  | AT1G66880 | serine/threonine protein kinase family                                                                                                                     |
| <b>263</b> | 255502_at   | 303  | 1.3 | 3.3 | 2.9 | 194  | 0.9 | 1.1 | 4.8  | AT4G02410 | contains similarity to a protein kinase domain (Pfam: pkinase.hmm, score: 166.20) and to legume lectins beta domain (Pfam: lectin_legB.hmm, score: 139.32) |
| <b>264</b> | 249485_at   | 90   | 1.2 | 3.3 | 3.0 | 72   | 0.5 | 0.7 | 2.1  | AT5G39020 | protein kinase family                                                                                                                                      |
| <b>265</b> | 259297_at   | 72   | 1.6 | 3.3 | 2.6 | 94   | 1.4 | 2.1 | 12.3 | AT3G05360 | disease resistance protein family (LRR)                                                                                                                    |
| <b>266</b> | 254231_at   | 177  | 1.0 | 3.3 | 4.7 | 203  | 0.8 | 0.8 | 1.9  | AT4G23810 | WRKY family transcription factor                                                                                                                           |
| <b>267</b> | 267384_at   | 147  | 3.0 | 3.3 | 2.7 | 139  | 0.6 | 1.1 | 3.8  | AT2G44370 | CHP-rich zinc finger protein, putative                                                                                                                     |
| <b>268</b> | 252009_at   | 1208 | 1.4 | 3.3 | 4.5 | 882  | 1.1 | 1.2 | 2.8  | AT3G52800 | zinc finger - like protein                                                                                                                                 |
| <b>269</b> | 261450_s_at | 540  | 1.4 | 3.3 | 4.2 | 393  | 1.2 | 0.9 | 1.1  | AT1G21110 | O-methyltransferase 1, putative                                                                                                                            |
| <b>270</b> | 249494_at   | 358  | 2.0 | 3.3 | 2.4 | 337  | 1.1 | 2.3 | 8.9  | AT5G39050 | transferase family                                                                                                                                         |
| <b>271</b> | 263403_at   | 195  | 1.3 | 3.3 | 3.6 | 92   | 1.1 | 2.6 | 19.7 | AT2G04040 | MATE efflux protein family                                                                                                                                 |
| <b>272</b> | 252278_at   | 302  | 1.1 | 3.3 | 3.7 | 249  | 1.2 | 1.3 | 4.4  | AT3G49530 | No apical meristem (NAM) protein family                                                                                                                    |
| <b>273</b> | 265132_at   | 105  | 0.7 | 3.3 | 4.9 | 123  | 0.9 | 1.0 | 2.7  | AT1G23830 | expressed protein                                                                                                                                          |
| <b>274</b> | 258787_at   | 127  | 1.4 | 3.3 | 4.2 | 117  | 0.9 | 0.9 | 2.3  | AT3G11840 | expressed protein                                                                                                                                          |
| <b>275</b> | 266545_at   | 101  | 1.9 | 3.3 | 3.6 | 68   | 1.2 | 0.9 | 2.0  | AT2G35290 | expressed protein                                                                                                                                          |
| <b>276</b> | 260856_at   | 210  | 1.5 | 3.3 | 3.9 | 202  | 0.9 | 1.0 | 1.0  | AT1G21910 | transcription factor TINY family                                                                                                                           |
| <b>277</b> | 252474_at   | 534  | 1.3 | 3.3 | 3.1 | 427  | 0.8 | 1.0 | 2.6  | AT3G46620 | expressed protein                                                                                                                                          |
| <b>278</b> | 264434_at   | 90   | 1.9 | 3.3 | 4.3 | 69   | 1.1 | 0.7 | 8.9  | AT1G10340 | ankyrin repeat protein family                                                                                                                              |
| <b>279</b> | 246870_at   | 1319 | 1.6 | 3.3 | 3.2 | 1088 | 0.9 | 1.1 | 2.7  | AT5G26030 | ferrochelataase-I                                                                                                                                          |
| <b>280</b> | 249622_at   | 159  | 2.2 | 3.3 | 2.8 | 114  | 1.9 | 1.7 | 2.4  | AT5G37550 | expressed protein                                                                                                                                          |
| <b>281</b> | 261027_at   | 98   | 1.6 | 3.3 | 2.7 | 139  | 0.8 | 1.5 | 6.8  | AT1G01340 | cyclic nucleotide-regulated ion channel (CNGC10/ACBK1)                                                                                                     |
| <b>282</b> | 262092_at   | 63   | 1.9 | 3.3 | 4.1 | 130  | 1.2 | 1.3 | 1.5  | AT1G56150 | auxin-induced (indole-3-acetic acid induced) protein family                                                                                                |
| <b>283</b> | 259792_at   | 301  | 1.4 | 3.2 | 3.4 | 208  | 1.0 | 1.0 | 4.0  | AT1G29690 | expressed protein                                                                                                                                          |
| <b>284</b> | 261063_at   | 103  | 1.3 | 3.2 | 4.2 | 107  | 1.4 | 1.6 | 6.3  | AT1G07520 | scarecrow transcription factor family                                                                                                                      |
| <b>285</b> | 266083_at   | 38   | 1.1 | 3.2 | 2.5 | 84   | 0.8 | 0.4 | 0.8  | AT2G37820 | CHP-rich zinc finger protein, putative                                                                                                                     |
| <b>286</b> | 259977_at   | 227  | 2.1 | 3.2 | 1.8 | 301  | 1.0 | 1.4 | 2.4  | AT1G76590 | expressed protein                                                                                                                                          |



|            |             |      |     |     |     |      |     |     |      |           |                                                            |
|------------|-------------|------|-----|-----|-----|------|-----|-----|------|-----------|------------------------------------------------------------|
| <b>287</b> | 259875_s_at | 2152 | 1.7 | 3.2 | 3.1 | 2290 | 1.1 | 1.4 | 2.0  | AT1G76690 | 12-oxophytodienoate reductase (OPR2)                       |
| <b>288</b> | 260015_at   | 47   | 2.0 | 3.2 | 3.6 | 55   | 1.1 | 0.9 | 4.6  | AT1G67980 | caffeoyl-CoA 3-O-methyltransferase, putative               |
| <b>289</b> | 262374_s_at | 686  | 1.6 | 3.2 | 4.0 | 846  | 1.1 | 1.2 | 2.1  | AT1G72930 | disease resistance protein (TIR class), putative           |
| <b>290</b> | 248230_at   | 59   | 0.8 | 3.2 | 7.2 | 127  | 0.7 | 0.6 | 1.6  | AT5G53830 | expressed protein                                          |
| <b>291</b> | 260225_at   | 79   | 4.9 | 3.2 | 3.4 | 84   | 0.8 | 1.0 | 7.9  | AT1G74590 | glutathione transferase, putative                          |
| <b>292</b> | 250289_at   | 1688 | 1.5 | 3.1 | 4.0 | 1299 | 1.0 | 1.2 | 4.4  | AT5G13190 | expressed protein                                          |
| <b>293</b> | 247071_at   | 64   | 1.1 | 3.1 | 5.2 | 27   | 1.4 | 1.4 | 17.3 | AT5G66640 | expressed protein                                          |
| <b>294</b> | 266606_at   | 96   | 2.0 | 3.1 | 3.2 | 29   | 2.8 | 3.0 | 10.5 | AT2G46310 | AP2 domain transcription factor, putative                  |
| <b>295</b> | 252977_at   | 42   | 2.6 | 3.1 | 4.4 | 19   | 2.6 | 2.0 | 20.9 | AT4G38560 | Phospholipase like protein                                 |
| <b>296</b> | 264655_at   | 2051 | 1.7 | 3.1 | 3.8 | 1567 | 1.1 | 1.2 | 3.4  | AT1G09070 | C2 domain-containing protein                               |
| <b>297</b> | 252053_at   | 405  | 1.1 | 3.1 | 3.6 | 315  | 1.0 | 0.9 | 2.9  | AT3G52400 | syntaxin of plants SYP122                                  |
| <b>298</b> | 255742_at   | 243  | 1.4 | 3.1 | 2.9 | 322  | 1.2 | 2.0 | 4.4  | AT1G25560 | AP2 domain transcription factor, putative                  |
| <b>299</b> | 261476_at   | 78   | 1.4 | 3.1 | 4.4 | 65   | 1.6 | 1.6 | 1.9  | AT1G14480 | expressed protein                                          |
| <b>300</b> | 259033_at   | 146  | 1.3 | 3.1 | 5.0 | 147  | 1.1 | 1.5 | 14.0 | AT3G09410 | pectinacetyltransferase family                             |
| <b>301</b> | 264746_at   | 378  | 1.6 | 3.1 | 2.0 | 422  | 1.2 | 1.1 | 5.1  | AT1G62300 | WRKY family transcription factor                           |
| <b>302</b> | 251035_at   | 65   | 2.2 | 3.1 | 3.1 | 68   | 0.8 | 1.3 | 2.9  | AT5G02220 | expressed protein                                          |
| <b>303</b> | 259432_at   | 41   | 9.2 | 3.1 | 0.9 | 46   | 0.7 | 0.1 | 0.3  | AT1G01520 | myb family transcription factor                            |
| <b>304</b> | 266072_at   | 350  | 1.5 | 3.1 | 4.9 | 142  | 1.1 | 1.3 | 8.4  | AT2G18700 | glycosyltransferase family 20                              |
| <b>305</b> | 253628_at   | 1020 | 1.8 | 3.1 | 3.4 | 561  | 1.3 | 0.6 | 3.2  | AT4G30280 | xyloglucan endotransglycosylase, putative                  |
| <b>306</b> | 246018_at   | 234  | 0.9 | 3.1 | 8.0 | 148  | 1.2 | 1.1 | 9.6  | AT5G10695 | expressed protein                                          |
| <b>307</b> | 260239_at   | 110  | 1.2 | 3.1 | 3.0 | 72   | 1.2 | 1.5 | 10.3 | AT1G74360 | leucine-rich repeat transmembrane protein kinase, putative |
| <b>308</b> | 253496_at   | 1307 | 3.5 | 3.0 | 2.0 | 425  | 1.7 | 3.0 | 2.9  | AT4G31870 | glutathione peroxidase, putative                           |
| <b>309</b> | 260648_at   | 74   | 1.8 | 3.0 | 3.5 | 85   | 0.9 | 1.8 | 15.3 | AT1G08050 | C3HC4-type zinc finger protein family                      |
| <b>310</b> | 261876_at   | 79   | 2.3 | 3.0 | 3.0 | 71   | 1.3 | 0.7 | 0.7  | AT1G50590 | pirin-like protein                                         |
| <b>311</b> | 257206_at   | 879  | 1.9 | 3.0 | 2.8 | 709  | 1.4 | 2.9 | 6.1  | AT3G16530 | lectin -related                                            |
| <b>312</b> | 264868_at   | 54   | 1.6 | 3.0 | 2.6 | 59   | 1.3 | 3.7 | 17.0 | AT1G24090 | RNase H domain-containing protein                          |
| <b>313</b> | 245193_at   | 250  | 1.8 | 3.0 | 3.0 | 249  | 1.0 | 1.4 | 3.3  | AT1G67810 | F12A21.6                                                   |
| <b>314</b> | 253830_at   | 196  | 1.5 | 3.0 | 4.5 | 184  | 1.1 | 0.9 | 2.4  | AT4G27652 | expressed protein                                          |
| <b>315</b> | 245392_at   | 136  | 2.1 | 3.0 | 3.9 | 216  | 0.8 | 0.9 | 0.6  | AT4G15680 | glutaredoxin protein family                                |
| <b>316</b> | 256891_at   | 676  | 1.3 | 3.0 | 4.8 | 1950 | 1.0 | 1.0 | 0.8  | AT3G19030 | expressed protein                                          |
| <b>317</b> | 245038_at   | 315  | 1.1 | 3.0 | 4.7 | 183  | 0.8 | 1.0 | 8.3  | AT2G26560 | patatin, putative                                          |
| <b>318</b> | 255011_at   | 903  | 2.3 | 3.0 | 2.4 | 509  | 1.1 | 2.5 | 5.0  | AT4G10040 | cytochrome c                                               |
| <b>319</b> | 245247_at   | 463  | 1.0 | 3.0 | 3.0 | 355  | 1.2 | 1.3 | 4.5  | AT4G17230 | scarecrow-like transcription factor 13 (SCL13)             |
| <b>320</b> | 245765_at   | 1006 | 1.7 | 3.0 | 2.9 | 557  | 0.9 | 0.9 | 3.2  | AT1G33600 | leucine rich repeat protein family                         |
| <b>321</b> | 260411_at   | 227  | 1.2 | 3.0 | 4.6 | 238  | 1.0 | 1.0 | 1.7  | AT1G69890 | expressed protein                                          |
| <b>322</b> | 264636_at   | 777  | 1.6 | 3.0 | 4.3 | 1049 | 0.8 | 0.8 | 1.2  | AT1G65490 | expressed protein                                          |
| <b>323</b> | 247431_at   | 77   | 2.2 | 3.0 | 1.9 | 88   | 0.5 | 1.0 | 10.0 | AT5G62520 | expressed protein                                          |

|            |           |      |     |     |     |      |     |     |      |           |                                                                                           |
|------------|-----------|------|-----|-----|-----|------|-----|-----|------|-----------|-------------------------------------------------------------------------------------------|
| <b>324</b> | 262705_at | 339  | 2.7 | 3.0 | 2.2 | 284  | 0.7 | 0.8 | 1.5  | AT1G16260 | wall-associated kinase -related                                                           |
| <b>325</b> | 248606_at | 175  | 1.5 | 3.0 | 5.8 | 161  | 1.2 | 1.2 | 1.6  | AT5G49450 | bZIP family transcription factor                                                          |
| <b>326</b> | 248686_at | 991  | 1.6 | 3.0 | 3.4 | 253  | 1.1 | 2.8 | 9.3  | AT5G48540 | 33 kDa secretory protein-related                                                          |
| <b>327</b> | 258275_at | 127  | 1.0 | 3.0 | 3.7 | 116  | 0.8 | 0.7 | 1.9  | AT3G15760 | expressed protein                                                                         |
| <b>328</b> | 246253_at | 185  | 1.2 | 2.9 | 3.3 | 283  | 0.9 | 1.1 | 1.6  | AT4G37260 | myb DNA-binding protein (AtMYB73)                                                         |
| <b>329</b> | 251640_at | 922  | 1.0 | 2.9 | 4.7 | 888  | 0.9 | 0.9 | 1.8  | AT3G57450 | expressed protein                                                                         |
| <b>330</b> | 266371_at | 1590 | 0.9 | 2.9 | 3.2 | 1612 | 1.0 | 1.7 | 4.8  | AT2G41410 | calmodulin, putative                                                                      |
| <b>331</b> | 264867_at | 84   | 1.2 | 2.9 | 2.7 | 105  | 1.2 | 0.8 | 3.3  | AT1G24150 | formin homology 2 (FH2) domain-containing protein                                         |
| <b>332</b> | 249769_at | 1482 | 4.3 | 2.9 | 1.6 | 291  | 0.9 | 1.4 | 3.1  | AT5G24120 | sigma-related factor (emb CAA77213.1)                                                     |
| <b>333</b> | 260784_at | 415  | 4.1 | 2.9 | 0.9 | 274  | 1.0 | 1.1 | 1.0  | AT1G06180 | myb family transcription factor                                                           |
| <b>334</b> | 246468_at | 1946 | 2.7 | 2.9 | 1.4 | 1043 | 1.3 | 1.7 | 1.7  | AT5G17050 | glycosyltransferase family                                                                |
| <b>335</b> | 247435_at | 296  | 1.5 | 2.9 | 1.9 | 254  | 1.3 | 1.8 | 7.9  | AT5G62480 | glutathione transferase, putative                                                         |
| <b>336</b> | 252045_at | 221  | 1.7 | 2.9 | 2.5 | 178  | 1.1 | 1.1 | 2.5  | AT3G52450 | expressed protein                                                                         |
| <b>337</b> | 257053_at | 238  | 1.1 | 2.9 | 4.9 | 301  | 1.6 | 1.2 | 2.7  | AT3G15210 | ethylene responsive element binding factor 4 (ERF4)                                       |
| <b>338</b> | 250449_at | 187  | 1.8 | 2.9 | 3.4 | 214  | 1.1 | 0.6 | 1.0  | AT5G10830 | embryonic abundant protein -related                                                       |
| <b>339</b> | 251281_at | 146  | 0.9 | 2.9 | 3.5 | 131  | 1.1 | 0.8 | 2.0  | AT3G61640 | arabinogalactan-protein (AGP20)                                                           |
| <b>340</b> | 254759_at | 1387 | 1.8 | 2.9 | 1.6 | 799  | 1.1 | 1.2 | 3.2  | AT4G13180 | short-chain dehydrogenase/reductase family protein                                        |
| <b>341</b> | 250099_at | 73   | 2.0 | 2.9 | 3.2 | 87   | 0.7 | 1.0 | 1.2  | AT5G17300 | expressed protein                                                                         |
| <b>342</b> | 248434_at | 450  | 2.2 | 2.9 | 1.7 | 157  | 1.0 | 5.5 | 15.7 | AT5G51440 | heat shock protein, putative                                                              |
| <b>343</b> | 266017_at | 320  | 1.6 | 2.9 | 3.0 | 166  | 1.0 | 1.8 | 11.0 | AT2G18690 | expressed protein                                                                         |
| <b>344</b> | 257536_at | 59   | 1.2 | 2.9 | 7.5 | 70   | 0.7 | 1.2 | 3.4  | AT3G02800 | expressed protein                                                                         |
| <b>345</b> | 254694_at | 577  | 1.1 | 2.9 | 3.1 | 688  | 1.3 | 1.2 | 2.6  | AT4G17900 | expressed protein                                                                         |
| <b>346</b> | 253819_at | 36   | 0.9 | 2.9 | 3.9 | 65   | 0.8 | 0.4 | 1.9  | AT4G28350 | receptor protein kinase like protein                                                      |
| <b>347</b> | 256425_at | 324  | 1.4 | 2.8 | 2.2 | 348  | 0.9 | 1.3 | 3.0  | AT1G33560 | disease resistance protein (CC-NBS-LRR class), putative                                   |
| <b>348</b> | 261143_at | 895  | 1.1 | 2.8 | 4.8 | 931  | 1.1 | 1.0 | 1.8  | AT1G19770 | purine permease-related                                                                   |
| <b>349</b> | 263948_at | 96   | 1.0 | 2.8 | 3.7 | 54   | 1.9 | 1.8 | 9.1  | AT2G35980 | harpin-induced protein 1 family (HIN1)                                                    |
| <b>350</b> | 260915_at | 110  | 1.6 | 2.8 | 3.2 | 69   | 1.5 | 1.1 | 3.4  | AT1G02660 | lipase (class 3) family                                                                   |
| <b>351</b> | 251895_at | 464  | 2.2 | 2.8 | 2.5 | 312  | 1.2 | 1.9 | 6.9  | AT3G54420 | glycosyl hydrolase family 19 (class IV chitinase)                                         |
| <b>352</b> | 248205_at | 66   | 2.9 | 2.8 | 2.0 | 47   | 0.7 | 1.2 | 3.8  | AT5G54300 | cotton fiber expressed protein 1-related protein                                          |
| <b>353</b> | 254917_at | 80   | 1.9 | 2.8 | 2.0 | 44   | 1.3 | 1.3 | 4.0  | AT4G11350 | fringe-related protein                                                                    |
| <b>354</b> | 245277_at | 667  | 2.2 | 2.8 | 3.0 | 415  | 1.1 | 1.6 | 2.2  | AT4G15550 | UDP-glucose:indole-3-acetate beta-D-glucosyltransferase (iaglu)                           |
| <b>355</b> | 265665_at | 279  | 3.1 | 2.8 | 1.0 | 298  | 0.9 | 0.3 | 0.3  | AT2G27420 | cysteine proteinase                                                                       |
| <b>356</b> | 254318_at | 183  | 2.3 | 2.8 | 1.6 | 123  | 1.1 | 1.2 | 3.7  | AT4G22530 | expressed protein                                                                         |
| <b>357</b> | 249237_at | 2072 | 1.5 | 2.8 | 2.7 | 1559 | 1.0 | 1.3 | 4.2  | AT5G42050 | expressed protein                                                                         |
| <b>358</b> | 261650_at | 692  | 1.5 | 2.8 | 2.6 | 603  | 0.9 | 1.0 | 3.2  | AT1G27770 | calcium-transporting ATPase 1, plasma membrane-type (Ca <sup>2+</sup> -ATPase, isoform 1) |
| <b>359</b> | 251636_at | 652  | 1.3 | 2.8 | 2.8 | 519  | 1.2 | 1.2 | 3.2  | AT3G57530 | calcium-dependent protein kinase, putative (CDPK)                                         |

|            |             |     |     |     |     |     |     |     |      |           |                                                            |
|------------|-------------|-----|-----|-----|-----|-----|-----|-----|------|-----------|------------------------------------------------------------|
| <b>360</b> | 267381_at   | 382 | 1.1 | 2.8 | 2.7 | 348 | 1.0 | 1.0 | 2.0  | AT2G26190 | expressed protein                                          |
| <b>361</b> | 258683_at   | 174 | 1.1 | 2.8 | 2.6 | 238 | 0.9 | 0.8 | 2.0  | AT3G08760 | protein kinase family                                      |
| <b>362</b> | 254289_at   | 63  | 1.8 | 2.8 | 2.5 | 78  | 1.5 | 1.3 | 4.9  | AT4G22980 | hypothetical protein                                       |
| <b>363</b> | 258262_at   | 162 | 1.2 | 2.8 | 4.1 | 101 | 1.2 | 1.4 | 3.8  | AT3G15770 | expressed protein                                          |
| <b>364</b> | 256185_at   | 375 | 1.1 | 2.8 | 4.1 | 492 | 1.0 | 0.7 | 1.5  | AT1G51700 | Dof zinc finger protein                                    |
| <b>365</b> | 260275_at   | 54  | 1.4 | 2.8 | 4.1 | 23  | 3.4 | 2.4 | 4.9  | AT1G80610 | expressed protein                                          |
| <b>366</b> | 258507_at   | 376 | 1.6 | 2.8 | 2.3 | 296 | 1.0 | 1.9 | 4.6  | AT3G06500 | neutral invertase -related                                 |
| <b>367</b> | 248668_at   | 162 | 3.0 | 2.8 | 2.1 | 151 | 1.5 | 3.2 | 5.7  | AT5G48720 | hypothetical protein                                       |
| <b>368</b> | 255430_at   | 367 | 1.5 | 2.8 | 2.2 | 290 | 0.9 | 4.1 | 12.7 | AT4G03320 | chloroplast protein import component -related              |
| <b>369</b> | 257644_at   | 115 | 1.2 | 2.7 | 5.1 | 205 | 0.9 | 0.7 | 2.8  | AT3G25780 | allene oxide cyclase family                                |
| <b>370</b> | 260243_at   | 199 | 1.4 | 2.7 | 3.9 | 194 | 0.9 | 1.1 | 5.9  | AT1G63720 | expressed protein                                          |
| <b>371</b> | 266290_at   | 445 | 1.5 | 2.7 | 2.0 | 413 | 1.0 | 1.8 | 2.1  | AT2G29490 | glutathione transferase, putative                          |
| <b>372</b> | 246316_at   | 69  | 1.4 | 2.7 | 1.9 | 59  | 1.5 | 1.0 | 2.4  | AT3G56890 | hypothetical protein                                       |
| <b>373</b> | 255599_at   | 110 | 0.9 | 2.7 | 3.8 | 85  | 1.1 | 1.5 | 5.0  | AT4G01010 | cyclic nucleotide-regulated ion channel, putative (CNGC13) |
| <b>374</b> | 250083_at   | 87  | 2.6 | 2.7 | 1.3 | 428 | 1.9 | 1.9 | 0.7  | AT5G17220 | glutathione transferase, putative                          |
| <b>375</b> | 247047_at   | 143 | 0.8 | 2.7 | 4.5 | 94  | 1.1 | 1.1 | 3.2  | AT5G66650 | expressed protein                                          |
| <b>376</b> | 250493_at   | 54  | 1.5 | 2.7 | 4.9 | 117 | 0.7 | 0.7 | 2.2  | AT5G09800 | hypothetical protein                                       |
| <b>377</b> | 250882_at   | 104 | 2.8 | 2.7 | 1.9 | 71  | 1.5 | 1.8 | 2.7  | AT5G04000 | expressed protein                                          |
| <b>378</b> | 249139_at   | 308 | 1.2 | 2.7 | 3.7 | 298 | 1.1 | 1.1 | 1.9  | AT5G43170 | Cys2/His2-type zinc finger protein 3 (dbj BAA85109.1)      |
| <b>379</b> | 254321_at   | 376 | 1.5 | 2.7 | 2.4 | 474 | 1.0 | 1.1 | 3.5  | AT4G22590 | trehalose-6-phosphate phosphatase, putative                |
| <b>380</b> | 249489_at   | 122 | 2.7 | 2.7 | 1.6 | 31  | 2.9 | 2.6 | 6.8  | AT5G39090 | transferase family                                         |
| <b>381</b> | 250575_at   | 218 | 1.2 | 2.7 | 3.5 | 188 | 1.0 | 0.9 | 3.4  | AT5G08240 | expressed protein                                          |
| <b>382</b> | 245324_at   | 499 | 1.3 | 2.7 | 2.5 | 707 | 1.0 | 1.0 | 4.7  | AT4G17260 | L-lactate dehydrogenase (LDH), putative                    |
| <b>383</b> | 259850_at   | 93  | 1.3 | 2.7 | 2.3 | 80  | 1.0 | 0.8 | 2.2  | AT1G72240 | expressed protein                                          |
| <b>384</b> | 254922_at   | 73  | 1.2 | 2.7 | 4.3 | 115 | 1.1 | 0.8 | 3.7  | AT4G11370 | RING-H2 finger protein, putative                           |
| <b>385</b> | 247878_at   | 62  | 1.7 | 2.7 | 4.4 | 55  | 0.8 | 0.8 | 1.0  | AT5G57760 | hypothetical protein                                       |
| <b>386</b> | 258998_at   | 374 | 1.5 | 2.7 | 2.6 | 343 | 0.9 | 1.5 | 2.9  | AT3G01820 | adenylate kinase -related                                  |
| <b>387</b> | 253679_at   | 136 | 1.1 | 2.7 | 3.4 | 135 | 0.8 | 0.9 | 1.4  | AT4G29610 | cytidine deaminase 6 (CDA6)                                |
| <b>388</b> | 249552_s_at | 86  | 2.0 | 2.7 | 2.3 | 92  | 1.2 | 1.2 | 3.0  | AT5G38240 | serine/threonine protein kinase, putative                  |
| <b>389</b> | 246305_at   | 306 | 1.6 | 2.7 | 2.8 | 257 | 0.9 | 1.2 | 5.4  | AT3G51890 | expressed protein                                          |
| <b>390</b> | 252193_at   | 245 | 1.0 | 2.7 | 2.9 | 290 | 0.7 | 0.9 | 1.4  | AT3G50060 | myb DNA-binding protein (MYB77)                            |
| <b>391</b> | 262986_at   | 470 | 1.3 | 2.7 | 5.4 | 333 | 1.3 | 2.7 | 3.0  | AT1G23390 | Kelch repeat containing F-box protein family               |
| <b>392</b> | 248611_at   | 95  | 1.5 | 2.7 | 2.2 | 70  | 1.5 | 1.3 | 4.7  | AT5G49520 | WRKY family transcription factor                           |
| <b>393</b> | 252214_at   | 179 | 1.4 | 2.6 | 3.7 | 154 | 0.9 | 1.4 | 7.2  | AT3G50260 | AP2 domain transcription factor, putative                  |
| <b>394</b> | 260727_at   | 273 | 3.2 | 2.6 | 1.1 | 127 | 1.1 | 0.9 | 0.5  | AT1G48100 | polygalacturonase, putative                                |
| <b>395</b> | 256877_at   | 386 | 1.7 | 2.6 | 3.2 | 365 | 0.9 | 1.4 | 5.1  | AT3G26470 | expressed protein                                          |
| <b>396</b> | 258349_at   | 775 | 2.4 | 2.6 | 2.1 | 234 | 0.9 | 1.2 | 3.0  | AT3G17609 | bZIP family transcription factor                           |

|            |             |      |     |     |     |      |      |      |      |           |                                                                         |
|------------|-------------|------|-----|-----|-----|------|------|------|------|-----------|-------------------------------------------------------------------------|
| <b>397</b> | 252373_at   | 227  | 1.4 | 2.6 | 3.2 | 188  | 0.9  | 1.2  | 8.1  | AT3G48090 | disease resistance protein (EDS1)                                       |
| <b>398</b> | 267288_at   | 188  | 1.6 | 2.6 | 3.3 | 151  | 0.9  | 1.2  | 4.4  | AT2G23680 | cold acclimation protein WCOR413 (Triticum aestivum) -related           |
| <b>399</b> | 253104_at   | 316  | 1.1 | 2.6 | 2.2 | 446  | 0.9  | 1.4  | 6.1  | AT4G36010 | thaumatin family                                                        |
| <b>400</b> | 250990_at   | 492  | 1.0 | 2.6 | 2.8 | 427  | 1.1  | 1.1  | 2.5  | AT5G02290 | protein kinase, putative                                                |
| <b>401</b> | 247137_at   | 327  | 1.4 | 2.6 | 2.9 | 258  | 1.1  | 1.4  | 3.1  | AT5G66210 | calcium-dependent protein kinase                                        |
| <b>402</b> | 262229_at   | 227  | 1.3 | 2.6 | 2.3 | 37   | 2.0  | 2.8  | 22.4 | AT1G68620 | expressed protein                                                       |
| <b>403</b> | 248207_at   | 1185 | 3.4 | 2.6 | 1.4 | 360  | 1.0  | 1.8  | 2.5  | AT5G53970 | aminotransferase, putative                                              |
| <b>404</b> | 249780_at   | 151  | 1.4 | 2.6 | 2.5 | 237  | 0.9  | 1.6  | 4.4  | AT5G24240 | ubiquitin family                                                        |
| <b>405</b> | 259428_at   | 98   | 1.2 | 2.6 | 5.1 | 93   | 0.7  | 0.9  | 11.7 | AT1G01560 | mitogen-activated protein kinase (MAPK), putative (MPK11)               |
| <b>406</b> | 264580_at   | 88   | 1.6 | 2.6 | 3.2 | 106  | 1.2  | 1.8  | 12.3 | AT1G05340 | expressed protein                                                       |
| <b>407</b> | 263122_at   | 1024 | 3.6 | 2.6 | 1.4 | 429  | 1.1  | 1.4  | 1.4  | AT1G78510 | geranyl diphosphate synthase (GPPS)(dimethylallyltransferase), putative |
| <b>408</b> | 251937_at   | 260  | 1.2 | 2.6 | 2.9 | 346  | 1.1  | 1.2  | 1.1  | AT3G53400 | expressed protein                                                       |
| <b>409</b> | 252939_at   | 129  | 1.3 | 2.6 | 2.7 | 162  | 0.9  | 1.0  | 2.4  | AT4G39230 | isoflavone reductase, putative                                          |
| <b>410</b> | 256050_at   | 272  | 1.5 | 2.6 | 2.7 | 176  | 1.0  | 1.0  | 4.2  | AT1G07000 | exocyst subunit EXO70 family                                            |
| <b>411</b> | 249987_at   | 227  | 1.2 | 2.6 | 2.9 | 198  | 1.0  | 0.9  | 3.1  | AT5G18490 | expressed protein                                                       |
| <b>412</b> | 248868_at   | 500  | 1.0 | 2.6 | 4.5 | 475  | 1.0  | 1.0  | 2.2  | AT5G46780 | proline-rich protein family                                             |
| <b>413</b> | 247509_at   | 184  | 1.4 | 2.6 | 4.3 | 210  | 1.0  | 1.0  | 1.9  | AT5G62020 | heat shock transcription factor 6 (HSF6)                                |
| <b>414</b> | 257083_s_at | 111  | 1.7 | 2.6 | 4.2 | 188  | 1.3  | 0.7  | 1.5  | AT3G20590 | non-race specific disease resistance protein -related                   |
| <b>415</b> | 248726_at   | 106  | 1.1 | 2.6 | 4.4 | 76   | 1.4  | 0.9  | 2.0  | AT5G47960 | Ras family GTP-binding protein                                          |
| <b>416</b> | 259490_at   | 192  | 2.1 | 2.6 | 1.7 | 153  | 1.0  | 0.9  | 1.7  | AT1G15800 | expressed protein                                                       |
| <b>417</b> | 246631_at   | 635  | 1.4 | 2.6 | 3.0 | 641  | 1.0  | 1.0  | 1.9  | AT1G50740 | expressed protein                                                       |
| <b>418</b> | 250506_at   | 74   | 2.3 | 2.6 | 1.5 | 12   | 10.8 | 26.9 | 49.5 | AT5G09930 | ABC transporter family protein                                          |
| <b>419</b> | 248959_at   | 49   | 1.2 | 2.5 | 3.6 | 16   | 3.5  | 3.5  | 9.7  | AT5G45630 | hypothetical protein                                                    |
| <b>420</b> | 252825_at   | 72   | 1.5 | 2.5 | 2.9 | 44   | 4.2  | 2.7  | 9.9  | AT4G39890 | Ras family GTP-binding protein                                          |
| <b>421</b> | 260287_at   | 320  | 1.4 | 2.5 | 4.3 | 114  | 1.8  | 3.8  | 8.3  | AT1G80440 | Kelch repeat containing F-box protein family                            |
| <b>422</b> | 263478_at   | 1018 | 1.3 | 2.5 | 2.5 | 917  | 1.0  | 1.0  | 3.4  | AT2G31880 | leucine-rich repeat transmembrane protein kinase, putative              |
| <b>423</b> | 262228_at   | 76   | 1.4 | 2.5 | 3.2 | 67   | 0.9  | 1.1  | 6.3  | AT1G68690 | protein kinase family                                                   |
| <b>424</b> | 249078_at   | 934  | 1.5 | 2.5 | 2.4 | 1040 | 1.0  | 1.1  | 2.4  | AT5G44070 | phytochelatin synthase (gb AAD41794.1)                                  |
| <b>425</b> | 262853_at   | 248  | 2.3 | 2.5 | 1.5 | 179  | 1.2  | 1.2  | 1.3  | AT1G20890 | expressed protein                                                       |
| <b>426</b> | 247793_at   | 276  | 1.7 | 2.5 | 3.2 | 173  | 1.4  | 1.0  | 1.2  | AT5G58650 | expressed protein                                                       |
| <b>427</b> | 249798_at   | 1433 | 2.6 | 2.5 | 1.2 | 175  | 1.1  | 2.1  | 2.1  | AT5G23730 | transducin / WD-40 repeat protein family                                |
| <b>428</b> | 252928_at   | 123  | 1.5 | 2.5 | 3.4 | 118  | 0.9  | 1.0  | 5.2  | AT4G38940 | Kelch repeat containing F-box protein family                            |
| <b>429</b> | 261748_at   | 261  | 1.0 | 2.5 | 3.4 | 166  | 1.2  | 1.0  | 4.8  | AT1G76070 | expressed protein                                                       |
| <b>430</b> | 249583_at   | 393  | 1.0 | 2.5 | 3.5 | 314  | 0.9  | 0.8  | 1.5  | AT5G37770 | calmodulin-related protein 2, touch-induced (TCH2)                      |
| <b>431</b> | 248311_at   | 454  | 2.4 | 2.5 | 1.6 | 135  | 0.9  | 1.0  | 1.6  | AT5G52570 | beta-carotene hydroxylase, putative                                     |
| <b>432</b> | 247693_at   | 286  | 1.3 | 2.5 | 3.3 | 253  | 1.1  | 1.0  | 2.0  | AT5G59730 | exocyst subunit EXO70 family                                            |

|     |           |      |     |     |     |      |     |     |      |           |                                                              |
|-----|-----------|------|-----|-----|-----|------|-----|-----|------|-----------|--------------------------------------------------------------|
| 433 | 250796_at | 55   | 1.1 | 2.5 | 7.3 | 28   | 3.4 | 1.4 | 28.6 | AT5G05300 | hypothetical protein                                         |
| 434 | 266983_at | 261  | 1.2 | 2.5 | 2.6 | 245  | 1.1 | 1.3 | 3.0  | AT2G39400 | hydrolase, alpha/beta fold family                            |
| 435 | 247708_at | 363  | 0.9 | 2.5 | 4.4 | 431  | 1.0 | 0.8 | 1.8  | AT5G59550 | expressed protein                                            |
| 436 | 260070_at | 111  | 1.3 | 2.5 | 4.0 | 96   | 0.9 | 1.3 | 1.1  | AT1G73830 | bHLH protein family                                          |
| 437 | 255479_at | 3572 | 1.2 | 2.5 | 3.2 | 2102 | 0.8 | 0.7 | 3.1  | AT4G02380 | late embryogenesis abundant protein family                   |
| 438 | 255895_at | 475  | 1.5 | 2.5 | 3.2 | 211  | 1.1 | 1.8 | 4.3  | AT1G17990 | 12-oxophytodienoate reductase, putative                      |
| 439 | 266737_at | 113  | 1.3 | 2.5 | 3.1 | 125  | 0.8 | 0.7 | 2.8  | AT2G47140 | short-chain dehydrogenase/reductase family protein           |
| 440 | 263935_at | 285  | 0.8 | 2.5 | 3.1 | 333  | 0.8 | 0.6 | 1.8  | AT2G35930 | expressed protein                                            |
| 441 | 250149_at | 277  | 1.3 | 2.5 | 2.6 | 241  | 1.1 | 0.8 | 0.8  | AT5G14700 | cinnamoyl-CoA reductase-related                              |
| 442 | 254242_at | 164  | 1.0 | 2.5 | 1.7 | 94   | 0.9 | 1.2 | 5.8  | AT4G23200 | serine /threonine kinase - like protein                      |
| 443 | 260211_at | 198  | 1.5 | 2.4 | 3.5 | 158  | 1.0 | 1.2 | 3.3  | AT1G74440 | expressed protein                                            |
| 444 | 253997_at | 110  | 1.5 | 2.4 | 2.6 | 88   | 0.9 | 1.0 | 3.4  | AT4G26090 | disease resistance protein RPS2 (CC-NBS-LRR class), putative |
| 445 | 264692_at | 327  | 1.6 | 2.4 | 2.0 | 397  | 1.1 | 1.1 | 1.4  | AT1G70000 | DNA binding protein MybSt1 -related                          |
| 446 | 249140_at | 584  | 2.0 | 2.4 | 1.4 | 496  | 1.0 | 1.2 | 1.8  | AT5G43190 | F-box protein family, AtFBX6                                 |
| 447 | 259964_at | 218  | 3.5 | 2.4 | 1.2 | 168  | 1.2 | 0.6 | 0.6  | AT1G53680 | glutathione transferase, putative                            |
| 448 | 250279_at | 414  | 1.4 | 2.4 | 2.5 | 485  | 1.0 | 1.1 | 6.5  | AT5G13200 | GRAM domain-containing protein                               |
| 449 | 261719_at | 156  | 1.7 | 2.4 | 2.9 | 160  | 0.9 | 0.9 | 4.9  | AT1G18380 | hypothetical protein                                         |
| 450 | 256548_at | 530  | 2.4 | 2.4 | 1.4 | 500  | 1.0 | 1.0 | 0.7  | AT3G14770 | nodulin MtN3 family protein                                  |
| 451 | 252081_at | 98   | 1.1 | 2.4 | 2.6 | 149  | 1.1 | 0.6 | 0.7  | AT3G51910 | heat shock transcription factor family                       |
| 452 | 266749_at | 859  | 1.2 | 2.4 | 2.6 | 838  | 1.0 | 0.8 | 1.2  | AT2G47060 | serine/threonine protein kinase, putative                    |
| 453 | 266271_at | 90   | 1.6 | 2.4 | 1.9 | 77   | 1.2 | 1.4 | 1.4  | AT2G29440 | glutathione transferase, putative                            |
| 454 | 254447_at | 917  | 2.0 | 2.4 | 1.9 | 512  | 1.1 | 2.2 | 5.9  | AT4G20860 | FAD-linked oxidoreductase family                             |
| 455 | 253140_at | 413  | 1.4 | 2.4 | 2.7 | 319  | 1.0 | 1.0 | 3.0  | AT4G35480 | RING-H2 finger protein RHA3b                                 |
| 456 | 262653_at | 167  | 1.3 | 2.4 | 1.5 | 243  | 1.4 | 1.3 | 1.3  | AT1G14130 | 2-oxoglutarate-dependent dioxygenase, putative               |
| 457 | 250550_at | 220  | 1.3 | 2.4 | 1.9 | 224  | 1.1 | 1.1 | 1.0  | AT5G07870 | hydroxycinnamoyl benzoyltransferase-related                  |
| 458 | 262678_at | 604  | 1.7 | 2.4 | 1.8 | 485  | 1.1 | 1.2 | 2.4  | AT1G75810 | expressed protein                                            |
| 459 | 257785_at | 133  | 1.5 | 2.4 | 2.9 | 216  | 1.0 | 0.9 | 2.1  | AT3G26980 | ubiquitin family                                             |
| 460 | 261005_at | 96   | 2.2 | 2.4 | 2.7 | 93   | 0.6 | 1.8 | 10.4 | AT1G26420 | FAD-linked oxidoreductase family                             |
| 461 | 260772_at | 572  | 1.1 | 2.4 | 2.5 | 429  | 1.0 | 1.3 | 4.4  | AT1G49050 | expressed protein                                            |
| 462 | 251200_at | 303  | 2.0 | 2.4 | 1.5 | 312  | 0.9 | 1.8 | 3.1  | AT3G63010 | expressed protein                                            |
| 463 | 266799_at | 145  | 1.3 | 2.4 | 3.6 | 107  | 0.6 | 0.7 | 1.6  | AT2G22860 | (AtPSK) phyto-sulfokine precursor 2                          |
| 464 | 265387_at | 205  | 1.3 | 2.4 | 2.5 | 108  | 1.2 | 2.0 | 4.3  | AT2G20670 | expressed protein                                            |
| 465 | 250323_at | 255  | 1.1 | 2.4 | 3.5 | 294  | 0.9 | 0.9 | 1.0  | AT5G12880 | proline-rich protein family                                  |
| 466 | 267066_at | 445  | 2.9 | 2.4 | 1.4 | 190  | 1.3 | 2.5 | 3.3  | AT2G41040 | expressed protein                                            |
| 467 | 257407_at | 616  | 1.2 | 2.4 | 3.2 | 743  | 0.8 | 0.8 | 1.5  | AT1G27100 | expressed protein                                            |
| 468 | 248821_at | 227  | 0.9 | 2.4 | 3.1 | 229  | 0.9 | 1.1 | 4.5  | AT5G47070 | protein kinase, putative                                     |
| 469 | 261958_at | 375  | 2.9 | 2.4 | 1.5 | 176  | 1.2 | 1.4 | 1.2  | AT1G64500 | peptide transporter -related                                 |

|     |             |      |     |     |     |      |     |     |      |           |                                                          |
|-----|-------------|------|-----|-----|-----|------|-----|-----|------|-----------|----------------------------------------------------------|
| 470 | 260327_at   | 1295 | 1.5 | 2.4 | 2.5 | 1080 | 1.0 | 1.2 | 3.0  | AT1G63840 | RING-H2 finger protein, putative                         |
| 471 | 260602_at   | 1683 | 1.2 | 2.4 | 2.1 | 1142 | 1.0 | 0.9 | 2.3  | AT1G55920 | serine acetyltransferase                                 |
| 472 | 250049_at   | 492  | 2.6 | 2.4 | 1.3 | 193  | 0.9 | 1.7 | 2.4  | AT5G17780 | hydrolase, alpha/beta fold family                        |
| 473 | 266097_at   | 2746 | 2.3 | 2.4 | 2.2 | 1190 | 1.3 | 1.8 | 4.0  | AT2G37970 | expressed protein                                        |
| 474 | 251084_at   | 120  | 2.5 | 2.4 | 1.2 | 117  | 0.9 | 1.0 | 1.3  | AT5G01520 | C3HC4-type zinc finger protein family                    |
| 475 | 260296_at   | 112  | 0.9 | 2.4 | 3.0 | 115  | 1.1 | 1.0 | 1.3  | AT1G63750 | disease resistance protein (TIR-NBS-LRR class), putative |
| 476 | 261161_at   | 125  | 1.5 | 2.4 | 2.8 | 166  | 1.4 | 0.8 | 2.9  | AT1G34420 | leucine rich repeat protein kinase family                |
| 477 | 257925_at   | 300  | 1.6 | 2.4 | 3.1 | 358  | 0.9 | 1.0 | 1.6  | AT3G23170 | expressed protein                                        |
| 478 | 250666_at   | 146  | 1.2 | 2.3 | 2.6 | 53   | 1.4 | 2.6 | 10.7 | AT5G07100 | WRKY family transcription factor                         |
| 479 | 254459_at   | 283  | 3.6 | 2.3 | 1.2 | 62   | 1.0 | 0.7 | 3.3  | AT4G21200 | gibberellin 20-oxidase family                            |
| 480 | 266834_s_at | 126  | 1.2 | 2.3 | 3.2 | 146  | 0.9 | 0.8 | 1.2  | AT2G30020 | protein phosphatase 2C (PP2C), putative                  |
| 481 | 260527_at   | 253  | 1.3 | 2.3 | 3.3 | 93   | 1.1 | 0.7 | 1.1  | AT2G47270 | expressed protein                                        |
| 482 | 249459_at   | 149  | 1.9 | 2.3 | 1.8 | 108  | 0.7 | 0.8 | 3.4  | AT5G39580 | peroxidase, putative                                     |
| 483 | 252652_at   | 379  | 1.5 | 2.3 | 2.7 | 253  | 1.2 | 1.3 | 2.2  | AT3G44720 | prephenate dehydratase family                            |
| 484 | 253281_at   | 468  | 1.8 | 2.3 | 1.6 | 343  | 1.2 | 1.7 | 1.3  | AT4G34138 | glycosyltransferase family                               |
| 485 | 251930_at   | 330  | 1.7 | 2.3 | 1.9 | 437  | 1.2 | 1.4 | 2.0  | AT3G53780 | membrane protein, Rhomboid family                        |
| 486 | 252533_at   | 60   | 1.4 | 2.3 | 3.4 | 97   | 0.8 | 0.6 | 1.0  | AT3G46110 | expressed protein                                        |
| 487 | 266269_at   | 101  | 1.5 | 2.3 | 2.0 | 99   | 1.0 | 1.0 | 1.5  | AT2G29480 | glutathione transferase, putative                        |
| 488 | 249677_at   | 3981 | 3.6 | 2.3 | 1.4 | 545  | 1.0 | 1.9 | 3.7  | AT5G35970 | DNA helicase-related                                     |
| 489 | 246943_at   | 308  | 1.7 | 2.3 | 2.1 | 191  | 1.1 | 1.0 | 5.2  | AT5G25440 | protein kinase family                                    |
| 490 | 262165_at   | 290  | 0.8 | 2.3 | 2.1 | 301  | 1.2 | 1.0 | 1.2  | AT1G75020 | phospholipid/glycerol acyltransferase family             |
| 491 | 267070_at   | 273  | 2.1 | 2.3 | 1.6 | 203  | 1.3 | 1.4 | 1.8  | AT2G41000 | DnaJ protein family                                      |
| 492 | 249862_at   | 478  | 1.2 | 2.3 | 4.2 | 495  | 1.2 | 1.6 | 1.6  | AT5G22920 | PGPD14 protein                                           |
| 493 | 260803_at   | 587  | 1.8 | 2.3 | 1.0 | 589  | 1.0 | 1.2 | 2.5  | AT1G78340 | glutathione transferase, putative                        |
| 494 | 261453_at   | 137  | 1.2 | 2.3 | 3.1 | 85   | 1.0 | 1.1 | 1.4  | AT1G21130 | O-methyltransferase 1, putative                          |
| 495 | 263796_at   | 356  | 2.3 | 2.3 | 1.5 | 218  | 1.0 | 1.2 | 1.2  | AT2G24540 | Kelch repeat containing F-box protein family             |
| 496 | 246272_at   | 1021 | 2.0 | 2.3 | 1.6 | 353  | 1.0 | 1.5 | 3.1  | AT4G37150 | hydrolase, alpha/beta fold family                        |
| 497 | 264264_at   | 318  | 2.1 | 2.3 | 1.8 | 266  | 1.0 | 0.7 | 0.8  | AT1G09250 | bHLH protein                                             |
| 498 | 245768_at   | 1616 | 1.2 | 2.3 | 2.7 | 1563 | 1.0 | 1.2 | 2.3  | AT1G33590 | disease resistance protein-related (LRR)                 |
| 499 | 259445_at   | 294  | 1.1 | 2.3 | 1.7 | 222  | 1.0 | 0.7 | 1.7  | AT1G02400 | gibberellin 2-oxidase (GA2-oxidase), putative            |
| 500 | 257401_at   | 161  | 1.7 | 2.3 | 1.9 | 153  | 1.1 | 1.8 | 7.6  | AT1G23550 | hypothetical protein                                     |
| 501 | 266720_s_at | 308  | 2.6 | 2.3 | 1.6 | 5    | 4.8 | 5.7 | 49.0 | AT2G46790 | pseudo-response regulator, APRR9 (APRR1/TOC1 family)     |
| 502 | 255844_at   | 111  | 1.2 | 2.2 | 2.9 | 126  | 0.9 | 1.0 | 2.2  | AT2G33580 | protein kinase -related                                  |
| 503 | 262542_at   | 278  | 1.0 | 2.2 | 2.2 | 295  | 0.9 | 1.7 | 6.0  | AT1G34180 | No apical meristem (NAM) protein family                  |
| 504 | 266752_at   | 441  | 1.4 | 2.2 | 1.4 | 488  | 0.9 | 1.3 | 4.4  | AT2G47000 | P-glycoprotein, putative                                 |
| 505 | 246203_at   | 350  | 1.5 | 2.2 | 0.8 | 431  | 0.7 | 1.0 | 1.9  | AT4G36610 | hydrolase, alpha/beta fold family                        |
| 506 | 265093_at   | 130  | 2.0 | 2.2 | 1.4 | 123  | 1.1 | 1.2 | 2.1  | AT1G03905 | ABC transporter family protein                           |

|     |             |      |     |     |     |      |     |     |      |           |                                                             |
|-----|-------------|------|-----|-----|-----|------|-----|-----|------|-----------|-------------------------------------------------------------|
| 507 | 256755_at   | 415  | 1.1 | 2.2 | 2.8 | 391  | 1.0 | 0.9 | 1.9  | AT3G25600 | calmodulin, putative                                        |
| 508 | 249746_at   | 314  | 1.3 | 2.2 | 2.5 | 257  | 1.1 | 0.9 | 2.6  | AT5G24590 | No apical meristem (NAM) protein family                     |
| 509 | 248814_at   | 142  | 1.0 | 2.2 | 2.6 | 161  | 1.2 | 0.7 | 2.2  | AT5G46910 | hypothetical protein                                        |
| 510 | 256968_at   | 121  | 2.1 | 2.2 | 2.0 | 137  | 0.9 | 1.0 | 1.4  | AT3G21070 | expressed protein                                           |
| 511 | 259705_at   | 507  | 1.8 | 2.2 | 1.9 | 698  | 1.0 | 1.2 | 1.6  | AT1G77450 | No apical meristem (NAM) protein family                     |
| 512 | 263931_at   | 237  | 1.2 | 2.2 | 3.5 | 110  | 1.2 | 1.1 | 3.0  | AT2G36220 | expressed protein                                           |
| 513 | 246744_at   | 1425 | 1.3 | 2.2 | 2.4 | 1688 | 1.0 | 1.9 | 3.8  | AT5G27760 | expressed protein                                           |
| 514 | 247811_at   | 456  | 1.0 | 2.2 | 2.9 | 355  | 1.0 | 1.2 | 3.2  | AT5G58430 | leucine zipper-containing protein                           |
| 515 | 252010_at   | 741  | 2.2 | 2.2 | 1.6 | 534  | 1.1 | 1.1 | 1.2  | AT3G52740 | expressed protein                                           |
| 516 | 248719_at   | 874  | 1.3 | 2.2 | 2.2 | 1126 | 1.0 | 0.9 | 1.3  | AT5G47910 | respiratory burst oxidase protein D (NADPH oxidase) (RbohD) |
| 517 | 245936_at   | 758  | 2.3 | 2.2 | 1.4 | 532  | 1.0 | 1.2 | 1.6  | AT5G19850 | hydrolase, alpha/beta fold family                           |
| 518 | 249071_at   | 100  | 1.7 | 2.2 | 1.1 | 56   | 1.6 | 1.2 | 1.1  | AT5G44050 | MATE efflux protein family                                  |
| 519 | 247426_at   | 488  | 0.8 | 2.2 | 2.1 | 331  | 0.8 | 1.0 | 2.1  | AT5G62570 | calmodulin-binding protein                                  |
| 520 | 254432_at   | 1441 | 1.6 | 2.2 | 2.2 | 995  | 0.9 | 1.8 | 4.7  | AT4G20830 | FAD-linked oxidoreductase family                            |
| 521 | 259293_at   | 95   | 1.1 | 2.2 | 1.9 | 152  | 0.8 | 1.1 | 1.7  | AT3G11580 | DNA-binding protein, putative                               |
| 522 | 266259_at   | 166  | 1.3 | 2.2 | 2.8 | 254  | 1.2 | 1.8 | 2.8  | AT2G27830 | expressed protein                                           |
| 523 | 247800_at   | 202  | 0.7 | 2.2 | 2.4 | 385  | 1.2 | 3.3 | 5.5  | AT5G58570 | expressed protein                                           |
| 524 | 252671_at   | 1105 | 1.3 | 2.2 | 1.7 | 1043 | 1.0 | 1.0 | 1.5  | AT3G44190 | pyridine nucleotide-disulphide oxidoreductase family        |
| 525 | 258742_at   | 824  | 2.8 | 2.2 | 1.0 | 316  | 0.9 | 0.7 | 1.5  | AT3G05800 | bHLH protein                                                |
| 526 | 246197_at   | 152  | 1.1 | 2.2 | 1.1 | 97   | 1.1 | 1.0 | 1.8  | AT4G37010 | caltractin (centrin), putative                              |
| 527 | 246966_at   | 403  | 2.3 | 2.2 | 0.9 | 207  | 1.0 | 1.9 | 2.0  | AT5G24850 | DNA photolyase - like protein                               |
| 528 | 253922_at   | 3454 | 2.6 | 2.2 | 1.2 | 3995 | 1.2 | 0.9 | 0.5  | AT4G26850 | expressed protein                                           |
| 529 | 262452_at   | 417  | 1.8 | 2.2 | 1.5 | 312  | 1.2 | 1.1 | 1.4  | AT1G11210 | expressed protein                                           |
| 530 | 253958_at   | 380  | 1.0 | 2.2 | 3.2 | 357  | 0.9 | 0.9 | 1.6  | AT4G26400 | expressed protein                                           |
| 531 | 258729_at   | 1037 | 1.9 | 2.2 | 1.6 | 571  | 1.0 | 1.5 | 3.1  | AT3G11900 | amino acid transporter family                               |
| 532 | 260206_at   | 134  | 1.1 | 2.2 | 2.1 | 205  | 0.9 | 0.6 | 1.7  | AT1G70740 | protein kinase family                                       |
| 533 | 250420_at   | 460  | 2.4 | 2.1 | 1.2 | 234  | 1.0 | 1.4 | 1.8  | AT5G11260 | bZIP protein HY5                                            |
| 534 | 253455_at   | 2035 | 1.4 | 2.1 | 1.8 | 1548 | 1.0 | 1.5 | 4.5  | AT4G32020 | expressed protein                                           |
| 535 | 246600_at   | 111  | 1.6 | 2.1 | 2.7 | 140  | 0.9 | 1.2 | 2.5  | AT5G14930 | leaf senescence-associated protein (SAG101)                 |
| 536 | 247044_at   | 190  | 1.2 | 2.1 | 2.4 | 233  | 1.0 | 1.2 | 4.2  | AT5G66850 | MAP protein kinase                                          |
| 537 | 261319_at   | 620  | 1.9 | 2.1 | 1.6 | 498  | 1.3 | 1.3 | 1.0  | AT1G53090 | WD-40 repeat protein family                                 |
| 538 | 262183_at   | 190  | 1.1 | 2.1 | 2.1 | 187  | 0.9 | 1.0 | 1.5  | AT1G77890 | expressed protein                                           |
| 539 | 253416_at   | 208  | 2.0 | 2.1 | 1.0 | 282  | 1.0 | 3.2 | 13.2 | AT4G33070 | pyruvate decarboxylase-1 (Pdc1)                             |
| 540 | 253943_at   | 1472 | 1.7 | 2.1 | 1.9 | 966  | 1.1 | 1.1 | 1.2  | AT4G27030 | hypothetical protein                                        |
| 541 | 249480_s_at | 523  | 1.4 | 2.1 | 2.4 | 619  | 1.2 | 1.0 | 1.4  | AT5G38990 | protein kinase family                                       |
| 542 | 267624_at   | 648  | 1.2 | 2.1 | 2.2 | 572  | 1.0 | 1.2 | 3.4  | AT2G39660 | protein kinase, putative                                    |
| 543 | 266536_at   | 435  | 1.3 | 2.1 | 1.8 | 414  | 0.9 | 0.9 | 3.6  | AT2G16900 | expressed protein                                           |

|     |             |      |     |     |     |      |     |     |     |           |                                                                                                                                                   |
|-----|-------------|------|-----|-----|-----|------|-----|-----|-----|-----------|---------------------------------------------------------------------------------------------------------------------------------------------------|
| 544 | 264339_at   | 131  | 1.2 | 2.1 | 4.7 | 59   | 1.2 | 2.2 | 4.1 | AT1G70290 | alpha,alpha-trehalose-phosphate synthase, UDP-forming (trehalose-6-phosphate synthase/UDP-glucose-glucosephosphate glucosyltransferase), putative |
| 545 | 262237_at   | 731  | 1.6 | 2.1 | 2.4 | 712  | 1.0 | 1.2 | 2.1 | AT1G48320 | thioesterase family                                                                                                                               |
| 546 | 245757_at   | 171  | 0.8 | 2.1 | 3.1 | 140  | 1.1 | 0.9 | 0.7 | AT1G35140 | phosphate-induced (phi-1) protein -related                                                                                                        |
| 547 | 255880_at   | 457  | 1.0 | 2.1 | 2.2 | 368  | 1.0 | 1.0 | 2.8 | AT1G67060 | expressed protein                                                                                                                                 |
| 548 | 258650_at   | 296  | 1.6 | 2.1 | 1.8 | 230  | 0.9 | 1.7 | 6.6 | AT3G09830 | protein kinase, putative                                                                                                                          |
| 549 | 265536_at   | 182  | 1.2 | 2.1 | 3.0 | 64   | 2.6 | 3.9 | 4.2 | AT2G15880 | leucine-rich repeat extensin family                                                                                                               |
| 550 | 256589_at   | 1280 | 1.5 | 2.1 | 1.9 | 826  | 1.0 | 1.9 | 1.7 | AT3G28740 | cytochrome P450 family                                                                                                                            |
| 551 | 257766_at   | 797  | 1.6 | 2.1 | 2.0 | 485  | 1.0 | 1.1 | 2.9 | AT3G23030 | auxin-responsive protein IAA2 (Indoleacetic acid-induced protein 2)                                                                               |
| 552 | 263704_at   | 935  | 1.0 | 2.1 | 2.8 | 850  | 1.2 | 1.1 | 2.2 | AT1G31130 | expressed protein                                                                                                                                 |
| 553 | 260362_at   | 474  | 1.3 | 2.1 | 2.1 | 422  | 0.9 | 1.0 | 3.0 | AT1G70530 | protein kinase -related                                                                                                                           |
| 554 | 262626_at   | 2275 | 2.9 | 2.1 | 1.1 | 909  | 1.1 | 2.3 | 2.5 | AT1G06430 | FtsH protease, putative                                                                                                                           |
| 555 | 262126_at   | 67   | 1.2 | 2.1 | 2.4 | 99   | 0.9 | 1.0 | 1.9 | AT1G59620 | disease resistance protein (CC-NBS class), putative                                                                                               |
| 556 | 263490_at   | 312  | 2.1 | 2.1 | 1.8 | 226  | 1.3 | 1.4 | 1.4 | AT2G42620 | F-box protein (ORE9) (FBL7)                                                                                                                       |
| 557 | 254549_at   | 2001 | 1.6 | 2.1 | 1.7 | 1959 | 1.1 | 1.1 | 1.5 | AT4G19880 | expressed protein                                                                                                                                 |
| 558 | 253022_at   | 539  | 1.6 | 2.1 | 2.0 | 847  | 1.1 | 0.9 | 1.1 | AT4G38060 | expressed protein                                                                                                                                 |
| 559 | 258315_at   | 240  | 2.3 | 2.1 | 1.7 | 149  | 0.9 | 0.7 | 0.5 | AT3G16175 | thioesterase-related                                                                                                                              |
| 560 | 256093_at   | 222  | 0.7 | 2.1 | 2.4 | 286  | 1.4 | 0.7 | 0.6 | AT1G20823 | RING zinc finger protein -related                                                                                                                 |
| 561 | 254331_s_at | 3734 | 1.3 | 2.1 | 2.3 | 3745 | 1.0 | 0.9 | 1.1 | AT4G22710 | cytochrome P450 family                                                                                                                            |
| 562 | 246523_at   | 478  | 3.9 | 2.1 | 1.1 | 245  | 1.0 | 1.4 | 1.6 | AT5G15850 | Zinc finger protein CONSTANS-LIKE 1 (COL1)                                                                                                        |
| 563 | 266778_at   | 296  | 2.2 | 2.1 | 1.1 | 197  | 1.0 | 1.2 | 0.6 | AT2G29090 | cytochrome p450 family                                                                                                                            |
| 564 | 267142_at   | 424  | 1.2 | 2.1 | 1.9 | 485  | 0.9 | 1.5 | 3.5 | AT2G38290 | ammonium transporter -related                                                                                                                     |
| 565 | 247493_at   | 293  | 1.2 | 2.1 | 1.8 | 306  | 0.9 | 0.8 | 2.4 | AT5G61900 | copine BONZAI1 (BON1)                                                                                                                             |
| 566 | 259379_at   | 148  | 1.8 | 2.1 | 1.6 | 150  | 0.8 | 0.6 | 0.6 | AT3G16350 | myb family transcription factor                                                                                                                   |
| 567 | 266514_at   | 964  | 1.6 | 2.1 | 1.7 | 680  | 1.1 | 1.2 | 2.6 | AT2G47890 | CONSTANS B-box zinc finger family protein                                                                                                         |
| 568 | 267008_at   | 217  | 1.4 | 2.1 | 1.9 | 227  | 0.6 | 1.1 | 3.1 | AT2G39350 | ABC transporter family protein                                                                                                                    |
| 569 | 250858_at   | 141  | 1.2 | 2.1 | 2.1 | 158  | 1.1 | 1.4 | 3.0 | AT5G04760 | myb family transcription factor                                                                                                                   |
| 570 | 247283_at   | 1083 | 1.6 | 2.1 | 1.6 | 988  | 1.0 | 1.1 | 2.7 | AT5G64250 | 2-nitropropane dioxygenase-related protein                                                                                                        |
| 571 | 265737_at   | 475  | 1.0 | 2.1 | 3.3 | 587  | 0.8 | 0.7 | 1.4 | AT2G01180 | phosphatidic acid phosphatase (PAP2) family                                                                                                       |
| 572 | 260345_at   | 211  | 1.0 | 2.1 | 2.2 | 203  | 1.1 | 1.1 | 3.8 | AT1G69270 | receptor protein kinase -related                                                                                                                  |
| 573 | 262571_at   | 370  | 1.2 | 2.1 | 2.0 | 355  | 0.9 | 0.8 | 2.9 | AT1G15430 | expressed protein                                                                                                                                 |
| 574 | 255967_at   | 546  | 1.3 | 2.1 | 2.0 | 518  | 1.1 | 1.1 | 3.1 | AT1G22280 | protein phosphatase 2C (PP2C), putative                                                                                                           |
| 575 | 262360_at   | 270  | 1.3 | 2.1 | 2.3 | 211  | 1.1 | 0.7 | 2.9 | AT1G73080 | leucine-rich repeat transmembrane protein kinase, putative                                                                                        |
| 576 | 259224_at   | 508  | 1.6 | 2.1 | 1.5 | 598  | 1.0 | 1.8 | 2.6 | AT3G07800 | thymidine kinase -related                                                                                                                         |
| 577 | 261327_at   | 129  | 1.2 | 2.1 | 2.4 | 129  | 0.9 | 0.9 | 1.0 | AT1G44830 | AP2 domain transcription factor TINY, putative                                                                                                    |
| 578 | 259109_at   | 271  | 1.1 | 2.1 | 2.3 | 180  | 1.5 | 1.4 | 3.7 | AT3G05580 | serine/threonine protein phosphatase (PP1)                                                                                                        |



|            |           |      |     |     |     |      |     |     |      |           |                                                |
|------------|-----------|------|-----|-----|-----|------|-----|-----|------|-----------|------------------------------------------------|
| <b>579</b> | 248964_at | 121  | 1.3 | 2.1 | 2.4 | 84   | 1.2 | 1.0 | 1.6  | AT5G45340 | cytochrome P450 family                         |
| <b>580</b> | 249125_at | 871  | 1.1 | 2.1 | 2.2 | 676  | 1.1 | 2.3 | 5.7  | AT5G43450 | 2-oxoglutarate-dependent dioxygenase, putative |
| <b>581</b> | 264645_at | 247  | 1.1 | 2.1 | 2.1 | 222  | 1.1 | 1.0 | 3.5  | AT1G08940 | expressed protein                              |
| <b>582</b> | 265824_at | 643  | 1.9 | 2.0 | 1.3 | 354  | 0.9 | 0.9 | 1.1  | AT2G35650 | glycosyltransferase family 2                   |
| <b>583</b> | 251725_at | 175  | 2.3 | 2.0 | 0.6 | 202  | 1.2 | 1.1 | 1.3  | AT3G56260 | expressed protein                              |
| <b>584</b> | 251621_at | 57   | 1.7 | 2.0 | 2.8 | 48   | 1.4 | 1.2 | 12.6 | AT3G57700 | protein kinase, putative                       |
| <b>585</b> | 248795_at | 500  | 1.2 | 2.0 | 3.4 | 629  | 1.0 | 1.2 | 1.4  | AT5G47390 | Myb-related transcription activator-like       |
| <b>586</b> | 251020_at | 2743 | 2.5 | 2.0 | 0.8 | 1263 | 1.0 | 1.3 | 1.7  | AT5G02270 | ABC transporter family protein                 |
| <b>587</b> | 267063_at | 455  | 1.1 | 2.0 | 2.9 | 418  | 0.9 | 1.1 | 1.8  | AT2G41120 | expressed protein                              |
| <b>588</b> | 252422_at | 398  | 1.3 | 2.0 | 1.9 | 423  | 1.0 | 1.2 | 3.7  | AT3G47550 | expressed protein                              |
| <b>589</b> | 261973_at | 155  | 1.2 | 2.0 | 2.3 | 115  | 1.0 | 1.2 | 3.0  | AT1G64610 | expressed protein                              |
| <b>590</b> | 256894_at | 676  | 1.8 | 2.0 | 1.7 | 909  | 1.0 | 0.8 | 0.3  | AT3G21870 | cyclin family                                  |
| <b>591</b> | 256816_at | 275  | 2.5 | 2.0 | 1.1 | 257  | 1.1 | 1.7 | 2.1  | AT3G21400 | expressed protein                              |
| <b>592</b> | 253292_at | 198  | 1.0 | 2.0 | 3.6 | 234  | 1.0 | 1.0 | 2.0  | AT4G33985 | expressed protein                              |
| <b>593</b> | 256430_at | 214  | 1.5 | 2.0 | 2.0 | 156  | 0.9 | 1.2 | 11.7 | AT3G11020 | DRE binding protein (DREB2B)                   |
| <b>594</b> | 265547_at | 276  | 1.4 | 2.0 | 1.9 | 212  | 1.2 | 1.3 | 1.1  | AT2G28305 | expressed protein                              |
| <b>595</b> | 262935_at | 607  | 1.3 | 2.0 | 1.5 | 658  | 1.2 | 1.3 | 1.4  | AT1G79410 | transporter - related                          |
| <b>596</b> | 251839_at | 140  | 1.2 | 2.0 | 1.4 | 192  | 1.0 | 1.3 | 3.1  | AT3G54950 | patatin-related                                |
| <b>597</b> | 254255_at | 173  | 1.4 | 2.0 | 2.0 | 152  | 0.8 | 0.9 | 3.3  | AT4G23220 | serine/threonine kinase - like protein         |
| <b>598</b> | 250024_at | 166  | 1.6 | 2.0 | 1.6 | 171  | 0.9 | 1.3 | 7.0  | AT5G18270 | NAM (no apical meristem)-related protein       |
| <b>599</b> | 264779_at | 1081 | 2.6 | 2.0 | 1.3 | 838  | 1.2 | 1.4 | 1.8  | AT1G08570 | thioredoxin family                             |
| <b>600</b> | 255594_at | 841  | 1.8 | 2.0 | 1.3 | 524  | 1.0 | 1.5 | 2.6  | AT4G01660 | ABC transporter -related                       |
| <b>601</b> | 250850_at | 576  | 1.3 | 2.0 | 1.9 | 589  | 1.0 | 0.9 | 1.7  | AT5G04550 | expressed protein                              |

Fold induction for 305-1h is averaged from four independent ATH-1 array hybridizations, all others from two independent array hybridizations. Applied threshold is 2-fold. Annotation June 15, 2003.
