# Supplementary material
Source: PubMed Central journal article supplement (PMC337064)
Supplement: pnas_0308044100_4.pdf [file pnas_0308044100_4.pdf]

**Table 4. 295\_1hr\_decrease**

|    | Probe set   | Fold induction             |         |         |            | Fold induction             |         |         |            | Identifier |                                                                            |
|----|-------------|----------------------------|---------|---------|------------|----------------------------|---------|---------|------------|------------|----------------------------------------------------------------------------|
|    |             | Expression level (327, 1h) | 305, 1h | 295, 1h | quartz, 1h | Expression level (327, 1h) | 305, 6h | 295, 6h | quartz, 6h |            |                                                                            |
| 1  | 257421_at   | 184                        | 0.6     | 0.0     | 0.1        | 91                         | 6.9     | 0.4     | 0.2        | AT1G12030  | hypothetical protein                                                       |
| 2  | 246884_at   | 1613                       | 0.4     | 0.1     | 0.1        | 959                        | 1.0     | 0.7     | 0.2        | AT5G26220  | expressed protein                                                          |
| 3  | 263318_at   | 144                        | 0.6     | 0.1     | 0.2        | 325                        | 1.0     | 1.1     | 0.7        | AT2G24762  | expressed protein                                                          |
| 4  | 248676_at   | 595                        | 0.3     | 0.1     | 0.1        | 614                        | 1.2     | 1.1     | 0.3        | AT5G48850  | male sterility MS5 family                                                  |
| 5  | 250296_at   | 896                        | 0.5     | 0.1     | 0.3        | 21                         | 7.3     | 11.4    | 78.0       | AT5G12020  | class II heat shock protein                                                |
| 6  | 260978_at   | 736                        | 0.6     | 0.1     | 0.2        | 14                         | 2.6     | 4.1     | 20.5       | AT1G53540  | 17.6 kDa heat shock protein (AA 1-156)                                     |
| 7  | 260869_at   | 188                        | 0.8     | 0.1     | 0.4        | 146                        | 0.7     | 1.5     | 0.7        | AT1G43800  | acyl-(acyl-carrier-protein) desaturase (stearoyl-ACP desaturase), putative |
| 8  | 257460_at   | 164                        | 0.5     | 0.2     | 0.1        | 91                         | 0.8     | 1.0     | 0.2        | AT1G75580  | auxin-induced (indole-3-acetic acid induced) protein, putative             |
| 9  | 263970_at   | 81                         | 0.5     | 0.2     | 0.6        | 59                         | 1.1     | 0.2     | 0.1        | AT2G42850  | cytochrome P450 family                                                     |
| 10 | 255807_at   | 81                         | 0.8     | 0.2     | 0.5        | 94                         | 1.2     | 1.1     | 0.8        | AT4G10270  | probable wound-induced protein                                             |
| 11 | 247600_at   | 758                        | 0.3     | 0.2     | 0.2        | 633                        | 1.0     | 0.8     | 0.4        | AT5G60890  | receptor-like protein kinase(ATR1), putative                               |
| 12 | 246000_at   | 141                        | 0.5     | 0.2     | 0.5        | 75                         | 1.4     | 1.5     | 1.1        | AT5G20820  | auxin-induced (indole-3-acetic acid induced) protein-related               |
| 13 | 250351_at   | 1098                       | 0.5     | 0.2     | 0.4        | 26                         | 1.5     | 3.2     | 40.6       | AT5G12030  | heat shock protein 17.6A                                                   |
| 14 | 263150_at   | 888                        | 0.5     | 0.2     | 0.4        | 112                        | 0.8     | 1.0     | 2.4        | AT1G54050  | heat shock hsp20 protein family                                            |
| 15 | 250613_at   | 412                        | 0.5     | 0.2     | 0.4        | 424                        | 1.2     | 1.1     | 0.5        | AT5G07240  | expressed protein                                                          |
| 16 | 259790_s_at | 384                        | 0.5     | 0.3     | 0.4        | 105                        | 0.8     | 0.5     | 0.2        | AT1G29430  | auxin-induced (indole-3-acetic acid induced) protein family                |
| 17 | 255604_at   | 939                        | 0.5     | 0.3     | 0.1        | 1662                       | 1.1     | 0.9     | 0.2        | AT4G01080  | expressed protein                                                          |
| 18 | 266912_at   | 182                        | 0.4     | 0.3     | 0.4        | 174                        | 1.3     | 0.9     | 0.2        | AT2G45900  | expressed protein                                                          |
| 19 | 261177_at   | 1308                       | 0.6     | 0.3     | 0.1        | 1339                       | 1.0     | 1.1     | 0.7        | AT1G04770  | male sterility MS5 family                                                  |
| 20 | 252515_at   | 649                        | 1.4     | 0.3     | 0.4        | 26                         | 1.2     | 13.3    | 59.7       | AT3G46230  | class I heat shock protein(HSP 17.4)                                       |
| 21 | 254550_at   | 192                        | 0.4     | 0.3     | 0.2        | 1412                       | 0.7     | 0.1     | 0.0        | AT4G19690  | iron-regulated transporter (IRT1)                                          |
| 22 | 257858_at   | 2238                       | 0.5     | 0.3     | 0.2        | 1139                       | 1.0     | 0.6     | 0.6        | AT3G12920  | expressed protein                                                          |
| 23 | 259773_at   | 187                        | 0.6     | 0.3     | 0.4        | 86                         | 0.7     | 0.2     | 0.0        | AT1G29500  | auxin-induced (indole-3-acetic acid induced) protein, putative             |
| 24 | 261768_at   | 344                        | 0.4     | 0.3     | 0.5        | 577                        | 1.4     | 1.1     | 0.3        | AT1G15550  | gibberellin 3-beta-dioxygenase (gibberellin 3 beta-hydroxylase) (GA4)      |
| 25 | 262307_at   | 306                        | 0.6     | 0.3     | 0.2        | 34                         | 0.6     | 17.0    | 74.9       | AT1G71000  | DnaJ protein family                                                        |
| 26 | 262236_at   | 309                        | 0.5     | 0.3     | 0.4        | 238                        | 0.8     | 0.5     | 0.2        | AT1G48330  | expressed protein                                                          |
| 27 | 253301_at   | 636                        | 0.4     | 0.3     | 0.3        | 340                        | 0.4     | 0.3     | 0.8        | AT4G33720  | pathogenesis-related protein, putative                                     |
| 28 | 257890_s_at | 283                        | 0.8     | 0.3     | 0.2        | 246                        | 1.0     | 0.6     | 0.5        | AT3G42570  | peroxidase-related                                                         |
| 29 | 249575_at   | 222                        | 0.9     | 0.3     | 0.5        | 55                         | 1.1     | 2.7     | 4.2        | AT5G37670  | heat shock protein family                                                  |
| 30 | 259528_at   | 213                        | 0.6     | 0.3     | 0.4        | 250                        | 1.1     | 1.0     | 0.4        | AT1G12330  | expressed protein                                                          |

|    |           |      |     |     |     |      |     |       |       |           |                                                                            |
|----|-----------|------|-----|-----|-----|------|-----|-------|-------|-----------|----------------------------------------------------------------------------|
| 31 | 248657_at | 2151 | 0.7 | 0.3 | 0.3 | 158  | 1.3 | 3.4   | 8.5   | AT5G48570 | peptidylprolyl isomerase                                                   |
| 32 | 266820_at | 1082 | 0.7 | 0.3 | 0.2 | 538  | 1.0 | 0.6   | 0.2   | AT2G44940 | AP2 domain transcription factor TINY, putative                             |
| 33 | 254059_at | 573  | 1.1 | 0.3 | 0.4 | 21   | 4.7 | 106.3 | 674.6 | AT4G25200 | mitochondrion-localized small heat shock protein                           |
| 34 | 261226_at | 1891 | 0.5 | 0.3 | 0.4 | 1196 | 1.1 | 0.3   | 0.3   | AT1G20190 | expansin, putative (EXP11)                                                 |
| 35 | 254693_at | 423  | 0.6 | 0.4 | 0.2 | 260  | 1.3 | 1.0   | 0.5   | AT4G17880 | bHLH protein family                                                        |
| 36 | 260248_at | 681  | 0.8 | 0.4 | 0.2 | 130  | 0.8 | 1.7   | 3.1   | AT1G74310 | heat shock protein 101 (HSP101)                                            |
| 37 | 255284_at | 1491 | 0.7 | 0.4 | 0.4 | 2551 | 1.1 | 1.0   | 0.8   | AT4G04610 | 5'-adenylylsulfate reductase                                               |
| 38 | 252965_at | 894  | 0.4 | 0.4 | 0.6 | 284  | 1.0 | 0.7   | 0.3   | AT4G38860 | auxin-induced (indole-3-acetic acid induced) protein, putative             |
| 39 | 258930_at | 73   | 0.8 | 0.4 | 0.6 | 60   | 0.8 | 1.0   | 0.5   | AT3G10040 | expressed protein                                                          |
| 40 | 257506_at | 117  | 0.6 | 0.4 | 0.8 | 59   | 0.6 | 0.3   | 0.2   | AT1G29440 | auxin-induced (indole-3-acetic acid induced) protein family                |
| 41 | 249278_at | 645  | 0.9 | 0.4 | 0.2 | 323  | 1.1 | 0.8   | 0.5   | AT5G41900 | hydrolase, alpha/beta fold family                                          |
| 42 | 248839_at | 359  | 0.5 | 0.4 | 0.2 | 326  | 1.1 | 0.7   | 0.2   | AT5G46690 | bHLH protein family                                                        |
| 43 | 254332_at | 285  | 0.9 | 0.4 | 0.2 | 270  | 1.1 | 0.9   | 0.4   | AT4G22730 | leucine-rich repeat transmembrane protein kinase, putative                 |
| 44 | 266294_at | 1771 | 0.8 | 0.4 | 0.4 | 171  | 1.0 | 2.9   | 6.6   | AT2G29500 | small heat shock protein -related                                          |
| 45 | 249383_at | 380  | 0.7 | 0.4 | 0.3 | 130  | 1.1 | 0.4   | 0.4   | AT5G39860 | bHLH protein                                                               |
| 46 | 247880_at | 583  | 0.8 | 0.4 | 0.3 | 494  | 1.2 | 0.6   | 0.3   | AT5G57780 | expressed protein                                                          |
| 47 | 261883_at | 328  | 0.7 | 0.4 | 0.4 | 245  | 1.1 | 0.8   | 0.4   | AT1G80870 | protein kinase family                                                      |
| 48 | 261834_at | 410  | 0.5 | 0.4 | 0.6 | 325  | 1.1 | 0.7   | 0.4   | AT1G10640 | polygalacturonase, putative                                                |
| 49 | 257334_at | 279  | 0.5 | 0.4 | 0.4 | 344  | 1.1 | 1.1   | 0.7   | AtMg01370 | ORF111D                                                                    |
| 50 | 265880_at | 334  | 0.6 | 0.4 | 0.4 | 248  | 0.9 | 1.0   | 0.6   | AT2G42300 | bHLH protein family                                                        |
| 51 | 245501_at | 264  | 0.8 | 0.4 | 0.4 | 1278 | 1.1 | 0.7   | 0.6   | AT4G15620 | expressed protein                                                          |
| 52 | 266418_at | 1336 | 0.7 | 0.4 | 0.2 | 1196 | 1.1 | 0.7   | 0.3   | AT2G38750 | annexin -related                                                           |
| 53 | 253736_at | 550  | 0.7 | 0.4 | 0.3 | 1043 | 0.9 | 0.5   | 0.1   | AT4G28780 | GDSL-motif lipase/hydrolase protein                                        |
| 54 | 255028_at | 192  | 0.6 | 0.4 | 0.4 | 325  | 1.2 | 0.9   | 0.4   | AT4G09890 | expressed protein                                                          |
| 55 | 245341_at | 310  | 0.7 | 0.4 | 0.2 | 300  | 1.0 | 1.0   | 0.5   | AT4G16447 | expressed protein                                                          |
| 56 | 252972_at | 2190 | 0.6 | 0.4 | 0.5 | 1912 | 0.9 | 0.6   | 0.2   | AT4G38840 | auxin-induced (indole-3-acetic acid induced) protein, putative             |
| 57 | 258552_at | 657  | 0.7 | 0.4 | 0.5 | 471  | 0.9 | 0.5   | 0.5   | AT3G07010 | polysaccharide lyase family 1 (pectate lyase)                              |
| 58 | 251174_at | 881  | 0.7 | 0.4 | 0.4 | 1039 | 1.2 | 1.0   | 0.5   | AT3G63200 | patatin-related                                                            |
| 59 | 264415_at | 180  | 1.0 | 0.4 | 0.4 | 57   | 1.3 | 1.6   | 0.9   | AT1G43160 | AP2 domain transcription factor RAP2.6                                     |
| 60 | 262811_at | 389  | 0.6 | 0.4 | 0.2 | 443  | 1.1 | 1.1   | 0.4   | AT1G11700 | expressed protein                                                          |
| 61 | 251169_at | 431  | 0.6 | 0.4 | 0.3 | 461  | 1.1 | 1.1   | 0.6   | AT3G63210 | senescence-associated protein SAG102                                       |
| 62 | 245750_at | 4848 | 0.7 | 0.4 | 0.3 | 4214 | 1.0 | 0.8   | 0.5   | AT1G51060 | histone H2A, putative                                                      |
| 63 | 249035_at | 1236 | 0.9 | 0.4 | 0.4 | 212  | 1.2 | 1.2   | 1.2   | AT5G44190 | myb family transcription factor                                            |
| 64 | 261480_at | 1080 | 0.9 | 0.4 | 0.6 | 201  | 1.0 | 0.8   | 0.5   | AT1G14280 | phytochrome kinase substrate 1 -related                                    |
| 65 | 253578_at | 528  | 0.9 | 0.4 | 0.2 | 291  | 1.0 | 0.8   | 0.7   | AT4G30340 | expressed protein                                                          |
| 66 | 264745_at | 2246 | 0.8 | 0.4 | 0.4 | 2164 | 0.9 | 1.0   | 0.7   | AT1G62180 | phosphoadenylyl-sulfate reductase (thioredoxin) (PAPS reductase), putative |
| 67 | 252970_at | 195  | 0.5 | 0.4 | 0.8 | 93   | 0.8 | 0.4   | 0.2   | AT4G38850 | small auxin up RNA (SAUR-AC1)                                              |

|     |             |      |     |     |     |      |     |     |      |           |                                                               |
|-----|-------------|------|-----|-----|-----|------|-----|-----|------|-----------|---------------------------------------------------------------|
| 68  | 252562_s_at | 199  | 0.6 | 0.4 | 0.6 | 257  | 1.0 | 0.8 | 0.5  | AT3G45930 | histone H4                                                    |
| 69  | 260830_at   | 2269 | 0.6 | 0.4 | 0.4 | 1809 | 1.1 | 0.9 | 0.9  | AT1G06760 | histone H1, putative                                          |
| 70  | 250734_at   | 975  | 0.7 | 0.4 | 0.2 | 837  | 1.0 | 0.5 | 0.2  | AT5G06270 | B-type cyclin -related                                        |
| 71  | 250968_at   | 444  | 0.7 | 0.4 | 0.4 | 551  | 1.0 | 0.4 | 0.1  | AT5G02890 | transferase family                                            |
| 72  | 250304_at   | 1864 | 0.8 | 0.4 | 0.4 | 770  | 1.1 | 1.1 | 0.6  | AT5G12110 | elongation factor 1B alpha-subunit (emb CAB64729.1)           |
| 73  | 253317_at   | 439  | 0.5 | 0.4 | 0.4 | 823  | 1.1 | 0.8 | 0.3  | AT4G33960 | expressed protein                                             |
| 74  | 261975_at   | 664  | 0.9 | 0.4 | 0.3 | 513  | 0.8 | 0.6 | 0.4  | AT1G64640 | plastocyanin-like domain containing protein                   |
| 75  | 246144_at   | 380  | 0.6 | 0.4 | 0.3 | 128  | 1.1 | 1.3 | 1.3  | AT5G20110 | dynein light chain - like protein                             |
| 76  | 245574_at   | 256  | 0.7 | 0.4 | 0.5 | 149  | 0.8 | 0.8 | 0.6  | AT4G14750 | expressed protein                                             |
| 77  | 247696_at   | 682  | 0.7 | 0.4 | 0.5 | 440  | 0.9 | 0.7 | 0.4  | AT5G59780 | myb family transcription factor                               |
| 78  | 249008_at   | 956  | 0.6 | 0.4 | 0.5 | 725  | 0.9 | 0.7 | 0.4  | AT5G44680 | expressed protein                                             |
| 79  | 247914_at   | 361  | 0.5 | 0.4 | 0.3 | 372  | 1.4 | 0.9 | 0.1  | AT5G57540 | xyloglucan endotransglycosylase, putative                     |
| 80  | 248332_at   | 2375 | 0.9 | 0.5 | 0.3 | 475  | 0.9 | 3.9 | 14.1 | AT5G52640 | heat shock protein 81-1 (HSP81-1/heat shock protein 83/HSP83) |
| 81  | 260491_at   | 296  | 0.9 | 0.5 | 0.2 | 148  | 1.3 | 1.4 | 0.7  | AT1G51440 | lipase (class 3) family                                       |
| 82  | 261838_at   | 891  | 0.8 | 0.5 | 0.3 | 318  | 0.9 | 1.1 | 1.4  | AT1G16030 | heat shock protein hsp70b                                     |
| 83  | 254119_at   | 3383 | 0.6 | 0.5 | 0.5 | 3461 | 1.0 | 0.7 | 0.3  | AT4G24780 | polysaccharide lyase family 1 (pectate lyase)                 |
| 84  | 248191_at   | 444  | 0.8 | 0.5 | 0.4 | 239  | 1.1 | 1.3 | 0.9  | AT5G54130 | calcium-binding EF-hand family protein                        |
| 85  | 253920_at   | 1474 | 0.7 | 0.5 | 0.5 | 1321 | 1.1 | 1.0 | 0.6  | AT4G27230 | histone H2A, putative                                         |
| 86  | 246149_at   | 1013 | 0.6 | 0.5 | 0.4 | 957  | 0.8 | 0.4 | 0.2  | AT5G19890 | peroxidase, putative                                          |
| 87  | 251924_at   | 1674 | 0.7 | 0.5 | 0.5 | 1905 | 1.0 | 0.8 | 0.5  | AT3G53730 | histone H4                                                    |
| 88  | 251058_at   | 1006 | 0.8 | 0.5 | 0.3 | 795  | 1.0 | 0.9 | 0.3  | AT5G01790 | expressed protein                                             |
| 89  | 267535_at   | 965  | 0.9 | 0.5 | 0.3 | 677  | 0.9 | 0.8 | 0.5  | AT2G41940 | C2H2-type zinc finger protein -related                        |
| 90  | 267361_at   | 343  | 0.6 | 0.5 | 0.8 | 309  | 1.0 | 1.0 | 0.5  | AT2G39920 | expressed protein                                             |
| 91  | 256626_at   | 332  | 0.7 | 0.5 | 0.5 | 479  | 1.2 | 0.9 | 0.6  | AT3G20015 | expressed protein                                             |
| 92  | 258919_at   | 682  | 0.7 | 0.5 | 0.6 | 957  | 1.0 | 1.1 | 0.5  | AT3G10525 | expressed protein                                             |
| 93  | 246997_at   | 192  | 0.6 | 0.5 | 0.7 | 97   | 1.3 | 0.7 | 0.3  | AT5G67390 | expressed protein                                             |
| 94  | 251060_at   | 594  | 0.6 | 0.5 | 0.3 | 367  | 1.0 | 0.8 | 0.6  | AT5G01820 | CBL-interacting protein kinase 14                             |
| 95  | 246986_at   | 1110 | 0.7 | 0.5 | 0.3 | 1427 | 1.0 | 0.8 | 0.3  | AT5G67280 | leucine-rich repeat transmembrane protein kinase, putative    |
| 96  | 246483_at   | 455  | 0.6 | 0.5 | 0.4 | 419  | 0.9 | 0.8 | 0.4  | AT5G16000 | receptor protein kinase-related protein                       |
| 97  | 255814_at   | 266  | 0.7 | 0.5 | 0.6 | 129  | 1.1 | 0.7 | 0.3  | AT1G19900 | expressed protein                                             |
| 98  | 261420_at   | 1619 | 1.0 | 0.5 | 0.3 | 1035 | 1.0 | 0.8 | 0.7  | AT1G07720 | beta-ketoacyl-CoA synthase family                             |
| 99  | 261502_at   | 375  | 0.8 | 0.5 | 0.6 | 236  | 1.1 | 0.9 | 0.6  | AT1G14440 | expressed protein                                             |
| 100 | 260753_at   | 442  | 0.6 | 0.5 | 0.4 | 241  | 1.1 | 1.0 | 0.6  | AT1G49230 | RING-H2 finger protein RHA3a -related                         |
| 101 | 252272_at   | 1935 | 0.8 | 0.5 | 0.3 | 1059 | 0.9 | 0.6 | 0.4  | AT3G49670 | leucine-rich repeat transmembrane protein kinase, putative    |
| 102 | 245078_at   | 442  | 0.8 | 0.5 | 0.3 | 699  | 0.9 | 1.1 | 0.7  | AT2G23340 | AP2 domain transcription factor, putative                     |
| 103 | 248646_at   | 611  | 0.6 | 0.5 | 0.5 | 553  | 1.1 | 0.7 | 0.4  | AT5G49100 | expressed protein                                             |
| 104 | 251025_at   | 333  | 0.6 | 0.5 | 0.3 | 169  | 1.1 | 0.7 | 0.4  | AT5G02190 | expressed protein                                             |

|            |           |      |     |     |     |      |     |     |     |           |                                                            |
|------------|-----------|------|-----|-----|-----|------|-----|-----|-----|-----------|------------------------------------------------------------|
| <b>105</b> | 257294_at | 714  | 0.5 | 0.5 | 1.0 | 700  | 1.1 | 0.9 | 0.4 | AT3G15570 | non-phototropic hypocotyl protein -related                 |
| <b>106</b> | 249410_at | 512  | 0.8 | 0.5 | 0.4 | 388  | 0.9 | 0.6 | 0.4 | AT5G40380 | receptor-related protein kinase                            |
| <b>107</b> | 261684_at | 2113 | 0.7 | 0.5 | 0.2 | 4000 | 1.2 | 0.5 | 0.2 | AT1G47400 | hypothetical protein                                       |
| <b>108</b> | 260081_at | 2231 | 1.0 | 0.5 | 0.1 | 886  | 0.8 | 0.6 | 0.3 | AT1G78170 | expressed protein                                          |
| <b>109</b> | 247461_at | 238  | 1.0 | 0.5 | 0.4 | 149  | 1.2 | 0.9 | 0.5 | AT5G62100 | BAG domain containing protein                              |
| <b>110</b> | 245965_at | 462  | 0.7 | 0.5 | 0.5 | 426  | 1.2 | 0.8 | 0.4 | AT5G19730 | pectinesterase family                                      |
| <b>111</b> | 263914_at | 422  | 0.8 | 0.5 | 0.4 | 156  | 1.2 | 1.1 | 1.4 | AT2G36400 | transcription activator (GRL3)                             |
| <b>112</b> | 259348_at | 307  | 0.7 | 0.5 | 0.5 | 734  | 1.1 | 0.9 | 0.4 | AT3G03770 | leucine-rich repeat transmembrane protein kinase, putative |
| <b>113</b> | 246911_at | 435  | 0.7 | 0.5 | 0.3 | 481  | 1.1 | 0.8 | 0.5 | AT5G25810 | AP2 domain transcription factor TINY                       |
| <b>114</b> | 264348_at | 2645 | 0.6 | 0.5 | 0.5 | 3724 | 0.9 | 0.7 | 0.5 | AT1G12110 | putative NPK1-related protein kinase 2                     |
| <b>115</b> | 263715_at | 1121 | 0.7 | 0.5 | 0.5 | 930  | 0.9 | 1.0 | 0.8 | AT2G20570 | golden2-related transcription factor (GLK1)                |
| <b>116</b> | 250569_at | 1099 | 1.1 | 0.5 | 0.4 | 541  | 1.0 | 0.9 | 0.7 | AT5G08130 | bHLH protein family                                        |
| <b>117</b> | 248175_at | 969  | 0.6 | 0.5 | 0.4 | 686  | 1.2 | 1.1 | 1.9 | AT5G54640 | histone H2A                                                |

Fold induction for 305-1h is averaged from four independent ATH-1 array hybridizations, all others from two independent array hybridizations. Applied threshold is 2-fold. Annotation June 15, 2003.
