# Supplementary material
Source: PubMed Central journal article supplement (PMC337064)
Supplement: pnas_0308044100_5.pdf [file pnas_0308044100_5.pdf]

**Table 5. Quartz\_1hr\_increase**

|    | Probe set   | Fold induction             |         |         |            | Fold induction             |         |         |            | Identifier |                                                             |
|----|-------------|----------------------------|---------|---------|------------|----------------------------|---------|---------|------------|------------|-------------------------------------------------------------|
|    |             | Expression level (327, 1h) | 305, 1h | 295, 1h | quartz, 1h | Expression level (327, 1h) | 305, 6h | 295, 6h | quartz, 6h |            |                                                             |
| 1  | 256442_at   | 3                          | 6.9     | 60.0    | 308.7      | 17                         | 0.7     | 6.2     | 40.1       | AT3G10930  | expressed protein                                           |
| 2  | 266800_at   | 35                         | 1.0     | 49.0    | 166.8      | 6                          | 1.4     | 1.1     | 47.4       | AT2G22880  | hypothetical protein                                        |
| 3  | 248322_at   | 20                         | 1.2     | 68.9    | 159.8      | 20                         | 0.3     | 3.3     | 70.8       | AT5G52760  | heavy-metal-associated domain-containing protein            |
| 4  | 253044_at   | 24                         | 3.3     | 96.8    | 131.9      | 7                          | 7.4     | 2.9     | 41.0       | AT4G37290  | expressed protein                                           |
| 5  | 251400_at   | 10                         | 2.2     | 77.0    | 123.4      | 82                         | 1.2     | 1.6     | 20.2       | AT3G60420  | expressed protein                                           |
| 6  | 261899_at   | 43                         | 2.0     | 28.2    | 106.7      | 16                         | 1.0     | 3.9     | 74.1       | AT1G80820  | cinnamoyl-CoA reductase, putative                           |
| 7  | 249197_at   | 7                          | 1.6     | 44.1    | 97.9       | 9                          | 0.7     | 1.6     | 34.5       | AT5G42380  | calmodulin-related protein, putative                        |
| 8  | 266821_at   | 7                          | 1.9     | 35.6    | 90.2       | 20                         | 1.5     | 0.4     | 8.5        | AT2G44840  | ethylene response element binding protein (EREBP), putative |
| 9  | 245082_at   | 18                         | 1.3     | 26.7    | 84.2       | 11                         | 5.3     | 8.3     | 75.2       | AT2G23270  | expressed protein                                           |
| 10 | 260040_at   | 3                          | 3.6     | 60.7    | 83.3       | 16                         | 2.5     | 2.3     | 25.7       | AT1G68765  | expressed protein                                           |
| 11 | 258947_at   | 27                         | 1.1     | 30.3    | 65.9       | 16                         | 4.8     | 9.9     | 199.9      | AT3G01830  | calmodulin-related protein, putative                        |
| 12 | 252734_at   | 24                         | 1.7     | 28.7    | 62.9       | 52                         | 0.8     | 0.4     | 5.3        | AT3G43160  | hypothetical protein                                        |
| 13 | 265597_at   | 40                         | 2.0     | 39.5    | 60.1       | 52                         | 1.1     | 1.8     | 23.5       | AT2G20145  | disease resistance protein (TIR class), putative            |
| 14 | 246405_at   | 6                          | 3.9     | 18.5    | 58.3       | 9                          | 2.2     | 7.9     | 270.8      | AT1G57630  | disease resistance protein (TIR class), putative            |
| 15 | 260804_at   | 10                         | 1.5     | 32.3    | 57.6       | 17                         | 1.0     | 2.2     | 34.4       | AT1G78410  | expressed protein                                           |
| 16 | 245250_at   | 31                         | 1.6     | 41.4    | 57.6       | 19                         | 1.5     | 13.1    | 37.8       | AT4G17490  | ethylene responsive element binding factor (ERF6)           |
| 17 | 266010_at   | 48                         | 2.0     | 21.4    | 51.2       | 60                         | 0.9     | 0.8     | 11.3       | AT2G37430  | C2H2-type zinc finger protein -related                      |
| 18 | 263182_at   | 88                         | 1.4     | 13.9    | 47.9       | 104                        | 1.0     | 1.0     | 6.8        | AT1G05575  | expressed protein                                           |
| 19 | 264866_at   | 23                         | 0.4     | 29.8    | 47.8       | 68                         | 1.1     | 0.6     | 7.9        | AT1G24140  | metallo proteinase -related                                 |
| 20 | 247145_at   | 5                          | 2.5     | 23.9    | 47.7       | 4                          | 2.1     | 0.8     | 70.3       | AT5G65600  | receptor protein kinase-related protein                     |
| 21 | 260522_x_at | 164                        | 6.9     | 47.7    | 47.2       | 157                        | 0.8     | 4.5     | 43.9       | AT2G41730  | expressed protein                                           |
| 22 | 264788_at   | 2                          | 13.6    | 2.1     | 46.4       | 5                          | 8.7     | 1.1     | 5.9        | AT2G17880  | J11 protein, putative                                       |
| 23 | 252131_at   | 98                         | 2.6     | 41.3    | 42.0       | 109                        | 0.7     | 1.9     | 31.4       | AT3G50930  | AAA-type ATPase family                                      |
| 24 | 262072_at   | 19                         | 5.6     | 36.3    | 41.6       | 12                         | 2.0     | 1.5     | 42.0       | AT1G59590  | expressed protein                                           |
| 25 | 259879_at   | 31                         | 1.4     | 31.0    | 41.1       | 43                         | 1.9     | 1.4     | 13.6       | AT1G76650  | calcium-binding EF-hand family protein                      |
| 26 | 261648_at   | 217                        | 2.4     | 21.5    | 34.1       | 159                        | 1.2     | 2.1     | 13.0       | AT1G27730  | salt-tolerance zinc finger protein                          |
| 27 | 249065_at   | 9                          | 0.6     | 15.9    | 33.7       | 14                         | 1.7     | 2.0     | 15.2       | AT5G44260  | expressed protein                                           |
| 28 | 245976_at   | 21                         | 8.9     | 22.5    | 31.6       | 4                          | 2.1     | 8.0     | 43.5       | AT5G13080  | WRKY family transcription factor                            |
| 29 | 253632_at   | 24                         | 4.1     | 12.9    | 31.4       | 24                         | 2.6     | 2.2     | 12.0       | AT4G30430  | senescence-associated protein family                        |
| 30 | 254062_at   | 7                          | 3.9     | 20.3    | 30.7       | 47                         | 0.4     | 0.8     | 6.1        | AT4G25380  | hypothetical protein                                        |
| 31 | 245755_at   | 35                         | 1.5     | 19.0    | 30.7       | 33                         | 1.5     | 1.0     | 11.4       | AT1G35210  | expressed protein                                           |

|    |           |     |     |      |      |     |     |      |       |           |                                                        |
|----|-----------|-----|-----|------|------|-----|-----|------|-------|-----------|--------------------------------------------------------|
| 32 | 248164_at | 91  | 1.4 | 16.5 | 30.6 | 127 | 0.7 | 0.7  | 5.3   | AT5G54490 | calcium-binding protein, putative                      |
| 33 | 260399_at | 15  | 1.4 | 23.3 | 30.6 | 43  | 0.1 | 0.7  | 2.8   | AT1G72520 | lipoxygenase (LOX), putative                           |
| 34 | 258377_at | 7   | 4.7 | 23.1 | 30.0 | 25  | 0.2 | 0.3  | 5.9   | AT3G17690 | cyclic nucleotide-binding transporter 2 (CNBT2/CNGC19) |
| 35 | 257846_at | 4   | 4.3 | 6.4  | 29.7 | 22  | 3.5 | 6.3  | 16.2  | AT3G12910 | expressed protein                                      |
| 36 | 266246_at | 9   | 1.5 | 14.2 | 29.2 | 11  | 0.8 | 0.6  | 6.0   | AT2G27690 | cytochrome P450, putative                              |
| 37 | 252345_at | 27  | 5.0 | 9.9  | 27.7 | 37  | 4.1 | 12.9 | 120.0 | AT3G48640 | hypothetical protein                                   |
| 38 | 262213_at | 21  | 1.0 | 25.4 | 27.6 | 22  | 2.6 | 1.0  | 64.5  | AT1G74870 | conserved hypothetical protein                         |
| 39 | 265725_at | 38  | 2.5 | 17.7 | 27.3 | 21  | 3.0 | 5.2  | 42.5  | AT2G32030 | GCN5-related N-acetyltransferase (GNAT) family         |
| 40 | 253046_at | 83  | 2.3 | 23.2 | 27.3 | 57  | 1.3 | 4.2  | 60.8  | AT4G37370 | cytochrome P450, putative                              |
| 41 | 262085_at | 65  | 1.7 | 10.8 | 27.2 | 105 | 0.7 | 0.8  | 12.2  | AT1G56060 | hypothetical protein                                   |
| 42 | 249770_at | 35  | 2.5 | 14.2 | 27.2 | 29  | 0.1 | 0.9  | 25.2  | AT5G24110 | WRKY family transcription factor                       |
| 43 | 246821_at | 45  | 3.4 | 17.9 | 26.7 | 47  | 1.5 | 1.9  | 22.7  | AT5G26920 | calmodulin-binding protein                             |
| 44 | 264042_at | 163 | 5.4 | 30.3 | 25.7 | 157 | 0.8 | 5.8  | 36.7  | AT2G03760 | steroid sulfotransferase, putative                     |
| 45 | 253915_at | 413 | 1.3 | 17.5 | 24.3 | 317 | 0.8 | 1.3  | 6.3   | AT4G27280 | calcium-binding EF-hand family protein                 |
| 46 | 257918_at | 28  | 3.1 | 13.8 | 23.9 | 49  | 0.4 | 0.7  | 2.3   | AT3G23230 | ethylene response factor, putative                     |
| 47 | 264202_at | 33  | 1.3 | 14.4 | 23.5 | 88  | 0.4 | 0.5  | 2.4   | AT1G22810 | AP2 domain transcription factor TINY, putative         |
| 48 | 247215_at | 24  | 2.8 | 6.0  | 23.5 | 65  | 1.2 | 0.9  | 5.0   | AT5G64905 | expressed protein                                      |
| 49 | 257919_at | 31  | 2.1 | 8.1  | 22.9 | 54  | 0.4 | 0.7  | 3.1   | AT3G23250 | myb family transcription factor(MYB15)                 |
| 50 | 265797_at | 6   | 3.7 | 14.1 | 22.8 | 5   | 1.1 | 1.4  | 3.6   | AT2G35715 | expressed protein                                      |
| 51 | 246293_at | 85  | 2.1 | 15.7 | 22.2 | 124 | 0.7 | 1.3  | 12.0  | AT3G56710 | SigA binding protein                                   |
| 52 | 247949_at | 55  | 2.5 | 17.5 | 21.6 | 43  | 1.2 | 2.8  | 20.6  | AT5G57220 | cytochrome P450, putative                              |
| 53 | 253737_at | 29  | 1.1 | 7.0  | 21.5 | 38  | 3.1 | 0.9  | 7.9   | AT4G28703 | expressed protein                                      |
| 54 | 259479_at | 326 | 1.9 | 12.4 | 20.9 | 235 | 0.7 | 1.2  | 20.6  | AT1G19020 | expressed protein                                      |
| 55 | 245173_at | 13  | 4.2 | 15.0 | 20.9 | 15  | 1.6 | 5.1  | 25.2  | AT2G47520 | AP2 domain transcription factor, putative              |
| 56 | 256306_at | 51  | 1.6 | 9.5  | 20.2 | 63  | 0.8 | 0.9  | 9.2   | AT1G30370 | lipase (class 3) family                                |
| 57 | 262382_at | 30  | 0.9 | 10.5 | 19.3 | 102 | 0.5 | 1.4  | 1.4   | AT1G72920 | disease resistance protein (TIR-NBS class), putative   |
| 58 | 249001_at | 5   | 1.5 | 9.1  | 19.0 | 16  | 1.0 | 2.0  | 26.3  | AT5G44990 | hypothetical protein                                   |
| 59 | 248448_at | 120 | 1.1 | 11.7 | 18.7 | 85  | 0.8 | 1.1  | 2.2   | AT5G51190 | AP2 domain transcription factor, putative              |
| 60 | 246349_at | 9   | 1.8 | 8.5  | 18.7 | 2   | 1.2 | 7.5  | 67.7  | AT1G51915 | expressed protein                                      |
| 61 | 255753_at | 86  | 2.3 | 15.3 | 18.6 | 75  | 1.6 | 1.8  | 13.7  | AT1G18570 | myb family transcription factor                        |
| 62 | 254120_at | 168 | 1.3 | 9.6  | 18.3 | 126 | 0.8 | 0.9  | 3.9   | AT4G24570 | mitochondrial carrier protein family                   |
| 63 | 248775_at | 19  | 2.5 | 3.4  | 18.3 | 24  | 0.9 | 0.2  | 10.3  | AT5G47850 | protein kinase, putative                               |
| 64 | 249417_at | 66  | 1.1 | 10.0 | 18.2 | 47  | 1.2 | 1.9  | 19.1  | AT5G39670 | calcium-binding EF-hand family protein                 |
| 65 | 253181_at | 10  | 2.7 | 14.2 | 17.9 | 58  | 0.6 | 0.7  | 9.0   | AT4G35180 | amino acid transporter family                          |
| 66 | 245041_at | 179 | 1.2 | 11.9 | 17.7 | 159 | 0.9 | 0.9  | 7.5   | AT2G26530 | AR781, similar to yeast pheromone receptor             |
| 67 | 264758_at | 53  | 3.0 | 9.3  | 17.5 | 35  | 0.5 | 1.2  | 12.5  | AT1G61340 | F-box protein family                                   |
| 68 | 248327_at | 123 | 1.4 | 9.9  | 16.7 | 132 | 0.7 | 1.2  | 9.4   | AT5G52750 | heavy-metal-associated domain-containing protein       |

|     |             |     |      |      |      |     |      |      |       |           |                                                                          |
|-----|-------------|-----|------|------|------|-----|------|------|-------|-----------|--------------------------------------------------------------------------|
| 69  | 252679_at   | 53  | 0.6  | 9.4  | 16.3 | 70  | 1.1  | 1.4  | 3.1   | AT3G44260 | CCR4-associated factor 1-related protein                                 |
| 70  | 257840_at   | 84  | 3.1  | 14.2 | 16.0 | 118 | 0.9  | 1.1  | 5.4   | AT3G25250 | protein kinase family                                                    |
| 71  | 251336_at   | 42  | 1.5  | 7.3  | 15.5 | 59  | 1.1  | 1.2  | 5.9   | AT3G61190 | BON1-associated protein 1 (BAP1)                                         |
| 72  | 265668_at   | 140 | 4.3  | 14.8 | 15.4 | 127 | 1.1  | 1.3  | 7.9   | AT2G32020 | GCN5-related N-acetyltransferase (GNAT) family                           |
| 73  | 251745_at   | 169 | 1.5  | 15.3 | 15.3 | 186 | 1.0  | 0.8  | 3.5   | AT3G55980 | expressed protein                                                        |
| 74  | 260023_at   | 83  | 10.6 | 28.2 | 15.1 | 102 | 1.5  | 1.5  | 4.0   | AT1G30040 | gibberellin 2-oxidase (GA2-oxidase) (ga2ox2)                             |
| 75  | 247543_at   | 101 | 1.5  | 12.7 | 15.0 | 79  | 1.1  | 2.2  | 3.7   | AT5G61600 | AP2 domain transcription factor, putative                                |
| 76  | 267028_at   | 395 | 1.9  | 14.9 | 14.9 | 346 | 1.1  | 1.1  | 9.6   | AT2G38470 | WRKY family transcription factor                                         |
| 77  | 263231_at   | 108 | 3.2  | 17.2 | 14.9 | 166 | 0.8  | 4.2  | 20.0  | AT1G05680 | glycosyltransferase family                                               |
| 78  | 253832_at   | 31  | 1.3  | 4.5  | 14.7 | 24  | 2.6  | 2.0  | 3.1   | AT4G27654 | expressed protein                                                        |
| 79  | 261892_at   | 125 | 1.2  | 8.7  | 14.5 | 121 | 0.6  | 0.9  | 5.5   | AT1G80840 | WRKY family transcription factor                                         |
| 80  | 251705_at   | 71  | 1.4  | 8.0  | 14.4 | 92  | 1.0  | 1.4  | 29.8  | AT3G56400 | WRKY family transcription factor                                         |
| 81  | 254443_at   | 34  | 17.2 | 16.5 | 14.4 | 54  | 1.6  | 3.7  | 5.5   | AT4G21070 | BRCT domain-containing protein                                           |
| 82  | 258792_at   | 176 | 1.1  | 4.8  | 14.0 | 189 | 0.8  | 1.1  | 9.9   | AT3G04640 | glycine-rich protein                                                     |
| 83  | 257478_at   | 35  | 3.3  | 13.8 | 13.9 | 24  | 0.7  | 0.3  | 8.7   | AT1G16130 | WAK-like kinase (WLK)                                                    |
| 84  | 246370_at   | 43  | 2.1  | 6.8  | 13.8 | 83  | 1.0  | 1.4  | 10.5  | AT1G51920 | hypothetical protein                                                     |
| 85  | 262381_at   | 132 | 1.8  | 10.8 | 13.5 | 151 | 1.1  | 1.5  | 6.6   | AT1G72900 | disease resistance protein (TIR-NBS class), putative                     |
| 86  | 256044_at   | 9   | 1.1  | 2.4  | 13.2 | 33  | 0.3  | 0.5  | 2.8   | AT1G07160 | protein phosphatase 2C (PP2C), putative                                  |
| 87  | 247655_at   | 274 | 4.2  | 12.2 | 13.1 | 203 | 1.2  | 2.2  | 7.6   | AT5G59820 | zinc finger protein Zat12                                                |
| 88  | 264153_at   | 20  | 5.5  | 8.3  | 12.6 | 16  | 0.3  | 0.8  | 1.2   | AT1G65390 | disease resistance protein (TIR class), putative                         |
| 89  | 259979_at   | 304 | 2.0  | 10.6 | 12.6 | 344 | 1.0  | 0.9  | 2.8   | AT1G76600 | expressed protein                                                        |
| 90  | 258606_at   | 35  | 2.5  | 5.3  | 12.4 | 32  | 1.0  | 0.4  | 6.7   | AT3G02840 | expressed protein                                                        |
| 91  | 248794_at   | 48  | 1.5  | 5.0  | 12.4 | 62  | 0.6  | 1.0  | 3.4   | AT5G47220 | ethylene responsive element binding factor 2 (EREBP-2)                   |
| 92  | 260881_at   | 67  | 2.0  | 8.1  | 11.9 | 47  | 0.9  | 4.5  | 23.7  | AT1G21550 | calcium-binding protein, putative                                        |
| 93  | 266658_at   | 109 | 1.1  | 5.0  | 11.8 | 162 | 0.9  | 1.1  | 3.9   | AT2G25735 | expressed protein                                                        |
| 94  | 252908_at   | 56  | 0.9  | 7.5  | 11.7 | 47  | 1.3  | 2.9  | 33.4  | AT4G39670 | expressed protein                                                        |
| 95  | 265200_s_at | 139 | 4.7  | 13.3 | 11.6 | 144 | 1.4  | 2.6  | 5.6   | AT2G36790 | glucosyl transferase -related                                            |
| 96  | 261470_at   | 163 | 1.1  | 4.8  | 11.0 | 131 | 1.1  | 1.1  | 3.6   | AT1G28370 | ethylene responsive element binding factor 11, putative (EREBP11)(ERF11) |
| 97  | 263783_at   | 156 | 1.6  | 7.9  | 10.9 | 127 | 1.0  | 1.9  | 15.9  | AT2G46400 | WRKY family transcription factor                                         |
| 98  | 260068_at   | 27  | 2.1  | 10.5 | 10.8 | 45  | 0.8  | 1.1  | 11.3  | AT1G73805 | calmodulin-binding protein                                               |
| 99  | 251774_at   | 24  | 0.5  | 9.4  | 10.4 | 15  | 11.0 | 5.7  | 49.5  | AT3G55840 | nematode resistance protein-related protein                              |
| 100 | 263800_at   | 85  | 1.3  | 7.4  | 10.2 | 107 | 1.0  | 1.4  | 2.4   | AT2G24600 | expressed protein                                                        |
| 101 | 246777_at   | 94  | 1.2  | 6.7  | 10.1 | 97  | 0.8  | 1.0  | 5.9   | AT5G27420 | RING-H2 zinc finger protein-related                                      |
| 102 | 255941_at   | 51  | 1.8  | 4.9  | 10.0 | 5   | 5.2  | 34.2 | 170.4 | AT1G20350 | mitochondrial inner membrane translocase component -related              |
| 103 | 253643_at   | 92  | 1.3  | 5.5  | 9.9  | 97  | 0.9  | 0.9  | 5.0   | AT4G29780 | expressed protein                                                        |
| 104 | 261193_at   | 756 | 0.9  | 5.7  | 9.8  | 807 | 1.1  | 1.4  | 3.3   | AT1G32920 | expressed protein                                                        |

|            |             |      |     |      |     |     |     |     |      |           |                                                                  |
|------------|-------------|------|-----|------|-----|-----|-----|-----|------|-----------|------------------------------------------------------------------|
| <b>105</b> | 253796_at   | 64   | 1.7 | 5.0  | 9.6 | 57  | 0.9 | 1.1 | 14.6 | AT4G28460 | hypothetical protein                                             |
| <b>106</b> | 253827_at   | 50   | 1.1 | 5.3  | 9.6 | 62  | 0.9 | 0.4 | 1.7  | AT4G28085 | expressed protein                                                |
| <b>107</b> | 265674_at   | 231  | 1.4 | 5.0  | 9.4 | 235 | 0.9 | 1.1 | 8.3  | AT2G32190 | expressed protein                                                |
| <b>108</b> | 255884_at   | 55   | 1.7 | 7.5  | 9.4 | 71  | 1.0 | 1.0 | 5.7  | AT1G20310 | expressed protein                                                |
| <b>109</b> | 249777_at   | 197  | 2.1 | 6.5  | 9.3 | 215 | 1.0 | 1.6 | 8.3  | AT5G24210 | lipase (class 3) family                                          |
| <b>110</b> | 261315_at   | 46   | 1.3 | 5.2  | 9.3 | 122 | 0.6 | 0.8 | 1.4  | AT1G53170 | ethylene responsive element binding factor 8                     |
| <b>111</b> | 248392_at   | 9    | 0.8 | 8.6  | 9.3 | 22  | 1.1 | 1.3 | 3.8  | AT5G52050 | MATE efflux protein - related                                    |
| <b>112</b> | 260706_at   | 14   | 2.0 | 8.9  | 9.2 | 35  | 1.2 | 2.4 | 16.1 | AT1G32350 | alternative oxidase, putative                                    |
| <b>113</b> | 256833_at   | 22   | 1.1 | 11.8 | 9.2 | 10  | 4.3 | 5.8 | 61.2 | AT3G22910 | calcium-transporting ATPase (calcium pump), putative             |
| <b>114</b> | 254158_at   | 272  | 1.4 | 6.3  | 9.2 | 338 | 1.0 | 1.0 | 2.9  | AT4G24380 | expressed protein                                                |
| <b>115</b> | 263475_at   | 110  | 0.9 | 4.0  | 9.2 | 161 | 0.8 | 0.6 | 1.1  | AT2G31945 | expressed protein                                                |
| <b>116</b> | 252483_at   | 116  | 1.8 | 9.4  | 9.1 | 139 | 0.9 | 1.7 | 6.9  | AT3G46600 | scarecrow transcription factor family                            |
| <b>117</b> | 261443_at   | 94   | 2.0 | 4.3  | 9.1 | 138 | 0.7 | 1.0 | 6.0  | AT1G28480 | glutaredoxin protein family                                      |
| <b>118</b> | 245731_at   | 109  | 1.5 | 6.5  | 8.9 | 134 | 1.2 | 1.4 | 1.8  | AT1G73500 | mitogen-activated protein kinase kinase (MAPKK), putative (MKK9) |
| <b>119</b> | 250098_at   | 49   | 1.4 | 3.8  | 8.9 | 84  | 1.3 | 0.7 | 2.0  | AT5G17350 | expressed protein                                                |
| <b>120</b> | 260037_at   | 215  | 1.5 | 5.8  | 8.9 | 172 | 0.9 | 1.3 | 5.3  | AT1G68840 | AP2 domain protein RAP2.8 (RAV2)                                 |
| <b>121</b> | 262731_at   | 17   | 1.7 | 7.1  | 8.9 | 23  | 0.7 | 0.9 | 5.5  | AT1G16420 | hypothetical protein common family                               |
| <b>122</b> | 249928_at   | 114  | 0.8 | 4.6  | 8.6 | 160 | 0.8 | 0.7 | 2.4  | AT5G22250 | CCR4-associated factor-related protein                           |
| <b>123</b> | 267069_at   | 99   | 1.4 | 4.5  | 8.6 | 133 | 0.8 | 0.9 | 1.9  | AT2G41010 | expressed protein                                                |
| <b>124</b> | 245252_at   | 52   | 1.2 | 4.5  | 8.5 | 61  | 1.0 | 1.5 | 4.1  | AT4G17500 | ethylene responsive element binding factor 1 (frameshift !)      |
| <b>125</b> | 261033_at   | 63   | 1.2 | 6.2  | 8.5 | 19  | 4.2 | 1.3 | 12.6 | AT1G17380 | expressed protein                                                |
| <b>126</b> | 256177_at   | 39   | 2.2 | 4.0  | 8.5 | 71  | 0.8 | 1.1 | 7.0  | AT1G51620 | protein kinase family                                            |
| <b>127</b> | 265670_s_at | 328  | 1.1 | 4.3  | 8.3 | 280 | 0.9 | 1.3 | 7.8  | AT2G32210 | expressed protein                                                |
| <b>128</b> | 253414_at   | 402  | 1.4 | 7.9  | 8.2 | 317 | 0.9 | 1.8 | 11.4 | AT4G33050 | expressed protein                                                |
| <b>129</b> | 256633_at   | 160  | 0.8 | 4.7  | 8.2 | 130 | 1.2 | 0.8 | 5.2  | AT3G28340 | galactinol synthase, putative                                    |
| <b>130</b> | 267623_at   | 214  | 1.3 | 6.7  | 8.1 | 196 | 0.9 | 1.5 | 7.0  | AT2G39650 | expressed protein                                                |
| <b>131</b> | 246018_at   | 234  | 0.9 | 3.1  | 8.0 | 148 | 1.2 | 1.1 | 9.6  | AT5G10695 | expressed protein                                                |
| <b>132</b> | 246584_at   | 177  | 2.8 | 9.5  | 8.0 | 180 | 0.8 | 1.0 | 2.8  | AT5G14730 | expressed protein                                                |
| <b>133</b> | 257751_at   | 127  | 1.1 | 4.6  | 7.9 | 214 | 0.8 | 0.6 | 2.4  | AT3G18690 | expressed protein                                                |
| <b>134</b> | 261367_at   | 79   | 3.2 | 3.9  | 7.9 | 66  | 3.5 | 3.5 | 17.7 | AT1G53080 | protein kinase -related                                          |
| <b>135</b> | 255945_at   | 25   | 1.5 | 3.8  | 7.7 | 27  | 0.7 | 1.1 | 1.6  | AT5G28610 | expressed protein                                                |
| <b>136</b> | 258436_at   | 139  | 1.1 | 6.0  | 7.7 | 177 | 1.2 | 1.2 | 2.8  | AT3G16720 | RING zinc finger protein -related                                |
| <b>137</b> | 255733_at   | 120  | 1.4 | 5.1  | 7.7 | 193 | 0.9 | 0.8 | 4.2  | AT1G25400 | expressed protein                                                |
| <b>138</b> | 260046_at   | 99   | 1.9 | 6.4  | 7.6 | 103 | 0.9 | 1.1 | 8.4  | AT1G73800 | calmodulin-binding protein                                       |
| <b>139</b> | 258653_at   | 29   | 2.4 | 4.4  | 7.6 | 2   | 5.3 | 9.1 | 40.5 | AT3G09870 | auxin-induced (indole-3-acetic acid induced) protein family      |
| <b>140</b> | 267083_at   | 1812 | 2.0 | 6.3  | 7.6 | 777 | 1.1 | 2.2 | 11.4 | AT2G41100 | calmodulin-related protein 3, touch-induced (TCH3)               |
| <b>141</b> | 245119_at   | 109  | 1.0 | 3.8  | 7.6 | 154 | 0.9 | 1.1 | 3.2  | AT2G41640 | expressed protein                                                |

|     |             |      |     |     |     |      |     |     |      |           |                                                                      |
|-----|-------------|------|-----|-----|-----|------|-----|-----|------|-----------|----------------------------------------------------------------------|
| 142 | 247177_at   | 70   | 0.8 | 3.9 | 7.5 | 84   | 1.2 | 0.9 | 6.6  | AT5G65300 | expressed protein                                                    |
| 143 | 257536_at   | 59   | 1.2 | 2.9 | 7.5 | 70   | 0.7 | 1.2 | 3.4  | AT3G02800 | expressed protein                                                    |
| 144 | 267357_at   | 173  | 1.4 | 4.2 | 7.5 | 77   | 1.3 | 2.2 | 5.9  | AT2G40000 | nematode-resistance protein -related                                 |
| 145 | 259507_at   | 119  | 1.7 | 7.5 | 7.4 | 234  | 0.9 | 2.6 | 19.4 | AT1G43910 | AAA-type ATPase family                                               |
| 146 | 267311_at   | 29   | 4.5 | 6.9 | 7.4 | 128  | 0.7 | 0.6 | 0.5  | AT2G34670 | proline-rich protein family                                          |
| 147 | 253061_at   | 115  | 2.2 | 4.7 | 7.3 | 191  | 0.9 | 1.6 | 1.3  | AT4G37610 | expressed protein                                                    |
| 148 | 250796_at   | 55   | 1.1 | 2.5 | 7.3 | 28   | 3.4 | 1.4 | 28.6 | AT5G05300 | hypothetical protein                                                 |
| 149 | 262383_at   | 168  | 1.3 | 5.4 | 7.3 | 270  | 0.9 | 1.1 | 1.9  | AT1G72940 | disease resistance protein (TIR-NBS class), putative                 |
| 150 | 266908_at   | 29   | 4.5 | 5.9 | 7.3 | 11   | 1.8 | 2.0 | 16.2 | AT2G34650 | protein kinase (PINOID/PID)                                          |
| 151 | 252539_at   | 34   | 2.7 | 5.3 | 7.2 | 4    | 0.8 | 9.7 | 84.7 | AT3G45730 | expressed protein                                                    |
| 152 | 261021_at   | 73   | 1.8 | 5.0 | 7.2 | 52   | 1.1 | 3.5 | 36.5 | AT1G26380 | FAD-linked oxidoreductase family                                     |
| 153 | 248230_at   | 59   | 0.8 | 3.2 | 7.2 | 127  | 0.7 | 0.6 | 1.6  | AT5G53830 | expressed protein                                                    |
| 154 | 256356_s_at | 30   | 1.0 | 5.0 | 7.1 | 30   | 6.8 | 5.8 | 26.2 | AT1G66500 | expressed protein                                                    |
| 155 | 254524_at   | 32   | 2.8 | 7.7 | 7.1 | 27   | 2.3 | 1.2 | 7.3  | AT4G20000 | expressed protein                                                    |
| 156 | 266071_at   | 71   | 1.1 | 3.7 | 7.1 | 76   | 1.0 | 3.2 | 40.6 | AT2G18680 | expressed protein                                                    |
| 157 | 254784_at   | 939  | 1.5 | 6.0 | 7.1 | 966  | 0.9 | 1.2 | 6.1  | AT4G12720 | MutT/nudix family protein                                            |
| 158 | 263379_at   | 418  | 1.2 | 7.2 | 7.0 | 436  | 1.2 | 1.3 | 3.6  | AT2G40140 | CCCH-type zinc finger protein -related                               |
| 159 | 264213_at   | 96   | 2.0 | 4.8 | 7.0 | 95   | 0.9 | 0.8 | 2.3  | AT1G65390 | disease resistance protein (TIR class), putative                     |
| 160 | 251884_at   | 40   | 1.7 | 4.0 | 7.0 | 64   | 0.8 | 1.3 | 5.7  | AT3G54150 | embryonic abundant protein -related                                  |
| 161 | 251507_at   | 167  | 1.4 | 4.7 | 6.9 | 135  | 0.9 | 1.0 | 3.0  | AT3G59080 | expressed protein                                                    |
| 162 | 248799_at   | 97   | 1.7 | 5.0 | 6.9 | 115  | 1.1 | 1.2 | 1.6  | AT5G47230 | ethylene responsive element binding factor 5 (AtERF5)                |
| 163 | 258682_at   | 206  | 1.0 | 5.9 | 6.8 | 188  | 1.3 | 2.1 | 6.9  | AT3G08720 | ribosomal-protein S6 kinase (ATPK19) -related                        |
| 164 | 254200_at   | 39   | 0.6 | 2.9 | 6.8 | 46   | 0.9 | 1.0 | 3.0  | AT4G24110 | expressed protein                                                    |
| 165 | 265853_at   | 60   | 1.8 | 4.0 | 6.6 | 37   | 3.7 | 3.5 | 13.7 | AT2G42360 | RING zinc finger protein -related                                    |
| 166 | 254926_at   | 263  | 0.9 | 5.3 | 6.5 | 262  | 0.8 | 1.0 | 5.7  | AT4G11280 | 1-aminocyclopropane-1-carboxylate synthase 6 (ACC synthase 6) (ACS6) |
| 167 | 266832_at   | 89   | 7.2 | 8.8 | 6.5 | 114  | 1.3 | 1.9 | 2.8  | AT2G30040 | protein kinase family                                                |
| 168 | 246289_at   | 1138 | 1.3 | 4.1 | 6.3 | 1079 | 0.9 | 0.9 | 3.0  | AT3G56880 | expressed protein                                                    |
| 169 | 256793_at   | 207  | 1.4 | 3.9 | 6.2 | 265  | 0.9 | 0.9 | 5.6  | AT3G22160 | expressed protein                                                    |
| 170 | 260477_at   | 211  | 1.2 | 4.9 | 6.2 | 223  | 1.0 | 0.9 | 2.2  | AT1G11050 | protein kinase family                                                |
| 171 | 256183_at   | 174  | 1.1 | 4.6 | 6.1 | 192  | 1.0 | 1.0 | 4.9  | AT1G51660 | mitogen-activated protein kinase kinase (MAPKK), putative (MKK4)     |
| 172 | 264363_at   | 27   | 1.4 | 4.9 | 6.1 | 17   | 2.1 | 0.5 | 2.8  | AT1G03170 | expressed protein                                                    |
| 173 | 251054_at   | 182  | 1.8 | 5.6 | 6.1 | 152  | 0.7 | 0.8 | 5.2  | AT5G01540 | receptor lectin kinase, putative                                     |
| 174 | 254060_at   | 23   | 1.6 | 7.0 | 6.0 | 47   | 0.9 | 0.6 | 2.5  | AT4G25350 | hypothetical protein                                                 |
| 175 | 251282_at   | 131  | 3.1 | 6.9 | 6.0 | 70   | 0.9 | 2.4 | 8.0  | AT3G61630 | AP2 domain transcription factor, putative                            |
| 176 | 245329_at   | 394  | 2.0 | 5.6 | 6.0 | 375  | 0.9 | 1.3 | 11.6 | AT4G14365 | expressed protein                                                    |
| 177 | 267451_at   | 103  | 1.5 | 4.6 | 6.0 | 95   | 1.1 | 1.1 | 3.1  | AT2G33710 | AP2 domain transcription factor family                               |

|            |             |      |     |     |     |      |     |     |      |           |                                                            |
|------------|-------------|------|-----|-----|-----|------|-----|-----|------|-----------|------------------------------------------------------------|
| <b>178</b> | 250676_at   | 1505 | 1.2 | 4.1 | 5.9 | 1541 | 1.0 | 0.9 | 3.6  | AT5G06320 | harpin-induced protein 1 family (NDR1/HIN1-like protein 3) |
| <b>179</b> | 265184_at   | 107  | 1.6 | 4.6 | 5.9 | 98   | 1.1 | 1.2 | 4.6  | AT1G23710 | expressed protein                                          |
| <b>180</b> | 253859_at   | 75   | 3.0 | 4.4 | 5.9 | 87   | 1.9 | 1.3 | 2.2  | AT4G27657 | expressed protein                                          |
| <b>181</b> | 245866_s_at | 429  | 1.7 | 4.3 | 5.9 | 194  | 1.1 | 0.9 | 4.7  | AT1G57990 | purine permease-related                                    |
| <b>182</b> | 265632_at   | 56   | 1.3 | 0.9 | 5.9 | 44   | 0.9 | 0.4 | 6.0  | AT2G14290 | F-box protein family                                       |
| <b>183</b> | 247125_at   | 457  | 1.3 | 3.8 | 5.9 | 408  | 1.0 | 0.8 | 2.9  | AT5G66070 | C3HC4-type zinc finger protein family                      |
| <b>184</b> | 256376_s_at | 59   | 2.2 | 5.3 | 5.9 | 62   | 0.8 | 0.9 | 8.5  | AT1G66690 | methyltransferase-related                                  |
| <b>185</b> | 248606_at   | 175  | 1.5 | 3.0 | 5.8 | 161  | 1.2 | 1.2 | 1.6  | AT5G49450 | bZIP family transcription factor                           |
| <b>186</b> | 246270_at   | 909  | 0.9 | 3.9 | 5.8 | 1082 | 1.0 | 0.9 | 2.5  | AT4G36500 | expressed protein                                          |
| <b>187</b> | 260656_at   | 527  | 1.7 | 3.6 | 5.8 | 465  | 0.8 | 0.9 | 2.2  | AT1G19380 | expressed protein                                          |
| <b>188</b> | 248160_at   | 70   | 7.5 | 5.8 | 5.7 | 7    | 1.2 | 0.8 | 7.1  | AT5G54470 | CONSTANS B-box zinc finger family protein                  |
| <b>189</b> | 265327_at   | 158  | 0.7 | 2.0 | 5.7 | 167  | 1.4 | 1.0 | 0.7  | AT2G18210 | expressed protein                                          |
| <b>190</b> | 249747_at   | 49   | 1.9 | 5.1 | 5.7 | 77   | 0.7 | 0.9 | 1.4  | AT5G24600 | expressed protein                                          |
| <b>191</b> | 246099_at   | 840  | 1.6 | 4.3 | 5.7 | 288  | 0.9 | 3.3 | 12.2 | AT5G20230 | plastocyanin-like domain containing protein                |
| <b>192</b> | 249918_at   | 1476 | 2.1 | 4.0 | 5.7 | 890  | 1.0 | 2.0 | 6.6  | AT5G19240 | expressed protein                                          |
| <b>193</b> | 264460_at   | 329  | 2.5 | 8.9 | 5.5 | 352  | 0.9 | 1.7 | 6.3  | AT1G10170 | expressed protein                                          |
| <b>194</b> | 247279_at   | 920  | 1.4 | 3.4 | 5.4 | 1038 | 0.8 | 0.6 | 2.2  | AT5G64310 | arabinogalactan-protein (AGP1)                             |
| <b>195</b> | 254241_at   | 70   | 2.2 | 5.8 | 5.4 | 85   | 1.2 | 0.8 | 5.5  | AT4G23190 | serine/threonine kinase - like protein                     |
| <b>196</b> | 249188_at   | 105  | 1.6 | 4.3 | 5.4 | 143  | 0.8 | 0.6 | 6.7  | AT5G42830 | hydroxycinnamoyl benzoyltransferase-related                |
| <b>197</b> | 252136_at   | 53   | 1.6 | 4.0 | 5.4 | 87   | 1.0 | 4.7 | 29.3 | AT3G50770 | calmodulin-related protein, putative                       |
| <b>198</b> | 262986_at   | 470  | 1.3 | 2.7 | 5.4 | 333  | 1.3 | 2.7 | 3.0  | AT1G23390 | Kelch repeat containing F-box protein family               |
| <b>199</b> | 247925_at   | 1283 | 1.2 | 4.5 | 5.3 | 725  | 0.9 | 1.1 | 2.7  | AT5G57560 | xyloglucan endotransglycosylase (TCH4)                     |
| <b>200</b> | 254408_at   | 74   | 1.3 | 5.2 | 5.3 | 110  | 1.3 | 0.8 | 3.4  | AT4G21390 | serine/threonine kinase - like protein                     |
| <b>201</b> | 261065_at   | 95   | 4.1 | 4.2 | 5.3 | 47   | 2.7 | 7.0 | 22.9 | AT1G07500 | hypothetical protein                                       |
| <b>202</b> | 247071_at   | 64   | 1.1 | 3.1 | 5.2 | 27   | 1.4 | 1.4 | 17.3 | AT5G66640 | expressed protein                                          |
| <b>203</b> | 261474_at   | 75   | 2.6 | 3.8 | 5.2 | 73   | 0.7 | 0.7 | 6.0  | AT1G14540 | anionic peroxidase, putative                               |
| <b>204</b> | 256017_at   | 474  | 1.4 | 4.5 | 5.2 | 248  | 0.9 | 1.3 | 8.0  | AT1G19180 | expressed protein                                          |
| <b>205</b> | 245306_at   | 2489 | 7.8 | 7.8 | 5.2 | 444  | 1.5 | 3.8 | 5.4  | AT4G14690 | expressed protein                                          |
| <b>206</b> | 254229_at   | 45   | 0.7 | 2.4 | 5.1 | 50   | 1.0 | 0.9 | 2.9  | AT4G23610 | expressed protein                                          |
| <b>207</b> | 253284_at   | 1101 | 1.5 | 4.4 | 5.1 | 907  | 1.1 | 1.2 | 2.9  | AT4G34150 | C2 domain-containing protein                               |
| <b>208</b> | 262671_at   | 46   | 1.5 | 3.1 | 5.1 | 49   | 1.5 | 1.4 | 7.9  | AT1G76040 | calcium-dependent protein kinase, putative (CDPK)          |
| <b>209</b> | 257644_at   | 115  | 1.2 | 2.7 | 5.1 | 205  | 0.9 | 0.7 | 2.8  | AT3G25780 | allene oxide cyclase family                                |
| <b>210</b> | 259428_at   | 98   | 1.2 | 2.6 | 5.1 | 93   | 0.7 | 0.9 | 11.7 | AT1G01560 | mitogen-activated protein kinase (MAPK), putative (MPK11)  |
| <b>211</b> | 265075_at   | 867  | 2.0 | 4.8 | 5.1 | 813  | 1.2 | 1.1 | 4.5  | AT1G55450 | expressed protein                                          |
| <b>212</b> | 263584_at   | 115  | 1.0 | 4.5 | 5.0 | 125  | 1.0 | 0.9 | 3.6  | AT2G17040 | No apical meristem (NAM) protein family                    |
| <b>213</b> | 249495_at   | 33   | 1.4 | 7.0 | 5.0 | 59   | 1.4 | 1.5 | 3.0  | AT5G39100 | germin-like protein                                        |
| <b>214</b> | 259033_at   | 146  | 1.3 | 3.1 | 5.0 | 147  | 1.1 | 1.5 | 14.0 | AT3G09410 | pectinacetyltransferase family                             |

|            |           |      |     |     |     |      |     |     |      |           |                                                                                                                                                   |
|------------|-----------|------|-----|-----|-----|------|-----|-----|------|-----------|---------------------------------------------------------------------------------------------------------------------------------------------------|
| <b>215</b> | 260405_at | 36   | 1.2 | 3.3 | 5.0 | 59   | 0.3 | 1.2 | 4.5  | AT1G69930 | glutathione transferase, putative                                                                                                                 |
| <b>216</b> | 245662_at | 94   | 0.7 | 4.3 | 5.0 | 90   | 1.2 | 2.0 | 6.5  | AT1G28190 | expressed protein                                                                                                                                 |
| <b>217</b> | 250435_at | 464  | 1.0 | 4.0 | 5.0 | 330  | 1.0 | 1.7 | 6.9  | AT5G10380 | C3HC4-type zinc finger protein family                                                                                                             |
| <b>218</b> | 253485_at | 231  | 1.3 | 6.4 | 5.0 | 208  | 0.8 | 1.2 | 7.7  | AT4G31800 | WRKY family transcription factor                                                                                                                  |
| <b>219</b> | 265132_at | 105  | 0.7 | 3.3 | 4.9 | 123  | 0.9 | 1.0 | 2.7  | AT1G23830 | expressed protein                                                                                                                                 |
| <b>220</b> | 257053_at | 238  | 1.1 | 2.9 | 4.9 | 301  | 1.6 | 1.2 | 2.7  | AT3G15210 | ethylene responsive element binding factor 4 (ERF4)                                                                                               |
| <b>221</b> | 250493_at | 54   | 1.5 | 2.7 | 4.9 | 117  | 0.7 | 0.7 | 2.2  | AT5G09800 | hypothetical protein                                                                                                                              |
| <b>222</b> | 266072_at | 350  | 1.5 | 3.1 | 4.9 | 142  | 1.1 | 1.3 | 8.4  | AT2G18700 | glycosyltransferase family 20                                                                                                                     |
| <b>223</b> | 261143_at | 895  | 1.1 | 2.8 | 4.8 | 931  | 1.1 | 1.0 | 1.8  | AT1G19770 | purine permease-related                                                                                                                           |
| <b>224</b> | 256891_at | 676  | 1.3 | 3.0 | 4.8 | 1950 | 1.0 | 1.0 | 0.8  | AT3G19030 | expressed protein                                                                                                                                 |
| <b>225</b> | 249558_at | 58   | 1.0 | 3.0 | 4.8 | 84   | 1.2 | 0.9 | 1.9  | AT5G38310 | hypothetical protein                                                                                                                              |
| <b>226</b> | 250007_at | 79   | 4.7 | 4.3 | 4.8 | 57   | 3.2 | 2.7 | 2.6  | AT5G18670 | glycosyl hydrolase family 14 (beta-amylase)                                                                                                       |
| <b>227</b> | 259211_at | 57   | 1.1 | 3.6 | 4.8 | 24   | 2.5 | 2.1 | 16.9 | AT3G09020 | glycosyltransferase-related                                                                                                                       |
| <b>228</b> | 258786_at | 535  | 1.4 | 4.0 | 4.8 | 474  | 0.9 | 1.0 | 5.3  | AT3G11820 | syntaxin of plants SYP121                                                                                                                         |
| <b>229</b> | 245038_at | 315  | 1.1 | 3.0 | 4.7 | 183  | 0.8 | 1.0 | 8.3  | AT2G26560 | patatin, putative                                                                                                                                 |
| <b>230</b> | 254231_at | 177  | 1.0 | 3.3 | 4.7 | 203  | 0.8 | 0.8 | 1.9  | AT4G23810 | WRKY family transcription factor                                                                                                                  |
| <b>231</b> | 251640_at | 922  | 1.0 | 2.9 | 4.7 | 888  | 0.9 | 0.9 | 1.8  | AT3G57450 | expressed protein                                                                                                                                 |
| <b>232</b> | 259312_at | 383  | 1.1 | 3.4 | 4.7 | 427  | 1.1 | 1.4 | 4.3  | AT3G05200 | RING-H2 zinc finger protein ATL6 -related                                                                                                         |
| <b>233</b> | 259626_at | 605  | 1.6 | 4.7 | 4.7 | 520  | 0.9 | 1.0 | 5.1  | AT1G42990 | bZIP family transcription factor                                                                                                                  |
| <b>234</b> | 264339_at | 131  | 1.2 | 2.1 | 4.7 | 59   | 1.2 | 2.2 | 4.1  | AT1G70290 | alpha,alpha-trehalose-phosphate synthase, UDP-forming (trehalose-6-phosphate synthase/UDP-glucose-glucosephosphate glucosyltransferase), putative |
| <b>235</b> | 261192_at | 278  | 4.2 | 7.7 | 4.7 | 210  | 1.0 | 2.2 | 10.2 | AT1G32870 | NAM protein -related                                                                                                                              |
| <b>236</b> | 248870_at | 251  | 1.3 | 6.2 | 4.6 | 285  | 1.1 | 1.6 | 3.6  | AT5G46710 | expressed protein                                                                                                                                 |
| <b>237</b> | 261526_at | 179  | 1.3 | 3.8 | 4.6 | 195  | 1.0 | 1.0 | 3.7  | AT1G14370 | protein kinase (APK2a)                                                                                                                            |
| <b>238</b> | 260411_at | 227  | 1.2 | 3.0 | 4.6 | 238  | 1.0 | 1.0 | 1.7  | AT1G69890 | expressed protein                                                                                                                                 |
| <b>239</b> | 245840_at | 54   | 1.2 | 2.3 | 4.6 | 65   | 0.8 | 1.1 | 4.3  | AT1G58420 | expressed protein                                                                                                                                 |
| <b>240</b> | 254592_at | 217  | 1.2 | 3.7 | 4.6 | 200  | 1.1 | 1.5 | 6.4  | AT4G18880 | heat shock transcription factor 21                                                                                                                |
| <b>241</b> | 248347_at | 275  | 6.5 | 9.3 | 4.6 | 118  | 1.0 | 1.4 | 2.5  | AT5G52250 | transducin / WD-40 repeat protein family                                                                                                          |
| <b>242</b> | 253999_at | 55   | 1.7 | 4.1 | 4.5 | 115  | 1.0 | 0.9 | 2.0  | AT4G26200 | 1-aminocyclopropane-1-carboxylate synthase (ACC synthase), putative                                                                               |
| <b>243</b> | 252592_at | 1137 | 0.9 | 3.7 | 4.5 | 877  | 1.0 | 0.9 | 1.6  | AT3G45640 | mitogen-activated protein kinase (MAPK), putative (MPK3)                                                                                          |
| <b>244</b> | 245711_at | 217  | 1.3 | 3.4 | 4.5 | 145  | 1.3 | 1.6 | 4.2  | AT5G04340 | c2h2 zinc finger transcription factor -related                                                                                                    |
| <b>245</b> | 252009_at | 1208 | 1.4 | 3.3 | 4.5 | 882  | 1.1 | 1.2 | 2.8  | AT3G52800 | zinc finger - like protein                                                                                                                        |
| <b>246</b> | 267246_at | 341  | 2.0 | 4.6 | 4.5 | 253  | 1.2 | 1.7 | 8.3  | AT2G30250 | WRKY family transcription factor                                                                                                                  |
| <b>247</b> | 253830_at | 196  | 1.5 | 3.0 | 4.5 | 184  | 1.1 | 0.9 | 2.4  | AT4G27652 | expressed protein                                                                                                                                 |
| <b>248</b> | 248868_at | 500  | 1.0 | 2.6 | 4.5 | 475  | 1.0 | 1.0 | 2.2  | AT5G46780 | proline-rich protein family                                                                                                                       |
| <b>249</b> | 265197_at | 125  | 6.1 | 7.9 | 4.5 | 113  | 1.3 | 2.5 | 3.7  | AT2G36750 | UDP-glycosyltransferase family                                                                                                                    |

|            |             |      |     |     |     |      |     |     |      |           |                                                             |
|------------|-------------|------|-----|-----|-----|------|-----|-----|------|-----------|-------------------------------------------------------------|
| <b>250</b> | 255504_at   | 586  | 1.2 | 4.0 | 4.5 | 334  | 1.0 | 1.4 | 3.9  | AT4G02200 | drought-induced protein -related                            |
| <b>251</b> | 247047_at   | 143  | 0.8 | 2.7 | 4.5 | 94   | 1.1 | 1.1 | 3.2  | AT5G66650 | expressed protein                                           |
| <b>252</b> | 245381_at   | 38   | 1.9 | 4.4 | 4.4 | 51   | 1.5 | 1.0 | 2.8  | AT4G17785 | MYB transcription factor like protein                       |
| <b>253</b> | 248726_at   | 106  | 1.1 | 2.6 | 4.4 | 76   | 1.4 | 0.9 | 2.0  | AT5G47960 | Ras family GTP-binding protein                              |
| <b>254</b> | 264232_at   | 315  | 1.0 | 3.4 | 4.4 | 372  | 1.1 | 0.9 | 2.3  | AT1G67470 | protein kinase family                                       |
| <b>255</b> | 261476_at   | 78   | 1.4 | 3.1 | 4.4 | 65   | 1.6 | 1.6 | 1.9  | AT1G14480 | expressed protein                                           |
| <b>256</b> | 247708_at   | 363  | 0.9 | 2.5 | 4.4 | 431  | 1.0 | 0.8 | 1.8  | AT5G59550 | expressed protein                                           |
| <b>257</b> | 252977_at   | 42   | 2.6 | 3.1 | 4.4 | 19   | 2.6 | 2.0 | 20.9 | AT4G38560 | Phospholipase like protein                                  |
| <b>258</b> | 247878_at   | 62   | 1.7 | 2.7 | 4.4 | 55   | 0.8 | 0.8 | 1.0  | AT5G57760 | hypothetical protein                                        |
| <b>259</b> | 264434_at   | 90   | 1.9 | 3.3 | 4.3 | 69   | 1.1 | 0.7 | 8.9  | AT1G10340 | ankyrin repeat protein family                               |
| <b>260</b> | 249983_at   | 429  | 1.9 | 4.0 | 4.3 | 297  | 0.9 | 2.1 | 8.5  | AT5G18470 | expressed protein                                           |
| <b>261</b> | 260287_at   | 320  | 1.4 | 2.5 | 4.3 | 114  | 1.8 | 3.8 | 8.3  | AT1G80440 | Kelch repeat containing F-box protein family                |
| <b>262</b> | 264636_at   | 777  | 1.6 | 3.0 | 4.3 | 1049 | 0.8 | 0.8 | 1.2  | AT1G65490 | expressed protein                                           |
| <b>263</b> | 247707_at   | 182  | 1.4 | 5.0 | 4.3 | 153  | 1.2 | 1.2 | 5.4  | AT5G59450 | scarecrow-like transcription factor 11 (SCL11)              |
| <b>264</b> | 247509_at   | 184  | 1.4 | 2.6 | 4.3 | 210  | 1.0 | 1.0 | 1.9  | AT5G62020 | heat shock transcription factor 6 (HSF6)                    |
| <b>265</b> | 254922_at   | 73   | 1.2 | 2.7 | 4.3 | 115  | 1.1 | 0.8 | 3.7  | AT4G11370 | RING-H2 finger protein, putative                            |
| <b>266</b> | 257083_s_at | 111  | 1.7 | 2.6 | 4.2 | 188  | 1.3 | 0.7 | 1.5  | AT3G20590 | non-race specific disease resistance protein -related       |
| <b>267</b> | 257022_at   | 159  | 1.5 | 4.0 | 4.2 | 174  | 0.8 | 0.8 | 3.7  | AT3G19580 | zinc finger protein -related                                |
| <b>268</b> | 261063_at   | 103  | 1.3 | 3.2 | 4.2 | 107  | 1.4 | 1.6 | 6.3  | AT1G07520 | scarecrow transcription factor family                       |
| <b>269</b> | 260401_at   | 708  | 1.4 | 4.2 | 4.2 | 419  | 1.2 | 1.6 | 5.9  | AT1G69840 | expressed protein                                           |
| <b>270</b> | 251176_at   | 80   | 1.3 | 4.2 | 4.2 | 106  | 1.0 | 2.9 | 32.6 | AT3G63380 | calcium-transporting ATPase (calcium pump), putative        |
| <b>271</b> | 258787_at   | 127  | 1.4 | 3.3 | 4.2 | 117  | 0.9 | 0.9 | 2.3  | AT3G11840 | expressed protein                                           |
| <b>272</b> | 261450_s_at | 540  | 1.4 | 3.3 | 4.2 | 393  | 1.2 | 0.9 | 1.1  | AT1G21110 | O-methyltransferase 1, putative                             |
| <b>273</b> | 262211_at   | 44   | 0.9 | 3.5 | 4.2 | 30   | 1.8 | 2.8 | 3.3  | AT1G74930 | AP2 domain transcription factor, putative                   |
| <b>274</b> | 249862_at   | 478  | 1.2 | 2.3 | 4.2 | 495  | 1.2 | 1.6 | 1.6  | AT5G22920 | PGPD14 protein                                              |
| <b>275</b> | 256098_at   | 36   | 2.3 | 2.3 | 4.1 | 30   | 1.1 | 0.5 | 0.6  | AT1G13700 | hypothetical protein                                        |
| <b>276</b> | 262092_at   | 63   | 1.9 | 3.3 | 4.1 | 130  | 1.2 | 1.3 | 1.5  | AT1G56150 | auxin-induced (indole-3-acetic acid induced) protein family |
| <b>277</b> | 256185_at   | 375  | 1.1 | 2.8 | 4.1 | 492  | 1.0 | 0.7 | 1.5  | AT1G51700 | Dof zinc finger protein                                     |
| <b>278</b> | 256046_at   | 163  | 1.4 | 3.7 | 4.1 | 116  | 1.0 | 0.8 | 2.1  | AT1G07135 | glycine-rich protein                                        |
| <b>279</b> | 258262_at   | 162  | 1.2 | 2.8 | 4.1 | 101  | 1.2 | 1.4 | 3.8  | AT3G15770 | expressed protein                                           |
| <b>280</b> | 260275_at   | 54   | 1.4 | 2.8 | 4.1 | 23   | 3.4 | 2.4 | 4.9  | AT1G80610 | expressed protein                                           |
| <b>281</b> | 262374_s_at | 686  | 1.6 | 3.2 | 4.0 | 846  | 1.1 | 1.2 | 2.1  | AT1G72930 | disease resistance protein (TIR class), putative            |
| <b>282</b> | 267293_at   | 1283 | 1.1 | 3.7 | 4.0 | 1329 | 1.1 | 1.1 | 2.7  | AT2G23810 | senescence-associated protein family                        |
| <b>283</b> | 250910_at   | 258  | 1.6 | 5.7 | 4.0 | 218  | 1.0 | 1.2 | 4.7  | AT5G03720 | heat shock transcription factor family                      |
| <b>284</b> | 250289_at   | 1688 | 1.5 | 3.1 | 4.0 | 1299 | 1.0 | 1.2 | 4.4  | AT5G13190 | expressed protein                                           |
| <b>285</b> | 260070_at   | 111  | 1.3 | 2.5 | 4.0 | 96   | 0.9 | 1.3 | 1.1  | AT1G73830 | bHLH protein family                                         |
| <b>286</b> | 258402_at   | 772  | 1.1 | 1.7 | 4.0 | 299  | 1.3 | 1.4 | 1.6  | AT3G15450 | expressed protein                                           |



|            |             |      |     |     |     |      |     |     |      |           |                                                                                |
|------------|-------------|------|-----|-----|-----|------|-----|-----|------|-----------|--------------------------------------------------------------------------------|
| <b>287</b> | 253819_at   | 36   | 0.9 | 2.9 | 3.9 | 65   | 0.8 | 0.4 | 1.9  | AT4G28350 | receptor protein kinase like protein                                           |
| <b>288</b> | 260243_at   | 199  | 1.4 | 2.7 | 3.9 | 194  | 0.9 | 1.1 | 5.9  | AT1G63720 | expressed protein                                                              |
| <b>289</b> | 260856_at   | 210  | 1.5 | 3.3 | 3.9 | 202  | 0.9 | 1.0 | 1.0  | AT1G21910 | transcription factor TINY family                                               |
| <b>290</b> | 245392_at   | 136  | 2.1 | 3.0 | 3.9 | 216  | 0.8 | 0.9 | 0.6  | AT4G15680 | glutaredoxin protein family                                                    |
| <b>291</b> | 251039_at   | 95   | 1.1 | 2.3 | 3.8 | 87   | 1.0 | 1.1 | 4.0  | AT5G02020 | expressed protein                                                              |
| <b>292</b> | 264655_at   | 2051 | 1.7 | 3.1 | 3.8 | 1567 | 1.1 | 1.2 | 3.4  | AT1G09070 | C2 domain-containing protein                                                   |
| <b>293</b> | 256914_at   | 104  | 0.8 | 1.8 | 3.8 | 383  | 1.1 | 0.8 | 0.5  | AT3G23880 | F-box protein family                                                           |
| <b>294</b> | 266656_at   | 135  | 1.1 | 1.7 | 3.8 | 98   | 1.2 | 1.2 | 1.5  | AT2G25900 | CCCH-type zinc finger protein -related                                         |
| <b>295</b> | 246108_at   | 284  | 2.0 | 3.6 | 3.8 | 239  | 1.0 | 0.8 | 1.6  | AT5G28630 | glycine-rich protein                                                           |
| <b>296</b> | 255599_at   | 110  | 0.9 | 2.7 | 3.8 | 85   | 1.1 | 1.5 | 5.0  | AT4G01010 | cyclic nucleotide-regulated ion channel, putative (CNGC13)                     |
| <b>297</b> | 252278_at   | 302  | 1.1 | 3.3 | 3.7 | 249  | 1.2 | 1.3 | 4.4  | AT3G49530 | No apical meristem (NAM) protein family                                        |
| <b>298</b> | 251096_at   | 112  | 1.3 | 3.9 | 3.7 | 64   | 1.5 | 1.3 | 6.3  | AT5G01550 | receptor lectin kinase, putative                                               |
| <b>299</b> | 263919_at   | 54   | 2.3 | 3.6 | 3.7 | 88   | 0.8 | 0.8 | 0.9  | AT2G36470 | expressed protein                                                              |
| <b>300</b> | 263948_at   | 96   | 1.0 | 2.8 | 3.7 | 54   | 1.9 | 1.8 | 9.1  | AT2G35980 | harpin-induced protein 1 family (HIN1)                                         |
| <b>301</b> | 252214_at   | 179  | 1.4 | 2.6 | 3.7 | 154  | 0.9 | 1.4 | 7.2  | AT3G50260 | AP2 domain transcription factor, putative                                      |
| <b>302</b> | 258275_at   | 127  | 1.0 | 3.0 | 3.7 | 116  | 0.8 | 0.7 | 1.9  | AT3G15760 | expressed protein                                                              |
| <b>303</b> | 256366_at   | 238  | 1.2 | 3.3 | 3.7 | 245  | 1.0 | 1.1 | 9.2  | AT1G66880 | serine/threonine protein kinase family                                         |
| <b>304</b> | 256426_at   | 60   | 1.6 | 4.6 | 3.7 | 91   | 1.0 | 1.5 | 5.9  | AT1G33420 | expressed protein                                                              |
| <b>305</b> | 249139_at   | 308  | 1.2 | 2.7 | 3.7 | 298  | 1.1 | 1.1 | 1.9  | AT5G43170 | Cys2/His2-type zinc finger protein 3 (dbj BAA85109.1)                          |
| <b>306</b> | 266545_at   | 101  | 1.9 | 3.3 | 3.6 | 68   | 1.2 | 0.9 | 2.0  | AT2G35290 | expressed protein                                                              |
| <b>307</b> | 266316_at   | 134  | 0.6 | 1.8 | 3.6 | 104  | 1.0 | 1.0 | 1.7  | AT2G27080 | expressed protein                                                              |
| <b>308</b> | 248959_at   | 49   | 1.2 | 2.5 | 3.6 | 16   | 3.5 | 3.5 | 9.7  | AT5G45630 | hypothetical protein                                                           |
| <b>309</b> | 263403_at   | 195  | 1.3 | 3.3 | 3.6 | 92   | 1.1 | 2.6 | 19.7 | AT2G04040 | MATE efflux protein family                                                     |
| <b>310</b> | 252334_at   | 52   | 1.2 | 3.8 | 3.6 | 75   | 1.1 | 4.0 | 30.1 | AT3G48850 | mitochondrial phosphate transporter, putative                                  |
| <b>311</b> | 261901_at   | 699  | 1.5 | 1.9 | 3.6 | 566  | 1.2 | 1.4 | 1.8  | AT1G80920 | DnaJ protein family                                                            |
| <b>312</b> | 260015_at   | 47   | 2.0 | 3.2 | 3.6 | 55   | 1.1 | 0.9 | 4.6  | AT1G67980 | caffeoyl-CoA 3-O-methyltransferase, putative                                   |
| <b>313</b> | 259992_at   | 339  | 1.1 | 4.2 | 3.6 | 253  | 1.0 | 1.2 | 5.5  | AT1G67970 | heat shock transcription factor 5 (HSF5)                                       |
| <b>314</b> | 266799_at   | 145  | 1.3 | 2.4 | 3.6 | 107  | 0.6 | 0.7 | 1.6  | AT2G22860 | (AtPSK) phyto sulfokine precursor 2                                            |
| <b>315</b> | 253305_at   | 591  | 2.5 | 3.9 | 3.6 | 937  | 1.3 | 1.7 | 2.6  | AT4G33666 | expressed protein                                                              |
| <b>316</b> | 248981_at   | 155  | 1.2 | 4.4 | 3.6 | 157  | 1.2 | 1.7 | 4.5  | AT5G45110 | regulatory protein NPR1-related; transcription factor inhibitor I kappa B-like |
| <b>317</b> | 245696_at   | 29   | 2.3 | 0.9 | 3.6 | 7    | 4.4 | 2.7 | 9.4  | AT5G04190 | phytochrome kinase substrate 1 - like protein                                  |
| <b>318</b> | 252053_at   | 405  | 1.1 | 3.1 | 3.6 | 315  | 1.0 | 0.9 | 2.9  | AT3G52400 | syntaxin of plants SYP122                                                      |
| <b>319</b> | 266396_at   | 253  | 0.9 | 1.7 | 3.6 | 209  | 1.0 | 1.0 | 4.3  | AT2G38790 | expressed protein                                                              |
| <b>320</b> | 253292_at   | 198  | 1.0 | 2.0 | 3.6 | 234  | 1.0 | 1.0 | 2.0  | AT4G33985 | expressed protein                                                              |
| <b>321</b> | 265460_at   | 2742 | 0.8 | 3.6 | 3.5 | 2570 | 1.1 | 1.6 | 3.3  | AT2G46600 | calcium-binding protein, putative                                              |
| <b>322</b> | 249264_s_at | 94   | 2.0 | 5.6 | 3.5 | 52   | 0.9 | 1.1 | 3.3  | AT5G41740 | disease resistance protein (TIR-NBS-LRR class), putative                       |
| <b>323</b> | 250323_at   | 255  | 1.1 | 2.4 | 3.5 | 294  | 0.9 | 0.9 | 1.0  | AT5G12880 | proline-rich protein family                                                    |

|            |             |      |     |     |     |      |     |     |      |           |                                                               |
|------------|-------------|------|-----|-----|-----|------|-----|-----|------|-----------|---------------------------------------------------------------|
| <b>324</b> | 260648_at   | 74   | 1.8 | 3.0 | 3.5 | 85   | 0.9 | 1.8 | 15.3 | AT1G08050 | C3HC4-type zinc finger protein family                         |
| <b>325</b> | 250575_at   | 218  | 1.2 | 2.7 | 3.5 | 188  | 1.0 | 0.9 | 3.4  | AT5G08240 | expressed protein                                             |
| <b>326</b> | 251281_at   | 146  | 0.9 | 2.9 | 3.5 | 131  | 1.1 | 0.8 | 2.0  | AT3G61640 | arabinogalactan-protein (AGP20)                               |
| <b>327</b> | 249583_at   | 393  | 1.0 | 2.5 | 3.5 | 314  | 0.9 | 0.8 | 1.5  | AT5G37770 | calmodulin-related protein 2, touch-induced (TCH2)            |
| <b>328</b> | 263931_at   | 237  | 1.2 | 2.2 | 3.5 | 110  | 1.2 | 1.1 | 3.0  | AT2G36220 | expressed protein                                             |
| <b>329</b> | 260211_at   | 198  | 1.5 | 2.4 | 3.5 | 158  | 1.0 | 1.2 | 3.3  | AT1G74440 | expressed protein                                             |
| <b>330</b> | 248686_at   | 991  | 1.6 | 3.0 | 3.4 | 253  | 1.1 | 2.8 | 9.3  | AT5G48540 | 33 kDa secretory protein-related                              |
| <b>331</b> | 247351_at   | 1258 | 2.0 | 3.6 | 3.4 | 1139 | 1.1 | 1.4 | 2.2  | AT5G63790 | No apical meristem (NAM) protein family                       |
| <b>332</b> | 248623_at   | 47   | 1.0 | 1.5 | 3.4 | 63   | 0.6 | 0.3 | 0.6  | AT5G49170 | expressed protein                                             |
| <b>333</b> | 265680_at   | 466  | 0.7 | 1.5 | 3.4 | 305  | 1.3 | 1.0 | 2.6  | AT2G32150 | haloacid dehalogenase-like hydrolase family                   |
| <b>334</b> | 259937_s_at | 420  | 1.1 | 3.4 | 3.4 | 332  | 1.1 | 2.6 | 7.3  | AT1G71330 | ABC transporter family protein                                |
| <b>335</b> | 245272_at   | 73   | 1.2 | 3.8 | 3.4 | 60   | 1.0 | 0.9 | 2.6  | AT4G17250 | expressed protein                                             |
| <b>336</b> | 252533_at   | 60   | 1.4 | 2.3 | 3.4 | 97   | 0.8 | 0.6 | 1.0  | AT3G46110 | expressed protein                                             |
| <b>337</b> | 249493_at   | 253  | 1.8 | 3.3 | 3.4 | 256  | 1.1 | 1.1 | 1.0  | AT5G39080 | transferase family                                            |
| <b>338</b> | 252928_at   | 123  | 1.5 | 2.5 | 3.4 | 118  | 0.9 | 1.0 | 5.2  | AT4G38940 | Kelch repeat containing F-box protein family                  |
| <b>339</b> | 257540_at   | 66   | 2.6 | 2.0 | 3.4 | 73   | 0.5 | 0.9 | 0.9  | AT3G21520 | expressed protein                                             |
| <b>340</b> | 259792_at   | 301  | 1.4 | 3.2 | 3.4 | 208  | 1.0 | 1.0 | 4.0  | AT1G29690 | expressed protein                                             |
| <b>341</b> | 250449_at   | 187  | 1.8 | 2.9 | 3.4 | 214  | 1.1 | 0.6 | 1.0  | AT5G10830 | embryonic abundant protein -related                           |
| <b>342</b> | 253628_at   | 1020 | 1.8 | 3.1 | 3.4 | 561  | 1.3 | 0.6 | 3.2  | AT4G30280 | xyloglucan endotransglycosylase, putative                     |
| <b>343</b> | 260225_at   | 79   | 4.9 | 3.2 | 3.4 | 84   | 0.8 | 1.0 | 7.9  | AT1G74590 | glutathione transferase, putative                             |
| <b>344</b> | 253679_at   | 136  | 1.1 | 2.7 | 3.4 | 135  | 0.8 | 0.9 | 1.4  | AT4G29610 | cytidine deaminase 6 (CDA6)                                   |
| <b>345</b> | 261748_at   | 261  | 1.0 | 2.5 | 3.4 | 166  | 1.2 | 1.0 | 4.8  | AT1G76070 | expressed protein                                             |
| <b>346</b> | 248795_at   | 500  | 1.2 | 2.0 | 3.4 | 629  | 1.0 | 1.2 | 1.4  | AT5G47390 | Myb-related transcription activator-like                      |
| <b>347</b> | 251259_at   | 382  | 2.4 | 4.9 | 3.4 | 296  | 1.1 | 1.4 | 5.8  | AT3G62260 | protein phosphatase 2C (PP2C), putative                       |
| <b>348</b> | 260527_at   | 253  | 1.3 | 2.3 | 3.3 | 93   | 1.1 | 0.7 | 1.1  | AT2G47270 | expressed protein                                             |
| <b>349</b> | 259364_at   | 108  | 1.6 | 2.4 | 3.3 | 97   | 1.1 | 1.4 | 2.4  | AT1G13260 | AP2 domain transcription factor, putative (RAV1)              |
| <b>350</b> | 246253_at   | 185  | 1.2 | 2.9 | 3.3 | 283  | 0.9 | 1.1 | 1.6  | AT4G37260 | myb DNA-binding protein (AtMYB73)                             |
| <b>351</b> | 247693_at   | 286  | 1.3 | 2.5 | 3.3 | 253  | 1.1 | 1.0 | 2.0  | AT5G59730 | exocyst subunit EXO70 family                                  |
| <b>352</b> | 267288_at   | 188  | 1.6 | 2.6 | 3.3 | 151  | 0.9 | 1.2 | 4.4  | AT2G23680 | cold acclimation protein WCOR413 (Triticum aestivum) -related |
| <b>353</b> | 248845_at   | 214  | 1.4 | 3.4 | 3.3 | 168  | 1.4 | 1.4 | 3.3  | AT5G46480 | disease resistance protein (TIR class), putative              |
| <b>354</b> | 265737_at   | 475  | 1.0 | 2.1 | 3.3 | 587  | 0.8 | 0.7 | 1.4  | AT2G01180 | phosphatidic acid phosphatase (PAP2) family                   |
| <b>355</b> | 245777_at   | 101  | 1.1 | 1.9 | 3.3 | 145  | 1.1 | 1.2 | 1.8  | AT1G73540 | MutT/nudix family protein                                     |
| <b>356</b> | 259015_at   | 125  | 1.3 | 2.2 | 3.3 | 75   | 2.5 | 5.0 | 6.4  | AT3G07350 | expressed protein                                             |
| <b>357</b> | 266899_at   | 248  | 1.0 | 1.9 | 3.3 | 568  | 1.3 | 0.9 | 0.6  | AT2G34620 | expressed protein                                             |
| <b>358</b> | 262228_at   | 76   | 1.4 | 2.5 | 3.2 | 67   | 0.9 | 1.1 | 6.3  | AT1G68690 | protein kinase family                                         |
| <b>359</b> | 255080_at   | 893  | 1.0 | 1.4 | 3.2 | 760  | 0.9 | 0.9 | 1.6  | AT4G09030 | arabinogalactan-protein (AGP10)                               |
| <b>360</b> | 253958_at   | 380  | 1.0 | 2.2 | 3.2 | 357  | 0.9 | 0.9 | 1.6  | AT4G26400 | expressed protein                                             |

|     |             |      |     |     |     |      |     |     |      |           |                                                                     |
|-----|-------------|------|-----|-----|-----|------|-----|-----|------|-----------|---------------------------------------------------------------------|
| 361 | 260639_at   | 94   | 1.1 | 2.2 | 3.2 | 121  | 0.7 | 0.8 | 1.3  | AT1G53180 | expressed protein                                                   |
| 362 | 250099_at   | 73   | 2.0 | 2.9 | 3.2 | 87   | 0.7 | 1.0 | 1.2  | AT5G17300 | expressed protein                                                   |
| 363 | 247793_at   | 276  | 1.7 | 2.5 | 3.2 | 173  | 1.4 | 1.0 | 1.2  | AT5G58650 | expressed protein                                                   |
| 364 | 250018_at   | 833  | 0.9 | 1.7 | 3.2 | 735  | 1.2 | 1.0 | 1.6  | AT5G18150 | expressed protein                                                   |
| 365 | 266371_at   | 1590 | 0.9 | 2.9 | 3.2 | 1612 | 1.0 | 1.7 | 4.8  | AT2G41410 | calmodulin, putative                                                |
| 366 | 266606_at   | 96   | 2.0 | 3.1 | 3.2 | 29   | 2.8 | 3.0 | 10.5 | AT2G46310 | AP2 domain transcription factor, putative                           |
| 367 | 255895_at   | 475  | 1.5 | 2.5 | 3.2 | 211  | 1.1 | 1.8 | 4.3  | AT1G17990 | 12-oxophytodienoate reductase, putative                             |
| 368 | 246870_at   | 1319 | 1.6 | 3.3 | 3.2 | 1088 | 0.9 | 1.1 | 2.7  | AT5G26030 | ferrochelataase-I                                                   |
| 369 | 257061_at   | 79   | 1.1 | 1.9 | 3.2 | 73   | 0.9 | 1.5 | 8.6  | AT3G18250 | hypothetical protein                                                |
| 370 | 247704_at   | 57   | 1.5 | 3.4 | 3.2 | 29   | 1.9 | 0.9 | 6.9  | AT5G59510 | expressed protein                                                   |
| 371 | 256877_at   | 386  | 1.7 | 2.6 | 3.2 | 365  | 0.9 | 1.4 | 5.1  | AT3G26470 | expressed protein                                                   |
| 372 | 264580_at   | 88   | 1.6 | 2.6 | 3.2 | 106  | 1.2 | 1.8 | 12.3 | AT1G05340 | expressed protein                                                   |
| 373 | 266834_s_at | 126  | 1.2 | 2.3 | 3.2 | 146  | 0.9 | 0.8 | 1.2  | AT2G30020 | protein phosphatase 2C (PP2C), putative                             |
| 374 | 252373_at   | 227  | 1.4 | 2.6 | 3.2 | 188  | 0.9 | 1.2 | 8.1  | AT3G48090 | disease resistance protein (EDS1)                                   |
| 375 | 260915_at   | 110  | 1.6 | 2.8 | 3.2 | 69   | 1.5 | 1.1 | 3.4  | AT1G02660 | lipase (class 3) family                                             |
| 376 | 255479_at   | 3572 | 1.2 | 2.5 | 3.2 | 2102 | 0.8 | 0.7 | 3.1  | AT4G02380 | late embryogenesis abundant protein family                          |
| 377 | 257407_at   | 616  | 1.2 | 2.4 | 3.2 | 743  | 0.8 | 0.8 | 1.5  | AT1G27100 | expressed protein                                                   |
| 378 | 257262_at   | 331  | 5.9 | 5.8 | 3.2 | 140  | 0.8 | 0.7 | 1.2  | AT3G21890 | CONSTANS B-box zinc finger family protein                           |
| 379 | 257925_at   | 300  | 1.6 | 2.4 | 3.1 | 358  | 0.9 | 1.0 | 1.6  | AT3G23170 | expressed protein                                                   |
| 380 | 251035_at   | 65   | 2.2 | 3.1 | 3.1 | 68   | 0.8 | 1.3 | 2.9  | AT5G02220 | expressed protein                                                   |
| 381 | 248683_at   | 263  | 1.0 | 1.7 | 3.1 | 186  | 1.0 | 0.8 | 0.5  | AT5G48490 | protease inhibitor/seed storage/lipid transfer protein (LTP) family |
| 382 | 260603_at   | 377  | 1.4 | 1.6 | 3.1 | 151  | 1.3 | 1.9 | 3.3  | AT1G55960 | membrane related protein CP5 -related                               |
| 383 | 264223_s_at | 37   | 1.2 | 2.9 | 3.1 | 72   | 0.6 | 0.9 | 3.9  | AT1G67520 | receptor kinase -related                                            |
| 384 | 251017_at   | 452  | 0.6 | 1.1 | 3.1 | 217  | 1.0 | 0.9 | 1.7  | AT5G02760 | protein phosphatase - like protein                                  |
| 385 | 248821_at   | 227  | 0.9 | 2.4 | 3.1 | 229  | 0.9 | 1.1 | 4.5  | AT5G47070 | protein kinase, putative                                            |
| 386 | 258452_at   | 1943 | 2.2 | 4.0 | 3.1 | 1149 | 1.2 | 2.2 | 6.9  | AT3G22370 | alternative oxidase 1a, mitochondrial (AOX1A)                       |
| 387 | 245757_at   | 171  | 0.8 | 2.1 | 3.1 | 140  | 1.1 | 0.9 | 0.7  | AT1G35140 | phosphate-induced (phi-1) protein -related                          |
| 388 | 254694_at   | 577  | 1.1 | 2.9 | 3.1 | 688  | 1.3 | 1.2 | 2.6  | AT4G17900 | expressed protein                                                   |
| 389 | 258608_at   | 251  | 1.4 | 1.9 | 3.1 | 123  | 1.0 | 1.6 | 5.3  | AT3G03020 | expressed protein                                                   |
| 390 | 254204_at   | 777  | 1.5 | 3.6 | 3.1 | 749  | 1.0 | 1.0 | 2.2  | AT4G24160 | hydrolase, alpha/beta fold family                                   |
| 391 | 264379_at   | 91   | 1.0 | 1.8 | 3.1 | 91   | 1.0 | 1.5 | 1.6  | AT2G25200 | expressed protein                                                   |
| 392 | 252474_at   | 534  | 1.3 | 3.3 | 3.1 | 427  | 0.8 | 1.0 | 2.6  | AT3G46620 | expressed protein                                                   |
| 393 | 266737_at   | 113  | 1.3 | 2.5 | 3.1 | 125  | 0.8 | 0.7 | 2.8  | AT2G47140 | short-chain dehydrogenase/reductase family protein                  |
| 394 | 261453_at   | 137  | 1.2 | 2.3 | 3.1 | 85   | 1.0 | 1.1 | 1.4  | AT1G21130 | O-methyltransferase 1, putative                                     |
| 395 | 263935_at   | 285  | 0.8 | 2.5 | 3.1 | 333  | 0.8 | 0.6 | 1.8  | AT2G35930 | expressed protein                                                   |
| 396 | 250829_at   | 469  | 1.1 | 3.4 | 3.1 | 447  | 1.0 | 1.4 | 4.2  | AT5G04720 | disease resistance protein (CC-NBS-LRR class), putative             |
| 397 | 259875_s_at | 2152 | 1.7 | 3.2 | 3.1 | 2290 | 1.1 | 1.4 | 2.0  | AT1G76690 | 12-oxophytodienoate reductase (OPR2)                                |

|     |             |      |     |     |     |     |     |     |      |           |                                                                                                                                                            |
|-----|-------------|------|-----|-----|-----|-----|-----|-----|------|-----------|------------------------------------------------------------------------------------------------------------------------------------------------------------|
| 398 | 249377_at   | 296  | 1.7 | 4.3 | 3.1 | 337 | 1.1 | 1.4 | 5.2  | AT5G40690 | expressed protein                                                                                                                                          |
| 399 | 267230_at   | 450  | 1.0 | 1.7 | 3.1 | 310 | 1.0 | 1.4 | 2.2  | AT2G44080 | expressed protein                                                                                                                                          |
| 400 | 260239_at   | 110  | 1.2 | 3.1 | 3.0 | 72  | 1.2 | 1.5 | 10.3 | AT1G74360 | leucine-rich repeat transmembrane protein kinase, putative                                                                                                 |
| 401 | 246631_at   | 635  | 1.4 | 2.6 | 3.0 | 641 | 1.0 | 1.0 | 1.9  | AT1G50740 | expressed protein                                                                                                                                          |
| 402 | 255543_at   | 1163 | 1.4 | 3.7 | 3.0 | 839 | 0.9 | 2.0 | 6.9  | AT4G01870 | expressed protein                                                                                                                                          |
| 403 | 245193_at   | 250  | 1.8 | 3.0 | 3.0 | 249 | 1.0 | 1.4 | 3.3  | AT1G67810 | F12A21.6                                                                                                                                                   |
| 404 | 249485_at   | 90   | 1.2 | 3.3 | 3.0 | 72  | 0.5 | 0.7 | 2.1  | AT5G39020 | protein kinase family                                                                                                                                      |
| 405 | 265536_at   | 182  | 1.2 | 2.1 | 3.0 | 64  | 2.6 | 3.9 | 4.2  | AT2G15880 | leucine-rich repeat extensin family                                                                                                                        |
| 406 | 266017_at   | 320  | 1.6 | 2.9 | 3.0 | 166 | 1.0 | 1.8 | 11.0 | AT2G18690 | expressed protein                                                                                                                                          |
| 407 | 245277_at   | 667  | 2.2 | 2.8 | 3.0 | 415 | 1.1 | 1.6 | 2.2  | AT4G15550 | UDP-glucose:indole-3-acetate beta-D-glucosyltransferase (iaglu)                                                                                            |
| 408 | 266825_at   | 114  | 1.3 | 2.2 | 3.0 | 191 | 0.8 | 0.7 | 0.6  | AT2G22890 | hypothetical protein                                                                                                                                       |
| 409 | 260296_at   | 112  | 0.9 | 2.4 | 3.0 | 115 | 1.1 | 1.0 | 1.3  | AT1G63750 | disease resistance protein (TIR-NBS-LRR class), putative                                                                                                   |
| 410 | 245247_at   | 463  | 1.0 | 3.0 | 3.0 | 355 | 1.2 | 1.3 | 4.5  | AT4G17230 | scarecrow-like transcription factor 13 (SCL13)                                                                                                             |
| 411 | 252193_at   | 245  | 1.0 | 2.7 | 2.9 | 290 | 0.7 | 0.9 | 1.4  | AT3G50060 | myb DNA-binding protein (MYB77)                                                                                                                            |
| 412 | 257785_at   | 133  | 1.5 | 2.4 | 2.9 | 216 | 1.0 | 0.9 | 2.1  | AT3G26980 | ubiquitin family                                                                                                                                           |
| 413 | 255502_at   | 303  | 1.3 | 3.3 | 2.9 | 194 | 0.9 | 1.1 | 4.8  | AT4G02410 | contains similarity to a protein kinase domain (Pfam: pkinase.hmm, score: 166.20) and to legume lectins beta domain (Pfam: lectin_legB.hmm, score: 139.32) |
| 414 | 252825_at   | 72   | 1.5 | 2.5 | 2.9 | 44  | 4.2 | 2.7 | 9.9  | AT4G39890 | Ras family GTP-binding protein                                                                                                                             |
| 415 | 265841_at   | 49   | 1.2 | 2.2 | 2.9 | 45  | 1.2 | 0.6 | 1.2  | AT2G35710 | glycogenin glucosyltransferase (glycogenin) - related                                                                                                      |
| 416 | 255742_at   | 243  | 1.4 | 3.1 | 2.9 | 322 | 1.2 | 2.0 | 4.4  | AT1G25560 | AP2 domain transcription factor, putative                                                                                                                  |
| 417 | 255844_at   | 111  | 1.2 | 2.2 | 2.9 | 126 | 0.9 | 1.0 | 2.2  | AT2G33580 | protein kinase -related                                                                                                                                    |
| 418 | 245765_at   | 1006 | 1.7 | 3.0 | 2.9 | 557 | 0.9 | 0.9 | 3.2  | AT1G33600 | leucine rich repeat protein family                                                                                                                         |
| 419 | 259213_at   | 83   | 1.6 | 2.2 | 2.9 | 128 | 0.8 | 0.8 | 3.3  | AT3G09010 | protein kinase family                                                                                                                                      |
| 420 | 251937_at   | 260  | 1.2 | 2.6 | 2.9 | 346 | 1.1 | 1.2 | 1.1  | AT3G53400 | expressed protein                                                                                                                                          |
| 421 | 263823_s_at | 169  | 2.2 | 4.0 | 2.9 | 147 | 1.0 | 1.6 | 5.1  | AT2G40350 | AP2 domain transcription factor, putative (DREB2)                                                                                                          |
| 422 | 267063_at   | 455  | 1.1 | 2.0 | 2.9 | 418 | 0.9 | 1.1 | 1.8  | AT2G41120 | expressed protein                                                                                                                                          |
| 423 | 247811_at   | 456  | 1.0 | 2.2 | 2.9 | 355 | 1.0 | 1.2 | 3.2  | AT5G58430 | leucine zipper-containing protein                                                                                                                          |
| 424 | 247137_at   | 327  | 1.4 | 2.6 | 2.9 | 258 | 1.1 | 1.4 | 3.1  | AT5G66210 | calcium-dependent protein kinase                                                                                                                           |
| 425 | 249987_at   | 227  | 1.2 | 2.6 | 2.9 | 198 | 1.0 | 0.9 | 3.1  | AT5G18490 | expressed protein                                                                                                                                          |
| 426 | 261719_at   | 156  | 1.7 | 2.4 | 2.9 | 160 | 0.9 | 0.9 | 4.9  | AT1G18380 | hypothetical protein                                                                                                                                       |
| 427 | 265499_at   | 237  | 2.0 | 3.6 | 2.9 | 161 | 0.8 | 1.5 | 6.6  | AT2G15480 | glucosyltransferase -related                                                                                                                               |
| 428 | 247393_at   | 252  | 1.2 | 1.8 | 2.9 | 195 | 1.0 | 0.9 | 2.2  | AT5G63130 | octicosapeptide/Phox/Bem1p (PB1) domain-containing protein                                                                                                 |
| 429 | 248050_at   | 399  | 0.8 | 1.5 | 2.9 | 221 | 1.1 | 0.9 | 2.0  | AT5G56100 | oleosin                                                                                                                                                    |
| 430 | 261459_at   | 287  | 1.2 | 1.9 | 2.8 | 140 | 1.2 | 0.6 | 0.7  | AT1G21100 | O-methyltransferase 1, putative                                                                                                                            |
| 431 | 249622_at   | 159  | 2.2 | 3.3 | 2.8 | 114 | 1.9 | 1.7 | 2.4  | AT5G37550 | expressed protein                                                                                                                                          |

|            |             |      |     |     |     |      |     |      |      |           |                                                          |
|------------|-------------|------|-----|-----|-----|------|-----|------|------|-----------|----------------------------------------------------------|
| <b>432</b> | 263515_at   | 128  | 1.7 | 3.5 | 2.8 | 95   | 1.3 | 14.3 | 33.6 | AT2G21640 | expressed protein                                        |
| <b>433</b> | 266259_at   | 166  | 1.3 | 2.2 | 2.8 | 254  | 1.2 | 1.8  | 2.8  | AT2G27830 | expressed protein                                        |
| <b>434</b> | 253377_at   | 690  | 1.6 | 3.4 | 2.8 | 562  | 1.1 | 1.3  | 3.6  | AT4G33300 | disease resistance protein (CC-NBS-LRR class), putative  |
| <b>435</b> | 251621_at   | 57   | 1.7 | 2.0 | 2.8 | 48   | 1.4 | 1.2  | 12.6 | AT3G57700 | protein kinase, putative                                 |
| <b>436</b> | 254919_at   | 947  | 0.9 | 1.5 | 2.8 | 890  | 1.2 | 1.2  | 1.0  | AT4G11360 | RING-H2 finger protein RHA1b                             |
| <b>437</b> | 264680_at   | 65   | 1.3 | 2.3 | 2.8 | 63   | 0.7 | 0.7  | 1.1  | AT1G65510 | expressed protein                                        |
| <b>438</b> | 246305_at   | 306  | 1.6 | 2.7 | 2.8 | 257  | 0.9 | 1.2  | 5.4  | AT3G51890 | expressed protein                                        |
| <b>439</b> | 262518_at   | 726  | 1.4 | 4.7 | 2.8 | 1255 | 1.0 | 3.1  | 5.4  | AT1G17170 | glutathione transferase, putative                        |
| <b>440</b> | 257206_at   | 879  | 1.9 | 3.0 | 2.8 | 709  | 1.4 | 2.9  | 6.1  | AT3G16530 | lectin -related                                          |
| <b>441</b> | 260741_at   | 51   | 1.6 | 3.6 | 2.8 | 42   | 1.8 | 3.4  | 1.5  | AT1G15040 | expressed protein                                        |
| <b>442</b> | 260135_at   | 82   | 0.8 | 1.8 | 2.8 | 95   | 1.0 | 1.0  | 1.2  | AT1G66400 | calmodulin-related protein, putative                     |
| <b>443</b> | 261161_at   | 125  | 1.5 | 2.4 | 2.8 | 166  | 1.4 | 0.8  | 2.9  | AT1G34420 | leucine rich repeat protein kinase family                |
| <b>444</b> | 263704_at   | 935  | 1.0 | 2.1 | 2.8 | 850  | 1.2 | 1.1  | 2.2  | AT1G31130 | expressed protein                                        |
| <b>445</b> | 256755_at   | 415  | 1.1 | 2.2 | 2.8 | 391  | 1.0 | 0.9  | 1.9  | AT3G25600 | calmodulin, putative                                     |
| <b>446</b> | 245738_at   | 27   | 4.6 | 1.8 | 2.8 | 40   | 0.7 | 1.2  | 13.9 | AT1G44130 | nucellin protein, putative                               |
| <b>447</b> | 253824_at   | 275  | 2.1 | 3.5 | 2.8 | 267  | 0.9 | 1.5  | 6.2  | AT4G27940 | mitochondrial carrier protein family                     |
| <b>448</b> | 261449_at   | 88   | 1.3 | 1.8 | 2.8 | 74   | 0.6 | 0.7  | 0.8  | AT1G21120 | O-methyltransferase 1, putative                          |
| <b>449</b> | 256969_at   | 195  | 1.3 | 2.0 | 2.8 | 149  | 1.2 | 1.7  | 3.4  | AT3G21080 | expressed protein                                        |
| <b>450</b> | 247848_at   | 165  | 1.1 | 2.2 | 2.8 | 225  | 1.1 | 0.9  | 1.0  | AT5G58120 | disease resistance protein (TIR-NBS-LRR class), putative |
| <b>451</b> | 250990_at   | 492  | 1.0 | 2.6 | 2.8 | 427  | 1.1 | 1.1  | 2.5  | AT5G02290 | protein kinase, putative                                 |
| <b>452</b> | 251636_at   | 652  | 1.3 | 2.8 | 2.8 | 519  | 1.2 | 1.2  | 3.2  | AT3G57530 | calcium-dependent protein kinase, putative (CDPK)        |
| <b>453</b> | 264887_at   | 156  | 1.0 | 1.8 | 2.7 | 199  | 0.7 | 0.8  | 0.9  | AT1G23120 | major latex protein (MLP)-related                        |
| <b>454</b> | 247754_at   | 120  | 1.0 | 1.2 | 2.7 | 105  | 0.7 | 0.6  | 1.1  | AT5G59080 | expressed protein                                        |
| <b>455</b> | 246600_at   | 111  | 1.6 | 2.1 | 2.7 | 140  | 0.9 | 1.2  | 2.5  | AT5G14930 | leaf senescence-associated protein (SAG101)              |
| <b>456</b> | 266364_at   | 108  | 1.3 | 1.7 | 2.7 | 131  | 1.0 | 0.9  | 1.3  | AT2G41230 | expressed protein                                        |
| <b>457</b> | 249923_at   | 506  | 0.8 | 1.5 | 2.7 | 615  | 0.9 | 1.8  | 1.8  | AT5G19120 | conglutin gamma - like protein                           |
| <b>458</b> | 257081_at   | 149  | 3.0 | 3.8 | 2.7 | 184  | 1.3 | 1.0  | 0.9  | AT3G30460 | C3HC4-type zinc finger protein family                    |
| <b>459</b> | 267381_at   | 382  | 1.1 | 2.8 | 2.7 | 348  | 1.0 | 1.0  | 2.0  | AT2G26190 | expressed protein                                        |
| <b>460</b> | 261027_at   | 98   | 1.6 | 3.3 | 2.7 | 139  | 0.8 | 1.5  | 6.8  | AT1G01340 | cyclic nucleotide-regulated ion channel (CNGC10/ACBK1)   |
| <b>461</b> | 257748_at   | 107  | 1.4 | 1.6 | 2.7 | 160  | 1.0 | 0.6  | 0.7  | AT3G18710 | expressed protein                                        |
| <b>462</b> | 249237_at   | 2072 | 1.5 | 2.8 | 2.7 | 1559 | 1.0 | 1.3  | 4.2  | AT5G42050 | expressed protein                                        |
| <b>463</b> | 253268_s_at | 726  | 1.7 | 4.2 | 2.7 | 992  | 1.0 | 1.9  | 4.2  | AT4G34135 | glucosyltransferase -related protein                     |
| <b>464</b> | 252652_at   | 379  | 1.5 | 2.3 | 2.7 | 253  | 1.2 | 1.3  | 2.2  | AT3G44720 | prephenate dehydratase family                            |
| <b>465</b> | 252939_at   | 129  | 1.3 | 2.6 | 2.7 | 162  | 0.9 | 1.0  | 2.4  | AT4G39230 | isoflavone reductase, putative                           |
| <b>466</b> | 265626_at   | 712  | 1.2 | 1.8 | 2.7 | 647  | 0.9 | 1.1  | 2.0  | AT2G27260 | expressed protein                                        |
| <b>467</b> | 256050_at   | 272  | 1.5 | 2.6 | 2.7 | 176  | 1.0 | 1.0  | 4.2  | AT1G07000 | exocyst subunit EXO70 family                             |
| <b>468</b> | 253140_at   | 413  | 1.4 | 2.4 | 2.7 | 319  | 1.0 | 1.0  | 3.0  | AT4G35480 | RING-H2 finger protein RHA3b                             |

|     |           |      |     |     |     |      |     |     |      |           |                                                                                           |
|-----|-----------|------|-----|-----|-----|------|-----|-----|------|-----------|-------------------------------------------------------------------------------------------|
| 469 | 254063_at | 197  | 1.2 | 3.4 | 2.7 | 147  | 0.9 | 1.1 | 4.7  | AT4G25390 | protein kinase family                                                                     |
| 470 | 246858_at | 242  | 1.9 | 3.7 | 2.7 | 175  | 1.1 | 0.7 | 3.8  | AT5G25930 | receptor-related protein kinase - like                                                    |
| 471 | 245768_at | 1616 | 1.2 | 2.3 | 2.7 | 1563 | 1.0 | 1.2 | 2.3  | AT1G33590 | disease resistance protein-related (LRR)                                                  |
| 472 | 260431_at | 106  | 1.8 | 1.3 | 2.7 | 79   | 1.3 | 0.7 | 0.6  | AT1G68190 | CONSTANS B-box zinc finger family protein                                                 |
| 473 | 246385_at | 57   | 1.6 | 2.7 | 2.7 | 94   | 1.0 | 0.9 | 1.1  | AT1G77390 | cyclin, putative                                                                          |
| 474 | 267384_at | 147  | 3.0 | 3.3 | 2.7 | 139  | 0.6 | 1.1 | 3.8  | AT2G44370 | CHP-rich zinc finger protein, putative                                                    |
| 475 | 248875_at | 94   | 1.6 | 4.2 | 2.6 | 84   | 1.3 | 1.6 | 3.6  | AT5G46470 | disease resistance protein (TIR-NBS-LRR class), putative                                  |
| 476 | 258321_at | 3369 | 4.5 | 3.8 | 2.6 | 466  | 1.1 | 4.7 | 7.3  | AT3G22840 | early light-induced protein                                                               |
| 477 | 264510_at | 254  | 0.9 | 1.4 | 2.6 | 221  | 1.1 | 1.1 | 1.4  | AT1G09530 | phytochrome interacting factor 3 (PIF3)                                                   |
| 478 | 248814_at | 142  | 1.0 | 2.2 | 2.6 | 161  | 1.2 | 0.7 | 2.2  | AT5G46910 | hypothetical protein                                                                      |
| 479 | 258683_at | 174  | 1.1 | 2.8 | 2.6 | 238  | 0.9 | 0.8 | 2.0  | AT3G08760 | protein kinase family                                                                     |
| 480 | 259076_at | 61   | 3.7 | 3.8 | 2.6 | 129  | 0.7 | 0.8 | 1.3  | AT3G02140 | expressed protein                                                                         |
| 481 | 266749_at | 859  | 1.2 | 2.4 | 2.6 | 838  | 1.0 | 0.8 | 1.2  | AT2G47060 | serine/threonine protein kinase, putative                                                 |
| 482 | 261650_at | 692  | 1.5 | 2.8 | 2.6 | 603  | 0.9 | 1.0 | 3.2  | AT1G27770 | calcium-transporting ATPase 1, plasma membrane-type (Ca <sup>2+</sup> -ATPase, isoform 1) |
| 483 | 253997_at | 110  | 1.5 | 2.4 | 2.6 | 88   | 0.9 | 1.0 | 3.4  | AT4G26090 | disease resistance protein RPS2 (CC-NBS-LRR class), putative                              |
| 484 | 250149_at | 277  | 1.3 | 2.5 | 2.6 | 241  | 1.1 | 0.8 | 0.8  | AT5G14700 | cinnamoyl-CoA reductase-related                                                           |
| 485 | 266983_at | 261  | 1.2 | 2.5 | 2.6 | 245  | 1.1 | 1.3 | 3.0  | AT2G39400 | hydrolase, alpha/beta fold family                                                         |
| 486 | 250781_at | 458  | 4.3 | 4.5 | 2.6 | 228  | 1.0 | 1.6 | 6.6  | AT5G05410 | DRE binding protein (DREB2A)                                                              |
| 487 | 260744_at | 59   | 1.0 | 0.9 | 2.6 | 56   | 0.9 | 0.9 | 1.1  | AT1G15010 | expressed protein                                                                         |
| 488 | 259297_at | 72   | 1.6 | 3.3 | 2.6 | 94   | 1.4 | 2.1 | 12.3 | AT3G05360 | disease resistance protein family (LRR)                                                   |
| 489 | 250666_at | 146  | 1.2 | 2.3 | 2.6 | 53   | 1.4 | 2.6 | 10.7 | AT5G07100 | WRKY family transcription factor                                                          |
| 490 | 247240_at | 201  | 1.1 | 1.7 | 2.6 | 183  | 1.2 | 1.0 | 1.9  | AT5G64660 | expressed protein                                                                         |
| 491 | 253464_at | 299  | 1.2 | 1.8 | 2.6 | 329  | 1.0 | 1.1 | 2.0  | AT4G32030 | expressed protein                                                                         |
| 492 | 258998_at | 374  | 1.5 | 2.7 | 2.6 | 343  | 0.9 | 1.5 | 2.9  | AT3G01820 | adenylate kinase -related                                                                 |
| 493 | 252081_at | 98   | 1.1 | 2.4 | 2.6 | 149  | 1.1 | 0.6 | 0.7  | AT3G51910 | heat shock transcription factor family                                                    |
| 494 | 249746_at | 314  | 1.3 | 2.2 | 2.5 | 257  | 1.1 | 0.9 | 2.6  | AT5G24590 | No apical meristem (NAM) protein family                                                   |
| 495 | 266083_at | 38   | 1.1 | 3.2 | 2.5 | 84   | 0.8 | 0.4 | 0.8  | AT2G37820 | CHP-rich zinc finger protein, putative                                                    |
| 496 | 260904_at | 35   | 1.1 | 1.8 | 2.5 | 19   | 4.4 | 2.3 | 53.8 | AT1G02450 | expressed protein                                                                         |
| 497 | 249780_at | 151  | 1.4 | 2.6 | 2.5 | 237  | 0.9 | 1.6 | 4.4  | AT5G24240 | ubiquitin family                                                                          |
| 498 | 245051_at | 585  | 1.1 | 1.9 | 2.5 | 618  | 0.9 | 1.0 | 2.6  | AT2G23320 | WRKY family transcription factor                                                          |
| 499 | 259410_at | 88   | 0.9 | 1.8 | 2.5 | 81   | 1.2 | 1.2 | 11.8 | AT1G13340 | expressed protein                                                                         |
| 500 | 257784_at | 308  | 1.1 | 1.8 | 2.5 | 328  | 1.2 | 1.0 | 2.7  | AT3G26980 | ubiquitin family                                                                          |
| 501 | 265387_at | 205  | 1.3 | 2.4 | 2.5 | 108  | 1.2 | 2.0 | 4.3  | AT2G20670 | expressed protein                                                                         |
| 502 | 263799_at | 335  | 1.1 | 1.9 | 2.5 | 576  | 0.8 | 0.9 | 1.5  | AT2G24550 | expressed protein                                                                         |
| 503 | 254289_at | 63   | 1.8 | 2.8 | 2.5 | 78   | 1.5 | 1.3 | 4.9  | AT4G22980 | hypothetical protein                                                                      |
| 504 | 266618_at | 113  | 1.8 | 3.5 | 2.5 | 120  | 0.9 | 1.7 | 6.5  | AT2G35480 | expressed protein                                                                         |

|     |             |      |     |     |     |      |     |     |     |           |                                                                     |
|-----|-------------|------|-----|-----|-----|------|-----|-----|-----|-----------|---------------------------------------------------------------------|
| 505 | 245324_at   | 499  | 1.3 | 2.7 | 2.5 | 707  | 1.0 | 1.0 | 4.7 | AT4G17260 | L-lactate dehydrogenase (LDH), putative                             |
| 506 | 267104_at   | 5187 | 1.1 | 1.7 | 2.5 | 5323 | 1.1 | 1.1 | 1.3 | AT2G41430 | ERD15 protein                                                       |
| 507 | 252045_at   | 221  | 1.7 | 2.9 | 2.5 | 178  | 1.1 | 1.1 | 2.5 | AT3G52450 | expressed protein                                                   |
| 508 | 260772_at   | 572  | 1.1 | 2.4 | 2.5 | 429  | 1.0 | 1.3 | 4.4 | AT1G49050 | expressed protein                                                   |
| 509 | 248566_s_at | 1856 | 1.2 | 1.8 | 2.5 | 1217 | 1.3 | 1.2 | 1.3 | AT5G49730 | ferric reductase-like transmembrane component family                |
| 510 | 263478_at   | 1018 | 1.3 | 2.5 | 2.5 | 917  | 1.0 | 1.0 | 3.4 | AT2G31880 | leucine-rich repeat transmembrane protein kinase, putative          |
| 511 | 258665_at   | 766  | 1.0 | 1.8 | 2.5 | 850  | 1.0 | 1.0 | 2.2 | AT3G08710 | thioredoxin family                                                  |
| 512 | 257615_at   | 692  | 1.5 | 1.9 | 2.5 | 1169 | 1.3 | 1.9 | 1.6 | AT3G26510 | octicosapeptide/Phox/Bem1p (PB1) domain-containing protein          |
| 513 | 250000_at   | 1142 | 1.0 | 1.5 | 2.5 | 1478 | 0.9 | 1.1 | 1.4 | AT5G18650 | expressed protein                                                   |
| 514 | 251895_at   | 464  | 2.2 | 2.8 | 2.5 | 312  | 1.2 | 1.9 | 6.9 | AT3G54420 | glycosyl hydrolase family 19 (class IV chitinase)                   |
| 515 | 246931_at   | 373  | 0.8 | 1.9 | 2.5 | 361  | 0.9 | 0.8 | 1.4 | AT5G25170 | expressed protein                                                   |
| 516 | 260327_at   | 1295 | 1.5 | 2.4 | 2.5 | 1080 | 1.0 | 1.2 | 3.0 | AT1G63840 | RING-H2 finger protein, putative                                    |
| 517 | 267591_at   | 92   | 0.8 | 0.6 | 2.5 | 193  | 1.2 | 1.0 | 1.0 | AT2G39705 | expressed protein                                                   |
| 518 | 256569_at   | 48   | 1.0 | 1.5 | 2.5 | 77   | 0.4 | 0.2 | 0.6 | AT3G19550 | expressed protein                                                   |
| 519 | 250279_at   | 414  | 1.4 | 2.4 | 2.5 | 485  | 1.0 | 1.1 | 6.5 | AT5G13200 | GRAM domain-containing protein                                      |
| 520 | 265772_at   | 159  | 0.8 | 1.3 | 2.5 | 169  | 0.7 | 0.8 | 1.4 | AT2G48010 | serine/threonine protein kinase, putative (RFK3)                    |
| 521 | 262237_at   | 731  | 1.6 | 2.1 | 2.4 | 712  | 1.0 | 1.2 | 2.1 | AT1G48320 | thioesterase family                                                 |
| 522 | 249494_at   | 358  | 2.0 | 3.3 | 2.4 | 337  | 1.1 | 2.3 | 8.9 | AT5G39050 | transferase family                                                  |
| 523 | 261327_at   | 129  | 1.2 | 2.1 | 2.4 | 129  | 0.9 | 0.9 | 1.0 | AT1G44830 | AP2 domain transcription factor TINY, putative                      |
| 524 | 255568_at   | 93   | 1.1 | 1.8 | 2.4 | 114  | 0.9 | 0.8 | 1.5 | AT4G01250 | WRKY family transcription factor                                    |
| 525 | 267036_at   | 361  | 1.2 | 1.9 | 2.4 | 293  | 1.3 | 1.4 | 3.6 | AT2G38465 | expressed protein                                                   |
| 526 | 248964_at   | 121  | 1.3 | 2.1 | 2.4 | 84   | 1.2 | 1.0 | 1.6 | AT5G45340 | cytochrome P450 family                                              |
| 527 | 264774_at   | 312  | 1.3 | 2.0 | 2.4 | 115  | 0.8 | 1.4 | 5.4 | AT1G22890 | hypothetical protein                                                |
| 528 | 262126_at   | 67   | 1.2 | 2.1 | 2.4 | 99   | 0.9 | 1.0 | 1.9 | AT1G59620 | disease resistance protein (CC-NBS class), putative                 |
| 529 | 253696_at   | 113  | 1.6 | 1.8 | 2.4 | 153  | 0.7 | 1.0 | 1.3 | AT4G29740 | cytokinin oxidase family                                            |
| 530 | 255011_at   | 903  | 2.3 | 3.0 | 2.4 | 509  | 1.1 | 2.5 | 5.0 | AT4G10040 | cytochrome c                                                        |
| 531 | 256093_at   | 222  | 0.7 | 2.1 | 2.4 | 286  | 1.4 | 0.7 | 0.6 | AT1G20823 | RING zinc finger protein -related                                   |
| 532 | 245209_at   | 131  | 0.8 | 1.8 | 2.4 | 111  | 1.4 | 1.4 | 3.0 | AT5G12340 | hypothetical protein                                                |
| 533 | 259518_at   | 511  | 1.2 | 1.9 | 2.4 | 355  | 1.1 | 1.3 | 2.7 | AT1G20510 | 4-coumarate:CoA ligase 1 (4-coumaroyl-CoA synthase 1) (4CL1) family |
| 534 | 246744_at   | 1425 | 1.3 | 2.2 | 2.4 | 1688 | 1.0 | 1.9 | 3.8 | AT5G27760 | expressed protein                                                   |
| 535 | 249480_s_at | 523  | 1.4 | 2.1 | 2.4 | 619  | 1.2 | 1.0 | 1.4 | AT5G38990 | protein kinase family                                               |
| 536 | 249078_at   | 934  | 1.5 | 2.5 | 2.4 | 1040 | 1.0 | 1.1 | 2.4 | AT5G44070 | phytochelatin synthase (gb AAD41794.1)                              |
| 537 | 265713_at   | 299  | 0.9 | 1.8 | 2.4 | 278  | 1.2 | 0.8 | 1.2 | AT2G03530 | integral membrane protein -related                                  |
| 538 | 247044_at   | 190  | 1.2 | 2.1 | 2.4 | 233  | 1.0 | 1.2 | 4.2 | AT5G66850 | MAP protein kinase                                                  |
| 539 | 247800_at   | 202  | 0.7 | 2.2 | 2.4 | 385  | 1.2 | 3.3 | 5.5 | AT5G58570 | expressed protein                                                   |
| 540 | 258855_at   | 259  | 1.2 | 1.8 | 2.4 | 252  | 0.9 | 1.0 | 2.1 | AT3G02070 | expressed protein                                                   |

|     |             |      |      |     |     |      |     |     |      |           |                                                                     |
|-----|-------------|------|------|-----|-----|------|-----|-----|------|-----------|---------------------------------------------------------------------|
| 541 | 251137_at   | 230  | 3.3  | 3.5 | 2.4 | 110  | 1.2 | 1.6 | 2.6  | AT5G01300 | expressed protein                                                   |
| 542 | 258551_at   | 99   | 1.1  | 1.3 | 2.4 | 147  | 0.9 | 0.7 | 0.6  | AT3G06890 | expressed protein                                                   |
| 543 | 254321_at   | 376  | 1.5  | 2.7 | 2.4 | 474  | 1.0 | 1.1 | 3.5  | AT4G22590 | trehalose-6-phosphate phosphatase, putative                         |
| 544 | 254042_at   | 90   | 1.0  | 1.5 | 2.4 | 45   | 2.1 | 1.8 | 2.2  | AT4G25810 | xyloglucan endotransglycosylase (XTR-6)                             |
| 545 | 264380_at   | 232  | 1.5  | 1.7 | 2.4 | 290  | 1.0 | 0.7 | 1.3  | AT2G25190 | expressed protein                                                   |
| 546 | 258915_at   | 318  | 1.0  | 1.9 | 2.3 | 277  | 1.0 | 1.0 | 2.7  | AT3G10640 | expressed protein                                                   |
| 547 | 248914_at   | 814  | 1.1  | 1.8 | 2.3 | 876  | 0.9 | 0.8 | 1.1  | AT5G45750 | GTP-binding protein, putative                                       |
| 548 | 265892_at   | 70   | 29.9 | 3.8 | 2.3 | 32   | 5.0 | 0.9 | 3.7  | AT2G15020 | expressed protein                                                   |
| 549 | 267537_at   | 268  | 1.0  | 2.0 | 2.3 | 221  | 1.1 | 1.5 | 4.2  | AT2G41880 | guanylate kinase -related                                           |
| 550 | 262229_at   | 227  | 1.3  | 2.6 | 2.3 | 37   | 2.0 | 2.8 | 22.4 | AT1G68620 | expressed protein                                                   |
| 551 | 258501_at   | 309  | 1.1  | 1.8 | 2.3 | 274  | 1.3 | 1.1 | 2.2  | AT3G06780 | glycine-rich protein                                                |
| 552 | 254331_s_at | 3734 | 1.3  | 2.1 | 2.3 | 3745 | 1.0 | 0.9 | 1.1  | AT4G22710 | cytochrome P450 family                                              |
| 553 | 263019_at   | 149  | 1.4  | 1.7 | 2.3 | 135  | 1.2 | 1.4 | 1.6  | AT1G23870 | trehalose phosphatase family                                        |
| 554 | 262517_at   | 282  | 1.6  | 3.7 | 2.3 | 443  | 1.0 | 3.1 | 8.1  | AT1G17180 | glutathione transferase, putative                                   |
| 555 | 249552_s_at | 86   | 2.0  | 2.7 | 2.3 | 92   | 1.2 | 1.2 | 3.0  | AT5G38240 | serine/threonine protein kinase, putative                           |
| 556 | 251221_at   | 1922 | 0.6  | 1.1 | 2.3 | 5003 | 0.9 | 1.0 | 0.4  | AT3G62550 | expressed protein                                                   |
| 557 | 262360_at   | 270  | 1.3  | 2.1 | 2.3 | 211  | 1.1 | 0.7 | 2.9  | AT1G73080 | leucine-rich repeat transmembrane protein kinase, putative          |
| 558 | 258507_at   | 376  | 1.6  | 2.8 | 2.3 | 296  | 1.0 | 1.9 | 4.6  | AT3G06500 | neutral invertase -related                                          |
| 559 | 260314_at   | 1455 | 1.0  | 1.7 | 2.3 | 1185 | 1.0 | 1.0 | 2.3  | AT1G63830 | proline-rich protein family                                         |
| 560 | 264906_at   | 168  | 2.6  | 3.7 | 2.3 | 177  | 0.8 | 1.3 | 3.5  | AT2G17270 | mitochondrial carrier protein family                                |
| 561 | 252250_at   | 242  | 1.2  | 1.8 | 2.3 | 117  | 1.0 | 1.2 | 2.0  | AT3G49790 | expressed protein                                                   |
| 562 | 261973_at   | 155  | 1.2  | 2.0 | 2.3 | 115  | 1.0 | 1.2 | 3.0  | AT1G64610 | expressed protein                                                   |
| 563 | 259109_at   | 271  | 1.1  | 2.1 | 2.3 | 180  | 1.5 | 1.4 | 3.7  | AT3G05580 | serine/threonine protein phosphatase (PP1)                          |
| 564 | 266717_at   | 132  | 1.2  | 1.9 | 2.3 | 196  | 0.8 | 0.7 | 1.1  | AT2G46735 | expressed protein                                                   |
| 565 | 259850_at   | 93   | 1.3  | 2.7 | 2.3 | 80   | 1.0 | 0.8 | 2.2  | AT1G72240 | expressed protein                                                   |
| 566 | 249125_at   | 871  | 1.1  | 2.1 | 2.2 | 676  | 1.1 | 2.3 | 5.7  | AT5G43450 | 2-oxoglutarate-dependent dioxygenase, putative                      |
| 567 | 247474_at   | 89   | 1.8  | 0.8 | 2.2 | 21   | 3.0 | 1.2 | 8.7  | AT5G62280 | expressed protein                                                   |
| 568 | 258056_at   | 137  | 1.2  | 1.6 | 2.2 | 140  | 0.7 | 0.7 | 1.2  | AT3G29010 | hypothetical protein                                                |
| 569 | 262399_at   | 764  | 0.9  | 1.1 | 2.2 | 1333 | 1.2 | 1.1 | 0.7  | AT1G49500 | expressed protein                                                   |
| 570 | 252433_at   | 292  | 1.0  | 1.2 | 2.2 | 372  | 1.0 | 0.9 | 0.7  | AT3G47560 | esterase/lipase/thioesterase family                                 |
| 571 | 261144_s_at | 3649 | 0.8  | 1.3 | 2.2 | 3276 | 1.3 | 1.2 | 1.2  | AT1G19660 | expressed protein                                                   |
| 572 | 256425_at   | 324  | 1.4  | 2.8 | 2.2 | 348  | 0.9 | 1.3 | 3.0  | AT1G33560 | disease resistance protein (CC-NBS-LRR class), putative             |
| 573 | 263184_at   | 303  | 1.2  | 2.0 | 2.2 | 457  | 1.0 | 1.6 | 2.1  | AT1G05560 | UDP-glucose transferase(UGT1)                                       |
| 574 | 245505_at   | 84   | 1.2  | 1.7 | 2.2 | 17   | 6.5 | 3.6 | 3.4  | AT4G15690 | glutaredoxin protein family                                         |
| 575 | 252084_at   | 114  | 0.9  | 1.8 | 2.2 | 89   | 1.1 | 0.8 | 1.3  | AT3G51970 | long-chain-alcohol O-fatty-acyltransferase (wax synthase) family    |
| 576 | 254314_at   | 330  | 1.5  | 1.5 | 2.2 | 160  | 1.0 | 0.6 | 2.1  | AT4G22470 | protease inhibitor/seed storage/lipid transfer protein (LTP) family |



|            |           |      |     |     |     |      |     |     |      |           |                                                             |
|------------|-----------|------|-----|-----|-----|------|-----|-----|------|-----------|-------------------------------------------------------------|
| <b>577</b> | 253104_at | 316  | 1.1 | 2.6 | 2.2 | 446  | 0.9 | 1.4 | 6.1  | AT4G36010 | thaumatin family                                            |
| <b>578</b> | 255430_at | 367  | 1.5 | 2.8 | 2.2 | 290  | 0.9 | 4.1 | 12.7 | AT4G03320 | chloroplast protein import component -related               |
| <b>579</b> | 246993_at | 119  | 0.4 | 1.1 | 2.2 | 124  | 1.0 | 0.8 | 1.5  | AT5G67450 | Cys2/His2-type zinc finger protein 1 (dbj BAA85108.1)       |
| <b>580</b> | 260345_at | 211  | 1.0 | 2.1 | 2.2 | 203  | 1.1 | 1.1 | 3.8  | AT1G69270 | receptor protein kinase -related                            |
| <b>581</b> | 249889_at | 102  | 1.8 | 1.7 | 2.2 | 123  | 1.4 | 0.9 | 3.9  | AT5G22540 | hypothetical protein                                        |
| <b>582</b> | 261395_at | 137  | 1.1 | 1.7 | 2.2 | 107  | 1.5 | 1.5 | 1.9  | AT1G79700 | ovule development protein, putative                         |
| <b>583</b> | 264716_at | 109  | 1.9 | 1.8 | 2.2 | 113  | 0.8 | 0.6 | 2.4  | AT1G70170 | matrix metallo proteinase -related                          |
| <b>584</b> | 262705_at | 339  | 2.7 | 3.0 | 2.2 | 284  | 0.7 | 0.8 | 1.5  | AT1G16260 | wall-associated kinase -related                             |
| <b>585</b> | 251026_at | 76   | 1.4 | 1.4 | 2.2 | 95   | 1.4 | 0.8 | 0.9  | AT5G02200 | hypothetical protein                                        |
| <b>586</b> | 248719_at | 874  | 1.3 | 2.2 | 2.2 | 1126 | 1.0 | 0.9 | 1.3  | AT5G47910 | respiratory burst oxidase protein D (NADPH oxidase) (RbohD) |
| <b>587</b> | 248611_at | 95   | 1.5 | 2.7 | 2.2 | 70   | 1.5 | 1.3 | 4.7  | AT5G49520 | WRKY family transcription factor                            |
| <b>588</b> | 264836_at | 469  | 1.1 | 1.5 | 2.2 | 441  | 1.1 | 0.9 | 1.0  | AT1G03610 | expressed protein                                           |
| <b>589</b> | 257745_at | 2070 | 1.4 | 1.7 | 2.2 | 2158 | 1.2 | 1.0 | 1.2  | AT3G29240 | chloroplast lumen common protein family                     |
| <b>590</b> | 262542_at | 278  | 1.0 | 2.2 | 2.2 | 295  | 0.9 | 1.7 | 6.0  | AT1G34180 | No apical meristem (NAM) protein family                     |
| <b>591</b> | 256922_at | 929  | 1.3 | 2.0 | 2.2 | 822  | 1.2 | 0.9 | 3.7  | AT3G19010 | flavonol synthase family                                    |
| <b>592</b> | 266097_at | 2746 | 2.3 | 2.4 | 2.2 | 1190 | 1.3 | 1.8 | 4.0  | AT2G37970 | expressed protein                                           |
| <b>593</b> | 255880_at | 457  | 1.0 | 2.1 | 2.2 | 368  | 1.0 | 1.0 | 2.8  | AT1G67060 | expressed protein                                           |
| <b>594</b> | 254432_at | 1441 | 1.6 | 2.2 | 2.2 | 995  | 0.9 | 1.8 | 4.7  | AT4G20830 | FAD-linked oxidoreductase family                            |
| <b>595</b> | 245925_at | 255  | 1.0 | 1.3 | 2.2 | 173  | 1.2 | 1.1 | 1.4  | AT5G28770 | bZIP family transcription factor                            |
| <b>596</b> | 258614_at | 640  | 1.1 | 1.7 | 2.2 | 845  | 1.0 | 0.9 | 1.4  | AT3G02770 | dimethylmenaquinone methyltransferase family                |
| <b>597</b> | 267624_at | 648  | 1.2 | 2.1 | 2.2 | 572  | 1.0 | 1.2 | 3.4  | AT2G39660 | protein kinase, putative                                    |
| <b>598</b> | 254487_at | 537  | 1.2 | 1.9 | 2.2 | 691  | 1.0 | 0.8 | 1.0  | AT4G20780 | calcium-binding protein, putative                           |
| <b>599</b> | 252374_at | 280  | 1.0 | 1.7 | 2.2 | 248  | 0.8 | 0.7 | 1.3  | AT3G48100 | response regulator 2 (ATRR2)                                |
| <b>600</b> | 266348_at | 1287 | 1.1 | 2.0 | 2.2 | 1159 | 1.1 | 1.1 | 2.1  | AT2G01450 | mitogen-activated protein kinase (MAPK), putative (MPK17)   |
| <b>601</b> | 253780_at | 427  | 0.9 | 1.5 | 2.1 | 425  | 1.0 | 1.2 | 1.7  | AT4G28400 | protein phosphatase 2C (PP2C), putative                     |
| <b>602</b> | 245074_at | 127  | 1.4 | 1.7 | 2.1 | 134  | 1.2 | 0.8 | 2.2  | AT2G23200 | protein kinase family                                       |
| <b>603</b> | 262165_at | 290  | 0.8 | 2.3 | 2.1 | 301  | 1.2 | 1.0 | 1.2  | AT1G75020 | phospholipid/glycerol acyltransferase family                |
| <b>604</b> | 259561_at | 132  | 2.4 | 4.0 | 2.1 | 107  | 0.8 | 2.1 | 21.0 | AT1G21250 | wall-associated kinase 1                                    |
| <b>605</b> | 267076_at | 1213 | 1.3 | 1.7 | 2.1 | 1425 | 1.1 | 1.3 | 3.0  | AT2G41090 | calmodulin-like calcium binding protein (CaBP-22)           |
| <b>606</b> | 260602_at | 1683 | 1.2 | 2.4 | 2.1 | 1142 | 1.0 | 0.9 | 2.3  | AT1G55920 | serine acetyltransferase                                    |
| <b>607</b> | 261110_at | 425  | 1.0 | 1.8 | 2.1 | 280  | 1.0 | 1.1 | 1.6  | AT1G75440 | ubiquitin-conjugating enzyme 16 (UBC16)                     |
| <b>608</b> | 259927_at | 495  | 1.2 | 1.1 | 2.1 | 159  | 1.0 | 1.2 | 2.0  | AT1G75100 | expressed protein                                           |
| <b>609</b> | 248460_at | 188  | 1.2 | 1.6 | 2.1 | 370  | 1.1 | 1.1 | 0.5  | AT5G50915 | bHLH protein family                                         |
| <b>610</b> | 265149_at | 5976 | 1.1 | 1.4 | 2.1 | 3781 | 1.2 | 1.0 | 0.6  | AT1G51400 | photosystem II 5 KD protein                                 |
| <b>611</b> | 251769_at | 188  | 1.0 | 1.4 | 2.1 | 170  | 1.1 | 0.8 | 3.3  | AT3G55950 | protein kinase family                                       |
| <b>612</b> | 260362_at | 474  | 1.3 | 2.1 | 2.1 | 422  | 0.9 | 1.0 | 3.0  | AT1G70530 | protein kinase -related                                     |
| <b>613</b> | 245251_at | 255  | 0.8 | 1.3 | 2.1 | 244  | 1.1 | 1.2 | 2.4  | AT4G17615 | calcineurin B-like protein 1 (CBL1)                         |

|     |             |      |     |     |     |      |     |     |     |           |                                                       |
|-----|-------------|------|-----|-----|-----|------|-----|-----|-----|-----------|-------------------------------------------------------|
| 614 | 260206_at   | 134  | 1.1 | 2.2 | 2.1 | 205  | 0.9 | 0.6 | 1.7 | AT1G70740 | protein kinase family                                 |
| 615 | 249652_at   | 541  | 1.1 | 1.6 | 2.1 | 538  | 1.0 | 1.1 | 2.8 | AT5G37070 | hypothetical protein                                  |
| 616 | 265672_at   | 98   | 1.1 | 1.8 | 2.1 | 125  | 1.0 | 0.8 | 1.1 | AT2G31980 | cysteine proteinase inhibitor B (cystatin B) -related |
| 617 | 246943_at   | 308  | 1.7 | 2.3 | 2.1 | 191  | 1.1 | 1.0 | 5.2 | AT5G25440 | protein kinase family                                 |
| 618 | 265034_at   | 245  | 1.4 | 2.2 | 2.1 | 295  | 0.9 | 0.9 | 1.1 | AT1G61660 | expressed protein                                     |
| 619 | 257700_at   | 1387 | 1.1 | 2.0 | 2.1 | 1141 | 1.0 | 1.2 | 3.2 | AT3G12740 | membrane protein common family                        |
| 620 | 261394_at   | 84   | 1.3 | 1.6 | 2.1 | 66   | 1.1 | 1.2 | 4.1 | AT1G79680 | WAK-like kinase (WLK)                                 |
| 621 | 261938_at   | 217  | 1.3 | 2.0 | 2.1 | 257  | 0.8 | 1.1 | 2.0 | AT1G22510 | C3HC4-type zinc finger protein family                 |
| 622 | 264645_at   | 247  | 1.1 | 2.1 | 2.1 | 222  | 1.1 | 1.0 | 3.5 | AT1G08940 | expressed protein                                     |
| 623 | 251821_at   | 553  | 1.2 | 2.0 | 2.1 | 499  | 1.0 | 1.0 | 1.8 | AT3G55050 | protein phosphatase 2C - like protein                 |
| 624 | 265472_at   | 797  | 0.8 | 1.5 | 2.1 | 1092 | 1.0 | 1.1 | 1.0 | AT2G15580 | C3HC4-type zinc finger protein family                 |
| 625 | 262832_s_at | 2755 | 1.5 | 1.9 | 2.1 | 2304 | 1.0 | 0.9 | 2.4 | AT1G14870 | expressed protein                                     |
| 626 | 250858_at   | 141  | 1.2 | 2.1 | 2.1 | 158  | 1.1 | 1.4 | 3.0 | AT5G04760 | myb family transcription factor                       |
| 627 | 262183_at   | 190  | 1.1 | 2.1 | 2.1 | 187  | 0.9 | 1.0 | 1.5 | AT1G77890 | expressed protein                                     |
| 628 | 251443_at   | 684  | 1.0 | 1.5 | 2.1 | 734  | 1.2 | 2.6 | 1.9 | AT3G59940 | Kelch repeat containing F-box protein family          |
| 629 | 261445_at   | 814  | 1.1 | 2.0 | 2.1 | 617  | 1.1 | 1.0 | 2.4 | AT1G28380 | expressed protein                                     |
| 630 | 251910_at   | 249  | 0.9 | 1.8 | 2.1 | 209  | 0.9 | 0.5 | 1.5 | AT3G53810 | receptor lectin kinase, putative                      |
| 631 | 259298_at   | 204  | 0.8 | 1.9 | 2.1 | 245  | 1.2 | 0.6 | 0.8 | AT3G05370 | disease resistance protein family                     |
| 632 | 260735_at   | 75   | 0.9 | 2.0 | 2.1 | 113  | 0.7 | 0.7 | 1.1 | AT1G17610 | disease resistance protein -related                   |
| 633 | 249191_at   | 706  | 3.4 | 3.6 | 2.1 | 962  | 1.0 | 0.7 | 0.4 | AT5G42760 | expressed protein                                     |
| 634 | 260831_at   | 436  | 0.9 | 1.0 | 2.1 | 972  | 0.8 | 0.3 | 0.5 | AT1G06830 | glutaredoxin protein family                           |
| 635 | 258349_at   | 775  | 2.4 | 2.6 | 2.1 | 234  | 0.9 | 1.2 | 3.0 | AT3G17609 | bZIP family transcription factor HYH                  |
| 636 | 247426_at   | 488  | 0.8 | 2.2 | 2.1 | 331  | 0.8 | 1.0 | 2.1 | AT5G62570 | calmodulin-binding protein                            |
| 637 | 260048_at   | 328  | 0.8 | 1.3 | 2.1 | 228  | 0.7 | 0.9 | 1.2 | AT1G73750 | expressed protein                                     |
| 638 | 249314_at   | 154  | 1.2 | 1.8 | 2.1 | 168  | 1.1 | 0.8 | 1.8 | AT5G41180 | leucine rich repeat protein kinase, putative          |
| 639 | 264008_at   | 667  | 1.0 | 1.8 | 2.1 | 587  | 0.9 | 1.1 | 1.5 | AT2G21120 | expressed protein                                     |
| 640 | 246440_at   | 530  | 1.2 | 1.4 | 2.1 | 355  | 1.0 | 1.1 | 1.8 | AT5G17650 | glycine/proline-rich protein                          |
| 641 | 248668_at   | 162  | 3.0 | 2.8 | 2.1 | 151  | 1.5 | 3.2 | 5.7 | AT5G48720 | hypothetical protein                                  |
| 642 | 266037_at   | 431  | 0.9 | 2.0 | 2.0 | 490  | 0.9 | 1.1 | 2.4 | AT2G05940 | protein kinase, putative                              |
| 643 | 252976_s_at | 815  | 1.5 | 2.0 | 2.0 | 638  | 0.9 | 1.2 | 2.6 | AT4G38550 | Phospholipase like protein                            |
| 644 | 266290_at   | 445  | 1.5 | 2.7 | 2.0 | 413  | 1.0 | 1.8 | 2.1 | AT2G29490 | glutathione transferase, putative                     |
| 645 | 256233_at   | 457  | 1.2 | 1.9 | 2.0 | 519  | 1.2 | 1.0 | 2.0 | AT3G12360 | ankyrin repeat protein family                         |
| 646 | 265375_at   | 1139 | 1.2 | 1.7 | 2.0 | 922  | 0.9 | 1.1 | 1.9 | AT2G06530 | expressed protein                                     |
| 647 | 262571_at   | 370  | 1.2 | 2.1 | 2.0 | 355  | 0.9 | 0.8 | 2.9 | AT1G15430 | expressed protein                                     |
| 648 | 264756_at   | 316  | 1.5 | 1.9 | 2.0 | 295  | 1.3 | 1.3 | 3.6 | AT1G61370 | receptor protein kinase (IRK1) -related               |
| 649 | 255967_at   | 546  | 1.3 | 2.1 | 2.0 | 518  | 1.1 | 1.1 | 3.1 | AT1G22280 | protein phosphatase 2C (PP2C), putative               |
| 650 | 245854_at   | 790  | 1.1 | 1.7 | 2.0 | 1445 | 1.0 | 1.8 | 3.5 | AT5G13490 | mitochondrial ADP,ATP carrier protein 2               |

|            |           |      |     |     |     |      |     |     |     |           |                                                                     |
|------------|-----------|------|-----|-----|-----|------|-----|-----|-----|-----------|---------------------------------------------------------------------|
| <b>651</b> | 262884_at | 2818 | 0.9 | 1.0 | 2.0 | 1499 | 1.1 | 1.0 | 1.1 | AT1G64720 | membrane related protein CP5 -related                               |
| <b>652</b> | 265276_at | 99   | 0.9 | 1.2 | 2.0 | 49   | 1.9 | 1.9 | 7.3 | AT2G28400 | expressed protein                                                   |
| <b>653</b> | 260419_at | 331  | 1.5 | 2.0 | 2.0 | 260  | 1.0 | 1.1 | 3.0 | AT1G69730 | WAK-like kinase (WLK)                                               |
| <b>654</b> | 263804_at | 375  | 0.8 | 1.8 | 2.0 | 376  | 0.9 | 0.8 | 1.8 | AT2G40270 | protein kinase -related                                             |
| <b>655</b> | 254255_at | 173  | 1.4 | 2.0 | 2.0 | 152  | 0.8 | 0.9 | 3.3 | AT4G23220 | serine/threonine kinase - like protein                              |
| <b>656</b> | 257766_at | 797  | 1.6 | 2.1 | 2.0 | 485  | 1.0 | 1.1 | 2.9 | AT3G23030 | auxin-responsive protein IAA2 (Indoleacetic acid-induced protein 2) |
| <b>657</b> | 252470_at | 137  | 1.3 | 1.8 | 2.0 | 121  | 1.0 | 1.3 | 6.5 | AT3G46930 | protein kinase family                                               |
| <b>658</b> | 255617_at | 235  | 0.9 | 1.4 | 2.0 | 304  | 0.9 | 0.9 | 0.6 | AT4G01330 | protein kinase family                                               |
| <b>659</b> | 253022_at | 539  | 1.6 | 2.1 | 2.0 | 847  | 1.1 | 0.9 | 1.1 | AT4G38060 | expressed protein                                                   |
| <b>660</b> | 262649_at | 182  | 1.1 | 1.7 | 2.0 | 225  | 1.1 | 1.1 | 1.2 | AT1G14040 | hypothetical protein                                                |
| <b>661</b> | 263159_at | 1068 | 1.1 | 1.4 | 2.0 | 945  | 1.1 | 0.9 | 1.3 | AT1G54130 | RSH3 (RelA/SpoT homolog)                                            |

Fold induction for 305-1h is averaged from four independent ATH-1 array hybridizations, all others from two independent array hybridizations. Applied threshold is 2-fold. Annotation June 15, 2003.
