# Supplementary material
Source: PubMed Central journal article supplement (PMC337064)
Supplement: pnas_0308044100_6.pdf [file pnas_0308044100_6.pdf]

**Table 6. Quartz\_1hr\_decrease**

|    | Probe set   | Fold induction             |         |         |            | Fold induction             |         |         |            | Identifier |                                                                |
|----|-------------|----------------------------|---------|---------|------------|----------------------------|---------|---------|------------|------------|----------------------------------------------------------------|
|    |             | Expression level (327, 1h) | 305, 1h | 295, 1h | quartz, 1h | Expression level (327, 1h) | 305, 6h | 295, 6h | quartz, 6h |            |                                                                |
| 1  | 257460_at   | 164                        | 0.5     | 0.2     | 0.1        | 91                         | 0.8     | 1.0     | 0.2        | AT1G75580  | auxin-induced (indole-3-acetic acid induced) protein, putative |
| 2  | 248676_at   | 595                        | 0.3     | 0.1     | 0.1        | 614                        | 1.2     | 1.1     | 0.3        | AT5G48850  | male sterility MS5 family                                      |
| 3  | 260081_at   | 2231                       | 1.0     | 0.5     | 0.1        | 886                        | 0.8     | 0.6     | 0.3        | AT1G78170  | expressed protein                                              |
| 4  | 261177_at   | 1308                       | 0.6     | 0.3     | 0.1        | 1339                       | 1.0     | 1.1     | 0.7        | AT1G04770  | male sterility MS5 family                                      |
| 5  | 255604_at   | 939                        | 0.5     | 0.3     | 0.1        | 1662                       | 1.1     | 0.9     | 0.2        | AT4G01080  | expressed protein                                              |
| 6  | 257421_at   | 184                        | 0.6     | 0.0     | 0.1        | 91                         | 6.9     | 0.4     | 0.2        | AT1G12030  | hypothetical protein                                           |
| 7  | 246884_at   | 1613                       | 0.4     | 0.1     | 0.1        | 959                        | 1.0     | 0.7     | 0.2        | AT5G26220  | expressed protein                                              |
| 8  | 258289_at   | 51                         | 1.0     | 1.4     | 0.1        | 69                         | 1.1     | 0.4     | 0.5        | AT3G23450  | glycine-rich protein                                           |
| 9  | 260978_at   | 736                        | 0.6     | 0.1     | 0.2        | 14                         | 2.6     | 4.1     | 20.5       | AT1G53540  | 17.6 kDa heat shock protein (AA 1-156)                         |
| 10 | 257858_at   | 2238                       | 0.5     | 0.3     | 0.2        | 1139                       | 1.0     | 0.6     | 0.6        | AT3G12920  | expressed protein                                              |
| 11 | 247533_at   | 160                        | 0.8     | 0.5     | 0.2        | 157                        | 1.1     | 0.9     | 0.7        | AT5G61570  | protein kinase family                                          |
| 12 | 262307_at   | 306                        | 0.6     | 0.3     | 0.2        | 34                         | 0.6     | 17.0    | 74.9       | AT1G71000  | DnaJ protein family                                            |
| 13 | 254550_at   | 192                        | 0.4     | 0.3     | 0.2        | 1412                       | 0.7     | 0.1     | 0.0        | AT4G19690  | iron-regulated transporter (IRT1)                              |
| 14 | 247691_at   | 93                         | 0.7     | 0.1     | 0.2        | 18                         | 0.6     | 0.5     | 4.7        | AT5G59720  | heat shock protein family                                      |
| 15 | 260248_at   | 681                        | 0.8     | 0.4     | 0.2        | 130                        | 0.8     | 1.7     | 3.1        | AT1G74310  | heat shock protein 101 (HSP101)                                |
| 16 | 263318_at   | 144                        | 0.6     | 0.1     | 0.2        | 325                        | 1.0     | 1.1     | 0.7        | AT2G24762  | expressed protein                                              |
| 17 | 251292_at   | 195                        | 0.9     | 0.7     | 0.2        | 653                        | 1.0     | 0.6     | 0.2        | AT3G61920  | expressed protein                                              |
| 18 | 254274_at   | 147                        | 0.7     | 0.5     | 0.2        | 217                        | 1.1     | 1.5     | 1.0        | AT4G22770  | DNA binding protein -related                                   |
| 19 | 261684_at   | 2113                       | 0.7     | 0.5     | 0.2        | 4000                       | 1.2     | 0.5     | 0.2        | AT1G47400  | hypothetical protein                                           |
| 20 | 249278_at   | 645                        | 0.9     | 0.4     | 0.2        | 323                        | 1.1     | 0.8     | 0.5        | AT5G41900  | hydrolase, alpha/beta fold family                              |
| 21 | 247600_at   | 758                        | 0.3     | 0.2     | 0.2        | 633                        | 1.0     | 0.8     | 0.4        | AT5G60890  | myb transcription factor homolog (ATR1)                        |
| 22 | 266820_at   | 1082                       | 0.7     | 0.3     | 0.2        | 538                        | 1.0     | 0.6     | 0.2        | AT2G44940  | AP2 domain transcription factor TINY, putative                 |
| 23 | 245341_at   | 310                        | 0.7     | 0.4     | 0.2        | 300                        | 1.0     | 1.0     | 0.5        | AT4G16447  | expressed protein                                              |
| 24 | 266578_at   | 364                        | 1.4     | 0.9     | 0.2        | 714                        | 1.3     | 1.9     | 1.7        | AT2G23910  | cinnamoyl-CoA reductase-related                                |
| 25 | 257890_s_at | 283                        | 0.8     | 0.3     | 0.2        | 246                        | 1.0     | 0.6     | 0.5        | AT3G42570  | peroxidase-related                                             |
| 26 | 266418_at   | 1336                       | 0.7     | 0.4     | 0.2        | 1196                       | 1.1     | 0.7     | 0.3        | AT2G38750  | annexin -related                                               |
| 27 | 250734_at   | 975                        | 0.7     | 0.4     | 0.2        | 837                        | 1.0     | 0.5     | 0.2        | AT5G06270  | B-type cyclin -related                                         |
| 28 | 254693_at   | 423                        | 0.6     | 0.4     | 0.2        | 260                        | 1.3     | 1.0     | 0.5        | AT4G17880  | bHLH protein family                                            |
| 29 | 245783_s_at | 468                        | 0.9     | 0.5     | 0.2        | 463                        | 0.9     | 0.7     | 0.5        | AT1G35180  | expressed protein                                              |
| 30 | 251299_at   | 103                        | 0.6     | 0.3     | 0.2        | 145                        | 1.0     | 0.8     | 0.3        | AT3G61950  | bHLH protein family                                            |
| 31 | 254332_at   | 285                        | 0.9     | 0.4     | 0.2        | 270                        | 1.1     | 0.9     | 0.4        | AT4G22730  | leucine-rich repeat transmembrane protein kinase, putative     |

|    |             |      |     |     |     |      |     |     |      |           |                                                               |
|----|-------------|------|-----|-----|-----|------|-----|-----|------|-----------|---------------------------------------------------------------|
| 32 | 255298_at   | 3997 | 1.1 | 0.8 | 0.2 | 1950 | 1.3 | 0.8 | 0.4  | AT4G04840 | expressed protein                                             |
| 33 | 247478_at   | 3754 | 0.9 | 0.6 | 0.2 | 1249 | 0.9 | 1.2 | 0.5  | AT5G62360 | pectinesterase family                                         |
| 34 | 253578_at   | 528  | 0.9 | 0.4 | 0.2 | 291  | 1.0 | 0.8 | 0.7  | AT4G30340 | expressed protein                                             |
| 35 | 248839_at   | 359  | 0.5 | 0.4 | 0.2 | 326  | 1.1 | 0.7 | 0.2  | AT5G46690 | bHLH protein family                                           |
| 36 | 262811_at   | 389  | 0.6 | 0.4 | 0.2 | 443  | 1.1 | 1.1 | 0.4  | AT1G11700 | expressed protein                                             |
| 37 | 252958_at   | 382  | 1.0 | 0.7 | 0.3 | 301  | 1.2 | 1.4 | 0.7  | AT4G38620 | transcription factor (MYB4) -related                          |
| 38 | 262543_at   | 254  | 0.9 | 0.5 | 0.3 | 259  | 0.8 | 0.7 | 0.4  | AT1G34245 | expressed protein                                             |
| 39 | 248332_at   | 2375 | 0.9 | 0.5 | 0.3 | 475  | 0.9 | 3.9 | 14.1 | AT5G52640 | heat shock protein 81-1 (HSP81-1/heat shock protein 83/HSP83) |
| 40 | 251058_at   | 1006 | 0.8 | 0.5 | 0.3 | 795  | 1.0 | 0.9 | 0.3  | AT5G01790 | expressed protein                                             |
| 41 | 248657_at   | 2151 | 0.7 | 0.3 | 0.3 | 158  | 1.3 | 3.4 | 8.5  | AT5G48570 | peptidylprolyl isomerase                                      |
| 42 | 264147_at   | 234  | 1.1 | 0.8 | 0.3 | 484  | 1.1 | 0.8 | 0.3  | AT1G02205 | CER1 protein                                                  |
| 43 | 257571_at   | 460  | 0.7 | 0.6 | 0.3 | 421  | 0.8 | 0.7 | 0.9  | AT3G16870 | GATA zinc finger protein                                      |
| 44 | 251677_at   | 668  | 0.7 | 0.6 | 0.3 | 2560 | 1.3 | 0.3 | 0.1  | AT3G56980 | bHLH protein family                                           |
| 45 | 261420_at   | 1619 | 1.0 | 0.5 | 0.3 | 1035 | 1.0 | 0.8 | 0.7  | AT1G07720 | beta-ketoacyl-CoA synthase family                             |
| 46 | 247914_at   | 361  | 0.5 | 0.4 | 0.3 | 372  | 1.4 | 0.9 | 0.1  | AT5G57540 | xyloglucan endotransglycosylase, putative                     |
| 47 | 255825_at   | 782  | 0.9 | 0.5 | 0.3 | 784  | 1.0 | 0.7 | 0.3  | AT2G40475 | expressed protein                                             |
| 48 | 253736_at   | 550  | 0.7 | 0.4 | 0.3 | 1043 | 0.9 | 0.5 | 0.1  | AT4G28780 | GDSL-motif lipase/hydrolase protein                           |
| 49 | 246687_at   | 329  | 0.9 | 0.8 | 0.3 | 767  | 1.0 | 0.4 | 0.1  | AT5G33370 | GDSL-motif lipase/hydrolase protein                           |
| 50 | 246986_at   | 1110 | 0.7 | 0.5 | 0.3 | 1427 | 1.0 | 0.8 | 0.3  | AT5G67280 | leucine-rich repeat transmembrane protein kinase, putative    |
| 51 | 246144_at   | 380  | 0.6 | 0.4 | 0.3 | 128  | 1.1 | 1.3 | 1.3  | AT5G20110 | dynein light chain - like protein                             |
| 52 | 267639_at   | 296  | 0.6 | 0.6 | 0.3 | 198  | 1.3 | 1.0 | 0.4  | AT2G42200 | squamosa-promoter binding protein -related                    |
| 53 | 261266_at   | 1308 | 0.7 | 0.5 | 0.3 | 3150 | 1.0 | 1.0 | 0.3  | AT1G26770 | expansin, putative (EXP10)                                    |
| 54 | 251811_at   | 671  | 1.4 | 0.9 | 0.3 | 557  | 1.1 | 1.0 | 0.7  | AT3G54990 | AP2 domain transcription factor, putative                     |
| 55 | 251521_at   | 134  | 0.8 | 1.0 | 0.3 | 148  | 1.0 | 0.7 | 0.3  | AT3G59420 | protein kinase family                                         |
| 56 | 246001_at   | 356  | 0.8 | 0.6 | 0.3 | 301  | 1.3 | 1.3 | 0.6  | AT5G20790 | expressed protein                                             |
| 57 | 257247_at   | 421  | 0.7 | 0.6 | 0.3 | 474  | 1.0 | 0.8 | 0.7  | AT3G24140 | bHLH protein family                                           |
| 58 | 264567_s_at | 2264 | 0.7 | 1.0 | 0.3 | 2129 | 1.0 | 0.6 | 0.2  | AT1G05250 | peroxidase, putative                                          |
| 59 | 246911_at   | 435  | 0.7 | 0.5 | 0.3 | 481  | 1.1 | 0.8 | 0.5  | AT5G25810 | AP2 domain transcription factor TINY                          |
| 60 | 255032_at   | 291  | 0.8 | 0.6 | 0.3 | 195  | 0.9 | 0.7 | 0.6  | AT4G09500 | glycosyltransferase family                                    |
| 61 | 253301_at   | 636  | 0.4 | 0.3 | 0.3 | 340  | 0.4 | 0.3 | 0.8  | AT4G33720 | pathogenesis-related protein, putative                        |
| 62 | 247880_at   | 583  | 0.8 | 0.4 | 0.3 | 494  | 1.2 | 0.6 | 0.3  | AT5G57780 | expressed protein                                             |
| 63 | 267535_at   | 965  | 0.9 | 0.5 | 0.3 | 677  | 0.9 | 0.8 | 0.5  | AT2G41940 | C2H2-type zinc finger protein -related                        |
| 64 | 261949_at   | 1098 | 1.0 | 0.5 | 0.3 | 630  | 1.0 | 0.8 | 0.5  | AT1G64670 | hydrolase, alpha/beta fold family                             |
| 65 | 261975_at   | 664  | 0.9 | 0.4 | 0.3 | 513  | 0.8 | 0.6 | 0.4  | AT1G64640 | plastocyanin-like domain containing protein                   |
| 66 | 248636_at   | 394  | 0.6 | 0.6 | 0.3 | 278  | 1.9 | 0.7 | 0.2  | AT5G49080 | proline-rich protein family                                   |
| 67 | 245244_at   | 1335 | 0.6 | 0.5 | 0.3 | 297  | 0.9 | 0.7 | 1.7  | AT1G44350 | gr1 protein                                                   |
| 68 | 259735_at   | 98   | 0.6 | 0.3 | 0.3 | 199  | 0.9 | 0.6 | 0.4  | AT1G64405 | expressed protein                                             |

|     |             |      |     |     |     |      |     |      |      |           |                                                            |
|-----|-------------|------|-----|-----|-----|------|-----|------|------|-----------|------------------------------------------------------------|
| 69  | 266356_at   | 412  | 0.9 | 0.6 | 0.3 | 304  | 0.9 | 1.0  | 0.5  | AT2G32300 | uclacyanin I                                               |
| 70  | 245078_at   | 442  | 0.8 | 0.5 | 0.3 | 699  | 0.9 | 1.1  | 0.7  | AT2G23340 | AP2 domain transcription factor, putative                  |
| 71  | 250682_x_at | 2374 | 0.6 | 0.6 | 0.3 | 2253 | 1.1 | 0.5  | 0.1  | AT5G06630 | proline-rich protein family                                |
| 72  | 256352_at   | 727  | 0.7 | 0.6 | 0.3 | 543  | 1.2 | 0.8  | 0.2  | AT1G54970 | proline-rich protein family                                |
| 73  | 261838_at   | 891  | 0.8 | 0.5 | 0.3 | 318  | 0.9 | 1.1  | 1.4  | AT1G16030 | heat shock protein hsp70b                                  |
| 74  | 247147_at   | 1719 | 1.0 | 0.8 | 0.3 | 1517 | 1.0 | 0.9  | 1.0  | AT5G65630 | bromodomain-containing protein                             |
| 75  | 245750_at   | 4848 | 0.7 | 0.4 | 0.3 | 4214 | 1.0 | 0.8  | 0.5  | AT1G51060 | histone H2A, putative                                      |
| 76  | 250296_at   | 896  | 0.5 | 0.1 | 0.3 | 21   | 7.3 | 11.4 | 78.0 | AT5G12020 | class II heat shock protein                                |
| 77  | 260058_at   | 914  | 1.4 | 0.7 | 0.3 | 865  | 1.1 | 0.9  | 0.6  | AT1G78100 | F-box protein family                                       |
| 78  | 256245_at   | 4032 | 0.9 | 0.6 | 0.3 | 946  | 1.0 | 4.8  | 9.8  | AT3G12580 | heat shock protein hsp70                                   |
| 79  | 252340_at   | 230  | 0.9 | 0.8 | 0.3 | 277  | 1.1 | 0.4  | 0.7  | AT3G48920 | myb family transcription factor                            |
| 80  | 250189_at   | 494  | 0.9 | 0.5 | 0.3 | 337  | 1.1 | 0.9  | 0.5  | AT5G14410 | expressed protein                                          |
| 81  | 251060_at   | 594  | 0.6 | 0.5 | 0.3 | 367  | 1.0 | 0.8  | 0.6  | AT5G01820 | CBL-interacting protein kinase 14                          |
| 82  | 256598_at   | 808  | 1.3 | 0.6 | 0.3 | 525  | 1.0 | 1.6  | 2.8  | AT3G30180 | cytochrome p450, putative                                  |
| 83  | 255690_at   | 3113 | 0.9 | 0.5 | 0.3 | 2831 | 0.9 | 0.9  | 0.8  | AT4G00360 | cytochrome p450, putative                                  |
| 84  | 255662_at   | 368  | 1.0 | 0.5 | 0.3 | 340  | 1.1 | 0.6  | 0.2  | AT4G00410 | expressed protein                                          |
| 85  | 249383_at   | 380  | 0.7 | 0.4 | 0.3 | 130  | 1.1 | 0.4  | 0.4  | AT5G39860 | bHLH protein                                               |
| 86  | 254914_at   | 965  | 0.9 | 0.7 | 0.3 | 1454 | 1.1 | 1.1  | 1.1  | AT4G11290 | peroxidase, putative                                       |
| 87  | 267516_at   | 1318 | 1.5 | 0.9 | 0.3 | 429  | 1.2 | 1.8  | 2.0  | AT2G30520 | expressed protein                                          |
| 88  | 251025_at   | 333  | 0.6 | 0.5 | 0.3 | 169  | 1.1 | 0.7  | 0.4  | AT5G02190 | expressed protein                                          |
| 89  | 246519_at   | 1856 | 0.9 | 0.6 | 0.3 | 1107 | 0.9 | 0.5  | 0.2  | AT5G15780 | proline-rich protein                                       |
| 90  | 246516_at   | 730  | 0.7 | 0.5 | 0.3 | 828  | 1.0 | 1.0  | 0.6  | AT5G15740 | expressed protein                                          |
| 91  | 259531_at   | 276  | 0.9 | 0.5 | 0.3 | 171  | 1.2 | 1.2  | 0.6  | AT1G12460 | leucine-rich repeat transmembrane protein kinase, putative |
| 92  | 245612_at   | 2807 | 0.8 | 0.5 | 0.3 | 2519 | 0.9 | 0.8  | 0.6  | AT4G14440 | enoyl-CoA hydratase/isomerase family                       |
| 93  | 259786_at   | 2713 | 0.8 | 0.6 | 0.3 | 3381 | 0.9 | 0.7  | 0.3  | AT1G29660 | GDSL-motif lipase/hydrolase protein                        |
| 94  | 262598_at   | 1022 | 0.7 | 0.5 | 0.3 | 1611 | 1.1 | 0.7  | 0.2  | AT1G15260 | expressed protein                                          |
| 95  | 264347_at   | 302  | 0.8 | 0.7 | 0.3 | 234  | 1.2 | 0.6  | 0.3  | AT1G12040 | leucine-rich repeat extensin family                        |
| 96  | 246097_at   | 1524 | 0.9 | 0.7 | 0.3 | 1229 | 1.0 | 0.6  | 0.5  | AT5G20270 | expressed protein                                          |
| 97  | 265029_at   | 488  | 0.8 | 0.5 | 0.3 | 620  | 0.8 | 0.7  | 0.5  | AT1G24625 | zinc finger protein 7, ZFP7                                |
| 98  | 261570_at   | 4531 | 1.0 | 0.7 | 0.3 | 1973 | 1.0 | 0.8  | 0.7  | AT1G01120 | fatty acid elongase 3-ketoacyl-CoA synthase 1 (KCS1)       |
| 99  | 252272_at   | 1935 | 0.8 | 0.5 | 0.3 | 1059 | 0.9 | 0.6  | 0.4  | AT3G49670 | leucine-rich repeat transmembrane protein kinase, putative |
| 100 | 246952_at   | 174  | 1.0 | 0.6 | 0.3 | 221  | 1.0 | 0.8  | 0.5  | AT5G04820 | expressed protein                                          |
| 101 | 253215_at   | 2703 | 0.8 | 0.6 | 0.3 | 5208 | 0.9 | 1.0  | 0.6  | AT4G34950 | expressed protein                                          |
| 102 | 247871_at   | 383  | 0.6 | 0.6 | 0.3 | 384  | 1.3 | 0.6  | 0.1  | AT5G57530 | xyloglucan endotransglycosylase, putative                  |
| 103 | 264057_at   | 997  | 1.0 | 0.8 | 0.3 | 547  | 1.1 | 1.2  | 0.7  | AT2G28550 | AP2 domain transcription factor RAP2.7                     |
| 104 | 251169_at   | 431  | 0.6 | 0.4 | 0.3 | 461  | 1.1 | 1.1  | 0.6  | AT3G63210 | senescence-associated protein SAG102                       |
| 105 | 265103_at   | 134  | 1.1 | 0.5 | 0.3 | 125  | 1.2 | 0.9  | 0.5  | AT1G31070 | UDP-N-acetylglucosamine pyrophosphorylase-related protein  |

|            |             |      |     |     |     |      |     |     |     |           |                                                                             |
|------------|-------------|------|-----|-----|-----|------|-----|-----|-----|-----------|-----------------------------------------------------------------------------|
| <b>106</b> | 246844_at   | 134  | 1.8 | 0.9 | 0.3 | 196  | 0.9 | 0.7 | 0.5 | AT5G26660 | myb transcription factor (ATMYB4)                                           |
| <b>107</b> | 257334_at   | 279  | 0.5 | 0.4 | 0.4 | 344  | 1.1 | 1.1 | 0.7 | ATMG01370 | ORF111D                                                                     |
| <b>108</b> | 249035_at   | 1236 | 0.9 | 0.4 | 0.4 | 212  | 1.2 | 1.2 | 1.2 | AT5G44190 | myb family transcription factor                                             |
| <b>109</b> | 264415_at   | 180  | 1.0 | 0.4 | 0.4 | 57   | 1.3 | 1.6 | 0.9 | AT1G43160 | AP2 domain transcription factor RAP2.6                                      |
| <b>110</b> | 251785_at   | 1138 | 0.9 | 0.6 | 0.4 | 810  | 1.0 | 0.8 | 0.5 | AT3G55130 | ABC transporter family protein                                              |
| <b>111</b> | 252833_at   | 723  | 0.6 | 0.7 | 0.4 | 548  | 1.3 | 0.6 | 0.2 | AT4G40090 | arabinogalactan-protein (AGP3)                                              |
| <b>112</b> | 264014_at   | 970  | 0.8 | 0.6 | 0.4 | 1727 | 1.2 | 0.9 | 0.1 | AT2G21210 | auxin-induced (indole-3-acetic acid induced) protein, putative              |
| <b>113</b> | 264091_at   | 430  | 0.8 | 0.5 | 0.4 | 433  | 0.8 | 1.2 | 0.9 | AT1G79110 | expressed protein                                                           |
| <b>114</b> | 263552_x_at | 2547 | 0.6 | 0.6 | 0.4 | 2360 | 1.1 | 0.5 | 0.2 | AT2G24980 | proline-rich protein family                                                 |
| <b>115</b> | 266912_at   | 182  | 0.4 | 0.3 | 0.4 | 174  | 1.3 | 0.9 | 0.2 | AT2G45900 | expressed protein                                                           |
| <b>116</b> | 246071_at   | 2850 | 1.0 | 0.7 | 0.4 | 2130 | 0.9 | 0.9 | 0.8 | AT5G20150 | ids4-related protein                                                        |
| <b>117</b> | 266419_at   | 262  | 0.8 | 0.7 | 0.4 | 250  | 1.0 | 0.5 | 0.2 | AT2G38760 | annexin -related                                                            |
| <b>118</b> | 267158_at   | 1064 | 0.6 | 0.5 | 0.4 | 682  | 1.0 | 0.6 | 0.2 | AT2G37640 | expansin, putative (EXP3)                                                   |
| <b>119</b> | 264006_at   | 2630 | 0.8 | 0.6 | 0.4 | 1505 | 1.2 | 1.2 | 1.9 | AT2G22430 | homeobox-leucine zipper protein ATHB-6 (HD-Zip transcription factor Athb-6) |
| <b>120</b> | 267019_at   | 832  | 0.8 | 0.6 | 0.4 | 415  | 1.1 | 1.3 | 0.8 | AT2G39130 | amino acid transporter family                                               |
| <b>121</b> | 249073_at   | 5265 | 0.9 | 0.5 | 0.4 | 2900 | 0.8 | 0.6 | 0.3 | AT5G44020 | vegetative storage protein-related                                          |
| <b>122</b> | 253515_at   | 275  | 1.0 | 0.6 | 0.4 | 250  | 0.7 | 0.8 | 0.4 | AT4G31320 | auxin-induced (indole-3-acetic acid induced) protein, putative (SAUR_c)     |
| <b>123</b> | 265359_at   | 507  | 1.2 | 0.7 | 0.4 | 167  | 1.1 | 1.1 | 2.2 | AT2G16720 | myb DNA-binding protein                                                     |
| <b>124</b> | 247461_at   | 238  | 1.0 | 0.5 | 0.4 | 149  | 1.2 | 0.9 | 0.5 | AT5G62100 | BAG domain containing protein                                               |
| <b>125</b> | 259660_at   | 4064 | 0.8 | 0.6 | 0.4 | 4621 | 1.0 | 0.7 | 0.3 | AT1G55260 | protease inhibitor/seed storage/lipid transfer protein (LTP) family         |
| <b>126</b> | 246991_at   | 1159 | 0.7 | 0.6 | 0.4 | 1077 | 1.0 | 0.5 | 0.1 | AT5G67400 | peroxidase, putative                                                        |
| <b>127</b> | 255284_at   | 1491 | 0.7 | 0.4 | 0.4 | 2551 | 1.1 | 1.0 | 0.8 | AT4G04610 | 5'-adenylylsulfate reductase                                                |
| <b>128</b> | 247191_at   | 819  | 1.0 | 0.6 | 0.4 | 655  | 0.9 | 0.7 | 0.6 | AT5G65310 | homeobox-leucine zipper protein ATHB-5 (HD-Zip protein ATHB-5)              |
| <b>129</b> | 249986_at   | 347  | 1.0 | 0.5 | 0.4 | 455  | 0.9 | 0.7 | 0.3 | AT5G18460 | expressed protein                                                           |
| <b>130</b> | 259813_at   | 259  | 0.8 | 0.5 | 0.4 | 919  | 0.7 | 0.4 | 0.1 | AT1G49860 | glutathione transferase, putative                                           |
| <b>131</b> | 255438_at   | 679  | 0.8 | 0.7 | 0.4 | 706  | 1.1 | 0.7 | 0.4 | AT4G03070 | 2-oxoglutarate-dependent dioxygenase (AOP1.2)                               |
| <b>132</b> | 251174_at   | 881  | 0.7 | 0.4 | 0.4 | 1039 | 1.2 | 1.0 | 0.5 | AT3G63200 | patatin-related                                                             |
| <b>133</b> | 259736_at   | 2091 | 0.8 | 0.6 | 0.4 | 3874 | 1.0 | 0.8 | 0.2 | AT1G64390 | glycosyl hydrolase family 9 (endo-1,4-beta-glucanase)                       |
| <b>134</b> | 258003_at   | 664  | 0.8 | 0.5 | 0.4 | 1033 | 1.0 | 0.6 | 0.1 | AT3G29030 | expansin, putative (EXP5)                                                   |
| <b>135</b> | 261247_at   | 896  | 0.9 | 0.6 | 0.4 | 502  | 0.8 | 1.1 | 1.9 | AT1G20070 | expressed protein                                                           |
| <b>136</b> | 265872_at   | 1260 | 0.9 | 0.6 | 0.4 | 1607 | 1.1 | 1.1 | 1.5 | AT2G01670 | MutT/nudix family protein                                                   |
| <b>137</b> | 266809_at   | 685  | 0.7 | 0.5 | 0.4 | 417  | 1.2 | 0.9 | 0.6 | AT2G29970 | expressed protein                                                           |
| <b>138</b> | 261226_at   | 1891 | 0.5 | 0.3 | 0.4 | 1196 | 1.1 | 0.3 | 0.3 | AT1G20190 | expansin, putative (EXP11)                                                  |
| <b>139</b> | 250613_at   | 412  | 0.5 | 0.2 | 0.4 | 424  | 1.2 | 1.1 | 0.5 | AT5G07240 | expressed protein                                                           |

|     |           |      |     |     |     |      |     |     |      |           |                                                                             |
|-----|-----------|------|-----|-----|-----|------|-----|-----|------|-----------|-----------------------------------------------------------------------------|
| 140 | 256062_at | 594  | 0.9 | 0.5 | 0.4 | 500  | 0.9 | 1.1 | 1.7  | AT1G07090 | expressed protein                                                           |
| 141 | 253817_at | 497  | 0.8 | 0.8 | 0.4 | 497  | 0.9 | 0.8 | 0.6  | AT4G28310 | expressed protein                                                           |
| 142 | 255294_at | 170  | 1.1 | 0.7 | 0.4 | 362  | 1.2 | 0.9 | 0.4  | AT4G04750 | sugar transporter family                                                    |
| 143 | 260830_at | 2269 | 0.6 | 0.4 | 0.4 | 1809 | 1.1 | 0.9 | 0.9  | AT1G06760 | histone H1, putative                                                        |
| 144 | 257876_at | 220  | 1.5 | 0.8 | 0.4 | 255  | 1.0 | 0.9 | 0.6  | AT3G17130 | hypothetical protein                                                        |
| 145 | 250424_at | 1211 | 0.7 | 0.5 | 0.4 | 1073 | 1.0 | 0.9 | 0.9  | AT5G10550 | bromodomain-containing protein                                              |
| 146 | 253580_at | 345  | 0.8 | 0.6 | 0.4 | 233  | 1.2 | 0.9 | 0.6  | AT4G30400 | zinc finger (RING finger) protein family                                    |
| 147 | 253317_at | 439  | 0.5 | 0.4 | 0.4 | 823  | 1.1 | 0.8 | 0.3  | AT4G33960 | expressed protein                                                           |
| 148 | 262162_at | 2179 | 0.9 | 0.5 | 0.4 | 5624 | 1.0 | 0.9 | 0.5  | AT1G78020 | senescence-associated protein -related                                      |
| 149 | 250304_at | 1864 | 0.8 | 0.4 | 0.4 | 770  | 1.1 | 1.1 | 0.6  | AT5G12110 | elongation factor 1B alpha-subunit (emb CAB64729.1)                         |
| 150 | 259773_at | 187  | 0.6 | 0.3 | 0.4 | 86   | 0.7 | 0.2 | 0.0  | AT1G29500 | auxin-induced (indole-3-acetic acid induced) protein, putative              |
| 151 | 246860_at | 607  | 0.6 | 0.7 | 0.4 | 787  | 1.2 | 0.8 | 0.4  | AT5G25840 | expressed protein                                                           |
| 152 | 259528_at | 213  | 0.6 | 0.3 | 0.4 | 250  | 1.1 | 1.0 | 0.4  | AT1G12330 | expressed protein                                                           |
| 153 | 265272_at | 259  | 0.6 | 0.6 | 0.4 | 214  | 1.1 | 1.3 | 1.2  | AT2G28350 | auxin response transcription factor                                         |
| 154 | 266460_at | 835  | 0.8 | 0.6 | 0.4 | 486  | 1.0 | 0.8 | 0.3  | AT2G47930 | proline-rich protein family                                                 |
| 155 | 262682_at | 910  | 1.1 | 0.6 | 0.4 | 1879 | 0.8 | 0.6 | 0.3  | AT1G75900 | family II extracellular lipase 3 (EXL3)                                     |
| 156 | 255577_at | 202  | 0.9 | 0.6 | 0.4 | 121  | 1.1 | 0.6 | 0.5  | AT4G01410 | harpin-induced protein 1 family (HIN1)                                      |
| 157 | 255403_at | 1118 | 1.4 | 0.5 | 0.4 | 318  | 1.1 | 1.4 | 1.4  | AT4G03400 | GH3 protein -related                                                        |
| 158 | 250351_at | 1098 | 0.5 | 0.2 | 0.4 | 26   | 1.5 | 3.2 | 40.6 | AT5G12030 | heat shock protein 17.6A                                                    |
| 159 | 245007_at | 6407 | 0.9 | 0.6 | 0.4 | 4724 | 1.1 | 0.7 | 0.3  | ATCG00350 | photosystem I P700 apoprotein A1 (PSAA)                                     |
| 160 | 254370_at | 1296 | 0.9 | 0.6 | 0.4 | 793  | 1.2 | 0.7 | 0.5  | AT4G21750 | L1 specific homeobox gene ATML1/ovule-specific homeobox protein A20 (ATML1) |
| 161 | 266294_at | 1771 | 0.8 | 0.4 | 0.4 | 171  | 1.0 | 2.9 | 6.6  | AT2G29500 | small heat shock protein -related                                           |
| 162 | 249410_at | 512  | 0.8 | 0.5 | 0.4 | 388  | 0.9 | 0.6 | 0.4  | AT5G40380 | receptor-related protein kinase                                             |
| 163 | 249411_at | 1857 | 1.2 | 0.8 | 0.4 | 1535 | 1.0 | 1.0 | 1.3  | AT5G40390 | glycosyl hydrolase family 36                                                |
| 164 | 246652_at | 711  | 0.5 | 0.7 | 0.4 | 467  | 1.6 | 0.7 | 0.1  | AT5G35190 | proline-rich protein family                                                 |
| 165 | 261804_at | 418  | 1.0 | 0.6 | 0.4 | 976  | 1.2 | 1.1 | 0.2  | AT1G30530 | glycosyltransferase family                                                  |
| 166 | 252317_at | 847  | 0.8 | 0.5 | 0.4 | 621  | 1.0 | 0.9 | 0.5  | AT3G48720 | transferase family                                                          |
| 167 | 264130_at | 1185 | 0.9 | 0.6 | 0.4 | 702  | 0.9 | 0.8 | 0.9  | AT1G79160 | expressed protein                                                           |
| 168 | 255786_at | 1416 | 0.7 | 0.8 | 0.4 | 945  | 0.9 | 0.6 | 0.2  | AT1G19670 | coronatine-induced protein 1 (CORI1)                                        |
| 169 | 255277_at | 1224 | 0.8 | 0.6 | 0.4 | 1297 | 1.0 | 0.8 | 0.3  | AT4G04890 | homeodomain protein protodermal factor2 (PDF2)                              |
| 170 | 248921_at | 1682 | 0.9 | 0.6 | 0.4 | 1616 | 1.0 | 0.7 | 0.6  | AT5G45950 | GDSL-motif lipase/hydrolase protein                                         |
| 171 | 261407_at | 417  | 1.8 | 1.1 | 0.4 | 245  | 1.2 | 0.7 | 0.4  | AT1G18810 | expressed protein                                                           |
| 172 | 266322_at | 635  | 0.7 | 0.5 | 0.4 | 597  | 1.1 | 0.9 | 0.5  | AT2G46690 | auxin-induced (indole-3-acetic acid induced) protein family                 |
| 173 | 255149_at | 516  | 0.7 | 0.7 | 0.4 | 403  | 1.3 | 1.2 | 0.8  | AT4G08150 | KNAT1 homeobox-related protein                                              |
| 174 | 260363_at | 445  | 0.7 | 0.5 | 0.4 | 330  | 1.1 | 0.9 | 0.5  | AT1G70550 | expressed protein                                                           |
| 175 | 248191_at | 444  | 0.8 | 0.5 | 0.4 | 239  | 1.1 | 1.3 | 0.9  | AT5G54130 | calcium-binding EF-hand family protein                                      |
| 176 | 261819_at | 503  | 0.9 | 0.8 | 0.4 | 444  | 1.1 | 1.0 | 1.1  | AT1G11410 | S-locus protein kinase, putative                                            |

|            |             |      |     |     |     |      |     |     |     |           |                                                                               |
|------------|-------------|------|-----|-----|-----|------|-----|-----|-----|-----------|-------------------------------------------------------------------------------|
| <b>177</b> | 253227_at   | 254  | 0.7 | 0.6 | 0.4 | 411  | 1.1 | 0.8 | 0.5 | AT4G35030 | protein kinase - like                                                         |
| <b>178</b> | 249209_at   | 242  | 1.2 | 0.8 | 0.4 | 234  | 0.9 | 0.8 | 0.8 | AT5G42620 | major surface glyco protein-related                                           |
| <b>179</b> | 265880_at   | 334  | 0.6 | 0.4 | 0.4 | 248  | 0.9 | 1.0 | 0.6 | AT2G42300 | bHLH protein family                                                           |
| <b>180</b> | 251272_at   | 216  | 0.8 | 0.5 | 0.4 | 133  | 1.1 | 1.1 | 0.8 | AT3G61890 | homeobox-leucine zipper protein ATHB-12 (HD-Zip transcription factor Athb-12) |
| <b>181</b> | 256880_at   | 978  | 0.7 | 0.6 | 0.4 | 1355 | 1.2 | 0.9 | 0.5 | AT3G26450 | major latex protein (MLP)-related                                             |
| <b>182</b> | 246483_at   | 455  | 0.6 | 0.5 | 0.4 | 419  | 0.9 | 0.8 | 0.4 | AT5G16000 | receptor protein kinase-related protein                                       |
| <b>183</b> | 256060_at   | 537  | 0.9 | 0.6 | 0.4 | 1104 | 1.0 | 0.9 | 0.4 | AT1G07050 | expressed protein                                                             |
| <b>184</b> | 245304_at   | 1101 | 1.2 | 0.8 | 0.4 | 890  | 1.1 | 0.9 | 1.0 | AT4G15630 | expressed integral membrane protein common family                             |
| <b>185</b> | 264517_at   | 238  | 1.1 | 0.6 | 0.4 | 158  | 1.3 | 1.2 | 1.2 | AT1G10120 | expressed protein                                                             |
| <b>186</b> | 253582_at   | 1481 | 0.8 | 0.7 | 0.4 | 1385 | 1.1 | 0.7 | 0.4 | AT4G30670 | expressed protein                                                             |
| <b>187</b> | 248046_at   | 1067 | 0.9 | 0.6 | 0.4 | 1086 | 0.9 | 0.9 | 0.4 | AT5G56040 | leucine rich repeat protein kinase, putative                                  |
| <b>188</b> | 245874_at   | 1049 | 0.7 | 0.8 | 0.4 | 1481 | 0.8 | 0.8 | 0.5 | AT1G26250 | proline-rich extensin, putative                                               |
| <b>189</b> | 267425_at   | 213  | 0.9 | 0.7 | 0.4 | 206  | 0.9 | 0.8 | 0.5 | AT2G34810 | FAD-linked oxidoreductase family                                              |
| <b>190</b> | 250828_at   | 395  | 0.7 | 0.6 | 0.4 | 669  | 1.1 | 0.5 | 0.2 | AT5G05250 | expressed protein                                                             |
| <b>191</b> | 258890_at   | 284  | 1.0 | 0.6 | 0.4 | 228  | 1.3 | 0.9 | 0.8 | AT3G05690 | transcription factor -related                                                 |
| <b>192</b> | 252427_at   | 917  | 0.8 | 0.7 | 0.4 | 769  | 1.1 | 0.6 | 0.4 | AT3G47640 | bHLH protein family                                                           |
| <b>193</b> | 264795_at   | 206  | 1.4 | 0.7 | 0.4 | 151  | 1.0 | 1.2 | 1.0 | AT1G08680 | ARF GAP-like zinc finger-containing protein (ZIGA4)                           |
| <b>194</b> | 264745_at   | 2246 | 0.8 | 0.4 | 0.4 | 2164 | 0.9 | 1.0 | 0.7 | AT1G62180 | phosphoadenylyl-sulfate reductase (thioredoxin) (PAPS reductase), putative    |
| <b>195</b> | 250683_x_at | 1153 | 0.8 | 0.6 | 0.4 | 1173 | 1.2 | 0.5 | 0.2 | AT5G06640 | proline-rich protein family                                                   |
| <b>196</b> | 253741_at   | 189  | 0.7 | 0.6 | 0.4 | 156  | 1.5 | 1.0 | 1.0 | AT4G28890 | C3HC4-type zinc finger protein family                                         |
| <b>197</b> | 261538_at   | 228  | 1.1 | 0.6 | 0.4 | 156  | 1.1 | 0.6 | 0.5 | AT1G01830 | armadillo repeat containing protein                                           |
| <b>198</b> | 248393_at   | 1379 | 1.0 | 0.7 | 0.4 | 1152 | 1.1 | 1.0 | 0.9 | AT5G52060 | BAG domain containing protein                                                 |
| <b>199</b> | 250261_at   | 1113 | 0.9 | 0.6 | 0.4 | 983  | 0.9 | 0.7 | 0.4 | AT5G13400 | peptide transporter - like protein                                            |
| <b>200</b> | 246930_at   | 251  | 1.0 | 0.4 | 0.4 | 303  | 1.1 | 1.4 | 1.3 | AT5G25220 | KNAT3 homeodomain protein                                                     |
| <b>201</b> | 260367_at   | 646  | 0.9 | 0.8 | 0.4 | 545  | 0.9 | 1.0 | 1.0 | AT1G69760 | expressed protein                                                             |
| <b>202</b> | 253050_at   | 633  | 0.9 | 0.6 | 0.4 | 538  | 0.8 | 0.7 | 0.4 | AT4G37450 | arabinogalactan-protein (AGP18)                                               |
| <b>203</b> | 261308_at   | 778  | 0.8 | 0.5 | 0.4 | 738  | 1.0 | 0.6 | 0.4 | AT1G48480 | leucine-rich repeat transmembrane protein kinase, putative                    |
| <b>204</b> | 263412_at   | 1005 | 1.1 | 0.7 | 0.4 | 643  | 1.0 | 1.0 | 1.0 | AT2G28720 | histone H2B, putative                                                         |
| <b>205</b> | 255889_at   | 4329 | 1.0 | 0.7 | 0.4 | 2802 | 1.0 | 1.1 | 1.0 | AT1G17840 | ABC transporter family protein                                                |
| <b>206</b> | 254041_at   | 814  | 1.3 | 0.9 | 0.4 | 537  | 1.1 | 1.0 | 0.6 | AT4G25830 | expressed integral membrane protein common family                             |
| <b>207</b> | 250936_at   | 580  | 1.0 | 0.7 | 0.4 | 228  | 1.1 | 0.9 | 0.4 | AT5G03120 | expressed protein                                                             |
| <b>208</b> | 250569_at   | 1099 | 1.1 | 0.5 | 0.4 | 541  | 1.0 | 0.9 | 0.7 | AT5G08130 | bHLH protein family                                                           |
| <b>209</b> | 255891_at   | 404  | 1.1 | 0.5 | 0.4 | 116  | 1.0 | 0.8 | 1.2 | AT1G17870 | expressed protein                                                             |
| <b>210</b> | 250793_at   | 652  | 0.9 | 0.7 | 0.4 | 236  | 0.8 | 1.1 | 1.7 | AT5G05600 | oxidoreductase, 2OG-Fe(II) oxygenase family                                   |
| <b>211</b> | 260234_at   | 631  | 1.2 | 0.9 | 0.4 | 979  | 1.0 | 1.1 | 1.0 | AT1G74460 | GDSL-motif lipase/hydrolase protein                                           |
| <b>212</b> | 246231_at   | 505  | 0.8 | 0.6 | 0.4 | 785  | 1.0 | 0.9 | 0.3 | AT4G37080 | expressed protein                                                             |

|     |             |      |     |     |     |      |     |     |     |           |                                                                            |
|-----|-------------|------|-----|-----|-----|------|-----|-----|-----|-----------|----------------------------------------------------------------------------|
| 213 | 252414_at   | 1489 | 1.0 | 0.6 | 0.4 | 1078 | 0.9 | 1.0 | 0.9 | AT3G47420 | glycerol-3-phosphate transporter (glycerol 3-phosphate permease), putative |
| 214 | 259704_at   | 298  | 1.1 | 0.9 | 0.4 | 292  | 1.0 | 1.7 | 3.6 | AT1G77680 | 3'-5' exoribonuclease -related                                             |
| 215 | 250968_at   | 444  | 0.7 | 0.4 | 0.4 | 551  | 1.0 | 0.4 | 0.1 | AT5G02890 | transferase family                                                         |
| 216 | 247385_at   | 376  | 1.2 | 0.7 | 0.4 | 641  | 1.0 | 1.1 | 0.4 | AT5G63420 | hydrolase family                                                           |
| 217 | 259391_s_at | 544  | 0.9 | 0.6 | 0.4 | 545  | 0.9 | 0.5 | 0.2 | AT1G06350 | fatty acid desaturase family protein                                       |
| 218 | 266372_at   | 152  | 0.7 | 1.0 | 0.4 | 229  | 1.3 | 0.8 | 0.3 | AT2G41310 | two-component response regulator 3 protein -related                        |
| 219 | 255028_at   | 192  | 0.6 | 0.4 | 0.4 | 325  | 1.2 | 0.9 | 0.4 | AT4G09890 | expressed protein                                                          |
| 220 | 262236_at   | 309  | 0.5 | 0.3 | 0.4 | 238  | 0.8 | 0.5 | 0.2 | AT1G48330 | expressed protein                                                          |
| 221 | 258421_at   | 432  | 0.8 | 0.7 | 0.4 | 424  | 1.1 | 0.7 | 0.2 | AT3G16690 | nodulin MtN3 family protein                                                |
| 222 | 250582_at   | 809  | 1.0 | 0.7 | 0.4 | 668  | 1.2 | 1.1 | 0.7 | AT5G07580 | ethylene responsive element binding factor family (EREBP)                  |
| 223 | 247874_at   | 871  | 0.7 | 0.7 | 0.4 | 905  | 1.1 | 1.0 | 1.2 | AT5G57710 | 101 kDa heat shock protein; HSP101-related protein                         |
| 224 | 246135_at   | 702  | 1.0 | 0.7 | 0.4 | 1003 | 1.0 | 0.6 | 0.4 | AT5G20885 | C3HC4-type zinc finger protein family                                      |
| 225 | 263998_at   | 582  | 1.0 | 0.8 | 0.4 | 923  | 1.1 | 1.2 | 1.1 | AT2G22510 | proline-rich protein family                                                |
| 226 | 264479_at   | 431  | 1.1 | 0.9 | 0.4 | 356  | 1.2 | 1.1 | 1.1 | AT1G77280 | hypothetical protein                                                       |
| 227 | 246149_at   | 1013 | 0.6 | 0.5 | 0.4 | 957  | 0.8 | 0.4 | 0.2 | AT5G19890 | peroxidase, putative                                                       |
| 228 | 250892_at   | 1093 | 0.7 | 0.6 | 0.4 | 884  | 1.1 | 0.9 | 0.4 | AT5G03760 | glycosyltransferase family 2                                               |
| 229 | 260753_at   | 442  | 0.6 | 0.5 | 0.4 | 241  | 1.1 | 1.0 | 0.6 | AT1G49230 | RING-H2 finger protein RHA3a -related                                      |
| 230 | 259430_at   | 2147 | 0.8 | 0.6 | 0.4 | 2097 | 1.0 | 1.0 | 1.0 | AT1G01610 | expressed protein                                                          |
| 231 | 260051_at   | 785  | 1.1 | 0.8 | 0.4 | 535  | 1.0 | 0.8 | 0.7 | AT1G78210 | hydrolase, alpha/beta fold family                                          |
| 232 | 251796_at   | 3778 | 0.9 | 0.7 | 0.4 | 3125 | 0.9 | 0.7 | 0.4 | AT3G55360 | 3-oxo-5-alpha-steroid 4-dehydrogenase (steroid 5-alpha-reductase) family   |
| 233 | 258217_at   | 441  | 0.9 | 0.6 | 0.4 | 1030 | 1.1 | 0.7 | 0.2 | AT3G18000 | phosphoethanolamine N-methyltransferase, putative                          |
| 234 | 260267_at   | 3295 | 0.9 | 0.7 | 0.4 | 2976 | 1.1 | 1.0 | 0.6 | AT1G68530 | very-long-chain fatty acid condensing enzyme (CUT1)                        |
| 235 | 265967_at   | 983  | 0.8 | 0.6 | 0.4 | 1017 | 0.9 | 0.7 | 0.3 | AT2G37450 | nodulin MtN21 family protein                                               |
| 236 | 256321_at   | 1162 | 0.9 | 0.8 | 0.4 | 1073 | 1.1 | 1.0 | 1.1 | AT1G55020 | lipoxygenase (LOX1)                                                        |
| 237 | 257162_s_at | 151  | 1.1 | 0.9 | 0.4 | 367  | 1.0 | 0.8 | 0.5 | AT3G24290 | ammonium transporter -related                                              |
| 238 | 255140_x_at | 852  | 1.0 | 0.7 | 0.4 | 861  | 1.0 | 0.6 | 0.2 | AT4G08410 | proline-rich protein family                                                |
| 239 | 257267_at   | 435  | 0.9 | 0.7 | 0.4 | 631  | 1.0 | 0.8 | 0.9 | AT3G15030 | TCP family transcription factor, putative                                  |
| 240 | 261927_at   | 211  | 0.7 | 0.6 | 0.4 | 140  | 1.3 | 0.8 | 0.3 | AT1G22500 | RING-H2 zinc finger protein ATL5 -related                                  |
| 241 | 254122_at   | 1201 | 0.9 | 0.6 | 0.4 | 815  | 1.0 | 0.8 | 0.5 | AT4G24510 | CER2                                                                       |
| 242 | 261337_at   | 262  | 0.8 | 0.7 | 0.4 | 211  | 1.0 | 1.1 | 0.9 | AT1G44810 | expressed protein                                                          |
| 243 | 250500_at   | 2481 | 1.2 | 0.9 | 0.4 | 3770 | 1.1 | 1.4 | 1.7 | AT5G09530 | proline-rich protein family                                                |
| 244 | 245501_at   | 264  | 0.8 | 0.4 | 0.4 | 1278 | 1.1 | 0.7 | 0.6 | AT4G15620 | expressed protein                                                          |
| 245 | 261883_at   | 328  | 0.7 | 0.4 | 0.4 | 245  | 1.1 | 0.8 | 0.4 | AT1G80870 | protein kinase family                                                      |
| 246 | 251714_at   | 737  | 0.9 | 0.6 | 0.4 | 862  | 1.3 | 0.9 | 0.4 | AT3G56370 | leucine-rich repeat transmembrane protein kinase, putative                 |
| 247 | 261926_at   | 2407 | 0.8 | 0.5 | 0.4 | 1084 | 1.0 | 0.7 | 0.5 | AT1G22530 | expressed protein                                                          |
| 248 | 256852_at   | 262  | 1.0 | 0.8 | 0.4 | 263  | 0.9 | 2.5 | 6.0 | AT3G18610 | nucleolin, putative                                                        |

|            |             |      |     |     |     |      |     |      |      |           |                                                                     |
|------------|-------------|------|-----|-----|-----|------|-----|------|------|-----------|---------------------------------------------------------------------|
| <b>249</b> | 262711_at   | 334  | 0.8 | 0.8 | 0.4 | 283  | 1.0 | 0.8  | 1.0  | AT1G16500 | expressed protein                                                   |
| <b>250</b> | 254235_at   | 333  | 1.0 | 0.6 | 0.4 | 286  | 0.9 | 0.5  | 0.2  | AT4G23750 | AP2 domain transcription factor, putative                           |
| <b>251</b> | 256666_at   | 1686 | 1.0 | 0.7 | 0.4 | 2193 | 1.0 | 0.9  | 0.9  | AT3G20670 | histone H2A, putative                                               |
| <b>252</b> | 247470_at   | 621  | 0.8 | 0.7 | 0.4 | 544  | 0.9 | 0.7  | 0.4  | AT5G62220 | exostosin family                                                    |
| <b>253</b> | 248175_at   | 969  | 0.6 | 0.5 | 0.4 | 686  | 1.2 | 1.1  | 1.9  | AT5G54640 | histone H2A                                                         |
| <b>254</b> | 263914_at   | 422  | 0.8 | 0.5 | 0.4 | 156  | 1.2 | 1.1  | 1.4  | AT2G36400 | transcription activator (GRL3)                                      |
| <b>255</b> | 263841_at   | 2642 | 1.1 | 0.8 | 0.4 | 2099 | 1.1 | 1.3  | 0.5  | AT2G36870 | xyloglucan endotransglycosylase, putative                           |
| <b>256</b> | 253998_at   | 2009 | 0.8 | 0.8 | 0.4 | 1874 | 1.1 | 0.7  | 0.2  | AT4G26010 | peroxidase, putative                                                |
| <b>257</b> | 252515_at   | 649  | 1.4 | 0.3 | 0.4 | 26   | 1.2 | 13.3 | 59.7 | AT3G46230 | class I heat shock protein(HSP 17.4)                                |
| <b>258</b> | 262414_at   | 1064 | 0.8 | 0.6 | 0.4 | 956  | 1.0 | 0.9  | 0.6  | AT1G49430 | long-chain-fatty-acid--CoA ligase (acyl CoA synthetase)             |
| <b>259</b> | 261785_at   | 341  | 1.0 | 0.6 | 0.4 | 294  | 0.9 | 1.3  | 1.4  | AT1G08230 | amino acid transporter family                                       |
| <b>260</b> | 254697_at   | 646  | 0.7 | 0.6 | 0.4 | 694  | 1.0 | 0.6  | 0.4  | AT4G17970 | expressed protein                                                   |
| <b>261</b> | 263688_at   | 922  | 0.9 | 0.6 | 0.4 | 484  | 1.0 | 1.1  | 0.8  | AT1G26920 | expressed protein                                                   |
| <b>262</b> | 258589_at   | 1544 | 0.8 | 0.6 | 0.5 | 2284 | 1.0 | 0.9  | 0.3  | AT3G04290 | GDSL-motif lipase/hydrolase protein                                 |
| <b>263</b> | 250337_at   | 784  | 1.1 | 0.7 | 0.5 | 956  | 1.1 | 0.9  | 0.5  | AT5G11790 | Ndr family                                                          |
| <b>264</b> | 253920_at   | 1474 | 0.7 | 0.5 | 0.5 | 1321 | 1.1 | 1.0  | 0.6  | AT4G27230 | histone H2A, putative                                               |
| <b>265</b> | 248708_at   | 341  | 1.1 | 0.7 | 0.5 | 295  | 1.1 | 1.0  | 1.1  | AT5G48560 | bHLH protein family                                                 |
| <b>266</b> | 261411_at   | 1599 | 0.9 | 0.6 | 0.5 | 1404 | 1.2 | 1.0  | 0.9  | AT1G07790 | histone H2B, putative                                               |
| <b>267</b> | 264587_at   | 363  | 0.9 | 0.6 | 0.5 | 262  | 1.1 | 1.0  | 0.5  | AT1G05200 | glutamate receptor family (GLR3.4)                                  |
| <b>268</b> | 251226_at   | 2161 | 0.6 | 0.7 | 0.5 | 1785 | 1.3 | 0.6  | 0.2  | AT3G62680 | proline-rich protein family                                         |
| <b>269</b> | 266882_at   | 2765 | 1.1 | 0.8 | 0.5 | 2946 | 1.0 | 1.1  | 1.1  | AT2G44670 | senescence-associated protein -related                              |
| <b>270</b> | 252711_at   | 5445 | 0.8 | 0.7 | 0.5 | 4907 | 0.9 | 0.7  | 0.5  | AT3G43720 | protease inhibitor/seed storage/lipid transfer protein (LTP) family |
| <b>271</b> | 256626_at   | 332  | 0.7 | 0.5 | 0.5 | 479  | 1.2 | 0.9  | 0.6  | AT3G20015 | expressed protein                                                   |
| <b>272</b> | 260490_at   | 2651 | 0.9 | 0.6 | 0.5 | 2334 | 1.0 | 0.8  | 0.6  | AT1G51500 | ABC transporter family protein                                      |
| <b>273</b> | 260205_at   | 1208 | 1.2 | 1.0 | 0.5 | 240  | 1.2 | 0.9  | 0.7  | AT1G70700 | expressed protein                                                   |
| <b>274</b> | 266369_at   | 391  | 0.9 | 0.6 | 0.5 | 251  | 1.1 | 0.8  | 0.6  | AT2G41370 | expressed protein                                                   |
| <b>275</b> | 261323_at   | 634  | 1.1 | 0.8 | 0.5 | 733  | 1.1 | 0.8  | 0.5  | AT1G44760 | expressed protein                                                   |
| <b>276</b> | 252619_at   | 842  | 0.8 | 0.7 | 0.5 | 532  | 0.9 | 0.8  | 0.7  | AT3G45210 | expressed protein                                                   |
| <b>277</b> | 259617_at   | 999  | 0.8 | 0.7 | 0.5 | 825  | 0.9 | 1.2  | 1.7  | AT1G47970 | expressed protein                                                   |
| <b>278</b> | 251330_at   | 1160 | 0.8 | 0.7 | 0.5 | 914  | 1.0 | 0.7  | 0.6  | AT3G61550 | zinc finger (RING finger) protein family                            |
| <b>279</b> | 245861_at   | 628  | 0.8 | 0.5 | 0.5 | 380  | 1.0 | 1.0  | 0.6  | AT5G28300 | GTL1 - like protein                                                 |
| <b>280</b> | 262727_at   | 2522 | 0.8 | 0.9 | 0.5 | 1895 | 0.9 | 1.0  | 0.9  | AT1G75800 | thaumatin family                                                    |
| <b>281</b> | 261563_at   | 1653 | 0.9 | 0.7 | 0.5 | 1882 | 1.0 | 0.7  | 0.4  | AT1G01630 | SEC14 cytosolic factor, putative                                    |
| <b>282</b> | 265169_x_at | 1622 | 0.8 | 0.7 | 0.5 | 1611 | 1.0 | 0.6  | 0.4  | AT1G23720 | proline-rich protein family                                         |
| <b>283</b> | 254839_at   | 381  | 1.1 | 0.6 | 0.5 | 195  | 1.0 | 1.2  | 2.8  | AT4G12400 | stress inducible protein (sti), putative                            |
| <b>284</b> | 263151_at   | 431  | 0.7 | 0.8 | 0.5 | 484  | 0.9 | 1.2  | 0.7  | AT1G54120 | expressed protein                                                   |
| <b>285</b> | 256299_at   | 4106 | 0.7 | 0.6 | 0.5 | 2161 | 0.9 | 0.6  | 0.4  | AT1G69530 | expansin, putative (EXP1)                                           |



|            |             |      |     |     |     |      |     |     |     |           |                                                                        |
|------------|-------------|------|-----|-----|-----|------|-----|-----|-----|-----------|------------------------------------------------------------------------|
| <b>286</b> | 254119_at   | 3383 | 0.6 | 0.5 | 0.5 | 3461 | 1.0 | 0.7 | 0.3 | AT4G24780 | polysaccharide lyase family 1 (pectate lyase)                          |
| <b>287</b> | 252238_at   | 924  | 0.5 | 0.5 | 0.5 | 474  | 1.4 | 0.8 | 0.2 | AT3G49960 | peroxidase, putative                                                   |
| <b>288</b> | 247467_at   | 701  | 1.1 | 1.0 | 0.5 | 571  | 1.1 | 0.8 | 0.5 | AT5G62130 | expressed protein                                                      |
| <b>289</b> | 264783_at   | 469  | 1.1 | 1.0 | 0.5 | 302  | 1.4 | 0.8 | 0.8 | AT1G08650 | phosphoenolpyruvate carboxylase kinase, putative                       |
| <b>290</b> | 258119_at   | 1156 | 0.9 | 0.7 | 0.5 | 947  | 1.1 | 1.1 | 1.1 | AT3G14720 | mitogen-activated protein kinase (MAPK), putative (MPK19)              |
| <b>291</b> | 253372_at   | 2913 | 1.1 | 0.7 | 0.5 | 1802 | 0.9 | 0.9 | 0.7 | AT4G33220 | pectinesterase family                                                  |
| <b>292</b> | 246580_at   | 515  | 0.8 | 0.6 | 0.5 | 597  | 0.9 | 0.8 | 0.6 | AT1G31770 | ABC transporter family protein                                         |
| <b>293</b> | 251842_at   | 469  | 0.8 | 0.9 | 0.5 | 555  | 1.2 | 0.5 | 0.2 | AT3G54580 | proline-rich protein family                                            |
| <b>294</b> | 265042_at   | 4688 | 1.0 | 0.7 | 0.5 | 5146 | 0.8 | 0.5 | 0.2 | AT1G04040 | acid phosphatase -related                                              |
| <b>295</b> | 250167_at   | 198  | 1.2 | 0.9 | 0.5 | 323  | 1.0 | 0.7 | 0.3 | AT5G15310 | myb family transcription factor                                        |
| <b>296</b> | 261924_at   | 858  | 1.4 | 0.9 | 0.5 | 426  | 1.1 | 1.1 | 0.6 | AT1G22550 | peptide transporter -related                                           |
| <b>297</b> | 256937_at   | 1925 | 1.1 | 1.1 | 0.5 | 1576 | 0.9 | 1.0 | 1.7 | AT3G22620 | protease inhibitor/seed storage/lipid transfer protein (LTP) family    |
| <b>298</b> | 256848_at   | 607  | 0.9 | 0.7 | 0.5 | 571  | 1.0 | 0.8 | 1.1 | AT3G27960 | kinesin light chain - related                                          |
| <b>299</b> | 247297_at   | 5259 | 1.1 | 0.8 | 0.5 | 3444 | 1.1 | 0.8 | 0.5 | AT5G64100 | peroxidase, putative                                                   |
| <b>300</b> | 245993_at   | 5279 | 0.9 | 0.6 | 0.5 | 6778 | 1.0 | 0.8 | 0.5 | AT5G20700 | senescence-associated protein -related                                 |
| <b>301</b> | 262164_at   | 528  | 1.2 | 1.0 | 0.5 | 331  | 0.8 | 1.0 | 1.6 | AT1G78070 | expressed protein                                                      |
| <b>302</b> | 258082_at   | 159  | 0.6 | 0.7 | 0.5 | 204  | 1.0 | 0.6 | 0.3 | AT3G25905 | CLE27, putative                                                        |
| <b>303</b> | 262312_at   | 2743 | 0.9 | 0.7 | 0.5 | 2989 | 1.0 | 0.5 | 0.2 | AT1G70830 | Bet v I allergen family                                                |
| <b>304</b> | 261772_at   | 1196 | 0.9 | 0.6 | 0.5 | 307  | 1.1 | 0.8 | 0.7 | AT1G76240 | expressed protein                                                      |
| <b>305</b> | 267053_s_at | 1219 | 0.9 | 0.7 | 0.5 | 2910 | 1.2 | 0.8 | 0.4 | AT2G38390 | peroxidase, putative                                                   |
| <b>306</b> | 250428_at   | 2910 | 0.9 | 0.7 | 0.5 | 2525 | 0.9 | 0.7 | 0.5 | AT5G10480 | protein phosphatase -related                                           |
| <b>307</b> | 249651_at   | 444  | 1.1 | 0.6 | 0.5 | 361  | 1.0 | 1.0 | 0.8 | AT5G37020 | auxin response transcription factor(ARF8)                              |
| <b>308</b> | 257260_at   | 499  | 1.2 | 1.0 | 0.5 | 431  | 1.2 | 1.1 | 0.8 | AT3G22104 | expressed protein                                                      |
| <b>309</b> | 261907_at   | 732  | 2.0 | 1.0 | 0.5 | 1292 | 1.1 | 1.4 | 0.5 | AT1G65060 | 4-coumarate:CoA ligase 3 (4-coumaroyl-CoA synthase 3) (4CL3), putative |
| <b>310</b> | 259737_at   | 733  | 0.9 | 0.7 | 0.5 | 1112 | 1.0 | 0.8 | 0.5 | AT1G64400 | long-chain-fatty-acid--CoA ligase (acyl-CoA synthetase), putative      |
| <b>311</b> | 249008_at   | 956  | 0.6 | 0.4 | 0.5 | 725  | 0.9 | 0.7 | 0.4 | AT5G44680 | expressed protein                                                      |
| <b>312</b> | 253172_at   | 1794 | 1.0 | 0.9 | 0.5 | 1249 | 1.0 | 0.7 | 0.6 | AT4G35060 | copper chaperone (CCH)-related                                         |
| <b>313</b> | 251843_x_at | 2729 | 0.8 | 0.7 | 0.5 | 2732 | 1.1 | 0.6 | 0.2 | AT3G54590 | proline-rich protein family                                            |
| <b>314</b> | 262411_at   | 629  | 0.8 | 0.6 | 0.5 | 507  | 1.0 | 0.8 | 0.4 | AT1G34640 | expressed protein                                                      |
| <b>315</b> | 253579_at   | 640  | 1.0 | 0.8 | 0.5 | 883  | 0.8 | 0.6 | 0.3 | AT4G30610 | serine carboxypeptidase -related                                       |
| <b>316</b> | 260025_at   | 633  | 0.8 | 0.6 | 0.5 | 309  | 0.9 | 1.4 | 2.6 | AT1G30070 | expressed protein                                                      |
| <b>317</b> | 254789_at   | 3866 | 0.8 | 0.7 | 0.5 | 4525 | 1.0 | 0.7 | 0.3 | AT4G12880 | plastocyanin-like domain containing protein                            |
| <b>318</b> | 248646_at   | 611  | 0.6 | 0.5 | 0.5 | 553  | 1.1 | 0.7 | 0.4 | AT5G49100 | expressed protein                                                      |
| <b>319</b> | 244991_s_at | 509  | 0.6 | 0.6 | 0.5 | 817  | 0.9 | 0.5 | 0.2 | ATCG00890 | NADH dehydrogenase subunit 2                                           |
| <b>320</b> | 261813_at   | 526  | 0.9 | 0.7 | 0.5 | 463  | 0.9 | 0.8 | 0.7 | AT1G08280 | sialyltransferase family                                               |

|            |           |      |     |     |     |      |     |     |     |           |                                                   |
|------------|-----------|------|-----|-----|-----|------|-----|-----|-----|-----------|---------------------------------------------------|
| <b>321</b> | 245317_at | 2715 | 0.9 | 0.8 | 0.5 | 1349 | 1.0 | 0.9 | 2.1 | AT4G15610 | expressed integral membrane protein common family |
| <b>322</b> | 263320_at | 854  | 0.7 | 0.6 | 0.5 | 106  | 1.0 | 1.2 | 2.5 | AT2G47180 | galactinol synthase, putative                     |
| <b>323</b> | 250801_at | 753  | 0.7 | 0.7 | 0.5 | 717  | 1.1 | 0.6 | 0.2 | AT5G04960 | pectinesterase family                             |
| <b>324</b> | 261610_at | 272  | 0.8 | 0.6 | 0.5 | 274  | 1.1 | 0.8 | 0.6 | AT1G49560 | myb family transcription factor                   |
| <b>325</b> | 251476_at | 269  | 0.9 | 0.6 | 0.5 | 334  | 0.8 | 1.3 | 1.3 | AT3G59670 | hypothetical protein                              |
| <b>326</b> | 252280_at | 885  | 0.7 | 0.5 | 0.5 | 865  | 1.0 | 0.6 | 0.3 | AT3G49260 | SF16 -related protein                             |
| <b>327</b> | 249309_at | 482  | 0.9 | 0.7 | 0.5 | 549  | 1.2 | 1.2 | 1.1 | AT5G41410 | homeodomain protein, BELL1 (BEL1)                 |
| <b>328</b> | 264348_at | 2645 | 0.6 | 0.5 | 0.5 | 3724 | 0.9 | 0.7 | 0.5 | AT1G12110 | putative NPK1-related protein kinase 2            |
| <b>329</b> | 251524_at | 1086 | 0.8 | 0.6 | 0.5 | 2119 | 1.0 | 0.8 | 0.2 | AT3G58990 | aconitase family                                  |
| <b>330</b> | 258432_at | 1480 | 0.9 | 0.7 | 0.5 | 1741 | 0.9 | 0.9 | 0.5 | AT3G16570 | expressed protein                                 |
| <b>331</b> | 246142_at | 172  | 0.8 | 0.6 | 0.5 | 201  | 0.7 | 0.4 | 0.3 | AT5G19970 | hypothetical protein                              |
| <b>332</b> | 260876_at | 1313 | 1.0 | 0.8 | 0.5 | 1486 | 1.0 | 1.5 | 1.0 | AT1G21460 | nodulin MtN3 family protein                       |
| <b>333</b> | 267592_at | 539  | 1.2 | 1.0 | 0.5 | 383  | 1.0 | 1.1 | 1.3 | AT2G39710 | expressed protein                                 |
| <b>334</b> | 248292_at | 438  | 0.6 | 0.5 | 0.5 | 205  | 1.1 | 1.1 | 0.7 | AT5G53030 | expressed protein                                 |
| <b>335</b> | 264898_at | 609  | 0.9 | 0.6 | 0.5 | 1343 | 1.0 | 0.7 | 0.2 | AT1G23205 | pectinesterase - related                          |
| <b>336</b> | 253663_at | 702  | 0.9 | 0.6 | 0.5 | 570  | 1.1 | 1.1 | 1.1 | AT4G30160 | villin -related                                   |
| <b>337</b> | 262096_at | 324  | 0.9 | 0.7 | 0.5 | 285  | 1.2 | 0.8 | 0.5 | AT1G56010 | NAC1 / No apical meristem (NAM) protein family    |
| <b>338</b> | 251183_at | 629  | 1.0 | 0.6 | 0.5 | 468  | 1.0 | 0.9 | 0.6 | AT3G62630 | expressed protein                                 |
| <b>339</b> | 252472_at | 710  | 0.8 | 0.7 | 0.5 | 821  | 1.0 | 0.9 | 0.8 | AT3G46830 | GTP-binding protein, putative                     |
| <b>340</b> | 263325_at | 507  | 0.6 | 0.6 | 0.5 | 622  | 1.2 | 1.2 | 0.6 | AT2G04240 | C3HC4-type zinc finger protein family             |
| <b>341</b> | 266336_at | 475  | 1.0 | 0.7 | 0.5 | 472  | 1.3 | 0.9 | 0.3 | AT2G32270 | zinc transporter (ZIP3)                           |
| <b>342</b> | 262040_at | 187  | 1.2 | 0.6 | 0.5 | 195  | 1.0 | 1.0 | 0.5 | AT1G80080 | leucine rich repeat protein family                |
| <b>343</b> | 264188_at | 2124 | 0.8 | 0.6 | 0.5 | 2111 | 0.9 | 1.1 | 0.9 | AT1G54690 | histone H2A, putative                             |
| <b>344</b> | 261825_at | 663  | 0.9 | 0.6 | 0.5 | 670  | 0.8 | 0.5 | 0.3 | AT1G11545 | xyloglucan endotransglycosylase, putative         |
| <b>345</b> | 255622_at | 1215 | 1.1 | 1.1 | 0.5 | 1335 | 1.1 | 1.1 | 1.0 | AT4G01070 | glycosyltransferase family                        |
| <b>346</b> | 262590_at | 1541 | 1.2 | 0.9 | 0.5 | 1233 | 0.9 | 0.8 | 0.8 | AT1G15100 | C3HC4-type zinc finger protein family             |
| <b>347</b> | 247664_at | 550  | 1.2 | 0.7 | 0.5 | 477  | 1.0 | 1.0 | 0.8 | AT5G60120 | AP2 domain transcription factor, putative         |
| <b>348</b> | 252943_at | 5346 | 1.0 | 0.7 | 0.5 | 6656 | 1.1 | 0.7 | 0.3 | AT4G39330 | mannitol dehydrogenase, putative                  |
| <b>349</b> | 254232_at | 1358 | 0.7 | 0.6 | 0.5 | 2676 | 1.1 | 1.1 | 0.4 | AT4G23600 | aminotransferase family                           |
| <b>350</b> | 251924_at | 1674 | 0.7 | 0.5 | 0.5 | 1905 | 1.0 | 0.8 | 0.5 | AT3G53730 | histone H4                                        |
| <b>351</b> | 262539_at | 1673 | 0.9 | 0.6 | 0.5 | 1531 | 1.0 | 0.8 | 0.3 | AT1G17200 | expressed integral membrane protein common family |
| <b>352</b> | 247549_at | 728  | 0.6 | 0.5 | 0.5 | 804  | 1.0 | 1.0 | 0.6 | AT5G61420 | myb-related transcription factor(mixta), putative |
| <b>353</b> | 263809_at | 555  | 0.8 | 0.7 | 0.5 | 624  | 0.9 | 0.8 | 0.8 | AT2G04570 | GDSL-motif lipase/hydrolase protein               |
| <b>354</b> | 260521_at | 943  | 0.9 | 0.7 | 0.5 | 710  | 1.0 | 1.0 | 0.8 | AT2G41740 | villin 2 -related                                 |
| <b>355</b> | 257041_at | 783  | 0.6 | 0.7 | 0.5 | 855  | 1.1 | 0.6 | 0.3 | AT3G28550 | proline-rich protein family                       |
| <b>356</b> | 264007_at | 3552 | 1.0 | 0.7 | 0.5 | 3125 | 0.9 | 0.6 | 0.3 | AT2G21140 | proline-rich protein family                       |
| <b>357</b> | 252618_at | 2868 | 0.8 | 0.5 | 0.5 | 9359 | 1.0 | 0.6 | 0.2 | AT3G45140 | lipoxygenase (LOX2)                               |

|            |           |      |     |     |     |      |     |     |     |           |                                                            |
|------------|-----------|------|-----|-----|-----|------|-----|-----|-----|-----------|------------------------------------------------------------|
| <b>358</b> | 250306_at | 205  | 1.3 | 0.7 | 0.5 | 187  | 1.0 | 1.2 | 1.0 | AT5G12160 | expressed protein                                          |
| <b>359</b> | 267534_at | 764  | 1.0 | 0.6 | 0.5 | 544  | 1.1 | 1.2 | 1.5 | AT2G41900 | CCCH-type zinc finger protein -related                     |
| <b>360</b> | 265102_at | 522  | 0.8 | 0.9 | 0.5 | 568  | 1.1 | 0.7 | 0.2 | AT1G30870 | cationic peroxidase, putative                              |
| <b>361</b> | 249123_at | 1052 | 0.9 | 0.7 | 0.5 | 812  | 0.9 | 0.9 | 0.9 | AT5G43760 | beta-ketoacyl-CoA synthase, putative                       |
| <b>362</b> | 260282_at | 970  | 1.1 | 0.9 | 0.5 | 923  | 1.0 | 1.5 | 1.4 | AT1G80410 | acetyltransferase - related                                |
| <b>363</b> | 248820_at | 749  | 0.7 | 0.6 | 0.5 | 564  | 1.2 | 1.1 | 1.4 | AT5G47060 | senescence-associated protein -related                     |
| <b>364</b> | 267483_at | 457  | 0.7 | 0.6 | 0.5 | 408  | 1.1 | 1.4 | 1.8 | AT2G02810 | expressed protein                                          |
| <b>365</b> | 256482_at | 2217 | 0.9 | 0.7 | 0.5 | 1605 | 1.0 | 0.8 | 0.6 | AT1G31420 | leucine-rich repeat transmembrane protein kinase, putative |

Fold induction for 305-1h is averaged from four independent ATH-1 array hybridizations, all others from two independent array hybridizations. Applied threshold is 2-fold. Annotation June 15, 2003.
