# Supplementary material
Source: PubMed Central journal article supplement (PMC337064)
Supplement: pnas_0308044100_7.pdf [file pnas_0308044100_7.pdf]

**Table 7. 305\_6hr\_increase**

| Probe set     | Expression level (327, 1h) | Fold induction |         |      | quartz, level (327, 1h) | Fold induction |         |     | Identifier                                                        |
|---------------|----------------------------|----------------|---------|------|-------------------------|----------------|---------|-----|-------------------------------------------------------------------|
|               |                            | 305, 1h        | 295, 1h | 1h   |                         | 305, 6h        | 295, 6h | 6h  |                                                                   |
| 1 254283_s_at | 17                         | 7.2            | 1.0     | 13.7 | 293                     | 2.6            | 2.1     | 0.4 | AT4G22870 leucoanthocyanidin dioxygenase (anthocyanidin synthase) |

Fold induction for 305-1h is averaged from four independent ATH-1 array hybridizations, all others from two independent array hybridizations. Applied threshold is 2-fold. Annotation June 15, 2003.
