# Supplementary material
Source: PubMed Central journal article supplement (PMC337064)
Supplement: pnas_0308044100_8.pdf [file pnas_0308044100_8.pdf]

**Table 8. 305\_6hr\_decrease**

| Probe set   | Expression level (327, 1h) | Fold induction |         |            | Expression level (327, 1h) | Fold induction |         |            | Identifier                                           |
|-------------|----------------------------|----------------|---------|------------|----------------------------|----------------|---------|------------|------------------------------------------------------|
|             |                            | 305, 1h        | 295, 1h | quartz, 1h |                            | 305, 6h        | 295, 6h | quartz, 6h |                                                      |
| 1 249052_at | 509                        | 1.1            | 1.1     | 1.5        | 300                        | 0.4            | 0.8     | 0.9        | AT5G44420 plant defensin protein, putative (PDF1.2a) |

Fold induction for 305-1h is averaged from four independent ATH-1 array hybridizations, all others from two independent array hybridizations. Applied threshold is 2-fold. Annotation June 15, 2003.
