# Supplementary material
Source: PubMed Central journal article supplement (PMC337064)
Supplement: pnas_0308044100_9.pdf [file pnas_0308044100_9.pdf]

**Table 9. 295\_6hr\_increase**

|           | Probe set   | Fold induction             |         |         |            | Fold induction             |         |         |            | Identifier |                                                               |
|-----------|-------------|----------------------------|---------|---------|------------|----------------------------|---------|---------|------------|------------|---------------------------------------------------------------|
|           |             | Expression level (327, 1h) | 305, 1h | 295, 1h | quartz, 1h | Expression level (327, 1h) | 305, 6h | 295, 6h | quartz, 6h |            |                                                               |
| <b>1</b>  | 254059_at   | 573                        | 1.1     | 0.3     | 0.4        | 21                         | 4.7     | 106.3   | 674.6      | AT4G25200  | mitochondrion-localized small heat shock protein              |
| <b>2</b>  | 255941_at   | 51                         | 1.8     | 4.9     | 10.0       | 5                          | 5.2     | 34.2    | 170.4      | AT1G20350  | mitochondrial inner membrane translocase component -related   |
| <b>3</b>  | 262307_at   | 306                        | 0.6     | 0.3     | 0.2        | 34                         | 0.6     | 17.0    | 74.9       | AT1G71000  | DnaJ protein family                                           |
| <b>4</b>  | 265422_at   | 9                          | 3.1     | 1.6     | 1.1        | 22                         | 0.6     | 14.6    | 61.7       | AT2G20800  | NADH dehydrogenase family                                     |
| <b>5</b>  | 263515_at   | 128                        | 1.7     | 3.5     | 2.8        | 95                         | 1.3     | 14.3    | 33.6       | AT2G21640  | expressed protein                                             |
| <b>6</b>  | 261065_at   | 95                         | 4.1     | 4.2     | 5.3        | 47                         | 2.7     | 7.0     | 22.9       | AT1G07500  | hypothetical protein                                          |
| <b>7</b>  | 264042_at   | 163                        | 5.4     | 30.3    | 25.7       | 157                        | 0.8     | 5.8     | 36.7       | AT2G03760  | steroid sulfotransferase, putative                            |
| <b>8</b>  | 248434_at   | 450                        | 2.2     | 2.9     | 1.7        | 157                        | 1.0     | 5.5     | 15.7       | AT5G51440  | heat shock protein, putative                                  |
| <b>9</b>  | 255317_at   | 66                         | 1.1     | 1.2     | 1.5        | 43                         | 2.2     | 5.2     | 6.7        | AT4G04180  | vesicle transfer ATPase -related                              |
| <b>10</b> | 259015_at   | 125                        | 1.3     | 2.2     | 3.3        | 75                         | 2.5     | 5.0     | 6.4        | AT3G07350  | expressed protein                                             |
| <b>11</b> | 256245_at   | 4032                       | 0.9     | 0.6     | 0.3        | 946                        | 1.0     | 4.8     | 9.8        | AT3G12580  | heat shock protein hsp70                                      |
| <b>12</b> | 252136_at   | 53                         | 1.6     | 4.0     | 5.4        | 87                         | 1.0     | 4.7     | 29.3       | AT3G50770  | calmodulin-related protein, putative                          |
| <b>13</b> | 258321_at   | 3369                       | 4.5     | 3.8     | 2.6        | 466                        | 1.1     | 4.7     | 7.3        | AT3G22840  | early light-induced protein                                   |
| <b>14</b> | 265221_s_at | 179                        | 0.6     | 0.9     | 1.5        | 30                         | 0.8     | 4.6     | 21.5       | AT2G02010  | glutamate decarboxylase                                       |
| <b>15</b> | 260522_x_at | 164                        | 6.9     | 47.7    | 47.2       | 157                        | 0.8     | 4.5     | 43.9       | AT2G41730  | expressed protein                                             |
| <b>16</b> | 260881_at   | 67                         | 2.0     | 8.1     | 11.9       | 47                         | 0.9     | 4.5     | 23.7       | AT1G21550  | calcium-binding protein, putative                             |
| <b>17</b> | 262911_s_at | 728                        | 0.9     | 0.7     | 1.0        | 63                         | 1.5     | 4.4     | 21.6       | AT1G59860  | heat shock protein, putative                                  |
| <b>18</b> | 250515_at   | 128                        | 1.1     | 1.8     | 1.6        | 184                        | 1.2     | 4.4     | 7.4        | AT5G09570  | expressed protein                                             |
| <b>19</b> | 246295_at   | 87                         | 0.8     | 0.8     | 1.0        | 53                         | 0.7     | 4.2     | 5.6        | AT3G56690  | calmodulin-binding protein                                    |
| <b>20</b> | 253046_at   | 83                         | 2.3     | 23.2    | 27.3       | 57                         | 1.3     | 4.2     | 60.8       | AT4G37370  | cytochrome P450, putative                                     |
| <b>21</b> | 263231_at   | 108                        | 3.2     | 17.2    | 14.9       | 166                        | 0.8     | 4.2     | 20.0       | AT1G05680  | glycosyltransferase family                                    |
| <b>22</b> | 261240_at   | 151                        | 1.2     | 1.3     | 1.5        | 130                        | 1.7     | 4.1     | 15.3       | AT1G32940  | subtilisin-like serine protease                               |
| <b>23</b> | 266070_at   | 67                         | 0.5     | 1.1     | 1.3        | 30                         | 0.8     | 4.1     | 39.1       | AT2G18660  | expressed protein                                             |
| <b>24</b> | 255430_at   | 367                        | 1.5     | 2.8     | 2.2        | 290                        | 0.9     | 4.1     | 12.7       | AT4G03320  | chloroplast protein import component -related                 |
| <b>25</b> | 260933_at   | 69                         | 1.4     | 2.3     | 1.3        | 47                         | 1.7     | 4.1     | 12.5       | AT1G02470  | expressed protein                                             |
| <b>26</b> | 252334_at   | 52                         | 1.2     | 3.8     | 3.6        | 75                         | 1.1     | 4.0     | 30.1       | AT3G48850  | mitochondrial phosphate transporter, putative                 |
| <b>27</b> | 264148_at   | 32                         | 2.3     | 2.4     | 2.8        | 37                         | 0.9     | 4.0     | 9.3        | AT1G02220  | NAM (no apical meristem)-related protein                      |
| <b>28</b> | 248332_at   | 2375                       | 0.9     | 0.5     | 0.3        | 475                        | 0.9     | 3.9     | 14.1       | AT5G52640  | heat shock protein 81-1 (HSP81-1/heat shock protein 83/HSP83) |
| <b>29</b> | 245306_at   | 2489                       | 7.8     | 7.8     | 5.2        | 444                        | 1.5     | 3.8     | 5.4        | AT4G14690  | expressed protein                                             |
| <b>30</b> | 260287_at   | 320                        | 1.4     | 2.5     | 4.3        | 114                        | 1.8     | 3.8     | 8.3        | AT1G80440  | Kelch repeat containing F-box protein family                  |

|    |             |       |      |      |      |      |     |     |      |           |                                                      |
|----|-------------|-------|------|------|------|------|-----|-----|------|-----------|------------------------------------------------------|
| 31 | 246228_at   | 146   | 1.4  | 1.1  | 1.1  | 220  | 1.0 | 3.8 | 3.0  | AT4G36430 | peroxidase, putative                                 |
| 32 | 260140_at   | 46    | 17.6 | 2.3  | 1.2  | 74   | 1.2 | 3.7 | 2.6  | AT1G66390 | myb family transcription factor                      |
| 33 | 254443_at   | 34    | 17.2 | 16.5 | 14.4 | 54   | 1.6 | 3.7 | 5.5  | AT4G21070 | BRCT domain-containing protein                       |
| 34 | 264868_at   | 54    | 1.6  | 3.0  | 2.6  | 59   | 1.3 | 3.7 | 17.0 | AT1G24090 | RNase H domain-containing protein                    |
| 35 | 251975_at   | 443   | 1.1  | 1.1  | 0.7  | 406  | 1.1 | 3.6 | 8.9  | AT3G53230 | CDC48 - like protein                                 |
| 36 | 263345_s_at | 17564 | 1.4  | 1.1  | 1.5  | 1352 | 1.4 | 3.5 | 9.0  | AT2G05070 | light-harvesting chlorophyll a/b binding protein     |
| 37 | 248657_at   | 2151  | 0.7  | 0.3  | 0.3  | 158  | 1.3 | 3.4 | 8.5  | AT5G48570 | peptidylprolyl isomerase                             |
| 38 | 246099_at   | 840   | 1.6  | 4.3  | 5.7  | 288  | 0.9 | 3.3 | 12.2 | AT5G20230 | plastocyanin-like domain containing protein          |
| 39 | 252415_at   | 879   | 1.0  | 1.0  | 1.6  | 78   | 2.4 | 3.3 | 7.3  | AT3G47340 | glutamine-dependent asparagine synthetase            |
| 40 | 247800_at   | 202   | 0.7  | 2.2  | 2.4  | 385  | 1.2 | 3.3 | 5.5  | AT5G58570 | expressed protein                                    |
| 41 | 254543_at   | 128   | 0.9  | 1.6  | 1.7  | 152  | 1.1 | 3.3 | 7.7  | AT4G19810 | glycosyl hydrolase family 18                         |
| 42 | 266071_at   | 71    | 1.1  | 3.7  | 7.1  | 76   | 1.0 | 3.2 | 40.6 | AT2G18680 | expressed protein                                    |
| 43 | 248668_at   | 162   | 3.0  | 2.8  | 2.1  | 151  | 1.5 | 3.2 | 5.7  | AT5G48720 | hypothetical protein                                 |
| 44 | 247323_at   | 1031  | 1.6  | 1.1  | 0.9  | 68   | 0.5 | 3.2 | 7.2  | AT5G64170 | expressed protein                                    |
| 45 | 253416_at   | 208   | 2.0  | 2.1  | 1.0  | 282  | 1.0 | 3.2 | 13.2 | AT4G33070 | pyruvate decarboxylase-1 (Pdc1)                      |
| 46 | 262518_at   | 726   | 1.4  | 4.7  | 2.8  | 1255 | 1.0 | 3.1 | 5.4  | AT1G17170 | glutathione transferase, putative                    |
| 47 | 262517_at   | 282   | 1.6  | 3.7  | 2.3  | 443  | 1.0 | 3.1 | 8.1  | AT1G17180 | glutathione transferase, putative                    |
| 48 | 253496_at   | 1307  | 3.5  | 3.0  | 2.0  | 425  | 1.7 | 3.0 | 2.9  | AT4G31870 | glutathione peroxidase, putative                     |
| 49 | 257635_at   | 331   | 0.6  | 1.1  | 1.0  | 100  | 1.9 | 3.0 | 2.7  | AT3G26280 | cytochrome P450 family                               |
| 50 | 266294_at   | 1771  | 0.8  | 0.4  | 0.4  | 171  | 1.0 | 2.9 | 6.6  | AT2G29500 | small heat shock protein -related                    |
| 51 | 257206_at   | 879   | 1.9  | 3.0  | 2.8  | 709  | 1.4 | 2.9 | 6.1  | AT3G16530 | lectin -related                                      |
| 52 | 251176_at   | 80    | 1.3  | 4.2  | 4.2  | 106  | 1.0 | 2.9 | 32.6 | AT3G63380 | calcium-transporting ATPase (calcium pump), putative |
| 53 | 248686_at   | 991   | 1.6  | 3.0  | 3.4  | 253  | 1.1 | 2.8 | 9.3  | AT5G48540 | 33 kDa secretory protein-related                     |
| 54 | 247540_at   | 394   | 0.8  | 0.9  | 0.8  | 252  | 1.2 | 2.8 | 2.1  | AT5G61590 | ethylene responsive element binding factor, putative |
| 55 | 257628_at   | 637   | 0.8  | 0.7  | 0.8  | 182  | 1.2 | 2.8 | 2.6  | AT3G26290 | cytochrome p450 71B26                                |
| 56 | 248049_at   | 484   | 2.0  | 1.8  | 1.0  | 298  | 1.4 | 2.7 | 3.7  | AT5G56090 | expressed protein                                    |
| 57 | 246282_at   | 92    | 1.1  | 1.8  | 1.1  | 154  | 0.8 | 2.7 | 5.6  | AT4G36580 | ATPase-related protein                               |
| 58 | 262986_at   | 470   | 1.3  | 2.7  | 5.4  | 333  | 1.3 | 2.7 | 3.0  | AT1G23390 | Kelch repeat containing F-box protein family         |
| 59 | 263403_at   | 195   | 1.3  | 3.3  | 3.6  | 92   | 1.1 | 2.6 | 19.7 | AT2G04040 | MATE efflux protein family                           |
| 60 | 259507_at   | 119   | 1.7  | 7.5  | 7.4  | 234  | 0.9 | 2.6 | 19.4 | AT1G43910 | AAA-type ATPase family                               |
| 61 | 247585_at   | 296   | 0.9  | 1.2  | 1.7  | 262  | 1.2 | 2.6 | 2.5  | AT5G60680 | expressed protein                                    |
| 62 | 251443_at   | 684   | 1.0  | 1.5  | 2.1  | 734  | 1.2 | 2.6 | 1.9  | AT3G59940 | Kelch repeat containing F-box protein family         |
| 63 | 267168_at   | 127   | 1.4  | 1.5  | 1.1  | 297  | 1.0 | 2.6 | 2.8  | AT2G37770 | aldo/keto reductase family                           |
| 64 | 253161_at   | 2879  | 0.6  | 0.5  | 1.1  | 66   | 1.6 | 2.6 | 8.7  | AT4G35770 | senescence-associated protein sen1                   |
| 65 | 253890_s_at | 592   | 1.5  | 1.9  | 1.5  | 577  | 1.0 | 2.6 | 6.7  | AT5G54100 | expressed protein                                    |
| 66 | 259937_s_at | 420   | 1.1  | 3.4  | 3.4  | 332  | 1.1 | 2.6 | 7.3  | AT1G71330 | ABC transporter family protein                       |
| 67 | 250914_at   | 76    | 1.0  | 1.0  | 1.1  | 60   | 0.8 | 2.6 | 3.7  | AT5G03780 | myb -related protein                                 |

|     |             |      |     |      |      |      |     |     |      |           |                                                                     |
|-----|-------------|------|-----|------|------|------|-----|-----|------|-----------|---------------------------------------------------------------------|
| 68  | 258239_at   | 4368 | 1.7 | 1.3  | 2.0  | 237  | 1.6 | 2.6 | 7.4  | AT3G27690 | light harvesting chlorophyll A/B binding protein, putative          |
| 69  | 262119_s_at | 3524 | 1.5 | 1.8  | 1.8  | 2618 | 1.0 | 2.6 | 4.7  | AT1G02930 | glutathione transferase, putative                                   |
| 70  | 265200_s_at | 139  | 4.7 | 13.3 | 11.6 | 144  | 1.4 | 2.6 | 5.6  | AT2G36790 | glucosyl transferase -related                                       |
| 71  | 261187_at   | 194  | 1.6 | 1.8  | 1.6  | 181  | 1.0 | 2.5 | 6.1  | AT1G32860 | glycosyl hydrolase family 17                                        |
| 72  | 256852_at   | 262  | 1.0 | 0.8  | 0.4  | 263  | 0.9 | 2.5 | 6.0  | AT3G18610 | nucleolin, putative                                                 |
| 73  | 267066_at   | 445  | 2.9 | 2.4  | 1.4  | 190  | 1.3 | 2.5 | 3.3  | AT2G41040 | expressed protein                                                   |
| 74  | 265111_at   | 3695 | 1.2 | 1.1  | 1.1  | 309  | 1.1 | 2.5 | 4.4  | AT1G62510 | protease inhibitor/seed storage/lipid transfer protein (LTP) family |
| 75  | 246850_at   | 258  | 1.0 | 0.8  | 0.7  | 305  | 1.3 | 2.5 | 3.0  | AT5G26860 | Lon protease homolog 2 precursor                                    |
| 76  | 256505_at   | 204  | 1.4 | 1.0  | 1.1  | 201  | 1.1 | 2.5 | 3.1  | AT1G75200 | flavodoxin family                                                   |
| 77  | 255011_at   | 903  | 2.3 | 3.0  | 2.4  | 509  | 1.1 | 2.5 | 5.0  | AT4G10040 | cytochrome c                                                        |
| 78  | 260568_at   | 141  | 1.4 | 1.4  | 1.0  | 211  | 1.1 | 2.5 | 8.6  | AT2G43570 | glycosyl hydrolase family 19 (chitinase)                            |
| 79  | 256416_at   | 85   | 1.6 | 1.5  | 1.2  | 80   | 1.3 | 2.5 | 2.7  | AT3G11050 | ferritin subunit -related                                           |
| 80  | 264400_at   | 3838 | 1.2 | 1.6  | 1.0  | 966  | 1.2 | 2.5 | 4.8  | AT1G61800 | glucose-6-phosphate/phosphate-translocator, putative                |
| 81  | 267411_at   | 598  | 1.3 | 1.7  | 1.5  | 102  | 0.7 | 2.5 | 12.0 | AT2G34930 | disease resistance protein family                                   |
| 82  | 265197_at   | 125  | 6.1 | 7.9  | 4.5  | 113  | 1.3 | 2.5 | 3.7  | AT2G36750 | UDP-glycosyltransferase family                                      |
| 83  | 248436_at   | 679  | 1.7 | 1.6  | 1.3  | 456  | 1.0 | 2.5 | 2.6  | AT5G51220 | expressed protein                                                   |
| 84  | 253776_at   | 348  | 1.0 | 1.0  | 1.2  | 219  | 1.1 | 2.5 | 6.1  | AT4G28390 | mitochondrial ADP,ATP carrier protein, putative                     |
| 85  | 258815_at   | 189  | 1.0 | 1.6  | 1.5  | 138  | 1.8 | 2.5 | 2.2  | AT3G04000 | short-chain type dehydrogenase/reductase -related                   |
| 86  | 251282_at   | 131  | 3.1 | 6.9  | 6.0  | 70   | 0.9 | 2.4 | 8.0  | AT3G61630 | AP2 domain transcription factor, putative                           |
| 87  | 250087_at   | 103  | 0.9 | 0.8  | 0.9  | 119  | 0.7 | 2.4 | 2.7  | AT5G17270 | tetratricopeptide repeat (TPR)-containing protein                   |
| 88  | 258926_s_at | 205  | 1.5 | 1.6  | 1.1  | 184  | 1.3 | 2.4 | 4.5  | AT3G10490 | expressed protein                                                   |
| 89  | 247176_at   | 748  | 0.9 | 1.2  | 1.4  | 435  | 1.4 | 2.4 | 5.2  | AT5G65110 | acyl-CoA oxidase (gb AAC13497.1)                                    |
| 90  | 266532_at   | 211  | 1.5 | 2.1  | 0.9  | 146  | 1.4 | 2.4 | 3.6  | AT2G16890 | glycosyltransferase family                                          |
| 91  | 247615_at   | 39   | 2.0 | 1.3  | 1.1  | 56   | 1.2 | 2.4 | 6.2  | AT5G60250 | hypothetical protein                                                |
| 92  | 248101_at   | 342  | 1.2 | 1.7  | 1.4  | 446  | 1.1 | 2.4 | 4.4  | AT5G55200 | chaperone GrpE-related protein                                      |
| 93  | 262626_at   | 2275 | 2.9 | 2.1  | 1.1  | 909  | 1.1 | 2.3 | 2.5  | AT1G06430 | FtsH protease, putative                                             |
| 94  | 245437_at   | 90   | 1.1 | 1.2  | 0.8  | 103  | 1.0 | 2.3 | 2.5  | AT4G16630 | DEAD/DEAH box helicase, putative                                    |
| 95  | 262118_at   | 835  | 1.1 | 1.2  | 1.1  | 1342 | 1.1 | 2.3 | 2.8  | AT1G02850 | glycosyl hydrolase family 1                                         |
| 96  | 250196_at   | 58   | 1.3 | 1.5  | 1.2  | 124  | 0.9 | 2.3 | 2.6  | AT5G14580 | polynucleotide phosphorylase                                        |
| 97  | 254869_at   | 54   | 1.1 | 2.7  | 3.1  | 86   | 0.7 | 2.3 | 21.5 | AT4G11890 | protein kinase family                                               |
| 98  | 265147_at   | 99   | 1.3 | 1.1  | 1.4  | 157  | 0.9 | 2.3 | 3.4  | AT1G51380 | eukaryotic translation initiation factor 4A (eIF-4A), putative      |
| 99  | 245879_at   | 123  | 1.3 | 1.2  | 1.3  | 157  | 1.0 | 2.3 | 5.5  | AT5G09420 | subunit of TOC complex -related                                     |
| 100 | 245052_at   | 732  | 1.0 | 1.0  | 0.9  | 353  | 1.0 | 2.3 | 11.3 | AT2G26440 | pectinesterase family                                               |
| 101 | 249796_at   | 1556 | 1.1 | 0.9  | 0.9  | 1278 | 1.1 | 2.3 | 2.9  | AT5G23540 | 26S proteasome regulatory subunit (RPN11), putative                 |
| 102 | 249494_at   | 358  | 2.0 | 3.3  | 2.4  | 337  | 1.1 | 2.3 | 8.9  | AT5G39050 | transferase family                                                  |
| 103 | 249125_at   | 871  | 1.1 | 2.1  | 2.2  | 676  | 1.1 | 2.3 | 5.7  | AT5G43450 | 2-oxoglutarate-dependent dioxygenase, putative                      |
| 104 | 256854_at   | 249  | 1.1 | 1.3  | 1.1  | 252  | 1.0 | 2.3 | 2.9  | AT3G15180 | expressed protein                                                   |

|            |             |      |     |      |      |      |     |     |      |           |                                                                     |
|------------|-------------|------|-----|------|------|------|-----|-----|------|-----------|---------------------------------------------------------------------|
| <b>105</b> | 256057_at   | 695  | 1.2 | 1.3  | 1.5  | 152  | 1.4 | 2.3 | 2.7  | AT1G07180 | NADH dehydrogenase family                                           |
| <b>106</b> | 257149_at   | 476  | 1.0 | 1.2  | 1.3  | 770  | 0.8 | 2.3 | 4.4  | AT3G27280 | prohibitin -related                                                 |
| <b>107</b> | 264657_at   | 189  | 0.9 | 0.8  | 1.0  | 236  | 1.0 | 2.3 | 3.0  | AT1G09100 | 26S protease regulatory subunit 6A                                  |
| <b>108</b> | 264674_at   | 527  | 1.2 | 1.4  | 1.4  | 500  | 0.9 | 2.2 | 5.6  | AT1G09815 | expressed protein                                                   |
| <b>109</b> | 248440_at   | 273  | 1.4 | 1.9  | 1.5  | 145  | 1.5 | 2.2 | 8.9  | AT5G51260 | acid phosphatase                                                    |
| <b>110</b> | 264912_at   | 74   | 1.9 | 2.2  | 0.9  | 55   | 1.5 | 2.2 | 6.0  | AT1G60750 | aldo/keto reductase family                                          |
| <b>111</b> | 264637_at   | 170  | 1.2 | 1.0  | 1.0  | 240  | 1.2 | 2.2 | 1.8  | AT1G65560 | allyl alcohol dehydrogenase, putative                               |
| <b>112</b> | 261192_at   | 278  | 4.2 | 7.7  | 4.7  | 210  | 1.0 | 2.2 | 10.2 | AT1G32870 | NAM protein -related                                                |
| <b>113</b> | 259751_at   | 2006 | 1.0 | 1.1  | 1.9  | 328  | 1.6 | 2.2 | 3.1  | AT1G71030 | myb family transcription factor                                     |
| <b>114</b> | 257487_at   | 184  | 1.3 | 1.6  | 1.3  | 155  | 1.0 | 2.2 | 3.3  | AT1G71850 | hypothetical protein                                                |
| <b>115</b> | 256249_at   | 399  | 1.0 | 0.9  | 1.0  | 395  | 1.2 | 2.2 | 2.1  | AT3G11270 | 26S proteasome regulatory subunit S12 (RPN8), putative              |
| <b>116</b> | 267083_at   | 1812 | 2.0 | 6.3  | 7.6  | 777  | 1.1 | 2.2 | 11.4 | AT2G41100 | calmodulin-related protein 3, touch-induced (TCH3)                  |
| <b>117</b> | 247989_at   | 1567 | 1.3 | 1.7  | 1.3  | 1528 | 1.1 | 2.2 | 4.3  | AT5G56350 | pyruvate kinase, putative                                           |
| <b>118</b> | 265154_at   | 160  | 1.6 | 1.1  | 1.1  | 162  | 0.7 | 2.2 | 3.5  | AT1G30960 | GTP-binding protein, ERG -related                                   |
| <b>119</b> | 254818_at   | 8571 | 1.1 | 1.0  | 1.1  | 3350 | 1.0 | 2.2 | 2.5  | AT4G12470 | protease inhibitor/seed storage/lipid transfer protein (LTP) family |
| <b>120</b> | 246189_at   | 341  | 1.3 | 1.4  | 1.2  | 338  | 1.0 | 2.2 | 6.2  | AT5G20910 | C3HC4-type zinc finger protein family                               |
| <b>121</b> | 247655_at   | 274  | 4.2 | 12.2 | 13.1 | 203  | 1.2 | 2.2 | 7.6  | AT5G59820 | zinc finger protein Zat12                                           |
| <b>122</b> | 258452_at   | 1943 | 2.2 | 4.0  | 3.1  | 1149 | 1.2 | 2.2 | 6.9  | AT3G22370 | alternative oxidase 1a, mitochondrial (AOX1A)                       |
| <b>123</b> | 249233_at   | 756  | 1.4 | 1.4  | 1.1  | 598  | 1.0 | 2.2 | 3.6  | AT5G42150 | expressed protein                                                   |
| <b>124</b> | 254593_s_at | 313  | 1.1 | 0.7  | 0.8  | 256  | 1.1 | 2.2 | 2.5  | AT4G18900 | transducin / WD-40 repeat protein family                            |
| <b>125</b> | 262607_at   | 1044 | 1.0 | 1.3  | 1.3  | 435  | 1.0 | 2.2 | 6.2  | AT1G13990 | expressed protein                                                   |
| <b>126</b> | 250934_at   | 1027 | 1.0 | 1.2  | 1.3  | 1212 | 1.0 | 2.2 | 5.5  | AT5G03030 | DnaJ domain-containing protein                                      |
| <b>127</b> | 246122_at   | 524  | 1.3 | 1.7  | 1.2  | 275  | 1.3 | 2.2 | 2.2  | AT5G20380 | hypothetical protein                                                |
| <b>128</b> | 258996_at   | 214  | 1.2 | 1.3  | 1.7  | 256  | 1.1 | 2.2 | 3.5  | AT3G01800 | ribosome recycling factor -related                                  |
| <b>129</b> | 254447_at   | 917  | 2.0 | 2.4  | 1.9  | 512  | 1.1 | 2.2 | 5.9  | AT4G20860 | FAD-linked oxidoreductase family                                    |
| <b>130</b> | 253879_s_at | 980  | 2.0 | 1.7  | 0.9  | 798  | 1.6 | 2.1 | 3.0  | AT4G27570 | glycosyltransferase family                                          |
| <b>131</b> | 248062_at   | 290  | 1.2 | 1.5  | 1.8  | 212  | 0.5 | 2.1 | 7.6  | AT5G55450 | protease inhibitor/seed storage/lipid transfer protein (LTP) family |
| <b>132</b> | 248442_at   | 480  | 1.0 | 1.0  | 0.8  | 307  | 1.1 | 2.1 | 4.9  | AT5G51280 | DEAD-box protein abstrakt, putative                                 |
| <b>133</b> | 259297_at   | 72   | 1.6 | 3.3  | 2.6  | 94   | 1.4 | 2.1 | 12.3 | AT3G05360 | disease resistance protein family (LRR)                             |
| <b>134</b> | 248326_at   | 564  | 1.1 | 1.2  | 0.9  | 514  | 1.0 | 2.1 | 3.5  | AT5G52820 | Notchless protein homolog                                           |
| <b>135</b> | 248462_at   | 934  | 1.2 | 1.1  | 1.0  | 705  | 1.0 | 2.1 | 4.4  | AT5G50960 | nucleotide-binding protein                                          |
| <b>136</b> | 252864_at   | 154  | 1.2 | 1.5  | 0.9  | 133  | 1.2 | 2.1 | 4.6  | AT4G39740 | expressed protein                                                   |
| <b>137</b> | 249983_at   | 429  | 1.9 | 4.0  | 4.3  | 297  | 0.9 | 2.1 | 8.5  | AT5G18470 | expressed protein                                                   |
| <b>138</b> | 249481_at   | 100  | 1.1 | 1.6  | 1.3  | 125  | 0.8 | 2.1 | 10.4 | AT5G38900 | frnE protein - like                                                 |
| <b>139</b> | 248984_at   | 186  | 1.1 | 0.9  | 1.2  | 289  | 1.1 | 2.1 | 1.9  | AT5G45140 | DNA-directed RNA polymerase subunit                                 |
| <b>140</b> | 247851_at   | 5724 | 1.2 | 1.1  | 1.0  | 2464 | 1.1 | 2.1 | 3.1  | AT5G58070 | outer membrane lipo protein - like                                  |

|            |           |      |     |      |      |      |     |     |      |           |                                                      |
|------------|-----------|------|-----|------|------|------|-----|-----|------|-----------|------------------------------------------------------|
| <b>141</b> | 264924_at | 128  | 0.9 | 0.9  | 0.6  | 102  | 1.0 | 2.1 | 3.2  | AT1G60620 | RNA polymerase subunit                               |
| <b>142</b> | 261648_at | 217  | 2.4 | 21.5 | 34.1 | 159  | 1.2 | 2.1 | 13.0 | AT1G27730 | salt-tolerance zinc finger protein                   |
| <b>143</b> | 264102_at | 1582 | 2.0 | 1.7  | 0.8  | 423  | 1.4 | 2.1 | 3.4  | AT1G79270 | expressed protein                                    |
| <b>144</b> | 260266_at | 238  | 0.8 | 1.0  | 1.8  | 598  | 1.0 | 2.1 | 1.1  | AT1G68520 | CONSTANS B-box zinc finger family protein            |
| <b>145</b> | 263847_at | 222  | 1.4 | 1.4  | 0.8  | 251  | 1.3 | 2.1 | 1.5  | AT2G36970 | UDP-glycosyltransferase family                       |
| <b>146</b> | 251503_at | 153  | 1.2 | 1.1  | 1.1  | 315  | 1.2 | 2.1 | 1.3  | AT3G59140 | ABC transporter family protein                       |
| <b>147</b> | 262943_at | 350  | 1.1 | 0.7  | 0.6  | 256  | 0.9 | 2.1 | 2.4  | AT1G79470 | inosine-5'-monophosphate dehydrogenase               |
| <b>148</b> | 265290_at | 150  | 1.6 | 1.2  | 0.7  | 78   | 1.4 | 2.1 | 5.7  | AT2G22590 | glycosyltransferase family                           |
| <b>149</b> | 251984_at | 1141 | 1.8 | 1.8  | 1.7  | 842  | 1.3 | 2.1 | 1.5  | AT3G53260 | phenylalanine ammonia-lyase (PAL2)                   |
| <b>150</b> | 255278_at | 202  | 1.2 | 1.0  | 0.9  | 270  | 0.8 | 2.1 | 2.5  | AT4G04940 | transducin / WD-40 repeat protein family             |
| <b>151</b> | 259561_at | 132  | 2.4 | 4.0  | 2.1  | 107  | 0.8 | 2.1 | 21.0 | AT1G21250 | wall-associated kinase 1                             |
| <b>152</b> | 267523_at | 1603 | 1.0 | 1.2  | 1.6  | 599  | 1.4 | 2.1 | 2.5  | AT2G30600 | POZ domain protein family                            |
| <b>153</b> | 245885_at | 1357 | 1.2 | 1.2  | 0.9  | 982  | 1.1 | 2.1 | 4.7  | AT5G09440 | expressed protein                                    |
| <b>154</b> | 265387_at | 205  | 1.3 | 2.4  | 2.5  | 108  | 1.2 | 2.0 | 4.3  | AT2G20670 | expressed protein                                    |
| <b>155</b> | 246302_at | 230  | 0.9 | 1.5  | 1.6  | 828  | 1.1 | 2.0 | 3.5  | AT3G51860 | cation exchanger, putative (CAX3)                    |
| <b>156</b> | 265259_at | 510  | 1.0 | 1.1  | 1.0  | 411  | 1.1 | 2.0 | 3.9  | AT2G20330 | transducin / WD-40 repeat protein family             |
| <b>157</b> | 250502_at | 1214 | 1.3 | 0.8  | 0.7  | 1216 | 0.9 | 2.0 | 3.0  | AT5G09590 | heat shock protein mtHsc70-2 (Hsc70-5)               |
| <b>158</b> | 250971_at | 2196 | 1.1 | 0.8  | 0.9  | 220  | 1.2 | 2.0 | 3.9  | AT5G02810 | pseudo-response regulator, APRR7 (APRR1/TOC1 family) |
| <b>159</b> | 252946_at | 207  | 1.0 | 1.1  | 1.2  | 140  | 1.2 | 2.0 | 2.5  | AT4G39235 | expressed protein                                    |
| <b>160</b> | 248910_at | 1272 | 2.5 | 1.3  | 1.4  | 80   | 1.4 | 2.0 | 5.5  | AT5G45820 | CBL-interacting protein kinase 20                    |
| <b>161</b> | 258957_at | 1415 | 1.2 | 1.3  | 0.6  | 1009 | 1.1 | 2.0 | 2.2  | AT3G01420 | feebly-related protein                               |
| <b>162</b> | 263268_at | 49   | 2.3 | 3.0  | 2.6  | 104  | 0.9 | 2.0 | 0.9  | AT2G16590 | expressed protein                                    |
| <b>163</b> | 255543_at | 1163 | 1.4 | 3.7  | 3.0  | 839  | 0.9 | 2.0 | 6.9  | AT4G01870 | expressed protein                                    |
| <b>164</b> | 259037_at | 876  | 1.1 | 0.8  | 0.6  | 318  | 1.2 | 2.0 | 5.3  | AT3G09350 | expressed protein                                    |
| <b>165</b> | 266471_at | 412  | 1.0 | 0.9  | 0.9  | 581  | 1.0 | 2.0 | 2.3  | AT2G31060 | GTP-binding protein -related                         |

Fold induction for 305-1h is averaged from four independent ATH-1 array hybridizations, all others from two independent array hybridizations. Applied threshold is 2-fold. Annotation June 15, 2003.
