# Supplementary material
Source: PubMed Central journal article supplement (PMC337064)
Supplement: pnas_0308044100_10.pdf [file pnas_0308044100_10.pdf]

**Table 10. 295\_6hr\_decrease**

|           | Probe set | Fold induction             |         |         |            | Fold induction             |         |         |            | Identifier |                                                                      |
|-----------|-----------|----------------------------|---------|---------|------------|----------------------------|---------|---------|------------|------------|----------------------------------------------------------------------|
|           |           | Expression level (327, 1h) | 305, 1h | 295, 1h | quartz, 1h | Expression level (327, 1h) | 305, 6h | 295, 6h | quartz, 6h |            |                                                                      |
| <b>1</b>  | 266222_at | 29                         | 1.3     | 0.9     | 2.0        | 36                         | 1.7     | 0.1     | 0.1        | AT2G28780  | expressed protein                                                    |
| <b>2</b>  | 254550_at | 192                        | 0.4     | 0.3     | 0.2        | 1412                       | 0.7     | 0.1     | 0.0        | AT4G19690  | iron-regulated transporter (IRT1)                                    |
| <b>3</b>  | 247425_at | 53                         | 2.8     | 1.0     | 0.6        | 67                         | 0.6     | 0.1     | 0.1        | AT5G62550  | expressed protein                                                    |
| <b>4</b>  | 258498_at | 9                          | 4.8     | 6.0     | 5.6        | 141                        | 1.5     | 0.2     | 0.3        | AT3G02480  | expressed protein                                                    |
| <b>5</b>  | 251545_at | 184                        | 0.8     | 0.9     | 0.6        | 538                        | 0.8     | 0.3     | 0.3        | AT3G58810  | zinc transporter, putative/metal tolerance protein, putative (MTPa2) |
| <b>6</b>  | 246273_at | 12                         | 2.2     | 0.6     | 2.0        | 215                        | 1.3     | 0.3     | 0.0        | AT4G36700  | cupin domain-containing protein                                      |
| <b>7</b>  | 262260_at | 2406                       | 1.0     | 0.9     | 0.5        | 3185                       | 1.0     | 0.3     | 0.1        | AT1G70850  | Bet v I allergen family                                              |
| <b>8</b>  | 266353_at | 2170                       | 1.1     | 1.0     | 0.9        | 2632                       | 0.7     | 0.3     | 0.1        | AT2G01520  | major latex protein (MLP)-related                                    |
| <b>9</b>  | 254233_at | 654                        | 0.9     | 0.6     | 0.8        | 708                        | 0.8     | 0.3     | 0.1        | AT4G23800  | 98b like protein                                                     |
| <b>10</b> | 253480_at | 562                        | 0.9     | 0.8     | 0.9        | 600                        | 0.8     | 0.3     | 0.2        | AT4G31840  | plastocyanin-like domain containing protein                          |
| <b>11</b> | 246603_at | 99                         | 1.1     | 0.9     | 0.8        | 362                        | 0.8     | 0.3     | 0.1        | AT1G31690  | copper amine oxidase -related                                        |
| <b>12</b> | 258480_at | 498                        | 1.1     | 1.0     | 1.1        | 656                        | 0.8     | 0.3     | 0.2        | AT3G02640  | expressed protein                                                    |
| <b>13</b> | 253301_at | 636                        | 0.4     | 0.3     | 0.3        | 340                        | 0.4     | 0.3     | 0.8        | AT4G33720  | pathogenesis-related protein, putative                               |
| <b>14</b> | 265099_at | 29                         | 4.3     | 2.7     | 1.9        | 139                        | 1.8     | 0.3     | 0.2        | AT1G03990  | alcohol oxidase-related                                              |
| <b>15</b> | 261226_at | 1891                       | 0.5     | 0.3     | 0.4        | 1196                       | 1.1     | 0.3     | 0.3        | AT1G20190  | expansin, putative (EXP11)                                           |
| <b>16</b> | 247684_at | 22                         | 2.9     | 0.9     | 0.3        | 171                        | 1.4     | 0.3     | 0.3        | AT5G59670  | leucine rich repeat protein kinase, putative                         |
| <b>17</b> | 247304_at | 792                        | 1.0     | 0.7     | 1.1        | 839                        | 0.7     | 0.3     | 0.4        | AT5G63850  | amino acid transporter 4 (AAP4)                                      |
| <b>18</b> | 248526_at | 268                        | 0.6     | 0.5     | 0.6        | 310                        | 0.8     | 0.3     | 0.1        | AT5G50730  | hypothetical protein                                                 |
| <b>19</b> | 247134_at | 148                        | 1.2     | 1.0     | 1.0        | 154                        | 1.1     | 0.3     | 0.3        | AT5G66230  | expressed protein                                                    |
| <b>20</b> | 255822_at | 1515                       | 0.6     | 0.9     | 1.2        | 501                        | 0.9     | 0.3     | 0.6        | AT2G40610  | expansin, putative (EXP8)                                            |
| <b>21</b> | 265665_at | 279                        | 3.1     | 2.8     | 1.0        | 298                        | 0.9     | 0.3     | 0.3        | AT2G27420  | cysteine proteinase                                                  |
| <b>22</b> | 260831_at | 436                        | 0.9     | 1.0     | 2.1        | 972                        | 0.8     | 0.3     | 0.5        | AT1G06830  | glutaredoxin protein family                                          |
| <b>23</b> | 251677_at | 668                        | 0.7     | 0.6     | 0.3        | 2560                       | 1.3     | 0.3     | 0.1        | AT3G56980  | bHLH protein family                                                  |
| <b>24</b> | 245343_at | 261                        | 1.0     | 0.8     | 1.1        | 366                        | 0.8     | 0.4     | 0.2        | AT4G15830  | expressed protein                                                    |
| <b>25</b> | 247814_at | 350                        | 1.1     | 0.9     | 0.8        | 1593                       | 1.0     | 0.4     | 0.1        | AT5G58310  | hydrolase, alpha/beta fold family                                    |
| <b>26</b> | 264802_at | 561                        | 1.2     | 1.0     | 1.0        | 555                        | 0.9     | 0.4     | 0.2        | AT1G08560  | syntaxin of plants SYP111 (KNOLLE)                                   |
| <b>27</b> | 248057_at | 111                        | 1.0     | 0.9     | 1.1        | 106                        | 0.7     | 0.4     | 0.3        | AT5G55520  | hypothetical protein                                                 |
| <b>28</b> | 246142_at | 172                        | 0.8     | 0.6     | 0.5        | 201                        | 0.7     | 0.4     | 0.3        | AT5G19970  | hypothetical protein                                                 |
| <b>29</b> | 245148_at | 538                        | 0.7     | 0.7     | 0.6        | 354                        | 1.1     | 0.4     | 0.5        | AT2G45220  | pectinesterase family                                                |
| <b>30</b> | 266007_at | 147                        | 0.7     | 0.7     | 0.7        | 191                        | 0.8     | 0.4     | 0.3        | AT2G37380  | expressed protein                                                    |
| <b>31</b> | 251466_at | 74                         | 1.2     | 0.6     | 0.5        | 131                        | 1.4     | 0.4     | 0.2        | AT3G59340  | expressed protein                                                    |

|    |             |      |     |      |      |      |     |     |     |           |                                                                     |
|----|-------------|------|-----|------|------|------|-----|-----|-----|-----------|---------------------------------------------------------------------|
| 32 | 255460_at   | 134  | 0.8 | 0.7  | 1.0  | 148  | 0.9 | 0.4 | 0.0 | AT4G02800 | expressed protein                                                   |
| 33 | 258859_at   | 247  | 1.1 | 0.8  | 1.1  | 268  | 0.7 | 0.4 | 0.3 | AT3G02120 | expressed protein                                                   |
| 34 | 253957_at   | 381  | 1.1 | 1.1  | 0.9  | 564  | 1.0 | 0.4 | 0.2 | AT4G26320 | arabinogalactan-protein (AGP13)                                     |
| 35 | 252163_at   | 24   | 1.4 | 0.9  | 0.9  | 131  | 1.1 | 0.4 | 0.3 | AT3G50610 | hypothetical protein                                                |
| 36 | 252248_at   | 156  | 0.9 | 0.8  | 0.8  | 190  | 0.9 | 0.4 | 0.5 | AT3G49750 | leucine rich repeat protein family                                  |
| 37 | 248413_at   | 330  | 1.0 | 0.7  | 0.7  | 290  | 0.7 | 0.4 | 0.2 | AT5G51600 | microtubule associated protein (MAP65/ASE1) family                  |
| 38 | 250228_at   | 189  | 1.2 | 1.2  | 1.4  | 253  | 0.9 | 0.4 | 0.1 | AT5G13840 | cell cycle switch protein                                           |
| 39 | 248691_at   | 191  | 0.9 | 1.0  | 0.7  | 236  | 0.8 | 0.4 | 0.2 | AT5G48310 | hypothetical protein                                                |
| 40 | 245816_at   | 166  | 1.0 | 0.8  | 0.6  | 195  | 0.6 | 0.4 | 0.3 | AT1G26210 | expressed protein                                                   |
| 41 | 248807_at   | 393  | 1.0 | 0.8  | 1.0  | 849  | 0.8 | 0.4 | 0.1 | AT5G47500 | pectinesterase family                                               |
| 42 | 250980_at   | 27   | 8.1 | 14.5 | 15.3 | 109  | 1.0 | 0.4 | 0.1 | AT5G03130 | hypothetical protein                                                |
| 43 | 249383_at   | 380  | 0.7 | 0.4  | 0.3  | 130  | 1.1 | 0.4 | 0.4 | AT5G39860 | bHLH protein                                                        |
| 44 | 254820_s_at | 2225 | 0.9 | 0.7  | 0.5  | 2726 | 1.0 | 0.4 | 0.1 | AT4G12510 | protease inhibitor/seed storage/lipid transfer protein (LTP) family |
| 45 | 259640_at   | 749  | 1.1 | 0.7  | 0.7  | 826  | 0.9 | 0.4 | 0.3 | AT1G52400 | glycosyl hydrolase family 1, beta-glucosidase (BG1)                 |
| 46 | 266162_at   | 139  | 0.9 | 1.0  | 0.7  | 227  | 0.7 | 0.4 | 0.3 | AT2G28160 | bHLH protein family                                                 |
| 47 | 246687_at   | 329  | 0.9 | 0.8  | 0.3  | 767  | 1.0 | 0.4 | 0.1 | AT5G33370 | GDSL-motif lipase/hydrolase protein                                 |
| 48 | 249375_at   | 2106 | 0.8 | 1.0  | 0.7  | 2177 | 1.0 | 0.4 | 0.2 | AT5G40730 | arabinogalactan-protein (AGP24)                                     |
| 49 | 246149_at   | 1013 | 0.6 | 0.5  | 0.4  | 957  | 0.8 | 0.4 | 0.2 | AT5G19890 | peroxidase, putative                                                |
| 50 | 254907_at   | 30   | 1.7 | 0.6  | 0.4  | 291  | 0.9 | 0.4 | 0.0 | AT4G11190 | disease resistance response protein family/ dirigent protein family |
| 51 | 253340_s_at | 486  | 0.9 | 0.7  | 0.7  | 504  | 0.8 | 0.4 | 0.4 | AT4G33260 | WD-40 repeat protein family                                         |
| 52 | 262109_at   | 602  | 1.0 | 0.7  | 0.8  | 669  | 0.7 | 0.4 | 0.2 | AT1G02730 | cellulose synthase family                                           |
| 53 | 246920_at   | 127  | 1.1 | 0.7  | 0.9  | 205  | 0.6 | 0.4 | 0.3 | AT5G25090 | plastocyanin-like domain containing protein                         |
| 54 | 259813_at   | 259  | 0.8 | 0.5  | 0.4  | 919  | 0.7 | 0.4 | 0.1 | AT1G49860 | glutathione transferase, putative                                   |
| 55 | 246797_at   | 101  | 0.8 | 0.7  | 0.6  | 197  | 0.8 | 0.4 | 0.2 | AT5G26790 | expressed protein                                                   |
| 56 | 247962_at   | 139  | 1.1 | 1.0  | 1.6  | 184  | 0.7 | 0.4 | 0.4 | AT5G56580 | mitogen-activated protein kinase kinase (MAPKK), putative (MKK6)    |
| 57 | 261660_at   | 220  | 1.0 | 0.8  | 1.1  | 241  | 0.9 | 0.4 | 0.3 | AT1G18370 | kinesin heavy chain isolog -related                                 |
| 58 | 256832_at   | 322  | 1.2 | 1.1  | 1.1  | 318  | 0.8 | 0.4 | 0.2 | AT3G22880 | meiotic recombination protein (AtDMC1)                              |
| 59 | 259978_at   | 300  | 1.1 | 0.9  | 0.9  | 362  | 1.0 | 0.4 | 0.2 | AT1G76540 | cell division control protein, putative                             |
| 60 | 248844_s_at | 2399 | 0.9 | 0.8  | 0.9  | 2529 | 1.0 | 0.4 | 0.3 | AT5G46900 | protease inhibitor/seed storage/lipid transfer protein (LTP) family |
| 61 | 267359_at   | 150  | 1.0 | 0.9  | 1.2  | 266  | 0.8 | 0.4 | 0.4 | AT2G40020 | expressed protein                                                   |
| 62 | 264377_at   | 499  | 1.1 | 1.3  | 0.9  | 651  | 0.8 | 0.4 | 0.2 | AT2G25060 | similar to early nodulins                                           |
| 63 | 253403_at   | 303  | 1.4 | 1.0  | 1.2  | 400  | 0.8 | 0.4 | 0.3 | AT4G32830 | protein kinase, putative                                            |
| 64 | 256799_at   | 141  | 1.0 | 1.3  | 1.3  | 268  | 0.7 | 0.4 | 0.7 | AT3G18560 | expressed protein                                                   |
| 65 | 251142_at   | 397  | 1.2 | 0.9  | 1.0  | 551  | 0.9 | 0.4 | 0.2 | AT5G01015 | expressed protein                                                   |

|     |             |      |     |     |     |      |     |     |     |           |                                                             |
|-----|-------------|------|-----|-----|-----|------|-----|-----|-----|-----------|-------------------------------------------------------------|
| 66  | 250968_at   | 444  | 0.7 | 0.4 | 0.4 | 551  | 1.0 | 0.4 | 0.1 | AT5G02890 | transferase family                                          |
| 67  | 245546_at   | 129  | 1.0 | 0.9 | 0.9 | 245  | 0.9 | 0.4 | 0.3 | AT4G15290 | cellulose synthase - related                                |
| 68  | 257005_at   | 318  | 1.0 | 0.9 | 1.0 | 359  | 0.9 | 0.4 | 0.3 | AT3G14190 | expressed protein                                           |
| 69  | 259120_at   | 178  | 1.6 | 1.8 | 1.1 | 232  | 0.9 | 0.4 | 0.9 | AT3G02240 | expressed protein                                           |
| 70  | 262868_at   | 2250 | 0.7 | 0.9 | 0.8 | 3022 | 1.3 | 0.4 | 0.2 | AT1G64980 | expressed protein                                           |
| 71  | 260547_at   | 2358 | 0.8 | 0.9 | 0.8 | 4402 | 0.9 | 0.4 | 0.2 | AT2G43550 | trypsin inhibitor -related                                  |
| 72  | 267339_at   | 438  | 0.6 | 0.5 | 1.0 | 479  | 1.0 | 0.4 | 0.6 | AT2G39870 | expressed protein                                           |
| 73  | 250983_at   | 50   | 0.5 | 0.7 | 2.4 | 165  | 0.4 | 0.4 | 5.4 | AT5G02780 | ln2-1 protein, putative                                     |
| 74  | 245736_at   | 657  | 1.2 | 0.8 | 0.8 | 560  | 0.9 | 0.4 | 0.2 | AT1G73330 | Dr4(protease inhibitor)                                     |
| 75  | 265265_at   | 285  | 1.1 | 1.3 | 1.0 | 321  | 1.0 | 0.4 | 0.3 | AT2G42900 | expressed protein                                           |
| 76  | 249567_at   | 575  | 1.1 | 0.9 | 0.6 | 1190 | 1.1 | 0.4 | 0.2 | AT5G38020 | S-adenosyl-L-methionine:carboxyl methyltransferase family   |
| 77  | 264751_at   | 500  | 0.7 | 0.8 | 1.0 | 1434 | 1.4 | 0.4 | 0.2 | AT1G23020 | ferric-chelate reductase, putative                          |
| 78  | 248656_at   | 306  | 1.0 | 0.6 | 0.8 | 368  | 0.9 | 0.4 | 0.2 | AT5G48460 | fimbrin 2 (gb AAB97844.1)                                   |
| 79  | 258067_at   | 180  | 1.1 | 1.0 | 0.9 | 196  | 0.9 | 0.4 | 0.3 | AT3G25980 | mitotic checkpoint protein -related                         |
| 80  | 252950_at   | 714  | 0.7 | 0.7 | 0.6 | 510  | 1.0 | 0.5 | 0.3 | AT4G38690 | expressed protein                                           |
| 81  | 261159_s_at | 130  | 0.8 | 1.0 | 0.7 | 116  | 1.1 | 0.5 | 0.6 | AT1G34460 | cyclin, putative                                            |
| 82  | 253985_at   | 318  | 0.8 | 0.8 | 0.5 | 389  | 1.1 | 0.5 | 0.4 | AT4G26220 | caffeoyl-CoA 3-O-methyltransferase, putative                |
| 83  | 249599_at   | 220  | 1.2 | 0.7 | 0.7 | 272  | 1.0 | 0.5 | 0.3 | AT5G37990 | methyltransferase-related                                   |
| 84  | 245555_at   | 1206 | 0.6 | 0.5 | 0.6 | 1965 | 1.0 | 0.5 | 0.2 | AT4G15390 | acyltransferase family                                      |
| 85  | 248270_at   | 3557 | 0.7 | 0.6 | 0.6 | 6635 | 1.1 | 0.5 | 0.2 | AT5G53450 | protein kinase family                                       |
| 86  | 260693_at   | 1487 | 0.7 | 0.5 | 1.0 | 1444 | 1.0 | 0.5 | 0.3 | AT1G32450 | peptide transporter PTR2-B -related                         |
| 87  | 245739_at   | 338  | 1.0 | 0.8 | 0.7 | 371  | 0.8 | 0.5 | 0.2 | AT1G44110 | cyclin, putative                                            |
| 88  | 263098_at   | 171  | 1.6 | 1.2 | 1.3 | 193  | 1.1 | 0.5 | 0.4 | AT2G16005 | expressed protein                                           |
| 89  | 260221_at   | 7322 | 0.8 | 1.0 | 1.3 | 2333 | 0.9 | 0.5 | 0.8 | AT1G74670 | GAST1-related protein                                       |
| 90  | 247678_at   | 1305 | 0.9 | 0.9 | 0.6 | 1911 | 1.0 | 0.5 | 0.4 | AT5G59520 | zinc transporter (ZIP2)                                     |
| 91  | 259790_s_at | 384  | 0.5 | 0.3 | 0.4 | 105  | 0.8 | 0.5 | 0.2 | AT1G29430 | auxin-induced (indole-3-acetic acid induced) protein family |
| 92  | 258552_at   | 657  | 0.7 | 0.4 | 0.5 | 471  | 0.9 | 0.5 | 0.5 | AT3G07010 | polysaccharide lyase family 1 (pectate lyase)               |
| 93  | 254221_at   | 1589 | 0.9 | 0.7 | 0.5 | 1359 | 0.9 | 0.5 | 0.2 | AT4G23820 | polygalacturonase, putative                                 |
| 94  | 244991_s_at | 509  | 0.6 | 0.6 | 0.5 | 817  | 0.9 | 0.5 | 0.2 | ATCG00890 | NADH dehydrogenase subunit 2                                |
| 95  | 253255_at   | 431  | 0.6 | 0.5 | 0.5 | 811  | 1.0 | 0.5 | 0.2 | AT4G34760 | auxin-induced (indole-3-acetic acid induced) protein family |
| 96  | 246505_at   | 382  | 1.2 | 0.9 | 0.9 | 304  | 1.0 | 0.5 | 0.3 | AT5G16250 | expressed protein                                           |
| 97  | 266419_at   | 262  | 0.8 | 0.7 | 0.4 | 250  | 1.0 | 0.5 | 0.2 | AT2G38760 | annexin -related                                            |
| 98  | 250682_x_at | 2374 | 0.6 | 0.6 | 0.3 | 2253 | 1.1 | 0.5 | 0.1 | AT5G06630 | proline-rich protein family                                 |
| 99  | 257072_at   | 1554 | 0.9 | 0.7 | 0.7 | 1814 | 0.8 | 0.5 | 0.3 | AT3G14220 | GDSL-motif lipase/hydrolase protein                         |
| 100 | 261859_at   | 547  | 1.1 | 0.8 | 0.9 | 609  | 0.7 | 0.5 | 0.4 | AT1G50490 | ubiquitin-conjugating enzyme (UBC20)                        |
| 101 | 247965_at   | 2827 | 0.8 | 0.9 | 0.8 | 2407 | 1.0 | 0.5 | 0.4 | AT5G56540 | arabinogalactan-protein (AGP14)                             |
| 102 | 247406_at   | 377  | 0.9 | 0.9 | 0.6 | 407  | 1.1 | 0.5 | 0.2 | AT5G62920 | response regulator 6 (ARR6)                                 |

|            |             |      |     |     |     |      |     |     |     |           |                                                   |
|------------|-------------|------|-----|-----|-----|------|-----|-----|-----|-----------|---------------------------------------------------|
| <b>103</b> | 266324_at   | 364  | 0.7 | 0.6 | 0.6 | 383  | 0.8 | 0.5 | 0.3 | AT2G46710 | rac GTPase activating protein -related            |
| <b>104</b> | 264482_at   | 272  | 0.7 | 0.9 | 1.1 | 176  | 1.1 | 0.5 | 0.8 | AT1G77210 | sugar transporter, putative                       |
| <b>105</b> | 257290_at   | 92   | 1.0 | 0.9 | 1.0 | 113  | 0.6 | 0.5 | 0.2 | AT3G15560 | expressed protein                                 |
| <b>106</b> | 262312_at   | 2743 | 0.9 | 0.7 | 0.5 | 2989 | 1.0 | 0.5 | 0.2 | AT1G70830 | Bet v I allergen family                           |
| <b>107</b> | 261684_at   | 2113 | 0.7 | 0.5 | 0.2 | 4000 | 1.2 | 0.5 | 0.2 | AT1G47400 | hypothetical protein                              |
| <b>108</b> | 244989_s_at | 192  | 0.6 | 0.6 | 0.6 | 258  | 1.0 | 0.5 | 0.3 | ATCG00860 | ycf2                                              |
| <b>109</b> | 252077_at   | 126  | 1.1 | 1.0 | 1.6 | 181  | 1.0 | 0.5 | 0.5 | AT3G51720 | expressed protein                                 |
| <b>110</b> | 255236_at   | 303  | 1.1 | 0.9 | 1.1 | 310  | 0.9 | 0.5 | 0.3 | AT4G05520 | calcium-binding EF-hand family protein            |
| <b>111</b> | 247100_at   | 96   | 1.0 | 1.3 | 1.4 | 158  | 0.9 | 0.5 | 0.3 | AT5G66520 | pentatricopeptide (PPR) repeat-containing protein |
| <b>112</b> | 262218_at   | 199  | 0.8 | 0.7 | 0.5 | 591  | 0.9 | 0.5 | 0.3 | AT1G74760 | hypothetical protein                              |
| <b>113</b> | 251427_at   | 698  | 0.9 | 0.8 | 0.8 | 670  | 0.9 | 0.5 | 0.4 | AT3G60130 | glycosyl hydrolase family 1                       |
| <b>114</b> | 249817_at   | 770  | 0.9 | 0.6 | 0.5 | 1397 | 1.2 | 0.5 | 0.2 | AT5G23820 | expressed protein                                 |

Fold induction for 305-1h is averaged from four independent ATH-1 array hybridizations, all others from two independent array hybridizations. Applied threshold is 2-fold. Annotation June 15, 2003.
