# Supplementary material
Source: PubMed Central journal article supplement (PMC337064)
Supplement: pnas_0308044100_11.pdf [file pnas_0308044100_11.pdf]

**Table 11. Quartz\_6hr\_increase**

|    | Probe set | Fold induction             |         |         |            | Fold induction             |         |         |            | Identifier |                                                                             |
|----|-----------|----------------------------|---------|---------|------------|----------------------------|---------|---------|------------|------------|-----------------------------------------------------------------------------|
|    |           | Expression level (327, 1h) | 305, 1h | 295, 1h | quartz, 1h | Expression level (327, 1h) | 305, 6h | 295, 6h | quartz, 6h |            |                                                                             |
| 1  | 254059_at | 573                        | 1.1     | 0.3     | 0.4        | 21                         | 4.7     | 106.3   | 674.6      | AT4G25200  | mitochondrion-localized small heat shock protein                            |
| 2  | 246405_at | 6                          | 3.9     | 18.5    | 58.3       | 9                          | 2.2     | 7.9     | 270.8      | AT1G57630  | disease resistance protein (TIR class), putative                            |
| 3  | 259385_at | 19                         | 4.3     | 3.0     | 2.9        | 9                          | 0.8     | 5.9     | 207.8      | AT1G13470  | expressed protein                                                           |
| 4  | 250286_at | 5                          | 1.3     | 0.8     | 2.6        | 3                          | 0.9     | 2.5     | 200.1      | AT5G13320  | auxin-responsive - like protein                                             |
| 5  | 258947_at | 27                         | 1.1     | 30.3    | 65.9       | 16                         | 4.8     | 9.9     | 199.9      | AT3G01830  | calmodulin-related protein, putative                                        |
| 6  | 255941_at | 51                         | 1.8     | 4.9     | 10.0       | 5                          | 5.2     | 34.2    | 170.4      | AT1G20350  | mitochondrial inner membrane translocase component -related                 |
| 7  | 257994_at | 3                          | 1.9     | 1.4     | 4.4        | 6                          | 0.7     | 15.8    | 124.3      | AT3G19920  | expressed protein                                                           |
| 8  | 256012_at | 9                          | 0.3     | 1.2     | 1.4        | 6                          | 1.0     | 5.4     | 121.1      | AT1G19250  | flavin-containing monooxygenase (FMO) family                                |
| 9  | 252345_at | 27                         | 5.0     | 9.9     | 27.7       | 37                         | 4.1     | 12.9    | 120.0      | AT3G48640  | hypothetical protein                                                        |
| 10 | 256989_at | 6                          | 3.7     | 14.3    | 26.0       | 2                          | 7.2     | 1.4     | 119.8      | AT3G28580  | AAA-type ATPase family                                                      |
| 11 | 267026_at | 9                          | 3.8     | 3.5     | 33.0       | 21                         | 1.5     | 10.0    | 113.8      | AT2G38340  | AP2 domain transcription factor, putative (DREB2)                           |
| 12 | 247573_at | 18                         | 8.3     | 12.4    | 13.9       | 3                          | 1.7     | 14.3    | 106.0      | AT5G61160  | transferase family                                                          |
| 13 | 259947_at | 7                          | 0.9     | 5.3     | 5.5        | 6                          | 2.2     | 15.5    | 95.8       | AT1G71530  | protein kinase -related                                                     |
| 14 | 266267_at | 49                         | 1.6     | 3.0     | 2.0        | 21                         | 2.3     | 8.3     | 85.2       | AT2G29460  | glutathione transferase, putative                                           |
| 15 | 250296_at | 896                        | 0.5     | 0.1     | 0.3        | 21                         | 7.3     | 11.4    | 78.0       | AT5G12020  | class II heat shock protein                                                 |
| 16 | 247729_at | 28                         | 3.4     | 2.5     | 1.7        | 17                         | 2.9     | 5.8     | 77.7       | AT5G59530  | 2-oxoglutarate-dependent dioxygenase, putative                              |
| 17 | 245082_at | 18                         | 1.3     | 26.7    | 84.2       | 11                         | 5.3     | 8.3     | 75.2       | AT2G23270  | expressed protein                                                           |
| 18 | 262307_at | 306                        | 0.6     | 0.3     | 0.2        | 34                         | 0.6     | 17.0    | 74.9       | AT1G71000  | DnaJ protein family                                                         |
| 19 | 261899_at | 43                         | 2.0     | 28.2    | 106.7      | 16                         | 1.0     | 3.9     | 74.1       | AT1G80820  | cinnamoyl-CoA reductase, putative                                           |
| 20 | 261242_at | 5                          | 6.4     | 13.9    | 20.9       | 11                         | 1.2     | 1.7     | 72.3       | AT1G32960  | subtilisin-like serine protease                                             |
| 21 | 248322_at | 20                         | 1.2     | 68.9    | 159.8      | 20                         | 0.3     | 3.3     | 70.8       | AT5G52760  | heavy-metal-associated domain-containing protein                            |
| 22 | 247145_at | 5                          | 2.5     | 23.9    | 47.7       | 4                          | 2.1     | 0.8     | 70.3       | AT5G65600  | receptor protein kinase-related protein                                     |
| 23 | 246349_at | 9                          | 1.8     | 8.5     | 18.7       | 2                          | 1.2     | 7.5     | 67.7       | AT1G51915  | expressed protein                                                           |
| 24 | 262213_at | 21                         | 1.0     | 25.4    | 27.6       | 22                         | 2.6     | 1.0     | 64.5       | AT1G74870  | conserved hypothetical protein                                              |
| 25 | 265422_at | 9                          | 3.1     | 1.6     | 1.1        | 22                         | 0.6     | 14.6    | 61.7       | AT2G20800  | NADH dehydrogenase family                                                   |
| 26 | 259439_at | 25                         | 0.8     | 7.6     | 10.7       | 14                         | 4.5     | 2.4     | 61.4       | AT1G01480  | 1-aminocyclopropane-1-carboxylate synthase 2 (ACC synthase 2) (ACS2) (ACC1) |
| 27 | 256833_at | 22                         | 1.1     | 11.8    | 9.2        | 10                         | 4.3     | 5.8     | 61.2       | AT3G22910  | calcium-transporting ATPase (calcium pump), putative                        |
| 28 | 253046_at | 83                         | 2.3     | 23.2    | 27.3       | 57                         | 1.3     | 4.2     | 60.8       | AT4G37370  | cytochrome P450, putative                                                   |
| 29 | 257950_at | 5                          | 2.5     | 6.2     | 14.0       | 3                          | 2.5     | 3.0     | 60.4       | AT3G21780  | UDP-glycosyltransferase family                                              |
| 30 | 252515_at | 649                        | 1.4     | 0.3     | 0.4        | 26                         | 1.2     | 13.3    | 59.7       | AT3G46230  | class I heat shock protein(HSP 17.4)                                        |

|    |             |      |     |      |       |     |      |      |      |           |                                                      |
|----|-------------|------|-----|------|-------|-----|------|------|------|-----------|------------------------------------------------------|
| 31 | 256285_at   | 31   | 4.5 | 4.0  | 3.1   | 6   | 1.0  | 4.7  | 57.3 | AT3G12510 | expressed protein                                    |
| 32 | 267391_at   | 45   | 1.2 | 1.7  | 1.1   | 31  | 2.7  | 3.7  | 54.2 | AT2G44480 | glycosyl hydrolase family 1                          |
| 33 | 260904_at   | 35   | 1.1 | 1.8  | 2.5   | 19  | 4.4  | 2.3  | 53.8 | AT1G02450 | expressed protein                                    |
| 34 | 251774_at   | 24   | 0.5 | 9.4  | 10.4  | 15  | 11.0 | 5.7  | 49.5 | AT3G55840 | nematode resistance protein-related protein          |
| 35 | 250506_at   | 74   | 2.3 | 2.6  | 1.5   | 12  | 10.8 | 26.9 | 49.5 | AT5G09930 | ABC transporter family protein                       |
| 36 | 246927_s_at | 8    | 1.4 | 2.4  | 2.9   | 3   | 1.0  | 5.6  | 49.2 | AT5G25260 | nodulin - like protein                               |
| 37 | 266720_s_at | 308  | 2.6 | 2.3  | 1.6   | 5   | 4.8  | 5.7  | 49.0 | AT2G46790 | pseudo-response regulator, APRR9 (APRR1/TOC1 family) |
| 38 | 251950_at   | 11   | 1.2 | 2.3  | 13.8  | 5   | 3.8  | 0.7  | 48.3 | AT3G53600 | zinc finger - like protein                           |
| 39 | 263402_at   | 18   | 1.5 | 3.6  | 3.4   | 22  | 4.4  | 14.1 | 47.5 | AT2G04050 | MATE efflux protein family                           |
| 40 | 266800_at   | 35   | 1.0 | 49.0 | 166.8 | 6   | 1.4  | 1.1  | 47.4 | AT2G22880 | hypothetical protein                                 |
| 41 | 251871_at   | 2    | 6.8 | 5.8  | 11.5  | 2   | 19.3 | 13.7 | 45.5 | AT3G54520 | hypothetical protein                                 |
| 42 | 260522_x_at | 164  | 6.9 | 47.7 | 47.2  | 157 | 0.8  | 4.5  | 43.9 | AT2G41730 | expressed protein                                    |
| 43 | 245976_at   | 21   | 8.9 | 22.5 | 31.6  | 4   | 2.1  | 8.0  | 43.5 | AT5G13080 | WRKY family transcription factor                     |
| 44 | 267565_at   | 8    | 2.9 | 1.4  | 5.5   | 16  | 1.3  | 5.9  | 43.0 | AT2G30750 | cytochrome p450 71A12                                |
| 45 | 265725_at   | 38   | 2.5 | 17.7 | 27.3  | 21  | 3.0  | 5.2  | 42.5 | AT2G32030 | GCN5-related N-acetyltransferase (GNAT) family       |
| 46 | 262072_at   | 19   | 5.6 | 36.3 | 41.6  | 12  | 2.0  | 1.5  | 42.0 | AT1G59590 | expressed protein                                    |
| 47 | 253044_at   | 24   | 3.3 | 96.8 | 131.9 | 7   | 7.4  | 2.9  | 41.0 | AT4G37290 | expressed protein                                    |
| 48 | 250351_at   | 1098 | 0.5 | 0.2  | 0.4   | 26  | 1.5  | 3.2  | 40.6 | AT5G12030 | heat shock protein 17.6A                             |
| 49 | 266071_at   | 71   | 1.1 | 3.7  | 7.1   | 76  | 1.0  | 3.2  | 40.6 | AT2G18680 | expressed protein                                    |
| 50 | 256442_at   | 3    | 6.9 | 60.0 | 308.7 | 17  | 0.7  | 6.2  | 40.1 | AT3G10930 | expressed protein                                    |
| 51 | 263378_at   | 23   | 5.0 | 1.7  | 2.3   | 8   | 1.6  | 2.0  | 39.5 | AT2G40180 | protein phosphatase 2C (PP2C), putative              |
| 52 | 266070_at   | 67   | 0.5 | 1.1  | 1.3   | 30  | 0.8  | 4.1  | 39.1 | AT2G18660 | expressed protein                                    |
| 53 | 245250_at   | 31   | 1.6 | 41.4 | 57.6  | 19  | 1.5  | 13.1 | 37.8 | AT4G17490 | ethylene responsive element binding factor (ERF6)    |
| 54 | 264042_at   | 163  | 5.4 | 30.3 | 25.7  | 157 | 0.8  | 5.8  | 36.7 | AT2G03760 | steroid sulfotransferase, putative                   |
| 55 | 263539_at   | 29   | 1.4 | 1.4  | 1.5   | 31  | 0.6  | 1.9  | 36.6 | AT2G24850 | aminotransferase, putative                           |
| 56 | 261021_at   | 73   | 1.8 | 5.0  | 7.2   | 52  | 1.1  | 3.5  | 36.5 | AT1G26380 | FAD-linked oxidoreductase family                     |
| 57 | 249197_at   | 7    | 1.6 | 44.1 | 97.9  | 9   | 0.7  | 1.6  | 34.5 | AT5G42380 | calmodulin-related protein, putative                 |
| 58 | 260804_at   | 10   | 1.5 | 32.3 | 57.6  | 17  | 1.0  | 2.2  | 34.4 | AT1G78410 | expressed protein                                    |
| 59 | 263515_at   | 128  | 1.7 | 3.5  | 2.8   | 95  | 1.3  | 14.3 | 33.6 | AT2G21640 | expressed protein                                    |
| 60 | 252908_at   | 56   | 0.9 | 7.5  | 11.7  | 47  | 1.3  | 2.9  | 33.4 | AT4G39670 | expressed protein                                    |
| 61 | 258203_at   | 70   | 1.3 | 5.0  | 4.1   | 20  | 5.4  | 4.7  | 33.1 | AT3G13950 | expressed protein                                    |
| 62 | 251176_at   | 80   | 1.3 | 4.2  | 4.2   | 106 | 1.0  | 2.9  | 32.6 | AT3G63380 | calcium-transporting ATPase (calcium pump), putative |
| 63 | 252131_at   | 98   | 2.6 | 41.3 | 42.0  | 109 | 0.7  | 1.9  | 31.4 | AT3G50930 | AAA-type ATPase family                               |
| 64 | 252334_at   | 52   | 1.2 | 3.8  | 3.6   | 75  | 1.1  | 4.0  | 30.1 | AT3G48850 | mitochondrial phosphate transporter, putative        |
| 65 | 251705_at   | 71   | 1.4 | 8.0  | 14.4  | 92  | 1.0  | 1.4  | 29.8 | AT3G56400 | WRKY family transcription factor                     |
| 66 | 254271_at   | 12   | 1.9 | 5.8  | 5.9   | 23  | 7.9  | 1.5  | 29.6 | AT4G23150 | serine/threonine kinase - like protein               |
| 67 | 252136_at   | 53   | 1.6 | 4.0  | 5.4   | 87  | 1.0  | 4.7  | 29.3 | AT3G50770 | calmodulin-related protein, putative                 |

|     |             |     |     |      |       |     |     |     |      |           |                                                  |
|-----|-------------|-----|-----|------|-------|-----|-----|-----|------|-----------|--------------------------------------------------|
| 68  | 258953_at   | 6   | 3.2 | 12.6 | 15.2  | 5   | 1.9 | 8.9 | 29.2 | AT3G01430 | expressed protein                                |
| 69  | 250796_at   | 55  | 1.1 | 2.5  | 7.3   | 28  | 3.4 | 1.4 | 28.6 | AT5G05300 | hypothetical protein                             |
| 70  | 252984_at   | 57  | 1.8 | 1.6  | 1.5   | 45  | 1.8 | 3.1 | 26.6 | AT4G37990 | mannitol dehydrogenase (ELI3-2), putative        |
| 71  | 255340_at   | 8   | 1.2 | 6.3  | 8.0   | 17  | 0.6 | 1.5 | 26.3 | AT4G04490 | receptor-related protein kinase                  |
| 72  | 249001_at   | 5   | 1.5 | 9.1  | 19.0  | 16  | 1.0 | 2.0 | 26.3 | AT5G44990 | hypothetical protein                             |
| 73  | 248169_at   | 30  | 1.1 | 1.0  | 0.7   | 33  | 3.3 | 6.3 | 26.2 | AT5G54610 | ankyrin-repeat-containing protein-related        |
| 74  | 256356_s_at | 30  | 1.0 | 5.0  | 7.1   | 30  | 6.8 | 5.8 | 26.2 | AT1G66500 | expressed protein                                |
| 75  | 256319_at   | 3   | 1.3 | 1.0  | 1.5   | 5   | 2.1 | 1.6 | 25.6 | AT1G35910 | trehalose-6-phosphate phosphatase, putative      |
| 76  | 245173_at   | 13  | 4.2 | 15.0 | 20.9  | 15  | 1.6 | 5.1 | 25.2 | AT2G47520 | AP2 domain transcription factor, putative        |
| 77  | 249770_at   | 35  | 2.5 | 14.2 | 27.2  | 29  | 0.1 | 0.9 | 25.2 | AT5G24110 | WRKY family transcription factor                 |
| 78  | 267140_at   | 9   | 4.0 | 9.3  | 12.1  | 6   | 2.2 | 2.3 | 25.1 | AT2G38250 | GT-1-related transcription factor                |
| 79  | 254055_at   | 18  | 0.8 | 8.3  | 12.4  | 22  | 3.8 | 5.0 | 23.9 | AT4G25330 | expressed protein                                |
| 80  | 260881_at   | 67  | 2.0 | 8.1  | 11.9  | 47  | 0.9 | 4.5 | 23.7 | AT1G21550 | calcium-binding protein, putative                |
| 81  | 255893_at   | 40  | 1.6 | 2.4  | 1.8   | 22  | 4.3 | 9.7 | 23.6 | AT1G17960 | threonyl-tRNA synthetase -related                |
| 82  | 265597_at   | 40  | 2.0 | 39.5 | 60.1  | 52  | 1.1 | 1.8 | 23.5 | AT2G20145 | disease resistance protein (TIR class), putative |
| 83  | 252417_at   | 34  | 1.0 | 2.4  | 1.5   | 38  | 1.8 | 1.9 | 23.2 | AT3G47480 | calcium-binding EF-hand family protein           |
| 84  | 261065_at   | 95  | 4.1 | 4.2  | 5.3   | 47  | 2.7 | 7.0 | 22.9 | AT1G07500 | hypothetical protein                             |
| 85  | 246821_at   | 45  | 3.4 | 17.9 | 26.7  | 47  | 1.5 | 1.9 | 22.7 | AT5G26920 | calmodulin-binding protein                       |
| 86  | 262229_at   | 227 | 1.3 | 2.6  | 2.3   | 37  | 2.0 | 2.8 | 22.4 | AT1G68620 | expressed protein                                |
| 87  | 262911_s_at | 728 | 0.9 | 0.7  | 1.0   | 63  | 1.5 | 4.4 | 21.6 | AT1G59860 | heat shock protein, putative                     |
| 88  | 265221_s_at | 179 | 0.6 | 0.9  | 1.5   | 30  | 0.8 | 4.6 | 21.5 | AT2G02010 | glutamate decarboxylase                          |
| 89  | 254869_at   | 54  | 1.1 | 2.7  | 3.1   | 86  | 0.7 | 2.3 | 21.5 | AT4G11890 | protein kinase family                            |
| 90  | 259561_at   | 132 | 2.4 | 4.0  | 2.1   | 107 | 0.8 | 2.1 | 21.0 | AT1G21250 | wall-associated kinase 1                         |
| 91  | 252977_at   | 42  | 2.6 | 3.1  | 4.4   | 19  | 2.6 | 2.0 | 20.9 | AT4G38560 | Phospholipase like protein                       |
| 92  | 265030_at   | 3   | 1.1 | 2.6  | 6.3   | 5   | 0.5 | 0.5 | 20.7 | AT1G61610 | S-locus protein kinase, putative                 |
| 93  | 247949_at   | 55  | 2.5 | 17.5 | 21.6  | 43  | 1.2 | 2.8 | 20.6 | AT5G57220 | cytochrome P450, putative                        |
| 94  | 259479_at   | 326 | 1.9 | 12.4 | 20.9  | 235 | 0.7 | 1.2 | 20.6 | AT1G19020 | expressed protein                                |
| 95  | 260978_at   | 736 | 0.6 | 0.1  | 0.2   | 14  | 2.6 | 4.1 | 20.5 | AT1G53540 | 17.6 kDa heat shock protein (AA 1-156)           |
| 96  | 251400_at   | 10  | 2.2 | 77.0 | 123.4 | 82  | 1.2 | 1.6 | 20.2 | AT3G60420 | expressed protein                                |
| 97  | 258277_at   | 77  | 1.2 | 1.0  | 1.3   | 127 | 1.2 | 1.4 | 20.1 | AT3G26830 | cytochrome P450 71B15                            |
| 98  | 263231_at   | 108 | 3.2 | 17.2 | 14.9  | 166 | 0.8 | 4.2 | 20.0 | AT1G05680 | glycosyltransferase family                       |
| 99  | 261249_at   | 40  | 1.1 | 2.1  | 2.1   | 36  | 1.3 | 2.2 | 19.9 | AT1G05880 | hypothetical protein                             |
| 100 | 263403_at   | 195 | 1.3 | 3.3  | 3.6   | 92  | 1.1 | 2.6 | 19.7 | AT2G04040 | MATE efflux protein family                       |
| 101 | 259507_at   | 119 | 1.7 | 7.5  | 7.4   | 234 | 0.9 | 2.6 | 19.4 | AT1G43910 | AAA-type ATPase family                           |
| 102 | 245440_at   | 58  | 0.9 | 2.3  | 1.7   | 15  | 1.8 | 4.5 | 19.4 | AT4G16680 | RNA helicase, putative                           |
| 103 | 249417_at   | 66  | 1.1 | 10.0 | 18.2  | 47  | 1.2 | 1.9 | 19.1 | AT5G39670 | calcium-binding EF-hand family protein           |
| 104 | 250942_at   | 4   | 1.0 | 3.8  | 8.5   | 5   | 0.8 | 1.0 | 18.9 | AT5G03350 | expressed protein                                |

|            |             |      |     |      |      |     |     |     |      |           |                                                                                    |
|------------|-------------|------|-----|------|------|-----|-----|-----|------|-----------|------------------------------------------------------------------------------------|
| <b>105</b> | 248083_at   | 5    | 4.9 | 2.6  | 2.9  | 22  | 1.4 | 2.6 | 18.2 | AT5G55420 | hypothetical protein                                                               |
| <b>106</b> | 267567_at   | 27   | 1.6 | 1.2  | 1.1  | 35  | 0.4 | 0.7 | 18.0 | AT2G30770 | cytochrome P450 71A13                                                              |
| <b>107</b> | 266292_at   | 29   | 2.2 | 2.5  | 2.0  | 54  | 1.0 | 2.1 | 17.8 | AT2G29350 | short-chain dehydrogenase/reductase family protein (tropinone reductase, putative) |
| <b>108</b> | 261367_at   | 79   | 3.2 | 3.9  | 7.9  | 66  | 3.5 | 3.5 | 17.7 | AT1G53080 | protein kinase -related                                                            |
| <b>109</b> | 247071_at   | 64   | 1.1 | 3.1  | 5.2  | 27  | 1.4 | 1.4 | 17.3 | AT5G66640 | expressed protein                                                                  |
| <b>110</b> | 265501_at   | 22   | 3.3 | 9.7  | 10.0 | 31  | 3.1 | 3.1 | 17.2 | AT2G15490 | glucosyltransferase -related                                                       |
| <b>111</b> | 259550_at   | 6    | 2.8 | 5.3  | 7.9  | 9   | 3.2 | 0.5 | 17.2 | AT1G35230 | arabinogalactan-protein (AGP5)                                                     |
| <b>112</b> | 264832_at   | 144  | 1.4 | 2.1  | 1.4  | 106 | 0.9 | 1.9 | 17.2 | AT1G03660 | unknown                                                                            |
| <b>113</b> | 264868_at   | 54   | 1.6 | 3.0  | 2.6  | 59  | 1.3 | 3.7 | 17.0 | AT1G24090 | RNase H domain-containing protein                                                  |
| <b>114</b> | 259211_at   | 57   | 1.1 | 3.6  | 4.8  | 24  | 2.5 | 2.1 | 16.9 | AT3G09020 | glycosyltransferase-related                                                        |
| <b>115</b> | 265837_at   | 9    | 2.7 | 1.9  | 3.2  | 49  | 0.3 | 2.3 | 16.6 | AT2G14560 | expressed protein                                                                  |
| <b>116</b> | 266908_at   | 29   | 4.5 | 5.9  | 7.3  | 11  | 1.8 | 2.0 | 16.2 | AT2G34650 | protein kinase (PINOID/PID)                                                        |
| <b>117</b> | 260706_at   | 14   | 2.0 | 8.9  | 9.2  | 35  | 1.2 | 2.4 | 16.1 | AT1G32350 | alternative oxidase, putative                                                      |
| <b>118</b> | 263783_at   | 156  | 1.6 | 7.9  | 10.9 | 127 | 1.0 | 1.9 | 15.9 | AT2G46400 | WRKY family transcription factor                                                   |
| <b>119</b> | 248434_at   | 450  | 2.2 | 2.9  | 1.7  | 157 | 1.0 | 5.5 | 15.7 | AT5G51440 | heat shock protein, putative                                                       |
| <b>120</b> | 258982_at   | 8    | 2.3 | 4.8  | 3.4  | 8   | 4.8 | 4.4 | 15.3 | AT3G08870 | receptor lectin kinase, putative                                                   |
| <b>121</b> | 261240_at   | 151  | 1.2 | 1.3  | 1.5  | 130 | 1.7 | 4.1 | 15.3 | AT1G32940 | subtilisin-like serine protease                                                    |
| <b>122</b> | 260648_at   | 74   | 1.8 | 3.0  | 3.5  | 85  | 0.9 | 1.8 | 15.3 | AT1G08050 | C3HC4-type zinc finger protein family                                              |
| <b>123</b> | 265418_at   | 69   | 1.5 | 0.8  | 0.3  | 22  | 2.9 | 5.3 | 14.8 | AT2G20880 | AP2 domain transcription factor                                                    |
| <b>124</b> | 253796_at   | 64   | 1.7 | 5.0  | 9.6  | 57  | 0.9 | 1.1 | 14.6 | AT4G28460 | hypothetical protein                                                               |
| <b>125</b> | 248332_at   | 2375 | 0.9 | 0.5  | 0.3  | 475 | 0.9 | 3.9 | 14.1 | AT5G52640 | heat shock protein 81-1 (HSP81-1/heat shock protein 83/HSP83)                      |
| <b>126</b> | 257763_s_at | 15   | 1.1 | 2.5  | 4.6  | 23  | 1.5 | 0.8 | 14.0 | AT3G23110 | disease resistance protein family                                                  |
| <b>127</b> | 259033_at   | 146  | 1.3 | 3.1  | 5.0  | 147 | 1.1 | 1.5 | 14.0 | AT3G09410 | pectinacylesterase family                                                          |
| <b>128</b> | 267436_at   | 146  | 1.7 | 1.8  | 1.5  | 44  | 2.4 | 2.5 | 14.0 | AT2G19190 | light repressible receptor protein kinase, putative                                |
| <b>129</b> | 245738_at   | 27   | 4.6 | 1.8  | 2.8  | 40  | 0.7 | 1.2 | 13.9 | AT1G44130 | nucellin protein, putative                                                         |
| <b>130</b> | 255753_at   | 86   | 2.3 | 15.3 | 18.6 | 75  | 1.6 | 1.8 | 13.7 | AT1G18570 | myb family transcription factor                                                    |
| <b>131</b> | 259879_at   | 31   | 1.4 | 31.0 | 41.1 | 43  | 1.9 | 1.4 | 13.6 | AT1G76650 | calcium-binding EF-hand family protein                                             |
| <b>132</b> | 253416_at   | 208  | 2.0 | 2.1  | 1.0  | 282 | 1.0 | 3.2 | 13.2 | AT4G33070 | pyruvate decarboxylase-1 (Pdc1)                                                    |
| <b>133</b> | 261648_at   | 217  | 2.4 | 21.5 | 34.1 | 159 | 1.2 | 2.1 | 13.0 | AT1G27730 | salt-tolerance zinc finger protein                                                 |
| <b>134</b> | 261763_at   | 25   | 6.5 | 7.7  | 11.6 | 51  | 0.7 | 2.0 | 12.8 | AT1G15520 | ABC transporter family protein                                                     |
| <b>135</b> | 255430_at   | 367  | 1.5 | 2.8  | 2.2  | 290 | 0.9 | 4.1 | 12.7 | AT4G03320 | chloroplast protein import component -related                                      |
| <b>136</b> | 251621_at   | 57   | 1.7 | 2.0  | 2.8  | 48  | 1.4 | 1.2 | 12.6 | AT3G57700 | protein kinase, putative                                                           |
| <b>137</b> | 261033_at   | 63   | 1.2 | 6.2  | 8.5  | 19  | 4.2 | 1.3 | 12.6 | AT1G17380 | expressed protein                                                                  |
| <b>138</b> | 259387_at   | 13   | 2.1 | 1.1  | 1.3  | 33  | 0.7 | 2.7 | 12.6 | AT1G13370 | histone H3, putative                                                               |
| <b>139</b> | 260933_at   | 69   | 1.4 | 2.3  | 1.3  | 47  | 1.7 | 4.1 | 12.5 | AT1G02470 | expressed protein                                                                  |
| <b>140</b> | 246340_s_at | 95   | 1.0 | 1.4  | 1.9  | 24  | 4.0 | 1.8 | 12.5 | AT3G44860 | methyltransferase-related                                                          |

|     |           |      |      |      |      |     |     |     |      |           |                                                            |
|-----|-----------|------|------|------|------|-----|-----|-----|------|-----------|------------------------------------------------------------|
| 141 | 264758_at | 53   | 3.0  | 9.3  | 17.5 | 35  | 0.5 | 1.2 | 12.5 | AT1G61340 | F-box protein family                                       |
| 142 | 247953_at | 45   | 1.2  | 2.1  | 4.1  | 24  | 6.7 | 4.2 | 12.4 | AT5G57260 | cytochrome P450 71B10                                      |
| 143 | 264580_at | 88   | 1.6  | 2.6  | 3.2  | 106 | 1.2 | 1.8 | 12.3 | AT1G05340 | expressed protein                                          |
| 144 | 259297_at | 72   | 1.6  | 3.3  | 2.6  | 94  | 1.4 | 2.1 | 12.3 | AT3G05360 | disease resistance protein family (LRR)                    |
| 145 | 246099_at | 840  | 1.6  | 4.3  | 5.7  | 288 | 0.9 | 3.3 | 12.2 | AT5G20230 | plastocyanin-like domain containing protein                |
| 146 | 262085_at | 65   | 1.7  | 10.8 | 27.2 | 105 | 0.7 | 0.8 | 12.2 | AT1G56060 | hypothetical protein                                       |
| 147 | 259805_at | 54   | 1.0  | 1.7  | 1.7  | 11  | 1.2 | 0.5 | 12.0 | AT1G47890 | disease resistance protein family                          |
| 148 | 253632_at | 24   | 4.1  | 12.9 | 31.4 | 24  | 2.6 | 2.2 | 12.0 | AT4G30430 | senescence-associated protein family                       |
| 149 | 267411_at | 598  | 1.3  | 1.7  | 1.5  | 102 | 0.7 | 2.5 | 12.0 | AT2G34930 | disease resistance protein family                          |
| 150 | 246293_at | 85   | 2.1  | 15.7 | 22.2 | 124 | 0.7 | 1.3 | 12.0 | AT3G56710 | SigA binding protein                                       |
| 151 | 261216_at | 81   | 1.1  | 1.6  | 2.0  | 95  | 0.7 | 1.6 | 12.0 | AT1G33030 | O-methyltransferase family 2                               |
| 152 | 259410_at | 88   | 0.9  | 1.8  | 2.5  | 81  | 1.2 | 1.2 | 11.8 | AT1G13340 | expressed protein                                          |
| 153 | 256430_at | 214  | 1.5  | 2.0  | 2.0  | 156 | 0.9 | 1.2 | 11.7 | AT3G11020 | DRE binding protein (DREB2B)                               |
| 154 | 259428_at | 98   | 1.2  | 2.6  | 5.1  | 93  | 0.7 | 0.9 | 11.7 | AT1G01560 | mitogen-activated protein kinase (MAPK), putative (MPK11)  |
| 155 | 245329_at | 394  | 2.0  | 5.6  | 6.0  | 375 | 0.9 | 1.3 | 11.6 | AT4G14365 | expressed protein                                          |
| 156 | 261006_at | 4    | 6.4  | 5.5  | 14.2 | 21  | 0.4 | 1.3 | 11.4 | AT1G26410 | FAD-linked oxidoreductase family                           |
| 157 | 267083_at | 1812 | 2.0  | 6.3  | 7.6  | 777 | 1.1 | 2.2 | 11.4 | AT2G41100 | calmodulin-related protein 3, touch-induced (TCH3)         |
| 158 | 245755_at | 35   | 1.5  | 19.0 | 30.7 | 33  | 1.5 | 1.0 | 11.4 | AT1G35210 | expressed protein                                          |
| 159 | 253414_at | 402  | 1.4  | 7.9  | 8.2  | 317 | 0.9 | 1.8 | 11.4 | AT4G33050 | expressed protein                                          |
| 160 | 260068_at | 27   | 2.1  | 10.5 | 10.8 | 45  | 0.8 | 1.1 | 11.3 | AT1G73805 | calmodulin-binding protein                                 |
| 161 | 266010_at | 48   | 2.0  | 21.4 | 51.2 | 60  | 0.9 | 0.8 | 11.3 | AT2G37430 | C2H2-type zinc finger protein -related                     |
| 162 | 245052_at | 732  | 1.0  | 1.0  | 0.9  | 353 | 1.0 | 2.3 | 11.3 | AT2G26440 | pectinesterase family                                      |
| 163 | 266017_at | 320  | 1.6  | 2.9  | 3.0  | 166 | 1.0 | 1.8 | 11.0 | AT2G18690 | expressed protein                                          |
| 164 | 250666_at | 146  | 1.2  | 2.3  | 2.6  | 53  | 1.4 | 2.6 | 10.7 | AT5G07100 | WRKY family transcription factor                           |
| 165 | 254243_at | 87   | 1.3  | 1.6  | 2.4  | 86  | 0.8 | 1.5 | 10.5 | AT4G23210 | serine/threonine kinase - like protein                     |
| 166 | 246370_at | 43   | 2.1  | 6.8  | 13.8 | 83  | 1.0 | 1.4 | 10.5 | AT1G51920 | hypothetical protein                                       |
| 167 | 266606_at | 96   | 2.0  | 3.1  | 3.2  | 29  | 2.8 | 3.0 | 10.5 | AT2G46310 | AP2 domain transcription factor, putative                  |
| 168 | 249481_at | 100  | 1.1  | 1.6  | 1.3  | 125 | 0.8 | 2.1 | 10.4 | AT5G38900 | frnE protein - like                                        |
| 169 | 261005_at | 96   | 2.2  | 2.4  | 2.7  | 93  | 0.6 | 1.8 | 10.4 | AT1G26420 | FAD-linked oxidoreductase family                           |
| 170 | 252873_at | 15   | 13.9 | 3.4  | 4.0  | 14  | 2.1 | 0.4 | 10.3 | AT4G40020 | hypothetical protein                                       |
| 171 | 261020_at | 29   | 2.0  | 0.8  | 1.0  | 27  | 1.3 | 2.2 | 10.3 | AT1G26390 | FAD-linked oxidoreductase family                           |
| 172 | 247253_at | 13   | 1.3  | 2.0  | 4.2  | 28  | 2.9 | 3.6 | 10.3 | AT5G64790 | glycosyl hydrolase family 17                               |
| 173 | 260239_at | 110  | 1.2  | 3.1  | 3.0  | 72  | 1.2 | 1.5 | 10.3 | AT1G74360 | leucine-rich repeat transmembrane protein kinase, putative |
| 174 | 261192_at | 278  | 4.2  | 7.7  | 4.7  | 210 | 1.0 | 2.2 | 10.2 | AT1G32870 | NAM protein -related                                       |
| 175 | 263894_at | 49   | 0.7  | 1.1  | 0.8  | 24  | 0.8 | 1.9 | 10.1 | AT2G21910 | cytochrome P450, putative                                  |
| 176 | 247431_at | 77   | 2.2  | 3.0  | 1.9  | 88  | 0.5 | 1.0 | 10.0 | AT5G62520 | expressed protein                                          |
| 177 | 257363_at | 6    | 1.2  | 1.6  | 9.2  | 15  | 1.6 | 1.0 | 9.9  | AT2G45760 | C2 domain-containing protein                               |

|     |             |       |     |      |      |      |     |     |     |           |                                                             |
|-----|-------------|-------|-----|------|------|------|-----|-----|-----|-----------|-------------------------------------------------------------|
| 178 | 252825_at   | 72    | 1.5 | 2.5  | 2.9  | 44   | 4.2 | 2.7 | 9.9 | AT4G39890 | Ras family GTP-binding protein                              |
| 179 | 258792_at   | 176   | 1.1 | 4.8  | 14.0 | 189  | 0.8 | 1.1 | 9.9 | AT3G04640 | glycine-rich protein                                        |
| 180 | 256245_at   | 4032  | 0.9 | 0.6  | 0.3  | 946  | 1.0 | 4.8 | 9.8 | AT3G12580 | heat shock protein hsp70                                    |
| 181 | 251603_at   | 33    | 2.6 | 7.4  | 6.5  | 19   | 0.2 | 1.7 | 9.7 | AT3G57760 | expressed protein                                           |
| 182 | 258002_at   | 46    | 1.4 | 1.8  | 2.1  | 50   | 1.3 | 2.2 | 9.7 | AT3G28930 | AIG2-related protein                                        |
| 183 | 246018_at   | 234   | 0.9 | 3.1  | 8.0  | 148  | 1.2 | 1.1 | 9.6 | AT5G10695 | expressed protein                                           |
| 184 | 267028_at   | 395   | 1.9 | 14.9 | 14.9 | 346  | 1.1 | 1.1 | 9.6 | AT2G38470 | WRKY family transcription factor                            |
| 185 | 258752_at   | 101   | 1.8 | 4.3  | 3.3  | 51   | 0.9 | 1.9 | 9.5 | AT3G09520 | exocyst subunit EXO70 family                                |
| 186 | 248327_at   | 123   | 1.4 | 9.9  | 16.7 | 132  | 0.7 | 1.2 | 9.4 | AT5G52750 | heavy-metal-associated domain-containing protein            |
| 187 | 256576_at   | 38    | 2.2 | 2.9  | 4.0  | 56   | 0.5 | 1.8 | 9.4 | AT3G28210 | zinc finger protein (PMZ) -related                          |
| 188 | 256407_at   | 52    | 1.2 | 1.8  | 1.8  | 15   | 1.5 | 3.3 | 9.4 | AT1G66570 | sucrose transporter (sucrose-proton symporter), putative    |
| 189 | 264148_at   | 32    | 2.3 | 2.4  | 2.8  | 37   | 0.9 | 4.0 | 9.3 | AT1G02220 | NAM (no apical meristem)-related protein                    |
| 190 | 248231_at   | 50    | 1.2 | 1.3  | 2.4  | 42   | 2.9 | 5.1 | 9.3 | AT5G53770 | expressed protein                                           |
| 191 | 248686_at   | 991   | 1.6 | 3.0  | 3.4  | 253  | 1.1 | 2.8 | 9.3 | AT5G48540 | 33 kDa secretory protein-related                            |
| 192 | 249255_at   | 56    | 0.8 | 1.1  | 1.0  | 24   | 1.0 | 3.1 | 9.3 | AT5G41610 | cation/hydrogen exchanger, putative (CHX18)                 |
| 193 | 256366_at   | 238   | 1.2 | 3.3  | 3.7  | 245  | 1.0 | 1.1 | 9.2 | AT1G66880 | serine/threonine protein kinase family                      |
| 194 | 256306_at   | 51    | 1.6 | 9.5  | 20.2 | 63   | 0.8 | 0.9 | 9.2 | AT1G30370 | lipase (class 3) family                                     |
| 195 | 263948_at   | 96    | 1.0 | 2.8  | 3.7  | 54   | 1.9 | 1.8 | 9.1 | AT2G35980 | harpin-induced protein 1 family (HIN1)                      |
| 196 | 266995_at   | 237   | 1.2 | 2.0  | 1.3  | 194  | 1.3 | 1.3 | 9.1 | AT2G34500 | cytochrome P450 family                                      |
| 197 | 253181_at   | 10    | 2.7 | 14.2 | 17.9 | 58   | 0.6 | 0.7 | 9.0 | AT4G35180 | amino acid transporter family                               |
| 198 | 263345_s_at | 17564 | 1.4 | 1.1  | 1.5  | 1352 | 1.4 | 3.5 | 9.0 | AT2G05070 | light-harvesting chlorophyll a/b binding protein            |
| 199 | 264434_at   | 90    | 1.9 | 3.3  | 4.3  | 69   | 1.1 | 0.7 | 8.9 | AT1G10340 | ankyrin repeat protein family                               |
| 200 | 251975_at   | 443   | 1.1 | 1.1  | 0.7  | 406  | 1.1 | 3.6 | 8.9 | AT3G53230 | CDC48 - like protein                                        |
| 201 | 267341_at   | 55    | 2.0 | 1.9  | 1.2  | 16   | 1.7 | 5.7 | 8.9 | AT2G44200 | expressed protein                                           |
| 202 | 248440_at   | 273   | 1.4 | 1.9  | 1.5  | 145  | 1.5 | 2.2 | 8.9 | AT5G51260 | acid phosphatase                                            |
| 203 | 249494_at   | 358   | 2.0 | 3.3  | 2.4  | 337  | 1.1 | 2.3 | 8.9 | AT5G39050 | transferase family                                          |
| 204 | 265705_at   | 20    | 1.0 | 0.9  | 2.5  | 12   | 4.0 | 0.6 | 8.9 | AT2G03410 | MO25 protein family                                         |
| 205 | 251364_at   | 33    | 2.8 | 0.8  | 0.7  | 28   | 2.2 | 2.6 | 8.8 | AT3G61300 | C2 domain-containing protein                                |
| 206 | 265723_at   | 17    | 3.4 | 7.3  | 27.4 | 23   | 0.3 | 0.6 | 8.7 | AT2G32140 | disease resistance protein (TIR class), putative            |
| 207 | 253161_at   | 2879  | 0.6 | 0.5  | 1.1  | 66   | 1.6 | 2.6 | 8.7 | AT4G35770 | senescence-associated protein sen1                          |
| 208 | 257478_at   | 35    | 3.3 | 13.8 | 13.9 | 24   | 0.7 | 0.3 | 8.7 | AT1G16130 | WAK-like kinase (WLK)                                       |
| 209 | 257061_at   | 79    | 1.1 | 1.9  | 3.2  | 73   | 0.9 | 1.5 | 8.6 | AT3G18250 | hypothetical protein                                        |
| 210 | 260568_at   | 141   | 1.4 | 1.4  | 1.0  | 211  | 1.1 | 2.5 | 8.6 | AT2G43570 | glycosyl hydrolase family 19 (chitinase)                    |
| 211 | 266821_at   | 7     | 1.9 | 35.6 | 90.2 | 20   | 1.5 | 0.4 | 8.5 | AT2G44840 | ethylene response element binding protein (EREBP), putative |
| 212 | 248657_at   | 2151  | 0.7 | 0.3  | 0.3  | 158  | 1.3 | 3.4 | 8.5 | AT5G48570 | peptidylprolyl isomerase                                    |
| 213 | 249983_at   | 429   | 1.9 | 4.0  | 4.3  | 297  | 0.9 | 2.1 | 8.5 | AT5G18470 | expressed protein                                           |
| 214 | 256376_s_at | 59    | 2.2 | 5.3  | 5.9  | 62   | 0.8 | 0.9 | 8.5 | AT1G66690 | methyltransferase-related                                   |

|            |             |      |     |      |      |     |     |     |     |           |                                                                     |
|------------|-------------|------|-----|------|------|-----|-----|-----|-----|-----------|---------------------------------------------------------------------|
| <b>215</b> | 260046_at   | 99   | 1.9 | 6.4  | 7.6  | 103 | 0.9 | 1.1 | 8.4 | AT1G73800 | calmodulin-binding protein                                          |
| <b>216</b> | 266072_at   | 350  | 1.5 | 3.1  | 4.9  | 142 | 1.1 | 1.3 | 8.4 | AT2G18700 | glycosyltransferase family 20                                       |
| <b>217</b> | 257382_at   | 14   | 2.1 | 2.6  | 0.8  | 18  | 0.4 | 0.3 | 8.4 | AT2G40750 | WRKY family transcription factor                                    |
| <b>218</b> | 258805_at   | 502  | 1.2 | 1.8  | 1.3  | 245 | 1.2 | 1.6 | 8.4 | AT3G04010 | glycosyl hydrolase family 17                                        |
| <b>219</b> | 260287_at   | 320  | 1.4 | 2.5  | 4.3  | 114 | 1.8 | 3.8 | 8.3 | AT1G80440 | Kelch repeat containing F-box protein family                        |
| <b>220</b> | 267246_at   | 341  | 2.0 | 4.6  | 4.5  | 253 | 1.2 | 1.7 | 8.3 | AT2G30250 | WRKY family transcription factor                                    |
| <b>221</b> | 265674_at   | 231  | 1.4 | 5.0  | 9.4  | 235 | 0.9 | 1.1 | 8.3 | AT2G32190 | expressed protein                                                   |
| <b>222</b> | 261123_at   | 48   | 2.2 | 2.3  | 0.4  | 43  | 2.9 | 4.0 | 8.3 | AT1G62860 | pentatricopeptide (PPR) repeat-containing protein                   |
| <b>223</b> | 245038_at   | 315  | 1.1 | 3.0  | 4.7  | 183 | 0.8 | 1.0 | 8.3 | AT2G26560 | patatin, putative                                                   |
| <b>224</b> | 249777_at   | 197  | 2.1 | 6.5  | 9.3  | 215 | 1.0 | 1.6 | 8.3 | AT5G24210 | lipase (class 3) family                                             |
| <b>225</b> | 252373_at   | 227  | 1.4 | 2.6  | 3.2  | 188 | 0.9 | 1.2 | 8.1 | AT3G48090 | disease resistance protein (EDS1)                                   |
| <b>226</b> | 262517_at   | 282  | 1.6 | 3.7  | 2.3  | 443 | 1.0 | 3.1 | 8.1 | AT1G17180 | glutathione transferase, putative                                   |
| <b>227</b> | 245613_at   | 66   | 0.4 | 1.5  | 3.6  | 30  | 1.3 | 1.4 | 8.1 | AT4G14450 | hypothetical protein                                                |
| <b>228</b> | 256017_at   | 474  | 1.4 | 4.5  | 5.2  | 248 | 0.9 | 1.3 | 8.0 | AT1G19180 | expressed protein                                                   |
| <b>229</b> | 251282_at   | 131  | 3.1 | 6.9  | 6.0  | 70  | 0.9 | 2.4 | 8.0 | AT3G61630 | AP2 domain transcription factor, putative                           |
| <b>230</b> | 265668_at   | 140  | 4.3 | 14.8 | 15.4 | 127 | 1.1 | 1.3 | 7.9 | AT2G32020 | GCN5-related N-acetyltransferase (GNAT) family                      |
| <b>231</b> | 247435_at   | 296  | 1.5 | 2.9  | 1.9  | 254 | 1.3 | 1.8 | 7.9 | AT5G62480 | glutathione transferase, putative                                   |
| <b>232</b> | 251479_at   | 47   | 1.2 | 2.5  | 2.9  | 49  | 1.1 | 1.1 | 7.9 | AT3G59700 | receptor lectin kinase, putative                                    |
| <b>233</b> | 262671_at   | 46   | 1.5 | 3.1  | 5.1  | 49  | 1.5 | 1.4 | 7.9 | AT1G76040 | calcium-dependent protein kinase, putative (CDPK)                   |
| <b>234</b> | 264866_at   | 23   | 0.4 | 29.8 | 47.8 | 68  | 1.1 | 0.6 | 7.9 | AT1G24140 | metallo proteinase -related                                         |
| <b>235</b> | 260225_at   | 79   | 4.9 | 3.2  | 3.4  | 84  | 0.8 | 1.0 | 7.9 | AT1G74590 | glutathione transferase, putative                                   |
| <b>236</b> | 253737_at   | 29   | 1.1 | 7.0  | 21.5 | 38  | 3.1 | 0.9 | 7.9 | AT4G28703 | expressed protein                                                   |
| <b>237</b> | 256340_at   | 71   | 1.3 | 2.0  | 1.4  | 43  | 6.4 | 4.4 | 7.8 | AT1G72070 | DnaJ protein family                                                 |
| <b>238</b> | 265670_s_at | 328  | 1.1 | 4.3  | 8.3  | 280 | 0.9 | 1.3 | 7.8 | AT2G32210 | expressed protein                                                   |
| <b>239</b> | 253485_at   | 231  | 1.3 | 6.4  | 5.0  | 208 | 0.8 | 1.2 | 7.7 | AT4G31800 | WRKY family transcription factor                                    |
| <b>240</b> | 261934_at   | 248  | 1.3 | 1.2  | 1.0  | 195 | 1.0 | 1.3 | 7.7 | AT1G22400 | glycosyltransferase family                                          |
| <b>241</b> | 254543_at   | 128  | 0.9 | 1.6  | 1.7  | 152 | 1.1 | 3.3 | 7.7 | AT4G19810 | glycosyl hydrolase family 18                                        |
| <b>242</b> | 246984_at   | 45   | 1.0 | 0.9  | 2.1  | 46  | 1.6 | 1.2 | 7.6 | AT5G67310 | cytochrome P450 family                                              |
| <b>243</b> | 247655_at   | 274  | 4.2 | 12.2 | 13.1 | 203 | 1.2 | 2.2 | 7.6 | AT5G59820 | zinc finger protein Zat12                                           |
| <b>244</b> | 257401_at   | 161  | 1.7 | 2.3  | 1.9  | 153 | 1.1 | 1.8 | 7.6 | AT1G23550 | hypothetical protein                                                |
| <b>245</b> | 248062_at   | 290  | 1.2 | 1.5  | 1.8  | 212 | 0.5 | 2.1 | 7.6 | AT5G55450 | protease inhibitor/seed storage/lipid transfer protein (LTP) family |
| <b>246</b> | 245041_at   | 179  | 1.2 | 11.9 | 17.7 | 159 | 0.9 | 0.9 | 7.5 | AT2G26530 | AR781, similar to yeast pheromone receptor                          |
| <b>247</b> | 245076_at   | 109  | 1.4 | 1.4  | 2.1  | 56  | 1.0 | 1.3 | 7.5 | AT2G23170 | expressed protein                                                   |
| <b>248</b> | 248564_at   | 49   | 1.7 | 3.4  | 3.6  | 28  | 0.3 | 2.3 | 7.5 | AT5G49700 | hypothetical protein                                                |
| <b>249</b> | 258239_at   | 4368 | 1.7 | 1.3  | 2.0  | 237 | 1.6 | 2.6 | 7.4 | AT3G27690 | light harvesting chlorophyll A/B binding protein, putative          |
| <b>250</b> | 251633_at   | 25   | 1.4 | 5.4  | 7.0  | 39  | 0.9 | 2.2 | 7.4 | AT3G57460 | hypothetical protein                                                |
| <b>251</b> | 250515_at   | 128  | 1.1 | 1.8  | 1.6  | 184 | 1.2 | 4.4 | 7.4 | AT5G09570 | expressed protein                                                   |

|            |             |      |     |      |      |      |     |     |     |           |                                                           |
|------------|-------------|------|-----|------|------|------|-----|-----|-----|-----------|-----------------------------------------------------------|
| <b>252</b> | 254265_s_at | 59   | 1.3 | 1.0  | 1.1  | 43   | 0.9 | 1.9 | 7.4 | AT4G23140 | serine threonine kinase - like protein                    |
| <b>253</b> | 260761_at   | 56   | 1.3 | 1.2  | 1.5  | 69   | 0.6 | 1.5 | 7.3 | AT1G49150 | hypothetical protein                                      |
| <b>254</b> | 259937_s_at | 420  | 1.1 | 3.4  | 3.4  | 332  | 1.1 | 2.6 | 7.3 | AT1G71330 | ABC transporter family protein                            |
| <b>255</b> | 253799_at   | 41   | 1.6 | 1.4  | 1.1  | 67   | 1.1 | 1.2 | 7.3 | AT4G28140 | AP2 domain transcription factor, putative                 |
| <b>256</b> | 254524_at   | 32   | 2.8 | 7.7  | 7.1  | 27   | 2.3 | 1.2 | 7.3 | AT4G20000 | expressed protein                                         |
| <b>257</b> | 258321_at   | 3369 | 4.5 | 3.8  | 2.6  | 466  | 1.1 | 4.7 | 7.3 | AT3G22840 | early light-induced protein                               |
| <b>258</b> | 265276_at   | 99   | 0.9 | 1.2  | 2.0  | 49   | 1.9 | 1.9 | 7.3 | AT2G28400 | expressed protein                                         |
| <b>259</b> | 252415_at   | 879  | 1.0 | 1.0  | 1.6  | 78   | 2.4 | 3.3 | 7.3 | AT3G47340 | glutamine-dependent asparagine synthetase                 |
| <b>260</b> | 247323_at   | 1031 | 1.6 | 1.1  | 0.9  | 68   | 0.5 | 3.2 | 7.2 | AT5G64170 | expressed protein                                         |
| <b>261</b> | 252214_at   | 179  | 1.4 | 2.6  | 3.7  | 154  | 0.9 | 1.4 | 7.2 | AT3G50260 | AP2 domain transcription factor, putative                 |
| <b>262</b> | 267623_at   | 214  | 1.3 | 6.7  | 8.1  | 196  | 0.9 | 1.5 | 7.0 | AT2G39650 | expressed protein                                         |
| <b>263</b> | 258117_at   | 39   | 1.4 | 1.6  | 0.9  | 12   | 2.0 | 1.7 | 7.0 | AT3G14700 | expressed protein                                         |
| <b>264</b> | 250024_at   | 166  | 1.6 | 2.0  | 1.6  | 171  | 0.9 | 1.3 | 7.0 | AT5G18270 | NAM (no apical meristem)-related protein                  |
| <b>265</b> | 256177_at   | 39   | 2.2 | 4.0  | 8.5  | 71   | 0.8 | 1.1 | 7.0 | AT1G51620 | protein kinase family                                     |
| <b>266</b> | 250435_at   | 464  | 1.0 | 4.0  | 5.0  | 330  | 1.0 | 1.7 | 6.9 | AT5G10380 | C3HC4-type zinc finger protein family                     |
| <b>267</b> | 252483_at   | 116  | 1.8 | 9.4  | 9.1  | 139  | 0.9 | 1.7 | 6.9 | AT3G46600 | scarecrow transcription factor family                     |
| <b>268</b> | 250267_at   | 152  | 0.7 | 1.0  | 1.9  | 115  | 0.7 | 1.0 | 6.9 | AT5G12930 | expressed protein                                         |
| <b>269</b> | 247704_at   | 57   | 1.5 | 3.4  | 3.2  | 29   | 1.9 | 0.9 | 6.9 | AT5G59510 | expressed protein                                         |
| <b>270</b> | 258682_at   | 206  | 1.0 | 5.9  | 6.8  | 188  | 1.3 | 2.1 | 6.9 | AT3G08720 | ribosomal-protein S6 kinase (ATPK19) -related             |
| <b>271</b> | 251895_at   | 464  | 2.2 | 2.8  | 2.5  | 312  | 1.2 | 1.9 | 6.9 | AT3G54420 | glycosyl hydrolase family 19 (class IV chitinase)         |
| <b>272</b> | 255543_at   | 1163 | 1.4 | 3.7  | 3.0  | 839  | 0.9 | 2.0 | 6.9 | AT4G01870 | expressed protein                                         |
| <b>273</b> | 258452_at   | 1943 | 2.2 | 4.0  | 3.1  | 1149 | 1.2 | 2.2 | 6.9 | AT3G22370 | alternative oxidase 1a, mitochondrial (AOX1A)             |
| <b>274</b> | 256178_s_at | 350  | 1.3 | 1.1  | 1.1  | 250  | 0.9 | 1.7 | 6.8 | AT1G51780 | auxin conjugate hydrolase/IAA-amino acid hydrolase (ILL5) |
| <b>275</b> | 263182_at   | 88   | 1.4 | 13.9 | 47.9 | 104  | 1.0 | 1.0 | 6.8 | AT1G05575 | expressed protein                                         |
| <b>276</b> | 261027_at   | 98   | 1.6 | 3.3  | 2.7  | 139  | 0.8 | 1.5 | 6.8 | AT1G01340 | cyclic nucleotide-regulated ion channel (CNGC10/ACBK1)    |
| <b>277</b> | 249489_at   | 122  | 2.7 | 2.7  | 1.6  | 31   | 2.9 | 2.6 | 6.8 | AT5G39090 | transferase family                                        |
| <b>278</b> | 250287_at   | 291  | 0.9 | 1.1  | 1.2  | 149  | 1.2 | 1.6 | 6.7 | AT5G13330 | AP2 domain transcription factor family                    |
| <b>279</b> | 266841_at   | 124  | 1.6 | 1.3  | 0.6  | 54   | 0.5 | 1.3 | 6.7 | AT2G26150 | heat shock transcription factor family                    |
| <b>280</b> | 255317_at   | 66   | 1.1 | 1.2  | 1.5  | 43   | 2.2 | 5.2 | 6.7 | AT4G04180 | vesicle transfer ATPase -related                          |
| <b>281</b> | 258606_at   | 35   | 2.5 | 5.3  | 12.4 | 32   | 1.0 | 0.4 | 6.7 | AT3G02840 | expressed protein                                         |
| <b>282</b> | 249188_at   | 105  | 1.6 | 4.3  | 5.4  | 143  | 0.8 | 0.6 | 6.7 | AT5G42830 | hydroxycinnamoyl benzoyltransferase-related               |
| <b>283</b> | 253890_s_at | 592  | 1.5 | 1.9  | 1.5  | 577  | 1.0 | 2.6 | 6.7 | AT5G54100 | expressed protein                                         |
| <b>284</b> | 258650_at   | 296  | 1.6 | 2.1  | 1.8  | 230  | 0.9 | 1.7 | 6.6 | AT3G09830 | protein kinase, putative                                  |
| <b>285</b> | 247177_at   | 70   | 0.8 | 3.9  | 7.5  | 84   | 1.2 | 0.9 | 6.6 | AT5G65300 | expressed protein                                         |
| <b>286</b> | 266294_at   | 1771 | 0.8 | 0.4  | 0.4  | 171  | 1.0 | 2.9 | 6.6 | AT2G29500 | small heat shock protein -related                         |
| <b>287</b> | 265499_at   | 237  | 2.0 | 3.6  | 2.9  | 161  | 0.8 | 1.5 | 6.6 | AT2G15480 | glucosyltransferase -related                              |
| <b>288</b> | 262381_at   | 132  | 1.8 | 10.8 | 13.5 | 151  | 1.1 | 1.5 | 6.6 | AT1G72900 | disease resistance protein (TIR-NBS class), putative      |



|            |           |      |     |      |      |     |     |     |     |           |                                                           |
|------------|-----------|------|-----|------|------|-----|-----|-----|-----|-----------|-----------------------------------------------------------|
| <b>289</b> | 250781_at | 458  | 4.3 | 4.5  | 2.6  | 228 | 1.0 | 1.6 | 6.6 | AT5G05410 | DRE binding protein (DREB2A)                              |
| <b>290</b> | 249918_at | 1476 | 2.1 | 4.0  | 5.7  | 890 | 1.0 | 2.0 | 6.6 | AT5G19240 | expressed protein                                         |
| <b>291</b> | 245662_at | 94   | 0.7 | 4.3  | 5.0  | 90  | 1.2 | 2.0 | 6.5 | AT1G28190 | expressed protein                                         |
| <b>292</b> | 266618_at | 113  | 1.8 | 3.5  | 2.5  | 120 | 0.9 | 1.7 | 6.5 | AT2G35480 | expressed protein                                         |
| <b>293</b> | 252470_at | 137  | 1.3 | 1.8  | 2.0  | 121 | 1.0 | 1.3 | 6.5 | AT3G46930 | protein kinase family                                     |
| <b>294</b> | 265086_at | 35   | 1.1 | 1.4  | 2.1  | 26  | 4.0 | 4.7 | 6.5 | AT1G03770 | C3HC4-type zinc finger protein family                     |
| <b>295</b> | 249527_at | 101  | 1.0 | 1.5  | 1.4  | 59  | 1.2 | 1.0 | 6.5 | AT5G38710 | proline oxidase, mitochondrial precursor -related protein |
| <b>296</b> | 250279_at | 414  | 1.4 | 2.4  | 2.5  | 485 | 1.0 | 1.1 | 6.5 | AT5G13200 | GRAM domain-containing protein                            |
| <b>297</b> | 254592_at | 217  | 1.2 | 3.7  | 4.6  | 200 | 1.1 | 1.5 | 6.4 | AT4G18880 | heat shock transcription factor 21                        |
| <b>298</b> | 259015_at | 125  | 1.3 | 2.2  | 3.3  | 75  | 2.5 | 5.0 | 6.4 | AT3G07350 | expressed protein                                         |
| <b>299</b> | 247287_at | 224  | 1.5 | 1.9  | 1.7  | 140 | 1.1 | 1.1 | 6.4 | AT5G64230 | expressed protein                                         |
| <b>300</b> | 254652_at | 39   | 0.7 | 2.0  | 2.5  | 23  | 1.3 | 2.0 | 6.4 | AT4G18170 | WRKY family transcription factor                          |
| <b>301</b> | 254069_at | 48   | 0.9 | 4.3  | 2.2  | 25  | 3.7 | 3.1 | 6.4 | AT4G25440 | zfdw1 protein                                             |
| <b>302</b> | 264460_at | 329  | 2.5 | 8.9  | 5.5  | 352 | 0.9 | 1.7 | 6.3 | AT1G10170 | expressed protein                                         |
| <b>303</b> | 261063_at | 103  | 1.3 | 3.2  | 4.2  | 107 | 1.4 | 1.6 | 6.3 | AT1G07520 | scarecrow transcription factor family                     |
| <b>304</b> | 253915_at | 413  | 1.3 | 17.5 | 24.3 | 317 | 0.8 | 1.3 | 6.3 | AT4G27280 | calcium-binding EF-hand family protein                    |
| <b>305</b> | 262228_at | 76   | 1.4 | 2.5  | 3.2  | 67  | 0.9 | 1.1 | 6.3 | AT1G68690 | protein kinase family                                     |
| <b>306</b> | 251096_at | 112  | 1.3 | 3.9  | 3.7  | 64  | 1.5 | 1.3 | 6.3 | AT5G01550 | receptor lectin kinase, putative                          |
| <b>307</b> | 246189_at | 341  | 1.3 | 1.4  | 1.2  | 338 | 1.0 | 2.2 | 6.2 | AT5G20910 | C3HC4-type zinc finger protein family                     |
| <b>308</b> | 250665_at | 829  | 1.2 | 1.3  | 1.3  | 51  | 1.7 | 3.1 | 6.2 | AT5G06980 | expressed protein                                         |
| <b>309</b> | 253824_at | 275  | 2.1 | 3.5  | 2.8  | 267 | 0.9 | 1.5 | 6.2 | AT4G27940 | mitochondrial carrier protein family                      |
| <b>310</b> | 247615_at | 39   | 2.0 | 1.3  | 1.1  | 56  | 1.2 | 2.4 | 6.2 | AT5G60250 | hypothetical protein                                      |
| <b>311</b> | 248700_at | 81   | 1.1 | 1.1  | 1.0  | 35  | 1.5 | 2.1 | 6.2 | AT5G48400 | glutamate receptor family (GLR1.2)                        |
| <b>312</b> | 262607_at | 1044 | 1.0 | 1.3  | 1.3  | 435 | 1.0 | 2.2 | 6.2 | AT1G13990 | expressed protein                                         |
| <b>313</b> | 257206_at | 879  | 1.9 | 3.0  | 2.8  | 709 | 1.4 | 2.9 | 6.1 | AT3G16530 | lectin -related                                           |
| <b>314</b> | 253776_at | 348  | 1.0 | 1.0  | 1.2  | 219 | 1.1 | 2.5 | 6.1 | AT4G28390 | mitochondrial ADP,ATP carrier protein, putative           |
| <b>315</b> | 254420_at | 43   | 1.7 | 1.6  | 2.1  | 19  | 2.8 | 1.4 | 6.1 | AT4G21500 | hypothetical protein                                      |
| <b>316</b> | 253104_at | 316  | 1.1 | 2.6  | 2.2  | 446 | 0.9 | 1.4 | 6.1 | AT4G36010 | thaumatin family                                          |
| <b>317</b> | 261187_at | 194  | 1.6 | 1.8  | 1.6  | 181 | 1.0 | 2.5 | 6.1 | AT1G32860 | glycosyl hydrolase family 17                              |
| <b>318</b> | 254784_at | 939  | 1.5 | 6.0  | 7.1  | 966 | 0.9 | 1.2 | 6.1 | AT4G12720 | MutT/nudix family protein                                 |
| <b>319</b> | 256852_at | 262  | 1.0 | 0.8  | 0.4  | 263 | 0.9 | 2.5 | 6.0 | AT3G18610 | nucleolin, putative                                       |
| <b>320</b> | 264912_at | 74   | 1.9 | 2.2  | 0.9  | 55  | 1.5 | 2.2 | 6.0 | AT1G60750 | aldo/keto reductase family                                |
| <b>321</b> | 261474_at | 75   | 2.6 | 3.8  | 5.2  | 73  | 0.7 | 0.7 | 6.0 | AT1G14540 | anionic peroxidase, putative                              |
| <b>322</b> | 262542_at | 278  | 1.0 | 2.2  | 2.2  | 295 | 0.9 | 1.7 | 6.0 | AT1G34180 | No apical meristem (NAM) protein family                   |
| <b>323</b> | 261443_at | 94   | 2.0 | 4.3  | 9.1  | 138 | 0.7 | 1.0 | 6.0 | AT1G28480 | glutaredoxin protein family                               |
| <b>324</b> | 253051_at | 146  | 1.4 | 1.0  | 1.1  | 119 | 1.0 | 1.9 | 6.0 | AT4G37490 | G2/mitotic-specific cyclin (B-like cyclin/CYC1)           |
| <b>325</b> | 265632_at | 56   | 1.3 | 0.9  | 5.9  | 44  | 0.9 | 0.4 | 6.0 | AT2G14290 | F-box protein family                                      |

|            |             |      |      |      |      |      |     |     |     |           |                                                                      |
|------------|-------------|------|------|------|------|------|-----|-----|-----|-----------|----------------------------------------------------------------------|
| <b>326</b> | 260243_at   | 199  | 1.4  | 2.7  | 3.9  | 194  | 0.9 | 1.1 | 5.9 | AT1G63720 | expressed protein                                                    |
| <b>327</b> | 256426_at   | 60   | 1.6  | 4.6  | 3.7  | 91   | 1.0 | 1.5 | 5.9 | AT1G33420 | expressed protein                                                    |
| <b>328</b> | 246777_at   | 94   | 1.2  | 6.7  | 10.1 | 97   | 0.8 | 1.0 | 5.9 | AT5G27420 | RING-H2 zinc finger protein-related                                  |
| <b>329</b> | 266870_at   | 74   | 3.2  | 0.9  | 0.4  | 33   | 2.4 | 2.4 | 5.9 | AT2G44710 | RRM-containing protein                                               |
| <b>330</b> | 260401_at   | 708  | 1.4  | 4.2  | 4.2  | 419  | 1.2 | 1.6 | 5.9 | AT1G69840 | expressed protein                                                    |
| <b>331</b> | 254447_at   | 917  | 2.0  | 2.4  | 1.9  | 512  | 1.1 | 2.2 | 5.9 | AT4G20860 | FAD-linked oxidoreductase family                                     |
| <b>332</b> | 252383_at   | 157  | 1.3  | 1.2  | 1.3  | 162  | 1.3 | 1.6 | 5.9 | AT3G47780 | ABC transporter family protein                                       |
| <b>333</b> | 251336_at   | 42   | 1.5  | 7.3  | 15.5 | 59   | 1.1 | 1.2 | 5.9 | AT3G61190 | BON1-associated protein 1 (BAP1)                                     |
| <b>334</b> | 267357_at   | 173  | 1.4  | 4.2  | 7.5  | 77   | 1.3 | 2.2 | 5.9 | AT2G40000 | nematode-resistance protein -related                                 |
| <b>335</b> | 252862_at   | 143  | 1.4  | 1.2  | 2.0  | 95   | 1.1 | 0.9 | 5.9 | AT4G39830 | L-ascorbate oxidase, putative                                        |
| <b>336</b> | 255341_at   | 24   | 1.4  | 2.1  | 2.2  | 59   | 0.8 | 1.0 | 5.8 | AT4G04500 | receptor-related protein kinase                                      |
| <b>337</b> | 254242_at   | 164  | 1.0  | 2.5  | 1.7  | 94   | 0.9 | 1.2 | 5.8 | AT4G23200 | serine /threonine kinase - like protein                              |
| <b>338</b> | 251259_at   | 382  | 2.4  | 4.9  | 3.4  | 296  | 1.1 | 1.4 | 5.8 | AT3G62260 | protein phosphatase 2C (PP2C), putative                              |
| <b>339</b> | 255884_at   | 55   | 1.7  | 7.5  | 9.4  | 71   | 1.0 | 1.0 | 5.7 | AT1G20310 | expressed protein                                                    |
| <b>340</b> | 255406_at   | 67   | 0.8  | 1.6  | 1.7  | 43   | 1.4 | 1.5 | 5.7 | AT4G03450 | expressed protein                                                    |
| <b>341</b> | 248668_at   | 162  | 3.0  | 2.8  | 2.1  | 151  | 1.5 | 3.2 | 5.7 | AT5G48720 | hypothetical protein                                                 |
| <b>342</b> | 247554_at   | 444  | 1.4  | 1.7  | 1.6  | 314  | 1.0 | 1.1 | 5.7 | AT5G61010 | expressed protein                                                    |
| <b>343</b> | 249125_at   | 871  | 1.1  | 2.1  | 2.2  | 676  | 1.1 | 2.3 | 5.7 | AT5G43450 | 2-oxoglutarate-dependent dioxygenase, putative                       |
| <b>344</b> | 254926_at   | 263  | 0.9  | 5.3  | 6.5  | 262  | 0.8 | 1.0 | 5.7 | AT4G11280 | 1-aminocyclopropane-1-carboxylate synthase 6 (ACC synthase 6) (ACS6) |
| <b>345</b> | 265290_at   | 150  | 1.6  | 1.2  | 0.7  | 78   | 1.4 | 2.1 | 5.7 | AT2G22590 | glycosyltransferase family                                           |
| <b>346</b> | 257184_at   | 70   | 1.0  | 1.4  | 1.5  | 84   | 0.6 | 1.3 | 5.6 | AT3G13090 | ABC transporter protein MRP8                                         |
| <b>347</b> | 255921_at   | 56   | 1.2  | 1.0  | 1.1  | 43   | 1.2 | 1.6 | 5.6 | AT1G22240 | pumilio-family RNA-binding protein, putative                         |
| <b>348</b> | 256793_at   | 207  | 1.4  | 3.9  | 6.2  | 265  | 0.9 | 0.9 | 5.6 | AT3G22160 | expressed protein                                                    |
| <b>349</b> | 246282_at   | 92   | 1.1  | 1.8  | 1.1  | 154  | 0.8 | 2.7 | 5.6 | AT4G36580 | ATPase-related protein                                               |
| <b>350</b> | 246295_at   | 87   | 0.8  | 0.8  | 1.0  | 53   | 0.7 | 4.2 | 5.6 | AT3G56690 | calmodulin-binding protein                                           |
| <b>351</b> | 265200_s_at | 139  | 4.7  | 13.3 | 11.6 | 144  | 1.4 | 2.6 | 5.6 | AT2G36790 | glucosyl transferase -related                                        |
| <b>352</b> | 264674_at   | 527  | 1.2  | 1.4  | 1.4  | 500  | 0.9 | 2.2 | 5.6 | AT1G09815 | expressed protein                                                    |
| <b>353</b> | 262731_at   | 17   | 1.7  | 7.1  | 8.9  | 23   | 0.7 | 0.9 | 5.5 | AT1G16420 | hypothetical protein common family                                   |
| <b>354</b> | 245879_at   | 123  | 1.3  | 1.2  | 1.3  | 157  | 1.0 | 2.3 | 5.5 | AT5G09420 | subunit of TOC complex -related                                      |
| <b>355</b> | 254241_at   | 70   | 2.2  | 5.8  | 5.4  | 85   | 1.2 | 0.8 | 5.5 | AT4G23190 | serine/threonine kinase - like protein                               |
| <b>356</b> | 265260_at   | 87   | 1.1  | 1.2  | 1.6  | 80   | 1.1 | 1.0 | 5.5 | AT2G43000 | No apical meristem (NAM) protein family                              |
| <b>357</b> | 248896_at   | 65   | 1.2  | 1.5  | 1.2  | 75   | 0.8 | 1.2 | 5.5 | AT5G46350 | WRKY family transcription factor                                     |
| <b>358</b> | 259992_at   | 339  | 1.1  | 4.2  | 3.6  | 253  | 1.0 | 1.2 | 5.5 | AT1G67970 | heat shock transcription factor 5 (HSF5)                             |
| <b>359</b> | 250934_at   | 1027 | 1.0  | 1.2  | 1.3  | 1212 | 1.0 | 2.2 | 5.5 | AT5G03030 | DnaJ domain-containing protein                                       |
| <b>360</b> | 261892_at   | 125  | 1.2  | 8.7  | 14.5 | 121  | 0.6 | 0.9 | 5.5 | AT1G80840 | WRKY family transcription factor                                     |
| <b>361</b> | 254443_at   | 34   | 17.2 | 16.5 | 14.4 | 54   | 1.6 | 3.7 | 5.5 | AT4G21070 | BRCT domain-containing protein                                       |
| <b>362</b> | 248910_at   | 1272 | 2.5  | 1.3  | 1.4  | 80   | 1.4 | 2.0 | 5.5 | AT5G45820 | CBL-interacting protein kinase 20                                    |

|            |             |      |     |      |      |      |     |     |     |           |                                                       |
|------------|-------------|------|-----|------|------|------|-----|-----|-----|-----------|-------------------------------------------------------|
| <b>363</b> | 247800_at   | 202  | 0.7 | 2.2  | 2.4  | 385  | 1.2 | 3.3 | 5.5 | AT5G58570 | expressed protein                                     |
| <b>364</b> | 257840_at   | 84   | 3.1 | 14.2 | 16.0 | 118  | 0.9 | 1.1 | 5.4 | AT3G25250 | protein kinase family                                 |
| <b>365</b> | 259520_at   | 58   | 0.6 | 0.1  | 0.1  | 22   | 4.0 | 4.0 | 5.4 | AT1G12320 | expressed protein                                     |
| <b>366</b> | 250983_at   | 50   | 0.5 | 0.7  | 2.4  | 165  | 0.4 | 0.4 | 5.4 | AT5G02780 | ln2-1 protein, putative                               |
| <b>367</b> | 246368_at   | 138  | 1.4 | 1.2  | 1.0  | 137  | 0.8 | 1.0 | 5.4 | AT1G51890 | leucine rich repeat protein kinase, putative          |
| <b>368</b> | 264774_at   | 312  | 1.3 | 2.0  | 2.4  | 115  | 0.8 | 1.4 | 5.4 | AT1G22890 | hypothetical protein                                  |
| <b>369</b> | 263374_at   | 501  | 1.2 | 1.0  | 0.8  | 197  | 1.3 | 1.7 | 5.4 | AT2G20560 | heat shock protein, putative                          |
| <b>370</b> | 245306_at   | 2489 | 7.8 | 7.8  | 5.2  | 444  | 1.5 | 3.8 | 5.4 | AT4G14690 | expressed protein                                     |
| <b>371</b> | 247707_at   | 182  | 1.4 | 5.0  | 4.3  | 153  | 1.2 | 1.2 | 5.4 | AT5G59450 | scarecrow-like transcription factor 11 (SCL11)        |
| <b>372</b> | 262518_at   | 726  | 1.4 | 4.7  | 2.8  | 1255 | 1.0 | 3.1 | 5.4 | AT1G17170 | glutathione transferase, putative                     |
| <b>373</b> | 261544_at   | 172  | 1.1 | 1.4  | 0.9  | 63   | 1.6 | 2.7 | 5.4 | AT1G63540 | hypothetical protein                                  |
| <b>374</b> | 257623_at   | 160  | 1.5 | 1.5  | 1.4  | 154  | 1.1 | 1.2 | 5.4 | AT3G26210 | cytochrome P450 71B23                                 |
| <b>375</b> | 246831_at   | 1720 | 1.1 | 1.1  | 0.9  | 747  | 0.9 | 1.3 | 5.3 | AT5G26340 | hexose transporter, putative                          |
| <b>376</b> | 258608_at   | 251  | 1.4 | 1.9  | 3.1  | 123  | 1.0 | 1.6 | 5.3 | AT3G03020 | expressed protein                                     |
| <b>377</b> | 259037_at   | 876  | 1.1 | 0.8  | 0.6  | 318  | 1.2 | 2.0 | 5.3 | AT3G09350 | expressed protein                                     |
| <b>378</b> | 256252_at   | 128  | 2.0 | 2.2  | 1.2  | 333  | 1.1 | 1.0 | 5.3 | AT3G11340 | glycosyltransferase family                            |
| <b>379</b> | 260037_at   | 215  | 1.5 | 5.8  | 8.9  | 172  | 0.9 | 1.3 | 5.3 | AT1G68840 | AP2 domain protein RAP2.8 (RAV2)                      |
| <b>380</b> | 258786_at   | 535  | 1.4 | 4.0  | 4.8  | 474  | 0.9 | 1.0 | 5.3 | AT3G11820 | syntaxin of plants SYP121                             |
| <b>381</b> | 254416_at   | 115  | 1.3 | 1.1  | 1.3  | 106  | 0.6 | 0.6 | 5.3 | AT4G21380 | receptor-related serine/threonine protein kinase ARK3 |
| <b>382</b> | 252734_at   | 24   | 1.7 | 28.7 | 62.9 | 52   | 0.8 | 0.4 | 5.3 | AT3G43160 | hypothetical protein                                  |
| <b>383</b> | 267493_at   | 60   | 1.1 | 1.9  | 1.5  | 32   | 1.5 | 1.4 | 5.3 | AT2G30400 | hypothetical protein                                  |
| <b>384</b> | 248164_at   | 91   | 1.4 | 16.5 | 30.6 | 127  | 0.7 | 0.7 | 5.3 | AT5G54490 | calcium-binding protein, putative                     |
| <b>385</b> | 249377_at   | 296  | 1.7 | 4.3  | 3.1  | 337  | 1.1 | 1.4 | 5.2 | AT5G40690 | expressed protein                                     |
| <b>386</b> | 251054_at   | 182  | 1.8 | 5.6  | 6.1  | 152  | 0.7 | 0.8 | 5.2 | AT5G01540 | receptor lectin kinase, putative                      |
| <b>387</b> | 263128_at   | 2369 | 2.2 | 2.0  | 1.5  | 641  | 1.0 | 1.7 | 5.2 | AT1G78600 | CONSTANS B-box zinc finger family protein             |
| <b>388</b> | 246943_at   | 308  | 1.7 | 2.3  | 2.1  | 191  | 1.1 | 1.0 | 5.2 | AT5G25440 | protein kinase family                                 |
| <b>389</b> | 252928_at   | 123  | 1.5 | 2.5  | 3.4  | 118  | 0.9 | 1.0 | 5.2 | AT4G38940 | Kelch repeat containing F-box protein family          |
| <b>390</b> | 264951_at   | 115  | 1.7 | 1.7  | 1.7  | 89   | 0.9 | 1.4 | 5.2 | AT1G76970 | expressed protein                                     |
| <b>391</b> | 247176_at   | 748  | 0.9 | 1.2  | 1.4  | 435  | 1.4 | 2.4 | 5.2 | AT5G65110 | acyl-CoA oxidase (gb AAC13497.1)                      |
| <b>392</b> | 256633_at   | 160  | 0.8 | 4.7  | 8.2  | 130  | 1.2 | 0.8 | 5.2 | AT3G28340 | galactinol synthase, putative                         |
| <b>393</b> | 256877_at   | 386  | 1.7 | 2.6  | 3.2  | 365  | 0.9 | 1.4 | 5.1 | AT3G26470 | expressed protein                                     |
| <b>394</b> | 259626_at   | 605  | 1.6 | 4.7  | 4.7  | 520  | 0.9 | 1.0 | 5.1 | AT1G42990 | bZIP family transcription factor                      |
| <b>395</b> | 265428_at   | 85   | 1.4 | 1.0  | 1.1  | 77   | 0.6 | 1.1 | 5.1 | AT2G20720 | expressed protein                                     |
| <b>396</b> | 255923_at   | 215  | 1.2 | 1.2  | 1.0  | 207  | 1.2 | 1.2 | 5.1 | AT1G22180 | expressed protein                                     |
| <b>397</b> | 263823_s_at | 169  | 2.2 | 4.0  | 2.9  | 147  | 1.0 | 1.6 | 5.1 | AT2G40350 | AP2 domain transcription factor, putative (DREB2)     |
| <b>398</b> | 264746_at   | 378  | 1.6 | 3.1  | 2.0  | 422  | 1.2 | 1.1 | 5.1 | AT1G62300 | WRKY family transcription factor                      |
| <b>399</b> | 255011_at   | 903  | 2.3 | 3.0  | 2.4  | 509  | 1.1 | 2.5 | 5.0 | AT4G10040 | cytochrome c                                          |

|     |             |      |     |     |      |      |     |     |     |           |                                                                                                                                                            |
|-----|-------------|------|-----|-----|------|------|-----|-----|-----|-----------|------------------------------------------------------------------------------------------------------------------------------------------------------------|
| 400 | 246944_at   | 746  | 1.3 | 1.5 | 1.5  | 300  | 1.2 | 1.9 | 5.0 | AT5G25450 | ubiquinol--cytochrome-c reductase-related protein                                                                                                          |
| 401 | 253643_at   | 92   | 1.3 | 5.5 | 9.9  | 97   | 0.9 | 0.9 | 5.0 | AT4G29780 | expressed protein                                                                                                                                          |
| 402 | 251970_at   | 61   | 0.5 | 0.9 | 0.6  | 52   | 0.5 | 0.9 | 5.0 | AT3G53150 | glucosyltransferase - like protein                                                                                                                         |
| 403 | 245313_at   | 412  | 1.2 | 1.6 | 1.5  | 360  | 1.1 | 1.4 | 5.0 | AT4G15420 | PRLI-interacting factor K                                                                                                                                  |
| 404 | 255599_at   | 110  | 0.9 | 2.7 | 3.8  | 85   | 1.1 | 1.5 | 5.0 | AT4G01010 | cyclic nucleotide-regulated ion channel, putative (CNGC13)                                                                                                 |
| 405 | 260754_at   | 26   | 1.2 | 3.5 | 4.2  | 68   | 0.4 | 1.1 | 5.0 | AT1G49000 | expressed protein                                                                                                                                          |
| 406 | 255259_at   | 640  | 1.5 | 1.5 | 1.1  | 653  | 1.0 | 1.6 | 5.0 | AT4G05020 | NADH dehydrogenase - related                                                                                                                               |
| 407 | 247215_at   | 24   | 2.8 | 6.0 | 23.5 | 65   | 1.2 | 0.9 | 5.0 | AT5G64905 | expressed protein                                                                                                                                          |
| 408 | 252273_at   | 171  | 0.5 | 0.9 | 0.7  | 49   | 2.8 | 3.3 | 4.9 | AT3G49660 | transducin / WD-40 repeat protein family                                                                                                                   |
| 409 | 261300_at   | 68   | 1.3 | 1.0 | 0.3  | 41   | 3.0 | 3.6 | 4.9 | AT1G48560 | expressed protein                                                                                                                                          |
| 410 | 258201_at   | 168  | 1.1 | 1.5 | 1.1  | 135  | 1.0 | 1.6 | 4.9 | AT3G13910 | expressed protein                                                                                                                                          |
| 411 | 252993_at   | 927  | 1.0 | 1.4 | 1.4  | 681  | 1.0 | 1.6 | 4.9 | AT4G38540 | monooxygenase 2 (MO2)                                                                                                                                      |
| 412 | 254289_at   | 63   | 1.8 | 2.8 | 2.5  | 78   | 1.5 | 1.3 | 4.9 | AT4G22980 | hypothetical protein                                                                                                                                       |
| 413 | 254014_at   | 46   | 1.4 | 2.4 | 1.7  | 53   | 1.0 | 1.0 | 4.9 | AT4G26120 | NPR1 like protein                                                                                                                                          |
| 414 | 250028_at   | 537  | 1.7 | 1.6 | 1.2  | 464  | 1.0 | 1.8 | 4.9 | AT5G18130 | expressed protein                                                                                                                                          |
| 415 | 266836_at   | 86   | 0.7 | 0.9 | 0.6  | 27   | 3.1 | 2.9 | 4.9 | AT2G26000 | hypothetical protein                                                                                                                                       |
| 416 | 248442_at   | 480  | 1.0 | 1.0 | 0.8  | 307  | 1.1 | 2.1 | 4.9 | AT5G51280 | DEAD-box protein abstrakt, putative                                                                                                                        |
| 417 | 248703_at   | 120  | 1.8 | 2.0 | 1.0  | 124  | 0.8 | 2.5 | 4.9 | AT5G48430 | dermal glyco protein precursor, extracellular-related                                                                                                      |
| 418 | 261719_at   | 156  | 1.7 | 2.4 | 2.9  | 160  | 0.9 | 0.9 | 4.9 | AT1G18380 | hypothetical protein                                                                                                                                       |
| 419 | 256183_at   | 174  | 1.1 | 4.6 | 6.1  | 192  | 1.0 | 1.0 | 4.9 | AT1G51660 | mitogen-activated protein kinase kinase (MAPKK), putative (MKK4)                                                                                           |
| 420 | 261748_at   | 261  | 1.0 | 2.5 | 3.4  | 166  | 1.2 | 1.0 | 4.8 | AT1G76070 | expressed protein                                                                                                                                          |
| 421 | 255502_at   | 303  | 1.3 | 3.3 | 2.9  | 194  | 0.9 | 1.1 | 4.8 | AT4G02410 | contains similarity to a protein kinase domain (Pfam: pkinase.hmm, score: 166.20) and to legume lectins beta domain (Pfam: lectin_legB.hmm, score: 139.32) |
| 422 | 258592_at   | 89   | 1.1 | 1.2 | 1.0  | 43   | 3.5 | 3.4 | 4.8 | AT3G04130 | pentatricopeptide (PPR) repeat-containing protein                                                                                                          |
| 423 | 247912_at   | 61   | 1.0 | 0.9 | 0.9  | 42   | 1.6 | 1.8 | 4.8 | AT5G57480 | hypothetical protein                                                                                                                                       |
| 424 | 257264_at   | 566  | 1.0 | 1.5 | 2.0  | 203  | 1.0 | 1.9 | 4.8 | AT3G22060 | receptor protein kinase-related                                                                                                                            |
| 425 | 261798_at   | 102  | 0.6 | 0.4 | 0.4  | 33   | 3.4 | 2.8 | 4.8 | AT1G30460 | cleavage and polyadenylation specificity factor 30 kDa subunit - related                                                                                   |
| 426 | 252300_at   | 84   | 1.8 | 1.9 | 2.0  | 40   | 2.0 | 2.7 | 4.8 | AT3G49160 | pyruvate kinase -related protein                                                                                                                           |
| 427 | 260567_at   | 581  | 1.1 | 1.2 | 1.2  | 378  | 0.9 | 1.8 | 4.8 | AT2G43820 | glycosyltransferase family                                                                                                                                 |
| 428 | 264400_at   | 3838 | 1.2 | 1.6 | 1.0  | 966  | 1.2 | 2.5 | 4.8 | AT1G61800 | glucose-6-phosphate/phosphate-translocator, putative                                                                                                       |
| 429 | 257466_at   | 67   | 0.8 | 1.1 | 1.5  | 52   | 1.3 | 1.2 | 4.8 | AT1G62840 | hypothetical protein                                                                                                                                       |
| 430 | 266371_at   | 1590 | 0.9 | 2.9 | 3.2  | 1612 | 1.0 | 1.7 | 4.8 | AT2G41410 | calmodulin, putative                                                                                                                                       |
| 431 | 262119_s_at | 3524 | 1.5 | 1.8 | 1.8  | 2618 | 1.0 | 2.6 | 4.7 | AT1G02930 | glutathione transferase, putative                                                                                                                          |
| 432 | 250910_at   | 258  | 1.6 | 5.7 | 4.0  | 218  | 1.0 | 1.2 | 4.7 | AT5G03720 | heat shock transcription factor family                                                                                                                     |
| 433 | 254063_at   | 197  | 1.2 | 3.4 | 2.7  | 147  | 0.9 | 1.1 | 4.7 | AT4G25390 | protein kinase family                                                                                                                                      |

|            |             |      |     |     |     |      |     |     |     |           |                                                                                |
|------------|-------------|------|-----|-----|-----|------|-----|-----|-----|-----------|--------------------------------------------------------------------------------|
| <b>434</b> | 245324_at   | 499  | 1.3 | 2.7 | 2.5 | 707  | 1.0 | 1.0 | 4.7 | AT4G17260 | L-lactate dehydrogenase (LDH), putative                                        |
| <b>435</b> | 248611_at   | 95   | 1.5 | 2.7 | 2.2 | 70   | 1.5 | 1.3 | 4.7 | AT5G49520 | WRKY family transcription factor                                               |
| <b>436</b> | 257185_at   | 42   | 1.7 | 2.1 | 2.4 | 70   | 1.3 | 2.0 | 4.7 | AT3G13100 | ABC transporter family protein                                                 |
| <b>437</b> | 264024_at   | 575  | 1.2 | 1.5 | 1.0 | 534  | 1.2 | 1.8 | 4.7 | AT2G21180 | expressed protein                                                              |
| <b>438</b> | 245885_at   | 1357 | 1.2 | 1.2 | 0.9 | 982  | 1.1 | 2.1 | 4.7 | AT5G09440 | expressed protein                                                              |
| <b>439</b> | 245866_s_at | 429  | 1.7 | 4.3 | 5.9 | 194  | 1.1 | 0.9 | 4.7 | AT1G57990 | purine permease-related                                                        |
| <b>440</b> | 254432_at   | 1441 | 1.6 | 2.2 | 2.2 | 995  | 0.9 | 1.8 | 4.7 | AT4G20830 | FAD-linked oxidoreductase family                                               |
| <b>441</b> | 254390_at   | 36   | 1.6 | 2.6 | 2.0 | 61   | 1.5 | 1.6 | 4.7 | AT4G21940 | calcium-dependent protein kinase, putative (CDPK)                              |
| <b>442</b> | 258507_at   | 376  | 1.6 | 2.8 | 2.3 | 296  | 1.0 | 1.9 | 4.6 | AT3G06500 | neutral invertase -related                                                     |
| <b>443</b> | 253173_at   | 164  | 1.2 | 1.5 | 1.8 | 146  | 0.8 | 0.9 | 4.6 | AT4G35110 | expressed protein                                                              |
| <b>444</b> | 249467_at   | 121  | 1.1 | 2.0 | 2.7 | 49   | 1.8 | 1.4 | 4.6 | AT5G39610 | NAM / CUC2 - like protein                                                      |
| <b>445</b> | 265184_at   | 107  | 1.6 | 4.6 | 5.9 | 98   | 1.1 | 1.2 | 4.6 | AT1G23710 | expressed protein                                                              |
| <b>446</b> | 246988_at   | 151  | 1.8 | 1.6 | 1.3 | 105  | 1.0 | 0.9 | 4.6 | AT5G67340 | armadillo repeat containing protein                                            |
| <b>447</b> | 247293_at   | 481  | 0.9 | 0.8 | 0.6 | 165  | 1.2 | 1.7 | 4.6 | AT5G64510 | expressed protein                                                              |
| <b>448</b> | 252864_at   | 154  | 1.2 | 1.5 | 0.9 | 133  | 1.2 | 2.1 | 4.6 | AT4G39740 | expressed protein                                                              |
| <b>449</b> | 260015_at   | 47   | 2.0 | 3.2 | 3.6 | 55   | 1.1 | 0.9 | 4.6 | AT1G67980 | caffeoyl-CoA 3-O-methyltransferase, putative                                   |
| <b>450</b> | 247339_at   | 35   | 1.0 | 1.0 | 2.3 | 59   | 1.7 | 2.2 | 4.5 | AT5G63690 | hypothetical protein                                                           |
| <b>451</b> | 250821_at   | 143  | 1.3 | 2.0 | 2.0 | 124  | 1.4 | 1.0 | 4.5 | AT5G05190 | expressed protein                                                              |
| <b>452</b> | 260405_at   | 36   | 1.2 | 3.3 | 5.0 | 59   | 0.3 | 1.2 | 4.5 | AT1G69930 | glutathione transferase, putative                                              |
| <b>453</b> | 253455_at   | 2035 | 1.4 | 2.1 | 1.8 | 1548 | 1.0 | 1.5 | 4.5 | AT4G32020 | expressed protein                                                              |
| <b>454</b> | 252114_at   | 463  | 0.9 | 1.3 | 1.5 | 253  | 0.9 | 1.4 | 4.5 | AT3G51450 | strictosidine synthase-related                                                 |
| <b>455</b> | 264616_at   | 102  | 1.1 | 1.4 | 1.4 | 106  | 0.8 | 1.2 | 4.5 | AT2G17740 | CHP-rich zinc finger protein, putative                                         |
| <b>456</b> | 248821_at   | 227  | 0.9 | 2.4 | 3.1 | 229  | 0.9 | 1.1 | 4.5 | AT5G47070 | protein kinase, putative                                                       |
| <b>457</b> | 265075_at   | 867  | 2.0 | 4.8 | 5.1 | 813  | 1.2 | 1.1 | 4.5 | AT1G55450 | expressed protein                                                              |
| <b>458</b> | 248981_at   | 155  | 1.2 | 4.4 | 3.6 | 157  | 1.2 | 1.7 | 4.5 | AT5G45110 | regulatory protein NPR1-related; transcription factor inhibitor I kappa B-like |
| <b>459</b> | 258926_s_at | 205  | 1.5 | 1.6 | 1.1 | 184  | 1.3 | 2.4 | 4.5 | AT3G10490 | expressed protein                                                              |
| <b>460</b> | 245247_at   | 463  | 1.0 | 3.0 | 3.0 | 355  | 1.2 | 1.3 | 4.5 | AT4G17230 | scarecrow-like transcription factor 13 (SCL13)                                 |
| <b>461</b> | 250335_at   | 657  | 1.6 | 2.0 | 2.0 | 231  | 1.0 | 1.5 | 4.5 | AT5G11650 | hydrolase, alpha/beta fold family                                              |
| <b>462</b> | 264948_at   | 119  | 1.3 | 0.8 | 0.8 | 101  | 1.3 | 2.8 | 4.4 | AT1G77050 | DEAD/DEAH box helicase, putative                                               |
| <b>463</b> | 265111_at   | 3695 | 1.2 | 1.1 | 1.1 | 309  | 1.1 | 2.5 | 4.4 | AT1G62510 | protease inhibitor/seed storage/lipid transfer protein (LTP) family            |
| <b>464</b> | 265100_at   | 113  | 0.9 | 1.0 | 1.1 | 89   | 1.5 | 2.3 | 4.4 | AT1G31010 | expressed protein                                                              |
| <b>465</b> | 252278_at   | 302  | 1.1 | 3.3 | 3.7 | 249  | 1.2 | 1.3 | 4.4 | AT3G49530 | No apical meristem (NAM) protein family                                        |
| <b>466</b> | 258133_at   | 847  | 1.5 | 1.5 | 1.4 | 525  | 1.0 | 1.4 | 4.4 | AT3G24500 | ethylene-responsive transcriptional coactivator -related                       |
| <b>467</b> | 248834_at   | 154  | 1.0 | 1.2 | 1.0 | 135  | 0.9 | 1.6 | 4.4 | AT5G47090 | expressed protein                                                              |
| <b>468</b> | 260772_at   | 572  | 1.1 | 2.4 | 2.5 | 429  | 1.0 | 1.3 | 4.4 | AT1G49050 | expressed protein                                                              |

|     |             |      |     |     |     |      |     |     |     |           |                                                                        |
|-----|-------------|------|-----|-----|-----|------|-----|-----|-----|-----------|------------------------------------------------------------------------|
| 469 | 267288_at   | 188  | 1.6 | 2.6 | 3.3 | 151  | 0.9 | 1.2 | 4.4 | AT2G23680 | cold acclimation protein WCOR413 ( <i>Triticum aestivum</i> ) -related |
| 470 | 258670_at   | 70   | 2.0 | 0.7 | 1.1 | 69   | 1.0 | 1.1 | 4.4 | AT3G08810 | Kelch repeat containing F-box protein family                           |
| 471 | 248462_at   | 934  | 1.2 | 1.1 | 1.0 | 705  | 1.0 | 2.1 | 4.4 | AT5G50960 | nucleotide-binding protein                                             |
| 472 | 251869_at   | 688  | 1.3 | 1.2 | 1.4 | 75   | 1.1 | 2.3 | 4.4 | AT3G54500 | expressed protein                                                      |
| 473 | 266752_at   | 441  | 1.4 | 2.2 | 1.4 | 488  | 0.9 | 1.3 | 4.4 | AT2G47000 | P-glycoprotein, putative                                               |
| 474 | 250289_at   | 1688 | 1.5 | 3.1 | 4.0 | 1299 | 1.0 | 1.2 | 4.4 | AT5G13190 | expressed protein                                                      |
| 475 | 248101_at   | 342  | 1.2 | 1.7 | 1.4 | 446  | 1.1 | 2.4 | 4.4 | AT5G55200 | chaperone GrpE-related protein                                         |
| 476 | 255742_at   | 243  | 1.4 | 3.1 | 2.9 | 322  | 1.2 | 2.0 | 4.4 | AT1G25560 | AP2 domain transcription factor, putative                              |
| 477 | 249780_at   | 151  | 1.4 | 2.6 | 2.5 | 237  | 0.9 | 1.6 | 4.4 | AT5G24240 | ubiquitin family                                                       |
| 478 | 257149_at   | 476  | 1.0 | 1.2 | 1.3 | 770  | 0.8 | 2.3 | 4.4 | AT3G27280 | prohibitin -related                                                    |
| 479 | 248749_at   | 706  | 1.3 | 1.6 | 1.0 | 574  | 1.0 | 1.7 | 4.3 | AT5G47880 | eukaryotic release factor 1 homolog (gb AAA91169.1)                    |
| 480 | 266396_at   | 253  | 0.9 | 1.7 | 3.6 | 209  | 1.0 | 1.0 | 4.3 | AT2G38790 | expressed protein                                                      |
| 481 | 255895_at   | 475  | 1.5 | 2.5 | 3.2 | 211  | 1.1 | 1.8 | 4.3 | AT1G17990 | 12-oxophytodienoate reductase, putative                                |
| 482 | 247989_at   | 1567 | 1.3 | 1.7 | 1.3 | 1528 | 1.1 | 2.2 | 4.3 | AT5G56350 | pyruvate kinase, putative                                              |
| 483 | 254819_at   | 180  | 1.4 | 0.9 | 0.7 | 102  | 2.2 | 2.7 | 4.3 | AT4G12500 | protease inhibitor/seed storage/lipid transfer protein (LTP) family    |
| 484 | 265387_at   | 205  | 1.3 | 2.4 | 2.5 | 108  | 1.2 | 2.0 | 4.3 | AT2G20670 | expressed protein                                                      |
| 485 | 259312_at   | 383  | 1.1 | 3.4 | 4.7 | 427  | 1.1 | 1.4 | 4.3 | AT3G05200 | RING-H2 zinc finger protein ATL6 -related                              |
| 486 | 245840_at   | 54   | 1.2 | 2.3 | 4.6 | 65   | 0.8 | 1.1 | 4.3 | AT1G58420 | expressed protein                                                      |
| 487 | 255485_at   | 217  | 0.9 | 1.6 | 1.8 | 110  | 0.9 | 1.2 | 4.3 | AT4G02550 | expressed protein                                                      |
| 488 | 246082_at   | 120  | 1.2 | 1.5 | 1.7 | 72   | 0.8 | 1.4 | 4.3 | AT5G20480 | leucine-rich repeat transmembrane protein kinase, putative             |
| 489 | 267499_at   | 130  | 1.1 | 1.3 | 1.6 | 110  | 1.4 | 1.8 | 4.2 | AT2G45500 | hypothetical protein                                                   |
| 490 | 265041_at   | 188  | 0.8 | 1.1 | 1.0 | 123  | 1.0 | 1.8 | 4.2 | AT1G04070 | expressed protein                                                      |
| 491 | 247864_s_at | 689  | 1.1 | 1.8 | 2.0 | 719  | 1.1 | 1.4 | 4.2 | AT5G57890 | anthranilate synthase, beta subunit (ASB), putative                    |
| 492 | 265536_at   | 182  | 1.2 | 2.1 | 3.0 | 64   | 2.6 | 3.9 | 4.2 | AT2G15880 | leucine-rich repeat extensin family                                    |
| 493 | 246214_at   | 423  | 1.6 | 2.0 | 1.3 | 315  | 1.0 | 1.2 | 4.2 | AT4G36990 | heat shock transcription factor 4 (HSF4)                               |
| 494 | 253506_at   | 155  | 1.2 | 1.5 | 1.6 | 142  | 1.0 | 1.3 | 4.2 | AT4G31980 | expressed protein                                                      |
| 495 | 247044_at   | 190  | 1.2 | 2.1 | 2.4 | 233  | 1.0 | 1.2 | 4.2 | AT5G66850 | MAP protein kinase                                                     |
| 496 | 248381_at   | 340  | 1.4 | 1.5 | 1.0 | 290  | 0.9 | 1.1 | 4.2 | AT5G51830 | fructokinase, putative                                                 |
| 497 | 263216_s_at | 267  | 1.4 | 1.7 | 1.6 | 80   | 1.9 | 2.4 | 4.2 | AT1G30720 | FAD-linked oxidoreductase family                                       |
| 498 | 255733_at   | 120  | 1.4 | 5.1 | 7.7 | 193  | 0.9 | 0.8 | 4.2 | AT1G25400 | expressed protein                                                      |
| 499 | 249237_at   | 2072 | 1.5 | 2.8 | 2.7 | 1559 | 1.0 | 1.3 | 4.2 | AT5G42050 | expressed protein                                                      |
| 500 | 253268_s_at | 726  | 1.7 | 4.2 | 2.7 | 992  | 1.0 | 1.9 | 4.2 | AT4G34135 | glucosyltransferase -related protein                                   |
| 501 | 256050_at   | 272  | 1.5 | 2.6 | 2.7 | 176  | 1.0 | 1.0 | 4.2 | AT1G07000 | exocyst subunit EXO70 family                                           |
| 502 | 267537_at   | 268  | 1.0 | 2.0 | 2.3 | 221  | 1.1 | 1.5 | 4.2 | AT2G41880 | guanylate kinase -related                                              |
| 503 | 245711_at   | 217  | 1.3 | 3.4 | 4.5 | 145  | 1.3 | 1.6 | 4.2 | AT5G04340 | c2h2 zinc finger transcription factor -related                         |
| 504 | 264483_at   | 83   | 0.8 | 1.1 | 1.3 | 75   | 1.3 | 2.1 | 4.2 | AT1G77230 | tetratricopeptide repeat (TPR)-containing protein                      |

|            |             |      |      |      |      |      |     |     |     |           |                                                                                                                                                   |
|------------|-------------|------|------|------|------|------|-----|-----|-----|-----------|---------------------------------------------------------------------------------------------------------------------------------------------------|
| <b>505</b> | 249575_at   | 222  | 0.9  | 0.3  | 0.5  | 55   | 1.1 | 2.7 | 4.2 | AT5G37670 | heat shock protein family                                                                                                                         |
| <b>506</b> | 247602_at   | 46   | 2.2  | 3.4  | 1.9  | 72   | 0.9 | 1.1 | 4.2 | AT5G60900 | S-receptor kinase homolog 2 precursor                                                                                                             |
| <b>507</b> | 250829_at   | 469  | 1.1  | 3.4  | 3.1  | 447  | 1.0 | 1.4 | 4.2 | AT5G04720 | disease resistance protein (CC-NBS-LRR class), putative                                                                                           |
| <b>508</b> | 266555_at   | 326  | 2.0  | 1.9  | 1.5  | 95   | 1.1 | 1.4 | 4.2 | AT2G46270 | G-box binding bZIP transcription factor                                                                                                           |
| <b>509</b> | 248463_at   | 178  | 1.1  | 1.2  | 1.0  | 136  | 1.1 | 1.5 | 4.1 | AT5G51130 | expressed protein                                                                                                                                 |
| <b>510</b> | 249032_at   | 96   | 1.1  | 2.1  | 2.5  | 107  | 1.1 | 1.0 | 4.1 | AT5G44910 | disease resistance protein (TIR class), putative                                                                                                  |
| <b>511</b> | 245252_at   | 52   | 1.2  | 4.5  | 8.5  | 61   | 1.0 | 1.5 | 4.1 | AT4G17500 | ethylene responsive element binding factor 1 (frameshift !)                                                                                       |
| <b>512</b> | 266167_at   | 705  | 1.2  | 1.8  | 1.3  | 922  | 0.8 | 1.0 | 4.1 | AT2G38860 | (YLS5) proteaseI (pfpl)-like protein, complete cds                                                                                                |
| <b>513</b> | 261394_at   | 84   | 1.3  | 1.6  | 2.1  | 66   | 1.1 | 1.2 | 4.1 | AT1G79680 | WAK-like kinase (WLK)                                                                                                                             |
| <b>514</b> | 248086_at   | 37   | 1.6  | 1.8  | 1.8  | 78   | 0.5 | 1.5 | 4.1 | AT5G55490 | hypothetical protein                                                                                                                              |
| <b>515</b> | 249984_at   | 643  | 1.4  | 1.8  | 1.9  | 642  | 1.0 | 1.7 | 4.1 | AT5G18400 | expressed protein                                                                                                                                 |
| <b>516</b> | 265899_s_at | 174  | 1.0  | 1.2  | 0.9  | 166  | 0.8 | 1.3 | 4.1 | AT2G25700 | E3 ubiquitin ligase SCF complex subunit SKP1/ASK1 (At3), putative                                                                                 |
| <b>517</b> | 264339_at   | 131  | 1.2  | 2.1  | 4.7  | 59   | 1.2 | 2.2 | 4.1 | AT1G70290 | alpha,alpha-trehalose-phosphate synthase, UDP-forming (trehalose-6-phosphate synthase/UDP-glucose-glucosephosphate glucosyltransferase), putative |
| <b>518</b> | 264726_at   | 91   | 1.4  | 2.5  | 2.1  | 127  | 1.1 | 1.1 | 4.0 | AT1G22985 | AP2 domain transcription factor, putative                                                                                                         |
| <b>519</b> | 260023_at   | 83   | 10.6 | 28.2 | 15.1 | 102  | 1.5 | 1.5 | 4.0 | AT1G30040 | gibberellin 2-oxidase (GA2-oxidase) (ga2ox2)                                                                                                      |
| <b>520</b> | 262177_at   | 176  | 1.3  | 1.4  | 1.5  | 158  | 1.1 | 1.3 | 4.0 | AT1G74710 | isochorismate synthase 1 (isochorismate mutase) (ICS1)                                                                                            |
| <b>521</b> | 254917_at   | 80   | 1.9  | 2.8  | 2.0  | 44   | 1.3 | 1.3 | 4.0 | AT4G11350 | fringe-related protein                                                                                                                            |
| <b>522</b> | 250062_at   | 482  | 1.2  | 1.3  | 0.9  | 452  | 0.9 | 1.5 | 4.0 | AT5G17760 | BCS1 - like protein                                                                                                                               |
| <b>523</b> | 266097_at   | 2746 | 2.3  | 2.4  | 2.2  | 1190 | 1.3 | 1.8 | 4.0 | AT2G37970 | expressed protein                                                                                                                                 |
| <b>524</b> | 259792_at   | 301  | 1.4  | 3.2  | 3.4  | 208  | 1.0 | 1.0 | 4.0 | AT1G29690 | expressed protein                                                                                                                                 |
| <b>525</b> | 258316_at   | 284  | 1.1  | 0.9  | 0.7  | 269  | 0.8 | 1.7 | 4.0 | AT3G22660 | expressed protein                                                                                                                                 |
| <b>526</b> | 265190_at   | 635  | 1.1  | 1.3  | 1.0  | 480  | 1.1 | 1.8 | 4.0 | AT1G23780 | F-box protein family                                                                                                                              |
| <b>527</b> | 246401_at   | 116  | 1.2  | 1.2  | 1.0  | 120  | 1.0 | 0.9 | 4.0 | AT1G57560 | myb family transcription factor                                                                                                                   |
| <b>528</b> | 251039_at   | 95   | 1.1  | 2.3  | 3.8  | 87   | 1.0 | 1.1 | 4.0 | AT5G02020 | expressed protein                                                                                                                                 |
| <b>529</b> | 255319_at   | 95   | 1.5  | 2.2  | 1.8  | 121  | 0.8 | 1.2 | 4.0 | AT4G04220 | disease resistance protein family                                                                                                                 |
| <b>530</b> | 247676_at   | 150  | 1.1  | 1.2  | 1.0  | 104  | 0.9 | 1.8 | 4.0 | AT5G59980 | expressed protein                                                                                                                                 |
| <b>531</b> | 256762_at   | 89   | 2.3  | 4.2  | 1.9  | 76   | 1.1 | 1.3 | 3.9 | AT3G25655 | expressed protein                                                                                                                                 |
| <b>532</b> | 255504_at   | 586  | 1.2  | 4.0  | 4.5  | 334  | 1.0 | 1.4 | 3.9 | AT4G02200 | drought-induced protein -related                                                                                                                  |
| <b>533</b> | 264223_s_at | 37   | 1.2  | 2.9  | 3.1  | 72   | 0.6 | 0.9 | 3.9 | AT1G67520 | receptor kinase -related                                                                                                                          |
| <b>534</b> | 255713_s_at | 260  | 1.0  | 1.0  | 0.7  | 202  | 1.2 | 1.6 | 3.9 | AT4G00234 | hypothetical protein                                                                                                                              |
| <b>535</b> | 260919_at   | 197  | 1.1  | 0.9  | 1.5  | 127  | 0.8 | 1.6 | 3.9 | AT1G21520 | expressed protein                                                                                                                                 |
| <b>536</b> | 254571_at   | 80   | 0.9  | 1.2  | 1.5  | 46   | 1.2 | 0.5 | 3.9 | AT4G19370 | hypothetical protein                                                                                                                              |
| <b>537</b> | 254120_at   | 168  | 1.3  | 9.6  | 18.3 | 126  | 0.8 | 0.9 | 3.9 | AT4G24570 | mitochondrial carrier protein family                                                                                                              |
| <b>538</b> | 249889_at   | 102  | 1.8  | 1.7  | 2.2  | 123  | 1.4 | 0.9 | 3.9 | AT5G22540 | hypothetical protein                                                                                                                              |
| <b>539</b> | 258678_at   | 585  | 0.8  | 1.1  | 1.3  | 564  | 0.9 | 1.7 | 3.9 | AT3G08690 | ubiquitin-conjugating enzyme 11 (UBC11)                                                                                                           |

|     |             |      |     |     |      |      |     |     |     |           |                                                                        |
|-----|-------------|------|-----|-----|------|------|-----|-----|-----|-----------|------------------------------------------------------------------------|
| 540 | 266658_at   | 109  | 1.1 | 5.0 | 11.8 | 162  | 0.9 | 1.1 | 3.9 | AT2G25735 | expressed protein                                                      |
| 541 | 260203_at   | 40   | 1.3 | 4.6 | 4.3  | 50   | 1.3 | 1.1 | 3.9 | AT1G52890 | No apical meristem (NAM) protein family                                |
| 542 | 254707_at   | 447  | 1.6 | 1.7 | 1.1  | 129  | 1.3 | 1.8 | 3.9 | AT4G18010 | inositol polyphosphate 5-phosphatase II (IP5PII)                       |
| 543 | 267189_at   | 389  | 1.2 | 1.4 | 1.3  | 346  | 1.3 | 1.7 | 3.9 | AT2G44180 | methionine aminopeptidase -related                                     |
| 544 | 258993_at   | 4191 | 1.4 | 1.2 | 2.0  | 408  | 1.7 | 1.9 | 3.9 | AT3G08940 | chlorophyll a/b-binding protein -related                               |
| 545 | 255074_at   | 39   | 1.1 | 2.1 | 1.8  | 57   | 1.0 | 0.9 | 3.9 | AT4G09100 | C3HC4-type zinc finger protein family                                  |
| 546 | 250971_at   | 2196 | 1.1 | 0.8 | 0.9  | 220  | 1.2 | 2.0 | 3.9 | AT5G02810 | pseudo-response regulator, APRR7 (APRR1/TOC1 family)                   |
| 547 | 256756_at   | 86   | 2.8 | 5.5 | 3.5  | 83   | 1.2 | 0.8 | 3.9 | AT3G25610 | haloacid dehalogenase-like hydrolase family                            |
| 548 | 265259_at   | 510  | 1.0 | 1.1 | 1.0  | 411  | 1.1 | 2.0 | 3.9 | AT2G20330 | transducin / WD-40 repeat protein family                               |
| 549 | 247921_at   | 1962 | 1.1 | 1.0 | 1.0  | 353  | 1.0 | 1.4 | 3.9 | AT5G57660 | CONSTANS B-box zinc finger family protein                              |
| 550 | 258262_at   | 162  | 1.2 | 2.8 | 4.1  | 101  | 1.2 | 1.4 | 3.8 | AT3G15770 | expressed protein                                                      |
| 551 | 246858_at   | 242  | 1.9 | 3.7 | 2.7  | 175  | 1.1 | 0.7 | 3.8 | AT5G25930 | receptor-related protein kinase - like                                 |
| 552 | 248205_at   | 66   | 2.9 | 2.8 | 2.0  | 47   | 0.7 | 1.2 | 3.8 | AT5G54300 | cotton fiber expressed protein 1-related protein                       |
| 553 | 256583_at   | 153  | 1.3 | 3.0 | 3.0  | 165  | 0.8 | 1.0 | 3.8 | AT3G28850 | expressed protein                                                      |
| 554 | 250290_at   | 213  | 1.3 | 1.2 | 1.0  | 173  | 0.9 | 1.5 | 3.8 | AT5G13310 | expressed protein                                                      |
| 555 | 258975_at   | 156  | 1.1 | 1.4 | 1.8  | 105  | 0.8 | 0.9 | 3.8 | AT3G01970 | WRKY family transcription factor                                       |
| 556 | 259911_at   | 379  | 1.1 | 1.0 | 1.0  | 264  | 1.2 | 1.8 | 3.8 | AT1G72680 | cinnamyl-alcohol dehydrogenase (CAD), putative                         |
| 557 | 264767_at   | 335  | 1.1 | 1.4 | 1.6  | 168  | 1.0 | 1.1 | 3.8 | AT1G61380 | S-locus protein kinase, putative                                       |
| 558 | 254409_at   | 175  | 0.6 | 1.6 | 1.9  | 132  | 1.2 | 0.9 | 3.8 | AT4G21400 | serine threonine protein kinase - like protein                         |
| 559 | 256230_at   | 130  | 1.2 | 1.0 | 1.2  | 121  | 0.9 | 2.0 | 3.8 | AT3G12340 | immunophilin / FKBP-type peptidyl-prolyl cis-trans isomerase, putative |
| 560 | 260345_at   | 211  | 1.0 | 2.1 | 2.2  | 203  | 1.1 | 1.1 | 3.8 | AT1G69270 | receptor protein kinase -related                                       |
| 561 | 267372_at   | 114  | 1.1 | 1.8 | 0.4  | 111  | 1.5 | 1.4 | 3.8 | AT2G26290 | protein kinase, putative                                               |
| 562 | 246744_at   | 1425 | 1.3 | 2.2 | 2.4  | 1688 | 1.0 | 1.9 | 3.8 | AT5G27760 | expressed protein                                                      |
| 563 | 266993_at   | 843  | 1.5 | 1.3 | 1.1  | 546  | 0.8 | 1.0 | 3.8 | AT2G39210 | nodulin-related protein                                                |
| 564 | 249806_at   | 146  | 1.2 | 0.9 | 0.9  | 113  | 0.9 | 1.2 | 3.8 | AT5G23850 | expressed protein                                                      |
| 565 | 263162_at   | 405  | 1.1 | 1.1 | 1.0  | 293  | 1.1 | 1.6 | 3.8 | AT1G54150 | C3HC4-type zinc finger protein family                                  |
| 566 | 247855_at   | 111  | 1.3 | 1.8 | 1.6  | 128  | 1.0 | 1.9 | 3.8 | AT5G58210 | proline-rich protein family                                            |
| 567 | 267384_at   | 147  | 3.0 | 3.3 | 2.7  | 139  | 0.6 | 1.1 | 3.8 | AT2G44370 | CHP-rich zinc finger protein, putative                                 |
| 568 | 248049_at   | 484  | 2.0 | 1.8 | 1.0  | 298  | 1.4 | 2.7 | 3.7 | AT5G56090 | expressed protein                                                      |
| 569 | 252422_at   | 398  | 1.3 | 2.0 | 1.9  | 423  | 1.0 | 1.2 | 3.7 | AT3G47550 | expressed protein                                                      |
| 570 | 261526_at   | 179  | 1.3 | 3.8 | 4.6  | 195  | 1.0 | 1.0 | 3.7 | AT1G14370 | protein kinase (APK2a)                                                 |
| 571 | 245365_at   | 635  | 1.1 | 1.3 | 1.2  | 453  | 0.9 | 1.3 | 3.7 | AT4G17720 | RRM-containing protein                                                 |
| 572 | 256922_at   | 929  | 1.3 | 2.0 | 2.2  | 822  | 1.2 | 0.9 | 3.7 | AT3G19010 | flavonol synthase family                                               |
| 573 | 265461_at   | 611  | 1.2 | 1.6 | 1.8  | 509  | 1.2 | 1.5 | 3.7 | AT2G46500 | ubiquitin family                                                       |
| 574 | 260415_at   | 68   | 1.3 | 1.8 | 2.0  | 50   | 1.3 | 1.3 | 3.7 | AT1G69790 | protein kinase -related                                                |
| 575 | 249319_s_at | 82   | 1.0 | 1.8 | 1.4  | 95   | 1.1 | 1.3 | 3.7 | AT5G40880 | zfw3 protein                                                           |
| 576 | 250914_at   | 76   | 1.0 | 1.0 | 1.1  | 60   | 0.8 | 2.6 | 3.7 | AT5G03780 | myb -related protein                                                   |



|     |           |      |     |      |      |      |     |     |     |           |                                                            |
|-----|-----------|------|-----|------|------|------|-----|-----|-----|-----------|------------------------------------------------------------|
| 577 | 257022_at | 159  | 1.5 | 4.0  | 4.2  | 174  | 0.8 | 0.8 | 3.7 | AT3G19580 | zinc finger protein -related                               |
| 578 | 259109_at | 271  | 1.1 | 2.1  | 2.3  | 180  | 1.5 | 1.4 | 3.7 | AT3G05580 | serine/threonine protein phosphatase (PP1)                 |
| 579 | 254318_at | 183  | 2.3 | 2.8  | 1.6  | 123  | 1.1 | 1.2 | 3.7 | AT4G22530 | expressed protein                                          |
| 580 | 257805_at | 1228 | 0.9 | 1.3  | 1.4  | 1054 | 1.0 | 1.4 | 3.7 | AT3G18830 | mannitol transporter, putative                             |
| 581 | 249677_at | 3981 | 3.6 | 2.3  | 1.4  | 545  | 1.0 | 1.9 | 3.7 | AT5G35970 | DNA helicase-related                                       |
| 582 | 254922_at | 73   | 1.2 | 2.7  | 4.3  | 115  | 1.1 | 0.8 | 3.7 | AT4G11370 | RING-H2 finger protein, putative                           |
| 583 | 250994_at | 476  | 1.1 | 0.8  | 0.8  | 752  | 0.9 | 1.5 | 3.7 | AT5G02490 | heat shock protein hsc70-2 (hsc70.2) (hsp70-2)             |
| 584 | 258813_at | 217  | 1.4 | 1.3  | 1.1  | 147  | 1.3 | 1.4 | 3.7 | AT3G04060 | NAM-related protein (no apical meristem)                   |
| 585 | 245560_at | 282  | 6.1 | 5.1  | 1.7  | 53   | 1.9 | 2.7 | 3.7 | AT4G15480 | UDP-glycosyltransferase family                             |
| 586 | 259560_at | 254  | 1.3 | 1.1  | 0.9  | 222  | 0.9 | 1.0 | 3.7 | AT1G21270 | wall-associated kinase 2                                   |
| 587 | 265197_at | 125  | 6.1 | 7.9  | 4.5  | 113  | 1.3 | 2.5 | 3.7 | AT2G36750 | UDP-glycosyltransferase family                             |
| 588 | 247543_at | 101  | 1.5 | 12.7 | 15.0 | 79   | 1.1 | 2.2 | 3.7 | AT5G61600 | AP2 domain transcription factor, putative                  |
| 589 | 253124_at | 92   | 1.4 | 1.9  | 1.9  | 98   | 1.1 | 0.9 | 3.7 | AT4G36030 | armadillo repeat containing protein                        |
| 590 | 253125_at | 1012 | 1.3 | 1.0  | 1.1  | 410  | 0.9 | 1.4 | 3.7 | AT4G36040 | DnaJ protein family                                        |
| 591 | 253987_at | 152  | 0.8 | 0.8  | 1.1  | 196  | 1.1 | 1.2 | 3.7 | AT4G26270 | pyrophosphate-dependent phosphofructo-1-kinase             |
| 592 | 263584_at | 115  | 1.0 | 4.5  | 5.0  | 125  | 1.0 | 0.9 | 3.6 | AT2G17040 | No apical meristem (NAM) protein family                    |
| 593 | 250676_at | 1505 | 1.2 | 4.1  | 5.9  | 1541 | 1.0 | 0.9 | 3.6 | AT5G06320 | harpin-induced protein 1 family (NDR1/HIN1-like protein 3) |
| 594 | 267546_at | 55   | 1.3 | 1.8  | 1.6  | 50   | 1.0 | 0.9 | 3.6 | AT2G32680 | disease resistance protein family                          |
| 595 | 253377_at | 690  | 1.6 | 3.4  | 2.8  | 562  | 1.1 | 1.3 | 3.6 | AT4G33300 | disease resistance protein (CC-NBS-LRR class), putative    |
| 596 | 266536_at | 435  | 1.3 | 2.1  | 1.8  | 414  | 0.9 | 0.9 | 3.6 | AT2G16900 | expressed protein                                          |
| 597 | 252117_at | 341  | 1.1 | 2.0  | 1.8  | 301  | 1.1 | 1.8 | 3.6 | AT3G51430 | strictosidine synthase-related                             |
| 598 | 246250_at | 83   | 1.1 | 1.4  | 1.1  | 119  | 0.9 | 1.4 | 3.6 | AT4G36880 | cysteine proteinase                                        |
| 599 | 260303_at | 254  | 1.3 | 1.9  | 1.8  | 289  | 0.9 | 1.0 | 3.6 | AT1G70520 | protein kinase -related                                    |
| 600 | 248875_at | 94   | 1.6 | 4.2  | 2.6  | 84   | 1.3 | 1.6 | 3.6 | AT5G46470 | disease resistance protein (TIR-NBS-LRR class), putative   |
| 601 | 267165_at | 1034 | 1.1 | 1.1  | 0.8  | 727  | 1.0 | 0.9 | 3.6 | AT2G37710 | receptor lectin kinase, putative                           |
| 602 | 253453_at | 835  | 1.3 | 1.6  | 1.1  | 491  | 0.9 | 1.2 | 3.6 | AT4G31860 | protein phosphatase 2C (PP2C), putative                    |
| 603 | 267036_at | 361  | 1.2 | 1.9  | 2.4  | 293  | 1.3 | 1.4 | 3.6 | AT2G38465 | expressed protein                                          |
| 604 | 249233_at | 756  | 1.4 | 1.4  | 1.1  | 598  | 1.0 | 2.2 | 3.6 | AT5G42150 | expressed protein                                          |
| 605 | 259704_at | 298  | 1.1 | 0.9  | 0.4  | 292  | 1.0 | 1.7 | 3.6 | AT1G77680 | 3'-5' exoribonuclease -related                             |
| 606 | 265662_at | 1396 | 1.3 | 1.5  | 0.9  | 1085 | 0.9 | 1.8 | 3.6 | AT2G24500 | C2H2-type zinc finger protein -related                     |
| 607 | 263379_at | 418  | 1.2 | 7.2  | 7.0  | 436  | 1.2 | 1.3 | 3.6 | AT2G40140 | CCCH-type zinc finger protein -related                     |
| 608 | 250951_at | 16   | 5.1 | 7.6  | 8.6  | 26   | 1.1 | 1.0 | 3.6 | AT5G03550 | hypothetical protein                                       |
| 609 | 248870_at | 251  | 1.3 | 6.2  | 4.6  | 285  | 1.1 | 1.6 | 3.6 | AT5G46710 | expressed protein                                          |
| 610 | 266532_at | 211  | 1.5 | 2.1  | 0.9  | 146  | 1.4 | 2.4 | 3.6 | AT2G16890 | glycosyltransferase family                                 |
| 611 | 253659_at | 200  | 1.1 | 1.0  | 0.8  | 229  | 0.7 | 1.8 | 3.6 | AT4G30150 | expressed protein                                          |
| 612 | 264756_at | 316  | 1.5 | 1.9  | 2.0  | 295  | 1.3 | 1.3 | 3.6 | AT1G61370 | receptor protein kinase (IRK1) -related                    |
| 613 | 245126_at | 825  | 2.0 | 1.4  | 0.7  | 136  | 1.9 | 2.5 | 3.6 | AT2G47460 | myb family transcription factor                            |

|            |             |      |     |      |      |      |     |     |     |           |                                                                          |
|------------|-------------|------|-----|------|------|------|-----|-----|-----|-----------|--------------------------------------------------------------------------|
| <b>614</b> | 246682_at   | 240  | 0.8 | 1.1  | 0.8  | 285  | 1.0 | 1.2 | 3.6 | AT5G33290 | Exostosin family                                                         |
| <b>615</b> | 261470_at   | 163  | 1.1 | 4.8  | 11.0 | 131  | 1.1 | 1.1 | 3.6 | AT1G28370 | ethylene responsive element binding factor 11, putative (EREBP11)(ERF11) |
| <b>616</b> | 260932_s_at | 94   | 2.0 | 2.3  | 1.6  | 123  | 0.7 | 1.2 | 3.6 | AT1G02530 | multidrug resistance P-glycoprotein, putative                            |
| <b>617</b> | 255872_at   | 196  | 1.3 | 1.6  | 1.5  | 166  | 1.5 | 1.3 | 3.6 | AT2G30360 | CBL-interacting protein kinase 11                                        |
| <b>618</b> | 267375_at   | 299  | 1.0 | 1.6  | 1.8  | 322  | 1.2 | 1.2 | 3.6 | AT2G26300 | G protein alpha subunit 1 (GPA1)                                         |
| <b>619</b> | 247280_at   | 3479 | 1.3 | 1.2  | 1.1  | 1993 | 1.1 | 1.2 | 3.6 | AT5G64260 | phi-1-related protein                                                    |
| <b>620</b> | 245854_at   | 790  | 1.1 | 1.7  | 2.0  | 1445 | 1.0 | 1.8 | 3.5 | AT5G13490 | mitochondrial ADP,ATP carrier protein 2                                  |
| <b>621</b> | 267142_at   | 424  | 1.2 | 2.1  | 1.9  | 485  | 0.9 | 1.5 | 3.5 | AT2G38290 | ammonium transporter -related                                            |
| <b>622</b> | 261506_at   | 547  | 1.1 | 1.4  | 1.4  | 430  | 1.1 | 1.0 | 3.5 | AT1G71697 | choline kinase -related                                                  |
| <b>623</b> | 266141_at   | 92   | 1.1 | 0.9  | 1.4  | 150  | 1.2 | 1.8 | 3.5 | AT2G02120 | plant defensin protein, putative (PDF2.1)                                |
| <b>624</b> | 264757_at   | 397  | 1.2 | 1.6  | 1.2  | 371  | 0.9 | 0.8 | 3.5 | AT1G61360 | S-locus protein kinase family                                            |
| <b>625</b> | 264906_at   | 168  | 2.6 | 3.7  | 2.3  | 177  | 0.8 | 1.3 | 3.5 | AT2G17270 | mitochondrial carrier protein family                                     |
| <b>626</b> | 248326_at   | 564  | 1.1 | 1.2  | 0.9  | 514  | 1.0 | 2.1 | 3.5 | AT5G52820 | Notchless protein homolog                                                |
| <b>627</b> | 264663_at   | 1760 | 1.4 | 2.0  | 1.4  | 1390 | 1.0 | 1.4 | 3.5 | AT1G09970 | leucine-rich repeat transmembrane protein kinase, putative               |
| <b>628</b> | 251745_at   | 169  | 1.5 | 15.3 | 15.3 | 186  | 1.0 | 0.8 | 3.5 | AT3G55980 | expressed protein                                                        |
| <b>629</b> | 263228_at   | 133  | 1.0 | 1.7  | 1.6  | 170  | 1.1 | 1.3 | 3.5 | AT1G30700 | FAD-linked oxidoreductase family                                         |
| <b>630</b> | 256518_at   | 96   | 1.4 | 1.0  | 1.0  | 61   | 1.5 | 2.1 | 3.5 | AT1G66080 | expressed protein                                                        |
| <b>631</b> | 266150_s_at | 195  | 1.1 | 0.5  | 0.4  | 135  | 1.1 | 1.6 | 3.5 | AT2G12290 | hypothetical protein                                                     |
| <b>632</b> | 254321_at   | 376  | 1.5 | 2.7  | 2.4  | 474  | 1.0 | 1.1 | 3.5 | AT4G22590 | trehalose-6-phosphate phosphatase, putative                              |
| <b>633</b> | 256627_at   | 316  | 1.0 | 1.4  | 2.0  | 287  | 0.8 | 0.9 | 3.5 | AT3G19970 | expressed protein                                                        |
| <b>634</b> | 265154_at   | 160  | 1.6 | 1.1  | 1.1  | 162  | 0.7 | 2.2 | 3.5 | AT1G30960 | GTP-binding protein, ERG -related                                        |
| <b>635</b> | 251904_at   | 438  | 1.1 | 1.4  | 1.1  | 280  | 1.2 | 1.6 | 3.5 | AT3G54130 | Machado-Joseph disease MJD1a -related protein                            |
| <b>636</b> | 262459_at   | 129  | 1.0 | 1.4  | 1.3  | 144  | 0.8 | 1.5 | 3.5 | AT1G50400 | hypothetical protein                                                     |
| <b>637</b> | 251776_at   | 2431 | 1.1 | 1.4  | 1.4  | 2391 | 0.9 | 1.6 | 3.5 | AT3G55620 | eukaryotic translation initiation factor 6 (EIF-6) - like protein        |
| <b>638</b> | 250054_at   | 510  | 0.6 | 1.0  | 1.0  | 530  | 1.2 | 1.5 | 3.5 | AT5G17860 | cation exchanger, putative (CAX7)                                        |
| <b>639</b> | 258996_at   | 214  | 1.2 | 1.3  | 1.7  | 256  | 1.1 | 2.2 | 3.5 | AT3G01800 | ribosome recycling factor -related                                       |
| <b>640</b> | 246461_at   | 105  | 1.2 | 1.2  | 1.0  | 174  | 0.9 | 1.9 | 3.5 | AT5G16930 | expressed protein                                                        |
| <b>641</b> | 251163_at   | 1345 | 1.0 | 1.4  | 1.2  | 917  | 1.0 | 1.5 | 3.5 | AT3G63310 | hypothetical protein                                                     |
| <b>642</b> | 264645_at   | 247  | 1.1 | 2.1  | 2.1  | 222  | 1.1 | 1.0 | 3.5 | AT1G08940 | expressed protein                                                        |
| <b>643</b> | 247740_at   | 121  | 0.8 | 1.3  | 1.3  | 84   | 1.4 | 1.2 | 3.5 | AT5G58940 | protein kinase family                                                    |
| <b>644</b> | 263776_s_at | 218  | 1.5 | 1.6  | 1.7  | 202  | 0.8 | 1.0 | 3.5 | AT2G46440 | cyclic nucleotide-regulated ion channel, putative (CNGC11)               |
| <b>645</b> | 246302_at   | 230  | 0.9 | 1.5  | 1.6  | 828  | 1.1 | 2.0 | 3.5 | AT3G51860 | cation exchanger, putative (CAX3)                                        |
| <b>646</b> | 258046_at   | 602  | 1.2 | 1.7  | 1.4  | 324  | 1.1 | 1.6 | 3.5 | AT3G21220 | mitogen-activated protein kinase kinase (MAPKK), putative (MKK5)         |
| <b>647</b> | 267624_at   | 648  | 1.2 | 2.1  | 2.2  | 572  | 1.0 | 1.2 | 3.4 | AT2G39660 | protein kinase, putative                                                 |
| <b>648</b> | 258812_at   | 760  | 1.1 | 0.9  | 0.9  | 603  | 1.0 | 1.9 | 3.4 | AT3G03950 | expressed protein                                                        |
| <b>649</b> | 259340_at   | 47   | 1.6 | 4.3  | 3.9  | 99   | 0.5 | 0.9 | 3.4 | AT3G03870 | expressed protein                                                        |

|            |           |      |     |     |      |      |     |     |     |           |                                                                                                    |
|------------|-----------|------|-----|-----|------|------|-----|-----|-----|-----------|----------------------------------------------------------------------------------------------------|
| <b>650</b> | 261551_at | 108  | 1.2 | 1.9 | 1.4  | 131  | 0.9 | 1.3 | 3.4 | AT1G63440 | copper-exporting ATPase (responsive-to-antagonist 1) (copper-transporting ATPase) (RAN1), putative |
| <b>651</b> | 259178_at | 407  | 1.0 | 1.1 | 0.9  | 351  | 0.8 | 1.0 | 3.4 | AT3G01650 | copine-related                                                                                     |
| <b>652</b> | 254408_at | 74   | 1.3 | 5.2 | 5.3  | 110  | 1.3 | 0.8 | 3.4 | AT4G21390 | serine/threonine kinase - like protein                                                             |
| <b>653</b> | 254287_at | 79   | 0.9 | 1.0 | 1.2  | 126  | 1.0 | 1.7 | 3.4 | AT4G22960 | hypothetical protein                                                                               |
| <b>654</b> | 253997_at | 110  | 1.5 | 2.4 | 2.6  | 88   | 0.9 | 1.0 | 3.4 | AT4G26090 | disease resistance protein RPS2 (CC-NBS-LRR class), putative                                       |
| <b>655</b> | 260915_at | 110  | 1.6 | 2.8 | 3.2  | 69   | 1.5 | 1.1 | 3.4 | AT1G02660 | lipase (class 3) family                                                                            |
| <b>656</b> | 263478_at | 1018 | 1.3 | 2.5 | 2.5  | 917  | 1.0 | 1.0 | 3.4 | AT2G31880 | leucine-rich repeat transmembrane protein kinase, putative                                         |
| <b>657</b> | 255382_at | 776  | 1.2 | 1.5 | 1.1  | 671  | 0.9 | 1.6 | 3.4 | AT4G03430 | pre-mRNA splicing factor -related                                                                  |
| <b>658</b> | 264102_at | 1582 | 2.0 | 1.7 | 0.8  | 423  | 1.4 | 2.1 | 3.4 | AT1G79270 | expressed protein                                                                                  |
| <b>659</b> | 250575_at | 218  | 1.2 | 2.7 | 3.5  | 188  | 1.0 | 0.9 | 3.4 | AT5G08240 | expressed protein                                                                                  |
| <b>660</b> | 266719_at | 351  | 0.9 | 1.1 | 1.1  | 47   | 1.7 | 2.8 | 3.4 | AT2G46830 | MYB-related transcription factor (CCA1)                                                            |
| <b>661</b> | 251248_at | 441  | 1.1 | 1.5 | 1.1  | 126  | 0.5 | 1.1 | 3.4 | AT3G62150 | multidrug resistance P-glycoprotein, putative                                                      |
| <b>662</b> | 256969_at | 195  | 1.3 | 2.0 | 2.8  | 149  | 1.2 | 1.7 | 3.4 | AT3G21080 | expressed protein                                                                                  |
| <b>663</b> | 248794_at | 48   | 1.5 | 5.0 | 12.4 | 62   | 0.6 | 1.0 | 3.4 | AT5G47220 | ethylene responsive element binding factor 2 (EREBP-2)                                             |
| <b>664</b> | 257536_at | 59   | 1.2 | 2.9 | 7.5  | 70   | 0.7 | 1.2 | 3.4 | AT3G02800 | expressed protein                                                                                  |
| <b>665</b> | 261585_at | 158  | 1.1 | 1.0 | 0.9  | 79   | 1.2 | 1.4 | 3.4 | AT1G01010 | No apical meristem (NAM) protein family                                                            |
| <b>666</b> | 253839_at | 84   | 1.5 | 1.9 | 2.3  | 105  | 1.2 | 1.6 | 3.4 | AT4G27890 | expressed protein                                                                                  |
| <b>667</b> | 265061_at | 138  | 1.3 | 1.4 | 1.3  | 157  | 1.0 | 1.4 | 3.4 | AT1G61640 | expressed protein                                                                                  |
| <b>668</b> | 264655_at | 2051 | 1.7 | 3.1 | 3.8  | 1567 | 1.1 | 1.2 | 3.4 | AT1G09070 | C2 domain-containing protein                                                                       |
| <b>669</b> | 265147_at | 99   | 1.3 | 1.1 | 1.4  | 157  | 0.9 | 2.3 | 3.4 | AT1G51380 | eukaryotic translation initiation factor 4A (eIF-4A), putative                                     |
| <b>670</b> | 249459_at | 149  | 1.9 | 2.3 | 1.8  | 108  | 0.7 | 0.8 | 3.4 | AT5G39580 | peroxidase, putative                                                                               |
| <b>671</b> | 256998_at | 164  | 1.3 | 1.0 | 0.9  | 148  | 1.5 | 1.3 | 3.4 | AT3G14180 | expressed protein                                                                                  |
| <b>672</b> | 254255_at | 173  | 1.4 | 2.0 | 2.0  | 152  | 0.8 | 0.9 | 3.3 | AT4G23220 | serine/threonine kinase - like protein                                                             |
| <b>673</b> | 266934_at | 257  | 1.1 | 1.3 | 1.1  | 350  | 0.6 | 1.8 | 3.3 | AT2G18900 | transducin / WD-40 repeat protein family                                                           |
| <b>674</b> | 264150_at | 569  | 0.9 | 0.9 | 0.8  | 415  | 0.9 | 1.6 | 3.3 | AT1G02090 | COP9 complex subunit, FUS5                                                                         |
| <b>675</b> | 267102_at | 506  | 1.3 | 1.3 | 1.1  | 446  | 0.9 | 1.4 | 3.3 | AT2G41500 | WD-40 repeat protein family / small nuclear ribonucleoprotein Prp4p-related                        |
| <b>676</b> | 264867_at | 84   | 1.2 | 2.9 | 2.7  | 105  | 1.2 | 0.8 | 3.3 | AT1G24150 | formin homology 2 (FH2) domain-containing protein                                                  |
| <b>677</b> | 265926_at | 94   | 0.9 | 1.3 | 1.2  | 111  | 1.3 | 1.9 | 3.3 | AT2G18600 | RUB1-conjugating enzyme, putative                                                                  |
| <b>678</b> | 253637_at | 300  | 0.9 | 0.9 | 1.1  | 243  | 1.0 | 1.4 | 3.3 | AT4G30390 | expressed protein                                                                                  |
| <b>679</b> | 248698_at | 1205 | 1.3 | 1.6 | 1.6  | 1029 | 1.0 | 1.2 | 3.3 | AT5G48380 | leucine rich repeat protein family                                                                 |
| <b>680</b> | 265460_at | 2742 | 0.8 | 3.6 | 3.5  | 2570 | 1.1 | 1.6 | 3.3 | AT2G46600 | calcium-binding protein, putative                                                                  |
| <b>681</b> | 253559_at | 315  | 1.0 | 1.2 | 0.8  | 227  | 1.1 | 1.7 | 3.3 | AT4G31140 | glycosyl hydrolase family 17                                                                       |
| <b>682</b> | 245686_at | 1671 | 1.2 | 1.4 | 1.1  | 1478 | 1.0 | 1.3 | 3.3 | AT5G22060 | DnaJ protein, putative                                                                             |
| <b>683</b> | 261193_at | 756  | 0.9 | 5.7 | 9.8  | 807  | 1.1 | 1.4 | 3.3 | AT1G32920 | expressed protein                                                                                  |
| <b>684</b> | 257487_at | 184  | 1.3 | 1.6 | 1.3  | 155  | 1.0 | 2.2 | 3.3 | AT1G71850 | hypothetical protein                                                                               |

|            |           |      |     |     |     |      |     |     |     |           |                                                                                           |
|------------|-----------|------|-----|-----|-----|------|-----|-----|-----|-----------|-------------------------------------------------------------------------------------------|
| <b>685</b> | 251847_at | 865  | 1.3 | 1.2 | 1.4 | 1074 | 1.0 | 1.7 | 3.3 | AT3G54640 | tryptophan synthase, alpha subunit (TSA1)                                                 |
| <b>686</b> | 247491_at | 283  | 1.0 | 1.0 | 0.8 | 253  | 0.8 | 1.5 | 3.3 | AT5G61880 | auxin-regulated protein                                                                   |
| <b>687</b> | 267066_at | 445  | 2.9 | 2.4 | 1.4 | 190  | 1.3 | 2.5 | 3.3 | AT2G41040 | expressed protein                                                                         |
| <b>688</b> | 254459_at | 283  | 3.6 | 2.3 | 1.2 | 62   | 1.0 | 0.7 | 3.3 | AT4G21200 | gibberellin 20-oxidase family                                                             |
| <b>689</b> | 259213_at | 83   | 1.6 | 2.2 | 2.9 | 128  | 0.8 | 0.8 | 3.3 | AT3G09010 | protein kinase family                                                                     |
| <b>690</b> | 255283_at | 457  | 0.9 | 1.0 | 1.0 | 397  | 1.0 | 1.5 | 3.3 | AT4G04620 | symbiosis-related protein -related                                                        |
| <b>691</b> | 260211_at | 198  | 1.5 | 2.4 | 3.5 | 158  | 1.0 | 1.2 | 3.3 | AT1G74440 | expressed protein                                                                         |
| <b>692</b> | 266231_at | 227  | 1.0 | 1.6 | 1.7 | 163  | 1.2 | 0.9 | 3.3 | AT2G02220 | leucine-rich repeat transmembrane protein kinase, putative                                |
| <b>693</b> | 248487_at | 1010 | 1.0 | 1.1 | 1.3 | 704  | 1.1 | 1.6 | 3.3 | AT5G51070 | ATP-dependent Clp protease ATP-binding subunit (ClpD), ERD1 protein precursor             |
| <b>694</b> | 245193_at | 250  | 1.8 | 3.0 | 3.0 | 249  | 1.0 | 1.4 | 3.3 | AT1G67810 | F12A21.6                                                                                  |
| <b>695</b> | 254238_at | 214  | 1.2 | 0.9 | 0.9 | 200  | 1.3 | 1.6 | 3.3 | AT4G23540 | expressed protein                                                                         |
| <b>696</b> | 260603_at | 377  | 1.4 | 1.6 | 3.1 | 151  | 1.3 | 1.9 | 3.3 | AT1G55960 | membrane related protein CP5 -related                                                     |
| <b>697</b> | 258188_at | 4694 | 2.9 | 2.0 | 1.4 | 997  | 1.1 | 1.7 | 3.3 | AT3G17800 | expressed protein                                                                         |
| <b>698</b> | 261168_at | 186  | 1.3 | 1.1 | 1.0 | 182  | 0.8 | 1.7 | 3.3 | AT1G04940 | expressed protein                                                                         |
| <b>699</b> | 254857_at | 86   | 1.4 | 2.0 | 1.7 | 132  | 1.0 | 0.9 | 3.3 | AT4G12120 | expressed protein                                                                         |
| <b>700</b> | 251769_at | 188  | 1.0 | 1.4 | 2.1 | 170  | 1.1 | 0.8 | 3.3 | AT3G55950 | protein kinase family                                                                     |
| <b>701</b> | 248426_at | 273  | 1.0 | 1.1 | 1.1 | 261  | 1.0 | 1.3 | 3.3 | AT5G51740 | expressed protein                                                                         |
| <b>702</b> | 263419_at | 951  | 1.3 | 1.7 | 1.5 | 743  | 0.9 | 1.2 | 3.3 | AT2G17220 | protein kinase -related                                                                   |
| <b>703</b> | 262930_at | 207  | 1.8 | 1.5 | 1.0 | 177  | 1.1 | 1.5 | 3.3 | AT1G65690 | expressed protein                                                                         |
| <b>704</b> | 248845_at | 214  | 1.4 | 3.4 | 3.3 | 168  | 1.4 | 1.4 | 3.3 | AT5G46480 | disease resistance protein (TIR class), putative                                          |
| <b>705</b> | 249988_at | 879  | 1.2 | 1.5 | 1.8 | 704  | 0.9 | 1.3 | 3.3 | AT5G18310 | expressed protein                                                                         |
| <b>706</b> | 246221_at | 776  | 0.8 | 0.9 | 0.8 | 626  | 0.7 | 1.5 | 3.3 | AT4G37120 | step II splicing factor - like protein                                                    |
| <b>707</b> | 246309_at | 296  | 1.2 | 1.2 | 1.0 | 230  | 1.0 | 1.4 | 3.2 | AT3G51790 | transmembrane protein G1p -related                                                        |
| <b>708</b> | 266761_at | 216  | 1.2 | 1.4 | 1.1 | 103  | 1.1 | 1.1 | 3.2 | AT2G47130 | short-chain dehydrogenase/reductase family protein                                        |
| <b>709</b> | 266345_at | 284  | 1.1 | 1.2 | 1.5 | 252  | 0.9 | 1.6 | 3.2 | AT2G01410 | hypothetical protein                                                                      |
| <b>710</b> | 247047_at | 143  | 0.8 | 2.7 | 4.5 | 94   | 1.1 | 1.1 | 3.2 | AT5G66650 | expressed protein                                                                         |
| <b>711</b> | 261812_at | 50   | 1.3 | 1.6 | 1.1 | 42   | 1.1 | 0.9 | 3.2 | AT1G08270 | hypothetical protein                                                                      |
| <b>712</b> | 259198_at | 254  | 0.9 | 1.0 | 1.0 | 230  | 1.0 | 1.4 | 3.2 | AT3G03610 | expressed protein                                                                         |
| <b>713</b> | 266775_at | 80   | 1.8 | 1.5 | 1.4 | 80   | 0.8 | 1.0 | 3.2 | AT2G29060 | scarecrow transcription factor family                                                     |
| <b>714</b> | 258777_at | 161  | 1.0 | 1.4 | 1.3 | 117  | 0.9 | 1.2 | 3.2 | AT3G11850 | expressed protein                                                                         |
| <b>715</b> | 267496_at | 210  | 1.2 | 1.4 | 1.4 | 328  | 0.8 | 0.6 | 3.2 | AT2G30550 | lipase (class 3) family                                                                   |
| <b>716</b> | 257700_at | 1387 | 1.1 | 2.0 | 2.1 | 1141 | 1.0 | 1.2 | 3.2 | AT3G12740 | membrane protein common family                                                            |
| <b>717</b> | 251497_at | 988  | 1.2 | 1.0 | 1.3 | 159  | 0.9 | 1.1 | 3.2 | AT3G59060 | bHLH protein family                                                                       |
| <b>718</b> | 261650_at | 692  | 1.5 | 2.8 | 2.6 | 603  | 0.9 | 1.0 | 3.2 | AT1G27770 | calcium-transporting ATPase 1, plasma membrane-type (Ca <sup>2+</sup> -ATPase, isoform 1) |
| <b>719</b> | 261377_at | 537  | 1.1 | 1.0 | 0.8 | 365  | 1.0 | 1.7 | 3.2 | AT1G18850 | expressed protein                                                                         |
| <b>720</b> | 259711_at | 58   | 0.9 | 1.6 | 1.3 | 66   | 0.9 | 1.2 | 3.2 | AT1G77570 | heat shock transcription factor family                                                    |

|     |             |      |     |     |      |      |     |     |     |           |                                                          |
|-----|-------------|------|-----|-----|------|------|-----|-----|-----|-----------|----------------------------------------------------------|
| 721 | 251652_at   | 79   | 1.2 | 1.0 | 1.3  | 67   | 0.8 | 0.8 | 3.2 | AT3G57380 | expressed protein                                        |
| 722 | 253628_at   | 1020 | 1.8 | 3.1 | 3.4  | 561  | 1.3 | 0.6 | 3.2 | AT4G30280 | xyloglucan endotransglycosylase, putative                |
| 723 | 247811_at   | 456  | 1.0 | 2.2 | 2.9  | 355  | 1.0 | 1.2 | 3.2 | AT5G58430 | leucine zipper-containing protein                        |
| 724 | 245765_at   | 1006 | 1.7 | 3.0 | 2.9  | 557  | 0.9 | 0.9 | 3.2 | AT1G33600 | leucine rich repeat protein family                       |
| 725 | 254759_at   | 1387 | 1.8 | 2.9 | 1.6  | 799  | 1.1 | 1.2 | 3.2 | AT4G13180 | short-chain dehydrogenase/reductase family protein       |
| 726 | 251636_at   | 652  | 1.3 | 2.8 | 2.8  | 519  | 1.2 | 1.2 | 3.2 | AT3G57530 | calcium-dependent protein kinase, putative (CDPK)        |
| 727 | 245119_at   | 109  | 1.0 | 3.8 | 7.6  | 154  | 0.9 | 1.1 | 3.2 | AT2G41640 | expressed protein                                        |
| 728 | 267266_at   | 417  | 1.1 | 1.2 | 0.9  | 255  | 1.2 | 1.5 | 3.2 | AT2G23150 | NRAMP metal ion transporter 3 (NRAMP3)                   |
| 729 | 245096_at   | 1517 | 1.2 | 1.2 | 1.7  | 1040 | 0.9 | 1.5 | 3.2 | AT2G40880 | cysteine proteinase inhibitor B (cystatin B) -related    |
| 730 | 264924_at   | 128  | 0.9 | 0.9 | 0.6  | 102  | 1.0 | 2.1 | 3.2 | AT1G60620 | RNA polymerase subunit                                   |
| 731 | 253147_at   | 272  | 1.2 | 1.6 | 1.7  | 235  | 1.1 | 1.1 | 3.2 | AT4G35600 | protein kinase family                                    |
| 732 | 259546_at   | 468  | 1.1 | 1.4 | 1.4  | 213  | 1.0 | 1.4 | 3.2 | AT1G35350 | hypothetical protein                                     |
| 733 | 258449_s_at | 1078 | 1.0 | 0.9 | 0.9  | 1196 | 0.9 | 1.8 | 3.2 | AT3G22310 | DEAD box RNA helicase, putative                          |
| 734 | 254924_at   | 655  | 1.3 | 1.7 | 1.4  | 352  | 1.0 | 1.3 | 3.2 | AT4G11330 | mitogen-activated protein kinase (MAPK), putative (MPK5) |
| 735 | 261655_at   | 405  | 1.1 | 1.0 | 1.2  | 438  | 0.9 | 1.8 | 3.1 | AT1G01940 | expressed protein                                        |
| 736 | 256505_at   | 204  | 1.4 | 1.0 | 1.1  | 201  | 1.1 | 2.5 | 3.1 | AT1G75200 | flavodoxin family                                        |
| 737 | 255967_at   | 546  | 1.3 | 2.1 | 2.0  | 518  | 1.1 | 1.1 | 3.1 | AT1G22280 | protein phosphatase 2C (PP2C), putative                  |
| 738 | 264211_at   | 3198 | 1.5 | 1.1 | 0.7  | 752  | 0.8 | 1.3 | 3.1 | AT1G22770 | gigantea protein -related                                |
| 739 | 267451_at   | 103  | 1.5 | 4.6 | 6.0  | 95   | 1.1 | 1.1 | 3.1 | AT2G33710 | AP2 domain transcription factor family                   |
| 740 | 249618_at   | 57   | 1.9 | 3.6 | 4.0  | 69   | 1.0 | 1.2 | 3.1 | AT5G37490 | expressed protein                                        |
| 741 | 251200_at   | 303  | 2.0 | 2.4 | 1.5  | 312  | 0.9 | 1.8 | 3.1 | AT3G63010 | expressed protein                                        |
| 742 | 257919_at   | 31   | 2.1 | 8.1 | 22.9 | 54   | 0.4 | 0.7 | 3.1 | AT3G23250 | myb family transcription factor(MYB15)                   |
| 743 | 252861_at   | 359  | 1.0 | 1.2 | 1.0  | 270  | 1.0 | 1.3 | 3.1 | AT4G39820 | expressed protein                                        |
| 744 | 248134_at   | 362  | 1.0 | 1.7 | 1.3  | 399  | 1.1 | 1.3 | 3.1 | AT5G54860 | expressed protein                                        |
| 745 | 255479_at   | 3572 | 1.2 | 2.5 | 3.2  | 2102 | 0.8 | 0.7 | 3.1 | AT4G02380 | late embryogenesis abundant protein family               |
| 746 | 258921_at   | 1082 | 1.4 | 1.9 | 1.5  | 928  | 1.0 | 1.2 | 3.1 | AT3G10500 | expressed protein                                        |
| 747 | 252679_at   | 53   | 0.6 | 9.4 | 16.3 | 70   | 1.1 | 1.4 | 3.1 | AT3G44260 | CCR4-associated factor 1-related protein                 |
| 748 | 254215_at   | 444  | 0.8 | 0.9 | 1.1  | 139  | 1.4 | 1.2 | 3.1 | AT4G23700 | cation/hydrogen exchanger, putative (CHX17)              |
| 749 | 259105_at   | 1003 | 1.0 | 1.1 | 1.1  | 1010 | 1.0 | 1.5 | 3.1 | AT3G05500 | stress related protein -related                          |
| 750 | 247379_at   | 107  | 1.2 | 1.4 | 1.2  | 75   | 0.9 | 1.1 | 3.1 | AT5G63370 | protein kinase family                                    |
| 751 | 254385_s_at | 252  | 0.8 | 1.4 | 1.5  | 309  | 1.0 | 0.7 | 3.1 | AT4G21830 | expressed protein                                        |
| 752 | 247014_at   | 507  | 1.1 | 1.0 | 0.9  | 414  | 1.0 | 1.7 | 3.1 | AT5G67630 | RuvB DNA helicase-related protein                        |
| 753 | 246779_at   | 284  | 1.3 | 1.8 | 1.4  | 244  | 1.3 | 1.4 | 3.1 | AT5G27520 | mitochondrial carrier protein family                     |
| 754 | 249987_at   | 227  | 1.2 | 2.6 | 2.9  | 198  | 1.0 | 0.9 | 3.1 | AT5G18490 | expressed protein                                        |
| 755 | 258729_at   | 1037 | 1.9 | 2.2 | 1.6  | 571  | 1.0 | 1.5 | 3.1 | AT3G11900 | amino acid transporter family                            |
| 756 | 261023_at   | 380  | 1.4 | 1.7 | 1.4  | 420  | 1.2 | 1.6 | 3.1 | AT1G12200 | flavin-containing monooxygenase (FMO) family             |
| 757 | 257861_at   | 180  | 1.0 | 1.4 | 1.5  | 162  | 1.5 | 1.1 | 3.1 | AT3G13050 | transporter - related                                    |

|            |           |      |     |     |     |      |     |     |     |           |                                                            |
|------------|-----------|------|-----|-----|-----|------|-----|-----|-----|-----------|------------------------------------------------------------|
| <b>758</b> | 262544_at | 543  | 1.1 | 1.0 | 0.9 | 509  | 0.9 | 1.5 | 3.1 | AT1G15420 | expressed protein                                          |
| <b>759</b> | 249769_at | 1482 | 4.3 | 2.9 | 1.6 | 291  | 0.9 | 1.4 | 3.1 | AT5G24120 | sigma-related factor (emb CAA77213.1)                      |
| <b>760</b> | 252940_at | 518  | 1.0 | 1.5 | 1.2 | 466  | 1.1 | 1.1 | 3.1 | AT4G39270 | leucine-rich repeat transmembrane protein kinase, putative |
| <b>761</b> | 251839_at | 140  | 1.2 | 2.0 | 1.4 | 192  | 1.0 | 1.3 | 3.1 | AT3G54950 | patatin-related                                            |
| <b>762</b> | 247851_at | 5724 | 1.2 | 1.1 | 1.0 | 2464 | 1.1 | 2.1 | 3.1 | AT5G58070 | outer membrane lipo protein - like                         |
| <b>763</b> | 247137_at | 327  | 1.4 | 2.6 | 2.9 | 258  | 1.1 | 1.4 | 3.1 | AT5G66210 | calcium-dependent protein kinase                           |
| <b>764</b> | 251187_at | 331  | 1.1 | 1.3 | 1.0 | 337  | 0.8 | 1.2 | 3.1 | AT3G62770 | expressed protein                                          |
| <b>765</b> | 267008_at | 217  | 1.4 | 2.1 | 1.9 | 227  | 0.6 | 1.1 | 3.1 | AT2G39350 | ABC transporter family protein                             |
| <b>766</b> | 258351_at | 187  | 1.0 | 1.2 | 1.3 | 158  | 0.7 | 1.0 | 3.1 | AT3G17700 | cyclic nucleotide-binding transporter 1 (CNBT1/CNGC20)     |
| <b>767</b> | 259751_at | 2006 | 1.0 | 1.1 | 1.9 | 328  | 1.6 | 2.2 | 3.1 | AT1G71030 | myb family transcription factor                            |
| <b>768</b> | 245266_at | 427  | 1.3 | 1.5 | 1.4 | 403  | 0.9 | 1.3 | 3.1 | AT4G17070 | expressed protein                                          |
| <b>769</b> | 256063_at | 120  | 1.1 | 1.3 | 2.0 | 67   | 0.9 | 1.3 | 3.1 | AT1G07130 | OB-fold nucleic acid binding domain-containing protein     |
| <b>770</b> | 246272_at | 1021 | 2.0 | 2.3 | 1.6 | 353  | 1.0 | 1.5 | 3.1 | AT4G37150 | hydrolase, alpha/beta fold family                          |
| <b>771</b> | 246327_at | 251  | 1.2 | 1.7 | 1.4 | 204  | 1.3 | 1.3 | 3.1 | AT1G16670 | protein kinase family                                      |
| <b>772</b> | 257652_at | 413  | 1.1 | 1.1 | 0.9 | 489  | 0.9 | 1.9 | 3.1 | AT3G16810 | expressed protein                                          |
| <b>773</b> | 260248_at | 681  | 0.8 | 0.4 | 0.2 | 130  | 0.8 | 1.7 | 3.1 | AT1G74310 | heat shock protein 101 (HSP101)                            |
| <b>774</b> | 264657_at | 189  | 0.9 | 0.8 | 1.0 | 236  | 1.0 | 2.3 | 3.0 | AT1G09100 | 26S protease regulatory subunit 6A                         |
| <b>775</b> | 251862_at | 180  | 0.8 | 1.2 | 1.0 | 171  | 1.0 | 1.4 | 3.0 | AT3G54850 | armadillo repeat containing protein                        |
| <b>776</b> | 253140_at | 413  | 1.4 | 2.4 | 2.7 | 319  | 1.0 | 1.0 | 3.0 | AT4G35480 | RING-H2 finger protein RHA3b                               |
| <b>777</b> | 246228_at | 146  | 1.4 | 1.1 | 1.1 | 220  | 1.0 | 3.8 | 3.0 | AT4G36430 | peroxidase, putative                                       |
| <b>778</b> | 253257_at | 394  | 1.2 | 1.7 | 1.8 | 311  | 1.2 | 0.9 | 3.0 | AT4G34390 | extra-large G-protein - like                               |
| <b>779</b> | 256425_at | 324  | 1.4 | 2.8 | 2.2 | 348  | 0.9 | 1.3 | 3.0 | AT1G33560 | disease resistance protein (CC-NBS-LRR class), putative    |
| <b>780</b> | 248774_at | 497  | 0.9 | 0.9 | 1.0 | 254  | 1.0 | 1.8 | 3.0 | AT5G47830 | expressed protein                                          |
| <b>781</b> | 249741_at | 1833 | 1.2 | 0.9 | 0.8 | 395  | 0.8 | 1.1 | 3.0 | AT5G24470 | pseudo-response regulator, APRR5 (APRR1/TOC1 family)       |
| <b>782</b> | 260362_at | 474  | 1.3 | 2.1 | 2.1 | 422  | 0.9 | 1.0 | 3.0 | AT1G70530 | protein kinase -related                                    |
| <b>783</b> | 262986_at | 470  | 1.3 | 2.7 | 5.4 | 333  | 1.3 | 2.7 | 3.0 | AT1G23390 | Kelch repeat containing F-box protein family               |
| <b>784</b> | 245114_at | 1397 | 1.0 | 1.5 | 1.8 | 1186 | 1.0 | 1.4 | 3.0 | AT2G41630 | transcription factor IIB (TFIIB)                           |
| <b>785</b> | 245887_at | 655  | 1.1 | 1.2 | 1.0 | 559  | 1.1 | 1.7 | 3.0 | AT5G09390 | expressed protein                                          |
| <b>786</b> | 261265_at | 100  | 1.5 | 1.5 | 2.0 | 129  | 1.3 | 0.9 | 3.0 | AT1G26800 | C3HC4-type zinc finger protein family                      |
| <b>787</b> | 266101_at | 763  | 1.1 | 1.7 | 1.9 | 675  | 0.9 | 1.1 | 3.0 | AT2G37940 | expressed protein                                          |
| <b>788</b> | 266983_at | 261  | 1.2 | 2.5 | 2.6 | 245  | 1.1 | 1.3 | 3.0 | AT2G39400 | hydrolase, alpha/beta fold family                          |
| <b>789</b> | 252134_at | 648  | 1.0 | 1.5 | 1.4 | 965  | 1.0 | 1.3 | 3.0 | AT3G50910 | expressed protein                                          |
| <b>790</b> | 258401_at | 865  | 1.6 | 1.8 | 1.2 | 758  | 1.0 | 1.2 | 3.0 | AT3G15430 | expressed protein                                          |
| <b>791</b> | 256981_at | 186  | 1.0 | 1.1 | 1.0 | 299  | 0.9 | 1.0 | 3.0 | AT3G13380 | brassinosteroid receptor kinase -related                   |
| <b>792</b> | 266168_at | 860  | 1.2 | 1.5 | 1.7 | 1006 | 0.9 | 1.5 | 3.0 | AT2G38870 | protease inhibitor -related                                |
| <b>793</b> | 251372_at | 595  | 1.2 | 1.0 | 0.8 | 320  | 1.0 | 1.1 | 3.0 | AT3G60520 | expressed protein                                          |
| <b>794</b> | 254248_at | 453  | 1.1 | 1.3 | 1.6 | 302  | 1.5 | 1.1 | 3.0 | AT4G23270 | serine/threonine kinase                                    |

|            |             |      |     |     |     |      |     |     |     |           |                                                       |
|------------|-------------|------|-----|-----|-----|------|-----|-----|-----|-----------|-------------------------------------------------------|
| <b>795</b> | 267444_at   | 159  | 1.1 | 1.3 | 1.3 | 132  | 1.2 | 2.1 | 3.0 | AT2G19180 | expressed protein                                     |
| <b>796</b> | 248629_at   | 284  | 1.3 | 1.4 | 1.0 | 230  | 1.1 | 1.8 | 3.0 | AT5G48970 | mitochondrial carrier protein family                  |
| <b>797</b> | 262691_at   | 1116 | 1.0 | 1.1 | 0.9 | 991  | 1.0 | 1.6 | 3.0 | AT1G62740 | stress inducible protein (sti), putative              |
| <b>798</b> | 260419_at   | 331  | 1.5 | 2.0 | 2.0 | 260  | 1.0 | 1.1 | 3.0 | AT1G69730 | WAK-like kinase (WLK)                                 |
| <b>799</b> | 251507_at   | 167  | 1.4 | 4.7 | 6.9 | 135  | 0.9 | 1.0 | 3.0 | AT3G59080 | expressed protein                                     |
| <b>800</b> | 249552_s_at | 86   | 2.0 | 2.7 | 2.3 | 92   | 1.2 | 1.2 | 3.0 | AT5G38240 | serine/threonine protein kinase, putative             |
| <b>801</b> | 260327_at   | 1295 | 1.5 | 2.4 | 2.5 | 1080 | 1.0 | 1.2 | 3.0 | AT1G63840 | RING-H2 finger protein, putative                      |
| <b>802</b> | 251072_at   | 526  | 0.9 | 0.5 | 0.5 | 238  | 1.0 | 1.7 | 3.0 | AT5G01740 | expressed protein                                     |
| <b>803</b> | 253879_s_at | 980  | 2.0 | 1.7 | 0.9 | 798  | 1.6 | 2.1 | 3.0 | AT4G27570 | glycosyltransferase family                            |
| <b>804</b> | 256522_at   | 70   | 1.1 | 1.7 | 2.6 | 65   | 1.1 | 1.0 | 3.0 | AT1G66160 | expressed protein                                     |
| <b>805</b> | 263334_at   | 1122 | 0.9 | 1.1 | 0.9 | 895  | 0.9 | 1.4 | 3.0 | AT2G03820 | nonsense-mediated mRNA decay protein -related         |
| <b>806</b> | 246289_at   | 1138 | 1.3 | 4.1 | 6.3 | 1079 | 0.9 | 0.9 | 3.0 | AT3G56880 | expressed protein                                     |
| <b>807</b> | 263931_at   | 237  | 1.2 | 2.2 | 3.5 | 110  | 1.2 | 1.1 | 3.0 | AT2G36220 | expressed protein                                     |
| <b>808</b> | 258349_at   | 775  | 2.4 | 2.6 | 2.1 | 234  | 0.9 | 1.2 | 3.0 | AT3G17609 | bZIP family transcription factor HYH                  |
| <b>809</b> | 267055_at   | 931  | 1.1 | 1.2 | 1.3 | 897  | 0.9 | 0.9 | 3.0 | AT2G38360 | expressed protein                                     |
| <b>810</b> | 247734_at   | 682  | 1.1 | 1.1 | 1.2 | 201  | 1.1 | 1.8 | 3.0 | AT5G59400 | expressed protein                                     |
| <b>811</b> | 245209_at   | 131  | 0.8 | 1.8 | 2.4 | 111  | 1.4 | 1.4 | 3.0 | AT5G12340 | hypothetical protein                                  |
| <b>812</b> | 250502_at   | 1214 | 1.3 | 0.8 | 0.7 | 1216 | 0.9 | 2.0 | 3.0 | AT5G09590 | heat shock protein mtHsc70-2 (Hsc70-5)                |
| <b>813</b> | 265087_at   | 113  | 1.4 | 1.1 | 1.2 | 101  | 0.8 | 1.9 | 3.0 | AT1G03760 | expressed protein                                     |
| <b>814</b> | 265679_at   | 1470 | 1.0 | 1.0 | 0.7 | 1776 | 0.9 | 1.5 | 3.0 | AT2G32240 | myosin heavy chain -related                           |
| <b>815</b> | 267330_at   | 593  | 1.1 | 1.1 | 1.0 | 412  | 1.1 | 1.3 | 3.0 | AT2G19270 | expressed protein                                     |
| <b>816</b> | 259461_at   | 432  | 1.4 | 1.7 | 1.0 | 304  | 1.1 | 1.4 | 3.0 | AT1G18900 | pentatricopeptide (PPR) repeat-containing protein     |
| <b>817</b> | 258476_at   | 55   | 1.0 | 0.9 | 1.2 | 43   | 1.6 | 1.5 | 3.0 | AT3G02400 | hypothetical protein                                  |
| <b>818</b> | 246850_at   | 258  | 1.0 | 0.8 | 0.7 | 305  | 1.3 | 2.5 | 3.0 | AT5G26860 | Lon protease homolog 2 precursor                      |
| <b>819</b> | 250259_at   | 394  | 0.8 | 1.1 | 1.0 | 323  | 1.1 | 1.7 | 3.0 | AT5G13800 | hydrolase, alpha/beta fold family                     |
| <b>820</b> | 249322_at   | 764  | 1.1 | 1.2 | 0.9 | 653  | 0.9 | 1.5 | 3.0 | AT5G40930 | protein import receptor TOM20, mitochondrial-related  |
| <b>821</b> | 250858_at   | 141  | 1.2 | 2.1 | 2.1 | 158  | 1.1 | 1.4 | 3.0 | AT5G04760 | myb family transcription factor                       |
| <b>822</b> | 260878_at   | 428  | 1.7 | 1.9 | 1.6 | 280  | 1.0 | 1.3 | 3.0 | AT1G21450 | scarecrow-like transcription factor 1 (SCL1)          |
| <b>823</b> | 261973_at   | 155  | 1.2 | 2.0 | 2.3 | 115  | 1.0 | 1.2 | 3.0 | AT1G64610 | expressed protein                                     |
| <b>824</b> | 253111_at   | 336  | 1.1 | 1.7 | 1.9 | 311  | 0.9 | 0.9 | 3.0 | AT4G35940 | expressed protein                                     |
| <b>825</b> | 267076_at   | 1213 | 1.3 | 1.7 | 2.1 | 1425 | 1.1 | 1.3 | 3.0 | AT2G41090 | calmodulin-like calcium binding protein (CaBP-22)     |
| <b>826</b> | 260847_s_at | 3008 | 1.1 | 1.5 | 1.3 | 2271 | 1.1 | 1.8 | 2.9 | AT1G17290 | alanine aminotransferase, putative                    |
| <b>827</b> | 267627_at   | 192  | 1.0 | 1.3 | 1.0 | 231  | 1.0 | 1.3 | 2.9 | AT2G42270 | U5 small nuclear ribonucleoprotein helicase, putative |
| <b>828</b> | 254158_at   | 272  | 1.4 | 6.3 | 9.2 | 338  | 1.0 | 1.0 | 2.9 | AT4G24380 | expressed protein                                     |
| <b>829</b> | 253841_at   | 1191 | 1.0 | 1.1 | 1.0 | 812  | 1.1 | 1.7 | 2.9 | AT4G27830 | glycosyl hydrolase family 1                           |
| <b>830</b> | 265648_at   | 367  | 1.1 | 1.5 | 1.8 | 315  | 0.9 | 1.2 | 2.9 | AT2G27500 | glycosyl hydrolase family 17                          |
| <b>831</b> | 260551_at   | 705  | 0.9 | 1.1 | 1.3 | 895  | 1.1 | 1.9 | 2.9 | AT2G43510 | trypsin inhibitor -related                            |

|            |             |      |     |     |     |      |     |     |     |           |                                                                          |
|------------|-------------|------|-----|-----|-----|------|-----|-----|-----|-----------|--------------------------------------------------------------------------|
| <b>832</b> | 263401_at   | 67   | 1.4 | 1.5 | 1.4 | 80   | 1.2 | 0.8 | 2.9 | AT2G04070 | MATE efflux protein family                                               |
| <b>833</b> | 265306_at   | 259  | 1.4 | 1.2 | 0.8 | 228  | 0.9 | 1.0 | 2.9 | AT2G20320 | expressed protein                                                        |
| <b>834</b> | 247618_at   | 22   | 0.8 | 1.9 | 3.9 | 30   | 1.3 | 1.4 | 2.9 | AT5G60280 | receptor like protein kinase                                             |
| <b>835</b> | 262611_at   | 177  | 1.2 | 1.4 | 1.1 | 174  | 1.1 | 1.6 | 2.9 | AT1G14060 | expressed protein                                                        |
| <b>836</b> | 258998_at   | 374  | 1.5 | 2.7 | 2.6 | 343  | 0.9 | 1.5 | 2.9 | AT3G01820 | adenylate kinase -related                                                |
| <b>837</b> | 265868_at   | 483  | 1.1 | 1.3 | 1.2 | 391  | 1.2 | 1.4 | 2.9 | AT2G01650 | expressed protein                                                        |
| <b>838</b> | 258202_at   | 492  | 1.0 | 1.1 | 1.0 | 503  | 1.0 | 1.7 | 2.9 | AT3G13940 | expressed protein                                                        |
| <b>839</b> | 262624_at   | 109  | 1.3 | 1.2 | 1.6 | 101  | 0.9 | 1.1 | 2.9 | AT1G06450 | CCR4-associated factor -related                                          |
| <b>840</b> | 253496_at   | 1307 | 3.5 | 3.0 | 2.0 | 425  | 1.7 | 3.0 | 2.9 | AT4G31870 | glutathione peroxidase, putative                                         |
| <b>841</b> | 251915_at   | 202  | 1.2 | 1.0 | 1.0 | 211  | 0.8 | 1.4 | 2.9 | AT3G53940 | mitochondrial carrier protein family                                     |
| <b>842</b> | 266109_at   | 166  | 1.0 | 1.6 | 1.0 | 213  | 0.9 | 1.4 | 2.9 | AT2G37890 | mitochondrial carrier protein family                                     |
| <b>843</b> | 258871_at   | 116  | 0.9 | 1.5 | 0.8 | 265  | 0.8 | 1.9 | 2.9 | AT3G03060 | 26S proteasome regulatory subunit -related                               |
| <b>844</b> | 262950_at   | 493  | 1.2 | 1.1 | 1.1 | 435  | 0.9 | 1.4 | 2.9 | AT1G75510 | transcription initiation factor -related                                 |
| <b>845</b> | 256854_at   | 249  | 1.1 | 1.3 | 1.1 | 252  | 1.0 | 2.3 | 2.9 | AT3G15180 | expressed protein                                                        |
| <b>846</b> | 251035_at   | 65   | 2.2 | 3.1 | 3.1 | 68   | 0.8 | 1.3 | 2.9 | AT5G02220 | expressed protein                                                        |
| <b>847</b> | 255452_at   | 334  | 1.1 | 1.1 | 1.1 | 275  | 0.9 | 1.5 | 2.9 | AT4G02880 | expressed protein                                                        |
| <b>848</b> | 251624_at   | 1834 | 1.1 | 1.5 | 1.6 | 1590 | 1.0 | 1.7 | 2.9 | AT3G57280 | expressed protein                                                        |
| <b>849</b> | 254050_s_at | 712  | 0.9 | 1.6 | 1.3 | 627  | 1.2 | 1.4 | 2.9 | AT4G25670 | expressed protein                                                        |
| <b>850</b> | 259137_at   | 573  | 1.3 | 1.5 | 1.6 | 423  | 1.0 | 1.1 | 2.9 | AT3G10300 | calcium-binding EF-hand family protein                                   |
| <b>851</b> | 256451_s_at | 289  | 1.5 | 1.7 | 1.2 | 309  | 1.0 | 1.3 | 2.9 | AT1G75170 | sec14 cytosolic factor family (phosphoglyceride transfer protein family) |
| <b>852</b> | 249796_at   | 1556 | 1.1 | 0.9 | 0.9 | 1278 | 1.1 | 2.3 | 2.9 | AT5G23540 | 26S proteasome regulatory subunit (RPN11), putative                      |
| <b>853</b> | 246042_at   | 2004 | 1.3 | 1.6 | 1.3 | 2209 | 1.1 | 1.8 | 2.9 | AT5G19440 | cinnamyl-alcohol dehydrogenase (CAD), putative                           |
| <b>854</b> | 257708_at   | 851  | 1.1 | 1.0 | 0.8 | 769  | 1.2 | 1.9 | 2.9 | AT3G13330 | expressed protein                                                        |
| <b>855</b> | 264591_at   | 327  | 1.0 | 1.1 | 1.3 | 356  | 0.7 | 1.4 | 2.9 | AT2G17670 | pentatricopeptide (PPR) repeat-containing protein                        |
| <b>856</b> | 252303_at   | 461  | 1.1 | 1.0 | 0.6 | 211  | 1.2 | 1.1 | 2.9 | AT3G49210 | expressed protein                                                        |
| <b>857</b> | 257766_at   | 797  | 1.6 | 2.1 | 2.0 | 485  | 1.0 | 1.1 | 2.9 | AT3G23030 | auxin-responsive protein IAA2 (Indoleacetic acid-induced protein 2)      |
| <b>858</b> | 259655_at   | 1167 | 0.9 | 0.9 | 0.7 | 1044 | 0.8 | 1.1 | 2.9 | AT1G55210 | disease resistance response protein-related/ dirigent protein-related    |
| <b>859</b> | 264635_at   | 289  | 1.0 | 1.0 | 1.3 | 327  | 0.8 | 1.6 | 2.9 | AT1G65500 | expressed protein                                                        |
| <b>860</b> | 254291_at   | 1431 | 1.1 | 1.5 | 1.4 | 1117 | 1.0 | 1.2 | 2.9 | AT4G23010 | expressed protein                                                        |
| <b>861</b> | 265902_at   | 157  | 0.9 | 1.3 | 1.2 | 85   | 1.5 | 2.2 | 2.9 | AT2G25590 | hypothetical protein                                                     |
| <b>862</b> | 258707_at   | 67   | 1.0 | 0.9 | 1.1 | 90   | 0.8 | 1.1 | 2.9 | AT3G09480 | histone H2B, putative                                                    |
| <b>863</b> | 258166_at   | 207  | 1.2 | 1.3 | 0.8 | 232  | 0.9 | 2.0 | 2.9 | AT3G21540 | transducin / WD-40 repeat protein family                                 |
| <b>864</b> | 247125_at   | 457  | 1.3 | 3.8 | 5.9 | 408  | 1.0 | 0.8 | 2.9 | AT5G66070 | C3HC4-type zinc finger protein family                                    |
| <b>865</b> | 261718_at   | 590  | 1.2 | 1.6 | 1.4 | 459  | 1.0 | 0.9 | 2.9 | AT1G18390 | protein kinase family                                                    |
| <b>866</b> | 253132_at   | 162  | 0.9 | 1.0 | 0.6 | 103  | 1.1 | 1.7 | 2.9 | AT4G35580 | NAM / CUC2 -related protein                                              |



|            |             |      |     |     |     |      |     |     |     |           |                                                                                  |
|------------|-------------|------|-----|-----|-----|------|-----|-----|-----|-----------|----------------------------------------------------------------------------------|
| <b>867</b> | 249128_at   | 265  | 1.0 | 0.9 | 1.1 | 191  | 0.7 | 1.0 | 2.9 | AT5G43440 | 2-oxoglutarate-dependent dioxygenase, putative                                   |
| <b>868</b> | 261161_at   | 125  | 1.5 | 2.4 | 2.8 | 166  | 1.4 | 0.8 | 2.9 | AT1G34420 | leucine rich repeat protein kinase family                                        |
| <b>869</b> | 256525_at   | 1218 | 0.9 | 1.3 | 1.8 | 547  | 1.0 | 0.9 | 2.9 | AT1G66180 | expressed protein                                                                |
| <b>870</b> | 260697_at   | 294  | 1.3 | 1.3 | 1.1 | 210  | 1.2 | 1.9 | 2.9 | AT1G32530 | C3HC4-type zinc finger protein family                                            |
| <b>871</b> | 263274_at   | 529  | 1.2 | 1.6 | 1.6 | 490  | 1.2 | 1.4 | 2.9 | AT2G11520 | protein kinase family                                                            |
| <b>872</b> | 248551_at   | 402  | 1.3 | 1.2 | 0.8 | 667  | 0.7 | 1.3 | 2.9 | AT5G50200 | expressed protein                                                                |
| <b>873</b> | 250736_s_at | 424  | 0.9 | 1.0 | 0.9 | 347  | 0.9 | 1.5 | 2.9 | AT5G06420 | expressed protein                                                                |
| <b>874</b> | 254952_at   | 112  | 1.2 | 1.6 | 1.4 | 128  | 0.9 | 0.9 | 2.9 | AT4G10960 | UDP-glucose 4-epimerase (UDP-galactose 4-epimerase) (Galactowaldenase), putative |
| <b>875</b> | 262571_at   | 370  | 1.2 | 2.1 | 2.0 | 355  | 0.9 | 0.8 | 2.9 | AT1G15430 | expressed protein                                                                |
| <b>876</b> | 247155_at   | 225  | 0.8 | 0.8 | 0.9 | 220  | 1.1 | 1.7 | 2.9 | AT5G65750 | 2-oxoglutarate dehydrogenase, E1 component                                       |
| <b>877</b> | 264929_at   | 48   | 1.5 | 3.4 | 1.1 | 93   | 0.6 | 0.8 | 2.9 | AT1G60730 | aldo/keto reductase family                                                       |
| <b>878</b> | 253284_at   | 1101 | 1.5 | 4.4 | 5.1 | 907  | 1.1 | 1.2 | 2.9 | AT4G34150 | C2 domain-containing protein                                                     |
| <b>879</b> | 264841_at   | 243  | 1.1 | 2.0 | 1.6 | 223  | 1.2 | 0.9 | 2.9 | AT1G03740 | protein kinase family                                                            |
| <b>880</b> | 252053_at   | 405  | 1.1 | 3.1 | 3.6 | 315  | 1.0 | 0.9 | 2.9 | AT3G52400 | syntaxin of plants SYP122                                                        |
| <b>881</b> | 264485_at   | 221  | 1.0 | 1.2 | 1.1 | 163  | 1.3 | 1.6 | 2.9 | AT1G77220 | expressed protein                                                                |
| <b>882</b> | 254229_at   | 45   | 0.7 | 2.4 | 5.1 | 50   | 1.0 | 0.9 | 2.9 | AT4G23610 | expressed protein                                                                |
| <b>883</b> | 248195_at   | 401  | 1.2 | 0.9 | 1.0 | 264  | 1.2 | 1.4 | 2.9 | AT5G54110 | VAMP (vesicle-associated membrane protein)-associated protein family             |
| <b>884</b> | 264351_at   | 285  | 1.4 | 1.5 | 1.2 | 258  | 1.1 | 1.1 | 2.9 | AT1G03370 | C2 domain/GRAM domain-containing protein                                         |
| <b>885</b> | 266746_s_at | 3236 | 1.1 | 0.9 | 0.8 | 1718 | 1.0 | 1.5 | 2.9 | AT2G02930 | glutathione transferase, putative                                                |
| <b>886</b> | 262360_at   | 270  | 1.3 | 2.1 | 2.3 | 211  | 1.1 | 0.7 | 2.9 | AT1G73080 | leucine-rich repeat transmembrane protein kinase, putative                       |
| <b>887</b> | 257517_at   | 38   | 2.3 | 7.9 | 2.1 | 86   | 1.6 | 1.7 | 2.8 | AT3G16330 | expressed protein                                                                |
| <b>888</b> | 255500_at   | 212  | 1.1 | 1.3 | 1.0 | 213  | 0.9 | 1.8 | 2.8 | AT4G02390 | NAD+ ADP-ribosyltransferase                                                      |
| <b>889</b> | 266832_at   | 89   | 7.2 | 8.8 | 6.5 | 114  | 1.3 | 1.9 | 2.8 | AT2G30040 | protein kinase family                                                            |
| <b>890</b> | 263807_at   | 1036 | 1.0 | 1.1 | 0.9 | 1396 | 1.0 | 1.4 | 2.8 | AT2G04400 | indole-3-glycerol phosphate synthase (IGPS)                                      |
| <b>891</b> | 263734_at   | 73   | 0.8 | 1.5 | 1.2 | 59   | 0.9 | 1.3 | 2.8 | AT1G60030 | permease -related                                                                |
| <b>892</b> | 245227_s_at | 119  | 1.1 | 0.9 | 0.8 | 84   | 1.2 | 1.4 | 2.8 | AT1G08410 | expressed protein                                                                |
| <b>893</b> | 247594_at   | 67   | 1.0 | 1.1 | 2.9 | 125  | 0.9 | 1.1 | 2.8 | AT5G60800 | heavy-metal-associated domain-containing protein                                 |
| <b>894</b> | 253252_at   | 1071 | 1.6 | 1.3 | 1.2 | 530  | 1.0 | 1.9 | 2.8 | AT4G34740 | amidophosphoribosyltransferase 2 precursor                                       |
| <b>895</b> | 267168_at   | 127  | 1.4 | 1.5 | 1.1 | 297  | 1.0 | 2.6 | 2.8 | AT2G37770 | aldo/keto reductase family                                                       |
| <b>896</b> | 245975_at   | 482  | 1.3 | 1.2 | 1.1 | 527  | 1.0 | 1.3 | 2.8 | AT5G13070 | expressed protein                                                                |
| <b>897</b> | 255469_at   | 496  | 0.8 | 1.2 | 1.3 | 442  | 0.9 | 1.5 | 2.8 | AT4G03030 | Kelch repeat containing F-box protein family                                     |
| <b>898</b> | 247290_at   | 43   | 1.7 | 2.6 | 3.1 | 51   | 0.3 | 0.7 | 2.8 | AT5G64450 | hypothetical protein                                                             |
| <b>899</b> | 259426_at   | 1417 | 1.1 | 1.2 | 1.4 | 1614 | 1.1 | 1.5 | 2.8 | AT1G01470 | expressed protein                                                                |
| <b>900</b> | 264015_at   | 258  | 1.0 | 0.9 | 0.8 | 202  | 1.3 | 2.1 | 2.8 | AT2G21150 | XAP-5 protein (Homo sapiens) -related                                            |
| <b>901</b> | 246584_at   | 177  | 2.8 | 9.5 | 8.0 | 180  | 0.8 | 1.0 | 2.8 | AT5G14730 | expressed protein                                                                |
| <b>902</b> | 267064_at   | 1107 | 1.3 | 1.7 | 2.0 | 814  | 1.0 | 1.0 | 2.8 | AT2G41110 | calmodulin                                                                       |

|            |           |      |     |      |      |      |     |     |     |           |                                                                                        |
|------------|-----------|------|-----|------|------|------|-----|-----|-----|-----------|----------------------------------------------------------------------------------------|
| <b>903</b> | 262193_at | 1178 | 1.2 | 1.2  | 0.9  | 960  | 0.9 | 1.4 | 2.8 | AT1G77840 | eukaryotic initiation factor 5 (eIF-5) -related                                        |
| <b>904</b> | 257058_at | 299  | 1.1 | 1.5  | 1.4  | 320  | 0.8 | 1.5 | 2.8 | AT3G15352 | expressed protein                                                                      |
| <b>905</b> | 256735_at | 497  | 1.3 | 1.3  | 1.2  | 315  | 1.3 | 1.1 | 2.8 | AT3G29400 | exocyst subunit EXO70 family                                                           |
| <b>906</b> | 256863_at | 132  | 1.3 | 1.3  | 1.1  | 105  | 1.0 | 1.2 | 2.8 | AT3G24070 | Zn-finger, CCHC type domain-containing protein                                         |
| <b>907</b> | 256598_at | 808  | 1.3 | 0.6  | 0.3  | 525  | 1.0 | 1.6 | 2.8 | AT3G30180 | cytochrome p450, putative                                                              |
| <b>908</b> | 267073_at | 963  | 1.2 | 1.3  | 1.2  | 651  | 1.0 | 1.3 | 2.8 | AT2G41160 | expressed protein                                                                      |
| <b>909</b> | 252921_at | 110  | 1.0 | 1.4  | 1.6  | 181  | 1.3 | 0.9 | 2.8 | AT4G39030 | enhanced disease susceptibility 5 (Eds5) (salicylic acid induction deficient 1) (Sid1) |
| <b>910</b> | 251659_at | 1260 | 1.1 | 1.2  | 1.2  | 1185 | 1.0 | 1.4 | 2.8 | AT3G57090 | expressed protein                                                                      |
| <b>911</b> | 257822_at | 1433 | 1.0 | 0.8  | 0.7  | 1142 | 1.0 | 1.8 | 2.8 | AT3G25230 | peptidylprolyl isomerase (ROF1)                                                        |
| <b>912</b> | 266076_at | 197  | 0.9 | 1.1  | 0.8  | 168  | 1.4 | 1.8 | 2.8 | AT2G40700 | DEAD/DEAH box helicase, putative                                                       |
| <b>913</b> | 252009_at | 1208 | 1.4 | 3.3  | 4.5  | 882  | 1.1 | 1.2 | 2.8 | AT3G52800 | zinc finger - like protein                                                             |
| <b>914</b> | 253777_at | 480  | 1.1 | 1.0  | 0.9  | 529  | 0.9 | 1.7 | 2.8 | AT4G28450 | transducin / WD-40 repeat protein family                                               |
| <b>915</b> | 257951_at | 171  | 1.1 | 1.3  | 1.3  | 160  | 1.3 | 0.9 | 2.8 | AT3G21700 | SGP1 monomeric G-protein -related                                                      |
| <b>916</b> | 247350_at | 167  | 1.0 | 1.4  | 1.0  | 138  | 1.1 | 1.0 | 2.8 | AT5G63830 | expressed protein                                                                      |
| <b>917</b> | 258965_at | 509  | 1.0 | 0.8  | 0.6  | 503  | 0.8 | 1.9 | 2.8 | AT3G10530 | transducin / WD-40 repeat protein family                                               |
| <b>918</b> | 266835_at | 149  | 1.1 | 1.2  | 1.4  | 185  | 1.0 | 1.0 | 2.8 | AT2G29990 | NADH dehydrogenase family                                                              |
| <b>919</b> | 249652_at | 541  | 1.1 | 1.6  | 2.1  | 538  | 1.0 | 1.1 | 2.8 | AT5G37070 | hypothetical protein                                                                   |
| <b>920</b> | 252827_at | 871  | 0.8 | 1.3  | 1.6  | 1218 | 0.9 | 0.8 | 2.8 | AT4G39950 | cytochrome P450 79B2                                                                   |
| <b>921</b> | 247532_at | 88   | 1.0 | 1.1  | 1.4  | 81   | 0.6 | 1.1 | 2.8 | AT5G61560 | protein kinase family                                                                  |
| <b>922</b> | 266737_at | 113  | 1.3 | 2.5  | 3.1  | 125  | 0.8 | 0.7 | 2.8 | AT2G47140 | short-chain dehydrogenase/reductase family protein                                     |
| <b>923</b> | 254839_at | 381  | 1.1 | 0.6  | 0.5  | 195  | 1.0 | 1.2 | 2.8 | AT4G12400 | stress inducible protein (sti), putative                                               |
| <b>924</b> | 253203_at | 2850 | 1.2 | 1.2  | 0.9  | 2406 | 1.0 | 1.4 | 2.8 | AT4G34710 | arginine decarboxylase SPE2                                                            |
| <b>925</b> | 252587_at | 480  | 0.9 | 1.0  | 1.0  | 476  | 1.2 | 1.4 | 2.8 | AT3G45620 | transducin / WD-40 repeat protein family                                               |
| <b>926</b> | 260399_at | 15   | 1.4 | 23.3 | 30.6 | 43   | 0.1 | 0.7 | 2.8 | AT1G72520 | lipoxygenase (LOX), putative                                                           |
| <b>927</b> | 257644_at | 115  | 1.2 | 2.7  | 5.1  | 205  | 0.9 | 0.7 | 2.8 | AT3G25780 | allene oxide cyclase family                                                            |
| <b>928</b> | 261823_at | 252  | 1.7 | 1.7  | 0.9  | 212  | 1.0 | 1.4 | 2.8 | AT1G11400 | expressed protein                                                                      |
| <b>929</b> | 262482_at | 135  | 0.9 | 1.1  | 1.1  | 177  | 1.0 | 1.4 | 2.8 | AT1G17020 | oxidoreductase, 2OG-Fe(II) oxygenase family                                            |
| <b>930</b> | 258062_at | 651  | 1.1 | 1.6  | 1.5  | 518  | 1.1 | 1.2 | 2.8 | AT3G26000 | F-box protein family                                                                   |
| <b>931</b> | 254346_at | 742  | 0.9 | 1.1  | 1.1  | 644  | 1.2 | 1.3 | 2.8 | AT4G21980 | symbiosis-related like protein                                                         |
| <b>932</b> | 256055_at | 234  | 1.2 | 1.1  | 1.0  | 214  | 1.1 | 1.4 | 2.8 | AT1G07030 | mitochondrial carrier protein family                                                   |
| <b>933</b> | 265886_at | 245  | 1.8 | 1.7  | 0.7  | 175  | 1.1 | 1.5 | 2.8 | AT2G25620 | protein phosphatase 2C (PP2C), putative                                                |
| <b>934</b> | 258380_at | 203  | 0.9 | 1.0  | 1.1  | 208  | 1.1 | 1.9 | 2.8 | AT3G16650 | PP1/PP2A phosphatases pleiotropic regulator PRL2                                       |
| <b>935</b> | 247395_at | 363  | 1.3 | 1.4  | 1.4  | 321  | 0.9 | 1.2 | 2.8 | AT5G62910 | expressed protein                                                                      |
| <b>936</b> | 256725_at | 937  | 1.3 | 1.3  | 1.0  | 536  | 1.0 | 1.5 | 2.8 | AT2G34070 | expressed protein                                                                      |
| <b>937</b> | 245796_at | 1799 | 1.0 | 1.2  | 0.8  | 1636 | 1.1 | 1.5 | 2.8 | AT1G32230 | expressed protein                                                                      |
| <b>938</b> | 255880_at | 457  | 1.0 | 2.1  | 2.2  | 368  | 1.0 | 1.0 | 2.8 | AT1G67060 | expressed protein                                                                      |
| <b>939</b> | 259979_at | 304  | 2.0 | 10.6 | 12.6 | 344  | 1.0 | 0.9 | 2.8 | AT1G76600 | expressed protein                                                                      |

|     |             |      |     |     |     |      |     |     |     |           |                                                                          |
|-----|-------------|------|-----|-----|-----|------|-----|-----|-----|-----------|--------------------------------------------------------------------------|
| 940 | 258436_at   | 139  | 1.1 | 6.0 | 7.7 | 177  | 1.2 | 1.2 | 2.8 | AT3G16720 | RING zinc finger protein -related                                        |
| 941 | 255434_at   | 308  | 1.2 | 1.0 | 0.6 | 212  | 1.1 | 1.8 | 2.8 | AT4G03180 | expressed protein                                                        |
| 942 | 266259_at   | 166  | 1.3 | 2.2 | 2.8 | 254  | 1.2 | 1.8 | 2.8 | AT2G27830 | expressed protein                                                        |
| 943 | 262882_at   | 644  | 1.5 | 1.4 | 1.5 | 450  | 1.0 | 1.5 | 2.8 | AT1G64900 | cytochrome P450, putative                                                |
| 944 | 253993_at   | 254  | 1.3 | 1.8 | 1.6 | 347  | 0.8 | 0.8 | 2.8 | AT4G26070 | mitogen-activated protein kinase kinase (MAPKK)(MKK1/MEK1)               |
| 945 | 262118_at   | 835  | 1.1 | 1.2 | 1.1 | 1342 | 1.1 | 2.3 | 2.8 | AT1G02850 | glycosyl hydrolase family 1                                              |
| 946 | 245156_at   | 191  | 1.2 | 1.7 | 1.3 | 155  | 1.2 | 1.2 | 2.8 | AT5G12480 | calcium-dependent protein kinase 7 (CDPK)(CPK7)                          |
| 947 | 259749_at   | 260  | 1.1 | 1.6 | 1.8 | 190  | 0.8 | 1.1 | 2.7 | AT1G71100 | ribose 5-phosphate isomerase -related                                    |
| 948 | 248138_at   | 1992 | 1.7 | 1.8 | 0.9 | 1677 | 1.0 | 1.7 | 2.7 | AT5G54960 | pyruvate decarboxylase (gb AAB16855.1)                                   |
| 949 | 247257_at   | 340  | 1.3 | 1.2 | 1.0 | 316  | 1.1 | 1.9 | 2.7 | AT5G64760 | 26S proteasome regulatory subunit (RPN5), putative                       |
| 950 | 259793_at   | 131  | 1.0 | 1.8 | 0.8 | 146  | 0.9 | 0.9 | 2.7 | AT1G64380 | AP2 domain transcription factor RAP2, putative                           |
| 951 | 263221_at   | 293  | 1.0 | 1.1 | 1.2 | 242  | 0.8 | 0.9 | 2.7 | AT1G30620 | NAD-dependent epimerase/dehydratase family                               |
| 952 | 256057_at   | 695  | 1.2 | 1.3 | 1.5 | 152  | 1.4 | 2.3 | 2.7 | AT1G07180 | NADH dehydrogenase family                                                |
| 953 | 266368_at   | 975  | 1.2 | 1.2 | 0.8 | 667  | 1.1 | 0.7 | 2.7 | AT2G41380 | embryo-abundant protein -related                                         |
| 954 | 250536_at   | 134  | 1.0 | 1.5 | 1.3 | 135  | 1.1 | 1.0 | 2.7 | AT5G08535 | expressed protein                                                        |
| 955 | 257902_at   | 676  | 1.0 | 1.4 | 1.4 | 549  | 1.1 | 1.0 | 2.7 | AT3G28450 | leucine-rich repeat transmembrane protein kinase, putative               |
| 956 | 267604_at   | 61   | 1.8 | 1.7 | 1.8 | 70   | 1.1 | 0.8 | 2.7 | AT2G32930 | expressed protein                                                        |
| 957 | 262656_at   | 195  | 1.4 | 1.1 | 1.5 | 195  | 1.0 | 1.5 | 2.7 | AT1G14200 | C3HC4-type zinc finger protein family                                    |
| 958 | 266510_at   | 580  | 1.0 | 1.0 | 0.8 | 455  | 0.6 | 1.5 | 2.7 | AT2G47990 | transducin / WD-40 repeat protein family                                 |
| 959 | 253919_at   | 190  | 1.0 | 1.2 | 1.6 | 121  | 1.5 | 1.5 | 2.7 | AT4G27350 | membrane lipo protein lipid attachment site-containing expressed protein |
| 960 | 251951_s_at | 447  | 0.9 | 1.0 | 1.0 | 460  | 1.0 | 1.7 | 2.7 | AT3G53630 | expressed protein                                                        |
| 961 | 252252_at   | 196  | 1.0 | 1.2 | 1.3 | 202  | 0.8 | 1.9 | 2.7 | AT3G49180 | transducin / WD-40 repeat protein family                                 |
| 962 | 252108_at   | 158  | 1.6 | 2.1 | 1.5 | 146  | 1.2 | 1.5 | 2.7 | AT3G51530 | expressed protein                                                        |
| 963 | 247925_at   | 1283 | 1.2 | 4.5 | 5.3 | 725  | 0.9 | 1.1 | 2.7 | AT5G57560 | xyloglucan endotransglycosylase (TCH4)                                   |
| 964 | 250882_at   | 104  | 2.8 | 2.7 | 1.9 | 71   | 1.5 | 1.8 | 2.7 | AT5G04000 | expressed protein                                                        |
| 965 | 265192_at   | 449  | 1.1 | 1.4 | 1.5 | 468  | 1.0 | 1.4 | 2.7 | AT1G05060 | expressed protein                                                        |
| 966 | 257053_at   | 238  | 1.1 | 2.9 | 4.9 | 301  | 1.6 | 1.2 | 2.7 | AT3G15210 | ethylene responsive element binding factor 4 (ERF4)                      |
| 967 | 251311_at   | 671  | 0.9 | 1.0 | 0.9 | 616  | 1.1 | 1.8 | 2.7 | AT3G61140 | COP9 complex subunit, FUS6                                               |
| 968 | 247081_at   | 173  | 1.6 | 1.5 | 1.5 | 148  | 1.2 | 1.6 | 2.7 | AT5G66130 | AtRAD17 (dbj BAA90479.1)                                                 |
| 969 | 259518_at   | 511  | 1.2 | 1.9 | 2.4 | 355  | 1.1 | 1.3 | 2.7 | AT1G20510 | 4-coumarate:CoA ligase 1 (4-coumaroyl-CoA synthase 1) (4CL1) family      |
| 970 | 260323_at   | 774  | 1.1 | 1.0 | 0.9 | 744  | 1.0 | 1.7 | 2.7 | AT1G63780 | U3 small nucleolar ribonucleo proteinprotein -related                    |
| 971 | 261676_at   | 378  | 1.1 | 1.2 | 1.1 | 356  | 0.8 | 1.2 | 2.7 | AT1G18480 | calcineurin-like phosphoesterase family                                  |
| 972 | 247840_at   | 1883 | 1.1 | 1.3 | 1.2 | 1590 | 1.0 | 1.6 | 2.7 | AT5G58020 | expressed protein                                                        |
| 973 | 255647_at   | 342  | 1.1 | 1.3 | 0.9 | 392  | 0.9 | 1.2 | 2.7 | AT4G00900 | calcium-transporting ATPase 2, endoplasmic reticulum-type (calcium pump) |

|             |             |      |     |     |     |      |     |     |     |           |                                                          |
|-------------|-------------|------|-----|-----|-----|------|-----|-----|-----|-----------|----------------------------------------------------------|
| <b>974</b>  | 257635_at   | 331  | 0.6 | 1.1 | 1.0 | 100  | 1.9 | 3.0 | 2.7 | AT3G26280 | cytochrome P450 family                                   |
| <b>975</b>  | 257535_at   | 109  | 1.1 | 1.3 | 1.1 | 82   | 1.1 | 1.1 | 2.7 | AT3G09490 | chloroplast lumen common protein family                  |
| <b>976</b>  | 261179_at   | 830  | 1.1 | 1.2 | 1.3 | 494  | 1.2 | 1.6 | 2.7 | AT1G04985 | expressed protein                                        |
| <b>977</b>  | 246870_at   | 1319 | 1.6 | 3.3 | 3.2 | 1088 | 0.9 | 1.1 | 2.7 | AT5G26030 | ferrochelatase-I                                         |
| <b>978</b>  | 251927_at   | 3070 | 1.2 | 1.7 | 1.8 | 1757 | 0.9 | 1.4 | 2.7 | AT3G53990 | expressed protein                                        |
| <b>979</b>  | 255301_at   | 466  | 1.4 | 1.2 | 1.2 | 436  | 0.9 | 1.3 | 2.7 | AT4G04800 | expressed protein                                        |
| <b>980</b>  | 266284_at   | 158  | 1.1 | 1.1 | 0.8 | 139  | 1.2 | 1.9 | 2.7 | AT2G29190 | pumilio-family RNA-binding protein, putative             |
| <b>981</b>  | 249754_at   | 706  | 1.2 | 1.3 | 1.1 | 405  | 1.1 | 1.1 | 2.7 | AT5G24530 | oxidoreductase, 2OG-Fe(II) oxygenase family              |
| <b>982</b>  | 245905_at   | 1588 | 1.0 | 1.2 | 1.0 | 1349 | 1.0 | 1.1 | 2.7 | AT5G11090 | expressed protein                                        |
| <b>983</b>  | 267293_at   | 1283 | 1.1 | 3.7 | 4.0 | 1329 | 1.1 | 1.1 | 2.7 | AT2G23810 | senescence-associated protein family                     |
| <b>984</b>  | 258809_at   | 511  | 1.3 | 1.2 | 0.9 | 386  | 1.0 | 1.1 | 2.7 | AT3G04070 | No apical meristem (NAM) protein family                  |
| <b>985</b>  | 251206_at   | 152  | 1.2 | 0.9 | 1.1 | 191  | 0.7 | 1.5 | 2.7 | AT3G63090 | expressed protein                                        |
| <b>986</b>  | 253861_at   | 632  | 1.1 | 1.2 | 0.9 | 653  | 0.8 | 1.2 | 2.7 | AT4G27680 | expressed protein                                        |
| <b>987</b>  | 256999_at   | 1225 | 0.9 | 0.8 | 0.6 | 393  | 0.8 | 1.2 | 2.7 | AT3G14200 | DnaJ protein family                                      |
| <b>988</b>  | 254375_at   | 221  | 1.0 | 1.1 | 1.0 | 225  | 1.0 | 1.8 | 2.7 | AT4G21800 | protein (fragment) -related                              |
| <b>989</b>  | 265675_at   | 297  | 1.0 | 0.8 | 0.6 | 140  | 1.0 | 1.5 | 2.7 | AT2G32120 | heat shock protein hsp70t-2                              |
| <b>990</b>  | 258157_at   | 98   | 1.2 | 1.2 | 0.8 | 94   | 1.0 | 1.3 | 2.7 | AT3G18100 | myb family transcription factor (MYB4R1)                 |
| <b>991</b>  | 252388_at   | 159  | 1.2 | 1.0 | 0.8 | 111  | 1.2 | 1.6 | 2.7 | AT3G47850 | expressed protein                                        |
| <b>992</b>  | 257784_at   | 308  | 1.1 | 1.8 | 2.5 | 328  | 1.2 | 1.0 | 2.7 | AT3G26980 | ubiquitin family                                         |
| <b>993</b>  | 255602_at   | 451  | 1.1 | 1.2 | 1.3 | 291  | 1.0 | 1.5 | 2.7 | AT4G01026 | expressed protein                                        |
| <b>994</b>  | 265132_at   | 105  | 0.7 | 3.3 | 4.9 | 123  | 0.9 | 1.0 | 2.7 | AT1G23830 | expressed protein                                        |
| <b>995</b>  | 250087_at   | 103  | 0.9 | 0.8 | 0.9 | 119  | 0.7 | 2.4 | 2.7 | AT5G17270 | tetratricopeptide repeat (TPR)-containing protein        |
| <b>996</b>  | 252173_at   | 128  | 0.7 | 0.6 | 0.5 | 82   | 1.5 | 1.3 | 2.7 | AT3G50650 | scarecrow-like transcription factor 7 (SCL7)             |
| <b>997</b>  | 262953_at   | 302  | 1.2 | 1.4 | 1.1 | 290  | 1.0 | 1.4 | 2.7 | AT1G75670 | expressed protein                                        |
| <b>998</b>  | 247283_at   | 1083 | 1.6 | 2.1 | 1.6 | 988  | 1.0 | 1.1 | 2.7 | AT5G64250 | 2-nitropropane dioxygenase-related protein               |
| <b>999</b>  | 262635_at   | 1045 | 1.8 | 1.8 | 1.9 | 334  | 1.0 | 1.5 | 2.7 | AT1G06570 | 4-hydroxyphenylpyruvate dioxygenase (HPD)                |
| <b>1000</b> | 258915_at   | 318  | 1.0 | 1.9 | 2.3 | 277  | 1.0 | 1.0 | 2.7 | AT3G10640 | expressed protein                                        |
| <b>1001</b> | 256288_at   | 262  | 1.4 | 1.0 | 1.1 | 395  | 0.9 | 1.8 | 2.7 | AT3G12270 | protein arginine N-methyltransferase family              |
| <b>1002</b> | 262395_at   | 198  | 0.9 | 0.9 | 0.7 | 125  | 1.4 | 1.9 | 2.7 | AT1G49540 | transducin / WD-40 repeat protein family                 |
| <b>1003</b> | 266615_s_at | 506  | 1.5 | 1.8 | 1.9 | 381  | 1.1 | 1.2 | 2.7 | AT2G29720 | monooxygenase family                                     |
| <b>1004</b> | 256107_at   | 81   | 0.7 | 0.8 | 0.9 | 68   | 1.1 | 1.6 | 2.7 | AT1G16830 | pentatricopeptide (PPR) repeat-containing protein        |
| <b>1005</b> | 246989_at   | 111  | 1.3 | 1.6 | 1.3 | 131  | 1.3 | 1.0 | 2.7 | AT5G67350 | expressed protein                                        |
| <b>1006</b> | 247810_at   | 3225 | 1.0 | 0.9 | 1.0 | 2848 | 1.1 | 1.8 | 2.7 | AT5G58290 | 26S proteasome AAA-ATPase subunit RPT3                   |
| <b>1007</b> | 254144_at   | 2459 | 1.0 | 0.9 | 0.9 | 2306 | 1.0 | 1.7 | 2.7 | AT4G24690 | ubiquitin-associated (UBA)/PB1 domain-containing protein |
| <b>1008</b> | 257009_at   | 109  | 1.0 | 0.8 | 0.6 | 74   | 1.2 | 1.9 | 2.6 | AT3G14160 | oxidoreductase, 2OG-Fe(II) oxygenase family              |
| <b>1009</b> | 264452_at   | 333  | 1.3 | 1.0 | 0.9 | 335  | 0.8 | 1.3 | 2.6 | AT1G10270 | pentatricopeptide (PPR) repeat-containing protein        |
| <b>1010</b> | 265269_at   | 160  | 1.1 | 1.1 | 1.8 | 175  | 1.0 | 1.0 | 2.6 | AT2G42950 | expressed protein                                        |

|             |             |      |     |     |     |     |     |     |     |           |                                                       |
|-------------|-------------|------|-----|-----|-----|-----|-----|-----|-----|-----------|-------------------------------------------------------|
| <b>1011</b> | 250196_at   | 58   | 1.3 | 1.5 | 1.2 | 124 | 0.9 | 2.3 | 2.6 | AT5G14580 | polynucleotide phosphorylase                          |
| <b>1012</b> | 263251_at   | 950  | 1.0 | 1.0 | 0.7 | 744 | 1.0 | 1.5 | 2.6 | AT2G31410 | expressed protein                                     |
| <b>1013</b> | 248436_at   | 679  | 1.7 | 1.6 | 1.3 | 456 | 1.0 | 2.5 | 2.6 | AT5G51220 | expressed protein                                     |
| <b>1014</b> | 247046_at   | 324  | 1.2 | 0.9 | 0.7 | 324 | 0.8 | 1.5 | 2.6 | AT5G66540 | expressed protein                                     |
| <b>1015</b> | 247464_at   | 364  | 1.8 | 1.8 | 1.1 | 306 | 1.0 | 1.1 | 2.6 | AT5G62070 | expressed protein                                     |
| <b>1016</b> | 266514_at   | 964  | 1.6 | 2.1 | 1.7 | 680 | 1.1 | 1.2 | 2.6 | AT2G47890 | CONSTANS B-box zinc finger family protein             |
| <b>1017</b> | 249487_at   | 415  | 1.4 | 1.6 | 1.0 | 350 | 1.0 | 1.3 | 2.6 | AT5G39040 | ABC transporter family protein                        |
| <b>1018</b> | 265993_at   | 75   | 1.4 | 1.3 | 1.9 | 81  | 1.0 | 1.0 | 2.6 | AT2G24160 | leucine rich repeat protein family                    |
| <b>1019</b> | 254079_at   | 388  | 1.0 | 0.7 | 0.7 | 416 | 0.8 | 1.8 | 2.6 | AT4G25730 | expressed protein                                     |
| <b>1020</b> | 251279_at   | 239  | 1.3 | 1.0 | 1.2 | 170 | 1.0 | 1.2 | 2.6 | AT3G61800 | expressed protein                                     |
| <b>1021</b> | 251484_at   | 272  | 1.1 | 1.1 | 1.0 | 257 | 1.0 | 1.4 | 2.6 | AT3G59640 | glycine-rich protein                                  |
| <b>1022</b> | 245272_at   | 73   | 1.2 | 3.8 | 3.4 | 60  | 1.0 | 0.9 | 2.6 | AT4G17250 | expressed protein                                     |
| <b>1023</b> | 261064_at   | 697  | 2.0 | 1.8 | 1.3 | 578 | 1.0 | 1.5 | 2.6 | AT1G07510 | expressed protein                                     |
| <b>1024</b> | 260310_at   | 263  | 1.4 | 1.5 | 1.3 | 243 | 1.1 | 1.1 | 2.6 | AT1G70590 | F-box protein family                                  |
| <b>1025</b> | 267397_at   | 145  | 1.2 | 1.1 | 0.9 | 113 | 1.1 | 1.6 | 2.6 | AT1G76170 | hypothetical protein                                  |
| <b>1026</b> | 249550_at   | 146  | 1.1 | 2.1 | 2.2 | 116 | 1.1 | 1.0 | 2.6 | AT5G38210 | serine/threonine protein kinase family                |
| <b>1027</b> | 251346_at   | 1432 | 0.9 | 1.2 | 1.1 | 863 | 1.0 | 1.4 | 2.6 | AT3G60980 | pentatricopeptide (PPR) repeat-containing protein     |
| <b>1028</b> | 255594_at   | 841  | 1.8 | 2.0 | 1.3 | 524 | 1.0 | 1.5 | 2.6 | AT4G01660 | ABC transporter -related                              |
| <b>1029</b> | 264574_at   | 260  | 0.8 | 0.6 | 0.6 | 153 | 1.4 | 1.2 | 2.6 | AT1G05300 | metal transporter, putative (ZIP5)                    |
| <b>1030</b> | 265680_at   | 466  | 0.7 | 1.5 | 3.4 | 305 | 1.3 | 1.0 | 2.6 | AT2G32150 | haloacid dehalogenase-like hydrolase family           |
| <b>1031</b> | 252068_at   | 154  | 1.0 | 1.1 | 1.3 | 116 | 1.2 | 1.4 | 2.6 | AT3G51440 | strictosidine synthase-related                        |
| <b>1032</b> | 259224_at   | 508  | 1.6 | 2.1 | 1.5 | 598 | 1.0 | 1.8 | 2.6 | AT3G07800 | thymidine kinase -related                             |
| <b>1033</b> | 250275_at   | 560  | 1.1 | 1.0 | 0.7 | 486 | 1.2 | 1.8 | 2.6 | AT5G13030 | expressed protein                                     |
| <b>1034</b> | 260829_s_at | 1077 | 1.1 | 1.6 | 1.6 | 886 | 1.3 | 1.4 | 2.6 | AT1G06870 | chloroplast thylakoidal processing peptidase -related |
| <b>1035</b> | 261082_at   | 1140 | 1.3 | 1.2 | 1.1 | 947 | 0.9 | 1.5 | 2.6 | AT1G07360 | RRM-containing RNA-binding protein, putative          |
| <b>1036</b> | 252976_s_at | 815  | 1.5 | 2.0 | 2.0 | 638 | 0.9 | 1.2 | 2.6 | AT4G38550 | Phospholipase like protein                            |
| <b>1037</b> | 247571_at   | 1057 | 1.2 | 1.5 | 1.7 | 809 | 1.0 | 1.2 | 2.6 | AT5G61210 | syntaxin SNAP33                                       |
| <b>1038</b> | 259800_at   | 380  | 1.1 | 0.9 | 0.8 | 319 | 1.1 | 1.3 | 2.6 | AT1G72175 | C3HC4-type zinc finger protein family                 |
| <b>1039</b> | 252179_at   | 108  | 1.1 | 1.4 | 1.3 | 132 | 1.0 | 0.8 | 2.6 | AT3G50760 | glycosyltransferase family 8                          |
| <b>1040</b> | 254861_at   | 957  | 1.1 | 1.4 | 1.2 | 759 | 1.0 | 0.9 | 2.6 | AT4G12040 | expressed protein                                     |
| <b>1041</b> | 256958_at   | 214  | 1.1 | 1.8 | 1.8 | 196 | 1.1 | 1.1 | 2.6 | AT3G13430 | expressed protein                                     |
| <b>1042</b> | 253305_at   | 591  | 2.5 | 3.9 | 3.6 | 937 | 1.3 | 1.7 | 2.6 | AT4G33666 | expressed protein                                     |
| <b>1043</b> | 245770_at   | 248  | 1.2 | 1.0 | 0.8 | 217 | 0.8 | 1.6 | 2.6 | AT1G30240 | expressed protein                                     |
| <b>1044</b> | 263261_at   | 395  | 0.9 | 1.0 | 0.8 | 320 | 0.9 | 1.5 | 2.6 | AT1G10580 | transducin / WD-40 repeat protein family              |
| <b>1045</b> | 255595_at   | 377  | 1.3 | 1.6 | 1.4 | 473 | 1.0 | 1.2 | 2.6 | AT4G01700 | glycosyl hydrolase family 19 (chitinase)              |
| <b>1046</b> | 257628_at   | 637  | 0.8 | 0.7 | 0.8 | 182 | 1.2 | 2.8 | 2.6 | AT3G26290 | cytochrome p450 71B26                                 |
| <b>1047</b> | 255508_at   | 309  | 1.2 | 0.8 | 0.8 | 234 | 1.0 | 1.4 | 2.6 | AT4G02220 | zinc finger protein identical to T10M13.22 -related   |

|      |             |      |     |     |     |      |     |     |     |           |                                                            |
|------|-------------|------|-----|-----|-----|------|-----|-----|-----|-----------|------------------------------------------------------------|
| 1048 | 251563_at   | 282  | 1.4 | 1.2 | 1.0 | 235  | 0.9 | 1.2 | 2.6 | AT3G57880 | C2 domain-containing protein                               |
| 1049 | 245051_at   | 585  | 1.1 | 1.9 | 2.5 | 618  | 0.9 | 1.0 | 2.6 | AT2G23320 | WRKY family transcription factor                           |
| 1050 | 250738_at   | 931  | 1.0 | 1.2 | 1.3 | 883  | 1.0 | 1.0 | 2.6 | AT5G05730 | anthranilate synthase, alpha subunit, component I-1 (ASA1) |
| 1051 | 260824_at   | 267  | 1.0 | 0.9 | 0.7 | 330  | 1.1 | 1.8 | 2.6 | AT1G06720 | expressed protein                                          |
| 1052 | 259113_at   | 124  | 1.1 | 1.0 | 0.8 | 110  | 1.1 | 1.6 | 2.6 | AT3G05510 | phospholipid/glycerol acyltransferase family               |
| 1053 | 262107_at   | 287  | 1.2 | 1.9 | 1.6 | 291  | 1.0 | 1.3 | 2.6 | AT1G02750 | drought-induced protein -related                           |
| 1054 | 248815_at   | 384  | 1.1 | 1.0 | 0.8 | 259  | 1.0 | 1.7 | 2.6 | AT5G46920 | intron maturase, type II family                            |
| 1055 | 250096_at   | 2074 | 0.9 | 1.2 | 1.0 | 1473 | 1.0 | 1.6 | 2.6 | AT5G17190 | expressed protein                                          |
| 1056 | 262314_at   | 525  | 1.0 | 1.0 | 1.4 | 516  | 0.9 | 1.5 | 2.6 | AT1G70810 | C2 domain-containing protein                               |
| 1057 | 263476_at   | 146  | 1.2 | 1.5 | 1.7 | 152  | 1.2 | 1.1 | 2.6 | AT2G31870 | poly(ADP-ribose) glycohydrolase -related                   |
| 1058 | 259835_at   | 404  | 1.0 | 0.9 | 0.7 | 304  | 0.9 | 1.8 | 2.6 | AT1G52160 | hydrolase family                                           |
| 1059 | 249746_at   | 314  | 1.3 | 2.2 | 2.5 | 257  | 1.1 | 0.9 | 2.6 | AT5G24590 | No apical meristem (NAM) protein family                    |
| 1060 | 258259_s_at | 73   | 0.8 | 0.7 | 1.0 | 63   | 1.1 | 1.6 | 2.6 | AT3G26840 | esterase/lipase/thioesterase family                        |
| 1061 | 247384_at   | 1273 | 1.4 | 1.5 | 0.7 | 910  | 1.1 | 1.2 | 2.6 | AT5G63370 | protein kinase family                                      |
| 1062 | 258348_at   | 151  | 1.2 | 1.4 | 1.5 | 106  | 1.2 | 1.4 | 2.6 | AT3G17710 | F-box protein family                                       |
| 1063 | 254694_at   | 577  | 1.1 | 2.9 | 3.1 | 688  | 1.3 | 1.2 | 2.6 | AT4G17900 | expressed protein                                          |
| 1064 | 252474_at   | 534  | 1.3 | 3.3 | 3.1 | 427  | 0.8 | 1.0 | 2.6 | AT3G46620 | expressed protein                                          |
| 1065 | 260025_at   | 633  | 0.8 | 0.6 | 0.5 | 309  | 0.9 | 1.4 | 2.6 | AT1G30070 | expressed protein                                          |
| 1066 | 252475_s_at | 471  | 1.6 | 2.0 | 1.4 | 599  | 1.0 | 0.8 | 2.6 | AT3G46640 | myb family transcription factor                            |
| 1067 | 259841_at   | 2214 | 1.1 | 1.5 | 1.5 | 1344 | 1.1 | 1.0 | 2.6 | AT1G52200 | expressed protein                                          |
| 1068 | 253456_at   | 204  | 1.2 | 1.2 | 1.0 | 232  | 1.0 | 1.4 | 2.6 | AT4G32050 | expressed protein                                          |
| 1069 | 259272_at   | 2415 | 1.4 | 1.3 | 0.9 | 1296 | 1.0 | 1.0 | 2.6 | AT3G01290 | expressed protein                                          |
| 1070 | 263938_at   | 591  | 1.1 | 1.0 | 0.8 | 479  | 1.1 | 1.5 | 2.6 | AT2G35900 | expressed protein                                          |
| 1071 | 264089_at   | 1167 | 0.9 | 1.1 | 1.3 | 1020 | 1.0 | 1.1 | 2.6 | AT2G31200 | actin depolymerizing factor 6                              |
| 1072 | 249346_at   | 1734 | 0.9 | 0.9 | 0.7 | 1355 | 0.9 | 1.0 | 2.5 | AT5G40780 | lysine and histidine specific transporter, putative        |
| 1073 | 257085_at   | 292  | 1.1 | 1.0 | 0.7 | 257  | 1.1 | 1.7 | 2.5 | AT3G20630 | ubiquitin-specific protease 14 (UBP14), putative           |
| 1074 | 247585_at   | 296  | 0.9 | 1.2 | 1.7 | 262  | 1.2 | 2.6 | 2.5 | AT5G60680 | expressed protein                                          |
| 1075 | 252126_at   | 996  | 1.5 | 1.7 | 1.7 | 1146 | 1.0 | 1.1 | 2.5 | AT3G50950 | disease resistance protein (CC-NBS-LRR class), putative    |
| 1076 | 253975_at   | 165  | 1.0 | 0.8 | 0.9 | 166  | 0.8 | 2.0 | 2.5 | AT4G26600 | expressed protein                                          |
| 1077 | 265885_at   | 107  | 1.0 | 1.4 | 1.2 | 107  | 1.1 | 1.3 | 2.5 | AT2G42330 | hypothetical protein                                       |
| 1078 | 248248_at   | 345  | 1.1 | 1.0 | 1.0 | 471  | 1.2 | 1.4 | 2.5 | AT5G53120 | spermidine synthase                                        |
| 1079 | 254681_at   | 115  | 1.1 | 1.5 | 1.4 | 104  | 1.2 | 1.2 | 2.5 | AT4G18140 | expressed protein                                          |
| 1080 | 252379_at   | 869  | 1.1 | 1.0 | 1.0 | 741  | 0.9 | 1.3 | 2.5 | AT3G47730 | ABC transporter family protein                             |
| 1081 | 248451_at   | 349  | 1.2 | 1.1 | 1.0 | 308  | 1.1 | 1.3 | 2.5 | AT5G51180 | expressed protein                                          |
| 1082 | 253755_at   | 1686 | 1.1 | 1.0 | 0.9 | 1679 | 1.1 | 1.9 | 2.5 | AT4G29040 | 26S proteasome AAA-ATPase subunit RPT2a                    |
| 1083 | 250445_at   | 84   | 2.0 | 1.1 | 1.1 | 194  | 0.9 | 1.0 | 2.5 | AT5G10760 | nucleoid DNA-binding protein cnd41 - like protein          |
| 1084 | 252045_at   | 221  | 1.7 | 2.9 | 2.5 | 178  | 1.1 | 1.1 | 2.5 | AT3G52450 | expressed protein                                          |

|             |             |      |     |     |     |      |     |     |     |           |                                                                     |
|-------------|-------------|------|-----|-----|-----|------|-----|-----|-----|-----------|---------------------------------------------------------------------|
| <b>1085</b> | 259610_at   | 437  | 1.0 | 0.8 | 0.8 | 336  | 1.3 | 1.3 | 2.5 | AT1G52320 | bZIP protein -related                                               |
| <b>1086</b> | 254593_s_at | 313  | 1.1 | 0.7 | 0.8 | 256  | 1.1 | 2.2 | 2.5 | AT4G18900 | transducin / WD-40 repeat protein family                            |
| <b>1087</b> | 264402_at   | 303  | 0.9 | 0.8 | 0.7 | 174  | 1.1 | 1.5 | 2.5 | AT2G25140 | HSP100/ClpB, putative                                               |
| <b>1088</b> | 253695_at   | 1031 | 1.1 | 0.9 | 0.8 | 872  | 0.8 | 1.7 | 2.5 | AT4G29510 | protein arginine N-methyltransferase, putative                      |
| <b>1089</b> | 245437_at   | 90   | 1.1 | 1.2 | 0.8 | 103  | 1.0 | 2.3 | 2.5 | AT4G16630 | DEAD/DEAH box helicase, putative                                    |
| <b>1090</b> | 262626_at   | 2275 | 2.9 | 2.1 | 1.1 | 909  | 1.1 | 2.3 | 2.5 | AT1G06430 | FtsH protease, putative                                             |
| <b>1091</b> | 254422_at   | 430  | 1.0 | 1.3 | 1.6 | 357  | 1.0 | 1.0 | 2.5 | AT4G21560 | expressed protein                                                   |
| <b>1092</b> | 262803_at   | 525  | 1.5 | 1.9 | 1.6 | 652  | 1.1 | 1.7 | 2.5 | AT1G21000 | expressed protein                                                   |
| <b>1093</b> | 250301_at   | 296  | 1.5 | 2.2 | 1.9 | 325  | 1.1 | 0.8 | 2.5 | AT5G11970 | expressed protein                                                   |
| <b>1094</b> | 254613_at   | 195  | 1.2 | 1.0 | 1.1 | 177  | 1.0 | 1.5 | 2.5 | AT4G19150 | ankyrin-related protein                                             |
| <b>1095</b> | 246600_at   | 111  | 1.6 | 2.1 | 2.7 | 140  | 0.9 | 1.2 | 2.5 | AT5G14930 | leaf senescence-associated protein (SAG101)                         |
| <b>1096</b> | 248347_at   | 275  | 6.5 | 9.3 | 4.6 | 118  | 1.0 | 1.4 | 2.5 | AT5G52250 | transducin / WD-40 repeat protein family                            |
| <b>1097</b> | 254262_at   | 2104 | 1.1 | 1.2 | 1.2 | 1827 | 1.0 | 1.1 | 2.5 | AT4G23470 | proline-rich protein family                                         |
| <b>1098</b> | 254874_at   | 1967 | 2.1 | 2.0 | 1.7 | 929  | 1.2 | 1.6 | 2.5 | AT4G11570 | haloacid dehalogenase-like hydrolase family                         |
| <b>1099</b> | 245374_at   | 687  | 1.1 | 1.2 | 1.2 | 625  | 1.0 | 1.5 | 2.5 | AT4G17620 | glycine-rich protein                                                |
| <b>1100</b> | 247302_at   | 394  | 1.0 | 1.4 | 1.2 | 338  | 1.1 | 1.2 | 2.5 | AT5G63880 | expressed protein                                                   |
| <b>1101</b> | 267454_at   | 675  | 1.1 | 1.2 | 0.9 | 607  | 0.9 | 1.3 | 2.5 | AT2G33730 | DEAD box RNA helicase, putative                                     |
| <b>1102</b> | 254818_at   | 8571 | 1.1 | 1.0 | 1.1 | 3350 | 1.0 | 2.2 | 2.5 | AT4G12470 | protease inhibitor/seed storage/lipid transfer protein (LTP) family |
| <b>1103</b> | 248207_at   | 1185 | 3.4 | 2.6 | 1.4 | 360  | 1.0 | 1.8 | 2.5 | AT5G53970 | aminotransferase, putative                                          |
| <b>1104</b> | 250365_at   | 74   | 1.4 | 1.4 | 1.2 | 49   | 0.6 | 1.4 | 2.5 | AT5G11410 | protein kinase family                                               |
| <b>1105</b> | 264843_at   | 324  | 1.2 | 1.3 | 1.7 | 199  | 1.1 | 1.0 | 2.5 | AT1G03400 | 2-oxoglutarate-dependent dioxygenase, putative                      |
| <b>1106</b> | 249400_at   | 758  | 0.8 | 0.9 | 0.9 | 515  | 1.1 | 1.6 | 2.5 | AT5G40300 | expressed protein                                                   |
| <b>1107</b> | 260176_at   | 1496 | 1.0 | 1.3 | 1.6 | 1149 | 1.0 | 1.5 | 2.5 | AT1G71950 | expressed protein                                                   |
| <b>1108</b> | 246987_at   | 1101 | 2.0 | 2.0 | 1.4 | 905  | 1.1 | 1.4 | 2.5 | AT5G67300 | myb family transcription factor                                     |
| <b>1109</b> | 261858_at   | 451  | 0.9 | 1.0 | 0.9 | 377  | 1.1 | 1.4 | 2.5 | AT1G50570 | C2 domain-containing protein                                        |
| <b>1110</b> | 257444_at   | 282  | 0.9 | 0.9 | 0.8 | 194  | 1.1 | 1.2 | 2.5 | AT2G12550 | hypothetical protein                                                |
| <b>1111</b> | 266871_at   | 312  | 1.0 | 1.0 | 1.0 | 325  | 1.0 | 1.3 | 2.5 | AT2G44710 | RRM-containing protein                                              |
| <b>1112</b> | 266247_at   | 214  | 1.8 | 1.9 | 1.6 | 159  | 1.0 | 0.9 | 2.5 | AT2G27660 | expressed protein                                                   |
| <b>1113</b> | 263582_at   | 833  | 1.1 | 1.4 | 1.5 | 1008 | 0.9 | 1.2 | 2.5 | AT2G17120 | delta-8 sphingolipid desaturase                                     |
| <b>1114</b> | 261844_at   | 170  | 1.1 | 1.0 | 1.0 | 184  | 0.9 | 1.6 | 2.5 | AT1G15940 | expressed protein                                                   |
| <b>1115</b> | 246846_at   | 787  | 1.0 | 1.3 | 1.1 | 856  | 1.0 | 1.4 | 2.5 | AT5G26760 | expressed protein                                                   |
| <b>1116</b> | 246270_at   | 909  | 0.9 | 3.9 | 5.8 | 1082 | 1.0 | 0.9 | 2.5 | AT4G36500 | expressed protein                                                   |
| <b>1117</b> | 259764_at   | 835  | 1.5 | 1.5 | 1.7 | 621  | 1.0 | 1.1 | 2.5 | AT1G64280 | transcription factor inhibitor I kappa B -related                   |
| <b>1118</b> | 255278_at   | 202  | 1.2 | 1.0 | 0.9 | 270  | 0.8 | 2.1 | 2.5 | AT4G04940 | transducin / WD-40 repeat protein family                            |
| <b>1119</b> | 262507_at   | 148  | 1.2 | 1.6 | 1.4 | 124  | 1.1 | 1.1 | 2.5 | AT1G11330 | receptor-related protein kinase                                     |
| <b>1120</b> | 248136_at   | 303  | 1.2 | 1.0 | 0.6 | 261  | 0.9 | 1.4 | 2.5 | AT5G54910 | DEAD/DEAH box helicase, putative                                    |
| <b>1121</b> | 259908_at   | 334  | 1.2 | 1.1 | 0.8 | 374  | 0.9 | 1.6 | 2.5 | AT1G60850 | RNA polymerase subunit                                              |

|             |             |      |     |     |     |      |     |     |     |           |                                                           |
|-------------|-------------|------|-----|-----|-----|------|-----|-----|-----|-----------|-----------------------------------------------------------|
| <b>1122</b> | 263923_at   | 187  | 1.2 | 1.3 | 1.3 | 191  | 1.0 | 1.1 | 2.5 | AT2G36485 | expressed protein                                         |
| <b>1123</b> | 260803_at   | 587  | 1.8 | 2.3 | 1.0 | 589  | 1.0 | 1.2 | 2.5 | AT1G78340 | glutathione transferase, putative                         |
| <b>1124</b> | 259672_at   | 223  | 1.2 | 0.8 | 0.8 | 262  | 0.9 | 1.9 | 2.5 | AT1G68990 | DNA-directed RNA polymerase                               |
| <b>1125</b> | 248537_at   | 736  | 2.2 | 1.8 | 1.3 | 288  | 1.2 | 1.9 | 2.5 | AT5G50100 | expressed protein                                         |
| <b>1126</b> | 253808_at   | 558  | 1.3 | 1.0 | 1.1 | 484  | 1.1 | 1.1 | 2.5 | AT4G28300 | proline-rich protein family                               |
| <b>1127</b> | 251494_at   | 705  | 1.0 | 1.3 | 1.2 | 476  | 1.1 | 1.2 | 2.5 | AT3G59350 | serine/threonine protein kinase, putative                 |
| <b>1128</b> | 263320_at   | 854  | 0.7 | 0.6 | 0.5 | 106  | 1.0 | 1.2 | 2.5 | AT2G47180 | galactinol synthase, putative                             |
| <b>1129</b> | 259075_at   | 169  | 1.0 | 0.9 | 0.7 | 155  | 1.0 | 1.8 | 2.5 | AT3G02320 | N2,N2-dimethylguanosine tRNA methyltransferase -related   |
| <b>1130</b> | 248901_at   | 268  | 0.8 | 1.4 | 1.4 | 258  | 1.2 | 1.2 | 2.5 | AT5G46410 | expressed protein                                         |
| <b>1131</b> | 263844_at   | 1127 | 1.1 | 1.1 | 1.1 | 1232 | 0.8 | 1.5 | 2.5 | AT2G36930 | expressed protein                                         |
| <b>1132</b> | 260473_at   | 48   | 4.7 | 5.0 | 1.4 | 47   | 1.0 | 1.3 | 2.5 | AT1G10880 | expressed protein                                         |
| <b>1133</b> | 258789_at   | 290  | 1.0 | 1.1 | 1.0 | 219  | 1.0 | 1.4 | 2.5 | AT3G04605 | Mutator-related transposase                               |
| <b>1134</b> | 257624_at   | 56   | 1.1 | 1.9 | 3.9 | 88   | 0.9 | 0.8 | 2.5 | AT3G26220 | cytochrome P450 family                                    |
| <b>1135</b> | 254273_at   | 605  | 0.9 | 0.9 | 0.8 | 437  | 1.0 | 1.7 | 2.5 | AT4G22720 | glyco protein endopeptidase - like protein                |
| <b>1136</b> | 250990_at   | 492  | 1.0 | 2.6 | 2.8 | 427  | 1.1 | 1.1 | 2.5 | AT5G02290 | protein kinase, putative                                  |
| <b>1137</b> | 258946_at   | 519  | 1.5 | 1.2 | 0.7 | 444  | 0.9 | 1.6 | 2.5 | AT3G10650 | expressed protein                                         |
| <b>1138</b> | 261808_at   | 289  | 1.1 | 1.0 | 1.1 | 252  | 1.0 | 1.4 | 2.5 | AT1G30480 | DNA damage repair protein -related                        |
| <b>1139</b> | 258984_at   | 244  | 1.2 | 0.6 | 0.7 | 181  | 1.0 | 1.2 | 2.5 | AT3G08970 | DnaJ protein family                                       |
| <b>1140</b> | 250004_at   | 206  | 1.1 | 0.7 | 0.9 | 184  | 0.9 | 1.0 | 2.5 | AT5G18750 | DnaJ domain-containing protein                            |
| <b>1141</b> | 260223_at   | 147  | 1.4 | 1.1 | 1.1 | 116  | 1.0 | 1.6 | 2.5 | AT1G74390 | exonuclease protein family                                |
| <b>1142</b> | 252946_at   | 207  | 1.0 | 1.1 | 1.2 | 140  | 1.2 | 2.0 | 2.5 | AT4G39235 | expressed protein                                         |
| <b>1143</b> | 267523_at   | 1603 | 1.0 | 1.2 | 1.6 | 599  | 1.4 | 2.1 | 2.5 | AT2G30600 | POZ domain protein family                                 |
| <b>1144</b> | 253950_at   | 1667 | 1.0 | 1.0 | 0.9 | 1678 | 0.9 | 1.3 | 2.5 | AT4G26910 | dihydrolipoamide succinyltransferase -related             |
| <b>1145</b> | 264221_s_at | 429  | 1.0 | 1.1 | 1.2 | 320  | 1.1 | 1.5 | 2.5 | AT1G60170 | expressed protein                                         |
| <b>1146</b> | 262340_at   | 693  | 1.0 | 1.3 | 1.3 | 614  | 1.1 | 1.3 | 2.5 | AT1G64105 | No apical meristem (NAM) protein family                   |
| <b>1147</b> | 255569_at   | 1263 | 1.0 | 0.9 | 0.9 | 1283 | 1.0 | 1.6 | 2.5 | AT4G01320 | CAAX prenyl protease -related                             |
| <b>1148</b> | 247277_at   | 687  | 1.1 | 0.8 | 0.6 | 523  | 1.1 | 1.9 | 2.5 | AT5G64420 | expressed protein                                         |
| <b>1149</b> | 251622_at   | 565  | 1.1 | 1.3 | 1.4 | 438  | 1.3 | 1.2 | 2.5 | AT3G57340 | DnaJ protein family                                       |
| <b>1150</b> | 261625_at   | 434  | 0.9 | 0.8 | 0.8 | 241  | 1.2 | 1.9 | 2.4 | AT1G01930 | expressed protein                                         |
| <b>1151</b> | 248607_at   | 5116 | 1.5 | 1.8 | 1.7 | 2972 | 1.0 | 1.5 | 2.4 | AT5G49480 | sodium-inducible calcium-binding protein                  |
| <b>1152</b> | 253133_at   | 927  | 1.1 | 1.0 | 0.8 | 859  | 1.1 | 1.6 | 2.4 | AT4G35800 | DNA-directed RNA polymerase (EC 2.7.7.6) II largest chain |
| <b>1153</b> | 250350_at   | 1196 | 2.2 | 2.0 | 0.9 | 613  | 0.9 | 1.0 | 2.4 | AT5G12010 | expressed protein                                         |
| <b>1154</b> | 256829_at   | 673  | 1.1 | 1.2 | 1.0 | 667  | 1.2 | 1.4 | 2.4 | AT3G22850 | expressed protein                                         |
| <b>1155</b> | 266511_at   | 104  | 1.2 | 1.5 | 1.5 | 180  | 0.9 | 1.7 | 2.4 | AT2G47680 | helicase conserved C-terminal domain-containing protein   |
| <b>1156</b> | 249622_at   | 159  | 2.2 | 3.3 | 2.8 | 114  | 1.9 | 1.7 | 2.4 | AT5G37550 | expressed protein                                         |
| <b>1157</b> | 266037_at   | 431  | 0.9 | 2.0 | 2.0 | 490  | 0.9 | 1.1 | 2.4 | AT2G05940 | protein kinase, putative                                  |
| <b>1158</b> | 260005_at   | 90   | 1.2 | 1.7 | 3.6 | 132  | 0.7 | 0.5 | 2.4 | AT1G67920 | expressed protein                                         |



|             |             |      |     |      |      |      |     |     |     |           |                                                                                                       |
|-------------|-------------|------|-----|------|------|------|-----|-----|-----|-----------|-------------------------------------------------------------------------------------------------------|
| <b>1159</b> | 252305_at   | 267  | 0.8 | 0.7  | 0.6  | 163  | 1.0 | 1.7 | 2.4 | AT3G49240 | pentatricopeptide (PPR) repeat-containing protein                                                     |
| <b>1160</b> | 248932_at   | 125  | 1.0 | 0.9  | 1.2  | 133  | 1.2 | 1.1 | 2.4 | AT5G46050 | peptide transporter                                                                                   |
| <b>1161</b> | 257670_at   | 153  | 1.1 | 0.9  | 0.6  | 102  | 1.0 | 2.0 | 2.4 | AT3G20340 | expressed protein                                                                                     |
| <b>1162</b> | 264362_at   | 225  | 1.2 | 1.1  | 1.1  | 244  | 1.2 | 1.3 | 2.4 | AT1G03290 | expressed protein                                                                                     |
| <b>1163</b> | 249928_at   | 114  | 0.8 | 4.6  | 8.6  | 160  | 0.8 | 0.7 | 2.4 | AT5G22250 | CCR4-associated factor-related protein                                                                |
| <b>1164</b> | 258493_at   | 259  | 1.0 | 1.0  | 0.8  | 170  | 1.3 | 1.2 | 2.4 | AT3G02555 | expressed protein                                                                                     |
| <b>1165</b> | 264716_at   | 109  | 1.9 | 1.8  | 2.2  | 113  | 0.8 | 0.6 | 2.4 | AT1G70170 | matrix metallo proteinase -related                                                                    |
| <b>1166</b> | 252310_at   | 293  | 1.0 | 1.6  | 1.6  | 241  | 1.1 | 1.3 | 2.4 | AT3G49350 | GTPase activating -related protein                                                                    |
| <b>1167</b> | 252331_s_at | 208  | 1.0 | 1.4  | 1.7  | 157  | 1.1 | 1.2 | 2.4 | AT3G48790 | serine C-palmitoyltransferase, putative                                                               |
| <b>1168</b> | 246215_at   | 277  | 1.4 | 1.4  | 1.7  | 190  | 1.0 | 1.7 | 2.4 | AT4G37180 | cytoskeletal protein -related                                                                         |
| <b>1169</b> | 251848_at   | 614  | 1.1 | 1.4  | 1.1  | 511  | 1.0 | 1.1 | 2.4 | AT3G54620 | bZIP transcription factor-related protein                                                             |
| <b>1170</b> | 246750_at   | 141  | 1.1 | 1.4  | 1.6  | 162  | 1.1 | 1.4 | 2.4 | AT5G27860 | hypothetical protein                                                                                  |
| <b>1171</b> | 265206_at   | 170  | 1.1 | 1.1  | 1.2  | 110  | 1.2 | 1.5 | 2.4 | AT2G36670 | protease -related                                                                                     |
| <b>1172</b> | 252952_at   | 1542 | 1.1 | 0.9  | 0.6  | 951  | 0.8 | 1.3 | 2.4 | AT4G38710 | glycine-rich protein                                                                                  |
| <b>1173</b> | 261951_at   | 130  | 1.4 | 1.5  | 1.8  | 99   | 1.1 | 1.5 | 2.4 | AT1G64490 | expressed protein                                                                                     |
| <b>1174</b> | 255553_at   | 446  | 0.9 | 1.1  | 1.0  | 476  | 1.0 | 1.0 | 2.4 | AT4G01960 | PITSLRE protein kinase family                                                                         |
| <b>1175</b> | 247677_at   | 1695 | 1.0 | 1.1  | 0.9  | 1181 | 1.0 | 1.4 | 2.4 | AT5G59420 | oxysterol-binding protein - like                                                                      |
| <b>1176</b> | 257751_at   | 127  | 1.1 | 4.6  | 7.9  | 214  | 0.8 | 0.6 | 2.4 | AT3G18690 | expressed protein                                                                                     |
| <b>1177</b> | 264202_at   | 33   | 1.3 | 14.4 | 23.5 | 88   | 0.4 | 0.5 | 2.4 | AT1G22810 | AP2 domain transcription factor TINY, putative                                                        |
| <b>1178</b> | 255067_at   | 498  | 1.0 | 1.2  | 1.0  | 418  | 1.1 | 1.4 | 2.4 | AT4G08960 | phosphotyrosyl phosphatase activator protein -related                                                 |
| <b>1179</b> | 260747_at   | 634  | 1.2 | 1.2  | 1.1  | 559  | 1.0 | 1.3 | 2.4 | AT1G78420 | expressed protein                                                                                     |
| <b>1180</b> | 263800_at   | 85   | 1.3 | 7.4  | 10.2 | 107  | 1.0 | 1.4 | 2.4 | AT2G24600 | expressed protein                                                                                     |
| <b>1181</b> | 249161_at   | 1194 | 0.9 | 1.0  | 1.0  | 1154 | 1.1 | 1.8 | 2.4 | AT5G42790 | 20S proteasome alpha subunit F1 (PAF1)                                                                |
| <b>1182</b> | 247449_at   | 462  | 1.0 | 1.0  | 1.1  | 476  | 1.0 | 1.8 | 2.4 | AT5G62290 | expressed protein                                                                                     |
| <b>1183</b> | 266567_at   | 712  | 1.2 | 0.9  | 0.7  | 552  | 0.9 | 1.6 | 2.4 | AT2G24050 | eukaryotic initiation factor 4 (eIF4), putative                                                       |
| <b>1184</b> | 263150_at   | 888  | 0.5 | 0.2  | 0.4  | 112  | 0.8 | 1.0 | 2.4 | AT1G54050 | heat shock hsp20 protein family                                                                       |
| <b>1185</b> | 261651_at   | 624  | 1.6 | 1.5  | 1.0  | 723  | 1.0 | 1.3 | 2.4 | AT1G27760 | expressed protein                                                                                     |
| <b>1186</b> | 245251_at   | 255  | 0.8 | 1.3  | 2.1  | 244  | 1.1 | 1.2 | 2.4 | AT4G17615 | calcineurin B-like protein 1 (CBL1)                                                                   |
| <b>1187</b> | 262678_at   | 604  | 1.7 | 2.4  | 1.8  | 485  | 1.1 | 1.2 | 2.4 | AT1G75810 | expressed protein                                                                                     |
| <b>1188</b> | 245359_at   | 532  | 1.0 | 1.0  | 1.4  | 587  | 1.1 | 1.3 | 2.4 | AT4G14430 | enoyl-CoA hydratase/isomerase family                                                                  |
| <b>1189</b> | 253702_at   | 1176 | 1.0 | 1.1  | 1.0  | 894  | 0.9 | 1.2 | 2.4 | AT4G29900 | potential calcium-transporting ATPase 10, plasma membrane-type (Ca <sup>2+</sup> -ATPase, isoform 10) |
| <b>1190</b> | 260532_at   | 596  | 1.0 | 1.0  | 0.9  | 478  | 1.0 | 1.3 | 2.4 | AT2G47330 | DEAD/DEAH box helicase, putative                                                                      |
| <b>1191</b> | 262943_at   | 350  | 1.1 | 0.7  | 0.6  | 256  | 0.9 | 2.1 | 2.4 | AT1G79470 | inosine-5'-monophosphate dehydrogenase                                                                |
| <b>1192</b> | 245512_at   | 1186 | 1.0 | 1.0  | 1.1  | 1447 | 0.8 | 1.6 | 2.4 | AT4G15770 | expressed protein                                                                                     |
| <b>1193</b> | 262500_at   | 679  | 1.0 | 1.1  | 1.2  | 644  | 1.1 | 1.3 | 2.4 | AT1G21760 | F-box protein family                                                                                  |
| <b>1194</b> | 254478_at   | 604  | 0.9 | 1.0  | 1.2  | 408  | 1.2 | 1.9 | 2.4 | AT4G20330 | expressed protein                                                                                     |
| <b>1195</b> | 249078_at   | 934  | 1.5 | 2.5  | 2.4  | 1040 | 1.0 | 1.1 | 2.4 | AT5G44070 | phytochelatin synthase (gb AAD41794.1)                                                                |

|             |             |      |     |     |     |      |     |     |     |           |                                                                                           |
|-------------|-------------|------|-----|-----|-----|------|-----|-----|-----|-----------|-------------------------------------------------------------------------------------------|
| <b>1196</b> | 253712_at   | 803  | 0.8 | 0.8 | 0.6 | 608  | 1.0 | 1.3 | 2.4 | AT4G29330 | expressed protein                                                                         |
| <b>1197</b> | 245543_at   | 172  | 1.0 | 1.1 | 1.5 | 94   | 0.9 | 1.0 | 2.4 | AT4G15260 | UDP-glycosyltransferase family                                                            |
| <b>1198</b> | 259364_at   | 108  | 1.6 | 2.4 | 3.3 | 97   | 1.1 | 1.4 | 2.4 | AT1G13260 | AP2 domain transcription factor, putative (RAV1)                                          |
| <b>1199</b> | 265446_at   | 1655 | 1.1 | 1.4 | 1.7 | 1740 | 1.0 | 1.3 | 2.4 | AT2G37110 | expressed protein                                                                         |
| <b>1200</b> | 248743_at   | 248  | 1.3 | 1.1 | 1.1 | 232  | 0.8 | 1.4 | 2.4 | AT5G48240 | hypothetical protein                                                                      |
| <b>1201</b> | 247429_at   | 153  | 1.0 | 1.4 | 1.1 | 217  | 0.9 | 1.0 | 2.4 | AT5G62620 | galactosyltransferase family                                                              |
| <b>1202</b> | 245951_at   | 1714 | 1.0 | 0.8 | 0.7 | 1714 | 1.0 | 1.7 | 2.4 | AT5G19550 | aspartate aminotransferase, cytoplasmic isozyme 1 (transaminase A/Asp2)                   |
| <b>1203</b> | 255838_at   | 211  | 1.4 | 1.1 | 0.6 | 214  | 1.1 | 1.3 | 2.4 | AT2G33490 | expressed protein                                                                         |
| <b>1204</b> | 249174_at   | 284  | 0.9 | 0.9 | 0.7 | 621  | 1.2 | 1.3 | 2.4 | AT5G42900 | expressed protein                                                                         |
| <b>1205</b> | 261445_at   | 814  | 1.1 | 2.0 | 2.1 | 617  | 1.1 | 1.0 | 2.4 | AT1G28380 | expressed protein                                                                         |
| <b>1206</b> | 253129_at   | 1273 | 1.0 | 1.0 | 1.0 | 1017 | 1.0 | 1.5 | 2.4 | AT4G36020 | glycine-rich protein                                                                      |
| <b>1207</b> | 250049_at   | 492  | 2.6 | 2.4 | 1.3 | 193  | 0.9 | 1.7 | 2.4 | AT5G17780 | hydrolase, alpha/beta fold family                                                         |
| <b>1208</b> | 250711_at   | 1012 | 1.1 | 0.9 | 0.6 | 748  | 0.7 | 1.2 | 2.4 | AT5G06110 | cell division protein - related                                                           |
| <b>1209</b> | 254103_at   | 2012 | 1.2 | 1.4 | 1.5 | 1525 | 1.0 | 1.4 | 2.4 | AT4G25030 | expressed protein                                                                         |
| <b>1210</b> | 264522_at   | 143  | 1.1 | 1.2 | 1.2 | 139  | 0.9 | 1.5 | 2.4 | AT1G10050 | glycosyl hydrolase family 10                                                              |
| <b>1211</b> | 264094_at   | 324  | 0.7 | 0.7 | 0.7 | 213  | 1.0 | 1.7 | 2.4 | AT1G79200 | expressed protein                                                                         |
| <b>1212</b> | 253063_at   | 550  | 1.1 | 1.2 | 1.0 | 505  | 1.0 | 1.1 | 2.4 | AT4G37640 | calcium-transporting ATPase 2, plasma membrane-type (Ca <sup>2+</sup> -ATPase, isoform 2) |
| <b>1213</b> | 250276_at   | 811  | 1.0 | 1.0 | 1.0 | 796  | 1.1 | 1.5 | 2.4 | AT5G13030 | expressed protein                                                                         |
| <b>1214</b> | 258794_at   | 361  | 1.0 | 1.0 | 0.7 | 321  | 0.9 | 1.4 | 2.4 | AT3G04710 | ankyrin-related protein                                                                   |
| <b>1215</b> | 246193_at   | 251  | 1.2 | 1.2 | 1.3 | 213  | 1.1 | 1.5 | 2.4 | AT5G20880 | expressed protein                                                                         |
| <b>1216</b> | 246514_at   | 176  | 1.0 | 1.2 | 0.7 | 152  | 0.6 | 1.6 | 2.4 | AT5G15700 | DNA-directed RNA polymerase (mitochondrial)                                               |
| <b>1217</b> | 255555_at   | 666  | 1.0 | 0.7 | 0.8 | 521  | 1.1 | 1.7 | 2.4 | AT4G01810 | protein transport protein-related                                                         |
| <b>1218</b> | 262832_s_at | 2755 | 1.5 | 1.9 | 2.1 | 2304 | 1.0 | 0.9 | 2.4 | AT1G14870 | expressed protein                                                                         |
| <b>1219</b> | 264458_at   | 800  | 0.9 | 0.9 | 0.7 | 581  | 1.1 | 1.2 | 2.4 | AT1G10410 | expressed protein                                                                         |
| <b>1220</b> | 266958_at   | 903  | 1.3 | 1.4 | 1.1 | 754  | 1.1 | 1.6 | 2.4 | AT2G34630 | geranyl diphosphate synthase (GPPS)(dimethylallyltransferase)                             |
| <b>1221</b> | 262251_at   | 443  | 1.1 | 1.4 | 1.2 | 404  | 1.0 | 1.4 | 2.4 | AT1G53760 | hypothetical protein                                                                      |
| <b>1222</b> | 260868_at   | 695  | 1.1 | 0.9 | 0.9 | 628  | 0.9 | 1.4 | 2.4 | AT1G43860 | expressed protein                                                                         |
| <b>1223</b> | 246775_at   | 884  | 1.1 | 0.9 | 1.0 | 782  | 1.0 | 1.6 | 2.4 | AT5G27540 | GTP-binding protein - related                                                             |
| <b>1224</b> | 254249_at   | 70   | 1.5 | 2.2 | 1.8 | 148  | 0.7 | 0.6 | 2.4 | AT4G23280 | receptor-like protein kinase, putative                                                    |
| <b>1225</b> | 250911_at   | 559  | 1.1 | 1.0 | 1.2 | 348  | 1.1 | 1.4 | 2.4 | AT5G03730 | SERINE/THREONINE-PROTEIN KINASE CTR1                                                      |
| <b>1226</b> | 263811_at   | 745  | 1.0 | 1.1 | 1.1 | 615  | 1.1 | 1.6 | 2.4 | AT2G04350 | long-chain-fatty-acid--CoA ligase (acyl-CoA synthetase) family                            |
| <b>1227</b> | 267134_at   | 497  | 1.1 | 1.4 | 1.2 | 378  | 0.9 | 0.9 | 2.4 | AT2G23450 | protein kinase family                                                                     |
| <b>1228</b> | 250097_at   | 787  | 1.1 | 1.4 | 1.5 | 698  | 1.1 | 1.4 | 2.4 | AT5G17280 | expressed protein                                                                         |
| <b>1229</b> | 256616_at   | 120  | 1.3 | 1.4 | 1.2 | 102  | 0.8 | 0.8 | 2.4 | AT3G22260 | expressed protein                                                                         |

|             |             |      |     |     |     |      |     |     |     |           |                                                                  |
|-------------|-------------|------|-----|-----|-----|------|-----|-----|-----|-----------|------------------------------------------------------------------|
| <b>1230</b> | 265907_at   | 94   | 0.9 | 0.6 | 0.9 | 63   | 1.0 | 1.5 | 2.4 | AT2G25650 | expressed protein                                                |
| <b>1231</b> | 263472_at   | 546  | 1.3 | 1.5 | 1.4 | 457  | 1.2 | 1.4 | 2.4 | AT2G31955 | molybdopterin biosynthesis CNX2 protein, putative                |
| <b>1232</b> | 259980_at   | 1980 | 0.9 | 1.0 | 1.0 | 1292 | 0.9 | 1.6 | 2.4 | AT1G76520 | auxin efflux carrier protein family                              |
| <b>1233</b> | 259415_at   | 259  | 1.4 | 1.3 | 1.1 | 220  | 0.9 | 1.3 | 2.4 | AT1G02330 | expressed protein                                                |
| <b>1234</b> | 253350_at   | 176  | 0.8 | 1.0 | 0.8 | 103  | 1.4 | 1.5 | 2.4 | AT4G33690 | hypothetical protein                                             |
| <b>1235</b> | 258879_at   | 890  | 1.2 | 1.1 | 1.0 | 792  | 1.0 | 1.7 | 2.4 | AT3G03270 | expressed protein                                                |
| <b>1236</b> | 259977_at   | 227  | 2.1 | 3.2 | 1.8 | 301  | 1.0 | 1.4 | 2.4 | AT1G76590 | expressed protein                                                |
| <b>1237</b> | 246980_at   | 394  | 1.0 | 0.9 | 1.1 | 300  | 1.2 | 1.4 | 2.4 | AT5G67530 | peptidylprolyl isomerase (cyclophilin)-related                   |
| <b>1238</b> | 247721_at   | 946  | 1.0 | 1.0 | 1.0 | 825  | 1.0 | 1.6 | 2.4 | AT5G59140 | SKP1 family                                                      |
| <b>1239</b> | 257610_at   | 103  | 0.8 | 1.2 | 0.6 | 114  | 1.5 | 1.8 | 2.4 | AT3G13810 | zinc finger protein -related                                     |
| <b>1240</b> | 252939_at   | 129  | 1.3 | 2.6 | 2.7 | 162  | 0.9 | 1.0 | 2.4 | AT4G39230 | isoflavone reductase, putative                                   |
| <b>1241</b> | 255039_at   | 504  | 1.2 | 1.8 | 1.9 | 534  | 0.9 | 1.1 | 2.4 | AT4G09570 | calcium-dependent protein kinase, putative (CDPK)                |
| <b>1242</b> | 261860_at   | 372  | 1.0 | 1.9 | 1.7 | 364  | 1.2 | 1.6 | 2.4 | AT1G50600 | scarecrow-like transcription factor 5 (SCL5)                     |
| <b>1243</b> | 265941_s_at | 72   | 1.5 | 1.0 | 0.7 | 99   | 0.8 | 1.3 | 2.4 | AT3G32920 | recA -related                                                    |
| <b>1244</b> | 247493_at   | 293  | 1.2 | 2.1 | 1.8 | 306  | 0.9 | 0.8 | 2.4 | AT5G61900 | copine BONZAI1 (BON1)                                            |
| <b>1245</b> | 267261_at   | 2726 | 1.7 | 1.7 | 1.6 | 1240 | 1.0 | 1.1 | 2.4 | AT2G23120 | expressed protein                                                |
| <b>1246</b> | 252335_at   | 331  | 0.8 | 0.9 | 1.3 | 294  | 1.0 | 1.2 | 2.4 | AT3G48860 | expressed protein                                                |
| <b>1247</b> | 264818_at   | 325  | 1.2 | 1.0 | 0.8 | 332  | 1.0 | 1.3 | 2.4 | AT1G03530 | expressed protein                                                |
| <b>1248</b> | 260870_at   | 758  | 0.9 | 1.0 | 1.0 | 814  | 1.0 | 1.4 | 2.4 | AT1G43890 | GTP-binding protein, putative                                    |
| <b>1249</b> | 258830_at   | 1939 | 1.2 | 1.3 | 1.1 | 1799 | 1.0 | 1.2 | 2.4 | AT3G07090 | expressed protein                                                |
| <b>1250</b> | 245255_at   | 893  | 1.1 | 1.0 | 1.1 | 802  | 0.8 | 1.5 | 2.4 | AT4G14110 | COP9 protein                                                     |
| <b>1251</b> | 263239_at   | 129  | 1.0 | 1.5 | 1.3 | 174  | 1.0 | 1.5 | 2.4 | AT2G16570 | amidophosphoribosyltransferase                                   |
| <b>1252</b> | 249269_at   | 324  | 0.9 | 0.9 | 0.8 | 236  | 1.0 | 1.5 | 2.4 | AT5G41770 | cell cycle control crn (crooked neck) protein-related            |
| <b>1253</b> | 257038_at   | 696  | 1.0 | 1.2 | 1.4 | 632  | 1.0 | 0.9 | 2.4 | AT3G19260 | longevity factor-related protein                                 |
| <b>1254</b> | 265661_at   | 1443 | 0.9 | 1.1 | 1.2 | 1309 | 1.0 | 1.2 | 2.4 | AT2G24360 | serine/threonine/tyrosine kinase, putative                       |
| <b>1255</b> | 259447_s_at | 49   | 1.4 | 1.1 | 1.0 | 35   | 1.2 | 1.2 | 2.4 | AT1G02430 | ADP-ribosylation factor, putative                                |
| <b>1256</b> | 257252_at   | 1549 | 1.4 | 1.4 | 1.1 | 1386 | 1.2 | 1.9 | 2.4 | AT3G24170 | glutathione reductase, putative                                  |
| <b>1257</b> | 245557_at   | 435  | 1.1 | 1.2 | 1.0 | 416  | 0.9 | 1.1 | 2.4 | AT4G15410 | phosphatase like protein                                         |
| <b>1258</b> | 246527_at   | 798  | 1.0 | 1.1 | 1.0 | 857  | 1.0 | 1.7 | 2.4 | AT5G15750 | ribosomal protein S4/S9 related                                  |
| <b>1259</b> | 252102_at   | 747  | 1.1 | 1.4 | 1.1 | 312  | 1.0 | 1.0 | 2.4 | AT3G50970 | dehydrin (Xero2)                                                 |
| <b>1260</b> | 248258_at   | 837  | 0.9 | 0.9 | 0.8 | 925  | 0.9 | 1.4 | 2.4 | AT5G53400 | expressed protein                                                |
| <b>1261</b> | 251029_at   | 748  | 1.1 | 1.1 | 1.0 | 1120 | 0.9 | 1.7 | 2.3 | AT5G02050 | expressed protein                                                |
| <b>1262</b> | 249068_at   | 80   | 0.9 | 0.6 | 0.1 | 93   | 0.4 | 1.2 | 2.3 | AT5G43980 | expressed protein                                                |
| <b>1263</b> | 254368_at   | 587  | 1.0 | 0.9 | 0.8 | 523  | 1.0 | 1.6 | 2.3 | AT4G21710 | DNA-directed RNA polymerase (EC 2.7.7.6) II second largest chain |
| <b>1264</b> | 258979_at   | 5331 | 1.1 | 0.8 | 0.6 | 5229 | 1.1 | 1.6 | 2.3 | AT3G09440 | heat shock protein hsc70-3 (hsc70.3)                             |
| <b>1265</b> | 247453_at   | 382  | 1.2 | 1.1 | 0.8 | 365  | 1.0 | 1.5 | 2.3 | AT5G62440 | expressed protein                                                |
| <b>1266</b> | 262061_at   | 76   | 2.0 | 2.2 | 1.7 | 121  | 1.2 | 1.1 | 2.3 | AT1G80110 | expressed protein                                                |

|             |           |       |     |     |     |      |     |     |     |           |                                                                                                       |
|-------------|-----------|-------|-----|-----|-----|------|-----|-----|-----|-----------|-------------------------------------------------------------------------------------------------------|
| <b>1267</b> | 245039_at | 631   | 0.9 | 1.0 | 1.0 | 564  | 1.0 | 1.3 | 2.3 | AT2G26600 | glycosyl hydrolase family 17                                                                          |
| <b>1268</b> | 265356_at | 166   | 1.1 | 1.0 | 1.1 | 178  | 1.1 | 1.2 | 2.3 | AT2G16595 | TRAP protein -related                                                                                 |
| <b>1269</b> | 251649_at | 892   | 1.1 | 1.4 | 1.2 | 859  | 1.0 | 1.0 | 2.3 | AT3G57330 | potential calcium-transporting ATPase 11, plasma membrane-type (Ca <sup>2+</sup> -ATPase, isoform 11) |
| <b>1270</b> | 258759_at | 606   | 1.0 | 1.4 | 1.3 | 578  | 1.0 | 0.9 | 2.3 | AT3G10800 | bZIP family transcription factor                                                                      |
| <b>1271</b> | 245641_at | 193   | 0.9 | 1.1 | 1.1 | 183  | 0.9 | 0.8 | 2.3 | AT1G25370 | expressed protein                                                                                     |
| <b>1272</b> | 266237_at | 374   | 1.1 | 0.9 | 1.0 | 432  | 1.0 | 1.5 | 2.3 | AT2G29540 | DNA-directed RNA polymerase 14 kDa subunit (AtRPAC14)                                                 |
| <b>1273</b> | 252093_at | 233   | 1.2 | 1.1 | 1.0 | 197  | 1.2 | 1.2 | 2.3 | AT3G51500 | expressed protein                                                                                     |
| <b>1274</b> | 267004_at | 509   | 1.0 | 0.9 | 0.9 | 665  | 0.9 | 1.5 | 2.3 | AT2G34260 | transducin / WD-40 repeat protein family                                                              |
| <b>1275</b> | 248151_at | 16275 | 1.3 | 1.1 | 1.4 | 4230 | 1.2 | 1.6 | 2.3 | AT5G54270 | light-harvesting chlorophyll a/b binding protein, putative                                            |
| <b>1276</b> | 253323_at | 334   | 1.0 | 1.5 | 1.6 | 266  | 1.0 | 0.9 | 2.3 | AT4G33920 | expressed protein                                                                                     |
| <b>1277</b> | 260903_at | 89    | 0.9 | 0.9 | 1.0 | 104  | 0.9 | 1.2 | 2.3 | AT1G02460 | polygalacturonase, putative                                                                           |
| <b>1278</b> | 266182_at | 270   | 1.0 | 1.6 | 1.8 | 296  | 1.0 | 1.1 | 2.3 | AT2G02370 | expressed protein                                                                                     |
| <b>1279</b> | 262851_at | 260   | 1.2 | 1.0 | 0.9 | 227  | 1.2 | 1.2 | 2.3 | AT1G20920 | DEAD box RNA helicase, putative                                                                       |
| <b>1280</b> | 255624_at | 1321  | 1.0 | 1.1 | 1.2 | 1227 | 1.0 | 1.3 | 2.3 | AT4G01370 | mitogen-activated protein kinase (MAPK), putative (MPK4)                                              |
| <b>1281</b> | 251643_at | 919   | 1.4 | 1.6 | 1.6 | 773  | 1.1 | 1.2 | 2.3 | AT3G57550 | guanylate kinase-related protein                                                                      |
| <b>1282</b> | 254455_at | 225   | 1.0 | 0.9 | 0.7 | 265  | 0.9 | 1.9 | 2.3 | AT4G21140 | hypothetical protein                                                                                  |
| <b>1283</b> | 251370_at | 815   | 1.1 | 1.3 | 0.9 | 822  | 1.1 | 1.3 | 2.3 | AT3G60450 | expressed protein                                                                                     |
| <b>1284</b> | 254493_at | 506   | 1.1 | 0.9 | 0.9 | 690  | 0.7 | 1.8 | 2.3 | AT4G20020 | putative DAG protein                                                                                  |
| <b>1285</b> | 254210_at | 156   | 1.5 | 1.5 | 1.0 | 119  | 1.0 | 1.1 | 2.3 | AT4G23450 | C3HC4-type zinc finger protein family                                                                 |
| <b>1286</b> | 248497_at | 389   | 1.0 | 1.2 | 1.0 | 353  | 1.1 | 1.3 | 2.3 | AT5G50380 | exocyst subunit EXO70 family                                                                          |
| <b>1287</b> | 261176_at | 601   | 1.1 | 1.1 | 0.9 | 402  | 1.2 | 1.2 | 2.3 | AT1G04780 | expressed protein                                                                                     |
| <b>1288</b> | 255133_at | 234   | 1.2 | 1.5 | 1.3 | 217  | 1.3 | 1.3 | 2.3 | AT4G08320 | tetratricopeptide repeat (TPR)-containing protein                                                     |
| <b>1289</b> | 249086_at | 477   | 0.9 | 1.1 | 0.9 | 302  | 1.1 | 1.2 | 2.3 | AT5G44180 | homeobox transcription factor, putative                                                               |
| <b>1290</b> | 260602_at | 1683  | 1.2 | 2.4 | 2.1 | 1142 | 1.0 | 0.9 | 2.3 | AT1G55920 | serine acetyltransferase                                                                              |
| <b>1291</b> | 252948_at | 150   | 1.5 | 0.8 | 0.6 | 121  | 1.2 | 1.9 | 2.3 | AT4G38600 | expressed protein                                                                                     |
| <b>1292</b> | 260314_at | 1455  | 1.0 | 1.7 | 2.3 | 1185 | 1.0 | 1.0 | 2.3 | AT1G63830 | proline-rich protein family                                                                           |
| <b>1293</b> | 255194_at | 380   | 1.0 | 0.8 | 0.6 | 322  | 0.9 | 1.3 | 2.3 | AT4G07410 | transducin / WD-40 repeat protein famil                                                               |
| <b>1294</b> | 263956_at | 576   | 1.7 | 1.3 | 0.8 | 402  | 1.2 | 1.7 | 2.3 | AT2G35940 | homeodomain protein                                                                                   |
| <b>1295</b> | 259884_at | 292   | 0.9 | 1.0 | 0.9 | 233  | 1.1 | 1.2 | 2.3 | AT1G76390 | expressed protein                                                                                     |
| <b>1296</b> | 266452_at | 252   | 1.0 | 1.6 | 1.2 | 236  | 0.7 | 1.0 | 2.3 | AT2G43320 | expressed protein                                                                                     |
| <b>1297</b> | 259019_at | 153   | 1.0 | 1.5 | 1.8 | 138  | 1.0 | 1.3 | 2.3 | AT3G07370 | expressed protein                                                                                     |
| <b>1298</b> | 253013_at | 1950  | 1.1 | 1.7 | 1.4 | 2955 | 0.9 | 1.7 | 2.3 | AT4G37910 | heat shock protein mtHsc70-1                                                                          |
| <b>1299</b> | 259690_at | 181   | 1.1 | 1.3 | 1.2 | 198  | 1.1 | 1.7 | 2.3 | AT1G63160 | replication factor -related                                                                           |
| <b>1300</b> | 246528_at | 465   | 1.2 | 1.3 | 0.9 | 507  | 0.9 | 1.4 | 2.3 | AT5G15640 | mitochondrial carrier protein family                                                                  |
| <b>1301</b> | 257996_at | 572   | 1.2 | 1.1 | 1.1 | 533  | 1.0 | 1.4 | 2.3 | AT3G19950 | expressed protein                                                                                     |
| <b>1302</b> | 261615_at | 272   | 1.1 | 1.4 | 1.2 | 226  | 1.1 | 1.3 | 2.3 | AT1G33050 | expressed protein                                                                                     |
| <b>1303</b> | 263565_at | 130   | 1.0 | 2.5 | 2.2 | 146  | 1.3 | 1.4 | 2.3 | AT2G15390 | xyloglucan fucosyltransferase, putative                                                               |

|             |             |      |     |     |     |      |     |     |     |           |                                                                   |
|-------------|-------------|------|-----|-----|-----|------|-----|-----|-----|-----------|-------------------------------------------------------------------|
| <b>1304</b> | 258336_at   | 516  | 0.8 | 1.0 | 1.0 | 250  | 1.0 | 1.1 | 2.3 | AT3G16050 | ethylene-inducible protein -related                               |
| <b>1305</b> | 246809_s_at | 391  | 1.1 | 1.0 | 0.9 | 575  | 0.7 | 1.6 | 2.3 | AT5G27140 | SAR DNA-binding protein, putative                                 |
| <b>1306</b> | 245768_at   | 1616 | 1.2 | 2.3 | 2.7 | 1563 | 1.0 | 1.2 | 2.3 | AT1G33590 | disease resistance protein-related (LRR)                          |
| <b>1307</b> | 264936_at   | 675  | 1.2 | 1.4 | 1.4 | 649  | 1.0 | 1.1 | 2.3 | AT1G61140 | SNF2 domain/helicase domain/RING finger domain-containing protein |
| <b>1308</b> | 249537_at   | 865  | 1.0 | 1.0 | 0.9 | 798  | 1.1 | 1.4 | 2.3 | AT5G38830 | cysteine-tRNA ligase -related protein                             |
| <b>1309</b> | 259488_at   | 674  | 1.0 | 0.9 | 0.9 | 528  | 1.2 | 1.6 | 2.3 | AT1G15780 | expressed protein                                                 |
| <b>1310</b> | 248199_at   | 626  | 1.4 | 1.8 | 1.5 | 902  | 1.0 | 1.4 | 2.3 | AT5G54170 | membrane related protein-like                                     |
| <b>1311</b> | 248833_at   | 2852 | 1.0 | 1.0 | 1.0 | 2972 | 1.1 | 1.1 | 2.3 | AT5G47120 | Bax inhibitor-1 (BI-1), putative                                  |
| <b>1312</b> | 246114_at   | 4684 | 1.3 | 1.4 | 1.7 | 1412 | 1.3 | 1.9 | 2.3 | AT5G20250 | glycosyl hydrolase family 36                                      |
| <b>1313</b> | 254393_at   | 726  | 1.0 | 1.0 | 0.9 | 632  | 1.0 | 1.5 | 2.3 | AT4G21580 | oxidoreductase, zinc-binding dehydrogenase family                 |
| <b>1314</b> | 264883_s_at | 1035 | 1.0 | 1.1 | 1.1 | 931  | 1.0 | 1.1 | 2.3 | AT1G61250 | secretory carrier membrane protein                                |
| <b>1315</b> | 256129_at   | 1154 | 1.2 | 1.9 | 1.9 | 1413 | 1.0 | 1.0 | 2.3 | AT1G18210 | calcium-binding protein, putative                                 |
| <b>1316</b> | 264447_at   | 361  | 1.0 | 1.0 | 1.0 | 394  | 1.0 | 1.4 | 2.3 | AT1G27300 | expressed protein                                                 |
| <b>1317</b> | 264232_at   | 315  | 1.0 | 3.4 | 4.4 | 372  | 1.1 | 0.9 | 2.3 | AT1G67470 | protein kinase family                                             |
| <b>1318</b> | 259318_at   | 441  | 1.0 | 0.9 | 1.0 | 354  | 1.1 | 1.4 | 2.3 | AT3G01100 | ERD4 protein-related                                              |
| <b>1319</b> | 266181_at   | 496  | 1.0 | 1.2 | 1.2 | 440  | 1.1 | 1.7 | 2.3 | AT2G02390 | glutathione transferase, putative                                 |
| <b>1320</b> | 266782_at   | 246  | 1.2 | 0.9 | 1.0 | 142  | 0.9 | 1.4 | 2.3 | AT2G29120 | glutamate receptor family (GLR2.7)                                |
| <b>1321</b> | 262710_at   | 1433 | 0.9 | 1.1 | 0.9 | 1179 | 1.0 | 1.3 | 2.3 | AT1G16210 | expressed protein                                                 |
| <b>1322</b> | 251177_at   | 450  | 1.1 | 0.9 | 0.9 | 413  | 0.9 | 1.4 | 2.3 | AT3G63400 | cyclophilin -related protein                                      |
| <b>1323</b> | 266106_at   | 346  | 1.1 | 1.5 | 1.7 | 280  | 1.1 | 1.2 | 2.3 | AT2G45170 | microtubule-associated protein -related                           |
| <b>1324</b> | 263729_at   | 243  | 1.3 | 1.2 | 1.1 | 228  | 0.8 | 1.7 | 2.3 | AT1G60080 | expressed protein                                                 |
| <b>1325</b> | 254108_at   | 557  | 1.0 | 1.2 | 0.9 | 601  | 1.0 | 1.1 | 2.3 | AT4G25230 | C3HC4-type zinc finger protein family                             |
| <b>1326</b> | 250309_at   | 162  | 0.9 | 1.0 | 0.8 | 134  | 0.9 | 1.3 | 2.3 | AT5G12220 | expressed protein                                                 |
| <b>1327</b> | 259129_at   | 183  | 1.5 | 1.6 | 1.5 | 172  | 1.0 | 1.4 | 2.3 | AT3G02150 | TCP family transcription factor TFPD                              |
| <b>1328</b> | 257192_at   | 1294 | 1.0 | 1.2 | 1.3 | 1033 | 1.2 | 1.6 | 2.3 | AT3G13200 | expressed protein                                                 |
| <b>1329</b> | 257657_at   | 732  | 1.0 | 0.9 | 0.9 | 671  | 1.1 | 1.5 | 2.3 | AT3G13235 | ubiquitin family                                                  |
| <b>1330</b> | 250670_at   | 1296 | 1.2 | 1.3 | 1.1 | 755  | 1.0 | 1.0 | 2.3 | AT5G06860 | polygalacturonase inhibiting protein (PGIP1)                      |
| <b>1331</b> | 248550_at   | 809  | 1.1 | 1.1 | 1.2 | 754  | 1.0 | 1.2 | 2.3 | AT5G50210 | expressed protein                                                 |
| <b>1332</b> | 265676_at   | 1258 | 1.1 | 1.0 | 0.8 | 943  | 1.0 | 1.2 | 2.3 | AT2G32070 | CCR4-associated factor -related                                   |
| <b>1333</b> | 254247_at   | 337  | 1.4 | 1.3 | 1.4 | 399  | 1.1 | 1.2 | 2.3 | AT4G23260 | expressed protein                                                 |
| <b>1334</b> | 265930_at   | 721  | 1.2 | 1.1 | 0.9 | 632  | 0.9 | 1.6 | 2.3 | AT2G18510 | pre-mRNA splicing factor SF3b, putative                           |
| <b>1335</b> | 251841_at   | 352  | 1.1 | 1.0 | 0.6 | 273  | 1.0 | 1.4 | 2.3 | AT3G54980 | pentatricopeptide (PPR) repeat-containing protein                 |
| <b>1336</b> | 260276_at   | 106  | 0.9 | 1.2 | 1.5 | 117  | 0.8 | 0.6 | 2.3 | AT1G80450 | expressed protein                                                 |
| <b>1337</b> | 262326_at   | 1874 | 1.2 | 1.2 | 0.8 | 1387 | 1.1 | 1.4 | 2.3 | AT1G64140 | expressed protein                                                 |
| <b>1338</b> | 245666_at   | 497  | 1.0 | 1.5 | 1.9 | 487  | 0.9 | 0.9 | 2.3 | AT1G28280 | expressed protein                                                 |
| <b>1339</b> | 262874_at   | 255  | 1.2 | 1.2 | 1.0 | 260  | 0.8 | 1.2 | 2.3 | AT1G65020 | hypothetical protein                                              |
| <b>1340</b> | 250260_at   | 704  | 1.1 | 1.5 | 1.5 | 577  | 1.2 | 1.4 | 2.3 | AT5G13810 | expressed protein                                                 |

|             |             |      |     |     |     |      |     |     |     |           |                                                                                      |
|-------------|-------------|------|-----|-----|-----|------|-----|-----|-----|-----------|--------------------------------------------------------------------------------------|
| <b>1341</b> | 259743_at   | 487  | 0.7 | 0.9 | 0.9 | 481  | 0.9 | 1.2 | 2.3 | AT1G71140 | MATE efflux protein family                                                           |
| <b>1342</b> | 247241_at   | 508  | 0.9 | 1.0 | 0.9 | 444  | 1.0 | 1.6 | 2.3 | AT5G64680 | expressed protein                                                                    |
| <b>1343</b> | 266235_at   | 203  | 1.0 | 1.2 | 1.5 | 144  | 1.2 | 1.2 | 2.3 | AT2G02360 | F-box protein (SKP1 interacting partner 3-related)                                   |
| <b>1344</b> | 245352_at   | 1398 | 1.3 | 1.3 | 0.9 | 741  | 1.0 | 1.5 | 2.3 | AT4G15490 | UDP-glycosyltransferase, putative                                                    |
| <b>1345</b> | 255231_at   | 373  | 1.0 | 1.1 | 0.9 | 319  | 0.9 | 1.3 | 2.3 | AT4G05460 | F-box protein family, AtFBL20                                                        |
| <b>1346</b> | 258787_at   | 127  | 1.4 | 3.3 | 4.2 | 117  | 0.9 | 0.9 | 2.3 | AT3G11840 | expressed protein                                                                    |
| <b>1347</b> | 261419_at   | 379  | 1.1 | 1.0 | 0.6 | 321  | 0.8 | 1.5 | 2.3 | AT1G07840 | expressed protein                                                                    |
| <b>1348</b> | 245496_at   | 311  | 1.2 | 1.1 | 0.9 | 264  | 0.9 | 1.1 | 2.3 | AT4G16440 | LET1 like protein                                                                    |
| <b>1349</b> | 249374_at   | 774  | 1.0 | 1.0 | 1.1 | 820  | 1.1 | 1.8 | 2.3 | AT5G40580 | 20S proteasome beta subunit B (PBB2)                                                 |
| <b>1350</b> | 266471_at   | 412  | 1.0 | 0.9 | 0.9 | 581  | 1.0 | 2.0 | 2.3 | AT2G31060 | GTP-binding protein -related                                                         |
| <b>1351</b> | 259352_at   | 138  | 1.0 | 0.9 | 0.9 | 103  | 1.2 | 1.2 | 2.3 | AT3G05170 | expressed protein                                                                    |
| <b>1352</b> | 263822_at   | 77   | 0.9 | 0.6 | 0.9 | 44   | 1.0 | 1.5 | 2.3 | AT2G40240 | pentatricopeptide (PPR) repeat-containing protein                                    |
| <b>1353</b> | 246409_at   | 176  | 1.2 | 0.9 | 0.7 | 150  | 1.1 | 0.9 | 2.3 | AT1G57700 | CRK1 protein -related                                                                |
| <b>1354</b> | 264213_at   | 96   | 2.0 | 4.8 | 7.0 | 95   | 0.9 | 0.8 | 2.3 | AT1G65390 | disease resistance protein (TIR class), putative                                     |
| <b>1355</b> | 260251_at   | 207  | 1.0 | 1.1 | 0.9 | 161  | 0.9 | 1.2 | 2.3 | AT1G74250 | heat shock protein -related                                                          |
| <b>1356</b> | 260756_at   | 371  | 1.1 | 1.1 | 1.0 | 381  | 0.8 | 1.1 | 2.3 | AT1G48970 | hypothetical protein                                                                 |
| <b>1357</b> | 265413_s_at | 195  | 1.0 | 1.1 | 1.7 | 114  | 1.6 | 1.7 | 2.3 | AT2G16650 | expressed protein                                                                    |
| <b>1358</b> | 261207_at   | 246  | 0.9 | 1.1 | 0.9 | 227  | 0.9 | 1.3 | 2.3 | AT1G12830 | peroxisomal targeting signal type 2 receptor                                         |
| <b>1359</b> | 259341_at   | 254  | 1.2 | 1.1 | 1.3 | 292  | 0.8 | 1.1 | 2.3 | AT3G03740 | expressed protein                                                                    |
| <b>1360</b> | 262219_at   | 200  | 1.7 | 1.9 | 1.3 | 222  | 0.9 | 0.9 | 2.2 | AT1G74750 | pentatricopeptide (PPR) repeat-containing protein                                    |
| <b>1361</b> | 245277_at   | 667  | 2.2 | 2.8 | 3.0 | 415  | 1.1 | 1.6 | 2.2 | AT4G15550 | UDP-glucose:indole-3-acetate beta-D-glucosyltransferase (iaglu)                      |
| <b>1362</b> | 245751_s_at | 349  | 1.2 | 1.5 | 1.4 | 274  | 0.9 | 1.4 | 2.2 | AT1G25988 | hypothetical protein                                                                 |
| <b>1363</b> | 262408_at   | 190  | 1.2 | 1.6 | 1.2 | 225  | 0.9 | 0.9 | 2.2 | AT1G34750 | protein phosphatase 2C (PP2C), putative                                              |
| <b>1364</b> | 263073_at   | 1578 | 0.9 | 1.0 | 0.8 | 1400 | 1.1 | 1.3 | 2.2 | AT2G17500 | auxin efflux carrier protein family                                                  |
| <b>1365</b> | 257612_at   | 179  | 1.2 | 1.7 | 1.6 | 230  | 1.0 | 1.0 | 2.2 | AT3G26600 | expressed protein                                                                    |
| <b>1366</b> | 258957_at   | 1415 | 1.2 | 1.3 | 0.6 | 1009 | 1.1 | 2.0 | 2.2 | AT3G01420 | feebly-related protein                                                               |
| <b>1367</b> | 250818_at   | 876  | 1.1 | 1.2 | 0.9 | 793  | 0.7 | 0.8 | 2.2 | AT5G04930 | phospholipid-transporting ATPase 1 (aminophospholipid flippase 1) (magnesium-ATPase) |
| <b>1368</b> | 261174_at   | 900  | 0.9 | 0.9 | 0.8 | 879  | 1.0 | 1.6 | 2.2 | AT1G04810 | 26S proteasome regulatory subunit (RPN2), putative                                   |
| <b>1369</b> | 247351_at   | 1258 | 2.0 | 3.6 | 3.4 | 1139 | 1.1 | 1.4 | 2.2 | AT5G63790 | No apical meristem (NAM) protein family                                              |
| <b>1370</b> | 250680_at   | 108  | 1.0 | 1.1 | 1.5 | 114  | 0.9 | 1.0 | 2.2 | AT5G06570 | expressed protein                                                                    |
| <b>1371</b> | 250493_at   | 54   | 1.5 | 2.7 | 4.9 | 117  | 0.7 | 0.7 | 2.2 | AT5G09800 | hypothetical protein                                                                 |
| <b>1372</b> | 263704_at   | 935  | 1.0 | 2.1 | 2.8 | 850  | 1.2 | 1.1 | 2.2 | AT1G31130 | expressed protein                                                                    |
| <b>1373</b> | 252652_at   | 379  | 1.5 | 2.3 | 2.7 | 253  | 1.2 | 1.3 | 2.2 | AT3G44720 | prephenate dehydratase family                                                        |
| <b>1374</b> | 261784_at   | 181  | 1.0 | 1.2 | 0.8 | 189  | 1.2 | 2.0 | 2.2 | AT1G08220 | hypothetical protein                                                                 |
| <b>1375</b> | 246088_at   | 447  | 1.1 | 1.1 | 0.9 | 358  | 0.9 | 1.3 | 2.2 | AT5G20600 | expressed protein                                                                    |
| <b>1376</b> | 249895_at   | 223  | 1.2 | 0.9 | 1.1 | 173  | 1.2 | 1.3 | 2.2 | AT5G22500 | male sterility 2-related protein (emb)CAA68191.1)                                    |

|      |           |      |     |     |     |      |     |     |     |           |                                                                      |
|------|-----------|------|-----|-----|-----|------|-----|-----|-----|-----------|----------------------------------------------------------------------|
| 1377 | 265721_at | 260  | 1.3 | 1.3 | 1.1 | 245  | 0.9 | 1.4 | 2.2 | AT2G40090 | ABC1 protein -related                                                |
| 1378 | 265442_at | 327  | 1.2 | 1.4 | 1.2 | 408  | 0.8 | 1.5 | 2.2 | AT2G20940 | expressed protein                                                    |
| 1379 | 263005_at | 195  | 1.0 | 1.7 | 1.1 | 148  | 1.3 | 1.4 | 2.2 | AT1G54540 | hypothetical protein                                                 |
| 1380 | 264486_at | 1293 | 1.1 | 0.9 | 1.0 | 894  | 1.1 | 1.6 | 2.2 | AT1G77180 | expressed protein                                                    |
| 1381 | 267517_at | 4532 | 1.4 | 1.0 | 0.9 | 1570 | 1.2 | 1.8 | 2.2 | AT2G30520 | expressed protein                                                    |
| 1382 | 256939_at | 1366 | 1.0 | 0.8 | 1.1 | 1544 | 1.2 | 1.6 | 2.2 | AT3G22630 | 20S proteasome beta subunit D (PBD1)                                 |
| 1383 | 260656_at | 527  | 1.7 | 3.6 | 5.8 | 465  | 0.8 | 0.9 | 2.2 | AT1G19380 | expressed protein                                                    |
| 1384 | 245122_at | 577  | 1.3 | 1.1 | 1.1 | 457  | 0.7 | 1.2 | 2.2 | AT2G47420 | dimethyladenosine transferase -related                               |
| 1385 | 265627_at | 370  | 0.8 | 0.9 | 1.0 | 246  | 1.3 | 1.7 | 2.2 | AT2G27285 | expressed protein                                                    |
| 1386 | 248868_at | 500  | 1.0 | 2.6 | 4.5 | 475  | 1.0 | 1.0 | 2.2 | AT5G46780 | proline-rich protein family                                          |
| 1387 | 258453_at | 1169 | 0.8 | 0.9 | 0.8 | 1207 | 0.9 | 1.3 | 2.2 | AT3G22320 | DNA-directed RNA polymerase (RNA polymerase), putative               |
| 1388 | 261841_at | 686  | 1.1 | 1.4 | 1.2 | 564  | 0.9 | 1.0 | 2.2 | AT1G15920 | BTG1 binding factor 1 -related                                       |
| 1389 | 250679_at | 198  | 1.2 | 1.1 | 0.9 | 307  | 0.7 | 1.5 | 2.2 | AT5G06550 | hypothetical protein                                                 |
| 1390 | 247545_at | 842  | 1.0 | 1.1 | 0.9 | 692  | 1.0 | 1.1 | 2.2 | AT5G61530 | auxin-regulated protein                                              |
| 1391 | 259143_at | 177  | 0.7 | 1.2 | 1.7 | 171  | 0.8 | 1.0 | 2.2 | AT3G10190 | calmodulin, putative                                                 |
| 1392 | 248983_at | 1489 | 1.0 | 1.3 | 1.3 | 1410 | 1.0 | 1.1 | 2.2 | AT5G45130 | ras-related GTP-binding protein RHA1                                 |
| 1393 | 259739_at | 296  | 0.8 | 0.8 | 0.7 | 191  | 1.2 | 1.9 | 2.2 | AT1G64350 | transducin / WD-40 repeat protein family                             |
| 1394 | 254891_at | 617  | 0.9 | 0.9 | 0.7 | 490  | 1.1 | 1.7 | 2.2 | AT4G11740 | expressed protein                                                    |
| 1395 | 246612_at | 325  | 1.1 | 0.8 | 0.6 | 216  | 1.3 | 1.6 | 2.2 | AT5G35320 | expressed protein                                                    |
| 1396 | 258880_at | 595  | 1.0 | 1.3 | 1.2 | 535  | 1.3 | 0.9 | 2.2 | AT3G06420 | (AtAPG8h) autophagy 8h                                               |
| 1397 | 245074_at | 127  | 1.4 | 1.7 | 2.1 | 134  | 1.2 | 0.8 | 2.2 | AT2G23200 | protein kinase family                                                |
| 1398 | 260026_at | 1046 | 1.0 | 1.3 | 1.5 | 872  | 1.0 | 1.1 | 2.2 | AT1G29970 | expressed protein                                                    |
| 1399 | 251121_at | 296  | 1.0 | 1.4 | 1.4 | 304  | 1.0 | 1.2 | 2.2 | AT3G63420 | heterotrimeric G protein gamma-subunit (AGG1)                        |
| 1400 | 258679_at | 2396 | 1.1 | 1.4 | 1.1 | 3324 | 1.0 | 1.6 | 2.2 | AT3G08590 | 2,3-bisphosphoglycerate-independent phosphoglycerate mutase -related |
| 1401 | 254058_at | 978  | 1.1 | 1.1 | 1.0 | 772  | 1.0 | 1.3 | 2.2 | AT4G25210 | expressed protein                                                    |
| 1402 | 255148_at | 211  | 1.1 | 1.1 | 1.0 | 180  | 1.1 | 1.1 | 2.2 | AT4G08470 | mitogen-activated protein kinase, putative                           |
| 1403 | 248814_at | 142  | 1.0 | 2.2 | 2.6 | 161  | 1.2 | 0.7 | 2.2 | AT5G46910 | hypothetical protein                                                 |
| 1404 | 255225_at | 436  | 0.9 | 0.9 | 0.8 | 481  | 0.9 | 1.2 | 2.2 | AT4G05410 | transducin / WD-40 repeat protein family                             |
| 1405 | 247164_at | 1007 | 1.1 | 1.2 | 0.9 | 1054 | 1.1 | 1.5 | 2.2 | AT5G65720 | NifS-related aminotransferase                                        |
| 1406 | 264465_at | 506  | 0.8 | 0.6 | 0.7 | 405  | 0.7 | 1.2 | 2.2 | AT1G10230 | E3 ubiquitin ligase SCF complex subunit SKP1/ASK1 (At18), putative   |
| 1407 | 259887_at | 533  | 1.0 | 1.3 | 1.0 | 289  | 1.2 | 1.0 | 2.2 | AT1G76360 | protein kinase, putative                                             |
| 1408 | 260477_at | 211  | 1.2 | 4.9 | 6.2 | 223  | 1.0 | 0.9 | 2.2 | AT1G11050 | protein kinase family                                                |
| 1409 | 251804_at | 945  | 1.2 | 1.5 | 1.5 | 596  | 0.7 | 0.8 | 2.2 | AT3G55430 | glycosyl hydrolase family 17 (beta-1,3-glucanase)                    |
| 1410 | 251440_at | 75   | 1.4 | 1.1 | 0.8 | 86   | 0.8 | 1.8 | 2.2 | AT3G60010 | E3 ubiquitin ligase SCF complex subunit SKP1/ASK1 (At13), putative   |
| 1411 | 250819_at | 1039 | 1.3 | 1.4 | 1.3 | 920  | 1.0 | 1.1 | 2.2 | AT5G05100 | expressed protein                                                    |

|             |             |      |     |      |      |      |     |     |     |           |                                                                |
|-------------|-------------|------|-----|------|------|------|-----|-----|-----|-----------|----------------------------------------------------------------|
| <b>1412</b> | 256881_at   | 172  | 1.3 | 1.4  | 1.0  | 175  | 1.1 | 1.3 | 2.2 | AT3G26410 | expressed protein                                              |
| <b>1413</b> | 254204_at   | 777  | 1.5 | 3.6  | 3.1  | 749  | 1.0 | 1.0 | 2.2 | AT4G24160 | hydrolase, alpha/beta fold family                              |
| <b>1414</b> | 258061_at   | 1012 | 1.0 | 1.0  | 0.9  | 790  | 1.0 | 1.3 | 2.2 | AT3G25910 | expressed protein                                              |
| <b>1415</b> | 264436_at   | 1457 | 2.4 | 2.0  | 0.8  | 909  | 1.1 | 2.0 | 2.2 | AT1G10370 | glutathione transferase, putative                              |
| <b>1416</b> | 254846_at   | 446  | 1.0 | 1.7  | 1.6  | 290  | 1.0 | 1.3 | 2.2 | AT4G11830 | phospholipase D-gamma, putative                                |
| <b>1417</b> | 260880_at   | 979  | 1.1 | 1.3  | 1.0  | 1041 | 1.0 | 1.2 | 2.2 | AT1G21380 | expressed protein                                              |
| <b>1418</b> | 247279_at   | 920  | 1.4 | 3.4  | 5.4  | 1038 | 0.8 | 0.6 | 2.2 | AT5G64310 | arabinogalactan-protein (AGP1)                                 |
| <b>1419</b> | 262898_at   | 27   | 3.0 | 5.5  | 5.3  | 63   | 0.3 | 0.6 | 2.2 | AT1G59850 | hypothetical protein                                           |
| <b>1420</b> | 253666_at   | 7742 | 1.1 | 1.0  | 0.8  | 3086 | 0.8 | 1.0 | 2.2 | AT4G30270 | xyloglucan endotransglycosylase (meri5B)                       |
| <b>1421</b> | 255677_at   | 372  | 1.5 | 1.5  | 0.9  | 329  | 1.1 | 1.1 | 2.2 | AT4G00500 | calmodulin-binding heat-shock protein                          |
| <b>1422</b> | 265359_at   | 507  | 1.2 | 0.7  | 0.4  | 167  | 1.1 | 1.1 | 2.2 | AT2G16720 | myb DNA-binding protein                                        |
| <b>1423</b> | 247393_at   | 252  | 1.2 | 1.8  | 2.9  | 195  | 1.0 | 0.9 | 2.2 | AT5G63130 | octicosapeptide/Phox/Bem1p (PB1) domain-containing protein     |
| <b>1424</b> | 255711_at   | 692  | 1.0 | 0.8  | 0.6  | 465  | 1.1 | 1.6 | 2.2 | AT4G00090 | transducin / WD-40 repeat protein family                       |
| <b>1425</b> | 256910_at   | 438  | 0.8 | 0.9  | 0.7  | 409  | 0.8 | 1.3 | 2.2 | AT3G24080 | expressed protein                                              |
| <b>1426</b> | 257598_at   | 547  | 1.1 | 1.0  | 1.0  | 443  | 1.2 | 1.4 | 2.2 | AT3G24800 | E3 ubiquitin ligase, PRT1                                      |
| <b>1427</b> | 258665_at   | 766  | 1.0 | 1.8  | 2.5  | 850  | 1.0 | 1.0 | 2.2 | AT3G08710 | thioredoxin family                                             |
| <b>1428</b> | 266888_s_at | 484  | 1.7 | 1.4  | 1.2  | 418  | 0.9 | 1.2 | 2.2 | AT2G44750 | thiamin pyrophosphokinase -related                             |
| <b>1429</b> | 262094_at   | 976  | 1.1 | 0.9  | 1.1  | 1557 | 0.8 | 1.7 | 2.2 | AT1G56110 | nucleolar protein Nop56, putative                              |
| <b>1430</b> | 246422_at   | 496  | 1.1 | 1.6  | 1.9  | 461  | 1.0 | 1.1 | 2.2 | AT5G17060 | ADP-ribosylation factor, putative                              |
| <b>1431</b> | 252076_at   | 1024 | 0.9 | 0.7  | 0.6  | 613  | 0.9 | 0.8 | 2.2 | AT3G51660 | Macrophage migration inhibitory factor (MIF) family            |
| <b>1432</b> | 259890_at   | 1196 | 1.1 | 1.4  | 1.3  | 954  | 0.8 | 1.1 | 2.2 | AT1G72750 | inner mitochondrial membrane protein                           |
| <b>1433</b> | 245178_at   | 476  | 0.7 | 1.0  | 1.2  | 340  | 1.2 | 2.0 | 2.2 | AT5G12390 | expressed protein                                              |
| <b>1434</b> | 263978_at   | 3006 | 1.1 | 1.1  | 1.2  | 2502 | 1.0 | 1.5 | 2.2 | AT2G42680 | expressed protein                                              |
| <b>1435</b> | 264968_at   | 968  | 1.2 | 1.1  | 1.0  | 837  | 1.2 | 1.7 | 2.2 | AT1G67360 | stress related protein -related                                |
| <b>1436</b> | 259850_at   | 93   | 1.3 | 2.7  | 2.3  | 80   | 1.0 | 0.8 | 2.2 | AT1G72240 | expressed protein                                              |
| <b>1437</b> | 265077_at   | 806  | 1.0 | 1.2  | 1.1  | 936  | 1.0 | 1.1 | 2.2 | AT1G55530 | expressed protein                                              |
| <b>1438</b> | 264291_at   | 447  | 1.0 | 0.9  | 0.8  | 323  | 1.1 | 1.2 | 2.2 | AT1G78800 | glycosyltransferase family 1                                   |
| <b>1439</b> | 248163_at   | 630  | 1.6 | 1.7  | 1.4  | 263  | 1.1 | 0.8 | 2.2 | AT5G54510 | auxin-responsive-related protein                               |
| <b>1440</b> | 260072_at   | 1767 | 1.4 | 1.7  | 1.5  | 961  | 1.2 | 1.7 | 2.2 | AT1G73650 | expressed protein                                              |
| <b>1441</b> | 248448_at   | 120  | 1.1 | 11.7 | 18.7 | 85   | 0.8 | 1.1 | 2.2 | AT5G51190 | AP2 domain transcription factor, putative                      |
| <b>1442</b> | 253859_at   | 75   | 3.0 | 4.4  | 5.9  | 87   | 1.9 | 1.3 | 2.2 | AT4G27657 | expressed protein                                              |
| <b>1443</b> | 254357_at   | 1842 | 1.1 | 1.1  | 1.1  | 1515 | 1.2 | 1.6 | 2.2 | AT4G22220 | iron-sulfur cluster assembly complex protein, putative (ISCU1) |
| <b>1444</b> | 253672_at   | 214  | 1.0 | 0.9  | 0.9  | 200  | 1.0 | 1.3 | 2.2 | AT4G29820 | mRNA cleavage factor subunit - like protein                    |
| <b>1445</b> | 257266_at   | 957  | 0.9 | 1.0  | 0.8  | 818  | 0.8 | 1.1 | 2.2 | AT3G15010 | RNA recognition motif (RRM) - containing protein               |
| <b>1446</b> | 255787_at   | 672  | 1.3 | 1.7  | 1.5  | 523  | 0.8 | 1.2 | 2.2 | AT2G33590 | cinnamoyl-CoA reductase family                                 |
| <b>1447</b> | 247820_at   | 542  | 1.9 | 1.8  | 1.3  | 391  | 1.2 | 1.0 | 2.2 | AT5G58380 | CBL-interacting protein kinase 10                              |



|      |             |      |     |     |     |      |     |     |     |           |                                                      |
|------|-------------|------|-----|-----|-----|------|-----|-----|-----|-----------|------------------------------------------------------|
| 1448 | 246017_at   | 528  | 1.4 | 1.5 | 1.3 | 636  | 1.1 | 1.8 | 2.2 | AT5G10730 | expressed protein                                    |
| 1449 | 257019_at   | 582  | 0.9 | 1.0 | 0.9 | 573  | 1.1 | 1.4 | 2.2 | AT3G19640 | expressed protein                                    |
| 1450 | 253778_at   | 650  | 1.0 | 1.0 | 0.9 | 569  | 0.9 | 1.1 | 2.2 | AT4G28480 | heat shock protein, putative                         |
| 1451 | 246066_at   | 764  | 1.3 | 1.1 | 0.8 | 658  | 1.1 | 1.4 | 2.2 | AT5G19400 | expressed protein                                    |
| 1452 | 248934_at   | 28   | 1.2 | 1.1 | 2.0 | 38   | 1.2 | 0.7 | 2.2 | AT5G46080 | protein kinase family                                |
| 1453 | 267230_at   | 450  | 1.0 | 1.7 | 3.1 | 310  | 1.0 | 1.4 | 2.2 | AT2G44080 | expressed protein                                    |
| 1454 | 258019_at   | 47   | 0.8 | 1.3 | 1.4 | 44   | 1.3 | 1.4 | 2.2 | AT3G19470 | F-box protein family                                 |
| 1455 | 264357_at   | 397  | 1.1 | 0.9 | 0.8 | 287  | 0.9 | 1.4 | 2.2 | AT1G03360 | expressed protein                                    |
| 1456 | 254300_at   | 131  | 0.8 | 1.1 | 0.9 | 98   | 0.8 | 0.9 | 2.2 | AT4G22780 | uridylyltransferase-related                          |
| 1457 | 250849_at   | 1522 | 1.3 | 1.2 | 1.0 | 1314 | 1.0 | 1.3 | 2.2 | AT5G04410 | NAC2 protein                                         |
| 1458 | 262521_at   | 504  | 0.9 | 0.9 | 0.9 | 449  | 0.9 | 1.2 | 2.2 | AT1G17130 | expressed protein                                    |
| 1459 | 263921_at   | 2464 | 1.0 | 1.1 | 0.8 | 2461 | 1.0 | 1.5 | 2.2 | AT2G36460 | fructose-bisphosphate aldolase, putative             |
| 1460 | 265850_at   | 216  | 1.1 | 1.1 | 1.0 | 222  | 1.1 | 1.6 | 2.2 | AT2G35720 | DnaJ protein family                                  |
| 1461 | 247593_at   | 2702 | 1.1 | 1.0 | 0.7 | 2807 | 0.9 | 1.2 | 2.2 | AT5G60790 | ABC transporter family protein                       |
| 1462 | 258501_at   | 309  | 1.1 | 1.8 | 2.3 | 274  | 1.3 | 1.1 | 2.2 | AT3G06780 | glycine-rich protein                                 |
| 1463 | 257788_at   | 111  | 1.2 | 1.2 | 1.8 | 139  | 0.9 | 0.8 | 2.2 | AT3G27010 | TCP family transcription factor, putative            |
| 1464 | 246863_at   | 921  | 1.0 | 1.2 | 1.2 | 1055 | 1.0 | 1.3 | 2.2 | AT5G25940 | nodulin - like protein                               |
| 1465 | 255227_at   | 438  | 1.1 | 1.3 | 1.0 | 466  | 0.9 | 1.3 | 2.2 | AT4G05440 | D123 -related protein                                |
| 1466 | 249040_at   | 1489 | 1.0 | 1.0 | 1.0 | 1316 | 1.0 | 1.5 | 2.2 | AT5G44320 | eukaryotic translation initiation factor 3 subunit 7 |
| 1467 | 262188_at   | 342  | 0.9 | 1.0 | 0.5 | 263  | 0.8 | 1.2 | 2.2 | AT1G77810 | Avr9 elicitor response protein -related              |
| 1468 | 254673_at   | 281  | 1.5 | 1.5 | 1.1 | 321  | 0.9 | 0.9 | 2.2 | AT4G18430 | GTP-binding protein, putative                        |
| 1469 | 247054_at   | 417  | 0.9 | 1.1 | 0.9 | 312  | 1.3 | 1.2 | 2.2 | AT5G66730 | zinc finger protein                                  |
| 1470 | 260387_at   | 1754 | 1.1 | 1.7 | 1.8 | 1966 | 0.9 | 0.9 | 2.2 | AT1G74100 | sulfotransferase family                              |
| 1471 | 248631_at   | 304  | 0.9 | 1.2 | 1.5 | 233  | 1.0 | 1.3 | 2.2 | AT5G49000 | Kelch repeat containing F-box protein family         |
| 1472 | 262641_at   | 223  | 1.2 | 0.9 | 0.9 | 313  | 1.1 | 1.3 | 2.2 | AT1G62730 | expressed protein                                    |
| 1473 | 258536_at   | 421  | 1.0 | 0.8 | 0.8 | 285  | 1.0 | 1.1 | 2.2 | AT3G06540 | Rab escort protein -related                          |
| 1474 | 246122_at   | 524  | 1.3 | 1.7 | 1.2 | 275  | 1.3 | 2.2 | 2.2 | AT5G20380 | hypothetical protein                                 |
| 1475 | 255714_at   | 1208 | 1.1 | 1.4 | 1.3 | 1117 | 0.9 | 1.0 | 2.2 | AT4G00300 | fringe-related protein                               |
| 1476 | 246575_at   | 791  | 1.1 | 0.9 | 0.7 | 750  | 0.8 | 1.4 | 2.2 | AT1G31660 | bystin -related                                      |
| 1477 | 258153_at   | 605  | 1.1 | 1.0 | 0.9 | 529  | 1.0 | 1.5 | 2.2 | AT3G18165 | expressed protein                                    |
| 1478 | 260687_at   | 350  | 1.0 | 0.9 | 0.9 | 293  | 1.1 | 1.6 | 2.2 | AT1G17530 | inner mitochondrial membrane protein -related        |
| 1479 | 253114_at   | 817  | 1.0 | 1.0 | 0.9 | 644  | 1.2 | 1.5 | 2.2 | AT4G35860 | GTP-binding protein, putative                        |
| 1480 | 255844_at   | 111  | 1.2 | 2.2 | 2.9 | 126  | 0.9 | 1.0 | 2.2 | AT2G33580 | protein kinase -related                              |
| 1481 | 262524_at   | 433  | 1.0 | 1.0 | 0.8 | 378  | 1.0 | 1.2 | 2.2 | AT1G17070 | tuftelin-interacting-related protein                 |
| 1482 | 265217_s_at | 310  | 1.2 | 0.8 | 0.8 | 236  | 1.2 | 1.0 | 2.2 | AT1G05090 | expressed protein                                    |
| 1483 | 251861_at   | 352  | 0.7 | 0.9 | 1.3 | 265  | 1.1 | 1.1 | 2.2 | AT3G54810 | GATA zinc finger protein                             |
| 1484 | 251314_at   | 461  | 1.0 | 1.2 | 1.3 | 312  | 1.4 | 1.7 | 2.2 | AT3G61180 | C3HC4-type zinc finger protein family                |

|      |             |      |     |     |     |      |     |     |     |           |                                                            |
|------|-------------|------|-----|-----|-----|------|-----|-----|-----|-----------|------------------------------------------------------------|
| 1485 | 263222_at   | 219  | 0.9 | 1.0 | 1.2 | 166  | 1.0 | 1.1 | 2.2 | AT1G30640 | protein kinase, putative                                   |
| 1486 | 245787_at   | 718  | 1.1 | 1.1 | 1.0 | 588  | 1.1 | 1.5 | 2.2 | AT1G32130 | expressed protein                                          |
| 1487 | 265947_at   | 1242 | 0.9 | 0.9 | 0.9 | 1345 | 0.9 | 1.6 | 2.2 | AT2G19540 | transducin / WD-40 repeat protein family                   |
| 1488 | 249485_at   | 90   | 1.2 | 3.3 | 3.0 | 72   | 0.5 | 0.7 | 2.1 | AT5G39020 | protein kinase family                                      |
| 1489 | 249944_at   | 199  | 1.2 | 1.3 | 1.2 | 175  | 0.8 | 1.2 | 2.1 | AT5G22290 | No apical meristem (NAM) protein family                    |
| 1490 | 245317_at   | 2715 | 0.9 | 0.8 | 0.5 | 1349 | 1.0 | 0.9 | 2.1 | AT4G15610 | expressed integral membrane protein common family          |
| 1491 | 257897_at   | 256  | 1.0 | 1.0 | 1.0 | 226  | 1.0 | 1.3 | 2.1 | AT3G18030 | HAL3A protein                                              |
| 1492 | 261019_at   | 1014 | 1.0 | 0.9 | 1.0 | 1273 | 0.8 | 1.3 | 2.1 | AT1G26470 | expressed protein                                          |
| 1493 | 247346_at   | 204  | 0.8 | 1.0 | 0.7 | 156  | 1.0 | 1.3 | 2.1 | AT5G63770 | diacylglycerol kinase                                      |
| 1494 | 247833_at   | 531  | 0.9 | 1.0 | 1.0 | 465  | 1.2 | 1.6 | 2.1 | AT5G58575 | expressed protein                                          |
| 1495 | 247514_at   | 400  | 1.2 | 1.2 | 1.0 | 263  | 1.3 | 1.7 | 2.1 | AT5G61640 | peptide methionine sulfoxide reductase - like protein      |
| 1496 | 265207_at   | 206  | 1.2 | 1.2 | 0.9 | 193  | 1.1 | 1.4 | 2.1 | AT2G36680 | expressed protein                                          |
| 1497 | 257829_at   | 202  | 1.0 | 1.0 | 1.2 | 140  | 1.1 | 1.0 | 2.1 | AT3G26680 | expressed protein                                          |
| 1498 | 256976_at   | 225  | 1.1 | 1.3 | 0.8 | 146  | 1.0 | 1.3 | 2.1 | AT3G21020 | expressed protein                                          |
| 1499 | 262772_at   | 314  | 1.1 | 1.9 | 1.5 | 302  | 0.9 | 0.8 | 2.1 | AT1G13210 | haloacid dehalogenase-like hydrolase family                |
| 1500 | 249475_at   | 507  | 1.1 | 1.0 | 0.9 | 577  | 0.9 | 1.5 | 2.1 | AT5G38890 | expressed protein                                          |
| 1501 | 249175_at   | 723  | 1.0 | 0.9 | 0.8 | 748  | 0.9 | 1.3 | 2.1 | AT5G42970 | COP9 complex subunit, FUS4                                 |
| 1502 | 263145_at   | 341  | 1.0 | 1.1 | 1.1 | 251  | 1.3 | 1.4 | 2.1 | AT1G54090 | exocyst subunit EXO70 family                               |
| 1503 | 261692_at   | 871  | 0.8 | 0.9 | 1.0 | 847  | 0.9 | 1.1 | 2.1 | AT1G08450 | calreticulin 3 (CRT3)                                      |
| 1504 | 249835_s_at | 486  | 1.0 | 1.4 | 1.6 | 467  | 1.1 | 1.1 | 2.1 | AT5G23510 | hypothetical protein                                       |
| 1505 | 253963_at   | 123  | 1.2 | 1.4 | 1.5 | 155  | 1.0 | 0.9 | 2.1 | AT4G26470 | calcium-binding EF-hand family protein                     |
| 1506 | 249426_at   | 111  | 1.0 | 0.8 | 0.7 | 112  | 0.7 | 1.2 | 2.1 | AT5G39840 | ATP-dependent RNA helicase (mitochondrial), putative       |
| 1507 | 266924_at   | 689  | 1.2 | 1.0 | 0.9 | 584  | 1.1 | 1.4 | 2.1 | AT2G45730 | expressed protein                                          |
| 1508 | 256911_at   | 159  | 1.1 | 0.6 | 0.9 | 145  | 0.9 | 1.3 | 2.1 | AT3G24090 | glutamine:fructose-6-phosphate amidotransferase -related   |
| 1509 | 254723_at   | 828  | 1.2 | 1.8 | 2.0 | 1467 | 0.9 | 1.2 | 2.1 | AT4G13510 | ammonium transport protein (AMT1)                          |
| 1510 | 265035_at   | 671  | 1.2 | 1.2 | 1.0 | 569  | 0.9 | 1.2 | 2.1 | AT1G61620 | expressed protein                                          |
| 1511 | 261664_s_at | 179  | 0.9 | 0.8 | 0.9 | 229  | 1.0 | 2.0 | 2.1 | AT1G18320 | expressed protein                                          |
| 1512 | 248916_at   | 288  | 1.0 | 1.9 | 1.5 | 178  | 0.9 | 0.9 | 2.1 | AT5G45840 | leucine-rich repeat transmembrane protein kinase, putative |
| 1513 | 261524_at   | 348  | 1.0 | 0.9 | 1.0 | 376  | 0.8 | 1.3 | 2.1 | AT1G14300 | expressed protein                                          |
| 1514 | 259214_at   | 521  | 1.0 | 1.2 | 1.3 | 512  | 1.2 | 1.0 | 2.1 | AT3G09085 | expressed protein                                          |
| 1515 | 260331_at   | 634  | 1.0 | 0.9 | 0.8 | 790  | 0.9 | 1.5 | 2.1 | AT1G80270 | DNA binding protein, putative                              |
| 1516 | 252094_at   | 1357 | 1.0 | 1.0 | 1.0 | 1444 | 1.1 | 2.0 | 2.1 | AT3G51260 | 20S proteasome alpha subunit D (PAD1)                      |
| 1517 | 252450_s_at | 178  | 1.3 | 1.6 | 1.5 | 142  | 0.8 | 1.1 | 2.1 | AT3G47090 | leucine-rich repeat transmembrane protein kinase, putative |
| 1518 | 249239_at   | 1340 | 1.0 | 1.1 | 1.1 | 1289 | 1.0 | 1.2 | 2.1 | AT5G41990 | protein kinase family                                      |
| 1519 | 253490_at   | 476  | 1.1 | 1.1 | 1.0 | 521  | 0.9 | 1.3 | 2.1 | AT4G31790 | methyltransferase - like protein                           |
| 1520 | 266049_at   | 74   | 1.2 | 1.0 | 0.9 | 76   | 0.5 | 1.2 | 2.1 | AT2G40780 | translation initiation factor -related                     |
| 1521 | 250033_at   | 1343 | 1.0 | 1.3 | 1.3 | 1165 | 1.0 | 1.4 | 2.1 | AT5G18110 | eukaryotic cap-binding protein (gb AAC17220.1)             |

|             |           |      |     |     |     |      |     |     |     |           |                                                                        |
|-------------|-----------|------|-----|-----|-----|------|-----|-----|-----|-----------|------------------------------------------------------------------------|
| <b>1522</b> | 250792_at | 459  | 1.0 | 0.8 | 0.7 | 395  | 1.0 | 1.5 | 2.1 | AT5G05520 | expressed protein                                                      |
| <b>1523</b> | 257006_at | 127  | 1.2 | 1.2 | 1.1 | 136  | 1.2 | 1.5 | 2.1 | AT3G14075 | lipase (class 3) family                                                |
| <b>1524</b> | 250014_at | 894  | 1.0 | 1.3 | 1.4 | 1543 | 1.1 | 1.4 | 2.1 | AT5G17990 | anthranilate phosphoribosyltransferase                                 |
| <b>1525</b> | 256249_at | 399  | 1.0 | 0.9 | 1.0 | 395  | 1.2 | 2.2 | 2.1 | AT3G11270 | 26S proteasome regulatory subunit S12 (RPN8), putative                 |
| <b>1526</b> | 254434_at | 373  | 0.9 | 1.2 | 1.0 | 353  | 0.9 | 1.2 | 2.1 | AT4G20880 | ethylene-regulated transcript 2 (ERT2)                                 |
| <b>1527</b> | 265354_at | 408  | 1.2 | 1.4 | 1.6 | 458  | 1.0 | 1.1 | 2.1 | AT2G16700 | actin depolymerizing factor 5                                          |
| <b>1528</b> | 257713_at | 1874 | 1.5 | 1.7 | 1.3 | 1683 | 1.1 | 1.6 | 2.1 | AT3G27380 | succinate dehydrogenase, iron-sulphur subunit, mitochondrial (sdh2-1)  |
| <b>1529</b> | 260852_at | 1261 | 1.0 | 1.1 | 1.0 | 1261 | 1.0 | 1.4 | 2.1 | AT1G21900 | emp24/gp25L/p24 family                                                 |
| <b>1530</b> | 263184_at | 303  | 1.2 | 2.0 | 2.2 | 457  | 1.0 | 1.6 | 2.1 | AT1G05560 | UDP-glucose transferase(UGT1)                                          |
| <b>1531</b> | 250673_at | 118  | 1.2 | 1.6 | 1.8 | 108  | 1.4 | 1.0 | 2.1 | AT5G07070 | CBL-interacting protein kinase 2                                       |
| <b>1532</b> | 265691_at | 498  | 1.0 | 1.1 | 1.0 | 337  | 1.0 | 1.3 | 2.1 | AT2G24330 | expressed protein                                                      |
| <b>1533</b> | 253560_at | 478  | 1.0 | 0.8 | 0.7 | 424  | 0.9 | 1.6 | 2.1 | AT4G31160 | transducin / WD-40 repeat protein family                               |
| <b>1534</b> | 264787_at | 995  | 1.4 | 1.2 | 0.9 | 717  | 1.2 | 1.3 | 2.1 | AT2G17840 | senescence-associated protein 12 -related                              |
| <b>1535</b> | 254179_at | 440  | 1.0 | 0.9 | 0.8 | 410  | 1.0 | 1.2 | 2.1 | AT4G23910 | expressed protein                                                      |
| <b>1536</b> | 263208_at | 107  | 1.6 | 1.5 | 1.3 | 107  | 1.3 | 1.3 | 2.1 | AT1G10480 | C2H2-type zinc finger protein family                                   |
| <b>1537</b> | 261269_at | 300  | 1.0 | 1.0 | 0.8 | 299  | 1.0 | 1.3 | 2.1 | AT1G26690 | emp24/gp25L/p24 family                                                 |
| <b>1538</b> | 254169_at | 176  | 1.3 | 1.5 | 1.1 | 198  | 1.2 | 1.0 | 2.1 | AT4G24290 | expressed protein                                                      |
| <b>1539</b> | 264789_at | 1564 | 1.1 | 1.1 | 1.0 | 1497 | 1.0 | 1.1 | 2.1 | AT2G17870 | glycine-rich, zinc-finger DNA-binding protein -related                 |
| <b>1540</b> | 254076_at | 551  | 1.0 | 1.0 | 0.8 | 722  | 0.8 | 1.5 | 2.1 | AT4G25340 | immunophilin / FKBP-type peptidyl-prolyl cis-trans isomerase - related |
| <b>1541</b> | 256169_at | 231  | 1.2 | 1.0 | 1.0 | 180  | 1.0 | 0.9 | 2.1 | AT1G51800 | leucine rich repeat protein kinase, putative                           |
| <b>1542</b> | 260200_at | 375  | 1.1 | 1.0 | 0.8 | 425  | 1.0 | 1.3 | 2.1 | AT1G67620 | expressed protein                                                      |
| <b>1543</b> | 253783_at | 805  | 1.1 | 1.0 | 0.7 | 615  | 0.9 | 1.2 | 2.1 | AT4G28600 | calmodulin-binding protein                                             |
| <b>1544</b> | 262367_at | 1614 | 1.0 | 1.2 | 1.5 | 1252 | 1.1 | 1.2 | 2.1 | AT1G73030 | developmental protein DG1118 -related                                  |
| <b>1545</b> | 252133_at | 347  | 1.1 | 1.1 | 1.0 | 256  | 1.0 | 1.0 | 2.1 | AT3G50900 | expressed protein                                                      |
| <b>1546</b> | 266685_at | 237  | 1.3 | 1.5 | 1.4 | 227  | 1.1 | 0.9 | 2.1 | AT2G19710 | hypothetical protein                                                   |
| <b>1547</b> | 251411_at | 709  | 1.0 | 1.1 | 1.1 | 567  | 1.0 | 1.2 | 2.1 | AT3G60250 | casein kinase II beta chain, putative                                  |
| <b>1548</b> | 266348_at | 1287 | 1.1 | 2.0 | 2.2 | 1159 | 1.1 | 1.1 | 2.1 | AT2G01450 | mitogen-activated protein kinase (MAPK), putative (MPK17)              |
| <b>1549</b> | 246061_at | 337  | 0.9 | 0.7 | 0.7 | 257  | 1.3 | 1.6 | 2.1 | AT5G19320 | RAN GTPase activating protein 2                                        |
| <b>1550</b> | 257978_at | 53   | 0.8 | 1.3 | 1.3 | 78   | 0.9 | 1.1 | 2.1 | AT3G20860 | protein kinase family                                                  |
| <b>1551</b> | 248250_at | 723  | 1.1 | 1.8 | 1.5 | 538  | 1.0 | 1.1 | 2.1 | AT5G53130 | cyclic nucleotide-regulated ion channel (CNGC1)                        |
| <b>1552</b> | 254211_at | 698  | 1.3 | 1.4 | 1.5 | 392  | 0.8 | 1.0 | 2.1 | AT4G23570 | phosphatase - related                                                  |
| <b>1553</b> | 260268_at | 1969 | 1.2 | 1.1 | 1.0 | 1303 | 1.1 | 1.3 | 2.1 | AT1G68490 | expressed protein                                                      |
| <b>1554</b> | 266903_at | 284  | 1.0 | 0.8 | 0.8 | 268  | 0.7 | 1.4 | 2.1 | AT2G34570 | expressed protein                                                      |
| <b>1555</b> | 249943_at | 389  | 1.1 | 0.9 | 1.2 | 349  | 0.8 | 1.2 | 2.1 | AT5G22280 | expressed protein                                                      |
| <b>1556</b> | 254788_at | 969  | 1.2 | 1.5 | 1.6 | 948  | 1.0 | 1.1 | 2.1 | AT4G12790 | expressed protein                                                      |
| <b>1557</b> | 265093_at | 130  | 2.0 | 2.2 | 1.4 | 123  | 1.1 | 1.2 | 2.1 | AT1G03905 | ABC transporter family protein                                         |

|             |           |      |     |     |     |      |     |     |     |           |                                                      |
|-------------|-----------|------|-----|-----|-----|------|-----|-----|-----|-----------|------------------------------------------------------|
| <b>1558</b> | 258615_at | 970  | 1.0 | 0.9 | 0.9 | 991  | 1.1 | 1.4 | 2.1 | AT3G02740 | aspartyl protease -related                           |
| <b>1559</b> | 265373_at | 112  | 1.1 | 1.1 | 1.0 | 97   | 1.3 | 1.5 | 2.1 | AT2G06510 | replication protein, putative                        |
| <b>1560</b> | 255171_at | 287  | 1.0 | 0.9 | 0.7 | 306  | 1.1 | 1.9 | 2.1 | AT4G07990 | DnaJ protein family                                  |
| <b>1561</b> | 251760_at | 237  | 0.9 | 0.9 | 1.0 | 290  | 1.0 | 1.5 | 2.1 | AT3G55605 | expressed protein                                    |
| <b>1562</b> | 264624_at | 3474 | 1.4 | 1.8 | 1.6 | 1792 | 1.0 | 1.4 | 2.1 | AT1G08930 | ERD6 protein                                         |
| <b>1563</b> | 247009_at | 2037 | 1.0 | 1.0 | 1.0 | 2527 | 1.0 | 1.2 | 2.1 | AT5G67600 | expressed protein                                    |
| <b>1564</b> | 262237_at | 731  | 1.6 | 2.1 | 2.4 | 712  | 1.0 | 1.2 | 2.1 | AT1G48320 | thioesterase family                                  |
| <b>1565</b> | 254605_at | 444  | 1.1 | 1.3 | 1.2 | 372  | 1.0 | 1.1 | 2.1 | AT4G18950 | protein kinase - like protein                        |
| <b>1566</b> | 249719_at | 3414 | 1.0 | 1.6 | 1.7 | 2666 | 0.8 | 0.9 | 2.1 | AT5G35735 | auxin-induced protein family                         |
| <b>1567</b> | 255429_at | 336  | 1.3 | 1.4 | 1.2 | 272  | 1.2 | 1.8 | 2.1 | AT4G03410 | expressed protein                                    |
| <b>1568</b> | 263355_at | 294  | 1.1 | 1.3 | 0.8 | 148  | 1.1 | 1.5 | 2.1 | AT2G22100 | RRM-containing RNA-binding protein                   |
| <b>1569</b> | 247498_at | 605  | 1.0 | 0.9 | 0.7 | 423  | 1.0 | 1.3 | 2.1 | AT5G61810 | mitochondrial carrier protein family                 |
| <b>1570</b> | 256637_at | 780  | 1.0 | 1.0 | 1.0 | 586  | 0.9 | 1.1 | 2.1 | AT3G12030 | expressed protein                                    |
| <b>1571</b> | 266659_at | 275  | 1.1 | 1.3 | 1.5 | 286  | 1.1 | 1.2 | 2.1 | AT2G25850 | poly(A) polymerase -related                          |
| <b>1572</b> | 251657_at | 864  | 1.0 | 1.1 | 0.8 | 927  | 0.9 | 1.4 | 2.1 | AT3G57000 | expressed protein                                    |
| <b>1573</b> | 258164_at | 289  | 1.1 | 1.0 | 0.8 | 301  | 0.9 | 1.2 | 2.1 | AT3G17910 | surfeit 1                                            |
| <b>1574</b> | 259597_at | 402  | 0.9 | 0.9 | 0.9 | 302  | 1.2 | 1.7 | 2.1 | AT1G27900 | RNA helicase, putative                               |
| <b>1575</b> | 257291_at | 323  | 0.9 | 0.9 | 1.0 | 415  | 0.8 | 1.4 | 2.1 | AT3G15590 | DNA-binding protein, putative                        |
| <b>1576</b> | 246653_at | 1009 | 1.1 | 1.2 | 0.9 | 911  | 1.2 | 1.2 | 2.1 | AT5G35200 | expressed protein                                    |
| <b>1577</b> | 259055_at | 310  | 1.2 | 1.1 | 1.1 | 351  | 0.9 | 1.5 | 2.1 | AT3G03340 | expressed protein                                    |
| <b>1578</b> | 245734_at | 706  | 1.3 | 1.0 | 1.1 | 187  | 1.2 | 1.3 | 2.1 | AT1G73480 | hydrolase, alpha/beta fold family                    |
| <b>1579</b> | 266609_at | 608  | 1.0 | 0.9 | 0.8 | 535  | 1.0 | 1.2 | 2.1 | AT2G35510 | expressed protein                                    |
| <b>1580</b> | 257621_at | 479  | 1.0 | 1.1 | 0.8 | 366  | 1.1 | 1.2 | 2.1 | AT3G20410 | calcium-dependent protein kinase 9 (CDPK)(CPK9)      |
| <b>1581</b> | 267052_at | 402  | 1.2 | 1.2 | 1.2 | 376  | 1.0 | 1.1 | 2.1 | AT2G38410 | expressed protein                                    |
| <b>1582</b> | 248000_at | 603  | 1.2 | 1.1 | 0.9 | 446  | 1.1 | 1.4 | 2.1 | AT5G56190 | WD-40 repeat protein family                          |
| <b>1583</b> | 267199_at | 294  | 1.1 | 1.2 | 1.3 | 251  | 1.1 | 1.2 | 2.1 | AT2G30990 | hypothetical protein                                 |
| <b>1584</b> | 259278_at | 201  | 1.2 | 1.0 | 0.8 | 252  | 0.9 | 1.6 | 2.1 | AT3G01160 | expressed protein                                    |
| <b>1585</b> | 247454_at | 582  | 1.1 | 0.8 | 0.7 | 477  | 0.8 | 1.3 | 2.1 | AT5G62440 | expressed protein                                    |
| <b>1586</b> | 246139_at | 454  | 1.1 | 1.3 | 1.1 | 422  | 0.9 | 0.9 | 2.1 | AT5G19900 | expressed protein                                    |
| <b>1587</b> | 255116_at | 1398 | 1.1 | 1.1 | 0.9 | 1108 | 0.9 | 0.9 | 2.1 | AT4G08850 | receptor protein kinase-related protein              |
| <b>1588</b> | 246453_at | 1029 | 1.0 | 1.3 | 1.1 | 751  | 1.1 | 1.2 | 2.1 | AT5G16830 | syntaxin of plants SYP21 (PEP12)                     |
| <b>1589</b> | 245063_at | 344  | 1.1 | 0.8 | 0.8 | 376  | 0.7 | 1.8 | 2.1 | AT2G39795 | expressed protein                                    |
| <b>1590</b> | 252421_at | 471  | 1.1 | 1.1 | 1.6 | 702  | 0.8 | 0.7 | 2.1 | AT3G47540 | glycosyl hydrolase family 19 (chitinase)             |
| <b>1591</b> | 253167_at | 1327 | 1.2 | 1.2 | 1.2 | 1217 | 1.0 | 1.1 | 2.1 | AT4G35310 | calcium-dependent protein kinase, putative (CDPK)    |
| <b>1592</b> | 251242_at | 1344 | 1.0 | 0.8 | 0.8 | 1122 | 0.9 | 1.4 | 2.1 | AT3G61860 | arginine/serine-rich splicing factor, atRSp31        |
| <b>1593</b> | 247540_at | 394  | 0.8 | 0.9 | 0.8 | 252  | 1.2 | 2.8 | 2.1 | AT5G61590 | ethylene responsive element binding factor, putative |
| <b>1594</b> | 253027_at | 354  | 1.1 | 1.1 | 1.0 | 396  | 0.9 | 1.5 | 2.1 | AT4G38150 | pentatricopeptide (PPR) repeat-containing protein    |

|             |             |      |     |     |     |      |     |     |     |           |                                                         |
|-------------|-------------|------|-----|-----|-----|------|-----|-----|-----|-----------|---------------------------------------------------------|
| <b>1595</b> | 259706_at   | 422  | 0.8 | 0.9 | 1.4 | 505  | 1.2 | 1.7 | 2.1 | AT1G77540 | expressed protein                                       |
| <b>1596</b> | 260273_at   | 167  | 1.2 | 1.6 | 1.3 | 176  | 1.1 | 1.2 | 2.1 | AT1G80550 | pentatricopeptide (PPR) repeat-containing protein       |
| <b>1597</b> | 249672_at   | 503  | 0.9 | 0.7 | 0.7 | 415  | 1.2 | 1.6 | 2.1 | AT5G35910 | nucleolar protein-related                               |
| <b>1598</b> | 261378_at   | 282  | 1.1 | 1.4 | 1.3 | 261  | 0.8 | 1.0 | 2.1 | AT1G18890 | calcium-dependent protein kinase (CDPK1)                |
| <b>1599</b> | 247679_at   | 2636 | 1.0 | 1.3 | 1.4 | 2216 | 1.2 | 1.3 | 2.1 | AT5G59540 | oxidoreductase, 2OG-Fe(II) oxygenase family             |
| <b>1600</b> | 263082_at   | 271  | 1.2 | 1.3 | 1.0 | 326  | 0.9 | 1.0 | 2.1 | AT2G27200 | nucleotide-binding protein -related                     |
| <b>1601</b> | 247426_at   | 488  | 0.8 | 2.2 | 2.1 | 331  | 0.8 | 1.0 | 2.1 | AT5G62570 | calmodulin-binding protein                              |
| <b>1602</b> | 264921_at   | 280  | 1.1 | 1.1 | 0.8 | 248  | 0.7 | 1.4 | 2.1 | AT1G60650 | glycine-rich RNA-binding protein, putative              |
| <b>1603</b> | 249941_at   | 912  | 1.0 | 1.4 | 2.0 | 667  | 0.9 | 0.8 | 2.1 | AT5G22270 | expressed protein                                       |
| <b>1604</b> | 245521_at   | 389  | 0.9 | 0.8 | 0.7 | 304  | 1.2 | 1.6 | 2.1 | AT4G15880 | Ulp1 protease family                                    |
| <b>1605</b> | 266290_at   | 445  | 1.5 | 2.7 | 2.0 | 413  | 1.0 | 1.8 | 2.1 | AT2G29490 | glutathione transferase, putative                       |
| <b>1606</b> | 258214_at   | 298  | 1.4 | 0.9 | 0.5 | 175  | 1.1 | 2.0 | 2.1 | AT3G17970 | chloroplast outer membrane translocon subunit, putative |
| <b>1607</b> | 254387_at   | 2181 | 1.0 | 1.2 | 1.5 | 1913 | 0.8 | 0.8 | 2.1 | AT4G21850 | expressed protein                                       |
| <b>1608</b> | 253542_at   | 196  | 1.3 | 1.0 | 1.1 | 201  | 0.9 | 1.4 | 2.1 | AT4G31670 | expressed protein                                       |
| <b>1609</b> | 259562_at   | 123  | 1.1 | 1.1 | 1.0 | 83   | 1.4 | 1.5 | 2.1 | AT1G21200 | expressed protein                                       |
| <b>1610</b> | 249050_at   | 653  | 1.2 | 1.1 | 1.1 | 464  | 0.9 | 1.0 | 2.1 | AT5G44290 | cyclin-dependent protein kinase-related protein         |
| <b>1611</b> | 248036_at   | 675  | 1.0 | 0.9 | 0.7 | 701  | 0.8 | 1.5 | 2.1 | AT5G55920 | nucleolar protein-related                               |
| <b>1612</b> | 264835_at   | 275  | 0.9 | 1.2 | 0.9 | 203  | 1.1 | 1.4 | 2.1 | AT1G03550 | expressed protein                                       |
| <b>1613</b> | 252754_at   | 329  | 1.0 | 1.0 | 0.7 | 291  | 0.9 | 1.3 | 2.1 | AT3G43510 | expressed protein                                       |
| <b>1614</b> | 260842_at   | 2938 | 1.0 | 1.0 | 0.9 | 2524 | 1.1 | 1.6 | 2.1 | AT1G29150 | 26S proteasome regulatory subunit (RPN6), putative      |
| <b>1615</b> | 262932_at   | 4053 | 1.1 | 1.3 | 1.2 | 3778 | 1.1 | 1.6 | 2.1 | AT1G65820 | microsomal glutathione s-transferase, putative          |
| <b>1616</b> | 265385_at   | 339  | 1.2 | 1.4 | 1.2 | 429  | 1.0 | 1.1 | 2.1 | AT2G20900 | diacylglycerol kinase -related                          |
| <b>1617</b> | 256529_at   | 219  | 1.2 | 1.1 | 0.9 | 177  | 1.1 | 1.1 | 2.1 | AT1G33260 | protein kinase family                                   |
| <b>1618</b> | 262746_at   | 252  | 1.0 | 1.2 | 1.1 | 197  | 1.4 | 1.4 | 2.1 | AT1G28960 | MutT/nudix family protein                               |
| <b>1619</b> | 245401_at   | 373  | 1.0 | 0.8 | 0.6 | 349  | 1.2 | 1.3 | 2.1 | AT4G17670 | senescence-associated protein -related                  |
| <b>1620</b> | 257703_at   | 492  | 1.0 | 1.1 | 1.1 | 403  | 1.1 | 1.3 | 2.1 | AT3G12640 | RNA recognition motif (RRM) - containing protein        |
| <b>1621</b> | 257785_at   | 133  | 1.5 | 2.4 | 2.9 | 216  | 1.0 | 0.9 | 2.1 | AT3G26980 | ubiquitin family                                        |
| <b>1622</b> | 250539_at   | 1138 | 1.2 | 1.2 | 1.1 | 891  | 1.0 | 1.3 | 2.1 | AT5G08560 | transducin / WD-40 repeat protein family                |
| <b>1623</b> | 266855_at   | 606  | 0.9 | 1.0 | 1.1 | 499  | 0.9 | 1.3 | 2.1 | AT2G26920 | expressed protein                                       |
| <b>1624</b> | 267312_at   | 1383 | 1.1 | 0.9 | 0.9 | 1287 | 0.8 | 1.5 | 2.1 | AT2G34750 | expressed protein                                       |
| <b>1625</b> | 253992_at   | 225  | 1.2 | 1.3 | 1.2 | 280  | 0.8 | 0.9 | 2.1 | AT4G26060 | expressed protein                                       |
| <b>1626</b> | 253647_at   | 480  | 1.6 | 1.7 | 1.5 | 457  | 0.9 | 0.9 | 2.1 | AT4G29950 | microtubule-associated protein                          |
| <b>1627</b> | 262374_s_at | 686  | 1.6 | 3.2 | 4.0 | 846  | 1.1 | 1.2 | 2.1 | AT1G72930 | disease resistance protein (TIR class), putative        |
| <b>1628</b> | 246749_at   | 316  | 1.1 | 1.0 | 1.3 | 333  | 0.9 | 1.1 | 2.1 | AT5G27830 | expressed protein                                       |
| <b>1629</b> | 255544_at   | 274  | 1.2 | 1.1 | 0.9 | 241  | 1.0 | 1.4 | 2.1 | AT4G01880 | expressed protein                                       |
| <b>1630</b> | 258855_at   | 259  | 1.2 | 1.8 | 2.4 | 252  | 0.9 | 1.0 | 2.1 | AT3G02070 | expressed protein                                       |
| <b>1631</b> | 256683_at   | 1179 | 1.1 | 1.1 | 1.2 | 1073 | 1.0 | 1.2 | 2.1 | AT3G52220 | expressed protein                                       |

|             |             |       |     |     |     |      |     |     |     |           |                                                                                                                         |
|-------------|-------------|-------|-----|-----|-----|------|-----|-----|-----|-----------|-------------------------------------------------------------------------------------------------------------------------|
| <b>1632</b> | 258063_at   | 234   | 1.2 | 1.2 | 1.5 | 260  | 1.4 | 1.4 | 2.1 | AT3G14620 | cytochrome P450, putative                                                                                               |
| <b>1633</b> | 245684_at   | 942   | 1.1 | 1.1 | 1.2 | 798  | 1.0 | 1.2 | 2.1 | AT5G22000 | C3HC4-type zinc finger protein family                                                                                   |
| <b>1634</b> | 265703_at   | 302   | 0.9 | 1.0 | 1.0 | 295  | 1.0 | 1.8 | 2.1 | AT2G03430 | ankyrin -related                                                                                                        |
| <b>1635</b> | 263564_s_at | 481   | 1.0 | 1.0 | 0.8 | 373  | 1.1 | 1.2 | 2.1 | AT2G15400 | DNA-directed RNA polymerase II, third largest subunit                                                                   |
| <b>1636</b> | 256238_at   | 541   | 1.2 | 1.4 | 1.6 | 425  | 1.1 | 1.3 | 2.1 | AT3G12400 | expressed protein                                                                                                       |
| <b>1637</b> | 247271_at   | 2091  | 1.1 | 0.9 | 0.8 | 1610 | 1.0 | 1.4 | 2.1 | AT5G64270 | splicing factor, putative                                                                                               |
| <b>1638</b> | 259948_at   | 306   | 0.9 | 1.0 | 1.0 | 277  | 1.1 | 1.6 | 2.1 | AT1G71350 | expressed protein                                                                                                       |
| <b>1639</b> | 247849_at   | 392   | 1.2 | 1.0 | 0.9 | 313  | 1.1 | 1.5 | 2.1 | AT5G58130 | RRM-containing protein                                                                                                  |
| <b>1640</b> | 265999_at   | 225   | 1.5 | 1.7 | 1.4 | 175  | 0.9 | 1.4 | 2.1 | AT2G24100 | expressed protein                                                                                                       |
| <b>1641</b> | 264107_s_at | 360   | 1.2 | 1.6 | 1.6 | 407  | 0.8 | 0.8 | 2.1 | AT2G13790 | leucine-rich repeat protein kinase family                                                                               |
| <b>1642</b> | 256502_at   | 2057  | 1.1 | 0.9 | 0.8 | 1617 | 0.9 | 1.4 | 2.0 | AT1G36730 | Eukaryotic translation initiation factor 5 -related                                                                     |
| <b>1643</b> | 262716_at   | 1383  | 0.9 | 1.0 | 1.0 | 1459 | 1.1 | 1.6 | 2.0 | AT1G16470 | 20S proteasome alpha subunit B (PAB1)                                                                                   |
| <b>1644</b> | 255586_at   | 1198  | 1.1 | 1.0 | 0.7 | 1127 | 0.8 | 1.4 | 2.0 | AT4G01560 | expressed protein                                                                                                       |
| <b>1645</b> | 260981_at   | 352   | 1.0 | 1.0 | 1.1 | 361  | 1.1 | 1.6 | 2.0 | AT1G53460 | expressed protein                                                                                                       |
| <b>1646</b> | 262574_at   | 218   | 0.9 | 1.0 | 1.0 | 284  | 0.7 | 0.9 | 2.0 | AT1G15230 | expressed protein                                                                                                       |
| <b>1647</b> | 246917_at   | 369   | 1.1 | 1.4 | 1.4 | 478  | 1.0 | 1.5 | 2.0 | AT5G25280 | serine-rich protein                                                                                                     |
| <b>1648</b> | 261818_at   | 289   | 1.6 | 1.4 | 0.9 | 193  | 0.9 | 1.0 | 2.0 | AT1G11390 | hypothetical 62.8 KD protein in SSE1-CAR1 intergenic region sp Q02981; similar to ESTs gb AI998535, emb F15402 -related |
| <b>1649</b> | 263015_at   | 452   | 0.9 | 0.9 | 0.6 | 377  | 1.2 | 1.3 | 2.0 | AT1G23430 | expressed protein                                                                                                       |
| <b>1650</b> | 267002_s_at | 21945 | 1.1 | 1.0 | 1.2 | 5295 | 1.0 | 1.2 | 2.0 | AT2G34430 | photosystem II type I chlorophyll a /b binding protein                                                                  |
| <b>1651</b> | 250385_at   | 2424  | 1.0 | 0.8 | 0.8 | 1677 | 1.1 | 1.4 | 2.0 | AT5G11520 | aspartate aminotransferase, chloroplast (transaminase A/Asp3)                                                           |
| <b>1652</b> | 254615_at   | 1422  | 1.0 | 1.0 | 0.9 | 1525 | 0.9 | 1.7 | 2.0 | AT4G19210 | RNase L inhibitor protein, putative                                                                                     |
| <b>1653</b> | 254804_at   | 2836  | 1.2 | 1.2 | 1.1 | 1176 | 1.0 | 1.5 | 2.0 | AT4G13010 | oxidoreductase, zinc-binding dehydrogenase family                                                                       |
| <b>1654</b> | 249936_at   | 428   | 1.3 | 1.1 | 1.2 | 348  | 1.5 | 1.4 | 2.0 | AT5G22450 | expressed protein                                                                                                       |
| <b>1655</b> | 250518_at   | 329   | 1.1 | 1.3 | 1.2 | 306  | 0.9 | 1.1 | 2.0 | AT5G08139 | C3HC4-type zinc finger protein family                                                                                   |
| <b>1656</b> | 246559_at   | 459   | 1.1 | 0.9 | 1.1 | 507  | 1.0 | 1.4 | 2.0 | AT5G15550 | transducin / WD-40 repeat protein family                                                                                |
| <b>1657</b> | 261447_at   | 99    | 1.2 | 1.1 | 1.0 | 76   | 1.3 | 1.4 | 2.0 | AT1G21160 | translation initiation factor eIF-2, putative                                                                           |
| <b>1658</b> | 255441_at   | 2113  | 1.0 | 0.9 | 0.9 | 1906 | 1.1 | 1.5 | 2.0 | AT4G02570 | cullin 1 protein -related                                                                                               |
| <b>1659</b> | 253292_at   | 198   | 1.0 | 2.0 | 3.6 | 234  | 1.0 | 1.0 | 2.0 | AT4G33985 | expressed protein                                                                                                       |
| <b>1660</b> | 255512_at   | 199   | 1.2 | 1.4 | 1.5 | 190  | 0.9 | 1.1 | 2.0 | AT4G02195 | syntaxin of plants SYP42 (TLG2b)                                                                                        |
| <b>1661</b> | 248452_at   | 876   | 1.0 | 0.9 | 0.7 | 948  | 0.8 | 1.2 | 2.0 | AT5G51300 | splicing factor 1 (SF1), putative                                                                                       |
| <b>1662</b> | 256232_at   | 666   | 1.0 | 0.9 | 0.9 | 435  | 1.1 | 1.2 | 2.0 | AT3G12570 | expressed protein                                                                                                       |
| <b>1663</b> | 253991_at   | 355   | 1.1 | 1.3 | 1.1 | 325  | 1.0 | 1.3 | 2.0 | AT4G26000 | KH domain protein                                                                                                       |
| <b>1664</b> | 261376_at   | 1454  | 1.8 | 1.5 | 0.9 | 989  | 1.1 | 1.6 | 2.0 | AT1G18660 | RING finger protein family                                                                                              |
| <b>1665</b> | 267062_at   | 698   | 1.1 | 1.1 | 1.0 | 552  | 1.0 | 1.5 | 2.0 | AT2G32600 | spliceosome associated protein-family                                                                                   |
| <b>1666</b> | 261011_at   | 233   | 1.1 | 1.2 | 1.0 | 244  | 0.8 | 1.3 | 2.0 | AT1G26340 | cytochrome b5, putative                                                                                                 |

|             |             |      |     |     |     |      |     |     |     |           |                                                                                  |
|-------------|-------------|------|-----|-----|-----|------|-----|-----|-----|-----------|----------------------------------------------------------------------------------|
| <b>1667</b> | 245934_at   | 888  | 1.1 | 1.1 | 1.0 | 798  | 1.0 | 1.4 | 2.0 | AT5G09330 | expressed protein                                                                |
| <b>1668</b> | 259747_at   | 189  | 1.3 | 0.9 | 1.0 | 199  | 1.0 | 1.0 | 2.0 | AT1G71170 | dehydrogenase -related                                                           |
| <b>1669</b> | 245363_at   | 67   | 1.5 | 2.3 | 2.6 | 101  | 1.3 | 1.0 | 2.0 | AT4G15120 | expressed protein                                                                |
| <b>1670</b> | 253603_at   | 356  | 1.0 | 1.0 | 0.8 | 324  | 1.1 | 1.5 | 2.0 | AT4G30935 | WRKY family transcription factor                                                 |
| <b>1671</b> | 249315_at   | 863  | 1.1 | 0.8 | 0.7 | 744  | 0.8 | 1.4 | 2.0 | AT5G41190 | hypothetical protein                                                             |
| <b>1672</b> | 250222_at   | 738  | 1.0 | 0.9 | 0.7 | 633  | 0.8 | 1.3 | 2.0 | AT5G14050 | transducin / WD-40 repeat protein family                                         |
| <b>1673</b> | 251773_at   | 1219 | 1.2 | 1.6 | 1.9 | 874  | 1.0 | 1.2 | 2.0 | AT3G55960 | expressed protein                                                                |
| <b>1674</b> | 247792_at   | 306  | 0.8 | 1.0 | 1.4 | 304  | 1.1 | 1.5 | 2.0 | AT5G58787 | C3HC4-type zinc finger protein family                                            |
| <b>1675</b> | 266932_s_at | 95   | 1.0 | 1.1 | 0.9 | 139  | 0.8 | 1.5 | 2.0 | AT2G07750 | DEAD box RNA helicase, putative                                                  |
| <b>1676</b> | 259311_at   | 699  | 1.2 | 0.8 | 1.0 | 771  | 0.9 | 1.5 | 2.0 | AT3G05060 | SAR DNA-binding protein, putative                                                |
| <b>1677</b> | 249326_at   | 96   | 1.2 | 0.8 | 1.0 | 81   | 1.3 | 1.5 | 2.0 | AT5G40840 | cohesion family protein (SYN2) (RAD21-1)                                         |
| <b>1678</b> | 265453_at   | 732  | 1.1 | 0.8 | 0.7 | 799  | 1.0 | 1.6 | 2.0 | AT2G46520 | cellular apoptosis susceptibility protein (importin-alpha re-exporter), putative |
| <b>1679</b> | 264286_at   | 341  | 1.0 | 0.9 | 0.9 | 316  | 1.0 | 1.3 | 2.0 | AT1G61870 | pentatricopeptide (PPR) repeat-containing protein                                |
| <b>1680</b> | 261872_s_at | 366  | 1.0 | 1.2 | 1.1 | 319  | 1.2 | 1.8 | 2.0 | AT1G11520 | hypthetical protein                                                              |
| <b>1681</b> | 258649_at   | 4647 | 1.1 | 0.9 | 1.0 | 4416 | 1.1 | 1.5 | 2.0 | AT3G09840 | transitional endoplasmic reticulum ATPase -related                               |
| <b>1682</b> | 260035_at   | 376  | 1.0 | 1.2 | 0.6 | 454  | 1.1 | 1.4 | 2.0 | AT1G68850 | peroxidase, putative                                                             |
| <b>1683</b> | 249307_s_at | 466  | 0.9 | 1.0 | 1.1 | 379  | 1.3 | 1.4 | 2.0 | AT5G41370 | TFIIH basal transcription factor complex helicase XPB subunit, putative          |
| <b>1684</b> | 264113_at   | 255  | 1.1 | 0.9 | 1.0 | 192  | 1.1 | 1.2 | 2.0 | AT2G31260 | (AtAPG9) autophagy 9 protein                                                     |
| <b>1685</b> | 260588_at   | 1193 | 1.0 | 1.0 | 1.1 | 865  | 0.9 | 1.1 | 2.0 | AT1G53320 | F-box containing tubby family protein                                            |
| <b>1686</b> | 248508_at   | 761  | 1.0 | 0.9 | 1.0 | 617  | 1.0 | 1.7 | 2.0 | AT5G50320 | GCN5-related N-acetyltransferase (GNAT) family                                   |
| <b>1687</b> | 265474_at   | 897  | 1.1 | 1.4 | 1.3 | 1494 | 0.8 | 1.6 | 2.0 | AT2G15690 | expressed protein                                                                |
| <b>1688</b> | 265953_at   | 957  | 1.1 | 1.2 | 1.3 | 838  | 1.0 | 1.3 | 2.0 | AT2G37480 | expressed protein                                                                |
| <b>1689</b> | 267442_at   | 901  | 0.8 | 0.9 | 0.8 | 712  | 1.3 | 1.6 | 2.0 | AT2G19080 | expressed protein                                                                |
| <b>1690</b> | 266847_at   | 786  | 0.9 | 1.0 | 1.0 | 782  | 1.0 | 1.5 | 2.0 | AT2G26060 | transducin / WD-40 repeat protein family                                         |
| <b>1691</b> | 260807_at   | 319  | 1.1 | 1.5 | 1.8 | 247  | 1.0 | 1.1 | 2.0 | AT1G78310 | proline-rich protein family                                                      |
| <b>1692</b> | 263457_at   | 326  | 0.9 | 1.2 | 1.3 | 237  | 1.3 | 1.4 | 2.0 | AT2G22300 | ethylene-induced calmodulin-binding protein, putative                            |
| <b>1693</b> | 246532_at   | 186  | 1.3 | 1.9 | 1.7 | 209  | 1.1 | 1.0 | 2.0 | AT5G15870 | glycosyl hydrolase family 81                                                     |
| <b>1694</b> | 261795_at   | 1044 | 1.0 | 1.2 | 1.1 | 847  | 1.1 | 1.4 | 2.0 | AT1G16010 | expressed protein                                                                |
| <b>1695</b> | 255296_at   | 110  | 1.1 | 1.4 | 1.2 | 114  | 1.4 | 1.5 | 2.0 | AT4G04790 | pentatricopeptide (PPR) repeat-containing protein                                |
| <b>1696</b> | 261955_at   | 1621 | 1.0 | 0.9 | 0.9 | 1839 | 1.0 | 1.8 | 2.0 | AT1G64520 | 26S proteasome regulatory subunit (RPN12), putative                              |
| <b>1697</b> | 250845_at   | 918  | 1.1 | 1.0 | 1.0 | 906  | 0.9 | 1.6 | 2.0 | AT5G04600 | RNA recognition motif (RRM) - containing protein                                 |
| <b>1698</b> | 250314_at   | 610  | 1.0 | 1.1 | 1.0 | 539  | 1.0 | 1.5 | 2.0 | AT5G12190 | RNA recognition motif (RRM) - containing protein                                 |
| <b>1699</b> | 262057_at   | 979  | 1.1 | 1.0 | 1.1 | 947  | 0.9 | 1.3 | 2.0 | AT1G80040 | expressed protein                                                                |
| <b>1700</b> | 260589_at   | 639  | 1.0 | 1.1 | 1.2 | 533  | 1.0 | 1.2 | 2.0 | AT1G53400 | expressed protein                                                                |
| <b>1701</b> | 256663_at   | 1489 | 1.0 | 0.9 | 0.8 | 1244 | 1.0 | 1.2 | 2.0 | AT3G12050 | expressed protein                                                                |
| <b>1702</b> | 246789_at   | 514  | 0.9 | 1.0 | 1.1 | 470  | 1.1 | 1.4 | 2.0 | AT5G27600 | AMP-binding protein, putative                                                    |

|             |             |      |     |     |     |      |     |     |     |           |                                                         |
|-------------|-------------|------|-----|-----|-----|------|-----|-----|-----|-----------|---------------------------------------------------------|
| <b>1703</b> | 249171_at   | 495  | 1.1 | 1.2 | 1.1 | 408  | 1.0 | 1.2 | 2.0 | AT5G42940 | expressed protein                                       |
| <b>1704</b> | 256233_at   | 457  | 1.2 | 1.9 | 2.0 | 519  | 1.2 | 1.0 | 2.0 | AT3G12360 | ankyrin repeat protein family                           |
| <b>1705</b> | 253687_at   | 603  | 0.6 | 0.5 | 0.6 | 584  | 1.0 | 1.5 | 2.0 | AT4G29520 | expressed protein                                       |
| <b>1706</b> | 255685_s_at | 473  | 0.9 | 1.0 | 0.9 | 421  | 0.9 | 1.9 | 2.0 | AT4G00600 | tetrahydrofolate dehydrogenase/cyclohydrolase, putative |
| <b>1707</b> | 253917_at   | 456  | 0.8 | 0.7 | 0.7 | 419  | 0.9 | 1.6 | 2.0 | AT4G27380 | expressed protein                                       |
| <b>1708</b> | 259126_at   | 190  | 1.0 | 0.9 | 0.8 | 140  | 1.0 | 1.3 | 2.0 | AT3G02280 | flavodoxin family                                       |
| <b>1709</b> | 250418_at   | 287  | 1.0 | 0.8 | 0.8 | 318  | 1.0 | 1.4 | 2.0 | AT5G11240 | transducin / WD-40 repeat protein family                |
| <b>1710</b> | 259440_at   | 3235 | 1.1 | 1.2 | 1.3 | 2750 | 1.1 | 1.1 | 2.0 | AT1G01550 | expressed protein                                       |
| <b>1711</b> | 251790_at   | 310  | 1.1 | 1.3 | 1.5 | 416  | 0.8 | 0.8 | 2.0 | AT3G55470 | C2 domain-containing protein                            |
| <b>1712</b> | 254850_at   | 195  | 1.5 | 2.0 | 1.4 | 235  | 0.9 | 1.1 | 2.0 | AT4G12000 | expressed protein                                       |
| <b>1713</b> | 267381_at   | 382  | 1.1 | 2.8 | 2.7 | 348  | 1.0 | 1.0 | 2.0 | AT2G26190 | expressed protein                                       |
| <b>1714</b> | 249019_at   | 161  | 1.2 | 1.2 | 1.0 | 175  | 1.1 | 1.3 | 2.0 | AT5G44780 | expressed protein                                       |
| <b>1715</b> | 254527_at   | 308  | 1.0 | 0.8 | 0.7 | 260  | 0.8 | 1.3 | 2.0 | AT4G19610 | RNA recognition motif (RRM) - containing protein        |
| <b>1716</b> | 261130_at   | 561  | 1.2 | 1.1 | 1.1 | 708  | 0.8 | 1.2 | 2.0 | AT1G04870 | protein arginine N-methyltransferase family             |

Fold induction for 305-1h is averaged from four independent ATH-1 array hybridizations, all others from two independent array hybridizations. Applied threshold is 2-fold. Annotation June 15, 2003.
