# Supplementary material
Source: PubMed Central journal article supplement (PMC337064)
Supplement: pnas_0308044100_12.pdf [file pnas_0308044100_12.pdf]

**Table 12. Quartz\_6hr\_decrease**

|           | Probe set   | Fold induction             |         |         |            | Fold induction             |         |         |            | Identifier |                                                                            |
|-----------|-------------|----------------------------|---------|---------|------------|----------------------------|---------|---------|------------|------------|----------------------------------------------------------------------------|
|           |             | Expression level (327, 1h) | 305, 1h | 295, 1h | quartz, 1h | Expression level (327, 1h) | 305, 6h | 295, 6h | quartz, 6h |            |                                                                            |
| <b>1</b>  | 259773_at   | 187                        | 0.6     | 0.3     | 0.4        | 86                         | 0.7     | 0.2     | 0.0        | AT1G29500  | auxin-induced (indole-3-acetic acid induced) protein, putative             |
| <b>2</b>  | 261157_at   | 186                        | 2.6     | 0.7     | 0.5        | 186                        | 1.4     | 0.5     | 0.0        | AT1G34510  | peroxidase, putative                                                       |
| <b>3</b>  | 254907_at   | 30                         | 1.7     | 0.6     | 0.4        | 291                        | 0.9     | 0.4     | 0.0        | AT4G11190  | disease resistance response protein family/ dirigent protein family        |
| <b>4</b>  | 246273_at   | 12                         | 2.2     | 0.6     | 2.0        | 215                        | 1.3     | 0.3     | 0.0        | AT4G36700  | cupin domain-containing protein                                            |
| <b>5</b>  | 254550_at   | 192                        | 0.4     | 0.3     | 0.2        | 1412                       | 0.7     | 0.1     | 0.0        | AT4G19690  | iron-regulated transporter (IRT1)                                          |
| <b>6</b>  | 259787_at   | 48                         | 0.9     | 0.6     | 0.8        | 20                         | 0.1     | 0.1     | 0.0        | AT1G29460  | auxin-induced (indole-3-acetic acid induced) protein, putative             |
| <b>7</b>  | 260241_at   | 47                         | 1.5     | 0.8     | 0.7        | 112                        | 1.0     | 0.7     | 0.0        | AT1G63710  | cytochrome P450, putative                                                  |
| <b>8</b>  | 267618_at   | 89                         | 0.8     | 0.9     | 0.8        | 104                        | 1.0     | 0.5     | 0.0        | AT2G26760  | cyclin, putative                                                           |
| <b>9</b>  | 248073_at   | 47                         | 0.8     | 0.8     | 0.6        | 89                         | 1.2     | 0.5     | 0.0        | AT5G55720  | polysaccharide lyase family 1 (pectate lyase)                              |
| <b>10</b> | 255460_at   | 134                        | 0.8     | 0.7     | 1.0        | 148                        | 0.9     | 0.4     | 0.0        | AT4G02800  | expressed protein                                                          |
| <b>11</b> | 259526_at   | 66                         | 1.8     | 0.6     | 0.4        | 76                         | 1.3     | 0.5     | 0.0        | AT1G12570  | glucose-methanol-choline (GMC) oxidoreductase family                       |
| <b>12</b> | 247814_at   | 350                        | 1.1     | 0.9     | 0.8        | 1593                       | 1.0     | 0.4     | 0.1        | AT5G58310  | hydrolase, alpha/beta fold family                                          |
| <b>13</b> | 247871_at   | 383                        | 0.6     | 0.6     | 0.3        | 384                        | 1.3     | 0.6     | 0.1        | AT5G57530  | xyloglucan endotransglycosylase, putative                                  |
| <b>14</b> | 259912_at   | 84                         | 0.8     | 0.7     | 1.1        | 87                         | 0.7     | 0.1     | 0.1        | AT1G72670  | expressed protein                                                          |
| <b>15</b> | 248526_at   | 268                        | 0.6     | 0.5     | 0.6        | 310                        | 0.8     | 0.3     | 0.1        | AT5G50730  | hypothetical protein                                                       |
| <b>16</b> | 265543_at   | 55                         | 0.6     | 1.3     | 1.5        | 93                         | 0.4     | 0.3     | 0.1        | AT2G28270  | CHP-rich zinc finger protein, putative                                     |
| <b>17</b> | 250228_at   | 189                        | 1.2     | 1.2     | 1.4        | 253                        | 0.9     | 0.4     | 0.1        | AT5G13840  | cell cycle switch protein                                                  |
| <b>18</b> | 252534_at   | 80                         | 0.7     | 0.3     | 1.0        | 94                         | 0.7     | 0.9     | 0.1        | AT3G46130  | Myb family transcription factor                                            |
| <b>19</b> | 259926_at   | 72                         | 1.3     | 0.6     | 0.6        | 155                        | 0.8     | 0.5     | 0.1        | AT1G75090  | DNA-3-methyladenine glycosylase I -related                                 |
| <b>20</b> | 261364_at   | 130                        | 1.1     | 0.9     | 1.3        | 123                        | 0.7     | 0.8     | 0.1        | AT1G53140  | expressed protein                                                          |
| <b>21</b> | 259813_at   | 259                        | 0.8     | 0.5     | 0.4        | 919                        | 0.7     | 0.4     | 0.1        | AT1G49860  | glutathione transferase, putative                                          |
| <b>22</b> | 247425_at   | 53                         | 2.8     | 1.0     | 0.6        | 67                         | 0.6     | 0.1     | 0.1        | AT5G62550  | expressed protein                                                          |
| <b>23</b> | 253736_at   | 550                        | 0.7     | 0.4     | 0.3        | 1043                       | 0.9     | 0.5     | 0.1        | AT4G28780  | GDSL-motif lipase/hydrolase protein                                        |
| <b>24</b> | 258765_at   | 161                        | 0.6     | 0.7     | 0.4        | 161                        | 1.6     | 0.9     | 0.1        | AT3G10710  | pectinesterase family                                                      |
| <b>25</b> | 266112_x_at | 60                         | 0.9     | 0.7     | 1.0        | 122                        | 0.7     | 0.6     | 0.1        | AT2G02210  | Ulp1 protease family                                                       |
| <b>26</b> | 249832_at   | 89                         | 1.2     | 0.2     | 0.4        | 85                         | 1.2     | 0.4     | 0.1        | AT5G23400  | disease resistance protein family (LRR)                                    |
| <b>27</b> | 246687_at   | 329                        | 0.9     | 0.8     | 0.3        | 767                        | 1.0     | 0.4     | 0.1        | AT5G33370  | GDSL-motif lipase/hydrolase protein                                        |
| <b>28</b> | 246603_at   | 99                         | 1.1     | 0.9     | 0.8        | 362                        | 0.8     | 0.3     | 0.1        | AT1G31690  | copper amine oxidase -related                                              |
| <b>29</b> | 256864_at   | 150                        | 1.1     | 0.8     | 1.5        | 183                        | 0.9     | 0.5     | 0.1        | AT3G23890  | DNA topoisomerase (ATP-hydrolyzing) (DNA topoisomerase II/DNA gyrase/TOP2) |
| <b>30</b> | 262260_at   | 2406                       | 1.0     | 0.9     | 0.5        | 3185                       | 1.0     | 0.3     | 0.1        | AT1G70850  | Bet v I allergen family                                                    |

|    |             |      |     |      |      |      |     |     |     |           |                                                                     |
|----|-------------|------|-----|------|------|------|-----|-----|-----|-----------|---------------------------------------------------------------------|
| 31 | 254233_at   | 654  | 0.9 | 0.6  | 0.8  | 708  | 0.8 | 0.3 | 0.1 | AT4G23800 | 98b like protein                                                    |
| 32 | 248807_at   | 393  | 1.0 | 0.8  | 1.0  | 849  | 0.8 | 0.4 | 0.1 | AT5G47500 | pectinesterase family                                               |
| 33 | 250980_at   | 27   | 8.1 | 14.5 | 15.3 | 109  | 1.0 | 0.4 | 0.1 | AT5G03130 | hypothetical protein                                                |
| 34 | 248729_at   | 69   | 1.4 | 1.4  | 0.8  | 377  | 1.4 | 0.7 | 0.1 | AT5G48010 | pentacyclic triterpene synthase (04C11) (ATPEN1), putative          |
| 35 | 266353_at   | 2170 | 1.1 | 1.0  | 0.9  | 2632 | 0.7 | 0.3 | 0.1 | AT2G01520 | major latex protein (MLP)-related                                   |
| 36 | 258367_at   | 114  | 0.4 | 0.7  | 0.9  | 157  | 0.8 | 0.4 | 0.1 | AT3G14370 | protein kinase family                                               |
| 37 | 251677_at   | 668  | 0.7 | 0.6  | 0.3  | 2560 | 1.3 | 0.3 | 0.1 | AT3G56980 | bHLH protein family                                                 |
| 38 | 264931_at   | 561  | 1.5 | 1.3  | 1.0  | 1734 | 1.2 | 0.6 | 0.1 | AT1G60590 | polygalacturonase, putative                                         |
| 39 | 245692_at   | 80   | 0.7 | 1.2  | 1.0  | 469  | 1.5 | 0.4 | 0.1 | AT5G04150 | bHLH protein family                                                 |
| 40 | 247914_at   | 361  | 0.5 | 0.4  | 0.3  | 372  | 1.4 | 0.9 | 0.1 | AT5G57540 | xyloglucan endotransglycosylase, putative                           |
| 41 | 250682_x_at | 2374 | 0.6 | 0.6  | 0.3  | 2253 | 1.1 | 0.5 | 0.1 | AT5G06630 | proline-rich protein family                                         |
| 42 | 259563_s_at | 74   | 1.2 | 1.4  | 1.2  | 125  | 0.9 | 0.6 | 0.1 | AT1G20590 | cyclin, putative                                                    |
| 43 | 246991_at   | 1159 | 0.7 | 0.6  | 0.4  | 1077 | 1.0 | 0.5 | 0.1 | AT5G67400 | peroxidase, putative                                                |
| 44 | 259549_at   | 69   | 1.1 | 0.2  | 0.8  | 144  | 1.1 | 0.5 | 0.1 | AT1G35290 | thioesterase-related                                                |
| 45 | 250968_at   | 444  | 0.7 | 0.4  | 0.4  | 551  | 1.0 | 0.4 | 0.1 | AT5G02890 | transferase family                                                  |
| 46 | 248527_at   | 134  | 0.9 | 0.5  | 0.7  | 118  | 0.8 | 0.6 | 0.1 | AT5G50740 | copper chaperone (CCH)-related                                      |
| 47 | 264014_at   | 970  | 0.8 | 0.6  | 0.4  | 1727 | 1.2 | 0.9 | 0.1 | AT2G21210 | auxin-induced (indole-3-acetic acid induced) protein, putative      |
| 48 | 246652_at   | 711  | 0.5 | 0.7  | 0.4  | 467  | 1.6 | 0.7 | 0.1 | AT5G35190 | proline-rich protein family                                         |
| 49 | 267636_at   | 124  | 1.0 | 0.8  | 0.7  | 111  | 1.3 | 0.3 | 0.1 | AT2G42110 | expressed protein                                                   |
| 50 | 258003_at   | 664  | 0.8 | 0.5  | 0.4  | 1033 | 1.0 | 0.6 | 0.1 | AT3G29030 | expansin, putative (EXP5)                                           |
| 51 | 246159_at   | 813  | 0.8 | 0.7  | 0.8  | 1265 | 1.0 | 0.6 | 0.1 | AT5G20935 | expressed protein                                                   |
| 52 | 245607_at   | 93   | 1.1 | 1.2  | 1.3  | 109  | 1.0 | 0.3 | 0.1 | AT4G14330 | kinesin-related protein                                             |
| 53 | 254820_s_at | 2225 | 0.9 | 0.7  | 0.5  | 2726 | 1.0 | 0.4 | 0.1 | AT4G12510 | protease inhibitor/seed storage/lipid transfer protein (LTP) family |
| 54 | 245555_at   | 1206 | 0.6 | 0.5  | 0.6  | 1965 | 1.0 | 0.5 | 0.2 | AT4G15390 | acyltransferase family                                              |
| 55 | 260547_at   | 2358 | 0.8 | 0.9  | 0.8  | 4402 | 0.9 | 0.4 | 0.2 | AT2G43550 | trypsin inhibitor -related                                          |
| 56 | 251395_at   | 3285 | 0.9 | 0.6  | 0.5  | 4193 | 0.9 | 0.5 | 0.2 | AT2G45470 | fasciclin-like arabinogalactan-protein (FLA8)                       |
| 57 | 248728_at   | 140  | 0.8 | 0.8  | 0.8  | 526  | 1.5 | 0.6 | 0.2 | AT5G48000 | cytochrome p450 family                                              |
| 58 | 252238_at   | 924  | 0.5 | 0.5  | 0.5  | 474  | 1.4 | 0.8 | 0.2 | AT3G49960 | peroxidase, putative                                                |
| 59 | 246797_at   | 101  | 0.8 | 0.7  | 0.6  | 197  | 0.8 | 0.4 | 0.2 | AT5G26790 | expressed protein                                                   |
| 60 | 256352_at   | 727  | 0.7 | 0.6  | 0.3  | 543  | 1.2 | 0.8 | 0.2 | AT1G54970 | proline-rich protein family                                         |
| 61 | 251226_at   | 2161 | 0.6 | 0.7  | 0.5  | 1785 | 1.3 | 0.6 | 0.2 | AT3G62680 | proline-rich protein family                                         |
| 62 | 262304_at   | 3357 | 1.0 | 0.9  | 0.5  | 5796 | 0.9 | 0.6 | 0.2 | AT1G70890 | major latex protein (MLP)-related                                   |
| 63 | 264341_at   | 87   | 0.8 | 0.5  | 0.8  | 80   | 0.7 | 0.9 | 0.2 | AT1G70270 | expressed protein                                                   |
| 64 | 261684_at   | 2113 | 0.7 | 0.5  | 0.2  | 4000 | 1.2 | 0.5 | 0.2 | AT1G47400 | hypothetical protein                                                |
| 65 | 258409_at   | 431  | 0.8 | 0.9  | 0.9  | 657  | 0.9 | 0.6 | 0.2 | AT3G17640 | leucine rich repeat protein family                                  |
| 66 | 254025_at   | 359  | 0.7 | 0.9  | 0.5  | 423  | 1.1 | 0.5 | 0.2 | AT4G25790 | pathogenesis-related protein, putative                              |
| 67 | 249659_s_at | 487  | 1.1 | 0.7  | 0.7  | 579  | 0.8 | 0.4 | 0.2 | AT5G36710 | expressed protein                                                   |

|     |             |      |     |     |     |      |     |     |     |           |                                                                     |
|-----|-------------|------|-----|-----|-----|------|-----|-----|-----|-----------|---------------------------------------------------------------------|
| 68  | 254909_at   | 87   | 0.9 | 0.6 | 0.7 | 119  | 1.3 | 0.5 | 0.2 | AT4G11210 | disease resistance response protein family/ dirigent protein family |
| 69  | 251292_at   | 195  | 0.9 | 0.7 | 0.2 | 653  | 1.0 | 0.6 | 0.2 | AT3G61920 | expressed protein                                                   |
| 70  | 263133_at   | 163  | 0.7 | 0.7 | 0.6 | 237  | 0.9 | 0.6 | 0.2 | AT1G78450 | expressed protein                                                   |
| 71  | 258143_at   | 74   | 0.7 | 0.6 | 0.4 | 126  | 1.1 | 0.6 | 0.2 | AT3G18170 | expressed protein                                                   |
| 72  | 254024_at   | 407  | 0.7 | 0.7 | 0.4 | 843  | 0.9 | 0.7 | 0.2 | AT4G25780 | pathogenesis-related protein, putative                              |
| 73  | 258421_at   | 432  | 0.8 | 0.7 | 0.4 | 424  | 1.1 | 0.7 | 0.2 | AT3G16690 | nodulin MtN3 family protein                                         |
| 74  | 250744_at   | 87   | 0.7 | 0.4 | 0.2 | 126  | 0.8 | 0.3 | 0.2 | AT5G05840 | hypothetical protein                                                |
| 75  | 254235_at   | 333  | 1.0 | 0.6 | 0.4 | 286  | 0.9 | 0.5 | 0.2 | AT4G23750 | AP2 domain transcription factor, putative                           |
| 76  | 259391_s_at | 544  | 0.9 | 0.6 | 0.4 | 545  | 0.9 | 0.5 | 0.2 | AT1G06350 | fatty acid desaturase family protein                                |
| 77  | 254534_at   | 152  | 0.5 | 0.7 | 0.4 | 211  | 1.0 | 0.5 | 0.2 | AT4G19680 | iron-regulated transporter (IRT2)                                   |
| 78  | 263495_at   | 424  | 1.6 | 1.8 | 1.0 | 2183 | 0.8 | 0.5 | 0.2 | AT2G42530 | cold-regulated protein (cor15b)                                     |
| 79  | 250386_at   | 137  | 1.0 | 1.0 | 1.1 | 208  | 0.7 | 0.4 | 0.2 | AT5G11510 | myb family transcription factor (MYB3R4)                            |
| 80  | 259790_s_at | 384  | 0.5 | 0.3 | 0.4 | 105  | 0.8 | 0.5 | 0.2 | AT1G29430 | auxin-induced (indole-3-acetic acid induced) protein family         |
| 81  | 260948_at   | 95   | 1.2 | 1.3 | 0.8 | 419  | 1.0 | 0.6 | 0.2 | AT1G06100 | fatty acid desaturase family protein                                |
| 82  | 253255_at   | 431  | 0.6 | 0.5 | 0.5 | 811  | 1.0 | 0.5 | 0.2 | AT4G34760 | auxin-induced (indole-3-acetic acid induced) protein family         |
| 83  | 251778_at   | 137  | 1.2 | 1.2 | 0.9 | 155  | 0.9 | 0.6 | 0.2 | AT3G55660 | hypothetical protein                                                |
| 84  | 267459_at   | 1001 | 0.9 | 0.7 | 0.5 | 1722 | 1.1 | 0.7 | 0.2 | AT2G33850 | expressed protein                                                   |
| 85  | 248252_at   | 925  | 0.7 | 0.8 | 0.5 | 865  | 1.0 | 0.6 | 0.2 | AT5G53250 | arabinogalactan-protein, putative (AGP22)                           |
| 86  | 257793_at   | 255  | 1.0 | 0.8 | 0.5 | 587  | 1.1 | 0.6 | 0.2 | AT3G26960 | expressed protein                                                   |
| 87  | 245343_at   | 261  | 1.0 | 0.8 | 1.1 | 366  | 0.8 | 0.4 | 0.2 | AT4G15830 | expressed protein                                                   |
| 88  | 252972_at   | 2190 | 0.6 | 0.4 | 0.5 | 1912 | 0.9 | 0.6 | 0.2 | AT4G38840 | auxin-induced (indole-3-acetic acid induced) protein, putative      |
| 89  | 254835_s_at | 450  | 0.7 | 0.8 | 1.2 | 1994 | 1.1 | 0.8 | 0.2 | AT4G12310 | cytochrome P450, putative                                           |
| 90  | 251410_at   | 157  | 0.6 | 0.4 | 0.5 | 140  | 1.3 | 0.9 | 0.2 | AT3G60280 | uclacyanin 3                                                        |
| 91  | 262312_at   | 2743 | 0.9 | 0.7 | 0.5 | 2989 | 1.0 | 0.5 | 0.2 | AT1G70830 | Bet v I allergen family                                             |
| 92  | 249934_at   | 113  | 1.0 | 0.9 | 1.0 | 126  | 1.9 | 0.9 | 0.2 | AT5G22410 | peroxidase, putative                                                |
| 93  | 263829_at   | 102  | 0.5 | 0.5 | 0.3 | 219  | 1.2 | 0.6 | 0.2 | AT2G40435 | hypothetical protein                                                |
| 94  | 250734_at   | 975  | 0.7 | 0.4 | 0.2 | 837  | 1.0 | 0.5 | 0.2 | AT5G06270 | B-type cyclin -related                                              |
| 95  | 246557_at   | 82   | 1.2 | 1.0 | 1.1 | 95   | 0.5 | 0.5 | 0.2 | AT5G15510 | expressed protein                                                   |
| 96  | 257290_at   | 92   | 1.0 | 0.9 | 1.0 | 113  | 0.6 | 0.5 | 0.2 | AT3G15560 | expressed protein                                                   |
| 97  | 249567_at   | 575  | 1.1 | 0.9 | 0.6 | 1190 | 1.1 | 0.4 | 0.2 | AT5G38020 | S-adenosyl-L-methionine:carboxyl methyltransferase family           |
| 98  | 263552_x_at | 2547 | 0.6 | 0.6 | 0.4 | 2360 | 1.1 | 0.5 | 0.2 | AT2G24980 | proline-rich protein family                                         |
| 99  | 264096_at   | 639  | 1.1 | 1.0 | 1.1 | 733  | 1.1 | 0.8 | 0.2 | AT1G78995 | expressed protein                                                   |
| 100 | 257504_at   | 97   | 0.8 | 0.6 | 0.9 | 131  | 1.1 | 0.8 | 0.2 | AT1G52250 | dynein light chain -related                                         |
| 101 | 261488_at   | 2725 | 1.2 | 1.1 | 1.1 | 3072 | 1.1 | 0.8 | 0.2 | AT1G14345 | expressed protein                                                   |
| 102 | 255604_at   | 939  | 0.5 | 0.3 | 0.1 | 1662 | 1.1 | 0.9 | 0.2 | AT4G01080 | expressed protein                                                   |
| 103 | 262109_at   | 602  | 1.0 | 0.7 | 0.8 | 669  | 0.7 | 0.4 | 0.2 | AT1G02730 | cellulose synthase family                                           |
| 104 | 244991_s_at | 509  | 0.6 | 0.6 | 0.5 | 817  | 0.9 | 0.5 | 0.2 | ATCG00890 | NADH dehydrogenase subunit 2                                        |

|     |             |      |     |     |     |      |     |     |     |           |                                                            |
|-----|-------------|------|-----|-----|-----|------|-----|-----|-----|-----------|------------------------------------------------------------|
| 105 | 258480_at   | 498  | 1.1 | 1.0 | 1.1 | 656  | 0.8 | 0.3 | 0.2 | AT3G02640 | expressed protein                                          |
| 106 | 264377_at   | 499  | 1.1 | 1.3 | 0.9 | 651  | 0.8 | 0.4 | 0.2 | AT2G25060 | similar to early nodulins                                  |
| 107 | 253946_at   | 197  | 0.9 | 0.5 | 0.4 | 555  | 1.2 | 0.7 | 0.2 | AT4G26790 | GDSL-motif lipase/hydrolase protein                        |
| 108 | 258530_at   | 141  | 0.8 | 0.4 | 0.5 | 143  | 1.1 | 0.6 | 0.2 | AT3G06840 | expressed protein                                          |
| 109 | 253998_at   | 2009 | 0.8 | 0.8 | 0.4 | 1874 | 1.1 | 0.7 | 0.2 | AT4G26010 | peroxidase, putative                                       |
| 110 | 248727_at   | 168  | 1.2 | 0.9 | 0.8 | 498  | 1.5 | 1.0 | 0.2 | AT5G47990 | cytochrome P450 family                                     |
| 111 | 258217_at   | 441  | 0.9 | 0.6 | 0.4 | 1030 | 1.1 | 0.7 | 0.2 | AT3G18000 | phosphoethanolamine N-methyltransferase, putative          |
| 112 | 265722_at   | 1486 | 1.0 | 0.9 | 1.0 | 4705 | 1.0 | 0.6 | 0.2 | AT2G40100 | light-harvesting chlorophyll a/b binding protein           |
| 113 | 258218_at   | 993  | 0.8 | 0.7 | 0.7 | 2446 | 1.1 | 0.7 | 0.2 | AT3G18000 | phosphoethanolamine N-methyltransferase, putative          |
| 114 | 262598_at   | 1022 | 0.7 | 0.5 | 0.3 | 1611 | 1.1 | 0.7 | 0.2 | AT1G15260 | expressed protein                                          |
| 115 | 250683_x_at | 1153 | 0.8 | 0.6 | 0.4 | 1173 | 1.2 | 0.5 | 0.2 | AT5G06640 | proline-rich protein family                                |
| 116 | 252510_at   | 112  | 1.2 | 0.8 | 0.9 | 168  | 1.0 | 0.6 | 0.2 | AT3G46270 | expressed protein                                          |
| 117 | 251857_at   | 196  | 0.6 | 0.9 | 0.8 | 242  | 0.9 | 0.7 | 0.2 | AT3G54770 | RNA recognition motif (RRM) - containing protein           |
| 118 | 249600_s_at | 23   | 1.6 | 4.9 | 4.2 | 95   | 1.1 | 0.7 | 0.2 | AT5G38000 | NADP-dependent oxidoreductase, putative                    |
| 119 | 250801_at   | 753  | 0.7 | 0.7 | 0.5 | 717  | 1.1 | 0.6 | 0.2 | AT5G04960 | pectinesterase family                                      |
| 120 | 245253_at   | 64   | 1.0 | 1.0 | 0.6 | 296  | 1.1 | 0.6 | 0.2 | AT4G15440 | hydroperoxide lyase (HPOL) like protein                    |
| 121 | 265099_at   | 29   | 4.3 | 2.7 | 1.9 | 139  | 1.8 | 0.3 | 0.2 | AT1G03990 | alcohol oxidase-related                                    |
| 122 | 253480_at   | 562  | 0.9 | 0.8 | 0.9 | 600  | 0.8 | 0.3 | 0.2 | AT4G31840 | plastocyanin-like domain containing protein                |
| 123 | 264802_at   | 561  | 1.2 | 1.0 | 1.0 | 555  | 0.9 | 0.4 | 0.2 | AT1G08560 | syntaxin of plants SYP111 (KNOLLE)                         |
| 124 | 249303_at   | 94   | 1.2 | 1.0 | 1.1 | 368  | 0.8 | 0.6 | 0.2 | AT5G41460 | fringe-related protein                                     |
| 125 | 257798_at   | 1234 | 0.9 | 0.6 | 0.7 | 2330 | 1.1 | 0.6 | 0.2 | AT3G15950 | expressed protein                                          |
| 126 | 260166_at   | 130  | 1.1 | 0.5 | 0.4 | 258  | 0.7 | 0.6 | 0.2 | AT1G79840 | homeodomain protein GLABRA2 (GL2)                          |
| 127 | 264029_at   | 137  | 0.7 | 0.8 | 0.8 | 166  | 1.1 | 0.8 | 0.2 | AT2G03720 | expressed protein                                          |
| 128 | 253957_at   | 381  | 1.1 | 1.1 | 0.9 | 564  | 1.0 | 0.4 | 0.2 | AT4G26320 | arabinogalactan-protein (AGP13)                            |
| 129 | 251718_at   | 80   | 1.0 | 0.9 | 0.8 | 89   | 0.6 | 0.5 | 0.2 | AT3G56100 | leucine-rich repeat transmembrane protein kinase, putative |
| 130 | 267158_at   | 1064 | 0.6 | 0.5 | 0.4 | 682  | 1.0 | 0.6 | 0.2 | AT2G37640 | expansin, putative (EXP3)                                  |
| 131 | 253613_at   | 107  | 0.8 | 1.5 | 0.9 | 173  | 0.7 | 0.6 | 0.2 | AT4G30320 | pathogenesis-related protein family                        |
| 132 | 260549_at   | 949  | 0.8 | 0.8 | 1.0 | 1677 | 0.9 | 0.7 | 0.2 | AT2G43535 | expressed protein                                          |
| 133 | 257113_at   | 135  | 0.8 | 0.9 | 0.8 | 139  | 1.0 | 0.7 | 0.2 | AT3G20130 | cytochrome P450 family                                     |
| 134 | 250248_at   | 1639 | 0.6 | 0.5 | 0.5 | 2739 | 1.1 | 0.5 | 0.2 | AT5G13740 | transporter - related                                      |
| 135 | 248656_at   | 306  | 1.0 | 0.6 | 0.8 | 368  | 0.9 | 0.4 | 0.2 | AT5G48460 | fimbrin 2 (gb AAB97844.1)                                  |
| 136 | 257021_at   | 1411 | 1.0 | 0.7 | 0.8 | 3059 | 1.0 | 0.8 | 0.2 | AT3G19710 | branched-chain amino acid aminotransferase -related        |
| 137 | 250366_at   | 1640 | 0.8 | 0.8 | 0.7 | 1957 | 1.1 | 0.6 | 0.2 | AT5G11420 | expressed protein                                          |
| 138 | 248636_at   | 394  | 0.6 | 0.6 | 0.3 | 278  | 1.9 | 0.7 | 0.2 | AT5G49080 | proline-rich protein family                                |
| 139 | 261780_at   | 133  | 0.9 | 0.8 | 0.9 | 127  | 0.9 | 0.6 | 0.2 | AT1G76310 | cyclin, putative                                           |
| 140 | 266483_at   | 1545 | 1.0 | 0.9 | 1.1 | 2277 | 0.9 | 0.6 | 0.2 | AT2G47910 | expressed protein                                          |
| 141 | 248912_at   | 729  | 0.9 | 0.7 | 0.7 | 678  | 0.8 | 0.5 | 0.2 | AT5G45670 | GDSL-motif lipase/hydrolase protein                        |

|     |             |      |     |     |     |       |     |     |     |           |                                                                                                                                       |
|-----|-------------|------|-----|-----|-----|-------|-----|-----|-----|-----------|---------------------------------------------------------------------------------------------------------------------------------------|
| 142 | 249472_at   | 930  | 0.8 | 0.8 | 1.1 | 1509  | 0.8 | 0.7 | 0.2 | AT5G39210 | expressed protein                                                                                                                     |
| 143 | 251842_at   | 469  | 0.8 | 0.9 | 0.5 | 555   | 1.2 | 0.5 | 0.2 | AT3G54580 | proline-rich protein family                                                                                                           |
| 144 | 258055_at   | 3300 | 1.0 | 0.9 | 1.0 | 4541  | 1.0 | 0.7 | 0.2 | AT3G16250 | ferredoxin - related                                                                                                                  |
| 145 | 264898_at   | 609  | 0.9 | 0.6 | 0.5 | 1343  | 1.0 | 0.7 | 0.2 | AT1G23205 | pectinesterase - related                                                                                                              |
| 146 | 259978_at   | 300  | 1.1 | 0.9 | 0.9 | 362   | 1.0 | 0.4 | 0.2 | AT1G76540 | cell division control protein, putative                                                                                               |
| 147 | 254125_at   | 229  | 1.0 | 0.9 | 1.0 | 211   | 1.1 | 0.8 | 0.2 | AT4G24670 | alliin lyase -related                                                                                                                 |
| 148 | 262290_at   | 670  | 0.7 | 0.5 | 0.6 | 224   | 1.0 | 0.6 | 0.2 | AT1G70985 | proline-rich protein family                                                                                                           |
| 149 | 259783_at   | 137  | 0.2 | 0.6 | 0.7 | 96    | 1.2 | 0.5 | 0.2 | AT1G29510 | auxin-induced (indole-3-acetic acid induced) protein, putative                                                                        |
| 150 | 266988_at   | 1490 | 1.0 | 0.7 | 0.6 | 2244  | 1.0 | 0.5 | 0.2 | AT2G39310 | jacalin lectin family                                                                                                                 |
| 151 | 251155_at   | 3603 | 0.7 | 0.7 | 0.8 | 8120  | 0.9 | 0.6 | 0.2 | AT3G63160 | expressed protein                                                                                                                     |
| 152 | 255607_at   | 688  | 0.7 | 0.5 | 0.7 | 629   | 0.9 | 0.6 | 0.2 | AT4G01130 | acetylcysteine, putative                                                                                                              |
| 153 | 253627_at   | 1112 | 0.7 | 0.7 | 0.5 | 4814  | 1.1 | 0.6 | 0.2 | AT4G30650 | low temperature and salt responsive protein homolog                                                                                   |
| 154 | 253815_at   | 408  | 0.8 | 0.5 | 0.6 | 1656  | 1.1 | 0.7 | 0.2 | AT4G28250 | beta-expansin, putative (EXPB3)                                                                                                       |
| 155 | 252833_at   | 723  | 0.6 | 0.7 | 0.4 | 548   | 1.3 | 0.6 | 0.2 | AT4G40090 | arabinogalactan-protein (AGP3)                                                                                                        |
| 156 | 265042_at   | 4688 | 1.0 | 0.7 | 0.5 | 5146  | 0.8 | 0.5 | 0.2 | AT1G04040 | acid phosphatase -related                                                                                                             |
| 157 | 266912_at   | 182  | 0.4 | 0.3 | 0.4 | 174   | 1.3 | 0.9 | 0.2 | AT2G45900 | expressed protein                                                                                                                     |
| 158 | 248691_at   | 191  | 0.9 | 1.0 | 0.7 | 236   | 0.8 | 0.4 | 0.2 | AT5G48310 | hypothetical protein                                                                                                                  |
| 159 | 246519_at   | 1856 | 0.9 | 0.6 | 0.3 | 1107  | 0.9 | 0.5 | 0.2 | AT5G15780 | proline-rich protein                                                                                                                  |
| 160 | 247406_at   | 377  | 0.9 | 0.9 | 0.6 | 407   | 1.1 | 0.5 | 0.2 | AT5G62920 | response regulator 6 (ARR6)                                                                                                           |
| 161 | 263391_at   | 331  | 0.8 | 0.6 | 0.4 | 845   | 0.9 | 0.8 | 0.2 | AT2G11810 | 1,2-diacylglycerol 3-beta-galactosyltransferase (UDP-galactose:diacylglycerol galactosyltransferase) (MGDG synthase) (MGD3), putative |
| 162 | 259736_at   | 2091 | 0.8 | 0.6 | 0.4 | 3874  | 1.0 | 0.8 | 0.2 | AT1G64390 | glycosyl hydrolase family 9 (endo-1,4-beta-glucanase)                                                                                 |
| 163 | 255517_at   | 181  | 1.3 | 1.0 | 1.2 | 342   | 1.1 | 0.6 | 0.2 | AT4G02290 | glycosyl hydrolase family 9                                                                                                           |
| 164 | 257134_at   | 238  | 1.2 | 0.9 | 1.3 | 333   | 1.0 | 0.5 | 0.2 | AT3G12870 | hypothetical protein                                                                                                                  |
| 165 | 249817_at   | 770  | 0.9 | 0.6 | 0.5 | 1397  | 1.2 | 0.5 | 0.2 | AT5G23820 | expressed protein                                                                                                                     |
| 166 | 257008_at   | 1240 | 0.8 | 0.6 | 0.8 | 1693  | 1.0 | 0.5 | 0.2 | AT3G14210 | myrosinase-associated protein, putative                                                                                               |
| 167 | 263410_at   | 2466 | 1.1 | 1.0 | 1.0 | 2295  | 1.1 | 0.6 | 0.2 | AT2G04039 | expressed protein                                                                                                                     |
| 168 | 260758_at   | 460  | 0.7 | 0.7 | 0.6 | 453   | 1.3 | 0.8 | 0.2 | AT1G48930 | glycosyl hydrolase family 9 (endo-1,4-beta-glucanase)                                                                                 |
| 169 | 261804_at   | 418  | 1.0 | 0.6 | 0.4 | 976   | 1.2 | 1.1 | 0.2 | AT1G30530 | glycosyltransferase family                                                                                                            |
| 170 | 266805_at   | 755  | 0.8 | 0.5 | 0.5 | 948   | 0.8 | 0.6 | 0.2 | AT2G30010 | expressed protein                                                                                                                     |
| 171 | 251843_x_at | 2729 | 0.8 | 0.7 | 0.5 | 2732  | 1.1 | 0.6 | 0.2 | AT3G54590 | proline-rich protein family                                                                                                           |
| 172 | 250828_at   | 395  | 0.7 | 0.6 | 0.4 | 669   | 1.1 | 0.5 | 0.2 | AT5G05250 | expressed protein                                                                                                                     |
| 173 | 261638_at   | 953  | 1.0 | 1.1 | 1.3 | 975   | 1.1 | 0.7 | 0.2 | AT1G49975 | expressed protein                                                                                                                     |
| 174 | 253729_at   | 293  | 0.8 | 0.6 | 0.7 | 237   | 0.9 | 0.6 | 0.2 | AT4G29360 | glycosyl hydrolase family 17                                                                                                          |
| 175 | 251218_at   | 8266 | 1.1 | 1.2 | 1.2 | 11290 | 1.0 | 0.8 | 0.2 | AT3G62410 | CP12 protein precursor-related protein                                                                                                |
| 176 | 247039_at   | 141  | 1.2 | 0.8 | 1.0 | 162   | 0.9 | 0.5 | 0.2 | AT5G67270 | expressed protein                                                                                                                     |
| 177 | 246716_s_at | 159  | 0.8 | 0.7 | 0.7 | 200   | 0.8 | 0.5 | 0.2 | AT5G28910 | expressed protein                                                                                                                     |

|     |             |      |     |     |     |      |     |     |     |           |                                                                        |
|-----|-------------|------|-----|-----|-----|------|-----|-----|-----|-----------|------------------------------------------------------------------------|
| 178 | 262717_s_at | 147  | 1.1 | 0.7 | 0.7 | 237  | 1.0 | 0.9 | 0.2 | AT1G16410 | cytochrome P450, putative                                              |
| 179 | 264751_at   | 500  | 0.7 | 0.8 | 1.0 | 1434 | 1.4 | 0.4 | 0.2 | AT1G23020 | ferric-chelate reductase, putative                                     |
| 180 | 250503_at   | 953  | 1.0 | 0.8 | 0.4 | 1199 | 0.9 | 0.9 | 0.2 | AT5G09820 | plastid-lipid associated protein PAP/fibrillin family                  |
| 181 | 245736_at   | 657  | 1.2 | 0.8 | 0.8 | 560  | 0.9 | 0.4 | 0.2 | AT1G73330 | Dr4(protease inhibitor)                                                |
| 182 | 250778_at   | 702  | 0.8 | 0.8 | 0.6 | 634  | 1.2 | 0.8 | 0.2 | AT5G05500 | expressed protein                                                      |
| 183 | 246149_at   | 1013 | 0.6 | 0.5 | 0.4 | 957  | 0.8 | 0.4 | 0.2 | AT5G19890 | peroxidase, putative                                                   |
| 184 | 262236_at   | 309  | 0.5 | 0.3 | 0.4 | 238  | 0.8 | 0.5 | 0.2 | AT1G48330 | expressed protein                                                      |
| 185 | 247486_at   | 754  | 1.0 | 0.9 | 0.7 | 1091 | 1.0 | 0.8 | 0.2 | AT5G62140 | hypothetical protein                                                   |
| 186 | 248839_at   | 359  | 0.5 | 0.4 | 0.2 | 326  | 1.1 | 0.7 | 0.2 | AT5G46690 | bHLH protein family                                                    |
| 187 | 258956_at   | 1548 | 0.8 | 0.9 | 1.1 | 2878 | 1.0 | 0.6 | 0.2 | AT3G01440 | PsbQ domain protein family, putative                                   |
| 188 | 255817_at   | 428  | 0.9 | 0.7 | 0.7 | 593  | 0.9 | 0.6 | 0.2 | AT2G33330 | expressed protein                                                      |
| 189 | 255140_x_at | 852  | 1.0 | 0.7 | 0.4 | 861  | 1.0 | 0.6 | 0.2 | AT4G08410 | proline-rich protein family                                            |
| 190 | 246415_at   | 458  | 1.2 | 1.0 | 1.1 | 578  | 1.0 | 0.5 | 0.2 | AT5G17160 | protein (fragment) -related                                            |
| 191 | 256125_at   | 619  | 0.9 | 0.6 | 0.7 | 742  | 0.8 | 0.5 | 0.2 | AT1G18250 | thaumatin-like protein                                                 |
| 192 | 248270_at   | 3557 | 0.7 | 0.6 | 0.6 | 6635 | 1.1 | 0.5 | 0.2 | AT5G53450 | protein kinase family                                                  |
| 193 | 246884_at   | 1613 | 0.4 | 0.1 | 0.1 | 959  | 1.0 | 0.7 | 0.2 | AT5G26220 | expressed protein                                                      |
| 194 | 255786_at   | 1416 | 0.7 | 0.8 | 0.4 | 945  | 0.9 | 0.6 | 0.2 | AT1G19670 | coronatine-induced protein 1 (COR1)                                    |
| 195 | 245262_at   | 217  | 0.6 | 0.8 | 0.7 | 429  | 1.1 | 0.6 | 0.2 | AT4G16563 | chloroplast nucleoid DNA-binding protein-related                       |
| 196 | 257908_at   | 1183 | 1.4 | 1.1 | 0.8 | 840  | 1.2 | 1.2 | 0.2 | AT3G25410 | bile acid:sodium symporter family                                      |
| 197 | 266419_at   | 262  | 0.8 | 0.7 | 0.4 | 250  | 1.0 | 0.5 | 0.2 | AT2G38760 | annexin -related                                                       |
| 198 | 260541_at   | 947  | 0.7 | 1.1 | 1.2 | 1622 | 1.1 | 0.7 | 0.2 | AT2G43530 | trypsin inhibitor -related                                             |
| 199 | 252692_at   | 308  | 0.9 | 1.0 | 0.8 | 475  | 1.0 | 0.6 | 0.2 | AT3G43960 | cysteine proteinase                                                    |
| 200 | 245739_at   | 338  | 1.0 | 0.8 | 0.7 | 371  | 0.8 | 0.5 | 0.2 | AT1G44110 | cyclin, putative                                                       |
| 201 | 248413_at   | 330  | 1.0 | 0.7 | 0.7 | 290  | 0.7 | 0.4 | 0.2 | AT5G51600 | microtubule associated protein (MAP65/ASE1) family                     |
| 202 | 261776_at   | 108  | 1.0 | 0.7 | 0.7 | 146  | 1.0 | 0.5 | 0.2 | AT1G76190 | auxin-induced (indole-3-acetic acid induced) protein family            |
| 203 | 262868_at   | 2250 | 0.7 | 0.9 | 0.8 | 3022 | 1.3 | 0.4 | 0.2 | AT1G64980 | expressed protein                                                      |
| 204 | 263951_at   | 724  | 1.0 | 0.8 | 0.8 | 956  | 0.9 | 0.6 | 0.2 | AT2G35960 | harpin-induced protein 1 family (HIN1)                                 |
| 205 | 261942_at   | 857  | 1.0 | 1.0 | 1.1 | 1031 | 0.8 | 0.6 | 0.2 | AT1G22590 | expressed protein                                                      |
| 206 | 252618_at   | 2868 | 0.8 | 0.5 | 0.5 | 9359 | 1.0 | 0.6 | 0.2 | AT3G45140 | lipoxygenase (LOX2)                                                    |
| 207 | 265102_at   | 522  | 0.8 | 0.9 | 0.5 | 568  | 1.1 | 0.7 | 0.2 | AT1G30870 | cationic peroxidase, putative                                          |
| 208 | 264567_s_at | 2264 | 0.7 | 1.0 | 0.3 | 2129 | 1.0 | 0.6 | 0.2 | AT1G05250 | peroxidase, putative                                                   |
| 209 | 266920_at   | 451  | 0.8 | 0.6 | 0.6 | 457  | 0.8 | 0.6 | 0.2 | AT2G45750 | dehydration-induced protein family                                     |
| 210 | 247816_at   | 3154 | 0.9 | 0.9 | 0.9 | 3893 | 1.1 | 0.7 | 0.2 | AT5G58260 | unknown protein (pir  S75584) -related                                 |
| 211 | 255662_at   | 368  | 1.0 | 0.5 | 0.3 | 340  | 1.1 | 0.6 | 0.2 | AT4G00410 | expressed protein                                                      |
| 212 | 254687_at   | 2039 | 1.1 | 0.7 | 0.6 | 3243 | 0.9 | 0.8 | 0.2 | AT4G13770 | cytochrome P450 family                                                 |
| 213 | 254221_at   | 1589 | 0.9 | 0.7 | 0.5 | 1359 | 0.9 | 0.5 | 0.2 | AT4G23820 | polygalacturonase, putative                                            |
| 214 | 252853_at   | 986  | 0.8 | 1.1 | 1.4 | 1439 | 1.1 | 0.6 | 0.2 | AT4G39710 | immunophilin / FKBP-type peptidyl-prolyl cis-trans isomerase, putative |

|            |           |       |     |     |     |       |     |     |     |           |                                                  |
|------------|-----------|-------|-----|-----|-----|-------|-----|-----|-----|-----------|--------------------------------------------------|
| <b>215</b> | 256832_at | 322   | 1.2 | 1.1 | 1.1 | 318   | 0.8 | 0.4 | 0.2 | AT3G22880 | meiotic recombination protein (AtDMC1)           |
| <b>216</b> | 255969_at | 86    | 1.4 | 0.6 | 0.7 | 74    | 0.7 | 0.4 | 0.2 | AT1G22330 | RNA recognition motif (RRM) - containing protein |
| <b>217</b> | 249375_at | 2106  | 0.8 | 1.0 | 0.7 | 2177  | 1.0 | 0.4 | 0.2 | AT5G40730 | arabinogalactan-protein (AGP24)                  |
| <b>218</b> | 246004_at | 9841  | 0.8 | 0.7 | 0.8 | 13870 | 0.9 | 0.6 | 0.2 | AT5G20630 | germin-like protein (AtGER3)                     |
| <b>219</b> | 251527_at | 156   | 1.2 | 1.0 | 1.0 | 143   | 1.0 | 0.6 | 0.2 | AT3G58650 | expressed protein                                |
| <b>220</b> | 258867_at | 93    | 1.3 | 1.1 | 1.2 | 106   | 0.8 | 0.4 | 0.2 | AT3G03130 | hypothetical protein                             |
| <b>221</b> | 251142_at | 397   | 1.2 | 0.9 | 1.0 | 551   | 0.9 | 0.4 | 0.2 | AT5G01015 | expressed protein                                |
| <b>222</b> | 257800_at | 1081  | 0.8 | 0.8 | 0.8 | 1033  | 1.1 | 0.8 | 0.2 | AT3G15900 | expressed protein                                |
| <b>223</b> | 266820_at | 1082  | 0.7 | 0.3 | 0.2 | 538   | 1.0 | 0.6 | 0.2 | AT2G44940 | AP2 domain transcription factor TINY, putative   |
| <b>224</b> | 256015_at | 4178  | 0.9 | 1.0 | 1.1 | 5511  | 1.0 | 0.6 | 0.2 | AT1G19150 | light-harvesting chlorophyll a/b binding protein |
| <b>225</b> | 255088_at | 342   | 0.8 | 0.9 | 0.9 | 474   | 1.2 | 0.8 | 0.2 | AT4G09350 | DnaJ protein family                              |
| <b>226</b> | 266329_at | 1308  | 0.9 | 0.9 | 1.0 | 1336  | 1.1 | 0.8 | 0.2 | AT2G01590 | expressed protein                                |
| <b>227</b> | 264378_at | 145   | 1.0 | 0.9 | 1.0 | 241   | 0.9 | 0.7 | 0.2 | AT2G25220 | protein kinase family                            |
| <b>228</b> | 251524_at | 1086  | 0.8 | 0.6 | 0.5 | 2119  | 1.0 | 0.8 | 0.2 | AT3G58990 | aconitase family                                 |
| <b>229</b> | 260902_at | 738   | 0.9 | 0.7 | 0.9 | 1498  | 1.1 | 0.7 | 0.3 | AT1G21440 | expressed protein                                |
| <b>230</b> | 258851_at | 161   | 0.7 | 1.0 | 0.5 | 470   | 0.9 | 0.6 | 0.3 | AT3G03190 | glutathione transferase, putative                |
| <b>231</b> | 265085_at | 118   | 1.2 | 1.2 | 1.0 | 95    | 0.9 | 0.6 | 0.3 | AT1G03780 | expressed protein                                |
| <b>232</b> | 257679_at | 456   | 1.1 | 0.7 | 0.6 | 725   | 0.9 | 0.6 | 0.3 | AT3G20470 | glycine-rich protein                             |
| <b>233</b> | 248676_at | 595   | 0.3 | 0.1 | 0.1 | 614   | 1.2 | 1.1 | 0.3 | AT5G48850 | male sterility MS5 family                        |
| <b>234</b> | 248324_at | 143   | 0.9 | 0.9 | 0.8 | 273   | 0.8 | 0.4 | 0.3 | AT5G52790 | hypothetical protein                             |
| <b>235</b> | 265665_at | 279   | 3.1 | 2.8 | 1.0 | 298   | 0.9 | 0.3 | 0.3 | AT2G27420 | cysteine proteinase                              |
| <b>236</b> | 244999_at | 201   | 1.0 | 0.8 | 0.8 | 376   | 0.7 | 0.7 | 0.3 | ATCG00190 | RNA polymerase beta chain (RPOB)                 |
| <b>237</b> | 260388_at | 483   | 1.1 | 0.9 | 0.8 | 696   | 0.9 | 0.6 | 0.3 | AT1G74070 | expressed protein                                |
| <b>238</b> | 252365_at | 501   | 1.0 | 1.0 | 0.7 | 903   | 1.1 | 0.7 | 0.3 | AT3G48350 | cysteine proteinase, putative                    |
| <b>239</b> | 257673_at | 3110  | 1.1 | 0.7 | 0.6 | 5460  | 1.1 | 0.7 | 0.3 | AT3G20370 | expressed protein                                |
| <b>240</b> | 247377_at | 890   | 0.6 | 0.6 | 1.0 | 2021  | 1.0 | 0.7 | 0.3 | AT5G63180 | polysaccharide lyase family 1 (pectate lyase)    |
| <b>241</b> | 259786_at | 2713  | 0.8 | 0.6 | 0.3 | 3381  | 0.9 | 0.7 | 0.3 | AT1G29660 | GDSL-motif lipase/hydrolase protein              |
| <b>242</b> | 245980_at | 2115  | 0.9 | 0.8 | 0.8 | 2050  | 0.9 | 0.6 | 0.3 | AT5G13140 | expressed protein                                |
| <b>243</b> | 262612_at | 4198  | 0.9 | 1.0 | 1.1 | 5189  | 1.0 | 0.7 | 0.3 | AT1G14150 | PsbQ domain protein family                       |
| <b>244</b> | 259664_at | 10003 | 0.9 | 0.9 | 0.8 | 10643 | 0.9 | 0.5 | 0.3 | AT1G55330 | arabinogalactan-protein (AGP21)                  |
| <b>245</b> | 246231_at | 505   | 0.8 | 0.6 | 0.4 | 785   | 1.0 | 0.9 | 0.3 | AT4G37080 | expressed protein                                |
| <b>246</b> | 247347_at | 2989  | 0.7 | 0.8 | 0.9 | 4002  | 0.9 | 0.7 | 0.3 | AT5G63780 | C3HC4-type zinc finger protein family            |
| <b>247</b> | 255692_at | 975   | 0.8 | 0.8 | 0.7 | 1122  | 0.9 | 0.5 | 0.3 | AT4G00400 | expressed protein                                |
| <b>248</b> | 259854_at | 250   | 0.7 | 0.5 | 0.8 | 327   | 1.1 | 0.6 | 0.3 | AT1G72200 | RING-H2 zinc finger protein ATL3 -related        |
| <b>249</b> | 261782_at | 212   | 1.1 | 1.1 | 1.3 | 275   | 0.9 | 0.8 | 0.3 | AT1G76110 | expressed protein                                |
| <b>250</b> | 263750_at | 3527  | 1.0 | 0.9 | 1.0 | 3671  | 0.8 | 0.7 | 0.3 | AT2G21530 | expressed protein                                |
| <b>251</b> | 261099_at | 292   | 1.0 | 0.9 | 0.6 | 261   | 1.2 | 1.0 | 0.3 | AT1G62980 | expansin, putative (EXP18)                       |

|            |             |       |     |     |     |       |     |     |     |           |                                                                          |
|------------|-------------|-------|-----|-----|-----|-------|-----|-----|-----|-----------|--------------------------------------------------------------------------|
| <b>252</b> | 253579_at   | 640   | 1.0 | 0.8 | 0.5 | 883   | 0.8 | 0.6 | 0.3 | AT4G30610 | serine carboxypeptidase -related                                         |
| <b>253</b> | 263034_at   | 1557  | 1.0 | 0.7 | 0.7 | 4083  | 1.1 | 0.8 | 0.3 | AT1G24020 | Bet v I allergen family                                                  |
| <b>254</b> | 245422_at   | 249   | 0.7 | 0.5 | 0.3 | 282   | 1.1 | 0.6 | 0.3 | AT4G17470 | palmitoyl protein thioesterase precursor, putative                       |
| <b>255</b> | 259328_at   | 316   | 0.9 | 0.8 | 0.6 | 316   | 1.3 | 0.6 | 0.3 | AT3G16440 | jacalin lectin family                                                    |
| <b>256</b> | 248074_at   | 872   | 0.8 | 0.7 | 0.7 | 1246  | 1.1 | 0.6 | 0.3 | AT5G55730 | fasciclin-like arabinogalactan-protein (FLA1)                            |
| <b>257</b> | 255265_at   | 149   | 1.2 | 1.0 | 1.0 | 165   | 0.8 | 0.5 | 0.3 | AT4G05190 | kinesin-like protein A, putative                                         |
| <b>258</b> | 266285_at   | 1581  | 1.0 | 0.9 | 1.0 | 1854  | 0.9 | 0.6 | 0.3 | AT2G29180 | expressed protein                                                        |
| <b>259</b> | 249718_at   | 457   | 1.1 | 1.0 | 1.2 | 619   | 0.9 | 0.5 | 0.3 | AT5G35740 | glycosyl hydrolase family 17                                             |
| <b>260</b> | 263174_at   | 10388 | 1.0 | 0.8 | 0.5 | 17056 | 1.0 | 0.7 | 0.3 | AT1G54040 | Kelch repeats protein family                                             |
| <b>261</b> | 250832_at   | 1153  | 0.9 | 0.7 | 0.5 | 2561  | 1.0 | 0.7 | 0.3 | AT5G04950 | nicotianamine synthase, putative                                         |
| <b>262</b> | 259660_at   | 4064  | 0.8 | 0.6 | 0.4 | 4621  | 1.0 | 0.7 | 0.3 | AT1G55260 | protease inhibitor/seed storage/lipid transfer protein (LTP) family      |
| <b>263</b> | 245196_at   | 330   | 0.8 | 0.5 | 0.7 | 655   | 1.0 | 0.6 | 0.3 | AT1G67750 | polysaccharide lyase family 1 (pectate lyase)                            |
| <b>264</b> | 254644_at   | 111   | 1.0 | 0.4 | 0.9 | 143   | 0.5 | 0.4 | 0.3 | AT4G18510 | CLE2, putative                                                           |
| <b>265</b> | 245172_at   | 406   | 0.9 | 0.8 | 0.7 | 366   | 1.0 | 0.8 | 0.3 | AT2G47540 | expressed protein                                                        |
| <b>266</b> | 259867_at   | 69    | 1.1 | 0.8 | 1.0 | 90    | 1.2 | 0.5 | 0.3 | AT1G76740 | expressed protein                                                        |
| <b>267</b> | 257300_at   | 234   | 0.7 | 0.5 | 0.7 | 407   | 1.2 | 0.9 | 0.3 | AT3G28080 | nodulin MitN21 family protein                                            |
| <b>268</b> | 258376_at   | 263   | 1.1 | 0.9 | 1.0 | 233   | 1.1 | 0.4 | 0.3 | AT3G17680 | expressed protein                                                        |
| <b>269</b> | 252950_at   | 714   | 0.7 | 0.7 | 0.6 | 510   | 1.0 | 0.5 | 0.3 | AT4G38690 | expressed protein                                                        |
| <b>270</b> | 244989_s_at | 192   | 0.6 | 0.6 | 0.6 | 258   | 1.0 | 0.5 | 0.3 | ATCG00860 | ycf2                                                                     |
| <b>271</b> | 264201_at   | 561   | 0.8 | 1.0 | 1.3 | 554   | 1.2 | 0.8 | 0.3 | AT1G22630 | auxin-regulated protein                                                  |
| <b>272</b> | 266979_at   | 3172  | 1.1 | 1.0 | 1.2 | 4028  | 1.1 | 0.6 | 0.3 | AT2G39470 | oxygen-evolving complex 25.6 kD protein, chloroplast precursor, putative |
| <b>273</b> | 249073_at   | 5265  | 0.9 | 0.5 | 0.4 | 2900  | 0.8 | 0.6 | 0.3 | AT5G44020 | vegetative storage protein-related                                       |
| <b>274</b> | 264347_at   | 302   | 0.8 | 0.7 | 0.3 | 234   | 1.2 | 0.6 | 0.3 | AT1G12040 | leucine-rich repeat extensin family                                      |
| <b>275</b> | 256894_at   | 676   | 1.8 | 2.0 | 1.7 | 909   | 1.0 | 0.8 | 0.3 | AT3G21870 | cyclin family                                                            |
| <b>276</b> | 257875_at   | 263   | 0.4 | 0.8 | 0.9 | 399   | 1.1 | 0.7 | 0.3 | AT3G17120 | expressed protein                                                        |
| <b>277</b> | 260745_at   | 1907  | 1.1 | 0.8 | 1.1 | 4200  | 1.1 | 0.9 | 0.3 | AT1G78370 | glutathione transferase, putative                                        |
| <b>278</b> | 255632_at   | 650   | 0.6 | 1.1 | 0.6 | 595   | 1.1 | 0.6 | 0.3 | AT4G00680 | actin-depolymerizing factor -related                                     |
| <b>279</b> | 245005_at   | 277   | 0.9 | 1.0 | 1.2 | 545   | 0.7 | 0.6 | 0.3 | ATCG00330 | ribosomal protein S14                                                    |
| <b>280</b> | 254225_at   | 3104  | 0.8 | 0.9 | 0.7 | 4275  | 1.0 | 0.6 | 0.3 | AT4G23670 | major latex protein (MLP)-related                                        |
| <b>281</b> | 258222_at   | 329   | 1.0 | 1.0 | 1.1 | 514   | 1.0 | 0.9 | 0.3 | AT3G15680 | zinc finger protein -related                                             |
| <b>282</b> | 250437_at   | 1873  | 0.8 | 0.7 | 0.6 | 1530  | 1.0 | 0.5 | 0.3 | AT5G10430 | arabinogalactan-protein (AGP4)                                           |
| <b>283</b> | 266324_at   | 364   | 0.7 | 0.6 | 0.6 | 383   | 0.8 | 0.5 | 0.3 | AT2G46710 | rac GTPase activating protein -related                                   |
| <b>284</b> | 259281_at   | 179   | 1.6 | 0.5 | 0.3 | 275   | 1.0 | 0.6 | 0.3 | AT3G01140 | myb family transcription factor                                          |
| <b>285</b> | 249599_at   | 220   | 1.2 | 0.7 | 0.7 | 272   | 1.0 | 0.5 | 0.3 | AT5G37990 | methyltransferase-related                                                |
| <b>286</b> | 260118_s_at | 224   | 0.9 | 0.8 | 1.2 | 321   | 1.2 | 0.7 | 0.3 | AT1G33940 | hypothetical protein                                                     |
| <b>287</b> | 257706_at   | 508   | 1.0 | 0.9 | 0.9 | 524   | 1.0 | 0.8 | 0.3 | AT3G12685 | expressed protein                                                        |



|            |           |      |     |     |     |      |     |     |     |           |                                                                      |
|------------|-----------|------|-----|-----|-----|------|-----|-----|-----|-----------|----------------------------------------------------------------------|
| <b>288</b> | 245347_at | 2368 | 0.8 | 1.2 | 1.5 | 3405 | 1.0 | 0.7 | 0.3 | AT4G14890 | ferredoxin family                                                    |
| <b>289</b> | 266956_at | 665  | 1.0 | 0.8 | 0.8 | 791  | 0.8 | 0.5 | 0.3 | AT2G34510 | expressed protein                                                    |
| <b>290</b> | 247362_at | 516  | 0.9 | 0.9 | 0.8 | 555  | 0.9 | 0.6 | 0.3 | AT5G63140 | calcineurin-like phosphoesterase family                              |
| <b>291</b> | 258932_at | 102  | 1.0 | 0.8 | 0.6 | 239  | 1.3 | 0.7 | 0.3 | AT3G10150 | calcineurin-like phosphoesterase family                              |
| <b>292</b> | 246505_at | 382  | 1.2 | 0.9 | 0.9 | 304  | 1.0 | 0.5 | 0.3 | AT5G16250 | expressed protein                                                    |
| <b>293</b> | 257171_at | 767  | 1.0 | 1.0 | 1.0 | 943  | 0.9 | 0.8 | 0.3 | AT3G23760 | expressed protein                                                    |
| <b>294</b> | 266827_at | 81   | 0.5 | 0.8 | 0.4 | 113  | 1.3 | 0.6 | 0.3 | AT2G22920 | serine carboxypeptidase -related                                     |
| <b>295</b> | 263497_at | 252  | 2.4 | 1.4 | 1.0 | 702  | 0.9 | 0.6 | 0.3 | AT2G42540 | cold-regulated protein (cor15a)                                      |
| <b>296</b> | 254107_at | 152  | 0.8 | 0.8 | 0.5 | 167  | 1.0 | 0.6 | 0.3 | AT4G25220 | transporter, putative                                                |
| <b>297</b> | 246492_at | 474  | 0.8 | 0.9 | 1.0 | 495  | 1.0 | 0.7 | 0.3 | AT5G16140 | CRS2-related protein                                                 |
| <b>298</b> | 254044_at | 1524 | 0.7 | 0.9 | 0.6 | 1232 | 1.3 | 0.6 | 0.3 | AT4G25820 | xyloglucan endotransglycosylase XTR9                                 |
| <b>299</b> | 258859_at | 247  | 1.1 | 0.8 | 1.1 | 268  | 0.7 | 0.4 | 0.3 | AT3G02120 | expressed protein                                                    |
| <b>300</b> | 249392_at | 317  | 0.6 | 0.6 | 0.8 | 409  | 1.0 | 0.7 | 0.3 | AT5G40150 | peroxidase, putative                                                 |
| <b>301</b> | 266007_at | 147  | 0.7 | 0.7 | 0.7 | 191  | 0.8 | 0.4 | 0.3 | AT2G37380 | expressed protein                                                    |
| <b>302</b> | 264319_at | 321  | 0.8 | 0.6 | 0.5 | 228  | 1.2 | 0.5 | 0.3 | AT1G04110 | subtilisin-like serine protease, putative                            |
| <b>303</b> | 247101_at | 3587 | 1.0 | 0.9 | 1.3 | 6281 | 0.8 | 0.5 | 0.3 | AT5G66530 | aldose 1-epimerase family                                            |
| <b>304</b> | 248057_at | 111  | 1.0 | 0.9 | 1.1 | 106  | 0.7 | 0.4 | 0.3 | AT5G55520 | hypothetical protein                                                 |
| <b>305</b> | 266500_at | 2177 | 0.8 | 0.7 | 0.8 | 1827 | 0.8 | 0.6 | 0.3 | AT2G06925 | phospholipase A2 family protein                                      |
| <b>306</b> | 252607_at | 3255 | 0.7 | 0.8 | 1.0 | 7103 | 1.0 | 0.9 | 0.3 | AT3G44990 | xyloglucan endotransglycosylase, putative                            |
| <b>307</b> | 259851_at | 132  | 1.2 | 0.9 | 1.0 | 138  | 1.0 | 0.5 | 0.3 | AT1G72250 | kinesin-related protein                                              |
| <b>308</b> | 249986_at | 347  | 1.0 | 0.5 | 0.4 | 455  | 0.9 | 0.7 | 0.3 | AT5G18460 | expressed protein                                                    |
| <b>309</b> | 262533_at | 209  | 0.9 | 0.9 | 0.6 | 784  | 1.1 | 0.7 | 0.3 | AT1G17090 | expressed protein                                                    |
| <b>310</b> | 251941_at | 552  | 1.3 | 1.2 | 1.2 | 664  | 0.9 | 0.6 | 0.3 | AT3G53470 | expressed protein                                                    |
| <b>311</b> | 259968_at | 389  | 1.0 | 0.9 | 1.0 | 538  | 0.9 | 0.7 | 0.3 | AT1G76530 | auxin efflux carrier protein family                                  |
| <b>312</b> | 264998_at | 1007 | 0.8 | 0.8 | 0.7 | 1083 | 1.1 | 0.7 | 0.3 | AT1G67330 | expressed protein                                                    |
| <b>313</b> | 262105_at | 250  | 1.0 | 1.3 | 1.2 | 303  | 1.1 | 0.6 | 0.3 | AT1G02810 | pectinesterase family                                                |
| <b>314</b> | 262878_at | 2406 | 0.9 | 0.9 | 0.8 | 3089 | 1.0 | 0.7 | 0.3 | AT1G64770 | expressed protein                                                    |
| <b>315</b> | 247880_at | 583  | 0.8 | 0.4 | 0.3 | 494  | 1.2 | 0.6 | 0.3 | AT5G57780 | expressed protein                                                    |
| <b>316</b> | 265265_at | 285  | 1.1 | 1.3 | 1.0 | 321  | 1.0 | 0.4 | 0.3 | AT2G42900 | expressed protein                                                    |
| <b>317</b> | 246829_at | 2727 | 0.8 | 0.7 | 0.7 | 4486 | 1.0 | 0.6 | 0.3 | AT5G26570 | expressed protein                                                    |
| <b>318</b> | 256796_at | 4948 | 1.1 | 1.2 | 1.5 | 5000 | 1.0 | 0.7 | 0.3 | AT3G22210 | expressed protein                                                    |
| <b>319</b> | 251545_at | 184  | 0.8 | 0.9 | 0.6 | 538  | 0.8 | 0.3 | 0.3 | AT3G58810 | zinc transporter, putative/metal tolerance protein, putative (MTPa2) |
| <b>320</b> | 254326_at | 96   | 1.5 | 1.6 | 1.8 | 269  | 1.4 | 0.7 | 0.3 | AT4G22610 | protease inhibitor/seed storage/lipid transfer protein (LTP) family  |
| <b>321</b> | 250649_at | 868  | 0.6 | 0.8 | 0.7 | 1177 | 0.9 | 0.9 | 0.3 | AT5G06690 | thioredoxin family                                                   |
| <b>322</b> | 252089_at | 193  | 1.0 | 0.8 | 0.7 | 195  | 0.9 | 0.5 | 0.3 | AT3G52110 | expressed protein                                                    |
| <b>323</b> | 255825_at | 782  | 0.9 | 0.5 | 0.3 | 784  | 1.0 | 0.7 | 0.3 | AT2G40475 | expressed protein                                                    |

|            |             |       |     |     |     |       |     |     |     |           |                                                                                    |
|------------|-------------|-------|-----|-----|-----|-------|-----|-----|-----|-----------|------------------------------------------------------------------------------------|
| <b>324</b> | 254789_at   | 3866  | 0.8 | 0.7 | 0.5 | 4525  | 1.0 | 0.7 | 0.3 | AT4G12880 | plastocyanin-like domain containing protein                                        |
| <b>325</b> | 261084_at   | 1396  | 0.9 | 1.0 | 1.2 | 2176  | 1.0 | 0.8 | 0.3 | AT1G07440 | short-chain dehydrogenase/reductase family protein (tropinone reductase, putative) |
| <b>326</b> | 258067_at   | 180   | 1.1 | 1.0 | 0.9 | 196   | 0.9 | 0.4 | 0.3 | AT3G25980 | mitotic checkpoint protein -related                                                |
| <b>327</b> | 263674_at   | 612   | 0.9 | 1.1 | 1.3 | 884   | 0.9 | 0.6 | 0.3 | AT2G04790 | expressed protein                                                                  |
| <b>328</b> | 259738_at   | 1121  | 1.0 | 0.8 | 0.9 | 1000  | 1.0 | 0.8 | 0.3 | AT1G64355 | expressed protein                                                                  |
| <b>329</b> | 245346_at   | 2567  | 1.3 | 1.0 | 0.7 | 5036  | 1.0 | 0.9 | 0.3 | AT4G17090 | glycosyl hydrolase family 14 (beta-amylase)                                        |
| <b>330</b> | 255506_at   | 210   | 1.0 | 0.7 | 0.8 | 264   | 1.1 | 0.9 | 0.3 | AT4G02130 | glycosyltransferase family 8                                                       |
| <b>331</b> | 258498_at   | 9     | 4.8 | 6.0 | 5.6 | 141   | 1.5 | 0.2 | 0.3 | AT3G02480 | expressed protein                                                                  |
| <b>332</b> | 256676_at   | 1219  | 0.8 | 0.9 | 0.8 | 3305  | 1.0 | 0.8 | 0.3 | AT3G52180 | expressed protein                                                                  |
| <b>333</b> | 251058_at   | 1006  | 0.8 | 0.5 | 0.3 | 795   | 1.0 | 0.9 | 0.3 | AT5G01790 | expressed protein                                                                  |
| <b>334</b> | 262218_at   | 199   | 0.8 | 0.7 | 0.5 | 591   | 0.9 | 0.5 | 0.3 | AT1G74760 | hypothetical protein                                                               |
| <b>335</b> | 262693_at   | 1203  | 0.9 | 0.9 | 1.1 | 1780  | 1.0 | 0.7 | 0.3 | AT1G62780 | expressed protein                                                                  |
| <b>336</b> | 261226_at   | 1891  | 0.5 | 0.3 | 0.4 | 1196  | 1.1 | 0.3 | 0.3 | AT1G20190 | expansin, putative (EXP11)                                                         |
| <b>337</b> | 258471_at   | 118   | 1.0 | 0.7 | 1.2 | 134   | 0.9 | 0.6 | 0.3 | AT3G06030 | protein kinase, putative                                                           |
| <b>338</b> | 251586_at   | 202   | 1.8 | 1.1 | 0.7 | 206   | 1.1 | 0.9 | 0.3 | AT3G58070 | zinc finger-related protein                                                        |
| <b>339</b> | 264160_at   | 197   | 1.0 | 0.5 | 0.4 | 216   | 1.1 | 0.8 | 0.3 | AT1G65450 | anthranilate N-hydroxycinnamoyl/benzoyltransferase - related                       |
| <b>340</b> | 259382_s_at | 10082 | 0.9 | 0.8 | 0.6 | 14668 | 1.0 | 0.7 | 0.3 | AT3G16430 | myrosinase binding protein, putative                                               |
| <b>341</b> | 248329_at   | 2130  | 0.9 | 1.0 | 1.1 | 3205  | 1.0 | 0.8 | 0.3 | AT5G52780 | expressed protein                                                                  |
| <b>342</b> | 264146_at   | 503   | 0.9 | 0.7 | 0.7 | 1210  | 0.9 | 0.6 | 0.3 | AT1G02205 | CER1 protein                                                                       |
| <b>343</b> | 245275_at   | 23    | 1.3 | 1.0 | 2.8 | 176   | 1.0 | 1.3 | 0.3 | AT4G15210 | glycosyl hydrolase family 14 (beta-amylase)                                        |
| <b>344</b> | 256673_at   | 246   | 1.0 | 0.9 | 0.7 | 655   | 1.1 | 0.8 | 0.3 | AT3G52370 | predicted GPI-anchored protein                                                     |
| <b>345</b> | 244968_at   | 6055  | 0.8 | 0.7 | 0.7 | 7468  | 1.1 | 0.8 | 0.3 | ATCG00640 | ribosomal protein L33 (RPL33)                                                      |
| <b>346</b> | 247443_at   | 4018  | 0.7 | 0.7 | 0.8 | 4470  | 1.0 | 0.6 | 0.3 | AT5G62720 | expressed protein                                                                  |
| <b>347</b> | 256602_at   | 156   | 1.2 | 1.0 | 0.5 | 122   | 1.3 | 0.4 | 0.3 | AT3G28310 | hypothetical protein                                                               |
| <b>348</b> | 266078_at   | 99    | 0.8 | 0.9 | 1.1 | 126   | 0.8 | 0.6 | 0.3 | AT2G40670 | response regulator 16                                                              |
| <b>349</b> | 256441_at   | 772   | 1.0 | 1.1 | 1.2 | 1533  | 1.0 | 0.6 | 0.3 | AT3G10940 | expressed protein                                                                  |
| <b>350</b> | 245806_at   | 2821  | 1.0 | 0.9 | 0.9 | 3124  | 1.0 | 0.7 | 0.3 | AT1G45474 | light-harvesting chlorophyll a/b binding protein                                   |
| <b>351</b> | 252296_at   | 203   | 0.6 | 0.6 | 0.8 | 182   | 1.2 | 0.8 | 0.3 | AT3G48970 | copper-binding protein family                                                      |
| <b>352</b> | 261266_at   | 1308  | 0.7 | 0.5 | 0.3 | 3150  | 1.0 | 1.0 | 0.3 | AT1G26770 | expansin, putative (EXP10)                                                         |
| <b>353</b> | 267388_at   | 629   | 0.9 | 1.0 | 0.8 | 744   | 0.9 | 0.6 | 0.3 | AT2G44450 | glycosyl hydrolase family 1                                                        |
| <b>354</b> | 249867_at   | 1330  | 0.9 | 0.7 | 0.9 | 2998  | 1.0 | 0.8 | 0.3 | AT5G23020 | 2-isopropylmalate synthase-related protein                                         |
| <b>355</b> | 257456_at   | 110   | 2.0 | 1.9 | 1.5 | 98    | 0.8 | 0.9 | 0.3 | AT2G18120 | expressed protein                                                                  |
| <b>356</b> | 247040_at   | 273   | 0.9 | 0.8 | 0.8 | 402   | 1.1 | 0.7 | 0.3 | AT5G67150 | hydroxycinnamoyl/benzoyltransferase-related                                        |
| <b>357</b> | 258962_at   | 84    | 0.9 | 0.9 | 0.7 | 171   | 0.8 | 0.6 | 0.3 | AT3G10570 | cytochrome P450, putative                                                          |
| <b>358</b> | 247100_at   | 96    | 1.0 | 1.3 | 1.4 | 158   | 0.9 | 0.5 | 0.3 | AT5G66520 | pentatricopeptide (PPR) repeat-containing protein                                  |
| <b>359</b> | 255450_at   | 106   | 1.0 | 1.1 | 1.0 | 219   | 1.0 | 0.7 | 0.3 | AT4G02850 | hypothetical protein                                                               |

|     |             |      |     |     |     |      |     |     |     |           |                                                     |
|-----|-------------|------|-----|-----|-----|------|-----|-----|-----|-----------|-----------------------------------------------------|
| 360 | 262427_s_at | 1469 | 0.8 | 0.7 | 0.6 | 1330 | 1.1 | 0.5 | 0.3 | AT1G47600 | glycosyl hydrolase family 1                         |
| 361 | 258082_at   | 159  | 0.6 | 0.7 | 0.5 | 204  | 1.0 | 0.6 | 0.3 | AT3G25905 | CLE27, putative                                     |
| 362 | 266418_at   | 1336 | 0.7 | 0.4 | 0.2 | 1196 | 1.1 | 0.7 | 0.3 | AT2G38750 | annexin -related                                    |
| 363 | 244985_at   | 4639 | 0.8 | 0.8 | 0.7 | 5943 | 1.0 | 0.6 | 0.3 | ATCG00810 | ribosomal protein L22 (RPL22)                       |
| 364 | 262847_at   | 334  | 0.6 | 0.6 | 0.5 | 340  | 1.0 | 1.0 | 0.3 | AT1G14840 | expressed protein                                   |
| 365 | 262566_at   | 4256 | 1.1 | 1.0 | 1.0 | 5922 | 0.9 | 0.6 | 0.3 | AT1G34310 | auxin response factor 1 -related                    |
| 366 | 261048_at   | 136  | 0.7 | 0.4 | 0.5 | 144  | 1.2 | 1.0 | 0.3 | AT1G01420 | glycosyltransferase family                          |
| 367 | 261921_at   | 232  | 0.8 | 0.7 | 0.7 | 459  | 0.9 | 0.8 | 0.3 | AT1G65900 | expressed protein                                   |
| 368 | 264061_at   | 468  | 1.1 | 1.0 | 1.2 | 741  | 0.8 | 0.6 | 0.3 | AT2G27970 | CDK-subunit 2                                       |
| 369 | 254783_at   | 1450 | 0.8 | 0.9 | 1.0 | 1917 | 1.1 | 0.8 | 0.3 | AT4G12830 | hydrolase, alpha/beta fold family                   |
| 370 | 247037_at   | 2304 | 0.8 | 0.7 | 0.8 | 3223 | 0.9 | 0.6 | 0.3 | AT5G67070 | expressed protein                                   |
| 371 | 266336_at   | 475  | 1.0 | 0.7 | 0.5 | 472  | 1.3 | 0.9 | 0.3 | AT2G32270 | zinc transporter (ZIP3)                             |
| 372 | 257510_at   | 1122 | 0.8 | 0.7 | 0.7 | 1440 | 1.1 | 0.8 | 0.3 | AT1G55360 | expressed protein                                   |
| 373 | 247645_at   | 192  | 1.1 | 1.0 | 0.7 | 262  | 0.7 | 0.5 | 0.3 | AT5G60530 | late embryonic abundant protein - like              |
| 374 | 266460_at   | 835  | 0.8 | 0.6 | 0.4 | 486  | 1.0 | 0.8 | 0.3 | AT2G47930 | proline-rich protein family                         |
| 375 | 258252_at   | 105  | 0.7 | 0.9 | 0.8 | 297  | 0.8 | 0.8 | 0.3 | AT3G15720 | polygalacturonase, putative                         |
| 376 | 259842_at   | 1259 | 0.9 | 0.7 | 0.7 | 1703 | 0.8 | 0.7 | 0.3 | AT1G73600 | phosphoethanolamine N-methyltransferase -related    |
| 377 | 258589_at   | 1544 | 0.8 | 0.6 | 0.5 | 2284 | 1.0 | 0.9 | 0.3 | AT3G04290 | GDSL-motif lipase/hydrolase protein                 |
| 378 | 248242_at   | 1591 | 0.9 | 0.9 | 1.0 | 1899 | 1.1 | 0.7 | 0.3 | AT5G53580 | aldo/keto reductase family                          |
| 379 | 246920_at   | 127  | 1.1 | 0.7 | 0.9 | 205  | 0.6 | 0.4 | 0.3 | AT5G25090 | plastocyanin-like domain containing protein         |
| 380 | 246142_at   | 172  | 0.8 | 0.6 | 0.5 | 201  | 0.7 | 0.4 | 0.3 | AT5G19970 | hypothetical protein                                |
| 381 | 267545_at   | 1122 | 0.7 | 0.7 | 0.5 | 1365 | 0.8 | 0.5 | 0.3 | AT2G32690 | glycine-rich protein                                |
| 382 | 263153_s_at | 1982 | 0.9 | 0.7 | 0.7 | 2902 | 1.1 | 0.8 | 0.3 | AT1G54010 | myrosinase-associated protein, putative             |
| 383 | 258633_at   | 149  | 0.8 | 0.9 | 0.8 | 197  | 0.8 | 0.6 | 0.3 | AT3G07990 | serine carboxypeptidase -related                    |
| 384 | 253533_at   | 465  | 0.9 | 0.8 | 0.6 | 529  | 1.1 | 0.8 | 0.3 | AT4G31590 | glycosyltransferase family 2                        |
| 385 | 244937_at   | 282  | 1.1 | 0.7 | 0.5 | 318  | 1.2 | 0.8 | 0.3 | ATCG01110 | NADH dehydrogenase subunit 7 (NDHH)                 |
| 386 | 251299_at   | 103  | 0.6 | 0.3 | 0.2 | 145  | 1.0 | 0.8 | 0.3 | AT3G61950 | bHLH protein family                                 |
| 387 | 266472_at   | 242  | 0.8 | 0.8 | 0.5 | 198  | 0.9 | 0.8 | 0.3 | AT2G31150 | expressed protein                                   |
| 388 | 266395_at   | 721  | 1.3 | 0.8 | 0.7 | 1305 | 1.0 | 0.8 | 0.3 | AT2G43100 | aconitase family                                    |
| 389 | 267172_at   | 5908 | 1.0 | 0.9 | 1.2 | 8063 | 1.0 | 0.6 | 0.3 | AT2G37660 | expressed protein                                   |
| 390 | 260081_at   | 2231 | 1.0 | 0.5 | 0.1 | 886  | 0.8 | 0.6 | 0.3 | AT1G78170 | expressed protein                                   |
| 391 | 257756_at   | 2372 | 0.9 | 0.8 | 0.8 | 3027 | 0.9 | 0.8 | 0.3 | AT3G18680 | aspartate/glutamate/uridylate kinase family         |
| 392 | 258464_at   | 74   | 1.3 | 0.8 | 0.8 | 101  | 0.6 | 0.4 | 0.3 | AT3G17360 | kinesin-related protein                             |
| 393 | 255516_at   | 1955 | 0.8 | 0.9 | 0.7 | 1731 | 1.3 | 0.7 | 0.3 | AT4G02270 | expressed protein                                   |
| 394 | 245049_at   | 498  | 0.8 | 0.8 | 0.8 | 682  | 0.8 | 0.6 | 0.3 | ATCG00050 | ribosomal protein S16 (RPS16)                       |
| 395 | 259789_at   | 276  | 0.9 | 0.8 | 0.8 | 450  | 1.1 | 0.6 | 0.3 | AT1G29395 | expressed protein                                   |
| 396 | 259640_at   | 749  | 1.1 | 0.7 | 0.7 | 826  | 0.9 | 0.4 | 0.3 | AT1G52400 | glycosyl hydrolase family 1, beta-glucosidase (BG1) |

|            |             |       |     |     |     |       |     |     |     |           |                                                                                                                                       |
|------------|-------------|-------|-----|-----|-----|-------|-----|-----|-----|-----------|---------------------------------------------------------------------------------------------------------------------------------------|
| <b>397</b> | 259930_at   | 54    | 2.0 | 1.6 | 1.6 | 63    | 0.9 | 0.7 | 0.3 | AT1G34355 | expressed protein                                                                                                                     |
| <b>398</b> | 253209_at   | 709   | 0.9 | 0.8 | 0.6 | 766   | 1.0 | 0.8 | 0.3 | AT4G34830 | pentatricopeptide (PPR) repeat-containing protein                                                                                     |
| <b>399</b> | 259658_at   | 629   | 0.9 | 0.7 | 0.8 | 686   | 1.1 | 0.8 | 0.3 | AT1G55370 | expressed protein                                                                                                                     |
| <b>400</b> | 265967_at   | 983   | 0.8 | 0.6 | 0.4 | 1017  | 0.9 | 0.7 | 0.3 | AT2G37450 | nodulin MtN21 family protein                                                                                                          |
| <b>401</b> | 261981_at   | 2524  | 0.8 | 0.8 | 0.6 | 2266  | 1.0 | 0.7 | 0.3 | AT1G33811 | GDSL-motif lipase/hydrolase protein                                                                                                   |
| <b>402</b> | 266372_at   | 152   | 0.7 | 1.0 | 0.4 | 229   | 1.3 | 0.8 | 0.3 | AT2G41310 | two-component response regulator 3 protein -related                                                                                   |
| <b>403</b> | 245008_at   | 768   | 0.7 | 0.8 | 0.8 | 1140  | 0.9 | 0.6 | 0.3 | ATCG00360 | photosystem I assembly protein ycf3                                                                                                   |
| <b>404</b> | 247603_at   | 135   | 1.1 | 1.2 | 1.3 | 187   | 0.9 | 0.4 | 0.3 | AT5G60930 | chromosome-associated kinesin, putative                                                                                               |
| <b>405</b> | 246075_at   | 178   | 0.8 | 0.8 | 0.5 | 214   | 1.0 | 0.7 | 0.3 | AT5G20410 | 1,2-diacylglycerol 3-beta-galactosyltransferase (UDP-galactose:diacylglycerol galactosyltransferase) (MGDG synthase) (MGD2), putative |
| <b>406</b> | 254862_at   | 675   | 0.9 | 0.6 | 0.5 | 1149  | 1.0 | 0.8 | 0.3 | AT4G12030 | bile acid:sodium symporter family                                                                                                     |
| <b>407</b> | 250109_at   | 6110  | 0.9 | 0.8 | 1.0 | 6268  | 0.9 | 0.5 | 0.3 | AT5G15230 | GASA4                                                                                                                                 |
| <b>408</b> | 261660_at   | 220   | 1.0 | 0.8 | 1.1 | 241   | 0.9 | 0.4 | 0.3 | AT1G18370 | kinesin heavy chain isolog -related                                                                                                   |
| <b>409</b> | 262682_at   | 910   | 1.1 | 0.6 | 0.4 | 1879  | 0.8 | 0.6 | 0.3 | AT1G75900 | family II extracellular lipase 3 (EXL3)                                                                                               |
| <b>410</b> | 262897_at   | 515   | 0.9 | 0.8 | 0.9 | 597   | 1.1 | 0.8 | 0.3 | AT1G59840 | expressed protein                                                                                                                     |
| <b>411</b> | 250059_at   | 1389  | 1.0 | 0.8 | 0.6 | 1325  | 1.4 | 0.8 | 0.3 | AT5G17820 | peroxidase, putative                                                                                                                  |
| <b>412</b> | 258708_at   | 561   | 1.0 | 0.9 | 1.2 | 375   | 0.9 | 0.6 | 0.3 | AT3G09580 | amine oxidase family                                                                                                                  |
| <b>413</b> | 248844_s_at | 2399  | 0.9 | 0.8 | 0.9 | 2529  | 1.0 | 0.4 | 0.3 | AT5G46900 | protease inhibitor/seed storage/lipid transfer protein (LTP) family                                                                   |
| <b>414</b> | 246998_at   | 1833  | 1.1 | 1.2 | 1.2 | 2594  | 1.3 | 0.6 | 0.3 | AT5G67370 | expressed protein                                                                                                                     |
| <b>415</b> | 247162_at   | 1230  | 0.8 | 0.7 | 0.7 | 1011  | 0.9 | 0.6 | 0.3 | AT5G65730 | xyloglucan endotransglycosylase, putative                                                                                             |
| <b>416</b> | 245816_at   | 166   | 1.0 | 0.8 | 0.6 | 195   | 0.6 | 0.4 | 0.3 | AT1G26210 | expressed protein                                                                                                                     |
| <b>417</b> | 255277_at   | 1224  | 0.8 | 0.6 | 0.4 | 1297  | 1.0 | 0.8 | 0.3 | AT4G04890 | homeodomain protein protodermal factor2 (PDF2)                                                                                        |
| <b>418</b> | 262376_at   | 1072  | 0.9 | 0.7 | 0.5 | 1005  | 1.0 | 0.7 | 0.3 | AT1G72970 | glucose-methanol-choline (GMC) oxidoreductase family                                                                                  |
| <b>419</b> | 252105_at   | 148   | 1.4 | 1.0 | 1.1 | 179   | 0.8 | 0.6 | 0.3 | AT3G51470 | protein phosphatase 2C (PP2C), putative                                                                                               |
| <b>420</b> | 247862_at   | 3538  | 1.0 | 0.9 | 1.0 | 4677  | 0.9 | 0.7 | 0.3 | AT5G58250 | unknown protein (sp P72777) -related                                                                                                  |
| <b>421</b> | 266790_at   | 1647  | 0.9 | 0.7 | 0.7 | 2213  | 1.0 | 0.6 | 0.3 | AT2G28950 | expansin, putative                                                                                                                    |
| <b>422</b> | 251374_at   | 170   | 0.5 | 0.7 | 0.5 | 188   | 0.8 | 0.6 | 0.3 | AT3G60390 | homeobox-leucine zipper protein HAT3                                                                                                  |
| <b>423</b> | 263544_at   | 107   | 0.8 | 0.7 | 0.6 | 197   | 1.5 | 0.8 | 0.3 | AT2G21590 | glucose-1-phosphate adenyltransferase, large subunit (ADP-glucose pyrophosphorylase), putative                                        |
| <b>424</b> | 250167_at   | 198   | 1.2 | 0.9 | 0.5 | 323   | 1.0 | 0.7 | 0.3 | AT5G15310 | myb family transcription factor                                                                                                       |
| <b>425</b> | 255587_at   | 1128  | 0.8 | 0.8 | 0.6 | 1529  | 1.1 | 0.8 | 0.3 | AT4G01480 | inorganic phosphatase -related                                                                                                        |
| <b>426</b> | 245546_at   | 129   | 1.0 | 0.9 | 0.9 | 245   | 0.9 | 0.4 | 0.3 | AT4G15290 | cellulose synthase - related                                                                                                          |
| <b>427</b> | 266357_at   | 104   | 1.1 | 1.4 | 1.6 | 172   | 1.1 | 0.6 | 0.3 | AT2G32290 | glycosyl hydrolase family 14 (beta-amylase)                                                                                           |
| <b>428</b> | 265400_at   | 11794 | 1.0 | 0.8 | 0.7 | 10210 | 0.8 | 0.5 | 0.3 | AT2G10940 | protease inhibitor/seed storage/lipid transfer protein (LTP) family                                                                   |
| <b>429</b> | 252688_at   | 444   | 0.9 | 0.9 | 0.9 | 438   | 1.0 | 0.8 | 0.3 | AT3G44020 | thylakoid lumenal P17.1 protein                                                                                                       |

|     |             |       |     |     |     |       |     |     |     |           |                                                            |
|-----|-------------|-------|-----|-----|-----|-------|-----|-----|-----|-----------|------------------------------------------------------------|
| 430 | 264240_at   | 449   | 0.5 | 0.5 | 0.7 | 731   | 1.0 | 0.7 | 0.3 | AT1G54820 | protein kinase family                                      |
| 431 | 257428_at   | 59    | 1.2 | 1.1 | 0.4 | 371   | 1.2 | 0.9 | 0.3 | AT1G78990 | acetyl-CoA:benzylalcohol acetyltransferase - related       |
| 432 | 261825_at   | 663   | 0.9 | 0.6 | 0.5 | 670   | 0.8 | 0.5 | 0.3 | AT1G11545 | xyloglucan endotransglycosylase, putative                  |
| 433 | 256130_at   | 866   | 0.9 | 0.8 | 0.9 | 929   | 1.0 | 0.7 | 0.3 | AT1G18170 | peptidylprolyl isomerase -related                          |
| 434 | 246403_at   | 522   | 1.1 | 0.8 | 0.7 | 719   | 0.9 | 1.5 | 0.3 | AT1G57590 | pectinacetylerase, putative                                |
| 435 | 246986_at   | 1110  | 0.7 | 0.5 | 0.3 | 1427  | 1.0 | 0.8 | 0.3 | AT5G67280 | leucine-rich repeat transmembrane protein kinase, putative |
| 436 | 252691_at   | 86    | 1.1 | 1.1 | 1.3 | 84    | 0.9 | 0.6 | 0.3 | AT3G44050 | kinesin-related protein                                    |
| 437 | 244966_at   | 360   | 0.7 | 0.9 | 0.9 | 663   | 0.9 | 0.7 | 0.3 | ATCG00600 | cytochrome b6 (PETG)                                       |
| 438 | 252011_at   | 898   | 0.8 | 0.7 | 0.9 | 1223  | 1.1 | 0.9 | 0.3 | AT3G52720 | carbonic anhydrase (CAH1)                                  |
| 439 | 264435_at   | 1021  | 1.2 | 1.1 | 1.2 | 1108  | 0.8 | 0.5 | 0.3 | AT1G10360 | glutathione transferase, putative                          |
| 440 | 256792_at   | 553   | 0.8 | 0.7 | 1.0 | 640   | 1.2 | 0.9 | 0.3 | AT3G22150 | pentatricopeptide (PPR) repeat-containing protein          |
| 441 | 252280_at   | 885   | 0.7 | 0.5 | 0.5 | 865   | 1.0 | 0.6 | 0.3 | AT3G49260 | SF16 -related protein                                      |
| 442 | 261927_at   | 211   | 0.7 | 0.6 | 0.4 | 140   | 1.3 | 0.8 | 0.3 | AT1G22500 | RING-H2 zinc finger protein ATL5 -related                  |
| 443 | 246855_at   | 1206  | 0.7 | 0.7 | 0.7 | 1601  | 1.1 | 0.5 | 0.3 | AT5G26280 | expressed protein                                          |
| 444 | 245007_at   | 6407  | 0.9 | 0.6 | 0.4 | 4724  | 1.1 | 0.7 | 0.3 | ATCG00350 | photosystem I P700 apoprotein A1 (PSAA)                    |
| 445 | 246038_s_at | 159   | 1.0 | 1.2 | 1.1 | 414   | 1.2 | 0.6 | 0.3 | AT5G19470 | MutT/nudix family protein                                  |
| 446 | 264037_at   | 634   | 0.7 | 0.9 | 1.0 | 999   | 1.1 | 0.8 | 0.3 | AT2G03750 | sulfotransferase family                                    |
| 447 | 262288_at   | 3705  | 0.9 | 0.9 | 1.1 | 3993  | 1.0 | 0.7 | 0.3 | AT1G70760 | expressed protein                                          |
| 448 | 263227_at   | 529   | 1.0 | 1.0 | 0.6 | 567   | 1.0 | 1.1 | 0.3 | AT1G30750 | expressed protein                                          |
| 449 | 250198_at   | 211   | 0.9 | 0.8 | 1.1 | 320   | 0.9 | 0.8 | 0.3 | AT5G14100 | ABC transporter family protein                             |
| 450 | 262637_at   | 784   | 0.9 | 1.0 | 0.9 | 1119  | 1.1 | 0.6 | 0.3 | AT1G06640 | 2-oxoglutarate-dependent dioxygenase, putative             |
| 451 | 260693_at   | 1487  | 0.7 | 0.5 | 1.0 | 1444  | 1.0 | 0.5 | 0.3 | AT1G32450 | peptide transporter PTR2-B -related                        |
| 452 | 259375_at   | 15157 | 1.0 | 0.8 | 0.7 | 14503 | 1.0 | 0.7 | 0.3 | AT3G16370 | GDSL-motif lipase/hydrolase protein                        |
| 453 | 259308_at   | 1424  | 0.9 | 0.9 | 0.8 | 1607  | 0.9 | 0.9 | 0.3 | AT3G05180 | GDSL-motif lipase/hydrolase protein                        |
| 454 | 247386_at   | 595   | 1.0 | 0.7 | 0.7 | 1036  | 1.0 | 0.8 | 0.3 | AT5G63430 | expressed protein                                          |
| 455 | 259381_s_at | 6587  | 1.0 | 0.8 | 0.7 | 7626  | 1.1 | 0.6 | 0.3 | AT3G16390 | jacalin lectin family                                      |
| 456 | 252943_at   | 5346  | 1.0 | 0.7 | 0.5 | 6656  | 1.1 | 0.7 | 0.3 | AT4G39330 | mannitol dehydrogenase, putative                           |
| 457 | 261518_at   | 3293  | 1.0 | 0.8 | 0.9 | 3376  | 1.1 | 0.7 | 0.3 | AT1G71695 | peroxidase, putative                                       |
| 458 | 251261_at   | 671   | 0.9 | 0.6 | 0.7 | 708   | 0.9 | 0.6 | 0.3 | AT3G62110 | polygalacturonase, putative                                |
| 459 | 266424_at   | 159   | 1.2 | 0.9 | 0.8 | 191   | 1.0 | 0.5 | 0.3 | AT2G41330 | expressed protein                                          |
| 460 | 258554_at   | 1712  | 0.9 | 0.8 | 0.8 | 1867  | 1.0 | 0.7 | 0.3 | AT3G06980 | DEAD/DEAH box helicase, putative                           |
| 461 | 255236_at   | 303   | 1.1 | 0.9 | 1.1 | 310   | 0.9 | 0.5 | 0.3 | AT4G05520 | calcium-binding EF-hand family protein                     |
| 462 | 260041_at   | 318   | 0.6 | 0.7 | 0.6 | 353   | 1.1 | 0.6 | 0.3 | AT1G68780 | leucine rich repeat protein family                         |
| 463 | 266941_at   | 574   | 1.0 | 0.7 | 0.7 | 642   | 0.9 | 0.7 | 0.3 | AT2G18980 | peroxidase, putative                                       |
| 464 | 246434_at   | 1113  | 0.9 | 1.0 | 0.9 | 1774  | 1.0 | 0.7 | 0.3 | AT5G17520 | root cap 1 (RCP1)                                          |
| 465 | 257072_at   | 1554  | 0.9 | 0.7 | 0.7 | 1814  | 0.8 | 0.5 | 0.3 | AT3G14220 | GDSL-motif lipase/hydrolase protein                        |
| 466 | 254772_at   | 507   | 0.4 | 0.7 | 0.3 | 327   | 1.4 | 0.7 | 0.3 | AT4G13390 | proline-rich protein family                                |

|     |             |      |     |     |     |      |     |     |     |           |                                                                            |
|-----|-------------|------|-----|-----|-----|------|-----|-----|-----|-----------|----------------------------------------------------------------------------|
| 467 | 257041_at   | 783  | 0.6 | 0.7 | 0.5 | 855  | 1.1 | 0.6 | 0.3 | AT3G28550 | proline-rich protein family                                                |
| 468 | 253403_at   | 303  | 1.4 | 1.0 | 1.2 | 400  | 0.8 | 0.4 | 0.3 | AT4G32830 | protein kinase, putative                                                   |
| 469 | 260107_at   | 809  | 0.9 | 1.0 | 1.0 | 999  | 0.9 | 0.7 | 0.3 | AT1G66430 | pfkB type carbohydrate kinase protein family                               |
| 470 | 251931_at   | 242  | 0.8 | 0.8 | 1.1 | 421  | 1.1 | 0.7 | 0.3 | AT3G53950 | expressed protein                                                          |
| 471 | 258920_at   | 2282 | 0.8 | 0.6 | 0.6 | 1810 | 1.0 | 0.8 | 0.3 | AT3G10520 | class 2 non-symbiotic hemoglobin                                           |
| 472 | 254150_at   | 516  | 0.8 | 0.7 | 0.7 | 341  | 1.0 | 0.7 | 0.3 | AT4G24350 | expressed protein                                                          |
| 473 | 256980_at   | 136  | 0.9 | 0.7 | 0.5 | 96   | 0.9 | 0.8 | 0.3 | AT3G26932 | hypothetical protein                                                       |
| 474 | 246313_at   | 251  | 0.9 | 1.0 | 1.3 | 289  | 1.1 | 0.8 | 0.3 | AT1G31920 | pentatricopeptide (PPR) repeat-containing protein                          |
| 475 | 261309_at   | 2304 | 1.0 | 0.8 | 1.0 | 3821 | 1.1 | 0.7 | 0.3 | AT1G48600 | phosphoethanolamine N-methyltransferase -related                           |
| 476 | 258232_at   | 170  | 1.1 | 0.9 | 0.8 | 271  | 1.0 | 0.7 | 0.3 | AT3G27750 | hypothetical protein                                                       |
| 477 | 255779_at   | 919  | 1.0 | 1.0 | 0.8 | 1074 | 0.9 | 0.8 | 0.3 | AT1G18650 | glycosyl hydrolase family 17                                               |
| 478 | 257750_at   | 237  | 0.7 | 0.8 | 1.0 | 273  | 1.0 | 0.5 | 0.3 | AT3G18800 | expressed protein                                                          |
| 479 | 254163_s_at | 1825 | 1.0 | 1.0 | 1.1 | 2455 | 1.0 | 0.6 | 0.3 | AT4G24340 | expressed protein                                                          |
| 480 | 258675_at   | 799  | 1.1 | 0.7 | 0.9 | 1535 | 1.1 | 0.7 | 0.3 | AT3G08770 | lipid transfer protein 6 (ltp6)                                            |
| 481 | 259632_at   | 447  | 0.6 | 0.6 | 0.5 | 1267 | 1.1 | 0.8 | 0.3 | AT1G56430 | nicotianamine synthase, putative                                           |
| 482 | 247134_at   | 148  | 1.2 | 1.0 | 1.0 | 154  | 1.1 | 0.3 | 0.3 | AT5G66230 | expressed protein                                                          |
| 483 | 244995_at   | 294  | 1.0 | 0.8 | 1.0 | 343  | 1.2 | 0.8 | 0.3 | ATCG00150 | ATP synthase CF0 A chain (ATPI)                                            |
| 484 | 264147_at   | 234  | 1.1 | 0.8 | 0.3 | 484  | 1.1 | 0.8 | 0.3 | AT1G02205 | CER1 protein                                                               |
| 485 | 256678_at   | 1745 | 1.1 | 1.1 | 1.3 | 2999 | 0.9 | 0.6 | 0.3 | AT3G52380 | 33 kDa ribonucleoprotein, chloroplast (RNA-binding protein cp33), putative |
| 486 | 247684_at   | 22   | 2.9 | 0.9 | 0.3 | 171  | 1.4 | 0.3 | 0.3 | AT5G59670 | leucine rich repeat protein kinase, putative                               |
| 487 | 254609_at   | 1620 | 1.1 | 0.8 | 0.8 | 1137 | 0.9 | 0.6 | 0.3 | AT4G18970 | GDSL-motif lipase/hydrolase protein                                        |
| 488 | 253753_at   | 489  | 1.1 | 0.8 | 0.9 | 876  | 1.2 | 0.6 | 0.3 | AT4G29030 | glycine-rich protein                                                       |
| 489 | 248153_at   | 1127 | 0.8 | 0.7 | 0.7 | 1884 | 1.0 | 0.8 | 0.3 | AT5G54250 | cyclic nucleotide-regulated ion channel (CNGC4)                            |
| 490 | 244969_at   | 2375 | 0.8 | 0.9 | 0.8 | 2426 | 1.0 | 0.7 | 0.3 | ATCG00650 | ribosomal protein S18 (RPS18)                                              |
| 491 | 263498_at   | 127  | 1.1 | 1.1 | 0.6 | 109  | 1.1 | 1.1 | 0.3 | AT2G42610 | expressed protein                                                          |
| 492 | 252954_at   | 694  | 0.9 | 0.8 | 0.8 | 1083 | 1.1 | 0.7 | 0.3 | AT4G38660 | thaumatin-like protein, putative                                           |
| 493 | 267126_s_at | 1188 | 0.9 | 1.0 | 1.0 | 1186 | 0.9 | 0.6 | 0.3 | AT2G23590 | hydrolase, alpha/beta fold family                                          |
| 494 | 261768_at   | 344  | 0.4 | 0.3 | 0.5 | 577  | 1.4 | 1.1 | 0.3 | AT1G15550 | gibberellin 3-beta-dioxygenase (gibberellin 3 beta-hydroxylase) (GA4)      |
| 495 | 262539_at   | 1673 | 0.9 | 0.6 | 0.5 | 1531 | 1.0 | 0.8 | 0.3 | AT1G17200 | expressed integral membrane protein common family                          |
| 496 | 260685_at   | 443  | 1.0 | 0.9 | 1.0 | 640  | 1.0 | 0.7 | 0.3 | AT1G17650 | expressed protein                                                          |
| 497 | 257645_at   | 119  | 0.9 | 0.4 | 0.4 | 207  | 0.9 | 0.7 | 0.3 | AT3G25790 | expressed protein                                                          |
| 498 | 264821_at   | 100  | 1.0 | 0.8 | 0.9 | 135  | 1.5 | 0.6 | 0.3 | AT1G03470 | expressed protein                                                          |
| 499 | 266608_at   | 1563 | 1.1 | 0.9 | 1.0 | 2087 | 1.0 | 0.8 | 0.3 | AT2G35500 | shikimate kinase-related                                                   |
| 500 | 266489_at   | 337  | 1.0 | 0.9 | 1.0 | 503  | 0.9 | 0.5 | 0.3 | AT2G35190 | expressed protein                                                          |
| 501 | 253754_at   | 6129 | 1.0 | 0.8 | 0.6 | 6063 | 1.0 | 0.7 | 0.3 | AT4G29020 | putative glycine-rich protein 5                                            |
| 502 | 256383_at   | 1372 | 0.8 | 0.8 | 0.9 | 1563 | 1.0 | 0.9 | 0.3 | AT1G66820 | glycine-rich protein                                                       |

|     |           |       |     |     |     |       |     |     |     |           |                                                                                                                |
|-----|-----------|-------|-----|-----|-----|-------|-----|-----|-----|-----------|----------------------------------------------------------------------------------------------------------------|
| 503 | 265704_at | 2522  | 0.9 | 1.0 | 0.9 | 3084  | 0.9 | 0.8 | 0.3 | AT2G03420 | expressed protein                                                                                              |
| 504 | 258800_at | 1893  | 0.9 | 0.8 | 0.8 | 2803  | 0.9 | 0.8 | 0.3 | AT3G04550 | expressed protein                                                                                              |
| 505 | 249120_at | 3207  | 0.9 | 0.9 | 1.1 | 2955  | 1.0 | 0.7 | 0.3 | AT5G43750 | expressed protein                                                                                              |
| 506 | 255676_at | 589   | 0.9 | 0.9 | 1.1 | 1282  | 1.1 | 0.8 | 0.3 | AT4G00490 | glycosyl hydrolase family 14 (beta-amylase)                                                                    |
| 507 | 245357_at | 2233  | 1.1 | 0.9 | 1.1 | 2758  | 1.0 | 0.7 | 0.3 | AT4G17560 | ribosomal protein L19, putative                                                                                |
| 508 | 264007_at | 3552  | 1.0 | 0.7 | 0.5 | 3125  | 0.9 | 0.6 | 0.3 | AT2G21140 | proline-rich protein family                                                                                    |
| 509 | 264343_at | 274   | 1.0 | 1.1 | 0.7 | 346   | 1.0 | 0.6 | 0.3 | AT1G11850 | glycine-rich protein                                                                                           |
| 510 | 252163_at | 24    | 1.4 | 0.9 | 0.9 | 131   | 1.1 | 0.4 | 0.3 | AT3G50610 | hypothetical protein                                                                                           |
| 511 | 249866_at | 344   | 1.1 | 0.9 | 1.0 | 586   | 1.0 | 0.9 | 0.3 | AT5G23010 | 2-isopropylmalate synthase-related; homocitrate synthase-like                                                  |
| 512 | 254863_at | 336   | 0.8 | 0.9 | 1.0 | 469   | 1.0 | 0.7 | 0.3 | AT4G11980 | MutT/nudix family protein                                                                                      |
| 513 | 246275_at | 755   | 1.0 | 0.8 | 1.1 | 1004  | 1.2 | 0.7 | 0.3 | AT4G36540 | expressed protein                                                                                              |
| 514 | 257297_at | 1278  | 0.8 | 0.8 | 0.9 | 1287  | 1.0 | 0.7 | 0.3 | AT3G28040 | leucine-rich repeat transmembrane protein kinase, putative                                                     |
| 515 | 254119_at | 3383  | 0.6 | 0.5 | 0.5 | 3461  | 1.0 | 0.7 | 0.3 | AT4G24780 | polysaccharide lyase family 1 (pectate lyase)                                                                  |
| 516 | 252318_at | 3993  | 1.1 | 0.9 | 1.1 | 5210  | 1.0 | 0.7 | 0.3 | AT3G48730 | glutamate-1-semialdehyde 2,1-aminomutase 2 (GSA 2)<br>(glutamate-1-semialdehyde aminotransferase 2) (GSA-AT 2) |
| 517 | 262730_at | 133   | 1.4 | 0.6 | 0.8 | 127   | 0.9 | 0.8 | 0.3 | AT1G16390 | transporter - related                                                                                          |
| 518 | 248224_at | 2356  | 0.9 | 0.9 | 1.0 | 2180  | 1.0 | 0.7 | 0.3 | AT5G53490 | thylakoid lumenal 17.4 kD pentapeptide repeat family protein, chloroplast precursor                            |
| 519 | 249408_at | 117   | 1.0 | 0.5 | 0.4 | 147   | 0.9 | 0.7 | 0.3 | AT5G40330 | myb-related protein                                                                                            |
| 520 | 252468_at | 6236  | 0.7 | 0.6 | 0.6 | 9446  | 1.0 | 0.8 | 0.3 | AT3G46970 | starch phosphorylase, putative                                                                                 |
| 521 | 249685_at | 417   | 0.9 | 1.0 | 1.1 | 452   | 1.1 | 0.7 | 0.3 | AT5G36120 | expressed protein                                                                                              |
| 522 | 266225_at | 4184  | 0.8 | 0.8 | 0.8 | 7620  | 1.0 | 0.8 | 0.3 | AT2G28900 | membrane channel protein -related                                                                              |
| 523 | 250255_at | 776   | 0.8 | 0.9 | 1.1 | 1108  | 1.2 | 0.9 | 0.3 | AT5G13730 | sigma-related factor (gb AAC97954.1)                                                                           |
| 524 | 252971_at | 16008 | 1.0 | 0.7 | 0.6 | 17265 | 1.0 | 0.7 | 0.3 | AT4G38770 | proline-rich protein family                                                                                    |
| 525 | 258719_at | 377   | 0.8 | 0.6 | 0.5 | 586   | 1.1 | 0.8 | 0.3 | AT3G09540 | polysaccharide lyase family 1 (pectate lyase)                                                                  |
| 526 | 259327_at | 7260  | 0.8 | 0.6 | 0.5 | 7732  | 1.1 | 0.7 | 0.3 | AT3G16460 | jacalin lectin family                                                                                          |
| 527 | 245524_at | 339   | 1.3 | 0.9 | 0.6 | 657   | 0.9 | 0.7 | 0.3 | AT4G15920 | nodulin MtN3 family protein                                                                                    |
| 528 | 263701_at | 544   | 1.0 | 1.2 | 1.2 | 756   | 1.0 | 0.6 | 0.3 | AT1G31160 | protein kinase C inhibitor (Zinc-binding protein) -related                                                     |
| 529 | 255652_at | 110   | 0.9 | 0.8 | 0.9 | 159   | 1.0 | 0.8 | 0.3 | AT4G00950 | expressed protein                                                                                              |
| 530 | 267595_at | 146   | 0.9 | 0.7 | 0.9 | 323   | 1.3 | 0.8 | 0.3 | AT2G32990 | glycosyl hydrolase family 9                                                                                    |
| 531 | 251746_at | 448   | 0.8 | 0.6 | 0.6 | 468   | 0.9 | 0.5 | 0.3 | AT3G56060 | glucose-methanol-choline (GMC) oxidoreductase family                                                           |
| 532 | 254669_at | 1702  | 1.0 | 0.8 | 1.0 | 2013  | 1.0 | 0.7 | 0.3 | AT4G18370 | protease HhoA, chloroplast precursor                                                                           |
| 533 | 245778_at | 513   | 1.1 | 0.9 | 1.0 | 632   | 1.0 | 0.8 | 0.3 | AT1G73530 | RNA recognition motif (RRM) - containing protein                                                               |
| 534 | 266191_at | 310   | 0.7 | 0.8 | 0.6 | 220   | 0.9 | 0.4 | 0.3 | AT2G39040 | peroxidase, putative                                                                                           |
| 535 | 266162_at | 139   | 0.9 | 1.0 | 0.7 | 227   | 0.7 | 0.4 | 0.3 | AT2G28160 | bHLH protein family                                                                                            |
| 536 | 249850_at | 401   | 0.7 | 0.6 | 0.7 | 2118  | 0.9 | 0.8 | 0.3 | AT5G23240 | DnaJ protein family                                                                                            |
| 537 | 249347_at | 365   | 0.8 | 0.8 | 0.6 | 681   | 1.0 | 0.7 | 0.3 | AT5G40830 | expressed protein                                                                                              |

|     |           |      |     |     |     |      |     |     |     |           |                                                                                                  |
|-----|-----------|------|-----|-----|-----|------|-----|-----|-----|-----------|--------------------------------------------------------------------------------------------------|
| 538 | 247889_at | 1592 | 1.0 | 0.9 | 1.0 | 1571 | 1.1 | 0.9 | 0.3 | AT5G57930 | expressed protein                                                                                |
| 539 | 260260_at | 416  | 0.7 | 0.7 | 0.9 | 397  | 1.0 | 0.7 | 0.3 | AT1G68540 | oxidoreductase family                                                                            |
| 540 | 263912_at | 1899 | 0.8 | 0.8 | 0.8 | 3657 | 1.1 | 0.7 | 0.3 | AT2G36390 | 1,4-alpha-glucan branching enzyme (starch branching enzyme class II/sbe2-1)                      |
| 541 | 253317_at | 439  | 0.5 | 0.4 | 0.4 | 823  | 1.1 | 0.8 | 0.3 | AT4G33960 | expressed protein                                                                                |
| 542 | 244979_at | 3672 | 0.8 | 0.7 | 0.7 | 3848 | 1.0 | 0.6 | 0.3 | ATCG00750 | ribosomal protein S11 (RPS11)                                                                    |
| 543 | 262736_at | 262  | 1.0 | 1.2 | 1.1 | 753  | 1.3 | 0.8 | 0.3 | AT1G28570 | lipase, putative                                                                                 |
| 544 | 251244_at | 292  | 1.1 | 1.0 | 0.9 | 361  | 0.9 | 0.6 | 0.3 | AT3G62060 | pectinacetyltransferase family                                                                   |
| 545 | 253585_at | 679  | 1.0 | 0.7 | 0.8 | 592  | 1.0 | 1.0 | 0.3 | AT4G30720 | expressed protein                                                                                |
| 546 | 263793_at | 249  | 1.0 | 0.7 | 0.5 | 254  | 0.9 | 0.7 | 0.3 | AT2G24630 | glycosyltransferase family 2                                                                     |
| 547 | 256368_at | 76   | 1.1 | 1.4 | 1.4 | 192  | 1.1 | 0.9 | 0.3 | AT1G66800 | cinnamyl-alcohol dehydrogenase (CAD) family                                                      |
| 548 | 247586_at | 694  | 0.9 | 0.9 | 0.8 | 596  | 1.1 | 0.6 | 0.3 | AT5G60660 | major intrinsic protein (MIP) family                                                             |
| 549 | 266456_at | 332  | 1.0 | 0.5 | 0.6 | 275  | 1.0 | 0.8 | 0.3 | AT2G22770 | bHLH transcription factor -related                                                               |
| 550 | 257005_at | 318  | 1.0 | 0.9 | 1.0 | 359  | 0.9 | 0.4 | 0.3 | AT3G14190 | expressed protein                                                                                |
| 551 | 248920_at | 1095 | 1.1 | 0.9 | 1.1 | 1141 | 1.0 | 0.8 | 0.3 | AT5G45930 | magnesium-chelatase, subunit chlI, chloroplast (Mg-protoporphyrin IX chelatase) (CHLI), putative |
| 552 | 247760_at | 584  | 1.0 | 1.0 | 0.9 | 680  | 1.0 | 0.8 | 0.3 | AT5G59130 | subtilisin-like serine protease                                                                  |
| 553 | 250172_at | 143  | 1.4 | 1.0 | 1.4 | 238  | 0.9 | 0.5 | 0.3 | AT5G14330 | expressed protein                                                                                |
| 554 | 256960_at | 423  | 0.9 | 0.5 | 0.6 | 581  | 0.9 | 0.8 | 0.3 | AT3G13510 | expressed protein                                                                                |
| 555 | 253218_at | 934  | 0.7 | 0.6 | 0.6 | 1270 | 1.0 | 0.8 | 0.3 | AT4G34980 | subtilisin-like serine protease                                                                  |
| 556 | 265312_at | 215  | 1.1 | 1.0 | 0.8 | 267  | 1.1 | 0.8 | 0.3 | AT2G20240 | expressed protein                                                                                |
| 557 | 248772_at | 236  | 0.9 | 0.7 | 0.7 | 208  | 0.9 | 0.9 | 0.3 | AT5G47800 | photoreceptor-interacting protein-related                                                        |
| 558 | 256336_at | 2841 | 1.1 | 1.3 | 1.6 | 3695 | 1.0 | 0.7 | 0.3 | AT1G72030 | GCN5-related N-acetyltransferase (GNAT) family                                                   |
| 559 | 246303_at | 1066 | 1.0 | 1.1 | 1.0 | 1384 | 0.8 | 0.9 | 0.3 | AT3G51870 | putative carrier protein                                                                         |
| 560 | 259788_at | 8410 | 1.0 | 0.8 | 0.6 | 9193 | 0.9 | 0.7 | 0.3 | AT1G29670 | GDSL-motif lipase/hydrolase protein                                                              |
| 561 | 265699_at | 373  | 0.9 | 1.2 | 1.5 | 745  | 1.0 | 0.9 | 0.3 | AT2G03550 | expressed protein                                                                                |
| 562 | 252965_at | 894  | 0.4 | 0.4 | 0.6 | 284  | 1.0 | 0.7 | 0.3 | AT4G38860 | auxin-induced (indole-3-acetic acid induced) protein, putative                                   |
| 563 | 264611_at | 1201 | 1.1 | 0.7 | 0.6 | 1702 | 1.0 | 0.7 | 0.3 | AT1G04680 | polysaccharide lyase family 1 (pectate lyase)                                                    |
| 564 | 257533_at | 907  | 0.9 | 0.9 | 1.0 | 1272 | 1.0 | 0.7 | 0.3 | AT3G10840 | hydrolase, alpha/beta fold family                                                                |
| 565 | 266575_at | 1141 | 1.0 | 0.9 | 1.1 | 1397 | 1.0 | 0.7 | 0.3 | AT2G24060 | chloroplast initiation factor 3 -related                                                         |
| 566 | 258080_at | 358  | 0.6 | 0.8 | 0.6 | 471  | 1.4 | 0.9 | 0.3 | AT3G25930 | expressed protein                                                                                |
| 567 | 256228_at | 4230 | 1.0 | 0.9 | 1.0 | 7372 | 0.9 | 0.6 | 0.3 | AT1G56190 | phosphoglycerate kinase -related                                                                 |
| 568 | 248380_at | 2687 | 0.9 | 0.8 | 0.8 | 3680 | 1.0 | 0.7 | 0.3 | AT5G51820 | phosphoglucomutase (emb CAB64725.1)                                                              |
| 569 | 267578_at | 597  | 0.8 | 0.8 | 0.9 | 797  | 1.1 | 0.7 | 0.3 | AT2G30695 | expressed protein                                                                                |
| 570 | 255440_at | 2206 | 1.0 | 1.1 | 1.2 | 3672 | 1.0 | 0.7 | 0.3 | AT4G02530 | chloroplast thylakoid lumen protein                                                              |
| 571 | 251669_at | 322  | 1.1 | 1.0 | 1.1 | 354  | 0.9 | 1.0 | 0.3 | AT3G57180 | expressed protein                                                                                |
| 572 | 245050_at | 1905 | 0.9 | 0.9 | 0.8 | 2442 | 0.8 | 0.7 | 0.3 | ATCG00070 | photosystem II protein K (PSBK)                                                                  |
| 573 | 255613_at | 106  | 1.1 | 0.9 | 1.0 | 113  | 0.7 | 1.0 | 0.3 | AT4G01270 | C3HC4-type zinc finger protein family                                                            |



|            |             |      |     |     |     |      |     |     |     |           |                                                                            |
|------------|-------------|------|-----|-----|-----|------|-----|-----|-----|-----------|----------------------------------------------------------------------------|
| <b>574</b> | 250006_at   | 1621 | 1.0 | 1.0 | 1.3 | 2351 | 1.0 | 0.7 | 0.3 | AT5G18660 | isoflavone reductase-related                                               |
| <b>575</b> | 263736_at   | 4055 | 0.9 | 0.9 | 1.0 | 5933 | 1.0 | 0.8 | 0.3 | AT1G60000 | 29 kDa ribonucleoprotein, chloroplast (RNA-binding protein cp29), putative |
| <b>576</b> | 263597_at   | 872  | 0.9 | 0.8 | 0.9 | 977  | 1.0 | 0.9 | 0.3 | AT2G01870 | expressed protein                                                          |
| <b>577</b> | 252366_at   | 3661 | 1.0 | 0.9 | 1.2 | 4823 | 0.9 | 0.6 | 0.3 | AT3G48420 | haloacid dehalogenase-like hydrolase family                                |
| <b>578</b> | 252863_at   | 4082 | 0.8 | 0.6 | 0.5 | 6912 | 1.1 | 0.8 | 0.3 | AT4G39800 | myo-inositol-1-phosphate synthase                                          |
| <b>579</b> | 252181_at   | 6135 | 0.9 | 1.0 | 1.2 | 5797 | 1.1 | 0.7 | 0.3 | AT3G50685 | expressed protein                                                          |
| <b>580</b> | 248287_at   | 2212 | 0.9 | 0.9 | 1.0 | 2019 | 1.1 | 0.8 | 0.3 | AT5G52970 | thylakoid lumen 15.0-kDa protein                                           |
| <b>581</b> | 249762_at   | 318  | 0.9 | 0.9 | 0.8 | 438  | 1.0 | 0.8 | 0.3 | AT5G24000 | expressed protein                                                          |
| <b>582</b> | 267057_at   | 1369 | 1.0 | 1.1 | 1.2 | 1799 | 0.9 | 0.7 | 0.4 | AT2G32500 | expressed protein                                                          |
| <b>583</b> | 251031_at   | 5820 | 1.2 | 1.2 | 1.3 | 4554 | 1.0 | 0.8 | 0.4 | AT5G02120 | one helix protein (OHP)                                                    |
| <b>584</b> | 259207_at   | 351  | 0.9 | 1.0 | 1.2 | 389  | 1.0 | 0.8 | 0.4 | AT3G09050 | expressed protein                                                          |
| <b>585</b> | 254198_at   | 1272 | 1.1 | 0.8 | 0.8 | 1525 | 0.9 | 0.7 | 0.4 | AT4G24090 | expressed protein                                                          |
| <b>586</b> | 254794_at   | 1474 | 1.1 | 1.1 | 1.0 | 1666 | 0.8 | 0.8 | 0.4 | AT4G12970 | expressed protein                                                          |
| <b>587</b> | 253050_at   | 633  | 0.9 | 0.6 | 0.4 | 538  | 0.8 | 0.7 | 0.4 | AT4G37450 | arabinogalactan-protein (AGP18)                                            |
| <b>588</b> | 261859_at   | 547  | 1.1 | 0.8 | 0.9 | 609  | 0.7 | 0.5 | 0.4 | AT1G50490 | ubiquitin-conjugating enzyme (UBC20)                                       |
| <b>589</b> | 263985_at   | 1080 | 0.9 | 0.8 | 1.1 | 1259 | 1.3 | 0.5 | 0.4 | AT2G42750 | DnaJ protein family                                                        |
| <b>590</b> | 245712_at   | 513  | 0.8 | 0.7 | 0.8 | 536  | 1.0 | 0.6 | 0.4 | AT5G04360 | pullulanase (starch debranching enzyme), putative                          |
| <b>591</b> | 245388_at   | 3776 | 1.0 | 1.0 | 0.9 | 3595 | 1.0 | 0.8 | 0.4 | AT4G16410 | expressed protein                                                          |
| <b>592</b> | 266321_at   | 139  | 0.8 | 0.6 | 0.6 | 229  | 0.9 | 0.8 | 0.4 | AT2G46660 | cytochrome P450, putative                                                  |
| <b>593</b> | 248943_s_at | 190  | 0.9 | 0.8 | 0.9 | 294  | 0.8 | 0.6 | 0.4 | AT5G45490 | expressed protein                                                          |
| <b>594</b> | 252272_at   | 1935 | 0.8 | 0.5 | 0.3 | 1059 | 0.9 | 0.6 | 0.4 | AT3G49670 | leucine-rich repeat transmembrane protein kinase, putative                 |
| <b>595</b> | 245891_at   | 1027 | 1.0 | 0.9 | 1.1 | 991  | 0.9 | 0.5 | 0.4 | AT5G09220 | amino acid permease 2 (AAP2)                                               |
| <b>596</b> | 263927_s_at | 311  | 1.0 | 0.8 | 1.0 | 316  | 1.0 | 0.7 | 0.4 | AT2G21890 | mannitol dehydrogenase, putative                                           |
| <b>597</b> | 264271_at   | 756  | 1.2 | 1.1 | 0.5 | 616  | 1.1 | 0.7 | 0.4 | AT1G60270 | glycosyl hydrolase family 1                                                |
| <b>598</b> | 261821_at   | 2082 | 0.8 | 1.0 | 1.3 | 1452 | 1.1 | 0.7 | 0.4 | AT1G11530 | thioredoxin family                                                         |
| <b>599</b> | 253208_at   | 2116 | 0.9 | 0.8 | 0.8 | 2459 | 0.9 | 0.8 | 0.4 | AT4G34820 | expressed protein                                                          |
| <b>600</b> | 253421_at   | 4661 | 0.8 | 0.8 | 1.0 | 4767 | 1.1 | 0.8 | 0.4 | AT4G32340 | expressed protein                                                          |
| <b>601</b> | 262309_at   | 1857 | 0.7 | 0.8 | 1.4 | 1574 | 0.9 | 0.7 | 0.4 | AT1G70820 | phosphoglucomutase -related                                                |
| <b>602</b> | 261806_at   | 755  | 0.9 | 0.8 | 0.7 | 1250 | 0.8 | 0.5 | 0.4 | AT1G30510 | ferredoxin--NADP(+) reductase (adrenodoxin reductase), putative            |
| <b>603</b> | 267481_at   | 260  | 0.8 | 0.8 | 0.8 | 292  | 1.0 | 0.8 | 0.4 | AT2G02780 | leucine-rich repeat transmembrane protein kinase, putative                 |
| <b>604</b> | 262516_at   | 396  | 0.9 | 0.7 | 0.5 | 482  | 1.3 | 0.8 | 0.4 | AT1G17190 | glutathione transferase, putative                                          |
| <b>605</b> | 250371_at   | 2549 | 0.9 | 0.9 | 1.0 | 3236 | 0.9 | 0.7 | 0.4 | AT5G11450 | oxygen-evolving complex related protein                                    |
| <b>606</b> | 259596_at   | 461  | 1.0 | 0.7 | 0.7 | 425  | 1.0 | 0.8 | 0.4 | AT1G28130 | auxin-regulated GH3 protein -related                                       |
| <b>607</b> | 245133_at   | 220  | 0.9 | 0.8 | 0.7 | 233  | 0.8 | 0.7 | 0.4 | AT2G45310 | nucleotide sugar epimerase family                                          |
| <b>608</b> | 264270_at   | 305  | 1.1 | 1.2 | 0.8 | 431  | 1.0 | 0.7 | 0.4 | AT1G60260 | glycosyl hydrolase family 1                                                |
| <b>609</b> | 254328_at   | 813  | 1.0 | 0.9 | 1.1 | 1077 | 1.0 | 0.8 | 0.4 | AT4G22570 | adenine phosphoribosyltransferase (EC 2.4.2.7) - like protein              |

|     |             |       |     |     |     |       |     |     |     |           |                                                                         |
|-----|-------------|-------|-----|-----|-----|-------|-----|-----|-----|-----------|-------------------------------------------------------------------------|
| 610 | 263773_at   | 453   | 1.0 | 0.9 | 0.9 | 449   | 1.0 | 0.8 | 0.4 | AT2G21370 | xylulose kinase -related                                                |
| 611 | 263628_at   | 1865  | 1.0 | 0.8 | 0.8 | 2283  | 1.0 | 0.7 | 0.4 | AT2G04780 | fasciclin-like arabinogalactan-protein (FLA7)                           |
| 612 | 252876_at   | 1779  | 1.0 | 1.0 | 1.2 | 2091  | 1.1 | 0.7 | 0.4 | AT4G39970 | haloacid dehalogenase-like hydrolase family                             |
| 613 | 253985_at   | 318   | 0.8 | 0.8 | 0.5 | 389   | 1.1 | 0.5 | 0.4 | AT4G26220 | caffeoyl-CoA 3-O-methyltransferase, putative                            |
| 614 | 249813_at   | 70    | 1.3 | 1.4 | 1.2 | 143   | 1.4 | 0.7 | 0.4 | AT5G23940 | hydroxycinnamoyl benzoyltransferase-related                             |
| 615 | 261793_at   | 1872  | 1.0 | 1.1 | 1.3 | 2687  | 1.0 | 0.7 | 0.4 | AT1G16080 | expressed protein                                                       |
| 616 | 254332_at   | 285   | 0.9 | 0.4 | 0.2 | 270   | 1.1 | 0.9 | 0.4 | AT4G22730 | leucine-rich repeat transmembrane protein kinase, putative              |
| 617 | 259760_at   | 177   | 1.1 | 0.9 | 1.2 | 194   | 0.8 | 0.6 | 0.4 | AT1G77580 | expressed protein                                                       |
| 618 | 245592_at   | 409   | 1.0 | 1.0 | 1.3 | 713   | 1.0 | 0.9 | 0.4 | AT4G14540 | CCAAT-binding transcription factor subunit A(CBF-A)                     |
| 619 | 250952_at   | 175   | 0.8 | 0.9 | 1.0 | 261   | 0.9 | 0.6 | 0.4 | AT5G03570 | hypothetical protein                                                    |
| 620 | 254232_at   | 1358  | 0.7 | 0.6 | 0.5 | 2676  | 1.1 | 1.1 | 0.4 | AT4G23600 | aminotransferase family                                                 |
| 621 | 251714_at   | 737   | 0.9 | 0.6 | 0.4 | 862   | 1.3 | 0.9 | 0.4 | AT3G56370 | leucine-rich repeat transmembrane protein kinase, putative              |
| 622 | 256096_at   | 274   | 1.2 | 0.9 | 0.9 | 307   | 1.1 | 0.9 | 0.4 | AT1G13650 | expressed protein                                                       |
| 623 | 266636_at   | 10245 | 1.0 | 1.0 | 1.0 | 13673 | 1.0 | 0.7 | 0.4 | AT2G35370 | glycine decarboxylase complex H-protein                                 |
| 624 | 264597_at   | 392   | 0.9 | 0.7 | 0.7 | 846   | 1.0 | 0.8 | 0.4 | AT1G04620 | expressed protein                                                       |
| 625 | 265339_at   | 738   | 0.8 | 0.8 | 0.8 | 2885  | 1.2 | 1.1 | 0.4 | AT2G18230 | inorganic pyrophosphatase -related                                      |
| 626 | 258040_at   | 674   | 0.8 | 0.7 | 0.6 | 1060  | 1.0 | 0.8 | 0.4 | AT3G21190 | expressed protein                                                       |
| 627 | 253515_at   | 275   | 1.0 | 0.6 | 0.4 | 250   | 0.7 | 0.8 | 0.4 | AT4G31320 | auxin-induced (indole-3-acetic acid induced) protein, putative (SAUR_c) |
| 628 | 252635_at   | 93    | 0.8 | 0.7 | 0.5 | 130   | 1.0 | 0.5 | 0.4 | AT3G44510 | expressed protein                                                       |
| 629 | 255962_at   | 171   | 0.8 | 0.6 | 0.7 | 143   | 0.7 | 0.5 | 0.4 | AT1G22335 | glycine-rich RNA-binding protein -related                               |
| 630 | 260343_at   | 819   | 1.1 | 0.9 | 1.0 | 1240  | 1.1 | 0.9 | 0.4 | AT1G69200 | pfkB type carbohydrate kinase protein family                            |
| 631 | 261308_at   | 778   | 0.8 | 0.5 | 0.4 | 738   | 1.0 | 0.6 | 0.4 | AT1G48480 | leucine-rich repeat transmembrane protein kinase, putative              |
| 632 | 252916_at   | 147   | 1.0 | 0.8 | 0.9 | 318   | 1.1 | 0.7 | 0.4 | AT4G38950 | kinesin like protein                                                    |
| 633 | 259775_at   | 514   | 0.9 | 0.9 | 1.0 | 727   | 1.1 | 0.7 | 0.4 | AT1G29530 | expressed protein                                                       |
| 634 | 256892_at   | 794   | 1.0 | 0.8 | 1.0 | 1114  | 1.0 | 0.8 | 0.4 | AT3G19000 | oxidoreductase, 2OG-Fe(II) oxygenase family                             |
| 635 | 260982_at   | 782   | 0.9 | 0.9 | 1.1 | 863   | 0.9 | 0.6 | 0.4 | AT1G53520 | chalcone-flavanone isomerase-related                                    |
| 636 | 248764_at   | 431   | 1.0 | 1.2 | 1.2 | 1722  | 1.2 | 0.8 | 0.4 | AT5G47640 | expressed protein                                                       |
| 637 | 246339_at   | 1248  | 1.2 | 1.0 | 1.1 | 1764  | 1.0 | 0.7 | 0.4 | AT3G44890 | 50S ribosomal protein L9, chloroplast precursor (CL9)                   |
| 638 | 253483_at   | 324   | 0.6 | 0.5 | 0.7 | 472   | 1.1 | 0.8 | 0.4 | AT4G31910 | acyltransferase family                                                  |
| 639 | 253581_at   | 1978  | 0.8 | 0.8 | 0.8 | 3221  | 1.0 | 0.6 | 0.4 | AT4G30660 | stress responsive protein homolog                                       |
| 640 | 248093_at   | 747   | 1.0 | 0.8 | 0.8 | 780   | 1.0 | 0.8 | 0.4 | AT5G55210 | expressed protein                                                       |
| 641 | 246880_s_at | 6087  | 0.8 | 0.9 | 0.9 | 7300  | 1.0 | 0.8 | 0.4 | AT5G25980 | glycosyl hydrolase family 1                                             |
| 642 | 248094_at   | 988   | 1.0 | 0.9 | 1.0 | 1492  | 1.0 | 0.6 | 0.4 | AT5G55220 | trigger factor-related protein                                          |
| 643 | 251289_at   | 168   | 0.9 | 1.2 | 1.1 | 213   | 0.9 | 0.9 | 0.4 | AT3G61830 | auxin response factor-related protein                                   |
| 644 | 255433_at   | 1536  | 0.7 | 0.6 | 0.6 | 1695  | 0.9 | 0.8 | 0.4 | AT4G03210 | xyloglucan endotransglycosylase, putative                               |
| 645 | 257062_at   | 1376  | 0.8 | 0.8 | 0.8 | 2944  | 1.4 | 0.6 | 0.4 | AT3G18290 | zinc finger protein -related                                            |
| 646 | 262231_at   | 201   | 0.9 | 1.0 | 0.9 | 289   | 1.0 | 1.0 | 0.4 | AT1G68740 | receptor protein -related                                               |

|     |             |       |     |     |     |       |     |     |     |           |                                                              |
|-----|-------------|-------|-----|-----|-----|-------|-----|-----|-----|-----------|--------------------------------------------------------------|
| 647 | 247678_at   | 1305  | 0.9 | 0.9 | 0.6 | 1911  | 1.0 | 0.5 | 0.4 | AT5G59520 | zinc transporter (ZIP2)                                      |
| 648 | 250739_at   | 1484  | 0.9 | 0.8 | 1.0 | 1838  | 1.1 | 0.7 | 0.4 | AT5G05740 | expressed protein                                            |
| 649 | 251461_at   | 1684  | 0.7 | 1.0 | 0.9 | 2006  | 1.1 | 0.6 | 0.4 | AT3G59780 | expressed protein                                            |
| 650 | 247400_at   | 1073  | 1.0 | 0.9 | 1.0 | 1241  | 1.0 | 0.8 | 0.4 | AT5G62840 | expressed protein                                            |
| 651 | 253697_at   | 149   | 0.7 | 0.8 | 0.7 | 249   | 1.1 | 0.7 | 0.4 | AT4G29700 | nucleotide pyrophosphatase -related protein                  |
| 652 | 256455_at   | 182   | 0.8 | 0.8 | 1.2 | 182   | 0.8 | 0.6 | 0.4 | AT1G75190 | expressed protein                                            |
| 653 | 262232_at   | 72    | 0.6 | 1.1 | 1.1 | 171   | 0.9 | 0.5 | 0.4 | AT1G68600 | expressed protein                                            |
| 654 | 250860_at   | 242   | 0.9 | 0.7 | 0.6 | 222   | 0.9 | 0.7 | 0.4 | AT5G04770 | amino acid transport - like protein                          |
| 655 | 252603_at   | 1049  | 0.9 | 0.9 | 1.0 | 1510  | 1.0 | 0.7 | 0.4 | AT3G45050 | expressed protein                                            |
| 656 | 258618_at   | 121   | 1.0 | 0.8 | 0.9 | 205   | 0.9 | 0.6 | 0.4 | AT3G02885 | expressed protein                                            |
| 657 | 247881_at   | 765   | 0.8 | 0.7 | 0.7 | 807   | 0.9 | 0.7 | 0.4 | AT5G57700 | expressed protein                                            |
| 658 | 255298_at   | 3997  | 1.1 | 0.8 | 0.2 | 1950  | 1.3 | 0.8 | 0.4 | AT4G04840 | expressed protein                                            |
| 659 | 249037_at   | 4509  | 1.0 | 0.9 | 0.7 | 3978  | 0.9 | 0.8 | 0.4 | AT5G44130 | fasciclin-like arabinogalactan-protein, putative (FLA13)     |
| 660 | 249876_at   | 3781  | 0.9 | 1.1 | 1.1 | 4482  | 1.0 | 0.8 | 0.4 | AT5G23060 | expressed protein                                            |
| 661 | 261203_at   | 1074  | 0.7 | 0.6 | 0.5 | 1131  | 0.9 | 0.7 | 0.4 | AT1G12845 | expressed protein                                            |
| 662 | 246036_at   | 325   | 1.1 | 1.1 | 1.1 | 708   | 1.0 | 0.8 | 0.4 | AT5G08370 | glycosyl hydrolase family 27 (alpha-galactosidase/melibiose) |
| 663 | 265766_at   | 105   | 1.1 | 1.0 | 0.8 | 192   | 0.9 | 0.7 | 0.4 | AT2G48080 | oxidoreductase, 2OG-Fe(II) oxygenase family                  |
| 664 | 245130_at   | 894   | 0.7 | 0.6 | 0.6 | 541   | 1.0 | 0.7 | 0.4 | AT2G45340 | leucine-rich repeat transmembrane protein kinase, putative   |
| 665 | 261913_at   | 275   | 1.0 | 0.7 | 0.6 | 361   | 1.0 | 0.8 | 0.4 | AT1G65860 | flavin-containing monooxygenase (FMO) family                 |
| 666 | 247385_at   | 376   | 1.2 | 0.7 | 0.4 | 641   | 1.0 | 1.1 | 0.4 | AT5G63420 | hydrolase family                                             |
| 667 | 249993_at   | 555   | 1.0 | 0.9 | 1.1 | 794   | 1.0 | 0.9 | 0.4 | AT5G18570 | GTP-binding protein obg -related                             |
| 668 | 253758_at   | 4095  | 0.9 | 0.9 | 1.1 | 5410  | 1.0 | 0.7 | 0.4 | AT4G29060 | expressed protein                                            |
| 669 | 259009_at   | 12684 | 1.0 | 0.8 | 0.7 | 16580 | 0.9 | 0.7 | 0.4 | AT3G09260 | glycosyl hydrolase family 1                                  |
| 670 | 254185_at   | 245   | 0.9 | 0.6 | 0.6 | 394   | 1.0 | 0.7 | 0.4 | AT4G23990 | cellulose synthase - related                                 |
| 671 | 252001_at   | 1184  | 0.9 | 0.9 | 0.9 | 1692  | 1.0 | 0.7 | 0.4 | AT3G52750 | plastid division protein FtsZ, putative                      |
| 672 | 250892_at   | 1093  | 0.7 | 0.6 | 0.4 | 884   | 1.1 | 0.9 | 0.4 | AT5G03760 | glycosyltransferase family 2                                 |
| 673 | 265894_at   | 159   | 1.3 | 1.1 | 0.6 | 153   | 0.8 | 0.7 | 0.4 | AT2G15050 | lipid transfer protein, putative                             |
| 674 | 250884_at   | 1711  | 1.1 | 1.0 | 1.2 | 1921  | 1.0 | 0.8 | 0.4 | AT5G03940 | signal recognition particle 54CP protein precursor           |
| 675 | 257880_at   | 1160  | 0.9 | 1.1 | 1.2 | 2305  | 1.0 | 0.8 | 0.4 | AT3G16910 | AMP-dependent synthetase and ligase family                   |
| 676 | 258895_at   | 245   | 1.0 | 0.7 | 0.8 | 220   | 0.8 | 0.6 | 0.4 | AT3G05600 | epoxide hydrolase, putative                                  |
| 677 | 259344_at   | 591   | 1.0 | 0.8 | 1.0 | 774   | 1.0 | 0.8 | 0.4 | AT3G03710 | polyribonucleotide nucleotidyltransferase, putative          |
| 678 | 260297_at   | 233   | 0.8 | 0.8 | 1.2 | 327   | 1.0 | 0.5 | 0.4 | AT1G80280 | hydrolase, alpha/beta fold family                            |
| 679 | 266330_at   | 3165  | 0.9 | 1.1 | 1.1 | 2842  | 1.1 | 0.5 | 0.4 | AT2G01530 | major latex protein (MLP)-related                            |
| 680 | 246654_s_at | 1690  | 0.9 | 0.9 | 0.9 | 2208  | 1.0 | 0.8 | 0.4 | AT5G35210 | PHD finger transcription factor, putative                    |
| 681 | 253148_at   | 101   | 1.0 | 0.7 | 0.7 | 122   | 0.9 | 0.4 | 0.4 | AT4G35620 | cyclin 2b (cyc2b)                                            |
| 682 | 249410_at   | 512   | 0.8 | 0.5 | 0.4 | 388   | 0.9 | 0.6 | 0.4 | AT5G40380 | receptor-related protein kinase                              |
| 683 | 247304_at   | 792   | 1.0 | 0.7 | 1.1 | 839   | 0.7 | 0.3 | 0.4 | AT5G63850 | amino acid transporter 4 (AAP4)                              |

|     |             |      |     |     |     |       |     |     |     |           |                                                                                              |
|-----|-------------|------|-----|-----|-----|-------|-----|-----|-----|-----------|----------------------------------------------------------------------------------------------|
| 684 | 265076_at   | 6471 | 1.0 | 0.9 | 1.1 | 10831 | 1.0 | 0.7 | 0.4 | AT1G55490 | RuBisCo subunit binding-protein beta subunit/60 kDa chaperonin beta subunit                  |
| 685 | 264978_at   | 261  | 1.4 | 1.0 | 0.7 | 238   | 1.0 | 0.6 | 0.4 | AT1G27120 | galactosyltransferase family                                                                 |
| 686 | 262081_at   | 71   | 1.4 | 0.9 | 1.3 | 100   | 0.9 | 0.5 | 0.4 | AT1G59540 | kinesin-related protein                                                                      |
| 687 | 254931_at   | 438  | 1.0 | 1.0 | 1.2 | 633   | 0.7 | 0.6 | 0.4 | AT4G11460 | serine/threonine kinase-related protein                                                      |
| 688 | 253078_at   | 448  | 0.8 | 0.6 | 0.6 | 564   | 0.9 | 0.6 | 0.4 | AT4G36180 | leucine rich repeat protein family                                                           |
| 689 | 253495_at   | 953  | 0.9 | 0.9 | 1.0 | 965   | 1.0 | 0.8 | 0.4 | AT4G31850 | pentatricopeptide (PPR) repeat-containing protein                                            |
| 690 | 244977_at   | 356  | 0.9 | 0.8 | 0.9 | 689   | 0.7 | 0.6 | 0.4 | ATCG00730 | cytochrome b6 (PETD)                                                                         |
| 691 | 246776_at   | 167  | 1.4 | 1.1 | 0.7 | 178   | 0.9 | 0.6 | 0.4 | AT5G27550 | kinesin-related protein                                                                      |
| 692 | 259528_at   | 213  | 0.6 | 0.3 | 0.4 | 250   | 1.1 | 1.0 | 0.4 | AT1G12330 | expressed protein                                                                            |
| 693 | 256736_at   | 509  | 0.8 | 0.9 | 0.8 | 516   | 1.5 | 0.8 | 0.4 | AT3G29410 | terpene synthase/cyclase family                                                              |
| 694 | 263098_at   | 171  | 1.6 | 1.2 | 1.3 | 193   | 1.1 | 0.5 | 0.4 | AT2G16005 | expressed protein                                                                            |
| 695 | 254606_at   | 643  | 0.8 | 0.7 | 0.8 | 954   | 0.9 | 0.7 | 0.4 | AT4G19030 | major intrinsic protein (MIP) family                                                         |
| 696 | 251172_at   | 2849 | 0.9 | 0.8 | 0.9 | 3190  | 0.9 | 0.7 | 0.4 | AT3G63190 | expressed protein                                                                            |
| 697 | 265169_x_at | 1622 | 0.8 | 0.7 | 0.5 | 1611  | 1.0 | 0.6 | 0.4 | AT1G23720 | proline-rich protein family                                                                  |
| 698 | 252199_at   | 549  | 1.0 | 1.0 | 1.2 | 514   | 1.1 | 0.8 | 0.4 | AT3G50270 | hydroxycinnamoyl/benzoyltransferase-related                                                  |
| 699 | 254105_at   | 3940 | 1.0 | 1.0 | 1.2 | 4379  | 1.0 | 0.7 | 0.4 | AT4G25080 | magnesium-protoporphyrin O-methyltransferase (magnesium-protoporphyrin IX methyltransferase) |
| 700 | 252032_at   | 5835 | 1.0 | 0.9 | 1.0 | 5869  | 1.0 | 0.7 | 0.4 | AT3G52150 | RNA recognition motif (RRM) - containing protein                                             |
| 701 | 248119_at   | 130  | 1.0 | 0.8 | 0.7 | 164   | 0.7 | 0.8 | 0.4 | AT5G54590 | protein kinase family                                                                        |
| 702 | 258857_at   | 964  | 0.9 | 0.8 | 1.0 | 1025  | 1.0 | 0.6 | 0.4 | AT3G02110 | serine carboxypeptidase -related                                                             |
| 703 | 263979_at   | 2932 | 1.1 | 0.8 | 0.8 | 2641  | 1.0 | 0.7 | 0.4 | AT2G42840 | protodermal factor 1                                                                         |
| 704 | 263705_at   | 1352 | 0.9 | 1.0 | 1.1 | 1795  | 1.0 | 0.8 | 0.4 | AT1G31190 | expressed protein                                                                            |
| 705 | 252148_at   | 143  | 1.2 | 1.0 | 0.6 | 157   | 0.9 | 0.5 | 0.4 | AT3G51280 | male sterility MS5, putative                                                                 |
| 706 | 253855_at   | 712  | 0.8 | 0.9 | 1.0 | 912   | 1.0 | 0.7 | 0.4 | AT4G28050 | senescence-associated protein, putative                                                      |
| 707 | 257856_at   | 1805 | 0.9 | 0.8 | 0.9 | 1804  | 1.0 | 0.8 | 0.4 | AT3G12930 | expressed protein                                                                            |
| 708 | 250376_at   | 110  | 0.7 | 0.5 | 0.9 | 179   | 1.1 | 0.8 | 0.4 | AT5G11550 | expressed protein                                                                            |
| 709 | 251885_at   | 5733 | 1.0 | 0.9 | 1.1 | 7192  | 1.0 | 0.7 | 0.4 | AT3G54050 | fructose-bisphosphatase precursor                                                            |
| 710 | 245368_at   | 586  | 1.1 | 0.9 | 0.9 | 556   | 1.0 | 0.8 | 0.4 | AT4G15510 | oxygen-evolving complex 25.6 kD protein, chloroplast precursor, putative                     |
| 711 | 263664_at   | 2092 | 0.9 | 0.7 | 0.6 | 1681  | 1.2 | 0.7 | 0.4 | AT1G04250 | auxin-responsive protein IAA17 (Indoleacetic acid-induced protein 17)                        |
| 712 | 252626_at   | 159  | 1.1 | 0.8 | 0.8 | 214   | 1.1 | 0.7 | 0.4 | AT3G44940 | expressed protein                                                                            |
| 713 | 260442_at   | 816  | 0.7 | 0.7 | 1.0 | 1267  | 1.0 | 0.9 | 0.4 | AT1G68220 | expressed protein                                                                            |
| 714 | 259363_at   | 1342 | 0.8 | 0.6 | 0.8 | 2499  | 1.1 | 0.8 | 0.4 | AT1G13270 | methionine aminopeptidase I (MAP1) -related                                                  |
| 715 | 245174_at   | 202  | 1.0 | 0.8 | 0.7 | 198   | 0.9 | 0.5 | 0.4 | AT2G47500 | kinesin-related protein                                                                      |
| 716 | 265957_at   | 182  | 1.0 | 0.6 | 0.6 | 244   | 1.6 | 0.8 | 0.4 | AT2G37300 | expressed protein                                                                            |
| 717 | 249524_at   | 2143 | 1.0 | 1.0 | 1.1 | 1876  | 0.9 | 0.7 | 0.4 | AT5G38520 | hydrolase, alpha/beta fold family                                                            |

|            |           |      |     |     |     |       |     |     |     |           |                                                                                        |
|------------|-----------|------|-----|-----|-----|-------|-----|-----|-----|-----------|----------------------------------------------------------------------------------------|
| <b>718</b> | 258322_at | 42   | 1.2 | 2.1 | 0.9 | 124   | 0.5 | 0.4 | 0.4 | AT3G22740 | selenocysteine methyltransferase -related                                              |
| <b>719</b> | 252215_at | 275  | 0.8 | 0.7 | 1.0 | 321   | 1.2 | 0.8 | 0.4 | AT3G50240 | kinesin-related protein                                                                |
| <b>720</b> | 253743_at | 216  | 1.2 | 1.2 | 1.1 | 512   | 1.1 | 0.7 | 0.4 | AT4G28940 | expressed protein                                                                      |
| <b>721</b> | 255028_at | 192  | 0.6 | 0.4 | 0.4 | 325   | 1.2 | 0.9 | 0.4 | AT4G09890 | expressed protein                                                                      |
| <b>722</b> | 256237_at | 2575 | 0.8 | 0.7 | 0.7 | 2196  | 1.0 | 0.7 | 0.4 | AT3G12610 | DNA-damage-repair/toleration protein, putative (DRT100)                                |
| <b>723</b> | 256489_at | 321  | 0.8 | 0.8 | 0.9 | 556   | 1.0 | 1.0 | 0.4 | AT1G31550 | lipase, putative                                                                       |
| <b>724</b> | 258470_at | 687  | 1.0 | 0.9 | 0.8 | 1608  | 0.9 | 0.8 | 0.4 | AT3G06035 | expressed protein                                                                      |
| <b>725</b> | 265443_at | 127  | 0.7 | 0.6 | 0.5 | 247   | 1.0 | 0.6 | 0.4 | AT2G20750 | beta-expansin, putative (EXPB1)                                                        |
| <b>726</b> | 254623_at | 6723 | 1.0 | 0.9 | 1.0 | 7146  | 1.0 | 0.7 | 0.4 | AT4G18480 | magnesium-chelatase, subunit chlI, chloroplast (Mg-protoporphyrin IX chelatase) (CHLI) |
| <b>727</b> | 261975_at | 664  | 0.9 | 0.4 | 0.3 | 513   | 0.8 | 0.6 | 0.4 | AT1G64640 | plastocyanin-like domain containing protein                                            |
| <b>728</b> | 246601_at | 760  | 0.9 | 0.7 | 0.9 | 591   | 0.9 | 0.7 | 0.4 | AT1G31710 | copper amine oxidase -related                                                          |
| <b>729</b> | 254649_at | 353  | 0.8 | 0.6 | 0.6 | 470   | 1.0 | 0.7 | 0.4 | AT4G18570 | proline-rich protein family                                                            |
| <b>730</b> | 256926_at | 88   | 1.0 | 0.8 | 1.0 | 169   | 1.0 | 0.6 | 0.4 | AT3G22540 | hypothetical protein                                                                   |
| <b>731</b> | 254386_at | 9229 | 0.9 | 0.7 | 0.7 | 14457 | 1.0 | 0.7 | 0.4 | AT4G21960 | peroxidase, putative                                                                   |
| <b>732</b> | 249826_at | 952  | 0.9 | 0.8 | 0.8 | 1409  | 0.9 | 0.9 | 0.4 | AT5G23310 | iron superoxide dismutase (FSD3)                                                       |
| <b>733</b> | 263115_at | 246  | 1.2 | 1.2 | 1.2 | 240   | 1.2 | 0.7 | 0.4 | AT1G03055 | expressed protein                                                                      |
| <b>734</b> | 256855_at | 8627 | 1.2 | 1.0 | 1.0 | 10724 | 0.9 | 0.7 | 0.4 | AT3G15190 | chloroplast 30S ribosomal protein S20, putative                                        |
| <b>735</b> | 251605_at | 170  | 4.2 | 3.6 | 1.5 | 159   | 1.2 | 0.8 | 0.4 | AT3G57830 | leucine-rich repeat transmembrane protein kinase, putative                             |
| <b>736</b> | 263142_at | 2437 | 0.8 | 1.0 | 1.2 | 2288  | 1.1 | 0.7 | 0.4 | AT1G65230 | expressed protein                                                                      |
| <b>737</b> | 260857_at | 624  | 1.0 | 0.9 | 0.8 | 929   | 0.8 | 0.7 | 0.4 | AT1G21880 | expressed protein                                                                      |
| <b>738</b> | 247962_at | 139  | 1.1 | 1.0 | 1.6 | 184   | 0.7 | 0.4 | 0.4 | AT5G56580 | mitogen-activated protein kinase kinase (MAPKK), putative (MKK6)                       |
| <b>739</b> | 246509_at | 984  | 1.0 | 0.9 | 0.8 | 1252  | 1.1 | 0.9 | 0.4 | AT5G16715 | valine--tRNA ligase-related protein                                                    |
| <b>740</b> | 248085_at | 651  | 0.9 | 0.7 | 0.5 | 904   | 0.9 | 0.7 | 0.4 | AT5G55480 | expressed protein                                                                      |
| <b>741</b> | 257294_at | 714  | 0.5 | 0.5 | 1.0 | 700   | 1.1 | 0.9 | 0.4 | AT3G15570 | non-phototropic hypocotyl protein -related                                             |
| <b>742</b> | 258607_at | 5562 | 1.0 | 1.0 | 1.2 | 5991  | 1.0 | 0.8 | 0.4 | AT3G02730 | thioredoxin, putative                                                                  |
| <b>743</b> | 245215_at | 1012 | 0.9 | 0.8 | 1.3 | 1229  | 1.0 | 0.9 | 0.4 | AT1G67830 | GDSL-motif lipase/hydrolase protein                                                    |
| <b>744</b> | 263477_at | 1184 | 1.1 | 0.9 | 0.8 | 1693  | 1.1 | 0.9 | 0.4 | AT2G31790 | UDP-glycosyltransferase family                                                         |
| <b>745</b> | 259133_at | 601  | 0.8 | 0.8 | 0.7 | 724   | 1.0 | 1.0 | 0.4 | AT3G05400 | sugar transporter, putative                                                            |
| <b>746</b> | 260704_at | 8271 | 1.0 | 1.0 | 1.0 | 10110 | 0.9 | 0.7 | 0.4 | AT1G32470 | glycine cleavage system H protein precursor -related                                   |
| <b>747</b> | 262134_at | 177  | 0.7 | 0.7 | 0.8 | 318   | 0.9 | 0.8 | 0.4 | AT1G77990 | sulfate transporter -related                                                           |
| <b>748</b> | 262235_at | 8817 | 1.0 | 1.0 | 1.1 | 9969  | 0.9 | 0.7 | 0.4 | AT1G48350 | ribosomal protein L18p family                                                          |
| <b>749</b> | 245318_at | 8683 | 1.1 | 1.1 | 0.9 | 8575  | 0.9 | 0.6 | 0.4 | AT4G16980 | arabinogalactan-protein family                                                         |
| <b>750</b> | 266673_at | 7386 | 0.8 | 0.7 | 0.9 | 10679 | 1.1 | 0.8 | 0.4 | AT2G29630 | thiamin biosynthesis protein -related                                                  |
| <b>751</b> | 254372_at | 3401 | 0.9 | 0.7 | 0.5 | 4519  | 1.0 | 0.7 | 0.4 | AT4G21620 | glycine-rich protein                                                                   |
| <b>752</b> | 252023_at | 519  | 0.9 | 0.7 | 0.8 | 583   | 1.0 | 0.8 | 0.4 | AT3G52920 | expressed protein                                                                      |
| <b>753</b> | 258676_at | 779  | 1.0 | 0.8 | 0.6 | 621   | 0.9 | 0.6 | 0.4 | AT3G08600 | expressed protein                                                                      |

|            |             |      |     |     |     |      |     |     |     |           |                                                                          |
|------------|-------------|------|-----|-----|-----|------|-----|-----|-----|-----------|--------------------------------------------------------------------------|
| <b>754</b> | 253411_at   | 566  | 0.7 | 1.0 | 1.1 | 890  | 1.0 | 0.8 | 0.4 | AT4G32980 | homeobox protein (ATH1)                                                  |
| <b>755</b> | 245296_at   | 1498 | 0.7 | 0.6 | 0.7 | 3061 | 1.2 | 0.7 | 0.4 | AT4G16370 | isp4 like protein                                                        |
| <b>756</b> | 252411_at   | 966  | 1.1 | 1.2 | 1.1 | 1078 | 1.2 | 1.1 | 0.4 | AT3G47430 | expressed protein                                                        |
| <b>757</b> | 264987_at   | 905  | 0.8 | 0.6 | 0.6 | 1015 | 1.1 | 0.8 | 0.4 | AT1G27030 | expressed protein                                                        |
| <b>758</b> | 259398_at   | 181  | 0.9 | 0.7 | 0.5 | 108  | 1.0 | 0.7 | 0.4 | AT1G17700 | expressed protein                                                        |
| <b>759</b> | 267505_at   | 911  | 1.0 | 0.8 | 0.7 | 564  | 1.0 | 0.9 | 0.4 | AT2G45560 | cytochrome P450 family                                                   |
| <b>760</b> | 247477_at   | 245  | 1.2 | 1.0 | 1.3 | 280  | 0.9 | 0.6 | 0.4 | AT5G62340 | expressed protein                                                        |
| <b>761</b> | 253667_at   | 2034 | 0.9 | 0.9 | 0.7 | 2098 | 1.0 | 0.7 | 0.4 | AT4G30170 | peroxidase, putative                                                     |
| <b>762</b> | 244972_at   | 1524 | 0.8 | 0.9 | 0.8 | 1967 | 0.8 | 0.7 | 0.4 | ATCG00680 | photosystem II 47 kDa protein (PSBB)                                     |
| <b>763</b> | 245354_at   | 2316 | 0.9 | 0.9 | 1.1 | 2563 | 1.0 | 0.9 | 0.4 | AT4G17600 | Lil3 protein                                                             |
| <b>764</b> | 255818_at   | 441  | 0.9 | 0.8 | 0.7 | 440  | 0.9 | 0.8 | 0.4 | AT2G33570 | expressed protein                                                        |
| <b>765</b> | 249191_at   | 706  | 3.4 | 3.6 | 2.1 | 962  | 1.0 | 0.7 | 0.4 | AT5G42760 | expressed protein                                                        |
| <b>766</b> | 256066_at   | 200  | 1.9 | 1.6 | 1.0 | 198  | 0.7 | 0.8 | 0.4 | AT1G06980 | expressed protein                                                        |
| <b>767</b> | 257938_at   | 4756 | 1.0 | 0.8 | 0.8 | 5024 | 0.9 | 0.7 | 0.4 | AT3G19820 | cell elongation protein (DWARF1) (DIMINUTO) (DIM)                        |
| <b>768</b> | 253233_at   | 1423 | 1.1 | 0.8 | 0.8 | 1738 | 0.9 | 0.9 | 0.4 | AT4G34290 | expressed protein                                                        |
| <b>769</b> | 255719_at   | 5389 | 1.0 | 1.0 | 1.2 | 7273 | 1.0 | 0.6 | 0.4 | AT1G32080 | expressed protein                                                        |
| <b>770</b> | 259132_at   | 437  | 0.9 | 0.7 | 0.8 | 524  | 1.0 | 0.8 | 0.4 | AT3G02250 | auxin-independent growth promoter -related                               |
| <b>771</b> | 260441_at   | 449  | 0.9 | 0.8 | 0.9 | 434  | 1.0 | 0.8 | 0.4 | AT1G68260 | thioesterase-related                                                     |
| <b>772</b> | 261562_at   | 360  | 0.9 | 1.0 | 0.5 | 335  | 1.1 | 0.8 | 0.4 | AT1G01750 | actin depolymerizing factor -related                                     |
| <b>773</b> | 252529_at   | 244  | 0.8 | 0.7 | 0.7 | 193  | 1.0 | 0.7 | 0.4 | AT3G46490 | oxidoreductase, 2OG-Fe(II) oxygenase family                              |
| <b>774</b> | 245965_at   | 462  | 0.7 | 0.5 | 0.5 | 426  | 1.2 | 0.8 | 0.4 | AT5G19730 | pectinesterase family                                                    |
| <b>775</b> | 260739_at   | 365  | 0.9 | 0.6 | 0.6 | 601  | 0.9 | 0.9 | 0.4 | AT1G15000 | serine carboxypeptidase -related                                         |
| <b>776</b> | 254361_at   | 1058 | 0.9 | 1.0 | 1.0 | 1298 | 0.8 | 0.5 | 0.4 | AT4G22212 | expressed protein                                                        |
| <b>777</b> | 263706_s_at | 1177 | 0.9 | 0.8 | 1.0 | 2340 | 1.0 | 0.8 | 0.4 | AT1G31180 | 3-isopropylmalate dehydrogenase, chloroplast, putative                   |
| <b>778</b> | 250960_at   | 1290 | 0.9 | 0.6 | 0.5 | 755  | 1.1 | 0.8 | 0.4 | AT5G02940 | expressed protein                                                        |
| <b>779</b> | 254363_at   | 964  | 1.1 | 0.8 | 0.9 | 986  | 0.9 | 0.6 | 0.4 | AT4G22010 | pectinesterase (pectin methylesterase), putative                         |
| <b>780</b> | 263431_at   | 4435 | 1.1 | 0.9 | 0.8 | 5327 | 1.0 | 0.7 | 0.4 | AT2G22170 | expressed protein                                                        |
| <b>781</b> | 251513_at   | 478  | 1.3 | 0.9 | 0.6 | 327  | 0.9 | 0.6 | 0.4 | AT3G59220 | pirin-like protein                                                       |
| <b>782</b> | 256299_at   | 4106 | 0.7 | 0.6 | 0.5 | 2161 | 0.9 | 0.6 | 0.4 | AT1G69530 | expansin, putative (EXP1)                                                |
| <b>783</b> | 248046_at   | 1067 | 0.9 | 0.6 | 0.4 | 1086 | 0.9 | 0.9 | 0.4 | AT5G56040 | leucine rich repeat protein kinase, putative                             |
| <b>784</b> | 251796_at   | 3778 | 0.9 | 0.7 | 0.4 | 3125 | 0.9 | 0.7 | 0.4 | AT3G55360 | 3-oxo-5-alpha-steroid 4-dehydrogenase (steroid 5-alpha-reductase) family |
| <b>785</b> | 264470_at   | 79   | 0.9 | 0.8 | 0.9 | 170  | 0.8 | 0.6 | 0.4 | AT1G67110 | cytochrome P450, putative                                                |
| <b>786</b> | 254474_at   | 548  | 1.2 | 0.9 | 0.6 | 1288 | 1.1 | 0.7 | 0.4 | AT4G20390 | expressed integral membrane protein common family                        |
| <b>787</b> | 245150_at   | 1940 | 1.0 | 0.8 | 1.0 | 2590 | 1.0 | 0.8 | 0.4 | AT2G47590 | photolyase/blue-light receptor (PHR2)                                    |
| <b>788</b> | 261190_at   | 4650 | 1.0 | 0.9 | 1.0 | 5616 | 1.0 | 0.7 | 0.4 | AT1G32990 | ribosomal protein L11p family                                            |
| <b>789</b> | 263656_at   | 162  | 0.9 | 1.1 | 1.9 | 186  | 1.4 | 0.9 | 0.4 | AT1G04240 | auxin-responsive protein IAA3 (Indoleacetic acid-induced protein 3)      |

|            |             |       |     |     |     |       |     |     |     |           |                                                      |
|------------|-------------|-------|-----|-----|-----|-------|-----|-----|-----|-----------|------------------------------------------------------|
| <b>790</b> | 262871_at   | 345   | 0.8 | 0.7 | 0.9 | 535   | 1.0 | 0.7 | 0.4 | AT1G65010 | expressed protein                                    |
| <b>791</b> | 247696_at   | 682   | 0.7 | 0.4 | 0.5 | 440   | 0.9 | 0.7 | 0.4 | AT5G59780 | myb family transcription factor                      |
| <b>792</b> | 264845_at   | 6723  | 1.0 | 0.9 | 1.0 | 8016  | 1.0 | 0.8 | 0.4 | AT1G03680 | thioredoxin M-type 1, chloroplast precursor (TRX-M1) |
| <b>793</b> | 253165_at   | 362   | 0.8 | 0.6 | 0.5 | 268   | 1.1 | 1.0 | 0.4 | AT4G35320 | expressed protein                                    |
| <b>794</b> | 250565_at   | 388   | 0.9 | 0.8 | 0.9 | 632   | 0.9 | 0.8 | 0.4 | AT5G08000 | glycosyl hydrolase family 17                         |
| <b>795</b> | 248961_at   | 626   | 0.7 | 0.7 | 1.0 | 875   | 1.0 | 0.8 | 0.4 | AT5G45650 | subtilisin-related protease                          |
| <b>796</b> | 249929_at   | 891   | 1.0 | 1.0 | 1.0 | 1155  | 0.9 | 0.8 | 0.4 | AT5G22340 | expressed protein                                    |
| <b>797</b> | 252975_s_at | 1174  | 1.3 | 1.2 | 1.2 | 1404  | 1.1 | 0.8 | 0.4 | AT4G38430 | expressed protein                                    |
| <b>798</b> | 256275_at   | 374   | 1.0 | 0.8 | 0.6 | 389   | 1.1 | 0.7 | 0.4 | AT3G12110 | actin 11 (ACT11)                                     |
| <b>799</b> | 265393_at   | 541   | 1.1 | 1.1 | 1.2 | 1132  | 1.0 | 0.5 | 0.4 | AT2G20830 | expressed protein                                    |
| <b>800</b> | 264394_at   | 10269 | 1.0 | 0.9 | 1.1 | 13611 | 0.9 | 0.7 | 0.4 | AT1G11860 | aminomethyltransferase-related precursor protein     |
| <b>801</b> | 251133_at   | 405   | 0.9 | 0.9 | 0.8 | 623   | 0.9 | 0.8 | 0.4 | AT5G01240 | amino acid permease, putative                        |
| <b>802</b> | 249383_at   | 380   | 0.7 | 0.4 | 0.3 | 130   | 1.1 | 0.4 | 0.4 | AT5G39860 | bHLH protein                                         |
| <b>803</b> | 255438_at   | 679   | 0.8 | 0.7 | 0.4 | 706   | 1.1 | 0.7 | 0.4 | AT4G03070 | 2-oxoglutarate-dependent dioxygenase (AOP1.2)        |
| <b>804</b> | 253856_at   | 527   | 0.9 | 0.8 | 0.7 | 775   | 1.0 | 0.7 | 0.4 | AT4G28100 | expressed protein                                    |
| <b>805</b> | 251969_at   | 1422  | 1.1 | 1.1 | 1.1 | 1694  | 1.1 | 0.9 | 0.4 | AT3G53130 | cytochrome p450 family                               |
| <b>806</b> | 248646_at   | 611   | 0.6 | 0.5 | 0.5 | 553   | 1.1 | 0.7 | 0.4 | AT5G49100 | expressed protein                                    |
| <b>807</b> | 245818_at   | 230   | 0.9 | 0.8 | 0.7 | 467   | 0.9 | 0.6 | 0.4 | AT1G26100 | cytochrome b561 -related                             |
| <b>808</b> | 248443_at   | 65    | 0.9 | 1.1 | 0.8 | 114   | 1.0 | 0.6 | 0.4 | AT5G51310 | gibberellin 20-oxidase-related                       |
| <b>809</b> | 253720_at   | 362   | 1.7 | 1.0 | 1.0 | 408   | 1.2 | 0.6 | 0.4 | AT4G29270 | acid phosphatase-related protein                     |
| <b>810</b> | 244980_at   | 1642  | 0.8 | 0.8 | 0.8 | 2282  | 0.9 | 0.5 | 0.4 | ATCG00760 | ribosomal protein L36 (RPL36)                        |
| <b>811</b> | 261483_at   | 1239  | 0.9 | 0.9 | 0.8 | 1428  | 1.0 | 0.8 | 0.4 | AT1G14270 | CAAX amino terminal protease family                  |
| <b>812</b> | 246021_at   | 821   | 0.8 | 0.6 | 0.6 | 874   | 1.2 | 0.9 | 0.4 | AT5G21100 | L-ascorbate oxidase, putative                        |
| <b>813</b> | 255957_at   | 135   | 0.6 | 0.8 | 1.0 | 557   | 1.3 | 0.9 | 0.4 | AT1G22160 | senescence-associated protein -related               |
| <b>814</b> | 264078_at   | 1985  | 1.0 | 0.8 | 0.7 | 2160  | 1.0 | 0.7 | 0.4 | AT2G28470 | glycosyl hydrolase family 35 (beta-galactosidase)    |
| <b>815</b> | 254737_at   | 473   | 0.9 | 0.8 | 0.7 | 644   | 1.0 | 1.0 | 0.4 | AT4G13840 | transferase family                                   |
| <b>816</b> | 249693_at   | 303   | 0.7 | 0.7 | 0.8 | 277   | 1.0 | 0.8 | 0.4 | AT5G35750 | histidine kinase-related protein                     |
| <b>817</b> | 244996_at   | 5176  | 0.8 | 0.7 | 0.9 | 5853  | 1.0 | 0.7 | 0.4 | ATCG00160 | ribosomal protein S2 (RPS2)                          |
| <b>818</b> | 251427_at   | 698   | 0.9 | 0.8 | 0.8 | 670   | 0.9 | 0.5 | 0.4 | AT3G60130 | glycosyl hydrolase family 1                          |
| <b>819</b> | 258087_at   | 10081 | 1.0 | 1.0 | 1.0 | 13109 | 0.9 | 0.7 | 0.4 | AT3G26060 | peroxiredoxin -related                               |
| <b>820</b> | 263662_at   | 2062  | 0.8 | 0.6 | 0.7 | 2173  | 0.9 | 0.8 | 0.4 | AT1G04430 | dehydration-induced protein-related                  |
| <b>821</b> | 263677_at   | 295   | 0.8 | 0.7 | 0.8 | 366   | 0.8 | 0.6 | 0.4 | AT1G04520 | hypothetical protein                                 |
| <b>822</b> | 267590_at   | 403   | 1.2 | 1.0 | 1.0 | 1009  | 1.1 | 0.9 | 0.4 | AT2G39700 | expansin, putative (EXP4)                            |
| <b>823</b> | 251820_at   | 1032  | 1.1 | 1.2 | 1.5 | 1307  | 1.0 | 0.6 | 0.4 | AT3G55040 | ln2-1 protein, putative                              |
| <b>824</b> | 247943_at   | 922   | 0.9 | 0.9 | 1.0 | 986   | 1.0 | 0.9 | 0.4 | AT5G57170 | Macrophage migration inhibitory factor (MIF) family  |
| <b>825</b> | 247470_at   | 621   | 0.8 | 0.7 | 0.4 | 544   | 0.9 | 0.7 | 0.4 | AT5G62220 | exostosin family                                     |
| <b>826</b> | 251676_at   | 205   | 0.8 | 1.0 | 1.4 | 212   | 1.0 | 0.8 | 0.4 | AT3G57320 | expressed protein                                    |

|            |           |      |     |     |     |      |     |     |     |           |                                                                                |
|------------|-----------|------|-----|-----|-----|------|-----|-----|-----|-----------|--------------------------------------------------------------------------------|
| <b>827</b> | 250045_at | 506  | 1.0 | 0.6 | 0.5 | 640  | 1.2 | 0.8 | 0.4 | AT5G17700 | MATE efflux protein family                                                     |
| <b>828</b> | 248798_at | 4517 | 1.0 | 0.9 | 1.0 | 5406 | 0.9 | 0.7 | 0.4 | AT5G47190 | ribosomal protein L19, putative                                                |
| <b>829</b> | 259179_at | 800  | 0.8 | 0.9 | 0.9 | 1006 | 1.1 | 0.9 | 0.4 | AT3G01660 | expressed protein                                                              |
| <b>830</b> | 265155_at | 48   | 0.8 | 1.4 | 0.1 | 77   | 0.7 | 0.9 | 0.4 | AT1G30990 | major latex protein (MLP)-related                                              |
| <b>831</b> | 245016_at | 2797 | 0.6 | 0.7 | 0.6 | 2651 | 0.9 | 0.8 | 0.4 | ATCG00500 | acetyl-CoA carboxylase beta subunit (ACCD)                                     |
| <b>832</b> | 262883_at | 1070 | 1.2 | 1.1 | 0.8 | 2319 | 1.1 | 1.0 | 0.4 | AT1G64780 | ammonium transporter, putative                                                 |
| <b>833</b> | 247074_at | 488  | 0.9 | 0.8 | 0.7 | 371  | 1.0 | 0.7 | 0.4 | AT5G66590 | pathogenesis-related protein family                                            |
| <b>834</b> | 251193_at | 1256 | 1.0 | 0.9 | 1.0 | 1565 | 1.1 | 0.8 | 0.4 | AT3G62910 | peptide chain release factor, putative                                         |
| <b>835</b> | 245018_at | 2931 | 0.8 | 0.7 | 0.6 | 2961 | 1.0 | 0.7 | 0.4 | ATCG00520 | photosystem I assembly protein ycf4                                            |
| <b>836</b> | 256088_at | 675  | 1.0 | 1.0 | 1.0 | 798  | 1.0 | 0.7 | 0.4 | AT1G20810 | immunophilin / FKBP-type peptidyl-prolyl cis-trans isomerase                   |
| <b>837</b> | 254460_at | 3022 | 1.0 | 0.9 | 0.9 | 3459 | 1.0 | 0.7 | 0.4 | AT4G21210 | expressed protein                                                              |
| <b>838</b> | 264315_at | 3458 | 1.1 | 0.9 | 1.1 | 3470 | 0.9 | 0.7 | 0.4 | AT1G70370 | aromatic rich glyco protein -related                                           |
| <b>839</b> | 251143_at | 1217 | 0.8 | 0.9 | 0.6 | 1942 | 1.1 | 0.9 | 0.4 | AT5G01220 | UDP-sulfoquinovose:DAG sulfoquinovosyltransferase (sulfolipid synthase) (SQD2) |
| <b>840</b> | 266863_at | 679  | 1.1 | 1.1 | 1.0 | 888  | 1.0 | 0.7 | 0.4 | AT2G26930 | 4-diphosphocytidyl-2-C-methyl-D-erythritol kinase (CMK/CDPMEK)                 |
| <b>841</b> | 262086_at | 676  | 1.0 | 1.0 | 1.0 | 1355 | 1.0 | 0.8 | 0.4 | AT1G56050 | GTP-binding protein -related                                                   |
| <b>842</b> | 261954_at | 6136 | 1.1 | 1.0 | 1.1 | 6565 | 0.9 | 0.7 | 0.4 | AT1G64510 | plastid ribosomal protein S6 -related                                          |
| <b>843</b> | 247668_at | 589  | 0.8 | 0.7 | 0.6 | 890  | 0.9 | 0.6 | 0.4 | AT5G60100 | pseudo-response regulator, APRR3 (APRR1/TOC1 family)                           |
| <b>844</b> | 250413_at | 322  | 1.0 | 0.9 | 0.6 | 250  | 0.9 | 0.8 | 0.4 | AT5G11160 | adenine phosphoribosyltransferase - like protein                               |
| <b>845</b> | 265175_at | 387  | 0.9 | 0.8 | 0.5 | 278  | 1.1 | 0.8 | 0.4 | AT1G23480 | glycosyltransferase family 2                                                   |
| <b>846</b> | 250668_at | 3465 | 1.1 | 1.0 | 1.0 | 3720 | 1.0 | 0.8 | 0.4 | AT5G07020 | proline-rich protein family                                                    |
| <b>847</b> | 263840_at | 671  | 1.1 | 1.0 | 0.9 | 1264 | 1.3 | 1.0 | 0.4 | AT2G36885 | expressed protein                                                              |
| <b>848</b> | 252922_at | 1738 | 1.0 | 1.0 | 1.1 | 1702 | 1.0 | 0.9 | 0.4 | AT4G39040 | expressed protein                                                              |
| <b>849</b> | 246792_at | 1531 | 1.0 | 1.0 | 1.1 | 1473 | 1.0 | 0.6 | 0.4 | AT5G27290 | expressed protein                                                              |
| <b>850</b> | 249208_at | 1144 | 0.8 | 0.8 | 0.8 | 2899 | 1.1 | 0.7 | 0.4 | AT5G42650 | allene oxide synthase / cytochrome P450 74A                                    |
| <b>851</b> | 267452_at | 420  | 0.8 | 0.7 | 0.5 | 509  | 1.0 | 0.8 | 0.4 | AT2G33860 | auxin response transcription factor 3 (ETTIN/ARF3)                             |
| <b>852</b> | 253765_at | 2025 | 1.2 | 1.1 | 1.0 | 2302 | 1.1 | 0.8 | 0.4 | AT4G28740 | expressed protein                                                              |
| <b>853</b> | 253876_at | 914  | 1.0 | 0.9 | 0.7 | 839  | 1.2 | 0.8 | 0.4 | AT4G27430 | COP1-interacting protein 7 (CIP7)                                              |
| <b>854</b> | 246019_at | 963  | 1.0 | 0.9 | 1.2 | 954  | 1.0 | 0.8 | 0.4 | AT5G10690 | pentatricopeptide (PPR) repeat/CBS domain-containing protein                   |
| <b>855</b> | 256655_at | 1737 | 0.9 | 0.8 | 0.9 | 1885 | 0.9 | 0.6 | 0.4 | AT3G18890 | expressed protein                                                              |
| <b>856</b> | 264209_at | 370  | 0.9 | 0.9 | 1.0 | 295  | 1.0 | 0.7 | 0.4 | AT1G22740 | Ras-related GTP-binding protein (Rab7)                                         |
| <b>857</b> | 255193_at | 154  | 1.0 | 0.8 | 0.6 | 130  | 0.8 | 0.9 | 0.4 | AT4G07400 | F-box protein family (FBL8) (FBL24)                                            |
| <b>858</b> | 264988_at | 33   | 0.8 | 2.0 | 0.9 | 98   | 0.8 | 0.7 | 0.4 | AT1G27140 | glutathione transferase, putative                                              |
| <b>859</b> | 250256_at | 3704 | 1.1 | 1.1 | 1.0 | 5086 | 1.1 | 0.8 | 0.4 | AT5G13650 | GTP-binding protein typA (tyrosine phosphorylated protein A)                   |
| <b>860</b> | 255436_at | 1444 | 1.0 | 0.6 | 0.6 | 1395 | 1.0 | 1.0 | 0.4 | AT4G03150 | expressed protein                                                              |



|     |           |      |     |     |     |      |     |     |     |           |                                                                          |
|-----|-----------|------|-----|-----|-----|------|-----|-----|-----|-----------|--------------------------------------------------------------------------|
| 861 | 251784_at | 3320 | 0.9 | 1.0 | 1.1 | 4332 | 1.0 | 0.7 | 0.4 | AT3G55330 | oxygen-evolving complex 25.6 kD protein, chloroplast precursor, putative |
| 862 | 248449_at | 5352 | 1.0 | 0.9 | 1.0 | 5823 | 0.9 | 0.8 | 0.4 | AT5G51110 | expressed protein                                                        |
| 863 | 253860_at | 2778 | 1.0 | 0.9 | 1.0 | 2634 | 1.0 | 0.8 | 0.4 | AT4G27700 | rhodanese-like domain protein                                            |
| 864 | 265869_at | 233  | 0.9 | 0.8 | 0.9 | 355  | 1.0 | 0.8 | 0.4 | AT2G01760 | response regulator protein family                                        |
| 865 | 260806_at | 343  | 0.8 | 0.6 | 0.4 | 295  | 0.9 | 0.8 | 0.4 | AT1G78260 | RNA recognition motif (RRM) - containing protein                         |
| 866 | 247331_at | 310  | 0.8 | 0.6 | 0.5 | 666  | 1.1 | 0.9 | 0.4 | AT5G63530 | copper chaperone (CCH)-related                                           |
| 867 | 250733_at | 5119 | 1.0 | 0.9 | 1.0 | 5903 | 0.9 | 0.6 | 0.4 | AT5G06290 | 2-cys peroxiredoxin-related protein                                      |
| 868 | 261078_at | 6974 | 1.0 | 1.0 | 1.0 | 7753 | 1.0 | 0.7 | 0.4 | AT1G07320 | 50S ribosomal protein L4, chloroplast precursor (CL4)                    |
| 869 | 248178_at | 738  | 0.9 | 0.7 | 0.7 | 640  | 1.1 | 0.6 | 0.4 | AT5G54370 | root cap protein 2-related protein                                       |
| 870 | 263209_at | 978  | 1.0 | 0.9 | 1.0 | 1646 | 1.0 | 0.9 | 0.4 | AT1G10522 | expressed protein                                                        |
| 871 | 258495_at | 1403 | 0.8 | 0.8 | 0.9 | 1470 | 1.1 | 0.9 | 0.4 | AT3G02690 | expressed integral membrane protein                                      |
| 872 | 262608_at | 202  | 1.2 | 1.3 | 0.9 | 201  | 1.4 | 0.9 | 0.4 | AT1G14120 | 2-oxoglutarate-dependent dioxygenase, putative                           |
| 873 | 264839_at | 3540 | 1.0 | 1.0 | 1.3 | 4291 | 1.0 | 0.8 | 0.4 | AT1G03630 | protochlorophyllide reductase C (PCR C/POR C)                            |
| 874 | 257474_at | 217  | 1.0 | 1.2 | 1.5 | 766  | 1.1 | 0.6 | 0.4 | AT1G80850 | DNA-3-methyladenine glycosidase -related                                 |
| 875 | 256612_at | 237  | 1.1 | 1.0 | 1.2 | 259  | 1.2 | 0.8 | 0.4 | AT3G29280 | hypothetical protein                                                     |
| 876 | 256671_at | 299  | 0.8 | 0.6 | 0.6 | 408  | 0.9 | 0.7 | 0.4 | AT3G52290 | expressed protein                                                        |
| 877 | 257132_at | 1652 | 1.0 | 0.9 | 1.0 | 1701 | 1.0 | 0.7 | 0.4 | AT3G20230 | expressed protein                                                        |
| 878 | 248962_at | 4383 | 0.9 | 1.0 | 1.2 | 4326 | 1.1 | 0.7 | 0.4 | AT5G45680 | immunophilin / FKBP-type peptidyl-prolyl cis-trans isomerase             |
| 879 | 254911_at | 384  | 1.0 | 0.9 | 1.0 | 372  | 1.2 | 1.0 | 0.4 | AT4G11100 | expressed protein                                                        |
| 880 | 259098_at | 7371 | 1.0 | 0.9 | 1.0 | 9546 | 0.9 | 0.7 | 0.4 | AT3G04790 | ribose 5-phosphate isomerase -related                                    |
| 881 | 251157_at | 7406 | 0.9 | 0.9 | 1.0 | 8778 | 1.0 | 0.7 | 0.4 | AT3G63140 | mRNA binding protein precursor - like                                    |
| 882 | 246548_at | 5781 | 0.9 | 0.9 | 1.1 | 5980 | 0.9 | 0.6 | 0.4 | AT5G14910 | heavy-metal-associated domain-containing protein                         |
| 883 | 255046_at | 7589 | 1.1 | 1.0 | 1.0 | 7791 | 1.0 | 0.8 | 0.4 | AT4G09650 | H <sup>+</sup> -transporting ATP synthase-related protein                |
| 884 | 261196_at | 728  | 0.7 | 0.8 | 0.9 | 685  | 1.0 | 0.6 | 0.4 | AT1G12860 | bHLH protein                                                             |
| 885 | 251141_at | 334  | 0.8 | 0.7 | 0.5 | 245  | 0.8 | 0.8 | 0.4 | AT5G01075 | expressed protein                                                        |
| 886 | 258535_at | 1024 | 0.9 | 1.0 | 1.3 | 1018 | 0.9 | 0.9 | 0.4 | AT3G06750 | proline-rich protein family                                              |
| 887 | 257204_at | 477  | 1.7 | 1.4 | 0.9 | 525  | 0.9 | 0.8 | 0.4 | AT3G23805 | expressed protein                                                        |
| 888 | 253335_at | 1033 | 0.9 | 0.9 | 1.0 | 1292 | 1.0 | 0.7 | 0.4 | AT4G33500 | protein phosphatase 2C (PP2C) -related                                   |
| 889 | 256060_at | 537  | 0.9 | 0.6 | 0.4 | 1104 | 1.0 | 0.9 | 0.4 | AT1G07050 | expressed protein                                                        |
| 890 | 263287_at | 2432 | 1.1 | 1.1 | 1.1 | 2593 | 1.1 | 0.7 | 0.4 | AT2G36145 | expressed protein                                                        |
| 891 | 263842_at | 2257 | 1.1 | 1.0 | 1.1 | 3792 | 0.9 | 0.9 | 0.4 | AT2G36835 | expressed protein                                                        |
| 892 | 262039_at | 248  | 1.0 | 0.6 | 1.0 | 453  | 1.3 | 0.8 | 0.4 | AT1G80050 | adenine phosphoribosyltransferase                                        |
| 893 | 259383_at | 1800 | 0.9 | 0.8 | 0.6 | 1995 | 1.0 | 0.8 | 0.4 | AT3G16470 | jacalin lectin family                                                    |
| 894 | 257143_at | 35   | 1.6 | 1.2 | 1.0 | 112  | 0.9 | 1.1 | 0.4 | AT3G20110 | cytochrome P450 family                                                   |
| 895 | 247563_at | 1019 | 1.0 | 0.9 | 0.9 | 1327 | 0.8 | 0.8 | 0.4 | AT5G61130 | glycosyl hydrolase family 17                                             |
| 896 | 261422_at | 2695 | 0.9 | 1.0 | 1.2 | 3267 | 1.0 | 0.7 | 0.4 | AT1G18730 | expressed protein                                                        |
| 897 | 257891_at | 862  | 0.8 | 0.7 | 0.7 | 805  | 0.9 | 1.0 | 0.4 | AT3G17170 | (RFC3) RPS6-related protein                                              |

|     |             |       |     |     |     |       |     |     |     |           |                                                             |
|-----|-------------|-------|-----|-----|-----|-------|-----|-----|-----|-----------|-------------------------------------------------------------|
| 898 | 261801_at   | 570   | 1.1 | 1.3 | 1.5 | 849   | 1.0 | 0.7 | 0.4 | AT1G30520 | AMP-dependent synthetase and ligase family                  |
| 899 | 247716_at   | 620   | 1.5 | 1.4 | 0.7 | 567   | 1.1 | 0.8 | 0.4 | AT5G59350 | expressed protein                                           |
| 900 | 263109_at   | 100   | 1.0 | 0.8 | 0.7 | 145   | 1.0 | 0.6 | 0.4 | AT1G65180 | CHP-rich zinc finger protein, putative                      |
| 901 | 248427_at   | 914   | 1.0 | 0.8 | 0.8 | 1199  | 1.0 | 0.8 | 0.4 | AT5G51750 | subtilisin-like serine protease                             |
| 902 | 250268_s_at | 1259  | 0.7 | 0.8 | 0.9 | 1158  | 1.0 | 0.9 | 0.4 | AT5G12950 | expressed protein                                           |
| 903 | 250697_at   | 167   | 1.0 | 0.9 | 0.6 | 194   | 0.7 | 0.6 | 0.4 | AT5G06800 | hypothetical protein                                        |
| 904 | 257831_at   | 3374  | 0.9 | 1.0 | 1.1 | 4287  | 0.9 | 0.8 | 0.4 | AT3G26710 | expressed protein                                           |
| 905 | 254910_at   | 1730  | 0.9 | 1.0 | 1.1 | 1914  | 1.1 | 0.9 | 0.4 | AT4G11175 | translation initiation factor IF-1 -related                 |
| 906 | 258159_at   | 399   | 0.9 | 0.7 | 0.8 | 609   | 1.1 | 0.9 | 0.4 | AT3G17840 | leucine-rich repeat transmembrane protein kinase, putative  |
| 907 | 266957_at   | 784   | 1.0 | 0.9 | 1.1 | 1094  | 1.0 | 0.8 | 0.4 | AT2G34640 | expressed protein                                           |
| 908 | 249047_at   | 182   | 0.7 | 0.7 | 0.8 | 157   | 1.1 | 1.1 | 0.4 | AT5G44410 | FAD-linked oxidoreductase family                            |
| 909 | 254697_at   | 646   | 0.7 | 0.6 | 0.4 | 694   | 1.0 | 0.6 | 0.4 | AT4G17970 | expressed protein                                           |
| 910 | 247210_at   | 1700  | 0.9 | 0.8 | 0.8 | 1845  | 1.0 | 0.6 | 0.4 | AT5G65020 | annexin                                                     |
| 911 | 263048_s_at | 2305  | 0.9 | 1.1 | 1.3 | 2263  | 1.1 | 0.8 | 0.4 | AT2G05310 | expressed protein                                           |
| 912 | 257647_at   | 964   | 0.8 | 0.8 | 1.0 | 925   | 1.0 | 0.8 | 0.4 | AT3G25805 | expressed protein                                           |
| 913 | 267555_at   | 148   | 0.9 | 1.1 | 1.2 | 260   | 1.2 | 0.7 | 0.4 | AT2G32765 | ubiquitin family                                            |
| 914 | 254333_at   | 216   | 1.3 | 1.2 | 1.4 | 433   | 0.9 | 0.8 | 0.4 | AT4G22753 | C-4 methyl sterol oxidase, putative                         |
| 915 | 256752_at   | 565   | 1.0 | 0.8 | 0.9 | 673   | 1.0 | 1.0 | 0.4 | AT3G27180 | expressed protein                                           |
| 916 | 251759_at   | 2792  | 0.8 | 0.9 | 1.2 | 3681  | 1.1 | 0.8 | 0.4 | AT3G55630 | folylpolyglutamate-dihydrofolate synthase (dhfs/fpgs4)      |
| 917 | 267359_at   | 150   | 1.0 | 0.9 | 1.2 | 266   | 0.8 | 0.4 | 0.4 | AT2G40020 | expressed protein                                           |
| 918 | 266649_at   | 1066  | 0.9 | 0.9 | 0.8 | 1273  | 0.9 | 0.6 | 0.4 | AT2G25810 | tonoplast intrinsic protein, putative                       |
| 919 | 262543_at   | 254   | 0.9 | 0.5 | 0.3 | 259   | 0.8 | 0.7 | 0.4 | AT1G34245 | expressed protein                                           |
| 920 | 249812_at   | 200   | 1.1 | 0.9 | 1.2 | 447   | 1.4 | 0.7 | 0.4 | AT5G23830 | expressed protein                                           |
| 921 | 252025_at   | 183   | 0.8 | 0.9 | 0.7 | 241   | 1.0 | 0.7 | 0.4 | AT3G52900 | expressed protein                                           |
| 922 | 260385_at   | 1962  | 0.8 | 0.8 | 0.8 | 2750  | 1.1 | 0.8 | 0.4 | AT1G74090 | sulfotransferase family                                     |
| 923 | 251744_at   | 1451  | 1.0 | 1.0 | 1.1 | 1716  | 1.0 | 0.9 | 0.4 | AT3G56010 | expressed protein                                           |
| 924 | 262783_at   | 367   | 1.0 | 0.9 | 0.8 | 354   | 0.9 | 0.8 | 0.4 | AT1G10850 | leucine-rich repeat transmembrane protein kinase, putative  |
| 925 | 266587_at   | 578   | 1.2 | 1.1 | 0.9 | 861   | 0.9 | 0.8 | 0.4 | AT2G14880 | expressed protein                                           |
| 926 | 266209_at   | 243   | 0.9 | 0.7 | 0.8 | 424   | 1.1 | 0.7 | 0.4 | AT2G27550 | terminal flower -related                                    |
| 927 | 259846_at   | 174   | 1.1 | 0.7 | 0.6 | 209   | 0.8 | 0.6 | 0.4 | AT1G72140 | peptide transporter PTR2-B -related                         |
| 928 | 264647_at   | 202   | 0.9 | 0.8 | 0.5 | 229   | 1.0 | 0.7 | 0.4 | AT1G09090 | respiratory burst oxidase protein B (NADPH oxidase) (RbohB) |
| 929 | 247965_at   | 2827  | 0.8 | 0.9 | 0.8 | 2407  | 1.0 | 0.5 | 0.4 | AT5G56540 | arabinogalactan-protein (AGP14)                             |
| 930 | 262937_at   | 863   | 1.0 | 0.8 | 1.0 | 1306  | 1.1 | 0.8 | 0.4 | AT1G79560 | FtsH protease, putative                                     |
| 931 | 262502_at   | 1175  | 1.0 | 1.0 | 0.9 | 1435  | 0.9 | 0.9 | 0.4 | AT1G21600 | expressed protein                                           |
| 932 | 258359_s_at | 12794 | 1.0 | 1.0 | 1.0 | 14441 | 1.0 | 0.8 | 0.4 | AT3G14415 | glycolate oxidase                                           |
| 933 | 256215_at   | 5083  | 1.0 | 1.1 | 1.2 | 4745  | 1.0 | 0.8 | 0.4 | AT1G50900 | expressed protein                                           |

|            |           |      |     |     |     |      |     |     |     |           |                                                                         |
|------------|-----------|------|-----|-----|-----|------|-----|-----|-----|-----------|-------------------------------------------------------------------------|
| <b>934</b> | 255732_at | 1507 | 0.9 | 0.6 | 0.5 | 1584 | 0.9 | 0.7 | 0.4 | AT1G25450 | very-long-chain fatty acid condensing enzyme (CUT1), putative           |
| <b>935</b> | 260969_at | 3288 | 1.5 | 0.9 | 0.5 | 1388 | 1.1 | 0.7 | 0.4 | AT1G12240 | glycosyl hydrolase family 32                                            |
| <b>936</b> | 260028_at | 452  | 1.0 | 1.0 | 1.2 | 897  | 1.0 | 0.8 | 0.4 | AT1G29980 | expressed protein                                                       |
| <b>937</b> | 262354_at | 934  | 1.0 | 0.9 | 0.7 | 1131 | 1.1 | 0.7 | 0.4 | AT1G64200 | H <sup>+</sup> -transporting ATPase protein -related                    |
| <b>938</b> | 254758_at | 281  | 1.0 | 0.7 | 0.6 | 208  | 1.0 | 0.7 | 0.4 | AT4G13260 | flavin-containing monooxygenase (FMO/YUCCA2)                            |
| <b>939</b> | 246517_at | 235  | 1.0 | 0.5 | 0.7 | 225  | 0.8 | 0.8 | 0.4 | AT5G15760 | ribosomal protein 3 precursor-related protein                           |
| <b>940</b> | 259366_at | 239  | 0.9 | 0.8 | 1.1 | 275  | 1.1 | 0.7 | 0.4 | AT1G13280 | allene oxide cyclase family                                             |
| <b>941</b> | 253788_at | 158  | 0.7 | 1.0 | 1.0 | 146  | 0.8 | 0.8 | 0.4 | AT4G28680 | aromatic amino-acid decarboxylase - like protein                        |
| <b>942</b> | 265243_at | 160  | 1.1 | 0.9 | 0.7 | 202  | 0.8 | 0.7 | 0.4 | AT2G43040 | calmodulin-binding protein                                              |
| <b>943</b> | 253440_at | 1269 | 1.0 | 1.0 | 0.9 | 1110 | 1.0 | 0.8 | 0.4 | AT4G32570 | expressed protein                                                       |
| <b>944</b> | 247107_at | 4922 | 0.9 | 0.8 | 0.8 | 4889 | 1.0 | 0.7 | 0.4 | AT5G66040 | senescence-associated protein                                           |
| <b>945</b> | 250216_at | 201  | 1.2 | 0.8 | 0.8 | 267  | 0.8 | 0.8 | 0.4 | AT5G14090 | hypothetical protein                                                    |
| <b>946</b> | 249007_at | 2152 | 1.0 | 0.8 | 0.8 | 2053 | 1.0 | 0.8 | 0.4 | AT5G44650 | expressed protein                                                       |
| <b>947</b> | 246454_at | 3298 | 1.1 | 1.0 | 1.0 | 3763 | 1.0 | 0.7 | 0.4 | AT5G16710 | dehydroascorbate reductase, putative                                    |
| <b>948</b> | 260898_at | 8594 | 1.0 | 0.9 | 1.0 | 9903 | 1.0 | 0.7 | 0.4 | AT1G29070 | plastid ribosomal protein L34 precursor -related                        |
| <b>949</b> | 256721_at | 89   | 1.0 | 0.7 | 0.9 | 166  | 0.9 | 0.7 | 0.4 | AT2G34150 | expressed protein                                                       |
| <b>950</b> | 267294_at | 2637 | 1.3 | 1.2 | 1.1 | 3052 | 1.0 | 0.8 | 0.4 | AT2G23670 | expressed protein                                                       |
| <b>951</b> | 260044_at | 2103 | 0.9 | 1.1 | 1.4 | 2908 | 1.0 | 0.7 | 0.4 | AT1G73655 | immunophilin / FKBP-type peptidyl-prolyl cis-trans isomerase, putative  |
| <b>952</b> | 253278_at | 871  | 0.8 | 0.6 | 0.7 | 587  | 1.0 | 0.7 | 0.4 | AT4G34220 | leucine-rich repeat transmembrane protein kinase, putative              |
| <b>953</b> | 252410_at | 654  | 0.9 | 0.8 | 1.0 | 944  | 0.9 | 0.8 | 0.4 | AT3G47450 | expressed protein                                                       |
| <b>954</b> | 262582_at | 520  | 0.7 | 0.8 | 0.7 | 525  | 1.1 | 0.8 | 0.4 | AT1G15410 | expressed protein                                                       |
| <b>955</b> | 251414_at | 824  | 0.9 | 0.9 | 1.2 | 772  | 1.1 | 0.8 | 0.4 | AT3G60370 | immunophilin / FKBP-type peptidyl-prolyl cis-trans isomerase            |
| <b>956</b> | 261075_at | 1335 | 0.8 | 0.8 | 1.0 | 1758 | 1.1 | 0.9 | 0.4 | AT1G07280 | hypothetical protein                                                    |
| <b>957</b> | 245744_at | 1476 | 1.0 | 0.9 | 0.9 | 1308 | 1.0 | 0.7 | 0.4 | AT1G51110 | plastid-lipid associated protein PAP/fibrillin family                   |
| <b>958</b> | 248502_at | 140  | 1.3 | 2.0 | 1.8 | 411  | 0.8 | 0.8 | 0.4 | AT5G50450 | expressed protein                                                       |
| <b>959</b> | 254501_at | 363  | 1.1 | 0.9 | 0.7 | 436  | 1.0 | 0.9 | 0.4 | AT4G20120 | expressed protein                                                       |
| <b>960</b> | 253582_at | 1481 | 0.8 | 0.7 | 0.4 | 1385 | 1.1 | 0.7 | 0.4 | AT4G30670 | expressed protein                                                       |
| <b>961</b> | 257974_at | 2656 | 1.4 | 1.0 | 0.8 | 1757 | 1.1 | 0.9 | 0.4 | AT3G20820 | disease resistance protein family (LRR)                                 |
| <b>962</b> | 262368_at | 1322 | 0.9 | 0.9 | 1.1 | 1916 | 1.0 | 0.7 | 0.4 | AT1G73060 | expressed protein                                                       |
| <b>963</b> | 245906_at | 392  | 0.9 | 0.8 | 0.9 | 1107 | 0.9 | 1.0 | 0.4 | AT5G11070 | expressed protein                                                       |
| <b>964</b> | 253493_at | 277  | 1.0 | 0.8 | 1.0 | 510  | 0.9 | 0.9 | 0.4 | AT4G31820 | phototropic response protein family                                     |
| <b>965</b> | 262830_at | 751  | 0.9 | 0.9 | 1.3 | 870  | 1.1 | 0.7 | 0.4 | AT1G14700 | calcineurin-like phosphoesterase family                                 |
| <b>966</b> | 255070_at | 708  | 0.8 | 0.7 | 0.8 | 1635 | 1.0 | 1.0 | 0.4 | AT4G09020 | glycoside hydrolase family 13                                           |
| <b>967</b> | 259858_at | 209  | 0.6 | 0.6 | 0.7 | 207  | 1.0 | 0.7 | 0.4 | AT1G68400 | leucine-rich repeat transmembrane protein kinase, putative              |
| <b>968</b> | 263902_at | 287  | 1.0 | 1.0 | 1.0 | 454  | 1.0 | 0.8 | 0.4 | AT2G36230 | phosphoribosylformimino-5-aminoimidazole carboxamide ribotide isomerase |

|             |           |      |     |     |     |      |     |     |     |           |                                                            |
|-------------|-----------|------|-----|-----|-----|------|-----|-----|-----|-----------|------------------------------------------------------------|
| <b>969</b>  | 259838_at | 5741 | 1.0 | 0.9 | 1.1 | 4047 | 1.0 | 0.7 | 0.4 | AT1G52220 | expressed protein                                          |
| <b>970</b>  | 259431_at | 3361 | 0.9 | 0.9 | 0.9 | 2579 | 0.9 | 0.5 | 0.4 | AT1G01620 | plasma membrane intrinsic protein 1c                       |
| <b>971</b>  | 259038_at | 1487 | 0.9 | 0.9 | 1.1 | 1162 | 1.1 | 0.9 | 0.4 | AT3G09210 | expressed protein                                          |
| <b>972</b>  | 262397_at | 1302 | 0.9 | 0.9 | 0.9 | 1508 | 1.2 | 1.0 | 0.4 | AT1G49380 | expressed protein                                          |
| <b>973</b>  | 263599_at | 381  | 0.8 | 0.6 | 0.6 | 513  | 1.0 | 0.9 | 0.4 | AT2G01830 | histidine kinase -related                                  |
| <b>974</b>  | 262894_at | 83   | 1.6 | 1.1 | 1.0 | 118  | 0.6 | 0.7 | 0.4 | AT1G59780 | disease resistance protein (CC-NBS-LRR class), putative    |
| <b>975</b>  | 262577_at | 1085 | 1.1 | 1.0 | 0.9 | 1096 | 1.0 | 0.9 | 0.4 | AT1G15290 | tetratricopeptide repeat (TPR)-containing protein          |
| <b>976</b>  | 250936_at | 580  | 1.0 | 0.7 | 0.4 | 228  | 1.1 | 0.9 | 0.4 | AT5G03120 | expressed protein                                          |
| <b>977</b>  | 265742_at | 1167 | 1.1 | 1.1 | 1.0 | 1228 | 0.9 | 0.7 | 0.4 | AT2G01290 | ribose 5-phosphate isomerase -related                      |
| <b>978</b>  | 247098_at | 874  | 0.9 | 0.8 | 1.1 | 1138 | 1.0 | 0.8 | 0.4 | AT5G66470 | GTP-binding protein-related                                |
| <b>979</b>  | 250102_at | 1282 | 1.0 | 0.8 | 0.7 | 1005 | 0.9 | 0.7 | 0.4 | AT5G16590 | leucine-rich repeat transmembrane protein kinase, putative |
| <b>980</b>  | 253412_at | 678  | 0.9 | 1.0 | 1.1 | 528  | 1.0 | 0.7 | 0.4 | AT4G33000 | calcineurin B-like protein (fragment)                      |
| <b>981</b>  | 249008_at | 956  | 0.6 | 0.4 | 0.5 | 725  | 0.9 | 0.7 | 0.4 | AT5G44680 | expressed protein                                          |
| <b>982</b>  | 254938_at | 763  | 0.9 | 1.0 | 0.8 | 716  | 1.2 | 0.8 | 0.4 | AT4G10770 | oligopeptide transporter -related                          |
| <b>983</b>  | 258845_at | 2336 | 0.9 | 0.8 | 0.9 | 2095 | 1.0 | 0.9 | 0.4 | AT3G03150 | expressed protein                                          |
| <b>984</b>  | 266951_at | 617  | 1.2 | 1.0 | 0.8 | 888  | 0.9 | 0.9 | 0.4 | AT2G18940 | pentatricopeptide (PPR) repeat-containing protein          |
| <b>985</b>  | 266996_at | 489  | 0.9 | 0.7 | 0.6 | 685  | 1.1 | 0.9 | 0.4 | AT2G34490 | cytochrome P450 family                                     |
| <b>986</b>  | 256402_at | 412  | 1.0 | 0.9 | 0.7 | 450  | 0.8 | 0.7 | 0.4 | AT3G06130 | heavy-metal-associated domain-containing protein           |
| <b>987</b>  | 249785_at | 1603 | 0.9 | 0.9 | 1.0 | 1922 | 1.0 | 0.7 | 0.4 | AT5G24300 | starch synthase, putative                                  |
| <b>988</b>  | 262283_at | 5875 | 1.0 | 0.9 | 1.0 | 6015 | 0.9 | 0.7 | 0.4 | AT1G68590 | expressed protein                                          |
| <b>989</b>  | 248185_at | 40   | 2.1 | 0.6 | 0.7 | 174  | 1.6 | 1.6 | 0.4 | AT5G54060 | glycosyltransferase family                                 |
| <b>990</b>  | 258662_at | 954  | 1.0 | 1.0 | 1.1 | 1249 | 0.9 | 0.7 | 0.4 | AT3G02900 | expressed protein                                          |
| <b>991</b>  | 257168_at | 2556 | 0.8 | 0.7 | 1.1 | 3310 | 1.0 | 0.7 | 0.4 | AT3G24430 | mrp protein -related                                       |
| <b>992</b>  | 254145_at | 354  | 1.1 | 1.0 | 1.1 | 354  | 1.2 | 0.9 | 0.4 | AT4G24700 | expressed protein                                          |
| <b>993</b>  | 254305_at | 384  | 1.1 | 0.8 | 0.8 | 498  | 1.2 | 1.1 | 0.4 | AT4G22200 | potassium channel (K <sup>+</sup> transporter 2)(AKT2)     |
| <b>994</b>  | 262411_at | 629  | 0.8 | 0.6 | 0.5 | 507  | 1.0 | 0.8 | 0.4 | AT1G34640 | expressed protein                                          |
| <b>995</b>  | 248838_at | 2819 | 1.0 | 1.1 | 1.1 | 3845 | 1.0 | 0.7 | 0.4 | AT5G46800 | mitochondrial carrier protein family                       |
| <b>996</b>  | 249778_at | 4109 | 1.0 | 0.9 | 0.9 | 4839 | 1.0 | 0.9 | 0.4 | AT5G24165 | expressed protein                                          |
| <b>997</b>  | 248181_at | 1775 | 0.9 | 0.9 | 1.0 | 2198 | 1.0 | 0.7 | 0.4 | AT5G54290 | cytochrome c biogenesis protein precursor (gb AAF35369.1)  |
| <b>998</b>  | 266300_at | 723  | 1.6 | 1.3 | 0.7 | 778  | 1.1 | 0.8 | 0.4 | AT2G01420 | auxin transport protein, putative                          |
| <b>999</b>  | 264959_at | 1870 | 1.1 | 1.0 | 1.1 | 1750 | 1.1 | 0.8 | 0.4 | AT1G77090 | thylakoid lumenal 29.8 kDa protein                         |
| <b>1000</b> | 251886_at | 435  | 0.9 | 0.9 | 1.1 | 551  | 1.1 | 0.9 | 0.4 | AT3G54260 | expressed protein                                          |
| <b>1001</b> | 252441_at | 5258 | 1.0 | 0.9 | 1.0 | 3906 | 1.0 | 0.7 | 0.4 | AT3G46780 | expressed protein                                          |
| <b>1002</b> | 254092_at | 111  | 1.1 | 0.8 | 0.5 | 220  | 1.0 | 0.8 | 0.4 | AT4G25090 | respiratory burst oxidase (NADPH oxidase), putative        |
| <b>1003</b> | 262467_at | 189  | 1.1 | 1.2 | 1.7 | 217  | 1.0 | 0.7 | 0.4 | AT1G50240 | expressed protein                                          |
| <b>1004</b> | 261563_at | 1653 | 0.9 | 0.7 | 0.5 | 1882 | 1.0 | 0.7 | 0.4 | AT1G01630 | SEC14 cytosolic factor, putative                           |
| <b>1005</b> | 251881_at | 249  | 0.9 | 0.7 | 0.7 | 319  | 0.9 | 0.8 | 0.4 | AT3G54250 | mevalonate diphosphate decarboxylase, putative             |

|             |             |      |     |     |      |      |     |     |     |           |                                                                              |
|-------------|-------------|------|-----|-----|------|------|-----|-----|-----|-----------|------------------------------------------------------------------------------|
| <b>1006</b> | 248186_at   | 550  | 0.8 | 0.8 | 0.8  | 1113 | 1.0 | 0.8 | 0.4 | AT5G53880 | expressed protein                                                            |
| <b>1007</b> | 263163_at   | 536  | 1.0 | 0.8 | 0.7  | 643  | 1.1 | 0.9 | 0.4 | AT1G03160 | fructokinase -related                                                        |
| <b>1008</b> | 253040_at   | 5826 | 0.9 | 0.8 | 0.8  | 4760 | 1.1 | 0.9 | 0.4 | AT4G37800 | xyloglucan endotransglycosylase, putative                                    |
| <b>1009</b> | 261421_at   | 397  | 0.9 | 0.8 | 0.6  | 479  | 0.9 | 0.6 | 0.4 | AT1G18840 | expressed protein                                                            |
| <b>1010</b> | 244982_at   | 1109 | 0.7 | 0.7 | 0.8  | 1350 | 1.0 | 0.6 | 0.4 | ATCG00780 | ribosomal protein L14 (RPL14)                                                |
| <b>1011</b> | 260412_at   | 2987 | 0.8 | 0.8 | 1.0  | 3840 | 0.9 | 0.7 | 0.4 | AT1G69830 | alpha-amylase (1,4-alpha-D-glucan glucanohydrolase), putative                |
| <b>1012</b> | 246483_at   | 455  | 0.6 | 0.5 | 0.4  | 419  | 0.9 | 0.8 | 0.4 | AT5G16000 | receptor protein kinase-related protein                                      |
| <b>1013</b> | 267308_at   | 962  | 1.1 | 0.9 | 1.0  | 1390 | 0.9 | 0.8 | 0.4 | AT2G30200 | malonyl-CoA:Acyl carrier protein transacylase -related                       |
| <b>1014</b> | 247401_at   | 2516 | 0.9 | 1.1 | 1.3  | 3403 | 1.1 | 0.7 | 0.4 | AT5G62790 | 1-deoxy-D-xylulose 5-phosphate reductoisomerase (DXR)                        |
| <b>1015</b> | 261118_at   | 1876 | 1.2 | 1.2 | 1.6  | 2526 | 1.2 | 0.9 | 0.4 | AT1G75460 | protease -related                                                            |
| <b>1016</b> | 259276_at   | 1383 | 1.0 | 0.8 | 0.5  | 1495 | 1.0 | 0.7 | 0.4 | AT3G01190 | peroxidase, putative                                                         |
| <b>1017</b> | 245876_at   | 1228 | 1.0 | 0.9 | 0.9  | 1517 | 1.0 | 0.8 | 0.4 | AT1G26230 | chaperonin, putative                                                         |
| <b>1018</b> | 244990_s_at | 242  | 0.5 | 0.7 | 0.8  | 285  | 1.2 | 0.8 | 0.4 | ATCG00870 | ORF77                                                                        |
| <b>1019</b> | 254038_at   | 1124 | 0.9 | 0.9 | 0.9  | 1225 | 1.0 | 0.9 | 0.4 | AT4G25910 | nitrogen fixation protein, putative (NifU)                                   |
| <b>1020</b> | 259348_at   | 307  | 0.7 | 0.5 | 0.5  | 734  | 1.1 | 0.9 | 0.4 | AT3G03770 | leucine-rich repeat transmembrane protein kinase, putative                   |
| <b>1021</b> | 259763_at   | 311  | 1.1 | 0.8 | 0.8  | 332  | 0.9 | 0.8 | 0.4 | AT1G77630 | expressed protein                                                            |
| <b>1022</b> | 247447_at   | 97   | 1.0 | 0.8 | 0.8  | 173  | 0.9 | 0.8 | 0.4 | AT5G62730 | nitrate transporter NTL1 - like protein                                      |
| <b>1023</b> | 262316_at   | 421  | 0.9 | 0.9 | 1.0  | 591  | 1.0 | 0.8 | 0.4 | AT2G48120 | pale cress protein                                                           |
| <b>1024</b> | 254283_s_at | 17   | 7.2 | 1.0 | 13.7 | 293  | 2.6 | 2.1 | 0.4 | AT4G22870 | leucoanthocyanidin dioxygenase (anthocyanidin synthase) (LDOX/ANS), putative |
| <b>1025</b> | 254133_at   | 522  | 0.9 | 0.7 | 0.8  | 722  | 0.9 | 0.9 | 0.4 | AT4G24810 | hypothetical protein                                                         |
| <b>1026</b> | 251107_at   | 132  | 1.0 | 0.7 | 0.8  | 155  | 0.9 | 0.6 | 0.4 | AT5G01610 | expressed protein                                                            |
| <b>1027</b> | 254505_at   | 709  | 1.0 | 1.1 | 1.1  | 899  | 1.0 | 0.7 | 0.4 | AT4G19985 | GCN5-related N-acetyltransferase (GNAT) family                               |
| <b>1028</b> | 262721_at   | 2944 | 0.8 | 1.0 | 1.2  | 3759 | 1.0 | 0.8 | 0.4 | AT1G43560 | thioredoxin family                                                           |
| <b>1029</b> | 253740_at   | 641  | 0.9 | 0.9 | 1.1  | 847  | 1.0 | 0.7 | 0.4 | AT4G28706 | pfkB type carbohydrate kinase protein family                                 |
| <b>1030</b> | 266423_at   | 160  | 1.3 | 0.7 | 0.8  | 122  | 1.0 | 0.7 | 0.4 | AT2G41340 | eukaryotic rpb5 RNA polymerase subunit family                                |
| <b>1031</b> | 257180_at   | 394  | 1.0 | 1.0 | 1.0  | 568  | 1.0 | 0.8 | 0.4 | AT3G13180 | sun protein (fmu protein) -related                                           |
| <b>1032</b> | 257516_at   | 510  | 0.7 | 0.6 | 0.6  | 535  | 1.0 | 0.9 | 0.4 | AT1G69040 | uridylyltransferase-related                                                  |
| <b>1033</b> | 254239_at   | 4305 | 0.8 | 0.7 | 0.7  | 2970 | 1.1 | 0.7 | 0.4 | AT4G23400 | major intrinsic protein (MIP) family                                         |
| <b>1034</b> | 252409_at   | 6924 | 1.0 | 1.0 | 1.1  | 9258 | 0.9 | 0.7 | 0.4 | AT3G47650 | expressed protein                                                            |
| <b>1035</b> | 244934_at   | 994  | 0.6 | 0.7 | 0.9  | 1278 | 1.0 | 0.6 | 0.4 | ATCG01080 | NADH dehydrogenase subunit 6 (NDHG)                                          |
| <b>1036</b> | 265773_at   | 1632 | 1.0 | 0.8 | 0.9  | 1851 | 1.1 | 0.8 | 0.4 | AT2G48070 | expressed protein                                                            |
| <b>1037</b> | 253340_s_at | 486  | 0.9 | 0.7 | 0.7  | 504  | 0.8 | 0.4 | 0.4 | AT4G33260 | WD-40 repeat protein family                                                  |
| <b>1038</b> | 261814_at   | 168  | 0.8 | 1.3 | 1.1  | 300  | 1.1 | 0.9 | 0.4 | AT1G08310 | esterase/lipase/thioesterase family                                          |
| <b>1039</b> | 249691_at   | 1397 | 0.8 | 0.9 | 1.1  | 1673 | 1.0 | 0.8 | 0.4 | AT5G36170 | peptide chain release factor, putative                                       |
| <b>1040</b> | 261577_at   | 1807 | 0.9 | 0.9 | 1.0  | 2273 | 1.0 | 0.8 | 0.4 | AT1G01080 | 33 kDa ribonucleoprotein, chloroplast (RNA-binding protein cp33), putative   |

|             |             |      |     |     |     |      |     |     |     |           |                                                                                    |
|-------------|-------------|------|-----|-----|-----|------|-----|-----|-----|-----------|------------------------------------------------------------------------------------|
| <b>1041</b> | 254612_at   | 649  | 1.0 | 1.1 | 1.2 | 600  | 1.1 | 0.8 | 0.4 | AT4G19100 | hypothetical protein                                                               |
| <b>1042</b> | 248402_at   | 739  | 1.0 | 1.0 | 1.3 | 915  | 1.0 | 0.8 | 0.4 | AT5G52100 | dihydrodipicolinate reductase-related protein                                      |
| <b>1043</b> | 262980_at   | 1953 | 1.0 | 0.8 | 0.8 | 2113 | 1.1 | 0.8 | 0.4 | AT1G75680 | glycosyl hydrolase family 9                                                        |
| <b>1044</b> | 259264_at   | 255  | 0.5 | 0.5 | 0.8 | 353  | 1.1 | 0.8 | 0.4 | AT3G01260 | aldose 1-epimerase family                                                          |
| <b>1045</b> | 263915_at   | 444  | 1.0 | 0.9 | 0.8 | 555  | 1.0 | 0.7 | 0.4 | AT2G36430 | expressed protein                                                                  |
| <b>1046</b> | 253849_at   | 4039 | 0.9 | 0.8 | 1.0 | 5585 | 1.0 | 0.8 | 0.4 | AT4G28080 | expressed protein                                                                  |
| <b>1047</b> | 256603_at   | 62   | 1.8 | 0.5 | 0.6 | 239  | 1.5 | 0.9 | 0.4 | AT3G28270 | At14a                                                                              |
| <b>1048</b> | 266648_at   | 1110 | 1.0 | 0.9 | 0.9 | 1228 | 0.9 | 0.8 | 0.4 | AT2G25840 | tryptophanyl-tRNA synthetase -related                                              |
| <b>1049</b> | 261930_at   | 815  | 0.8 | 0.7 | 0.6 | 792  | 1.1 | 0.7 | 0.4 | AT1G22440 | alcohol dehydrogenase (ADH), putative                                              |
| <b>1050</b> | 256468_at   | 2589 | 0.8 | 0.8 | 1.0 | 2513 | 1.1 | 0.9 | 0.4 | AT1G32550 | ferredoxin family                                                                  |
| <b>1051</b> | 267053_s_at | 1219 | 0.9 | 0.7 | 0.5 | 2910 | 1.2 | 0.8 | 0.4 | AT2G38390 | peroxidase, putative                                                               |
| <b>1052</b> | 259999_at   | 355  | 0.7 | 0.6 | 0.8 | 476  | 0.9 | 0.7 | 0.4 | AT1G68080 | hypothetical protein                                                               |
| <b>1053</b> | 266621_at   | 704  | 0.9 | 1.0 | 1.1 | 734  | 1.0 | 0.7 | 0.4 | AT2G35450 | expressed protein                                                                  |
| <b>1054</b> | 252427_at   | 917  | 0.8 | 0.7 | 0.4 | 769  | 1.1 | 0.6 | 0.4 | AT3G47640 | bHLH protein family                                                                |
| <b>1055</b> | 249009_at   | 763  | 0.8 | 0.8 | 0.6 | 420  | 1.1 | 0.8 | 0.4 | AT5G44610 | expressed protein                                                                  |
| <b>1056</b> | 255554_at   | 462  | 0.8 | 0.9 | 1.0 | 465  | 1.0 | 0.7 | 0.4 | AT4G01895 | NIMIN-1b protein {Arabidopsis thaliana} -related                                   |
| <b>1057</b> | 261871_at   | 249  | 1.1 | 1.4 | 1.5 | 378  | 1.2 | 0.7 | 0.4 | AT1G11440 | serine/threonine protein kinase emb]CAA69216 -related                              |
| <b>1058</b> | 245852_at   | 8360 | 1.0 | 0.9 | 1.1 | 9096 | 1.0 | 0.7 | 0.4 | AT5G13510 | ribosomal protein L10p family                                                      |
| <b>1059</b> | 256754_at   | 3734 | 1.0 | 1.2 | 1.4 | 5294 | 1.2 | 1.0 | 0.4 | AT3G25690 | expressed protein                                                                  |
| <b>1060</b> | 248075_at   | 495  | 0.9 | 0.7 | 0.8 | 454  | 1.1 | 0.8 | 0.4 | AT5G55740 | pentatricopeptide (PPR) repeat-containing protein                                  |
| <b>1061</b> | 249482_at   | 5277 | 0.9 | 1.2 | 1.3 | 9406 | 1.0 | 0.8 | 0.4 | AT5G38980 | expressed protein                                                                  |
| <b>1062</b> | 251038_at   | 3163 | 1.0 | 0.9 | 0.9 | 4957 | 1.1 | 0.8 | 0.4 | AT5G02240 | expressed protein                                                                  |
| <b>1063</b> | 262819_at   | 168  | 0.9 | 0.9 | 1.1 | 189  | 1.0 | 0.6 | 0.4 | AT1G11600 | cytochrome P450, putative                                                          |
| <b>1064</b> | 261507_at   | 762  | 1.0 | 1.1 | 1.2 | 871  | 0.9 | 0.7 | 0.4 | AT1G71720 | RIBOSOMAL PROTEIN -related                                                         |
| <b>1065</b> | 264734_at   | 74   | 0.6 | 0.6 | 1.2 | 102  | 1.1 | 0.6 | 0.4 | AT1G62280 | expressed protein                                                                  |
| <b>1066</b> | 247216_at   | 1211 | 0.8 | 0.8 | 0.9 | 1365 | 1.0 | 0.7 | 0.4 | AT5G64860 | glycosyl hydrolase family 77 (4-alpha-glucanotransferase)                          |
| <b>1067</b> | 245326_at   | 673  | 1.1 | 0.9 | 0.9 | 704  | 1.0 | 1.0 | 0.4 | AT4G14100 | expressed protein                                                                  |
| <b>1068</b> | 251993_at   | 4546 | 0.9 | 0.8 | 0.9 | 5493 | 0.9 | 0.7 | 0.4 | AT3G52960 | peroxiredoxin - like protein                                                       |
| <b>1069</b> | 266275_at   | 741  | 1.0 | 1.1 | 1.1 | 794  | 1.0 | 0.7 | 0.4 | AT2G29370 | short-chain dehydrogenase/reductase family protein (tropinone reductase, putative) |
| <b>1070</b> | 249421_at   | 2014 | 0.8 | 0.8 | 0.8 | 2136 | 1.0 | 0.7 | 0.4 | AT5G39830 | DegP protease                                                                      |
| <b>1071</b> | 251287_at   | 1377 | 0.8 | 0.6 | 0.6 | 1706 | 1.0 | 1.0 | 0.4 | AT3G61820 | expressed protein                                                                  |
| <b>1072</b> | 267402_at   | 270  | 1.0 | 0.9 | 1.0 | 264  | 0.9 | 0.6 | 0.4 | AT2G26180 | SF16 protein {Helianthus annuus} -related                                          |
| <b>1073</b> | 254392_at   | 330  | 0.9 | 0.8 | 0.7 | 355  | 1.0 | 0.7 | 0.4 | AT4G21600 | endonuclease -related                                                              |
| <b>1074</b> | 267553_s_at | 1739 | 1.0 | 1.0 | 1.3 | 2499 | 0.8 | 0.9 | 0.4 | AT2G32650 | expressed protein                                                                  |
| <b>1075</b> | 251665_at   | 309  | 1.1 | 0.8 | 1.1 | 325  | 1.0 | 0.6 | 0.4 | AT3G57040 | responce reactor 4                                                                 |
| <b>1076</b> | 254259_s_at | 543  | 0.9 | 1.0 | 0.9 | 755  | 1.1 | 0.7 | 0.4 | AT4G23420 | oxidoreductase famly                                                               |

|             |           |      |     |     |     |       |     |     |     |           |                                                                 |
|-------------|-----------|------|-----|-----|-----|-------|-----|-----|-----|-----------|-----------------------------------------------------------------|
| <b>1077</b> | 266035_at | 1660 | 1.0 | 0.9 | 0.9 | 2216  | 1.0 | 0.8 | 0.4 | AT2G05990 | enoyl-(acyl-carrier protein) reductase (NADH) (enr-A), putative |
| <b>1078</b> | 255850_at | 8013 | 1.0 | 0.9 | 0.9 | 8525  | 0.9 | 0.7 | 0.4 | AT2G33450 | 50S ribosomal protein L28, chloroplast precursor (CL28)         |
| <b>1079</b> | 250057_at | 1048 | 0.8 | 0.9 | 0.9 | 1382  | 0.9 | 0.9 | 0.4 | AT5G17840 | expressed protein                                               |
| <b>1080</b> | 263763_at | 994  | 1.0 | 0.9 | 1.0 | 1382  | 0.9 | 0.7 | 0.4 | AT2G21385 | expressed protein                                               |
| <b>1081</b> | 246860_at | 607  | 0.6 | 0.7 | 0.4 | 787   | 1.2 | 0.8 | 0.4 | AT5G25840 | expressed protein                                               |
| <b>1082</b> | 251661_at | 847  | 0.8 | 0.9 | 0.7 | 1590  | 0.9 | 0.7 | 0.4 | AT3G56950 | expressed protein                                               |
| <b>1083</b> | 248493_at | 782  | 1.0 | 1.0 | 1.3 | 1454  | 1.0 | 0.8 | 0.4 | AT5G51100 | iron superoxide dismutase, putative                             |
| <b>1084</b> | 244975_at | 4876 | 0.8 | 0.7 | 0.7 | 4033  | 1.1 | 0.8 | 0.4 | ATCG00710 | photosystem II phosphoprotein (PSBH)                            |
| <b>1085</b> | 250379_at | 188  | 0.8 | 0.5 | 0.6 | 175   | 0.7 | 0.7 | 0.4 | AT5G11590 | AP2 domain transcription factor TINY, putative                  |
| <b>1086</b> | 256856_at | 1523 | 1.0 | 1.2 | 1.4 | 1758  | 1.1 | 0.8 | 0.4 | AT3G15110 | expressed protein                                               |
| <b>1087</b> | 247118_at | 187  | 1.1 | 0.8 | 0.9 | 207   | 1.1 | 0.5 | 0.4 | AT5G65890 | ACT domain-containing protein                                   |
| <b>1088</b> | 246908_at | 7591 | 1.0 | 0.8 | 0.6 | 10050 | 1.0 | 0.8 | 0.4 | AT5G25610 | dehydration-induced protein RD22                                |
| <b>1089</b> | 262377_at | 833  | 1.0 | 1.0 | 1.1 | 918   | 1.0 | 0.8 | 0.4 | AT1G73110 | rubisco activase -related                                       |
| <b>1090</b> | 267586_at | 1572 | 1.0 | 0.7 | 0.7 | 1723  | 0.8 | 0.9 | 0.4 | AT2G41950 | expressed protein                                               |
| <b>1091</b> | 261883_at | 328  | 0.7 | 0.4 | 0.4 | 245   | 1.1 | 0.8 | 0.4 | AT1G80870 | protein kinase family                                           |
| <b>1092</b> | 262172_at | 3695 | 1.0 | 1.0 | 1.0 | 4290  | 0.9 | 0.7 | 0.4 | AT1G74970 | ribosomal protein S9 -related                                   |
| <b>1093</b> | 262479_at | 82   | 1.4 | 0.9 | 0.9 | 154   | 1.1 | 0.9 | 0.4 | AT1G11130 | leucine rich repeat protein kinase family                       |
| <b>1094</b> | 248828_at | 3799 | 0.8 | 1.0 | 1.1 | 4115  | 1.0 | 0.8 | 0.4 | AT5G47110 | Lil3 protein                                                    |
| <b>1095</b> | 251008_at | 690  | 1.0 | 0.9 | 1.1 | 723   | 1.0 | 1.0 | 0.4 | AT5G02710 | expressed protein                                               |
| <b>1096</b> | 246135_at | 702  | 1.0 | 0.7 | 0.4 | 1003  | 1.0 | 0.6 | 0.4 | AT5G20885 | C3HC4-type zinc finger protein family                           |
| <b>1097</b> | 249288_at | 931  | 0.8 | 0.8 | 1.0 | 1000  | 1.1 | 0.9 | 0.4 | AT5G41050 | expressed protein                                               |
| <b>1098</b> | 257759_at | 597  | 0.8 | 0.7 | 0.9 | 527   | 1.2 | 0.7 | 0.4 | AT3G23070 | expressed protein                                               |
| <b>1099</b> | 247182_at | 378  | 0.9 | 0.8 | 0.6 | 340   | 1.1 | 1.1 | 0.4 | AT5G65410 | expressed protein                                               |
| <b>1100</b> | 267465_at | 249  | 0.7 | 0.8 | 0.8 | 302   | 1.1 | 0.6 | 0.4 | AT2G19170 | subtilisin-like serine protease                                 |
| <b>1101</b> | 267344_at | 244  | 1.1 | 0.8 | 0.8 | 239   | 1.1 | 0.8 | 0.4 | AT2G44230 | expressed protein                                               |
| <b>1102</b> | 266946_at | 231  | 0.7 | 0.6 | 0.6 | 248   | 1.0 | 0.7 | 0.4 | AT2G18890 | protein kinase family                                           |
| <b>1103</b> | 245492_at | 329  | 0.9 | 0.8 | 1.0 | 532   | 1.0 | 0.8 | 0.4 | AT4G16340 | expressed protein                                               |
| <b>1104</b> | 262811_at | 389  | 0.6 | 0.4 | 0.2 | 443   | 1.1 | 1.1 | 0.4 | AT1G11700 | expressed protein                                               |
| <b>1105</b> | 253600_at | 1171 | 1.0 | 0.8 | 1.1 | 1774  | 1.0 | 0.7 | 0.4 | AT4G30810 | serine carboxypeptidase -related                                |
| <b>1106</b> | 253842_at | 579  | 0.9 | 0.7 | 0.6 | 728   | 1.1 | 0.8 | 0.4 | AT4G27860 | expressed protein                                               |
| <b>1107</b> | 261407_at | 417  | 1.8 | 1.1 | 0.4 | 245   | 1.2 | 0.7 | 0.4 | AT1G18810 | expressed protein                                               |
| <b>1108</b> | 262000_at | 3045 | 1.0 | 1.0 | 1.1 | 3571  | 1.0 | 0.8 | 0.4 | AT1G33810 | expressed protein                                               |
| <b>1109</b> | 245002_at | 4244 | 0.8 | 0.6 | 0.6 | 2841  | 1.0 | 0.8 | 0.4 | ATCG00270 | photosystem II protein D2 (PSBD)                                |
| <b>1110</b> | 251221_at | 1922 | 0.6 | 1.1 | 2.3 | 5003  | 0.9 | 1.0 | 0.4 | AT3G62550 | expressed protein                                               |
| <b>1111</b> | 255447_at | 1709 | 0.9 | 0.8 | 1.1 | 1905  | 1.0 | 0.9 | 0.4 | AT4G02790 | expressed protein                                               |
| <b>1112</b> | 248409_at | 1182 | 0.9 | 0.9 | 1.0 | 1312  | 0.9 | 0.7 | 0.4 | AT5G51540 | hypothetical protein                                            |
| <b>1113</b> | 255294_at | 170  | 1.1 | 0.7 | 0.4 | 362   | 1.2 | 0.9 | 0.4 | AT4G04750 | sugar transporter family                                        |

|             |           |      |     |     |     |       |     |     |     |           |                                                                                                                                    |
|-------------|-----------|------|-----|-----|-----|-------|-----|-----|-----|-----------|------------------------------------------------------------------------------------------------------------------------------------|
| <b>1114</b> | 260618_at | 976  | 0.9 | 0.8 | 0.7 | 1605  | 0.9 | 0.8 | 0.4 | AT1G53230 | transcription factor 3 (TCP3)                                                                                                      |
| <b>1115</b> | 261491_at | 256  | 1.1 | 0.6 | 0.5 | 251   | 0.8 | 0.7 | 0.4 | AT1G14350 | myb family transcription factor                                                                                                    |
| <b>1116</b> | 259525_at | 226  | 1.1 | 0.8 | 0.7 | 176   | 1.4 | 0.9 | 0.4 | AT1G12560 | expansin, putative (EXP7)                                                                                                          |
| <b>1117</b> | 261175_at | 436  | 0.8 | 0.7 | 0.7 | 305   | 0.9 | 0.6 | 0.4 | AT1G04800 | glycine-rich protein                                                                                                               |
| <b>1118</b> | 265319_at | 5540 | 0.9 | 0.9 | 1.0 | 6406  | 0.9 | 0.7 | 0.4 | AT2G22670 | auxin-responsive protein IAA8 (Indoleacetic acid-induced protein 8)                                                                |
| <b>1119</b> | 260548_at | 1508 | 0.9 | 0.8 | 0.7 | 1645  | 0.9 | 0.8 | 0.4 | AT2G43360 | biotin synthase (BioB) (BIO2)                                                                                                      |
| <b>1120</b> | 254502_at | 664  | 0.9 | 0.8 | 0.9 | 754   | 1.1 | 0.8 | 0.4 | AT4G20130 | expressed protein                                                                                                                  |
| <b>1121</b> | 262809_at | 636  | 0.9 | 0.8 | 0.9 | 831   | 1.0 | 0.8 | 0.4 | AT1G11720 | starch synthase, putative                                                                                                          |
| <b>1122</b> | 253028_at | 1285 | 1.1 | 0.8 | 0.9 | 1072  | 1.0 | 0.9 | 0.4 | AT4G38160 | expressed protein                                                                                                                  |
| <b>1123</b> | 252172_at | 120  | 0.8 | 1.4 | 0.9 | 183   | 0.9 | 0.7 | 0.4 | AT3G50640 | expressed protein                                                                                                                  |
| <b>1124</b> | 263219_at | 180  | 1.2 | 1.1 | 1.3 | 342   | 0.9 | 0.6 | 0.4 | AT1G30600 | serine proteinase -related                                                                                                         |
| <b>1125</b> | 251387_at | 486  | 0.9 | 0.9 | 1.2 | 463   | 1.0 | 0.7 | 0.4 | AT3G60810 | expressed protein                                                                                                                  |
| <b>1126</b> | 245165_at | 1509 | 1.1 | 1.1 | 1.2 | 1218  | 1.1 | 0.8 | 0.4 | AT2G33180 | expressed protein                                                                                                                  |
| <b>1127</b> | 262536_at | 4944 | 1.5 | 1.3 | 1.0 | 8047  | 1.0 | 0.9 | 0.4 | AT1G17100 | SOUL-related protein                                                                                                               |
| <b>1128</b> | 255809_at | 5178 | 0.9 | 0.9 | 1.1 | 6134  | 1.0 | 0.8 | 0.4 | AT4G10300 | expressed protein                                                                                                                  |
| <b>1129</b> | 257911_at | 2138 | 0.9 | 1.0 | 1.1 | 3073  | 1.0 | 0.8 | 0.4 | AT3G25530 | gamma hydroxybutyrate dehydrogenase                                                                                                |
| <b>1130</b> | 261826_at | 1579 | 0.9 | 0.7 | 0.7 | 2528  | 0.9 | 0.8 | 0.4 | AT1G11580 | pectin methylesterase, putative                                                                                                    |
| <b>1131</b> | 263760_at | 1969 | 1.1 | 1.0 | 0.9 | 2824  | 1.0 | 0.8 | 0.4 | AT2G21280 | expressed protein                                                                                                                  |
| <b>1132</b> | 252040_at | 895  | 0.8 | 0.7 | 0.8 | 1181  | 1.1 | 0.8 | 0.4 | AT3G52060 | expressed protein                                                                                                                  |
| <b>1133</b> | 261696_at | 242  | 0.8 | 0.9 | 0.8 | 419   | 1.0 | 0.6 | 0.4 | AT1G08470 | strictosidine synthase-related                                                                                                     |
| <b>1134</b> | 260284_at | 3690 | 0.8 | 0.8 | 0.9 | 2975  | 1.0 | 0.7 | 0.4 | AT1G80380 | auxin-regulated protein                                                                                                            |
| <b>1135</b> | 253774_at | 102  | 0.9 | 0.9 | 0.5 | 111   | 1.0 | 0.7 | 0.4 | AT4G28530 | No apical meristem (NAM) protein family                                                                                            |
| <b>1136</b> | 255437_at | 114  | 0.7 | 0.5 | 0.9 | 220   | 0.9 | 0.9 | 0.4 | AT4G03060 | 2-oxoglutarate-dependent dioxygenase (AOP2)                                                                                        |
| <b>1137</b> | 250261_at | 1113 | 0.9 | 0.6 | 0.4 | 983   | 0.9 | 0.7 | 0.4 | AT5G13400 | peptide transporter - like protein                                                                                                 |
| <b>1138</b> | 266774_at | 251  | 1.1 | 0.6 | 0.5 | 187   | 0.8 | 0.7 | 0.4 | AT2G29050 | membrane protein, Rhomboid family                                                                                                  |
| <b>1139</b> | 252048_at | 2134 | 0.8 | 0.7 | 0.9 | 2148  | 0.9 | 0.7 | 0.4 | AT3G52500 | expressed protein                                                                                                                  |
| <b>1140</b> | 253090_at | 1641 | 1.2 | 1.0 | 0.8 | 2468  | 1.0 | 1.0 | 0.4 | AT4G36360 | glycosyl hydrolase family 35 (beta-galactosidase)                                                                                  |
| <b>1141</b> | 247131_at | 8904 | 1.1 | 1.1 | 1.3 | 11599 | 0.9 | 0.7 | 0.4 | AT5G66190 | ferredoxin--NADP(+) reductase (adrenodoxin reductase), putative                                                                    |
| <b>1142</b> | 261504_at | 68   | 1.0 | 1.2 | 1.3 | 105   | 1.1 | 0.6 | 0.4 | AT1G71692 | MADS-box protein                                                                                                                   |
| <b>1143</b> | 261054_at | 285  | 1.3 | 0.7 | 0.5 | 252   | 1.2 | 1.2 | 0.4 | AT1G01330 | hypothetical protein                                                                                                               |
| <b>1144</b> | 262743_at | 238  | 1.3 | 0.9 | 0.5 | 313   | 1.0 | 0.9 | 0.4 | AT1G29020 | calcium-binding EF-hand family protein                                                                                             |
| <b>1145</b> | 247201_at | 7160 | 1.0 | 0.9 | 1.1 | 7494  | 1.0 | 0.8 | 0.4 | AT5G65220 | ribosomal protein L29p family                                                                                                      |
| <b>1146</b> | 255675_at | 204  | 1.0 | 0.9 | 0.7 | 178   | 1.1 | 1.0 | 0.5 | AT4G00480 | MYC transcription factor (Atmyc1)                                                                                                  |
| <b>1147</b> | 248552_at | 1971 | 0.8 | 0.8 | 1.1 | 2324  | 1.0 | 0.9 | 0.5 | AT5G50250 | 31 kDa ribonucleoprotein, chloroplast (RNA-binding protein RNP-T / RNA-binding protein 1/2/3 / RNA-binding protein cp31), putative |



|      |             |      |     |     |     |       |     |     |     |           |                                                     |
|------|-------------|------|-----|-----|-----|-------|-----|-----|-----|-----------|-----------------------------------------------------|
| 1148 | 263432_at   | 1415 | 1.1 | 0.9 | 0.9 | 1793  | 1.0 | 0.8 | 0.5 | AT2G22230 | beta-hydroxyacyl-ACP dehydratase family             |
| 1149 | 253477_at   | 562  | 0.9 | 0.9 | 1.0 | 610   | 0.9 | 0.8 | 0.5 | AT4G32320 | ascorbate peroxidase family                         |
| 1150 | 246952_at   | 174  | 1.0 | 0.6 | 0.3 | 221   | 1.0 | 0.8 | 0.5 | AT5G04820 | expressed protein                                   |
| 1151 | 246097_at   | 1524 | 0.9 | 0.7 | 0.3 | 1229  | 1.0 | 0.6 | 0.5 | AT5G20270 | expressed protein                                   |
| 1152 | 254141_at   | 2563 | 1.1 | 0.9 | 1.0 | 3203  | 1.0 | 0.8 | 0.5 | AT4G24620 | glucose-6-phosphate isomerase                       |
| 1153 | 246885_at   | 104  | 0.9 | 1.0 | 0.7 | 117   | 1.2 | 0.9 | 0.5 | AT5G26230 | expressed protein                                   |
| 1154 | 248634_at   | 927  | 1.0 | 0.9 | 1.0 | 1393  | 1.1 | 0.8 | 0.5 | AT5G49030 | isoleucyl-tRNA synthetase                           |
| 1155 | 252077_at   | 126  | 1.1 | 1.0 | 1.6 | 181   | 1.0 | 0.5 | 0.5 | AT3G51720 | expressed protein                                   |
| 1156 | 245321_at   | 8113 | 0.9 | 0.9 | 1.0 | 8023  | 1.0 | 0.8 | 0.5 | AT4G15545 | expressed protein                                   |
| 1157 | 257217_at   | 1823 | 0.8 | 0.7 | 0.7 | 3015  | 1.2 | 0.8 | 0.5 | AT3G14940 | phosphoenolpyruvate carboxylase (PPC)               |
| 1158 | 247376_at   | 2777 | 1.0 | 1.0 | 1.2 | 3926  | 1.0 | 0.7 | 0.5 | AT5G63310 | nucleotide diphosphate kinase Ia (emb CAB58230.1)   |
| 1159 | 257203_at   | 634  | 0.9 | 0.6 | 0.6 | 371   | 1.0 | 0.7 | 0.5 | AT3G23730 | xyloglucan endotransglycosylase, putative           |
| 1160 | 244970_at   | 1376 | 0.8 | 0.7 | 0.8 | 1712  | 0.8 | 0.6 | 0.5 | ATCG00660 | ribosomal protein L20 (RPL20)                       |
| 1161 | 245479_at   | 337  | 1.7 | 1.6 | 1.0 | 227   | 1.0 | 0.8 | 0.5 | AT4G16140 | proline-rich protein family                         |
| 1162 | 253285_at   | 565  | 0.8 | 0.8 | 0.8 | 334   | 0.9 | 0.7 | 0.5 | AT4G34250 | fatty acid elongase 1 (FAE1), putative              |
| 1163 | 263285_at   | 178  | 0.6 | 1.3 | 0.9 | 243   | 0.8 | 0.7 | 0.5 | AT2G36120 | glycine-rich protein                                |
| 1164 | 254635_at   | 206  | 1.0 | 1.1 | 1.2 | 256   | 0.9 | 0.7 | 0.5 | AT4G18670 | leucine-rich repeat extensin family                 |
| 1165 | 261388_at   | 992  | 1.0 | 0.9 | 1.0 | 776   | 1.0 | 0.8 | 0.5 | AT1G05385 | expressed protein                                   |
| 1166 | 267549_at   | 796  | 1.3 | 1.0 | 0.7 | 864   | 1.1 | 0.9 | 0.5 | AT2G32640 | expressed protein                                   |
| 1167 | 252092_at   | 3093 | 0.9 | 1.0 | 1.2 | 3059  | 1.0 | 0.9 | 0.5 | AT3G51420 | strictosidine synthase-related                      |
| 1168 | 257954_at   | 696  | 1.4 | 1.5 | 1.1 | 1056  | 1.0 | 0.8 | 0.5 | AT3G21760 | glycosyltransferase family                          |
| 1169 | 260165_at   | 8084 | 1.2 | 1.0 | 1.0 | 9616  | 0.9 | 0.7 | 0.5 | AT1G79850 | chloroplast 30S ribosomal protein S17 (CS17)        |
| 1170 | 246673_at   | 8806 | 1.1 | 1.0 | 1.2 | 11356 | 1.0 | 0.7 | 0.5 | AT5G30510 | ribosomal protein S1                                |
| 1171 | 255104_at   | 2970 | 1.2 | 1.0 | 1.0 | 4629  | 1.1 | 0.9 | 0.5 | AT4G08685 | expressed protein                                   |
| 1172 | 266335_at   | 588  | 0.8 | 0.9 | 1.0 | 583   | 0.9 | 0.6 | 0.5 | AT2G32440 | ent-kaurenoic acid oxidase / cytochrome P450 CYP88A |
| 1173 | 247478_at   | 3754 | 0.9 | 0.6 | 0.2 | 1249  | 0.9 | 1.2 | 0.5 | AT5G62360 | pectinesterase family                               |
| 1174 | 249644_at   | 144  | 1.2 | 1.0 | 1.2 | 176   | 0.8 | 0.6 | 0.5 | AT5G37010 | serine-rich protein -related                        |
| 1175 | 263131_at   | 6708 | 1.1 | 0.9 | 1.1 | 7725  | 1.0 | 0.7 | 0.5 | AT1G78630 | ribosomal protein L13p family                       |
| 1176 | 244997_at   | 2051 | 1.0 | 0.7 | 0.7 | 2307  | 0.9 | 0.6 | 0.5 | ATCG00170 | RNA polymerase beta (RPOC2)                         |
| 1177 | 265377_at   | 2570 | 0.9 | 0.9 | 1.0 | 2018  | 1.0 | 0.6 | 0.5 | AT2G05790 | glycosyl hydrolase family 17                        |
| 1178 | 248624_at   | 1166 | 0.8 | 0.8 | 0.9 | 998   | 1.0 | 0.7 | 0.5 | AT5G48790 | expressed protein                                   |
| 1179 | 258386_at   | 974  | 1.2 | 1.1 | 1.2 | 1127  | 1.0 | 0.8 | 0.5 | AT3G15520 | peptidyl-prolycis-trans isomerase protein           |
| 1180 | 247651_at   | 2559 | 0.8 | 0.6 | 0.7 | 3965  | 0.9 | 0.6 | 0.5 | AT5G59870 | histone H2A, putative                               |
| 1181 | 254693_at   | 423  | 0.6 | 0.4 | 0.2 | 260   | 1.3 | 1.0 | 0.5 | AT4G17880 | bHLH protein family                                 |
| 1182 | 265819_at   | 1018 | 0.9 | 0.9 | 0.8 | 909   | 1.1 | 1.0 | 0.5 | AT2G17972 | expressed protein                                   |
| 1183 | 261149_s_at | 4537 | 0.9 | 0.8 | 0.8 | 6497  | 1.0 | 0.9 | 0.5 | AT1G19570 | dehydroascorbate reductase, putative                |
| 1184 | 264442_at   | 1277 | 1.3 | 1.2 | 1.2 | 1283  | 1.1 | 0.8 | 0.5 | AT1G27480 | expressed protein                                   |

|      |             |       |     |     |     |       |     |     |     |           |                                                                   |
|------|-------------|-------|-----|-----|-----|-------|-----|-----|-----|-----------|-------------------------------------------------------------------|
| 1185 | 266925_at   | 4583  | 0.9 | 0.9 | 0.9 | 4771  | 1.0 | 0.9 | 0.5 | AT2G45740 | expressed protein                                                 |
| 1186 | 263678_at   | 1951  | 1.0 | 0.9 | 1.1 | 2038  | 1.0 | 0.7 | 0.5 | AT1G04420 | aldo/keto reductase family                                        |
| 1187 | 260872_at   | 1361  | 1.0 | 0.9 | 1.0 | 1514  | 1.0 | 0.7 | 0.5 | AT1G21350 | expressed protein                                                 |
| 1188 | 250891_at   | 367   | 0.9 | 0.6 | 0.7 | 285   | 1.0 | 0.8 | 0.5 | AT5G04530 | beta-ketoacyl-CoA synthase family                                 |
| 1189 | 245747_at   | 729   | 1.1 | 0.8 | 0.9 | 555   | 1.0 | 0.8 | 0.5 | AT1G51100 | expressed protein                                                 |
| 1190 | 262175_at   | 1421  | 1.0 | 1.1 | 1.2 | 1771  | 1.0 | 0.8 | 0.5 | AT1G74880 | expressed protein                                                 |
| 1191 | 257190_at   | 7793  | 1.0 | 1.0 | 1.1 | 8439  | 1.0 | 0.7 | 0.5 | AT3G13120 | chloroplast 30S ribosomal protein S10, putative                   |
| 1192 | 258552_at   | 657   | 0.7 | 0.4 | 0.5 | 471   | 0.9 | 0.5 | 0.5 | AT3G07010 | polysaccharide lyase family 1 (pectate lyase)                     |
| 1193 | 263737_at   | 720   | 0.6 | 0.6 | 0.7 | 1039  | 1.2 | 0.9 | 0.5 | AT1G60010 | expressed protein                                                 |
| 1194 | 252629_at   | 366   | 0.9 | 0.9 | 0.6 | 617   | 1.3 | 1.1 | 0.5 | AT3G44970 | cytochrome P450 family                                            |
| 1195 | 247297_at   | 5259  | 1.1 | 0.8 | 0.5 | 3444  | 1.1 | 0.8 | 0.5 | AT5G64100 | peroxidase, putative                                              |
| 1196 | 251174_at   | 881   | 0.7 | 0.4 | 0.4 | 1039  | 1.2 | 1.0 | 0.5 | AT3G63200 | patatin-related                                                   |
| 1197 | 249658_s_at | 7553  | 0.9 | 0.9 | 1.1 | 9262  | 1.0 | 0.8 | 0.5 | AT5G36700 | phosphoglycolate phosphatase, putative                            |
| 1198 | 256983_at   | 4020  | 1.0 | 0.7 | 0.7 | 6096  | 0.9 | 0.9 | 0.5 | AT3G13470 | chaperonin, putative                                              |
| 1199 | 260769_at   | 560   | 0.8 | 0.8 | 0.9 | 759   | 1.0 | 0.9 | 0.5 | AT1G49010 | expressed protein                                                 |
| 1200 | 254468_at   | 276   | 0.8 | 0.5 | 0.5 | 366   | 1.1 | 0.8 | 0.5 | AT4G20460 | NAD-dependent epimerase/dehydratase family                        |
| 1201 | 261338_at   | 2197  | 1.0 | 1.0 | 1.1 | 2424  | 1.0 | 1.0 | 0.5 | AT1G44920 | expressed protein                                                 |
| 1202 | 261536_at   | 2047  | 0.9 | 0.9 | 1.0 | 2427  | 1.1 | 0.6 | 0.5 | AT1G01790 | K <sup>+</sup> efflux antiporter, putative (KEA1)                 |
| 1203 | 247239_at   | 362   | 0.9 | 0.8 | 0.6 | 355   | 0.9 | 0.7 | 0.5 | AT5G64640 | pectinesterase family                                             |
| 1204 | 255645_at   | 692   | 0.8 | 1.0 | 1.3 | 601   | 1.2 | 0.8 | 0.5 | AT4G00880 | auxin-induced (indole-3-acetic acid induced) protein family       |
| 1205 | 259737_at   | 733   | 0.9 | 0.7 | 0.5 | 1112  | 1.0 | 0.8 | 0.5 | AT1G64400 | long-chain-fatty-acid--CoA ligase (acyl-CoA synthetase), putative |
| 1206 | 258161_at   | 3282  | 1.0 | 0.9 | 1.0 | 3168  | 1.1 | 1.1 | 0.5 | AT3G17930 | expressed protein                                                 |
| 1207 | 246783_at   | 253   | 1.1 | 1.1 | 1.2 | 273   | 1.1 | 0.9 | 0.5 | AT5G27360 | sugar-porter family protein 2                                     |
| 1208 | 253622_at   | 101   | 1.0 | 1.0 | 0.9 | 159   | 1.3 | 0.8 | 0.5 | AT4G30560 | cyclic nucleotide-regulated ion channel, putative (CNGC9)         |
| 1209 | 259892_at   | 17760 | 1.1 | 1.0 | 1.0 | 21946 | 0.9 | 0.8 | 0.5 | AT1G72610 | germin-like protein (AtGER1)                                      |
| 1210 | 259081_at   | 648   | 0.7 | 0.7 | 0.7 | 792   | 1.0 | 0.9 | 0.5 | AT3G05030 | sodium proton exchanger, putative (NHX2)                          |
| 1211 | 265121_at   | 185   | 0.8 | 0.6 | 0.6 | 368   | 1.2 | 0.9 | 0.5 | AT1G62560 | flavin-containing monooxygenase (FMO) family                      |
| 1212 | 261740_at   | 1013  | 1.0 | 0.9 | 0.8 | 1092  | 0.9 | 0.8 | 0.5 | AT1G47740 | expressed protein                                                 |
| 1213 | 261415_at   | 832   | 0.9 | 0.7 | 0.6 | 955   | 0.9 | 0.7 | 0.5 | AT1G07750 | globulin (seed storage protein) - related                         |
| 1214 | 252391_at   | 3379  | 0.8 | 0.9 | 0.9 | 3528  | 1.0 | 0.8 | 0.5 | AT3G47860 | expressed protein                                                 |
| 1215 | 251442_at   | 1032  | 1.0 | 0.9 | 0.9 | 1510  | 0.9 | 0.8 | 0.5 | AT3G59980 | expressed protein                                                 |
| 1216 | 251119_at   | 540   | 0.9 | 0.9 | 1.0 | 765   | 1.2 | 0.8 | 0.5 | AT3G63510 | nitrogen regulation protein family (NIFR3)                        |
| 1217 | 259768_at   | 1502  | 0.8 | 0.9 | 1.0 | 2120  | 1.0 | 0.7 | 0.5 | AT1G29390 | expressed protein                                                 |
| 1218 | 258341_at   | 118   | 1.1 | 0.6 | 1.0 | 168   | 1.0 | 0.6 | 0.5 | AT3G22790 | expressed protein                                                 |
| 1219 | 258528_at   | 804   | 0.8 | 0.6 | 0.7 | 803   | 1.0 | 0.7 | 0.5 | AT3G06770 | polygalacturonase, putative                                       |
| 1220 | 251083_at   | 580   | 1.2 | 0.7 | 1.1 | 802   | 1.1 | 0.9 | 0.5 | AT5G01590 | expressed protein                                                 |

|             |             |       |     |     |     |       |     |     |     |           |                                                                                                       |
|-------------|-------------|-------|-----|-----|-----|-------|-----|-----|-----|-----------|-------------------------------------------------------------------------------------------------------|
| <b>1221</b> | 246033_at   | 3545  | 1.0 | 1.0 | 1.2 | 3593  | 0.9 | 0.7 | 0.5 | AT5G08280 | hydroxymethylbilane synthase (porphobilinogen deaminase, chloroplast) (pre-uroporphyrinogen synthase) |
| <b>1222</b> | 251762_at   | 13701 | 1.0 | 1.0 | 1.2 | 15401 | 1.0 | 0.7 | 0.5 | AT3G55800 | sedoheptulose-bisphosphatase precursor                                                                |
| <b>1223</b> | 258156_at   | 2367  | 0.9 | 0.7 | 0.6 | 1609  | 1.0 | 0.8 | 0.5 | AT3G18050 | expressed protein                                                                                     |
| <b>1224</b> | 244993_s_at | 3456  | 0.8 | 0.8 | 0.9 | 3960  | 1.0 | 0.6 | 0.5 | ATCG01000 | ycf1                                                                                                  |
| <b>1225</b> | 252248_at   | 156   | 0.9 | 0.8 | 0.8 | 190   | 0.9 | 0.4 | 0.5 | AT3G49750 | leucine rich repeat protein family                                                                    |
| <b>1226</b> | 264250_at   | 2387  | 0.7 | 0.6 | 0.5 | 2730  | 1.1 | 0.9 | 0.5 | AT1G78680 | gamma-glutamyl hydrolase (gamma-Glu-X carboxypeptidase/conjugase)                                     |
| <b>1227</b> | 247235_at   | 573   | 0.8 | 0.8 | 0.9 | 722   | 0.9 | 0.8 | 0.5 | AT5G64580 | expressed protein                                                                                     |
| <b>1228</b> | 261572_at   | 3259  | 0.9 | 0.9 | 1.3 | 2554  | 1.1 | 0.8 | 0.5 | AT1G01170 | expressed protein                                                                                     |
| <b>1229</b> | 250337_at   | 784   | 1.1 | 0.7 | 0.5 | 956   | 1.1 | 0.9 | 0.5 | AT5G11790 | Ndr family                                                                                            |
| <b>1230</b> | 253109_at   | 765   | 0.8 | 0.8 | 0.9 | 909   | 1.0 | 0.8 | 0.5 | AT4G35920 | expressed protein                                                                                     |
| <b>1231</b> | 252180_at   | 229   | 1.0 | 0.6 | 0.4 | 287   | 1.2 | 0.8 | 0.5 | AT3G50630 | Kip-related protein 2                                                                                 |
| <b>1232</b> | 254117_at   | 1569  | 0.9 | 0.9 | 1.3 | 1763  | 1.0 | 0.6 | 0.5 | AT4G24750 | expressed protein                                                                                     |
| <b>1233</b> | 247768_at   | 400   | 1.1 | 0.9 | 0.8 | 507   | 1.0 | 0.9 | 0.5 | AT5G58900 | I-box binding factor - like protein                                                                   |
| <b>1234</b> | 261053_at   | 5311  | 1.1 | 0.7 | 0.7 | 5294  | 0.9 | 0.9 | 0.5 | AT1G01320 | tetratricopeptide repeat (TPR)-containing protein                                                     |
| <b>1235</b> | 256396_at   | 318   | 0.7 | 0.7 | 0.7 | 289   | 1.2 | 1.0 | 0.5 | AT3G06150 | expressed protein                                                                                     |
| <b>1236</b> | 262748_at   | 466   | 0.9 | 0.9 | 0.7 | 468   | 1.0 | 0.8 | 0.5 | AT1G28610 | lipase, putative                                                                                      |
| <b>1237</b> | 252877_at   | 110   | 1.0 | 1.1 | 1.1 | 147   | 1.0 | 0.6 | 0.5 | AT4G39630 | expressed protein                                                                                     |
| <b>1238</b> | 256115_at   | 8061  | 1.0 | 1.0 | 1.2 | 9579  | 1.0 | 0.8 | 0.5 | AT1G16880 | expressed protein                                                                                     |
| <b>1239</b> | 258181_at   | 3758  | 0.9 | 0.8 | 0.9 | 2928  | 1.1 | 0.8 | 0.5 | AT3G21670 | nitrate transporter                                                                                   |
| <b>1240</b> | 245993_at   | 5279  | 0.9 | 0.6 | 0.5 | 6778  | 1.0 | 0.8 | 0.5 | AT5G20700 | senescence-associated protein -related                                                                |
| <b>1241</b> | 258412_at   | 4811  | 0.9 | 0.8 | 0.7 | 5248  | 0.9 | 0.7 | 0.5 | AT3G17210 | expressed protein                                                                                     |
| <b>1242</b> | 253205_at   | 1605  | 1.0 | 0.8 | 0.6 | 2427  | 1.0 | 0.8 | 0.5 | AT4G34490 | cyclase associated protein CAP -related                                                               |
| <b>1243</b> | 251720_at   | 379   | 1.1 | 0.9 | 0.7 | 418   | 1.1 | 0.7 | 0.5 | AT3G56160 | hypothetical protein                                                                                  |
| <b>1244</b> | 264638_at   | 89    | 1.4 | 1.5 | 1.1 | 253   | 0.7 | 0.7 | 0.5 | AT1G65480 | flowering signals mediating protein FT                                                                |
| <b>1245</b> | 246198_at   | 941   | 0.9 | 0.8 | 1.1 | 1081  | 1.0 | 0.9 | 0.5 | AT4G36810 | geranylgeranyl pyrophosphate synthase (GGPS1)(farnesyltranstransferase)                               |
| <b>1246</b> | 245930_at   | 339   | 0.9 | 0.9 | 1.0 | 312   | 0.9 | 0.7 | 0.5 | AT5G09240 | transcriptional co-activator-related protein                                                          |
| <b>1247</b> | 260831_at   | 436   | 0.9 | 1.0 | 2.1 | 972   | 0.8 | 0.3 | 0.5 | AT1G06830 | glutaredoxin protein family                                                                           |
| <b>1248</b> | 244984_at   | 6323  | 0.8 | 0.8 | 1.0 | 7089  | 1.0 | 0.7 | 0.5 | ATCG00800 | ribosomal protein S3 (RPS3)                                                                           |
| <b>1249</b> | 252050_at   | 145   | 1.0 | 0.8 | 0.6 | 141   | 1.1 | 0.9 | 0.5 | AT3G52550 | hypothetical protein                                                                                  |
| <b>1250</b> | 252823_at   | 648   | 0.9 | 0.9 | 0.9 | 690   | 1.1 | 0.7 | 0.5 | AT4G40045 | expressed protein                                                                                     |
| <b>1251</b> | 259193_at   | 3658  | 0.9 | 0.9 | 1.1 | 4558  | 0.9 | 0.7 | 0.5 | AT3G01480 | thylakoid lumen rotamase                                                                              |
| <b>1252</b> | 262646_at   | 381   | 0.7 | 0.8 | 0.8 | 429   | 1.0 | 0.8 | 0.5 | AT1G62800 | aspartate aminotransferase, cytoplasmic isozyme 2 (transaminase A/Asp4)                               |
| <b>1253</b> | 247069_at   | 1192  | 1.0 | 0.8 | 0.8 | 1285  | 1.0 | 0.8 | 0.5 | AT5G66920 | pectinesterase (pectin methylesterase) family                                                         |
| <b>1254</b> | 259878_at   | 1176  | 0.9 | 1.0 | 0.9 | 2080  | 1.1 | 0.8 | 0.5 | AT1G76790 | O-methyltransferase family 2                                                                          |

|             |             |       |     |     |     |       |     |     |     |           |                                                                                     |
|-------------|-------------|-------|-----|-----|-----|-------|-----|-----|-----|-----------|-------------------------------------------------------------------------------------|
| <b>1255</b> | 258006_at   | 451   | 0.7 | 0.8 | 0.7 | 687   | 0.9 | 0.6 | 0.5 | AT3G19400 | cysteine proteinase                                                                 |
| <b>1256</b> | 265545_at   | 201   | 0.8 | 0.7 | 0.8 | 363   | 1.2 | 0.9 | 0.5 | AT2G28250 | protein kinase family                                                               |
| <b>1257</b> | 256706_at   | 428   | 0.9 | 0.7 | 0.6 | 409   | 1.0 | 0.8 | 0.5 | AT3G30300 | auxin-independent growth promoter -related                                          |
| <b>1258</b> | 252989_at   | 772   | 0.9 | 0.8 | 0.9 | 582   | 1.1 | 0.8 | 0.5 | AT4G38420 | pectinesterase (pectin methylesterase), putative                                    |
| <b>1259</b> | 246288_at   | 991   | 0.9 | 0.6 | 0.7 | 1056  | 1.0 | 0.7 | 0.5 | AT1G31850 | dehydration-induced protein, putative                                               |
| <b>1260</b> | 267430_at   | 3794  | 0.9 | 1.0 | 1.1 | 4414  | 1.0 | 0.8 | 0.5 | AT2G34860 | expressed protein                                                                   |
| <b>1261</b> | 248652_at   | 264   | 1.0 | 0.7 | 0.7 | 307   | 1.0 | 0.8 | 0.5 | AT5G49270 | expressed protein                                                                   |
| <b>1262</b> | 266533_s_at | 9861  | 0.9 | 0.9 | 1.0 | 9418  | 1.0 | 0.6 | 0.5 | AT2G16850 | putative plasma membrane intrinsic protein                                          |
| <b>1263</b> | 258977_s_at | 906   | 1.0 | 1.0 | 1.0 | 1328  | 1.1 | 0.9 | 0.5 | AT3G02020 | aspartate kinase, lysine-sensitive, putative                                        |
| <b>1264</b> | 250985_at   | 603   | 0.9 | 0.8 | 0.9 | 720   | 1.0 | 0.6 | 0.5 | AT5G02830 | pentatricopeptide (PPR) repeat-containing protein                                   |
| <b>1265</b> | 247278_at   | 910   | 0.9 | 1.0 | 1.2 | 815   | 1.1 | 0.9 | 0.5 | AT5G64380 | fructose-bisphosphatase-related protein                                             |
| <b>1266</b> | 264820_at   | 1552  | 0.9 | 0.9 | 1.1 | 2026  | 1.0 | 0.8 | 0.5 | AT1G03475 | coproporphyrinogen III oxidase (coproporphyrinogenase) (coprogen oxidase), putative |
| <b>1267</b> | 258281_at   | 1474  | 0.9 | 0.9 | 1.1 | 1375  | 1.0 | 0.7 | 0.5 | AT3G26900 | shikimate kinase family                                                             |
| <b>1268</b> | 257699_at   | 12064 | 1.0 | 0.9 | 1.1 | 14647 | 0.9 | 0.7 | 0.5 | AT3G12780 | phosphoglycerate kinase -related                                                    |
| <b>1269</b> | 248377_at   | 3128  | 0.9 | 0.9 | 1.9 | 1283  | 0.9 | 0.7 | 0.5 | AT5G51720 | expressed protein                                                                   |
| <b>1270</b> | 260523_at   | 913   | 0.9 | 0.9 | 0.8 | 929   | 1.0 | 1.0 | 0.5 | AT2G41720 | pentatricopeptide (PPR) repeat-containing protein                                   |
| <b>1271</b> | 256698_at   | 414   | 1.1 | 1.1 | 1.3 | 488   | 0.9 | 0.9 | 0.5 | AT3G20680 | expressed protein                                                                   |
| <b>1272</b> | 263942_at   | 674   | 1.0 | 0.8 | 0.7 | 980   | 1.0 | 0.9 | 0.5 | AT2G35860 | expressed protein                                                                   |
| <b>1273</b> | 258269_at   | 1152  | 0.9 | 0.8 | 0.7 | 1120  | 1.0 | 0.9 | 0.5 | AT3G15690 | acetyl-CoA carboxylase biotin-containing subunit -related                           |
| <b>1274</b> | 248285_at   | 2120  | 0.9 | 0.9 | 1.0 | 1583  | 1.2 | 0.9 | 0.5 | AT5G52960 | expressed protein                                                                   |
| <b>1275</b> | 250613_at   | 412   | 0.5 | 0.2 | 0.4 | 424   | 1.2 | 1.1 | 0.5 | AT5G07240 | expressed protein                                                                   |
| <b>1276</b> | 255249_at   | 303   | 1.0 | 1.0 | 1.1 | 381   | 1.1 | 0.9 | 0.5 | AT4G05090 | 3(2),5-BISPHOSPHATE NUCLEOTIDASE -related protein                                   |
| <b>1277</b> | 246269_at   | 212   | 1.1 | 0.8 | 0.6 | 195   | 1.0 | 0.6 | 0.5 | AT4G37110 | expressed protein                                                                   |
| <b>1278</b> | 267435_at   | 5209  | 0.9 | 1.0 | 1.2 | 6417  | 0.9 | 0.7 | 0.5 | AT2G33800 | ribosomal protein S5 family                                                         |
| <b>1279</b> | 260181_at   | 322   | 0.9 | 0.8 | 0.9 | 387   | 0.9 | 0.7 | 0.5 | AT1G70710 | glycosyl hydrolase family 9 (endo-1,4-beta-glucanase)                               |
| <b>1280</b> | 267220_at   | 374   | 0.9 | 0.9 | 1.1 | 501   | 1.1 | 0.8 | 0.5 | AT2G02500 | sugar nucleotide phosphorylase -related                                             |
| <b>1281</b> | 254384_at   | 2588  | 1.1 | 1.1 | 0.9 | 1212  | 1.0 | 1.0 | 0.5 | AT4G21870 | heat shock protein family                                                           |
| <b>1282</b> | 260207_at   | 1995  | 0.9 | 0.9 | 1.0 | 2697  | 1.1 | 0.9 | 0.5 | AT1G70730 | phosphoglucomutase -related                                                         |
| <b>1283</b> | 245231_at   | 84    | 1.1 | 1.1 | 1.2 | 148   | 0.6 | 0.6 | 0.5 | AT4G25600 | ShTK domain-containing protein                                                      |
| <b>1284</b> | 258989_at   | 1427  | 1.0 | 1.0 | 1.1 | 1458  | 1.0 | 0.7 | 0.5 | AT3G08920 | rhodanese-like domain protein                                                       |
| <b>1285</b> | 252548_at   | 588   | 0.9 | 0.7 | 0.9 | 550   | 0.9 | 0.7 | 0.5 | AT3G45850 | kinesin-related protein                                                             |
| <b>1286</b> | 246899_at   | 207   | 1.0 | 0.8 | 0.9 | 225   | 1.1 | 0.8 | 0.5 | AT5G25590 | expressed protein                                                                   |
| <b>1287</b> | 251646_at   | 127   | 1.1 | 0.7 | 0.8 | 153   | 1.2 | 1.2 | 0.5 | AT3G57780 | expressed protein                                                                   |
| <b>1288</b> | 257985_at   | 211   | 0.9 | 0.7 | 0.8 | 2855  | 1.2 | 0.9 | 0.5 | AT3G20810 | expressed protein                                                                   |
| <b>1289</b> | 255792_at   | 249   | 1.1 | 1.0 | 1.2 | 461   | 1.1 | 0.8 | 0.5 | AT2G33620 | AT-hook DNA-binding protein (AHP1)                                                  |
| <b>1290</b> | 267152_at   | 5722  | 0.9 | 1.0 | 1.1 | 5955  | 1.0 | 0.8 | 0.5 | AT2G31040 | expressed protein                                                                   |
| <b>1291</b> | 266478_at   | 651   | 0.9 | 0.8 | 0.8 | 856   | 0.9 | 0.8 | 0.5 | AT2G31170 | cysteinyl-tRNA synthetase -related                                                  |

|             |             |       |     |     |     |       |     |     |     |           |                                                                                                                                    |
|-------------|-------------|-------|-----|-----|-----|-------|-----|-----|-----|-----------|------------------------------------------------------------------------------------------------------------------------------------|
| <b>1292</b> | 249235_at   | 2150  | 0.9 | 0.9 | 0.8 | 2343  | 1.0 | 0.8 | 0.5 | AT5G42100 | glycosyl hydrolase family 17                                                                                                       |
| <b>1293</b> | 255302_at   | 1673  | 1.0 | 0.7 | 1.0 | 2784  | 1.1 | 0.9 | 0.5 | AT4G04830 | expressed protein                                                                                                                  |
| <b>1294</b> | 261788_at   | 5065  | 0.9 | 0.9 | 1.2 | 4261  | 1.0 | 0.7 | 0.5 | AT1G15980 | expressed protein                                                                                                                  |
| <b>1295</b> | 250428_at   | 2910  | 0.9 | 0.7 | 0.5 | 2525  | 0.9 | 0.7 | 0.5 | AT5G10480 | protein phosphatase -related                                                                                                       |
| <b>1296</b> | 260837_at   | 5611  | 1.0 | 0.9 | 1.1 | 4770  | 0.9 | 0.7 | 0.5 | AT1G43670 | fructose 1,6-bisphosphatase -related                                                                                               |
| <b>1297</b> | 260130_s_at | 2170  | 0.7 | 0.9 | 0.9 | 2380  | 1.0 | 0.6 | 0.5 | AT1G66280 | glycosyl hydrolase family 1                                                                                                        |
| <b>1298</b> | 261165_at   | 871   | 0.8 | 0.9 | 1.0 | 1077  | 1.0 | 0.7 | 0.5 | AT1G34430 | dihydrolipoamide S-acetyltransferase -related                                                                                      |
| <b>1299</b> | 251995_at   | 733   | 0.8 | 0.7 | 0.7 | 662   | 0.9 | 0.8 | 0.5 | AT3G52940 | C-14 sterol reductase (delta(14)-sterol reductase) (FACKEL) (FK)                                                                   |
| <b>1300</b> | 259943_at   | 822   | 1.1 | 1.0 | 1.1 | 716   | 1.1 | 0.8 | 0.5 | AT1G71480 | expressed protein                                                                                                                  |
| <b>1301</b> | 250058_at   | 1737  | 1.2 | 1.0 | 1.1 | 2183  | 0.9 | 0.7 | 0.5 | AT5G17870 | plastid-specific ribosomal protein 6 precursor (Psrp-6) - like                                                                     |
| <b>1302</b> | 248399_at   | 382   | 0.9 | 0.9 | 0.7 | 376   | 1.0 | 1.1 | 0.5 | AT5G52010 | expressed protein                                                                                                                  |
| <b>1303</b> | 254126_at   | 5256  | 1.1 | 1.0 | 1.2 | 6308  | 1.0 | 0.8 | 0.5 | AT4G24770 | 31 kDa ribonucleoprotein, chloroplast (RNA-binding protein RNP-T / RNA-binding protein 1/2/3 / RNA-binding protein cp31), putative |
| <b>1304</b> | 244932_at   | 2679  | 0.7 | 0.7 | 0.6 | 2286  | 0.9 | 0.7 | 0.5 | ATCG01060 | photosystem I subunit VII (PSAC)                                                                                                   |
| <b>1305</b> | 261189_at   | 1645  | 1.1 | 0.9 | 0.9 | 2020  | 1.0 | 1.0 | 0.5 | AT1G33040 | expressed protein                                                                                                                  |
| <b>1306</b> | 244938_at   | 526   | 0.9 | 0.7 | 0.7 | 598   | 1.1 | 0.7 | 0.5 | ATCG01120 | ribosomal protein S15 (RPS15)                                                                                                      |
| <b>1307</b> | 250333_at   | 278   | 1.0 | 1.0 | 1.2 | 351   | 1.0 | 0.8 | 0.5 | AT5G11690 | membrane translocase - like protein                                                                                                |
| <b>1308</b> | 250812_at   | 663   | 0.9 | 1.0 | 1.1 | 705   | 1.0 | 0.8 | 0.5 | AT5G04900 | short-chain dehydrogenase/reductase family protein                                                                                 |
| <b>1309</b> | 254601_at   | 218   | 1.1 | 1.0 | 1.0 | 305   | 0.9 | 0.7 | 0.5 | AT4G19020 | chromomethylase CMT2                                                                                                               |
| <b>1310</b> | 245291_at   | 1312  | 0.9 | 1.0 | 1.1 | 1604  | 1.0 | 0.7 | 0.5 | AT4G16155 | dihydrolipoamide dehydrogenase 2, plastidic (lipoamide dehydrogenase 2) (ptlpd2)                                                   |
| <b>1311</b> | 252317_at   | 847   | 0.8 | 0.5 | 0.4 | 621   | 1.0 | 0.9 | 0.5 | AT3G48720 | transferase family                                                                                                                 |
| <b>1312</b> | 262784_at   | 6640  | 1.0 | 0.8 | 0.8 | 6898  | 1.0 | 0.9 | 0.5 | AT1G10760 | SEX1 protein; nuclear gene for chloroplast product                                                                                 |
| <b>1313</b> | 251736_at   | 904   | 1.0 | 0.8 | 0.8 | 932   | 0.9 | 0.8 | 0.5 | AT3G56130 | expressed protein                                                                                                                  |
| <b>1314</b> | 267157_at   | 1210  | 1.0 | 0.9 | 0.7 | 1722  | 1.0 | 0.9 | 0.5 | AT2G37630 | myb family transcription factor (MYB91)                                                                                            |
| <b>1315</b> | 245867_at   | 2024  | 0.9 | 1.0 | 0.9 | 3276  | 0.9 | 0.8 | 0.5 | AT1G58080 | ATP phosphoribosyl transferase                                                                                                     |
| <b>1316</b> | 263709_at   | 16738 | 1.1 | 1.0 | 0.9 | 19436 | 0.9 | 0.8 | 0.5 | AT1G09310 | expressed protein                                                                                                                  |
| <b>1317</b> | 257314_at   | 231   | 0.6 | 1.1 | 1.0 | 334   | 0.9 | 0.8 | 0.5 | AT3G26590 | MATE efflux protein family                                                                                                         |
| <b>1318</b> | 262418_at   | 2950  | 1.0 | 1.0 | 1.0 | 3902  | 1.0 | 0.8 | 0.5 | AT1G50320 | thioredoxin x                                                                                                                      |
| <b>1319</b> | 248507_at   | 394   | 0.9 | 0.8 | 0.6 | 383   | 1.0 | 0.7 | 0.5 | AT5G50420 | expressed protein                                                                                                                  |
| <b>1320</b> | 261815_at   | 318   | 1.1 | 0.9 | 0.7 | 486   | 1.0 | 0.8 | 0.5 | AT1G08320 | bZIP protein                                                                                                                       |
| <b>1321</b> | 265182_at   | 3986  | 1.1 | 1.1 | 1.2 | 4367  | 1.1 | 0.8 | 0.5 | AT1G23740 | oxidoreductase, zinc-binding dehydrogenase family                                                                                  |
| <b>1322</b> | 252116_at   | 3822  | 1.0 | 1.0 | 1.2 | 3413  | 1.1 | 0.9 | 0.5 | AT3G51510 | expressed protein                                                                                                                  |
| <b>1323</b> | 264070_at   | 463   | 1.1 | 1.2 | 1.3 | 701   | 1.0 | 0.7 | 0.5 | AT2G27960 | CDK-subunit 1                                                                                                                      |
| <b>1324</b> | 244936_at   | 2415  | 0.8 | 0.8 | 0.8 | 2437  | 1.2 | 0.8 | 0.5 | ATCG01100 | NADH dehydrogenase subunit 1 (NDHA)                                                                                                |
| <b>1325</b> | 265083_at   | 220   | 1.3 | 1.1 | 1.1 | 585   | 1.0 | 0.9 | 0.5 | AT1G03820 | expressed protein                                                                                                                  |

|             |             |      |     |     |     |      |     |     |     |           |                                              |
|-------------|-------------|------|-----|-----|-----|------|-----|-----|-----|-----------|----------------------------------------------|
| <b>1326</b> | 245383_at   | 685  | 1.1 | 1.3 | 1.5 | 599  | 1.0 | 0.7 | 0.5 | AT4G17810 | SUPERMAN like protein                        |
| <b>1327</b> | 267637_at   | 308  | 0.7 | 0.6 | 0.6 | 241  | 1.5 | 1.0 | 0.5 | AT2G42190 | expressed protein                            |
| <b>1328</b> | 255041_at   | 943  | 1.0 | 1.0 | 1.0 | 1332 | 1.0 | 0.9 | 0.5 | AT4G09620 | expressed protein                            |
| <b>1329</b> | 245952_at   | 582  | 0.8 | 0.9 | 1.2 | 530  | 1.1 | 0.9 | 0.5 | AT5G28500 | expressed protein                            |
| <b>1330</b> | 262451_at   | 325  | 1.0 | 0.9 | 1.0 | 537  | 1.0 | 0.7 | 0.5 | AT1G11130 | leucine rich repeat protein kinase family    |
| <b>1331</b> | 258249_s_at | 697  | 0.8 | 0.8 | 0.7 | 562  | 1.0 | 0.7 | 0.5 | AT3G15820 | phosphatidic acid phosphatase (PAP2)-related |
| <b>1332</b> | 249162_at   | 946  | 0.9 | 0.9 | 1.0 | 1140 | 1.0 | 0.7 | 0.5 | AT5G42765 | expressed protein                            |
| <b>1333</b> | 262342_at   | 748  | 0.9 | 0.9 | 1.0 | 550  | 1.0 | 0.8 | 0.5 | AT1G64150 | expressed protein                            |
| <b>1334</b> | 245859_at   | 461  | 0.9 | 0.7 | 0.7 | 403  | 1.0 | 0.8 | 0.5 | AT5G28290 | protein kinase, putative                     |
| <b>1335</b> | 262247_at   | 1203 | 0.8 | 0.9 | 1.1 | 1482 | 1.0 | 0.9 | 0.5 | AT1G48420 | expressed protein                            |
| <b>1336</b> | 250189_at   | 494  | 0.9 | 0.5 | 0.3 | 337  | 1.1 | 0.9 | 0.5 | AT5G14410 | expressed protein                            |
| <b>1337</b> | 248975_at   | 1271 | 1.0 | 1.3 | 1.8 | 1372 | 1.0 | 0.9 | 0.5 | AT5G45040 | expressed protein                            |
| <b>1338</b> | 245015_at   | 1072 | 0.9 | 0.8 | 0.8 | 1410 | 0.8 | 0.8 | 0.5 | ATCG00490 | ribose 1 (RBCL)                              |
| <b>1339</b> | 253692_at   | 890  | 0.9 | 0.8 | 0.8 | 862  | 0.9 | 0.7 | 0.5 | AT4G29720 | amine oxidase family                         |
| <b>1340</b> | 247692_s_at | 5492 | 1.0 | 0.8 | 1.0 | 8991 | 0.9 | 0.6 | 0.5 | AT5G59690 | histone H4                                   |
| <b>1341</b> | 261090_at   | 155  | 1.0 | 0.8 | 0.9 | 236  | 0.8 | 0.6 | 0.5 | AT1G07560 | leucine rich repeat protein kinase, putative |
| <b>1342</b> | 266331_at   | 1163 | 1.1 | 1.1 | 0.8 | 1270 | 1.0 | 0.8 | 0.5 | AT2G01570 | gibberellin response modulator (RGA1)        |
| <b>1343</b> | 250647_at   | 254  | 1.1 | 1.0 | 0.9 | 312  | 0.9 | 0.8 | 0.5 | AT5G06770 | KH domain/zinc finger protein                |
| <b>1344</b> | 261931_at   | 1288 | 1.0 | 1.1 | 1.1 | 1224 | 1.1 | 0.7 | 0.5 | AT1G22430 | alcohol dehydrogenase (ADH), putative        |
| <b>1345</b> | 247908_at   | 302  | 0.9 | 0.9 | 1.3 | 344  | 0.8 | 0.9 | 0.5 | AT5G57440 | haloacid dehalogenase-like hydrolase family  |
| <b>1346</b> | 252036_at   | 417  | 0.7 | 0.8 | 1.4 | 668  | 1.0 | 0.9 | 0.5 | AT3G52070 | expressed protein                            |
| <b>1347</b> | 267561_at   | 607  | 1.0 | 0.7 | 0.7 | 569  | 1.2 | 0.8 | 0.5 | AT2G45590 | protein kinase family                        |
| <b>1348</b> | 266356_at   | 412  | 0.9 | 0.6 | 0.3 | 304  | 0.9 | 1.0 | 0.5 | AT2G32300 | uclacyanin I                                 |
| <b>1349</b> | 266338_at   | 302  | 0.9 | 0.8 | 0.9 | 359  | 0.9 | 0.8 | 0.5 | AT2G32400 | glutamate receptor family (GLR3.7)(GLR5)     |
| <b>1350</b> | 266588_at   | 4604 | 0.8 | 0.7 | 0.8 | 4324 | 0.9 | 0.7 | 0.5 | AT2G14890 | arabinogalactan-protein (AGP9)               |
| <b>1351</b> | 263386_at   | 233  | 1.0 | 1.3 | 1.1 | 249  | 1.2 | 0.9 | 0.5 | AT2G40150 | expressed protein                            |
| <b>1352</b> | 247853_at   | 2901 | 1.1 | 0.9 | 0.7 | 3111 | 1.0 | 0.9 | 0.5 | AT5G58140 | non phototropic hypocotyl 1-related          |
| <b>1353</b> | 247467_at   | 701  | 1.1 | 1.0 | 0.5 | 571  | 1.1 | 0.8 | 0.5 | AT5G62130 | expressed protein                            |
| <b>1354</b> | 258997_at   | 655  | 0.9 | 1.0 | 0.9 | 634  | 1.1 | 0.8 | 0.5 | AT3G01810 | expressed protein                            |
| <b>1355</b> | 247289_at   | 1830 | 0.9 | 0.8 | 0.9 | 2297 | 0.9 | 0.7 | 0.5 | AT5G64290 | oxoglutarate/malate translocator, putative   |
| <b>1356</b> | 258048_at   | 1042 | 0.9 | 0.8 | 0.9 | 1197 | 1.1 | 0.9 | 0.5 | AT3G16290 | FtsH protease, putative                      |
| <b>1357</b> | 249694_at   | 888  | 1.0 | 1.2 | 1.7 | 1108 | 1.1 | 0.9 | 0.5 | AT5G35790 | glucose-6-phosphate dehydrogenase            |
| <b>1358</b> | 265416_at   | 1105 | 0.8 | 1.0 | 1.3 | 1125 | 1.1 | 0.8 | 0.5 | AT2G37120 | expressed protein                            |
| <b>1359</b> | 250751_at   | 214  | 1.1 | 0.8 | 0.8 | 191  | 0.9 | 0.7 | 0.5 | AT5G05890 | glucuronosyl transferase-related protein     |
| <b>1360</b> | 258585_at   | 594  | 1.0 | 0.9 | 0.9 | 765  | 1.0 | 0.8 | 0.5 | AT3G04340 | expressed protein                            |
| <b>1361</b> | 246308_at   | 2669 | 1.1 | 1.0 | 1.1 | 2984 | 1.0 | 0.7 | 0.5 | AT3G51820 | chlorophyll synthetase, putative             |
| <b>1362</b> | 247936_at   | 1560 | 1.2 | 1.0 | 0.9 | 1904 | 1.1 | 0.9 | 0.5 | AT5G57030 | lycopene epsilon cyclase                     |

|             |           |       |     |     |     |       |     |     |     |           |                                                                                                |
|-------------|-----------|-------|-----|-----|-----|-------|-----|-----|-----|-----------|------------------------------------------------------------------------------------------------|
| <b>1363</b> | 254982_at | 260   | 0.9 | 0.9 | 1.0 | 247   | 1.0 | 1.0 | 0.5 | AT4G10470 | expressed protein                                                                              |
| <b>1364</b> | 259568_at | 267   | 0.8 | 1.0 | 0.8 | 377   | 1.0 | 0.8 | 0.5 | AT1G20490 | 4-coumarate:CoA ligase 1 (4-coumaroyl-CoA synthase 1) (4CL1) family                            |
| <b>1365</b> | 260106_at | 1253  | 0.9 | 0.8 | 1.0 | 1133  | 1.1 | 0.9 | 0.5 | AT1G35420 | expressed protein                                                                              |
| <b>1366</b> | 258355_at | 511   | 0.8 | 0.9 | 0.9 | 522   | 1.0 | 0.9 | 0.5 | AT3G14330 | pentatricopeptide (PPR) repeat-containing protein                                              |
| <b>1367</b> | 261873_at | 186   | 0.9 | 0.9 | 1.1 | 248   | 1.1 | 0.8 | 0.5 | AT1G11350 | serine/threonine kinase -related                                                               |
| <b>1368</b> | 249331_at | 1333  | 1.3 | 1.1 | 1.2 | 1515  | 1.0 | 0.8 | 0.5 | AT5G40950 | 50S ribosomal protein L27, chloroplast precursor (CL27)                                        |
| <b>1369</b> | 251906_at | 409   | 0.7 | 0.6 | 0.7 | 490   | 1.0 | 0.7 | 0.5 | AT3G53720 | cation/hydrogen exchanger, putative (CHX20)                                                    |
| <b>1370</b> | 259523_at | 962   | 0.9 | 0.8 | 0.6 | 716   | 0.9 | 0.8 | 0.5 | AT1G12500 | phosphate translocator-related                                                                 |
| <b>1371</b> | 254137_at | 1739  | 0.9 | 0.9 | 1.0 | 2081  | 0.9 | 0.8 | 0.5 | AT4G24930 | thylakoid lumenal 17.9 kDa protein, chloroplast precursor                                      |
| <b>1372</b> | 250764_at | 910   | 1.0 | 1.0 | 1.2 | 1153  | 0.9 | 0.7 | 0.5 | AT5G05960 | protease inhibitor/seed storage/lipid transfer protein (LTP) family                            |
| <b>1373</b> | 256728_at | 1752  | 0.9 | 0.9 | 1.2 | 2064  | 1.0 | 0.7 | 0.5 | AT3G25660 | glutamyl-tRNA amidotransferase subunit A -related                                              |
| <b>1374</b> | 250220_at | 531   | 1.0 | 1.1 | 1.1 | 760   | 1.1 | 0.7 | 0.5 | AT5G14210 | leucine-rich repeat transmembrane protein kinase, putative                                     |
| <b>1375</b> | 258432_at | 1480  | 0.9 | 0.7 | 0.5 | 1741  | 0.9 | 0.9 | 0.5 | AT3G16570 | expressed protein                                                                              |
| <b>1376</b> | 266808_at | 591   | 0.9 | 0.8 | 0.7 | 774   | 0.9 | 0.6 | 0.5 | AT2G29995 | expressed protein                                                                              |
| <b>1377</b> | 259131_at | 2477  | 0.8 | 0.9 | 1.1 | 2721  | 1.0 | 0.7 | 0.5 | AT3G02180 | expressed protein                                                                              |
| <b>1378</b> | 255826_at | 2163  | 1.0 | 0.9 | 1.2 | 1994  | 1.0 | 0.8 | 0.5 | AT2G40490 | uroporphyrinogen decarboxylase (UPD), putative                                                 |
| <b>1379</b> | 264372_at | 3472  | 1.1 | 1.0 | 0.9 | 6418  | 1.1 | 0.9 | 0.5 | AT1G11840 | glyoxalase I, putative (lactoylglutathione lyase)                                              |
| <b>1380</b> | 259358_at | 295   | 0.9 | 0.9 | 1.0 | 333   | 1.2 | 0.8 | 0.5 | AT1G13250 | glycosyltransferase family 8                                                                   |
| <b>1381</b> | 265066_at | 6030  | 1.0 | 0.8 | 0.6 | 3089  | 0.9 | 0.6 | 0.5 | AT1G03870 | fasciclin-like arabinogalactan-protein (FLA9)                                                  |
| <b>1382</b> | 264954_at | 1105  | 1.0 | 0.9 | 1.2 | 846   | 1.0 | 0.8 | 0.5 | AT1G77060 | carboxyphosphoenolpyruvate mutase -related                                                     |
| <b>1383</b> | 262575_at | 472   | 0.8 | 0.9 | 0.7 | 713   | 1.1 | 0.7 | 0.5 | AT1G15210 | ABC transporter family protein                                                                 |
| <b>1384</b> | 267116_at | 531   | 1.0 | 0.9 | 0.7 | 562   | 1.0 | 0.8 | 0.5 | AT2G32560 | F-box protein family                                                                           |
| <b>1385</b> | 265305_at | 265   | 1.1 | 1.0 | 0.9 | 512   | 1.1 | 0.9 | 0.5 | AT2G20340 | tyrosine decarboxylase -related                                                                |
| <b>1386</b> | 245011_at | 1538  | 0.9 | 0.8 | 0.7 | 1627  | 0.9 | 0.7 | 0.5 | ATCG00430 | NADH dehydrogenase subunit K (PSBG)                                                            |
| <b>1387</b> | 253331_at | 515   | 0.8 | 0.8 | 0.8 | 745   | 1.0 | 0.8 | 0.5 | AT4G33490 | nucellin protein, putative                                                                     |
| <b>1388</b> | 266018_at | 2671  | 0.8 | 0.9 | 1.0 | 2523  | 1.0 | 0.8 | 0.5 | AT2G18710 | pre protein translocase SECYprotein -related                                                   |
| <b>1389</b> | 263496_at | 371   | 0.9 | 0.8 | 0.9 | 402   | 1.0 | 0.8 | 0.5 | AT2G42570 | expressed protein                                                                              |
| <b>1390</b> | 248669_at | 548   | 0.8 | 0.7 | 0.7 | 577   | 1.1 | 1.2 | 0.5 | AT5G48730 | pentatricopeptide (PPR) repeat-containing protein                                              |
| <b>1391</b> | 251785_at | 1138  | 0.9 | 0.6 | 0.4 | 810   | 1.0 | 0.8 | 0.5 | AT3G55130 | ABC transporter family protein                                                                 |
| <b>1392</b> | 260190_at | 367   | 1.2 | 0.8 | 0.8 | 395   | 1.1 | 0.9 | 0.5 | AT1G67560 | lipoxygenase family                                                                            |
| <b>1393</b> | 262954_at | 4660  | 1.1 | 1.1 | 1.2 | 4865  | 1.0 | 0.9 | 0.5 | AT1G54500 | rubredoxin -related                                                                            |
| <b>1394</b> | 248899_at | 492   | 1.0 | 0.9 | 1.2 | 477   | 1.1 | 0.7 | 0.5 | AT5G46390 | Photosystem II D1 protein processing enzyme I (C-terminal processing protease),putative (ctpA) |
| <b>1395</b> | 255720_at | 14851 | 1.1 | 1.0 | 1.3 | 16589 | 1.0 | 0.8 | 0.5 | AT1G32060 | phosphoribulokinase precursor                                                                  |
| <b>1396</b> | 244983_at | 3884  | 0.8 | 0.8 | 1.0 | 4282  | 1.0 | 0.6 | 0.5 | ATCG00790 | ribosomal protein L16 (RPL16)                                                                  |

|             |           |       |     |     |     |       |     |     |     |           |                                                                                                                                                   |
|-------------|-----------|-------|-----|-----|-----|-------|-----|-----|-----|-----------|---------------------------------------------------------------------------------------------------------------------------------------------------|
| <b>1397</b> | 263136_at | 491   | 1.2 | 0.8 | 0.9 | 511   | 0.9 | 0.7 | 0.5 | AT1G78580 | alpha,alpha-trehalose-phosphate synthase, UDP-forming (trehalose-6-phosphate synthase/UDP-glucose-glucosephosphate glucosyltransferase), putative |
| <b>1398</b> | 255488_at | 213   | 0.9 | 1.0 | 0.9 | 567   | 1.1 | 0.8 | 0.5 | AT4G02630 | protein kinase family                                                                                                                             |
| <b>1399</b> | 263471_at | 884   | 0.8 | 1.0 | 1.1 | 997   | 1.2 | 1.1 | 0.5 | AT2G31890 | expressed protein                                                                                                                                 |
| <b>1400</b> | 259914_at | 401   | 0.8 | 0.8 | 0.7 | 381   | 1.0 | 0.8 | 0.5 | AT1G72640 | expressed protein                                                                                                                                 |
| <b>1401</b> | 246268_at | 2511  | 1.0 | 1.0 | 1.1 | 3206  | 1.0 | 0.8 | 0.5 | AT1G31800 | cytochrome P450, putative                                                                                                                         |
| <b>1402</b> | 254659_at | 2033  | 0.8 | 0.8 | 1.0 | 2179  | 1.0 | 0.9 | 0.5 | AT4G18240 | starch synthase-related protein                                                                                                                   |
| <b>1403</b> | 258736_at | 1084  | 1.0 | 0.7 | 0.6 | 419   | 0.9 | 0.8 | 0.5 | AT3G05900 | expressed protein                                                                                                                                 |
| <b>1404</b> | 264673_at | 707   | 0.7 | 0.8 | 1.0 | 1100  | 1.1 | 0.9 | 0.5 | AT1G09795 | AtATP-PRT2 mRNA for ATP phosphoribosyl transferase                                                                                                |
| <b>1405</b> | 263442_at | 587   | 1.1 | 1.2 | 1.4 | 637   | 1.0 | 0.8 | 0.5 | AT2G28605 | expressed protein                                                                                                                                 |
| <b>1406</b> | 264071_at | 453   | 1.0 | 1.0 | 1.1 | 534   | 1.0 | 0.6 | 0.5 | AT2G27920 | serine carboxypeptidase -related                                                                                                                  |
| <b>1407</b> | 258782_at | 135   | 0.8 | 0.8 | 1.5 | 167   | 1.0 | 0.9 | 0.5 | AT3G11750 | dihydroneopterin aldolase -related                                                                                                                |
| <b>1408</b> | 267178_at | 1222  | 0.9 | 0.8 | 0.9 | 707   | 1.0 | 0.6 | 0.5 | AT2G37750 | expressed protein                                                                                                                                 |
| <b>1409</b> | 255561_at | 764   | 0.8 | 0.9 | 0.8 | 1004  | 1.0 | 0.9 | 0.5 | AT4G02050 | sugar transporter, putative                                                                                                                       |
| <b>1410</b> | 245789_at | 592   | 0.8 | 0.7 | 0.7 | 595   | 0.9 | 1.0 | 0.5 | AT1G32090 | ERD4 protein-related                                                                                                                              |
| <b>1411</b> | 260009_at | 307   | 0.9 | 0.9 | 1.0 | 448   | 1.1 | 0.7 | 0.5 | AT1G67950 | RRM-containing protein                                                                                                                            |
| <b>1412</b> | 251935_at | 1368  | 0.9 | 0.9 | 1.1 | 2025  | 1.0 | 0.9 | 0.5 | AT3G54090 | pfkB type carbohydrate kinase protein family                                                                                                      |
| <b>1413</b> | 262151_at | 1243  | 0.8 | 0.9 | 1.1 | 1105  | 1.1 | 0.8 | 0.5 | AT1G52510 | hydrolase, alpha/beta fold family                                                                                                                 |
| <b>1414</b> | 253337_at | 949   | 0.9 | 0.8 | 0.9 | 1090  | 1.0 | 0.8 | 0.5 | AT4G33470 | expressed protein                                                                                                                                 |
| <b>1415</b> | 263000_at | 978   | 0.9 | 1.0 | 1.2 | 1092  | 1.1 | 0.8 | 0.5 | AT1G54350 | ABC transporter family protein                                                                                                                    |
| <b>1416</b> | 264342_at | 471   | 0.9 | 0.8 | 1.0 | 338   | 0.8 | 0.6 | 0.5 | AT1G12080 | expressed protein                                                                                                                                 |
| <b>1417</b> | 258393_at | 2415  | 0.9 | 0.8 | 0.8 | 2142  | 1.1 | 0.8 | 0.5 | AT3G15480 | expressed protein                                                                                                                                 |
| <b>1418</b> | 246736_at | 1322  | 0.8 | 0.9 | 1.1 | 1673  | 1.0 | 0.7 | 0.5 | AT5G27560 | expressed protein                                                                                                                                 |
| <b>1419</b> | 263550_at | 617   | 0.9 | 1.0 | 1.1 | 651   | 1.0 | 0.9 | 0.5 | AT2G17033 | pentatricopeptide (PPR) repeat-containing protein                                                                                                 |
| <b>1420</b> | 256524_at | 7621  | 0.9 | 0.9 | 0.9 | 10183 | 0.9 | 0.8 | 0.5 | AT1G66200 | glutamine synthetase -related                                                                                                                     |
| <b>1421</b> | 248596_at | 185   | 3.5 | 3.4 | 0.7 | 495   | 1.1 | 1.4 | 0.5 | AT5G49330 | myb family transcription factor                                                                                                                   |
| <b>1422</b> | 249810_at | 2670  | 1.1 | 1.1 | 1.0 | 3173  | 1.0 | 0.9 | 0.5 | AT5G23920 | expressed protein                                                                                                                                 |
| <b>1423</b> | 253650_at | 996   | 0.8 | 0.8 | 0.9 | 1295  | 0.9 | 0.7 | 0.5 | AT4G30020 | subtilisin-like serine protease                                                                                                                   |
| <b>1424</b> | 266322_at | 635   | 0.7 | 0.5 | 0.4 | 597   | 1.1 | 0.9 | 0.5 | AT2G46690 | auxin-induced (indole-3-acetic acid induced) protein family                                                                                       |
| <b>1425</b> | 250190_at | 7850  | 1.1 | 1.0 | 1.0 | 8161  | 1.0 | 0.8 | 0.5 | AT5G14320 | 30S ribosomal protein S13, chloroplast precursor (CS13)                                                                                           |
| <b>1426</b> | 254234_at | 7445  | 0.8 | 0.8 | 0.8 | 8488  | 1.1 | 0.7 | 0.5 | AT4G23680 | major latex protein (MLP)-related                                                                                                                 |
| <b>1427</b> | 266655_at | 248   | 1.2 | 1.0 | 1.1 | 184   | 1.2 | 0.5 | 0.5 | AT2G25880 | serine/threonine protein kinase, putative                                                                                                         |
| <b>1428</b> | 263676_at | 13259 | 1.0 | 1.0 | 1.1 | 15543 | 0.9 | 0.7 | 0.5 | AT1G09340 | RNA-binding protein -related                                                                                                                      |
| <b>1429</b> | 264698_at | 754   | 1.0 | 0.9 | 1.0 | 640   | 1.1 | 0.9 | 0.5 | AT1G70200 | RRM-containing protein                                                                                                                            |
| <b>1430</b> | 250584_at | 245   | 1.1 | 1.0 | 1.1 | 295   | 1.0 | 0.6 | 0.5 | AT5G07590 | WD-40 repeat protein family                                                                                                                       |
| <b>1431</b> | 251305_at | 12238 | 1.1 | 1.0 | 1.1 | 16038 | 0.9 | 0.7 | 0.5 | AT3G62030 | peptidylprolyl isomerase ROC4                                                                                                                     |
| <b>1432</b> | 265415_at | 8078  | 1.0 | 0.9 | 1.0 | 8448  | 1.0 | 0.8 | 0.5 | AT2G20890 | expressed protein                                                                                                                                 |



|      |           |       |     |     |     |       |     |     |     |           |                                                            |
|------|-----------|-------|-----|-----|-----|-------|-----|-----|-----|-----------|------------------------------------------------------------|
| 1433 | 263420_at | 1579  | 1.2 | 1.0 | 1.1 | 2042  | 0.8 | 1.0 | 0.5 | AT2G17240 | expressed protein                                          |
| 1434 | 266254_at | 944   | 0.9 | 0.8 | 0.7 | 1058  | 1.0 | 0.8 | 0.5 | AT2G27810 | membrane transporter -related                              |
| 1435 | 264613_at | 1356  | 0.9 | 0.9 | 0.9 | 1260  | 1.0 | 1.0 | 0.5 | AT1G04640 | lipoyltransferase                                          |
| 1436 | 258025_at | 770   | 1.0 | 0.9 | 1.2 | 689   | 1.0 | 0.7 | 0.5 | AT3G19480 | D-3-phosphoglycerate dehydrogenase (3-PGDH), putative      |
| 1437 | 264164_at | 640   | 0.9 | 0.9 | 0.7 | 807   | 0.9 | 0.9 | 0.5 | AT1G65295 | expressed protein                                          |
| 1438 | 263319_at | 224   | 0.9 | 0.6 | 0.6 | 184   | 1.1 | 0.7 | 0.5 | AT2G47160 | anion exchange protein family                              |
| 1439 | 246550_at | 8922  | 0.7 | 0.7 | 0.8 | 5649  | 0.9 | 0.6 | 0.5 | AT5G14920 | expressed protein                                          |
| 1440 | 257773_at | 1534  | 1.0 | 0.9 | 1.0 | 1522  | 1.0 | 0.8 | 0.5 | AT3G29185 | expressed protein                                          |
| 1441 | 255572_at | 4795  | 1.0 | 0.8 | 0.9 | 4133  | 0.9 | 0.8 | 0.5 | AT4G01050 | proline-rich protein family                                |
| 1442 | 267580_at | 286   | 0.9 | 0.7 | 0.6 | 182   | 0.8 | 0.8 | 0.5 | AT2G41990 | expressed protein                                          |
| 1443 | 266929_at | 247   | 0.9 | 0.8 | 1.0 | 355   | 0.9 | 0.9 | 0.5 | AT2G45850 | AT-hook DNA-binding protein -related                       |
| 1444 | 261895_at | 1041  | 0.5 | 0.7 | 0.9 | 1210  | 1.0 | 0.7 | 0.5 | AT1G80830 | NRAMP metal ion transporter 1 (NRAMP1)                     |
| 1445 | 246294_at | 7387  | 1.0 | 0.9 | 1.2 | 7835  | 0.9 | 0.7 | 0.5 | AT3G56910 | ribosomal protein, chloroplast                             |
| 1446 | 247034_at | 1285  | 1.2 | 1.2 | 1.1 | 1303  | 0.9 | 0.8 | 0.5 | AT5G67260 | cyclin family                                              |
| 1447 | 262168_at | 6593  | 1.1 | 1.1 | 1.2 | 6321  | 1.0 | 0.8 | 0.5 | AT1G74730 | expressed protein                                          |
| 1448 | 248338_at | 3513  | 0.9 | 0.9 | 0.9 | 3002  | 1.0 | 0.8 | 0.5 | AT5G52440 | HCF106 (gb AAD32652.1)                                     |
| 1449 | 265844_at | 872   | 0.8 | 0.7 | 0.6 | 884   | 0.9 | 1.0 | 0.5 | AT2G35620 | leucine-rich repeat transmembrane protein kinase, putative |
| 1450 | 266551_at | 2066  | 0.9 | 0.7 | 0.8 | 1393  | 1.0 | 0.9 | 0.5 | AT2G35260 | expressed protein                                          |
| 1451 | 247072_at | 437   | 0.7 | 1.0 | 1.2 | 467   | 1.0 | 0.8 | 0.5 | AT5G66490 | expressed protein                                          |
| 1452 | 251701_at | 1118  | 0.9 | 0.9 | 1.1 | 903   | 1.1 | 0.8 | 0.5 | AT3G56650 | thylakoid lumenal 20 kDa protein                           |
| 1453 | 255623_at | 5479  | 0.9 | 0.9 | 1.1 | 6354  | 1.0 | 0.7 | 0.5 | AT4G01310 | ribosomal protein L5p family                               |
| 1454 | 251120_at | 5850  | 1.0 | 0.9 | 1.1 | 6179  | 1.0 | 0.8 | 0.5 | AT3G63490 | ribosomal protein L1p family                               |
| 1455 | 266207_at | 3185  | 1.1 | 1.0 | 1.1 | 3470  | 1.0 | 0.9 | 0.5 | AT2G27680 | aldo/keto reductase family                                 |
| 1456 | 253548_at | 903   | 0.9 | 1.2 | 1.2 | 728   | 1.1 | 0.8 | 0.5 | AT4G30993 | expressed protein                                          |
| 1457 | 261119_at | 7230  | 1.1 | 1.0 | 1.2 | 7897  | 1.1 | 0.8 | 0.5 | AT1G75350 | chloroplast 50S ribosomal protein L31 -related             |
| 1458 | 245635_at | 175   | 1.1 | 0.7 | 0.8 | 248   | 1.1 | 0.9 | 0.5 | AT1G25250 | zinc finger protein ID1 -related                           |
| 1459 | 265990_at | 422   | 0.9 | 1.1 | 1.1 | 729   | 1.0 | 1.0 | 0.5 | AT2G24280 | prolylcarboxypeptidase -related                            |
| 1460 | 260254_at | 414   | 0.9 | 1.0 | 1.0 | 720   | 1.1 | 0.7 | 0.5 | AT1G74210 | glycerophosphodiester phosphodiesterase -related           |
| 1461 | 245183_at | 276   | 0.9 | 0.6 | 0.7 | 301   | 0.8 | 0.9 | 0.5 | AT5G12440 | expressed protein                                          |
| 1462 | 267092_at | 1586  | 0.7 | 0.7 | 0.6 | 1603  | 0.9 | 0.7 | 0.5 | AT2G38120 | amino acid permease, putative (AUX1)                       |
| 1463 | 259625_at | 18644 | 1.0 | 1.0 | 1.1 | 21442 | 1.0 | 0.7 | 0.5 | AT1G42970 | glyceraldehyde-3-phosphate dehydrogenase                   |
| 1464 | 254388_at | 5461  | 1.1 | 1.0 | 0.9 | 5214  | 1.0 | 0.8 | 0.5 | AT4G21860 | expressed protein                                          |
| 1465 | 251983_at | 101   | 1.0 | 0.8 | 1.1 | 181   | 1.1 | 0.6 | 0.5 | AT3G53210 | nodulin MtN21 family protein                               |
| 1466 | 258674_at | 4790  | 1.0 | 1.0 | 1.2 | 5711  | 1.1 | 0.8 | 0.5 | AT3G08740 | elongation factor P (EF-P) -related                        |
| 1467 | 254815_at | 4192  | 1.0 | 0.8 | 0.8 | 2785  | 0.9 | 0.8 | 0.5 | AT4G12420 | pectinesterase (pectin methylesterase) family              |
| 1468 | 262572_at | 2157  | 1.1 | 1.0 | 1.0 | 3049  | 0.9 | 0.7 | 0.5 | AT1G15140 | oxidoreductase NAD-binding domain-containing protein       |
| 1469 | 266516_at | 92    | 1.3 | 1.4 | 1.8 | 314   | 1.0 | 0.6 | 0.5 | AT2G47880 | glutaredoxin protein family                                |

|      |             |       |     |     |     |       |     |     |     |           |                                                                                   |
|------|-------------|-------|-----|-----|-----|-------|-----|-----|-----|-----------|-----------------------------------------------------------------------------------|
| 1470 | 250434_at   | 708   | 0.8 | 0.8 | 0.7 | 1217  | 0.9 | 0.7 | 0.5 | AT5G10390 | histone H3                                                                        |
| 1471 | 249900_at   | 2110  | 0.9 | 0.7 | 0.8 | 2137  | 1.0 | 0.9 | 0.5 | AT5G22640 | expressed protein                                                                 |
| 1472 | 253283_at   | 1048  | 0.9 | 0.9 | 1.0 | 1138  | 1.0 | 0.9 | 0.5 | AT4G34090 | expressed protein                                                                 |
| 1473 | 261622_at   | 1150  | 0.9 | 0.9 | 0.7 | 1354  | 0.9 | 1.0 | 0.5 | AT1G01970 | pentatricopeptide (PPR) repeat-containing protein                                 |
| 1474 | 249216_at   | 491   | 0.9 | 0.7 | 0.9 | 391   | 1.2 | 0.9 | 0.5 | AT5G42240 | serine carboxypeptidase -related                                                  |
| 1475 | 257777_x_at | 69    | 1.2 | 1.1 | 1.8 | 133   | 0.7 | 0.8 | 0.5 | AT3G29210 | hypothetical protein common family                                                |
| 1476 | 255798_at   | 1079  | 1.1 | 1.0 | 1.1 | 1221  | 0.9 | 0.9 | 0.5 | AT2G33255 | haloacid dehalogenase-like hydrolase family                                       |
| 1477 | 265342_at   | 365   | 0.7 | 0.7 | 1.0 | 225   | 1.4 | 0.5 | 0.5 | AT2G18300 | bHLH064 putative bHLH transcription factor                                        |
| 1478 | 264920_at   | 891   | 1.0 | 1.2 | 1.5 | 1081  | 1.1 | 0.9 | 0.5 | AT1G60550 | naphthoate synthase (DHNA synthetase), putative                                   |
| 1479 | 252463_at   | 8461  | 1.0 | 1.0 | 1.2 | 7874  | 0.9 | 0.8 | 0.5 | AT3G47070 | expressed protein                                                                 |
| 1480 | 254370_at   | 1296  | 0.9 | 0.6 | 0.4 | 793   | 1.2 | 0.7 | 0.5 | AT4G21750 | L1 specific homeobox gene ATML1/ovule-specific homeobox protein A20 (ATML1)       |
| 1481 | 261049_at   | 1060  | 0.8 | 0.7 | 0.7 | 972   | 1.0 | 0.8 | 0.5 | AT1G01430 | expressed protein                                                                 |
| 1482 | 254928_at   | 286   | 0.8 | 0.7 | 0.9 | 387   | 1.0 | 0.9 | 0.5 | AT4G11410 | short-chain dehydrogenase/reductase family protein                                |
| 1483 | 248026_at   | 1283  | 1.0 | 0.8 | 0.8 | 1398  | 1.0 | 0.9 | 0.5 | AT5G55710 | expressed protein                                                                 |
| 1484 | 249554_at   | 491   | 0.9 | 0.9 | 0.9 | 442   | 1.0 | 0.9 | 0.5 | AT5G38290 | CRS2 -related protein                                                             |
| 1485 | 263449_at   | 2370  | 1.0 | 0.9 | 0.9 | 2514  | 1.0 | 0.8 | 0.5 | AT2G31670 | expressed protein                                                                 |
| 1486 | 257162_s_at | 151   | 1.1 | 0.9 | 0.4 | 367   | 1.0 | 0.8 | 0.5 | AT3G24290 | ammonium transporter -related                                                     |
| 1487 | 249978_at   | 599   | 0.9 | 0.7 | 0.8 | 476   | 1.1 | 0.9 | 0.5 | AT5G18850 | expressed protein                                                                 |
| 1488 | 249422_at   | 634   | 0.8 | 0.5 | 0.6 | 485   | 0.9 | 0.8 | 0.5 | AT5G39760 | expressed protein                                                                 |
| 1489 | 249002_at   | 855   | 0.8 | 0.7 | 1.0 | 659   | 1.2 | 1.0 | 0.5 | AT5G44520 | expressed protein                                                                 |
| 1490 | 252562_s_at | 199   | 0.6 | 0.4 | 0.6 | 257   | 1.0 | 0.8 | 0.5 | AT3G45930 | histone H4                                                                        |
| 1491 | 254535_at   | 914   | 0.8 | 0.9 | 1.1 | 1000  | 1.0 | 0.8 | 0.5 | AT4G19710 | aspartate kinase/homoserine dehydrogenase (ak-hsdh) bifunctional enzyme, putative |
| 1492 | 251920_at   | 625   | 1.0 | 0.9 | 1.0 | 853   | 1.0 | 0.7 | 0.5 | AT3G53900 | uracil phosphoribosyltransferase-related protein                                  |
| 1493 | 261206_at   | 2793  | 1.0 | 0.9 | 1.0 | 2679  | 1.0 | 0.8 | 0.5 | AT1G12800 | heat shock factor protein hsf8 -related                                           |
| 1494 | 258755_at   | 1746  | 1.0 | 1.0 | 1.1 | 1861  | 1.0 | 1.0 | 0.5 | AT3G11950 | UbiA prenyltransferase family                                                     |
| 1495 | 262680_at   | 162   | 0.9 | 0.6 | 0.5 | 232   | 1.1 | 0.7 | 0.5 | AT1G75880 | family II extracellular lipase 1 (EXL1)                                           |
| 1496 | 265966_at   | 10906 | 1.1 | 1.0 | 1.0 | 11274 | 1.0 | 0.9 | 0.5 | AT2G37220 | 29 kDa ribonucleoprotein, chloroplast (RNA-binding protein cp29), putative        |
| 1497 | 259981_at   | 2523  | 0.9 | 1.1 | 1.2 | 2223  | 1.0 | 0.8 | 0.5 | AT1G76450 | oxygen-evolving complex-23 related protein                                        |
| 1498 | 254280_at   | 357   | 0.8 | 0.9 | 1.0 | 391   | 1.0 | 0.9 | 0.5 | AT4G22756 | C-4 methyl sterol oxidase, putative                                               |
| 1499 | 245845_at   | 596   | 1.0 | 0.8 | 0.9 | 432   | 1.0 | 0.9 | 0.5 | AT1G26150 | protein kinase family                                                             |
| 1500 | 254034_at   | 1794  | 0.9 | 0.6 | 0.5 | 1663  | 1.0 | 0.9 | 0.5 | AT4G25960 | multidrug resistance P-glycoprotein, putative                                     |
| 1501 | 264360_at   | 1255  | 0.9 | 0.8 | 1.1 | 1664  | 1.1 | 0.9 | 0.5 | AT1G03310 | glycoside hydrolase family 13                                                     |
| 1502 | 254670_at   | 931   | 1.4 | 1.0 | 0.5 | 524   | 0.9 | 0.9 | 0.5 | AT4G18390 | TCP family transcription factor, putative                                         |
| 1503 | 257236_at   | 654   | 1.0 | 0.8 | 0.8 | 617   | 1.0 | 0.8 | 0.5 | AT3G15095 | hypothetical protein                                                              |
| 1504 | 261273_at   | 482   | 0.8 | 1.0 | 1.0 | 619   | 1.2 | 1.0 | 0.5 | AT1G26650 | expressed protein                                                                 |

|             |           |       |     |     |     |       |     |     |     |           |                                                                                                             |
|-------------|-----------|-------|-----|-----|-----|-------|-----|-----|-----|-----------|-------------------------------------------------------------------------------------------------------------|
| <b>1505</b> | 261055_at | 1297  | 0.8 | 0.6 | 0.7 | 1622  | 0.9 | 0.9 | 0.5 | AT1G01300 | chloroplast nucleoid DNA binding protein -related                                                           |
| <b>1506</b> | 258802_at | 471   | 1.1 | 0.9 | 0.9 | 576   | 1.0 | 0.8 | 0.5 | AT3G04650 | expressed protein                                                                                           |
| <b>1507</b> | 267377_at | 3459  | 1.1 | 0.7 | 0.5 | 2754  | 1.0 | 0.8 | 0.5 | AT2G26250 | beta-ketoacyl-CoA synthase family (FIDDLEHEAD) (FDH)                                                        |
| <b>1508</b> | 265048_at | 417   | 0.9 | 0.9 | 0.9 | 426   | 1.0 | 0.5 | 0.5 | AT1G52050 | jacalin lectin family                                                                                       |
| <b>1509</b> | 267630_at | 1177  | 1.0 | 0.8 | 1.0 | 1427  | 0.9 | 0.8 | 0.5 | AT2G42130 | expressed protein                                                                                           |
| <b>1510</b> | 245151_at | 226   | 0.9 | 0.8 | 0.7 | 162   | 1.1 | 0.7 | 0.5 | AT2G47550 | pectinesterase family                                                                                       |
| <b>1511</b> | 249090_at | 248   | 1.0 | 0.7 | 0.9 | 297   | 0.8 | 0.6 | 0.5 | AT5G43745 | expressed protein                                                                                           |
| <b>1512</b> | 262648_at | 871   | 0.9 | 1.0 | 1.3 | 910   | 1.1 | 0.9 | 0.5 | AT1G14030 | ribulose-1,5 bisphosphate carboxylase oxygenase large subunit N-methyltransferase, putative                 |
| <b>1513</b> | 253049_at | 3058  | 0.9 | 0.6 | 0.6 | 2381  | 1.0 | 0.9 | 0.5 | AT4G37300 | expressed protein                                                                                           |
| <b>1514</b> | 255331_at | 2489  | 0.9 | 1.0 | 1.2 | 1805  | 1.1 | 1.1 | 0.5 | AT4G04330 | expressed protein                                                                                           |
| <b>1515</b> | 257966_at | 1535  | 1.4 | 1.6 | 1.5 | 1470  | 1.1 | 1.0 | 0.5 | AT3G19800 | expressed protein                                                                                           |
| <b>1516</b> | 248903_at | 4634  | 0.9 | 0.9 | 0.7 | 5782  | 0.9 | 0.7 | 0.5 | AT5G46290 | 3-oxoacyl-(acyl-carrier-protein) synthase I precursor (beta-ketoacyl-acyl synthase I) (KAS I) (sp P52410)   |
| <b>1517</b> | 249230_at | 1555  | 1.3 | 1.3 | 1.4 | 1083  | 1.0 | 0.8 | 0.5 | AT5G42070 | expressed protein                                                                                           |
| <b>1518</b> | 251961_at | 601   | 0.9 | 0.9 | 0.8 | 713   | 1.3 | 1.0 | 0.5 | AT3G53620 | inorganic pyrophosphatase -related protein                                                                  |
| <b>1519</b> | 253386_at | 4119  | 1.0 | 1.0 | 1.0 | 7823  | 1.0 | 0.9 | 0.5 | AT4G33030 | UDP-sulfoquinovose synthase (sulfite:UDP-glucose sulfotransferase) (sulfolipid biosynthesis protein) (SQD1) |
| <b>1520</b> | 254642_at | 926   | 1.0 | 0.9 | 0.9 | 884   | 1.1 | 0.8 | 0.5 | AT4G18810 | expressed protein                                                                                           |
| <b>1521</b> | 247110_at | 184   | 0.7 | 0.8 | 0.7 | 131   | 0.8 | 0.7 | 0.5 | AT5G65830 | leucine rich repeat protein family                                                                          |
| <b>1522</b> | 257909_at | 930   | 1.1 | 1.2 | 1.2 | 1167  | 1.0 | 0.8 | 0.5 | AT3G25480 | rhodanese-like domain protein                                                                               |
| <b>1523</b> | 247094_at | 253   | 0.9 | 0.9 | 1.0 | 243   | 0.9 | 0.7 | 0.5 | AT5G66280 | GDP-D-mannose 4,6-dehydratase, putative                                                                     |
| <b>1524</b> | 256514_at | 264   | 1.3 | 1.1 | 1.1 | 258   | 1.3 | 1.0 | 0.5 | AT1G66130 | oxidoreductase -related                                                                                     |
| <b>1525</b> | 250203_at | 1224  | 0.8 | 0.8 | 1.0 | 1375  | 1.0 | 0.8 | 0.5 | AT5G13980 | glycosyl hydrolase family 38 (alpha-mannosidase)                                                            |
| <b>1526</b> | 260083_at | 601   | 0.9 | 0.8 | 0.7 | 660   | 0.8 | 0.6 | 0.5 | AT1G63220 | C2 domain-containing protein                                                                                |
| <b>1527</b> | 261218_at | 13166 | 0.9 | 0.9 | 1.0 | 12327 | 0.9 | 0.8 | 0.5 | AT1G20020 | ferredoxin--NADP(+) reductase (adrenodoxin reductase), putative                                             |
| <b>1528</b> | 259160_at | 460   | 1.0 | 0.8 | 0.7 | 377   | 1.2 | 1.1 | 0.5 | AT3G05410 | expressed protein                                                                                           |
| <b>1529</b> | 266856_at | 1746  | 0.9 | 0.8 | 0.7 | 1885  | 1.0 | 0.8 | 0.5 | AT2G26910 | ABC transporter family protein                                                                              |
| <b>1530</b> | 264348_at | 2645  | 0.6 | 0.5 | 0.5 | 3724  | 0.9 | 0.7 | 0.5 | AT1G12110 | putative NPK1-related protein kinase 2                                                                      |
| <b>1531</b> | 261363_at | 1514  | 1.1 | 0.9 | 0.7 | 1821  | 1.0 | 0.7 | 0.5 | AT1G41830 | pectinesterase (pectin methylesterase) -related                                                             |
| <b>1532</b> | 265795_at | 1981  | 0.9 | 0.9 | 1.0 | 1833  | 1.0 | 0.9 | 0.5 | AT2G35780 | serine carboxypeptidase -related                                                                            |
| <b>1533</b> | 258804_at | 844   | 0.9 | 1.2 | 1.2 | 1062  | 1.2 | 1.0 | 0.5 | AT3G04760 | pentatricopeptide (PPR) repeat-containing protein                                                           |
| <b>1534</b> | 254303_at | 286   | 1.1 | 0.9 | 0.9 | 339   | 0.9 | 0.9 | 0.5 | AT4G22830 | expressed protein                                                                                           |
| <b>1535</b> | 263596_at | 121   | 0.8 | 1.2 | 0.7 | 158   | 0.9 | 0.6 | 0.5 | AT2G01900 | endonuclease/exonuclease/phosphatase family                                                                 |

Fold induction for 305-1h is averaged from four independent ATH-1 array hybridizations, all others from two independent array hybridizations. Applied threshold is 2-fold. Annotation June 15, 2003.
